# Supplementary material
Source: HighWire-hosted journal article supplement (doi:10.1101/rna.080566.125)
Supplement: Supplemental_Legends.docx [file Supplemental_Legends.docx]

**Legends for Supplementary Figures and Tables**

**Figure S1 |** **A,** Ratio of reads in sequencing libraries prepared from of an equimolar mix of 36 synthetic small RNAs (*n* = 3) using in-house protocol with PEG-8000 and randomized adapters (this study, numerical data are in Table S1). **B,** Ratio of reads in sequencing libraries prepared from of an equimolar mix of 962 synthetic small RNAs (*n* = 3) using Truseq, NEBNext, and in-house protocol with PEG-8000 and randomized adapters (Giraldez et al, 2018, numerical data are in Table S2). **C,** Fraction of mRNA in total RNAs in cell lines and animal tissues (numerical data are in Table S4).

**Figure S2 |** Relative standard deviation of absolute miRNA copy estimates in mouse tissues.

**Figure S3 |** Principal component analyses of miRNA abundance in mouse tissues and human cell lines.

**Table S1 |** Ratio of reads in sequencing libraries prepared from of an equimolar mix of 36 synthetic small RNAs (*n* = 3) using in-house protocol with PEG-8000 and randomized adapters (this study).

**Table S2 |** Ratio of reads in sequencing libraries prepared from of an equimolar mix of 962 synthetic small RNAs (*n* = 4) using Truseq, NEBNext, or in-house protocol with PEG-8000 and randomized adapters (Giraldez et al, 2018).

**Table S3 |** Sequences of nine synthetic spike-in RNAs. Amount of total RNA and spike-in RNAs used to prepare sequencing libraries and number of miRNAs per total RNAs.

**Table S4 |** Number of miRNAs per total RNAs and per total mRNAs.

**Table S5 |** Absolute abundance of each miRNA in 17 mouse tissues and 14 human and mouse cell lines; data are in miRNA copies per 10 pg total RNA; amount of total RNA per cell is shown for cell lines. Data for each replicate are shown separately.

**Table S6 |** Absolute and relative abundance of reporter and total endogenous mRNAs in HEK293T cells.

**Table S7 |** Absolute and relative abundance of each endogenous mRNA in HEK293T cells.

**Table S8 |** miRNAs with abundance of >1,700 copies per 10 pg total RNA in only one mouse organ; data are grouped by organs and are shown as the minimum and maximum of miRNA copies per 10 pg total RNA.

**Table S9 |** miRNAs with abundance of >1,700 copies per 10 pg total RNA in ≤3 (A)or in ≤5 tissues (B); data are the median of miRNA copies per 10 pg total RNA.

**Table S10 |** Five pairs of miRNAs, whose co-expression is exclusive to one mouse tissue; data are the median of miRNA copies per 10 pg total RNA.

**Table S11 |** Sources of and culturing conditions for human and mouse immortalized cell lines used in this study.
