# Supplementary material
Source: HighWire-hosted journal article supplement (doi:10.1101/rna.080566.125)
Supplement: SupplementalTable1.xlsx [file SupplementalTable1.xlsx]

## Sheet: Table S1
					Observed / expected ratio quartiles
					rep1	rep2	rep3	Mean
				Q1	0.554506	0.558109	0.524478	0.545834
				Q2	0.951863	0.982379	0.953029	0.963833
				Q3	1.41989	1.41861	1.40862	1.42073
Used in 9-oligo spike-in mix?	Sequence	Read counts			Observed / expected ratio
		rep1	rep2	rep3	rep1	rep2	rep3	Mean	SD
yes	UGCUAGUCUUAUCGACCUCCUCAUAG	19179	18994	20303	0.196612	0.197094	0.180594	0.191433	0.00939042
yes	UGCUAGUUAUCGACCUUCAUAG	24619	25099	26334	0.252379	0.260444	0.234239	0.249021	0.0134214
	UGCUAGUGAUCGACAAUCAUAG	25978	26797	31343	0.266311	0.278063	0.278794	0.274389	0.00700562
	UGCUAGUUACGUGCAAUCAUAG	28748	31520	31039	0.294707	0.327072	0.27609	0.29929	0.0257985
yes	UGCUAGUUCGAUACCUUCAUAG	33466	32710	35540	0.343073	0.339421	0.316126	0.332873	0.0146184
	UGCUAGUCUUACGUGCAACCUCAUAG	36203	35296	41977	0.371131	0.366255	0.373382	0.370256	0.00364354
	UGCUAGUCUGUUAUGCACAAGACCUCAUAGU	46626	49119	47612	0.477982	0.509691	0.423505	0.470393	0.0435914
yes	UGCUAGUUGUCACGAAUCAUAG	44575	46989	51843	0.456956	0.487589	0.46114	0.468562	0.0166104
yes	UGCUAGUCUUCGAUACCUCCUCAUAG	51957	51371	57046	0.532632	0.533059	0.50742	0.52437	0.0146812
	UGCUAGUCUGUUACGUGCAAGACCUCAUAG	60492	61185	64717	0.620128	0.634896	0.575653	0.610226	0.030838
	AAUCACUAACUCCACUGCCAUC	62687	61027	73173	0.64263	0.633257	0.650868	0.642251	0.00881198
	UGCUAGUUACUGCGAAUCAUAG	72330	69445	83938	0.741484	0.720607	0.746622	0.736238	0.0137781
	CAACGGAAUCCCAAAAGCAGCU	73411	71916	84218	0.752566	0.746248	0.749113	0.749309	0.00316339
	GAUUAGUCCUAUAAAUGCUU	77761	74096	88700	0.797159	0.768869	0.78898	0.785003	0.0145584
	UCAUUUAUAGGACUAAUCUU	86424	84243	85824	0.885967	0.874161	0.763398	0.841175	0.0676154
yes	UGCUAGUCUUGUCACGAACCUCAUAG	83607	85873	94859	0.857089	0.891075	0.843764	0.863976	0.024396
	CAACGGAAUCCCAAAAGCAGCUGU	90817	90020	108166	0.931002	0.934107	0.962128	0.942412	0.0171451
yes	UGCUAGUCUGUUGUCACGAAGACCUCAUAG	90680	95691	103163	0.929597	0.992953	0.917627	0.946726	0.040479
	UGCUAGUCUGAUCGACAACCUCAUAG	96738	96753	108024	0.9917	1.00397	0.960865	0.985513	0.02221
	UGCUAGUCUGUACAUGCGAAGACCUCAUAGU	94887	98770	106262	0.972725	1.0249	0.945192	0.98094	0.0404852
	UGAGGUAGUAGGUUGUAUGGUU	97918	93653	116928	1.0038	0.971805	1.04007	1.00522	0.0341525
	CAACGGAAUCCCAAAAGCAGCUG	110207	108556	126465	1.12978	1.12645	1.1249	1.12704	0.00249303
	UGAGGUAGUAGUUUGUACAGUU	109645	106473	133264	1.12401	1.10483	1.18537	1.13807	0.0420699
	UGCUAGUCUGUUACUGCGAAGACCUCAUAG	110991	118841	123938	1.13781	1.23317	1.10242	1.1578	0.0676298
	AGGCAGUGUAGUUAGCUGAUUGC	120485	118103	147271	1.23514	1.22551	1.30996	1.25687	0.0462296
	UAUUGCACUUGUCCCGGCCUGU	131012	123583	163219	1.34306	1.28238	1.45182	1.35909	0.0858505
	UGCUAGUCUGUGAUCGACAAGACCUCAUAG	141426	136843	156819	1.44981	1.41997	1.39489	1.42156	0.0274952
	UAGGCAGUGUAAUUAGCUGAUUGU	139206	136316	158876	1.42706	1.4145	1.41319	1.41825	0.00765457
yes	UGCUAGUCUGUUAUCGACCUGACCUCAUAG	139553	144983	156470	1.43061	1.50444	1.39179	1.44228	0.0572244
	UGCUAGUCUUACUGCGAACCUCAUAG	136410	138922	169222	1.39839	1.44155	1.50522	1.44839	0.053739
	UGAGGUAGUAGGUUGUAUAGUU	143295	140885	171829	1.46897	1.46192	1.52841	1.48643	0.0365213
	AGGCAGUGUAAUUAGCUGAUUGU	159700	155950	179866	1.63715	1.61824	1.59989	1.61843	0.0186279
yes	UGCUAGUCUGUUCGAUACCUGACCUCAUAG	169142	170431	194818	1.73394	1.7685	1.73289	1.74511	0.0202648
	UGGCAGUGUAUUGUUAGCUGGU	181414	172037	225043	1.85975	1.78517	2.00174	1.88222	0.11002
	UGGAGUGUGACAAUGGUGUUUG	200860	188631	214725	2.0591	1.95736	1.90996	1.97547	0.076199
	UAGGCAGUGUAAUUAGCUGAUUG	219266	208203	264418	2.24778	2.16045	2.35198	2.2534	0.0958867
	Total reads	3511715	3469324	4047252
