# Supplementary material
Source: HighWire-hosted journal article supplement (doi:10.1101/rna.080566.125)
Supplement: SupplementalTable2.xlsx [file SupplementalTable2.xlsx]

## Sheet: Table S2
													Observed / expected ratio quartiles
													NEBNext Small RNA Library Prep Kit					TruSeq Small RNA Library Prep Kit					Randomized adapters and PEG-8000
													Rep1	Rep2	Rep3	Rep4	Mean	Rep1	Rep2	Rep3	Rep4	Mean	Rep1	Rep2	Rep3	Rep4	Mean
												Q1	0.00234513	0.00346709	0.00239568	0.0021789	0.00268339	0.0132052	0.0128566	0.0125932	0.0129482	0.0127651	0.371681	0.376873	0.434646	0.421136	0.4008
												Q2	0.0236271	0.033083	0.0238646	0.0224771	0.0259259	0.088192	0.0873505	0.0876746	0.081087	0.0858549	0.784937	0.794614	0.844296	0.848511	0.813416
												Q3	0.305687	0.382915	0.335763	0.294754	0.343614	0.499168	0.505378	0.500167	0.490814	0.495865	1.37135	1.38868	1.39642	1.40381	1.39731
Accession code for raw data:	SRR6380724	SRR6380725	SRR6380726	SRR6380727	SRR5234319	SRR5234320	SRR5234321	SRR5234322	SRR6380696	SRR6380697	SRR6380698	SRR6380699
Sequence	Read counts												Observed / expected ratio
	NEBNext Small RNA Library Prep Kit				TruSeq Small RNA Library Prep Kit				Randomized adapters and PEG-8000				NEBNext Small RNA Library Prep Kit					TruSeq Small RNA Library Prep Kit					Randomized adapters and PEG-8000
	Rep1	Rep2	Rep3	Rep4	Rep1	Rep2	Rep3	Rep4	Rep1	Rep2	Rep3	Rep4	Rep1	Rep2	Rep3	Rep4	Mean	Rep1	Rep2	Rep3	Rep4	Mean	Rep1	Rep2	Rep3	Rep4	Mean
MIR-542-3P;NA	1045	1610	690	1009	2882	3106	2641	3126	6939	9819	6050	12167	0.122533	0.170443	0.127155	0.115711	0.133961	0.209107	0.210727	0.22937	0.223624	0.218207	1.98277	1.81576	1.7283	1.80724	1.83352
MIR-526B-star;NA	53	33	9	20	304	324	235	313	7296	12011	7837	13622	0.00621458	0.00349356	0.00165854	0.00229358	0.00341507	0.0220571	0.0219818	0.0204096	0.022391	0.0217099	2.08478	2.22111	2.23879	2.02336	2.14201
MIR-520A-3P;NA	13453	20642	9671	11624	805	832	620	803	3302	6149	3970	7102	1.57745	2.18528	1.7822	1.33303	1.71949	0.0584077	0.0564471	0.0538467	0.0574441	0.0565364	0.943524	1.13709	1.13411	1.0549	1.06741
MIR-297C;NA	0	3	1	1	26	21	27	13	1673	3156	2445	4067	0	0.000317596	0.000184283	0.000114679	0.00015414	0.00188646	0.00142475	0.00234494	0.000929979	0.00164653	0.478049	0.583617	0.698462	0.604095	0.591056
MIR-711;NA	65513	59447	36071	52331	6168	5979	4374	5187	1977	3039	1540	3265	7.68181	6.29339	6.64726	6.00128	6.65593	0.447526	0.405646	0.37988	0.371062	0.401028	0.564915	0.561981	0.439931	0.48497	0.512949
MIR-10A;hsa-miR-10a-5p|10x|1x	27583	30482	16395	22738	176450	184054	143142	174990	931	1200	1065	2077	3.23428	3.22699	3.02132	2.60758	3.02254	12.8025	12.4872	12.4318	12.5182	12.5599	0.266027	0.221908	0.304238	0.308509	0.27517
MIR-330-5P;NA	808	1156	553	857	2773	3164	2498	3073	1792	2848	2201	4458	0.0947431	0.122381	0.101908	0.0982801	0.104328	0.201198	0.214662	0.21695	0.219833	0.213161	0.512052	0.526661	0.628758	0.662173	0.582411
EBV-12;NA	5931	8748	3878	5200	623	756	605	706	4268	5296	3479	6500	0.695447	0.926111	0.714648	0.596332	0.733135	0.0452025	0.0512909	0.052544	0.050505	0.0498856	1.21955	0.979352	0.993844	0.965483	1.03956
MIR-518C;NA	6	9	4	4	11	19	4	9	1602	2754	1980	3511	0.000703538	0.000952789	0.000737131	0.000458717	0.000713044	0.000798117	0.00128906	0.000347398	0.000643832	0.000769601	0.457761	0.509278	0.565625	0.521509	0.513543
MIR-552;NA	16777	30617	12805	12360	322	306	245	289	325	463	399	601	1.96721	3.24128	2.35974	1.41743	2.24642	0.0233631	0.0207606	0.0212781	0.0206741	0.021519	0.0928666	0.0856194	0.113982	0.0892701	0.0954345
EBV-16;NA	947	1324	609	1330	2637	2825	2285	2811	2069	2870	1696	3746	0.111042	0.140166	0.112228	0.152523	0.12899	0.191331	0.191662	0.198451	0.20109	0.195634	0.591203	0.530729	0.484495	0.556415	0.540711
MIR-875-3P-mmu;NA	346	433	185	305	185	223	180	198	2648	4200	3021	5316	0.0405707	0.0458398	0.0340923	0.0349772	0.03887	0.0134229	0.0151294	0.0156329	0.0141643	0.0145874	0.756648	0.776677	0.863007	0.789617	0.796487
MIR-770-3P-hsa;NA	239	313	139	220	2149	2196	1531	2059	2452	3830	2133	4494	0.0280243	0.0331359	0.0256153	0.0252294	0.0280012	0.155923	0.148988	0.132967	0.147294	0.146293	0.700643	0.708255	0.609333	0.66752	0.671438
MIR-329-hsa;NA	153	252	75	134	229	172	198	163	1048	1455	1545	3200	0.0179402	0.0266781	0.0138212	0.015367	0.0184516	0.0166154	0.0116694	0.0171962	0.0116605	0.0142854	0.299459	0.269063	0.441359	0.475315	0.371299
MIR-302B;hsa-miR-302b-3p|1x|2x	1450	2162	937	1341	51	44	31	34	2598	3865	2736	5254	0.170022	0.228881	0.172673	0.153785	0.18134	0.00370036	0.00298518	0.00269234	0.00243225	0.00295253	0.742361	0.714728	0.781591	0.780407	0.754772
MIR-344-5P-2;NA	3104	5687	2385	3434	2101	2162	1730	2151	989	1910	1280	2226	0.363964	0.602057	0.439514	0.393808	0.449836	0.15244	0.146681	0.15025	0.153876	0.150812	0.2826	0.353203	0.365657	0.330641	0.333025
MIR-370;hsa-miR-370-3p|1x|2x	83677	95938	54695	88638	5562	6635	4263	5323	2602	4556	3142	7903	9.81165	10.1565	10.0793	10.1649	10.0531	0.403557	0.450152	0.37024	0.380791	0.401185	0.743504	0.842509	0.897573	1.17388	0.914366
MIR-670;NA	11	3	5	9	11	13	4	5	2837	4578	3279	5701	0.00128982	0.000317596	0.000921414	0.00103211	0.000890235	0.000798117	0.000881986	0.000347398	0.000357684	0.000596296	0.810654	0.846578	0.93671	0.846803	0.860186
MIR-674;NA	69	87	38	60	138	157	122	122	3662	4999	3309	7229	0.00809068	0.0092103	0.00700274	0.00688075	0.00779612	0.0100127	0.0106517	0.0105956	0.0087275	0.00999689	1.04639	0.92443	0.94528	1.07377	0.997467
MIR-343-mmu;NA	105	99	37	74	1220	1209	1042	1082	1279	2292	1620	2871	0.0123119	0.0104807	0.00681846	0.00848626	0.00952433	0.0885185	0.0820247	0.0904972	0.0774029	0.0846108	0.365466	0.423844	0.462784	0.426446	0.419635
HSV1-H1;NA	71580	66617	40222	49578	113	105	92	93	8131	11206	6664	13080	8.3932	7.05244	7.41222	5.68557	7.13586	0.00819884	0.00712373	0.00799016	0.00665293	0.00749142	2.32338	2.07225	1.9037	1.94285	2.06054
MIR-743B-3P-mmu;NA	6801	12979	5262	6224	16060	17021	14824	15793	2235	3005	2550	4434	0.79746	1.37403	0.969696	0.713763	0.963737	1.16525	1.15479	1.28746	1.12978	1.18432	0.638636	0.555694	0.728457	0.658608	0.645349
MIR-300-3P-hsa;NA	18093	23231	12212	17109	295071	318898	262589	309729	3736	4768	3506	6402	2.12152	2.45936	2.25046	1.96205	2.19835	21.4092	21.6357	22.8057	22.157	22.0019	1.06754	0.881713	1.00156	0.950927	0.975433
MIR-891A;NA	3197	4384	2226	3746	167849	174093	134753	166494	325	520	411	517	0.374868	0.464114	0.410213	0.429588	0.419696	12.1785	11.8114	11.7032	11.9105	11.9009	0.0928666	0.09616	0.11741	0.076793	0.0958074
MIR-148A;hsa-miR-148a-3p|1x|1x	255599	233421	163848	309100	48663	49797	41788	50125	2001	3536	2896	5475	29.9706	24.7112	30.1944	35.4473	30.0809	3.5308	3.37848	3.62927	3.58578	3.53108	0.571772	0.653888	0.827299	0.813234	0.716548
MIR-500-3P-hsa;hsa-miR-500a-3p|1x|4x	2675	3550	1639	2690	34850	35490	27485	31860	1675	3094	2246	3809	0.313661	0.375822	0.302039	0.308487	0.325002	2.52858	2.40782	2.38706	2.27916	2.40066	0.47862	0.572152	0.641613	0.565773	0.56454
MIR-18B;NA	490	640	277	422	484	474	397	473	1835	2753	1934	3705	0.0574556	0.0677539	0.0510463	0.0483946	0.0561626	0.0351172	0.0321586	0.0344793	0.0338369	0.033898	0.524339	0.509093	0.552485	0.550325	0.534061
MIR-431;NA	471	591	313	598	5788	6330	4783	5702	6472	9423	6193	11826	0.0552277	0.0625665	0.0576805	0.0685782	0.0610132	0.419955	0.429459	0.415401	0.407903	0.41818	1.84933	1.74253	1.76915	1.75659	1.7794
MIR-465ABC;NA	40761	52325	27395	37769	35818	37583	31296	36244	1938	2339	1779	3240	4.77948	5.53941	5.04842	4.33132	4.92466	2.59882	2.54982	2.71804	2.59278	2.61487	0.553771	0.432535	0.508206	0.481256	0.493942
MIR-518D-5P;NA	1290	1679	773	1193	7749	8676	5893	7680	5189	7631	5287	11315	0.151261	0.177748	0.142451	0.136812	0.152068	0.562237	0.588624	0.511804	0.549403	0.553017	1.48272	1.41115	1.51033	1.68068	1.52122
MIR-34B-5P-hsa;NA	2	3	0	2	536	543	492	496	2140	3624	2185	3965	0.000234513	0.000317596	0	0.000229358	0.000195367	0.0388901	0.0368399	0.04273	0.0354823	0.0384856	0.611491	0.670161	0.624188	0.588945	0.623696
MIR-294-3P-rno;NA	109	116	46	91	61	56	34	62	3599	5624	3570	7076	0.0127809	0.0122804	0.008477	0.0104358	0.0109935	0.00442592	0.00379932	0.00295289	0.00443528	0.00390335	1.02839	1.04001	1.01984	1.05104	1.03482
MIR-376C-hsa;NA	7	9	2	6	184	168	130	159	1225	1554	1242	2034	0.000820794	0.000952789	0.000368565	0.000688075	0.000707556	0.0133503	0.011398	0.0112904	0.0113744	0.0118533	0.350036	0.28737	0.354801	0.302122	0.323582
MIR-450B-3P;NA	152	293	98	198	436	528	445	446	3189	4244	3262	5926	0.017823	0.0310186	0.0180597	0.0227065	0.0224019	0.0316345	0.0358222	0.0386481	0.0319054	0.0345025	0.911235	0.784813	0.931854	0.880224	0.877031
MIR-712;NA	667	1080	458	728	24917	22384	20442	25663	1326	2421	1676	2732	0.0782099	0.114335	0.0844015	0.0834865	0.0901082	1.80788	1.51864	1.77538	1.83585	1.73444	0.378896	0.447699	0.478782	0.4058	0.427794
MIR-525-3P;NA	0	3	1	1	19	36	22	30	2965	4892	3302	6342	0	0.000317596	0.000184283	0.000114679	0.00015414	0.00137857	0.00244242	0.00191069	0.00214611	0.00196945	0.847229	0.904644	0.94328	0.942014	0.909292
MIR-769-3P;NA	13	19	12	23	3030	3534	2638	3049	14721	22075	11992	22701	0.00152433	0.00201144	0.00221139	0.00263762	0.0020962	0.219845	0.239764	0.229109	0.218116	0.226709	4.20643	4.08218	3.42575	3.37191	3.77157
MIR-557;NA	492	626	308	512	533	643	405	488	2374	3354	2109	4303	0.0576901	0.0662718	0.0567591	0.0587158	0.0598592	0.0386724	0.0436244	0.0351741	0.03491	0.0380952	0.678355	0.620232	0.602477	0.63915	0.635053
MIR-465-5P;NA	81655	81860	50993	78853	717	759	507	638	2365	2645	1981	3630	9.57456	8.66615	9.39713	9.0428	9.17016	0.0520227	0.0514944	0.0440327	0.0456405	0.0482976	0.675783	0.489121	0.565911	0.539185	0.5675
MIR-553;NA	28	39	10	22	126	154	112	153	4338	6006	3798	7014	0.00328318	0.00412875	0.00184283	0.00252294	0.00294442	0.00914207	0.0104481	0.00972715	0.0109451	0.0100656	1.23955	1.11065	1.08497	1.04183	1.11925
MIR-29C;hsa-miR-29c-3p|2x|1x	0	0	0	0	98	86	79	72	830	1444	1147	1996	0	0	0	0	0	0.0071105	0.00583468	0.00686112	0.00515065	0.00623924	0.237167	0.267029	0.327663	0.296478	0.282084
MIR-489-mmu;NA	2	2	0	0	354	361	236	345	2052	3412	2453	5181	0.000234513	0.000211731	0	0	0.000111561	0.0256849	0.0244921	0.0204965	0.0246802	0.0238384	0.586345	0.630957	0.700747	0.769564	0.671904
MIR-324-5P;hsa-miR-324-5p|1x|5x	0	0	0	0	0	2	0	2	395	755	655	1192	0	0	0	0	0	0	0.00013569	0	0.000143074	6.9691e-05	0.112869	0.139617	0.187113	0.177055	0.154163
MIR-376A-hsa;hsa-miR-376a-3p|1x|4x	42	112	36	37	274	270	201	262	2289	2850	2274	3874	0.00492476	0.0118569	0.00663418	0.00424313	0.00691475	0.0198804	0.0183182	0.0174568	0.0187427	0.0185995	0.654066	0.527031	0.649612	0.575428	0.601534
MIR-409-5P;NA	697	1117	483	653	1466	1285	944	1111	380	764	633	958	0.0817276	0.118252	0.0890086	0.0748855	0.0909684	0.106367	0.0871809	0.081986	0.0794774	0.0887529	0.108582	0.141281	0.180829	0.142297	0.143247
MIR-679;NA	2592	3776	1843	2926	21611	22992	16783	20028	2349	4275	2783	5493	0.303928	0.399748	0.339633	0.335551	0.344715	1.56801	1.55989	1.4576	1.43274	1.50456	0.671211	0.790546	0.795018	0.815908	0.768171
MIR-675;NA	240	404	153	258	111	145	91	112	6539	11068	6554	11961	0.0281415	0.0427697	0.0281953	0.0295872	0.0321734	0.00805373	0.00983753	0.00790331	0.00801213	0.00845168	1.86848	2.04673	1.87228	1.77664	1.89103
MIR-325-3P;NA	3	7	4	4	1849	1915	1614	1821	504	694	605	868	0.000351769	0.000741058	0.000737131	0.000458717	0.000572169	0.134156	0.129923	0.140175	0.130269	0.133631	0.144015	0.128337	0.17283	0.128929	0.143528
MIR-548C-3P;NA	7	11	2	7	296	318	222	319	2189	3483	3331	6828	0.000820794	0.00116452	0.000368565	0.000802754	0.000789159	0.0214766	0.0215747	0.0192806	0.0228203	0.0212881	0.625492	0.644087	0.951565	1.0142	0.808837
MIR-463-star;NA	17	26	7	16	243	208	223	257	1271	1673	1884	3338	0.00199336	0.0027525	0.00128998	0.00183487	0.00196768	0.0176311	0.0141118	0.0193675	0.018385	0.0173738	0.36318	0.309376	0.538201	0.495813	0.426642
MIR-155;NA	211	329	128	159	637	768	544	691	367	407	318	522	0.0247411	0.0348297	0.0235882	0.018234	0.0253483	0.0462183	0.052105	0.0472462	0.049432	0.0487503	0.104868	0.0752637	0.0908429	0.0775357	0.0871275
MIR-891B;NA	20	18	10	9	381	351	322	353	2539	3540	2894	5619	0.00234513	0.00190558	0.00184283	0.00103211	0.00178141	0.0276439	0.0238136	0.0279656	0.0252525	0.0261689	0.725502	0.654628	0.826727	0.834623	0.76037
MIR-764-3P;NA	12	14	13	12	4991	5349	4023	4898	1089	1995	1236	1982	0.00140708	0.00148212	0.00239568	0.00137615	0.00166525	0.362128	0.362903	0.349396	0.350387	0.356204	0.311174	0.368921	0.353087	0.294398	0.331895
MIR-450B-5P-hsa;hsa-miR-450b-5p|1x|1x	15846	23446	11348	16654	19252	19621	17203	20061	2968	3714	2758	4957	1.85804	2.48212	2.09124	1.90987	2.08532	1.39685	1.33119	1.49407	1.4351	1.4143	0.848086	0.686804	0.787876	0.736292	0.764765
MIR-664-3P;NA	22	32	18	31	756	798	672	692	3847	5648	4091	8028	0.00257964	0.0033877	0.00331709	0.00355506	0.00320987	0.0548524	0.0541404	0.0583629	0.0495035	0.0542148	1.09925	1.04445	1.16867	1.19245	1.1262
MIR-323-3P;hsa-miR-323a-3p|8x|1x	14171	18324	9660	13068	3175	3676	2521	3049	872	1135	838	1230	1.66164	1.93988	1.78017	1.49863	1.72008	0.230366	0.249398	0.218948	0.218116	0.229207	0.249168	0.209888	0.239391	0.182699	0.220286
MIR-450B-5P-rno;NA	44	73	24	39	522	584	435	534	2486	3193	2383	4647	0.00515928	0.00772818	0.00442279	0.00447249	0.00544568	0.0378743	0.0396215	0.0377796	0.0382007	0.038369	0.710358	0.590459	0.68075	0.690246	0.667953
MIR-449C;NA	1	2	0	0	2	2	5	1	3132	5610	3955	7922	0.000117256	0.000211731	0	0	8.22468e-05	0.000145112	0.00013569	0.000434248	7.15368e-05	0.000196647	0.894948	1.03742	1.12982	1.1767	1.05972
MIR-297A;NA	7	8	9	13	37	44	48	50	4779	7944	5435	9880	0.000820794	0.000846924	0.00165854	0.00149083	0.00120427	0.00268458	0.00298518	0.00416878	0.00357684	0.00335385	1.36557	1.46903	1.55261	1.46753	1.46369
MIR-717;NA	1371	2205	960	1096	5857	5910	4839	5973	5652	9138	6911	13173	0.160758	0.233433	0.176911	0.125688	0.174198	0.424961	0.400964	0.420265	0.42729	0.41837	1.61502	1.68983	1.97426	1.95666	1.80894
MIR-713;NA	64	107	62	106	5154	5662	4525	5487	1409	2465	2179	3715	0.0075044	0.0113276	0.0114255	0.012156	0.0106034	0.373954	0.384139	0.392994	0.392523	0.385903	0.402612	0.455835	0.622474	0.551811	0.508183
HCMV-UL112;NA	469	697	282	469	50798	54251	43229	51052	5340	7711	4483	9033	0.0549932	0.0737882	0.0519677	0.0537845	0.0586334	3.68571	3.68066	3.75442	3.6521	3.69322	1.52587	1.42594	1.28066	1.34172	1.39355
MIR-550;NA	97	128	54	69	19	25	29	31	5	10	6	5	0.0113739	0.0135508	0.00995127	0.00791286	0.0106972	0.00137857	0.00169613	0.00251864	0.00221764	0.00195274	0.00142872	0.00184923	0.00171402	0.000742679	0.00143366
MIR-558;NA	5569	8265	3854	4886	3073	3230	2525	2865	7646	12376	7527	13994	0.653	0.874978	0.710226	0.560323	0.699632	0.222965	0.21914	0.219295	0.204953	0.216588	2.18479	2.28861	2.15023	2.07861	2.17556
MIR-518E;NA	30	20	15	25	3795	4106	3088	3586	6980	11651	6482	11244	0.00351769	0.00211731	0.00276424	0.00286698	0.00281655	0.275351	0.278572	0.268191	0.256531	0.269661	1.99449	2.15454	1.85171	1.67014	1.91772
MIR-554;NA	31	25	16	15	443	511	374	468	4135	6139	4189	7864	0.00363494	0.00264664	0.00294852	0.00172019	0.00273757	0.0321424	0.0346688	0.0324817	0.0334792	0.033193	1.18155	1.13524	1.19667	1.16809	1.17039
MIR-9-star;NA	51	90	36	46	86	96	79	102	595	748	593	942	0.00598007	0.00952789	0.00663418	0.00527524	0.00685435	0.00623983	0.00651313	0.00686112	0.00729676	0.00672771	0.170017	0.138322	0.169402	0.139921	0.154416
MIR-26B;hsa-miR-26b-5p|1x|5x	29	42	17	30	52	54	28	32	20	39	28	30	0.00340043	0.00444635	0.00313281	0.00344038	0.00360499	0.00377292	0.00366363	0.00243179	0.00228918	0.00303938	0.00571487	0.007212	0.00799874	0.00445608	0.00634542
MIR-449B-rno;NA	222	296	139	216	5245	5869	4490	5416	3106	5171	3173	6467	0.0260309	0.0313362	0.0256153	0.0247707	0.0269383	0.380557	0.398183	0.389955	0.387444	0.389034	0.887519	0.956237	0.906429	0.960581	0.927692
MIR-200C;hsa-miR-200c-3p|8x|1x	1693	3058	1223	1780	267	304	271	322	3847	5461	3322	6215	0.198515	0.323737	0.225378	0.204129	0.23794	0.0193725	0.0206249	0.0235362	0.0230349	0.0216421	1.09925	1.00986	0.948994	0.92315	0.995316
MIR-508-3P;NA	8121	11857	5549	8089	17723	18648	15621	17753	5899	8695	5455	11006	0.952238	1.25525	1.02258	0.92764	1.03943	1.28591	1.26517	1.35668	1.26999	1.29444	1.6856	1.60791	1.55833	1.63479	1.62165
MIR-654-5P-mmu;NA	15561	19835	10633	16048	62	52	49	40	6304	9154	5554	10708	1.82463	2.09984	1.95948	1.84037	1.93108	0.00449848	0.00352794	0.00425563	0.00286147	0.00378588	1.80133	1.69279	1.58661	1.59052	1.66781
MIR-672;NA	6346	8160	4183	5038	8674	8941	6370	8121	3950	5711	3011	6127	0.744108	0.863862	0.770855	0.577754	0.739145	0.629352	0.606603	0.553232	0.580951	0.592534	1.12869	1.0561	0.860151	0.910079	0.988753
MIR-676;NA	11388	13472	7411	9704	39883	40558	32126	39656	2837	4196	2435	4795	1.33531	1.42622	1.36572	1.11285	1.31003	2.89376	2.75166	2.79013	2.83687	2.8181	0.810654	0.775937	0.695605	0.71223	0.748606
MIR-181A-star;NA	3932	6123	2722	4292	94749	99911	78720	95550	6178	8816	6123	11246	0.461052	0.648214	0.501618	0.492203	0.525772	6.87462	6.77847	6.8368	6.83535	6.83131	1.76532	1.63028	1.74915	1.67043	1.7038
MIR-532-5P;hsa-miR-532-5p|3x|1x	19236	27801	13796	16840	4496	4405	3720	4492	2703	4419	2862	5354	2.25554	2.94317	2.54236	1.9312	2.41807	0.326212	0.298858	0.32308	0.321344	0.317373	0.772364	0.817175	0.817586	0.795261	0.800596
MIR-518C-star;NA	35011	37416	20326	37619	14010	16290	11192	14024	4299	5786	4252	8789	4.10526	3.96106	3.74573	4.31412	4.03154	1.01651	1.1052	0.97202	1.00323	1.02424	1.22841	1.06996	1.21467	1.30548	1.20463
MIR-193A-3P;NA	0	0	0	0	10	7	5	4	178	353	222	392	0	0	0	0	0	0.000725561	0.000474915	0.000434248	0.000286147	0.000480218	0.0508623	0.0652778	0.0634186	0.0582261	0.0594462
MIR-141;hsa-miR-141-3p|1.5x|1x	4	2	1	6	227	232	223	261	2698	4724	3376	6097	0.000469025	0.000211731	0.000184283	0.000688075	0.000388279	0.0164702	0.0157401	0.0193675	0.0186711	0.0175622	0.770935	0.873576	0.96442	0.905623	0.878639
MIR-718;NA	1021	1207	620	1059	1454	1907	1085	1485	8048	14042	8894	18128	0.119719	0.12778	0.114255	0.121445	0.1208	0.105497	0.129381	0.0942318	0.106232	0.108835	2.29966	2.59669	2.54074	2.69266	2.53244
MIR-714;NA	217	366	135	197	108493	114746	84413	108307	12223	19926	11846	23951	0.0254446	0.0387468	0.0248782	0.0225918	0.0279153	7.87183	7.78495	7.33123	7.74794	7.68399	3.49264	3.68478	3.38404	3.55758	3.52976
MIR-673-5P-mmu;NA	49	74	19	44	8830	9548	6995	8960	6061	9178	6311	12464	0.00574556	0.00783405	0.00350137	0.00504588	0.00553172	0.640671	0.647785	0.607513	0.64097	0.634235	1.73189	1.69722	1.80286	1.85135	1.77083
MIR-455-3P;NA	10	31	11	14	4	17	8	15	1862	3774	2869	6192	0.00117256	0.00328183	0.00202711	0.00160551	0.00202175	0.000290225	0.00115337	0.000694797	0.00107305	0.00080286	0.532054	0.6979	0.819586	0.919734	0.742318
MIR-559;NA	6	5	1	2	299	345	278	298	189	273	245	380	0.000703538	0.000529327	0.000184283	0.000229358	0.000411627	0.0216943	0.0234065	0.0241442	0.021318	0.0226407	0.0540055	0.050484	0.069989	0.0564436	0.0577305
MIR-589-star;NA	5	10	2	4	21674	23347	17394	21698	2398	4091	2454	4624	0.000586281	0.00105865	0.000368565	0.000458717	0.000618055	1.57258	1.58398	1.51066	1.55221	1.55486	0.685212	0.75652	0.701033	0.68683	0.707399
MIR-518F;NA	75	52	20	60	46	43	29	55	1918	3162	2144	3892	0.00879422	0.00550501	0.00368565	0.00688075	0.00621641	0.00333758	0.00291734	0.00251864	0.00393453	0.00317702	0.548056	0.584727	0.612475	0.578102	0.58084
MIR-555;NA	593	804	381	643	4315	4382	3532	4262	1827	3444	1854	3015	0.069533	0.0851159	0.0702117	0.0737387	0.0746498	0.31308	0.297297	0.306753	0.30489	0.305505	0.522053	0.636875	0.529631	0.447836	0.534099
MIR-193B-mmu;NA	7	3	1	3	327	328	259	324	606	1109	1042	1932	0.000820794	0.000317596	0.000184283	0.000344038	0.000416678	0.0237259	0.0222532	0.022494	0.0231779	0.0229128	0.17316	0.20508	0.297668	0.286971	0.24072
MIR-181B;hsa-miR-181b-1-5p|1x|2x	249	372	174	259	27966	30535	22309	27420	848	1279	1046	1822	0.0291968	0.039382	0.0320652	0.0297019	0.0325865	2.0291	2.07165	1.93753	1.96154	1.99996	0.24231	0.236517	0.29881	0.270632	0.262067
MIR-874;hsa-miR-874-3p|1x|10x	3	10	2	5	2462	2684	1938	2371	1820	3383	1548	1836	0.000351769	0.00105865	0.000368565	0.000573396	0.000588096	0.178633	0.182096	0.168314	0.169614	0.174664	0.520053	0.625595	0.442216	0.272712	0.465144
MIR-677;NA	2720	3792	1930	2861	16149	16942	13749	16372	433	605	418	602	0.318937	0.401442	0.355666	0.328097	0.351035	1.17171	1.14943	1.19409	1.1712	1.17161	0.123727	0.111878	0.11941	0.0894186	0.111108
MIR-335;hsa-miR-335-5p|3x|1x	20	41	11	19	954	990	889	944	661	842	809	1474	0.00234513	0.00434048	0.00202711	0.0021789	0.00272291	0.0692185	0.0671666	0.0772093	0.0675308	0.0702813	0.188876	0.155705	0.231107	0.218942	0.198657
EBV-18-5P;NA	43	89	36	18	261	263	231	253	1531	2309	2127	4270	0.00504202	0.00942203	0.00663418	0.00206423	0.00579061	0.0189371	0.0178433	0.0200623	0.0180988	0.0187354	0.437473	0.426987	0.607619	0.634248	0.526582
MIR-302C-rno;NA	847	927	460	850	116	158	124	132	4256	6433	4494	9346	0.0993161	0.0981373	0.08477	0.0974773	0.0949252	0.00841651	0.0107195	0.0107693	0.00944286	0.00983706	1.21612	1.18961	1.2838	1.38822	1.26944
MIR-490-5P;NA	140	201	70	100	3010	3504	2268	2845	8832	13699	7035	13089	0.0164159	0.021279	0.0128998	0.0114679	0.0155156	0.218394	0.237729	0.196975	0.203522	0.214155	2.52368	2.53326	2.00968	1.94419	2.2527
RLCV-14-5P;NA	25077	34108	16810	21861	26061	27741	21288	25577	8737	13817	8286	17500	2.94044	3.61086	3.09779	2.507	3.03902	1.89089	1.88209	1.84885	1.8297	1.86288	2.49654	2.55508	2.36706	2.59938	2.50451
MIR-331-3P;hsa-miR-331-3p|1.5x|1x	0	0	0	5	36	22	9	12	921	1840	1541	3470	0	0	0	0.000573396	0.000143349	0.00261202	0.00149259	0.000781646	0.000858442	0.00143618	0.26317	0.340258	0.440217	0.515419	0.389766
MIR-144;hsa-miR-144-3p|1x|2x	33	53	31	42	408	411	367	431	4103	6188	3546	6042	0.00386946	0.00561087	0.00571276	0.00481653	0.0050024	0.0296029	0.0278843	0.0318738	0.0308324	0.0300483	1.1724	1.1443	1.01298	0.897454	1.05679
MIR-139-5P;NA	2242	2868	1391	1933	93	93	78	75	991	1380	1170	2202	0.262889	0.303622	0.256337	0.221675	0.261131	0.00674772	0.00630959	0.00677427	0.00536526	0.00629921	0.283172	0.255194	0.334233	0.327076	0.299919
MIR-185;hsa-miR-185-5p|1x|10x	577	986	409	687	20	36	20	27	3147	4722	3440	6291	0.0676569	0.104383	0.0753716	0.0787846	0.0815491	0.00145112	0.00244242	0.00173699	0.00193149	0.00189051	0.899234	0.873207	0.982703	0.934439	0.922396
MIR-516A-3P;NA	19	12	8	13	1847	2066	1429	1731	11951	19543	10848	19801	0.00222787	0.00127039	0.00147426	0.00149083	0.00161584	0.134011	0.140168	0.124108	0.12383	0.130529	3.41492	3.61395	3.09894	2.94116	3.26724
MIR-770-5P-hsa;NA	61	111	46	69	29845	35338	24336	29443	3360	5377	3682	7939	0.00715263	0.0117511	0.008477	0.00791286	0.00882339	2.16544	2.39751	2.11357	2.10626	2.19569	0.960098	0.994331	1.05183	1.17923	1.04637
MIR-465D;NA	49562	54952	30328	49006	697	792	522	645	1798	2171	1570	2812	5.81146	5.81752	5.58893	5.61997	5.70947	0.0505716	0.0537333	0.0453355	0.0461413	0.0489454	0.513766	0.401468	0.448501	0.417683	0.445355
MIR-290-5P;NA	27	31	24	29	73	83	49	77	4349	6942	5348	10614	0.00316592	0.00328183	0.00442279	0.0033257	0.00354906	0.0052966	0.00563114	0.00425563	0.00550834	0.00517293	1.2427	1.28374	1.52776	1.57656	1.40769
EBV-6-5P;NA	52	73	19	32	2171	2556	1768	2164	10851	16211	8866	16911	0.00609733	0.00772818	0.00350137	0.00366973	0.00524915	0.157519	0.173412	0.15355	0.154806	0.159822	3.1006	2.99779	2.53274	2.51189	2.78576
MIR-374A;hsa-miR-374a-5p|1x|5x	29	53	24	35	166	194	153	182	4414	6209	3782	7201	0.00340043	0.00561087	0.00442279	0.00401377	0.00436197	0.0120443	0.0131619	0.013288	0.0130197	0.0128785	1.26127	1.14819	1.0804	1.06961	1.13987
MIR-30A;hsa-miR-30a-5p|8x|1x	2228	2937	1371	2236	2554	2729	2121	2555	5229	7180	4575	8906	0.261247	0.310927	0.252652	0.256423	0.270312	0.185308	0.185149	0.184208	0.182777	0.184361	1.49415	1.32775	1.30694	1.32286	1.36292
MIR-719;NA	67030	90102	45171	61346	22543	22007	18854	22177	3924	5270	4004	7184	7.85969	9.53869	8.32423	7.03511	8.18943	1.63563	1.49307	1.63746	1.58647	1.58816	1.12126	0.974544	1.14382	1.06708	1.07668
MIR-715;NA	115	111	36	73	1468	1554	1141	1320	2338	4042	3115	5470	0.0134845	0.0117511	0.00663418	0.00837158	0.0100603	0.106512	0.105431	0.0990954	0.0944286	0.101367	0.668068	0.747459	0.88986	0.812491	0.77947
HCMV-US5-1;NA	1102	1956	738	879	514	470	397	477	2819	4911	3454	6681	0.129216	0.207073	0.136001	0.100803	0.143273	0.0372938	0.0318872	0.0344793	0.0341231	0.0344458	0.80551	0.908157	0.986702	0.992368	0.923184
MIR-152;hsa-miR-152-3p|1x|2x	553	785	332	520	176	158	142	169	3746	6030	2935	4537	0.0648427	0.0831044	0.0611819	0.0596332	0.0671905	0.0127699	0.0107195	0.0123326	0.0120897	0.0119779	1.07039	1.11509	0.83844	0.673907	0.924457
MIR-801;NA	295	519	176	303	2634	2856	2041	2480	7945	11466	7445	13459	0.0345906	0.0549442	0.0324338	0.0347478	0.0391791	0.191113	0.193766	0.17726	0.177411	0.184887	2.27023	2.12033	2.12681	1.99914	2.12913
MIR-497-2;hsa-miR-497-5p|2x|1x	7	8	2	8	881	1030	784	902	4007	6913	4429	8464	0.000820794	0.000846924	0.000368565	0.000917434	0.000738429	0.0639219	0.0698804	0.0680901	0.0645262	0.0666047	1.14497	1.27837	1.26523	1.25721	1.23645
MIR-100;hsa-miR-100-5p|1x|5x	36531	46201	22536	30477	9008	8827	7130	8614	665	1190	880	1455	4.28349	4.89109	4.153	3.49508	4.20566	0.653586	0.598868	0.619237	0.616218	0.621977	0.190019	0.220058	0.251389	0.21612	0.219397
MIR-642;NA	28	50	24	21	1092	1371	915	1067	714	1295	945	1876	0.00328318	0.00529327	0.00442279	0.00240826	0.00385187	0.0792313	0.0930156	0.0794674	0.0763298	0.082011	0.204021	0.239475	0.269958	0.278653	0.248027
HIV1-N367;NA	1210	2117	846	1330	1457	1525	1157	1319	7229	11803	8231	16048	0.14188	0.224117	0.155903	0.152523	0.168606	0.105714	0.103464	0.100485	0.0943571	0.101005	2.06564	2.18265	2.35134	2.3837	2.24583
MIR-327-rno;NA	268	411	199	340	389	428	332	409	3470	5659	3160	5907	0.0314247	0.0435107	0.0366723	0.0389909	0.0376496	0.0282243	0.0290377	0.0288341	0.0292586	0.0288387	0.991529	1.04648	0.902715	0.877401	0.954531
MIR-678;NA	6423	7466	3931	6523	22421	24765	17264	21716	6338	9898	5766	10933	0.753137	0.790392	0.724415	0.748052	0.753999	1.62678	1.68018	1.49937	1.55349	1.58996	1.81104	1.83037	1.64717	1.62394	1.72813
EBV-1-5P;NA	106382	97464	59609	110850	139	183	108	150	3984	4770	2916	5623	12.474	10.3181	10.9849	12.7122	11.6223	0.0100853	0.0124156	0.00937975	0.0107305	0.0106528	1.1384	0.882083	0.833012	0.835217	0.922178
MIR-338-3P;NA	1	0	0	1	179	206	143	202	355	513	471	854	0.000117256	0	0	0.000114679	5.79839e-05	0.0129875	0.0139761	0.0124195	0.0144504	0.0134584	0.101439	0.0948655	0.13455	0.12685	0.114426
MIR-344-3P-rno;NA	60	123	64	62	274	316	244	294	5210	8760	5209	9152	0.00703538	0.0130215	0.0117941	0.00711011	0.00974026	0.0198804	0.021439	0.0211913	0.0210318	0.0208856	1.48872	1.61993	1.48805	1.3594	1.48903
EBV-17-3P;NA	98	181	63	107	1075	1180	913	1091	872	1491	1431	2413	0.0114911	0.0191617	0.0116098	0.0122707	0.0136333	0.0779978	0.0800572	0.0792937	0.0780467	0.0788488	0.249168	0.27572	0.408793	0.358417	0.323025
MIR-382-star;NA	3249	4184	2271	3674	1220	1310	995	1118	7442	9933	6420	11482	0.380966	0.442941	0.418506	0.421331	0.415936	0.0885185	0.088877	0.0864153	0.0799782	0.0859473	2.1265	1.83684	1.834	1.70549	1.87571
MIR-544-hsa;NA	1	1	1	1	17	12	11	17	325	456	410	739	0.000117256	0.000105865	0.000184283	0.000114679	0.000130521	0.00123345	0.000814141	0.000955345	0.00121613	0.00105477	0.0928666	0.0843249	0.117124	0.109768	0.101021
MIR-421-5P;NA	38	52	20	45	1215	1297	888	997	1195	1969	1375	2689	0.00445574	0.00550501	0.00368565	0.00516056	0.00470174	0.0881557	0.087995	0.0771224	0.0713222	0.0811488	0.341463	0.364113	0.392795	0.399413	0.374446
MIR-183;hsa-miR-183-5p|1x|2x	92943	100781	59739	87465	26320	27984	22119	28237	159	268	141	143	10.8982	10.6692	11.0089	10.0304	10.6517	1.90968	1.89858	1.92103	2.01999	1.93732	0.0454332	0.0495594	0.0402794	0.0212406	0.0391281
MIR-882;NA	704	1237	540	774	2657	2821	2392	2731	749	1177	1225	2884	0.0825484	0.130956	0.0995127	0.0887617	0.100445	0.192782	0.191391	0.207744	0.195367	0.196821	0.214022	0.217654	0.349945	0.428377	0.3025
MIR-485-3P;hsa-miR-485-3p|1x|4x	9620	15706	6950	8947	1635	1835	1322	1626	2352	2976	2357	4234	1.12801	1.66272	1.28076	1.02603	1.27438	0.118629	0.124496	0.114815	0.116319	0.118565	0.672068	0.550331	0.673323	0.628901	0.631156
MIR-521;NA	1	1	0	0	1	3	0	1	4019	6444	3765	7244	0.000117256	0.000105865	0	0	5.57804e-05	7.25561e-05	0.000203535	0	7.15368e-05	8.6907e-05	1.1484	1.19164	1.07555	1.07599	1.1229
MIR-463-rno;NA	193	347	92	135	244	334	235	255	5475	9045	5407	10758	0.0226305	0.0367353	0.016954	0.0154817	0.0229504	0.0177037	0.0226603	0.0204096	0.0182419	0.0197539	1.56444	1.67263	1.54461	1.59795	1.59491
MIR-616-star;NA	18	49	22	22	5843	6240	5336	5904	889	1307	1076	2089	0.00211061	0.00518741	0.00405422	0.00252294	0.0034688	0.423945	0.423353	0.463429	0.422354	0.43327	0.254026	0.241694	0.30738	0.310291	0.278348
HCMV-US5-2;NA	7544	10121	5135	6791	2963	3347	2543	3095	2138	2999	1899	3548	0.884581	1.07146	0.946292	0.778786	0.920281	0.214984	0.227077	0.220858	0.221407	0.221082	0.610919	0.554584	0.542486	0.527005	0.558749
MIR-802;NA	19	17	6	12	509	512	409	529	5168	8112	5291	10208	0.00222787	0.00179971	0.0011057	0.00137615	0.00162736	0.0369311	0.0347367	0.0355215	0.037843	0.0362581	1.47672	1.5001	1.51148	1.51625	1.50114
MIR-453-rno;NA	159	312	152	196	896	1000	764	825	4367	6684	4502	9632	0.0186437	0.03303	0.028011	0.0224771	0.0255405	0.0650103	0.0678451	0.0663531	0.0590179	0.0645566	1.24784	1.23603	1.28608	1.4307	1.30016
MIR-647;NA	1355	2001	942	1531	1300	1311	1068	1249	468	973	827	1265	0.158882	0.211837	0.173594	0.175574	0.179972	0.094323	0.0889449	0.0927553	0.0893495	0.0913432	0.133728	0.17993	0.236249	0.187898	0.184451
MIR-643;NA	19	17	9	18	414	450	345	392	3791	5645	3762	7384	0.00222787	0.00179971	0.00165854	0.00206423	0.00193759	0.0300382	0.0305303	0.0299631	0.0280424	0.0296435	1.08325	1.04389	1.07469	1.09679	1.07466
MIR-30B;hsa-miR-30b-5p|10x|1x	0	1	0	0	190	253	181	189	886	1434	1339	2353	0	0.000105865	0	0	2.64664e-05	0.0137857	0.0171648	0.0157198	0.0135205	0.0150477	0.253169	0.26518	0.382511	0.349505	0.312591
MIR-148B;hsa-miR-148b-3p|1x|1.5x	3319	4541	2219	3900	2620	2866	2341	2641	4635	7306	5126	10283	0.389174	0.480735	0.408923	0.447249	0.43152	0.190097	0.194444	0.203315	0.188929	0.194196	1.32442	1.35105	1.46434	1.52739	1.4168
MIR-488;NA	196	329	132	197	22530	23946	19323	23227	3233	4774	3227	6321	0.0229822	0.0348297	0.0243253	0.0225918	0.0261823	1.63469	1.62462	1.67819	1.66159	1.64977	0.923808	0.882823	0.921855	0.938895	0.916845
MIR-199B-5P;NA	42	82	42	52	204	146	125	189	225	345	349	570	0.00492476	0.00868097	0.00773987	0.00596332	0.00682723	0.0148015	0.00990538	0.0108562	0.0135205	0.0122709	0.0642922	0.0637985	0.0996986	0.0846654	0.0781137
MIR-488-star-mmu;NA	794	1140	546	1007	136174	137473	115218	136817	24	39	54	140	0.0931015	0.120687	0.100618	0.115482	0.107472	9.88026	9.32686	10.0066	9.78746	9.7503	0.00685784	0.007212	0.0154261	0.020795	0.0125728
MIR-765;NA	25534	24781	14744	25152	237	199	176	194	7555	10519	6414	12479	2.99402	2.62345	2.71706	2.88441	2.80474	0.0171958	0.0135012	0.0152855	0.0138781	0.0149652	2.15879	1.94521	1.83228	1.85358	1.94746
MIR-761;NA	124	210	73	126	1432	1480	1150	1433	9800	15817	9095	18742	0.0145398	0.0222318	0.0134526	0.0144496	0.0161684	0.1039	0.100411	0.099877	0.102512	0.101675	2.80028	2.92493	2.59816	2.78386	2.77681
MIR-105-rno;NA	891	1397	647	936	2646	2992	2172	2645	847	1040	841	1410	0.104475	0.147894	0.119231	0.10734	0.119735	0.191984	0.202992	0.188637	0.189215	0.193207	0.242025	0.19232	0.240248	0.209436	0.221007
MIR-411-star-rno;NA	246	396	181	273	3178	3934	2773	3190	7596	10254	7286	13549	0.028845	0.0419227	0.0333552	0.0313074	0.0338576	0.230583	0.266902	0.240834	0.228203	0.241631	2.17051	1.8962	2.08139	2.01251	2.04015
MIR-34C-5P;hsa-miR-34c-5p|1x|3x	1411	1965	905	1456	16762	17650	14034	16467	1957	3373	2381	4825	0.165449	0.208026	0.166776	0.166973	0.176806	1.21619	1.19747	1.21885	1.178	1.20262	0.5592	0.623745	0.680179	0.716686	0.644952
MIR-380-3P;NA	123	207	98	135	376	380	327	333	2636	3115	2435	4315	0.0144225	0.0219142	0.0180597	0.0154817	0.0174695	0.0272811	0.0257811	0.0283998	0.0238218	0.026321	0.753219	0.576035	0.695605	0.640932	0.666448
MIR-129-3P;NA	2	0	1	3	79	75	35	62	1431	3021	2266	5121	0.000234513	0	0.000184283	0.000344038	0.000190708	0.00573193	0.00508838	0.00303973	0.00443528	0.00457383	0.408899	0.558653	0.647327	0.760652	0.593883
MIR-556-5P;NA	287	340	182	219	64	81	54	72	1806	2906	2155	4198	0.0336526	0.0359943	0.0335395	0.0251147	0.0320753	0.00464359	0.00549545	0.00468988	0.00515065	0.00499489	0.516052	0.537386	0.615618	0.623554	0.573152
LET-7C;hsa-let-7c-5p|1x|5x	4656	4895	3008	4885	3981	4180	3540	4074	5265	7563	4237	7843	0.545945	0.518212	0.554322	0.560208	0.544672	0.288846	0.283592	0.307447	0.291441	0.292832	1.50444	1.39857	1.21038	1.16497	1.31959
MIR-887;NA	8	5	1	0	4860	5454	3349	4603	3805	6772	3303	5041	0.00093805	0.000529327	0.000184283	0	0.000412915	0.352623	0.370027	0.290859	0.329284	0.335698	1.08725	1.2523	0.943566	0.748769	1.00797
MIR-322-hsa;NA	4	9	3	3	132	165	115	164	2285	3810	2589	5247	0.000469025	0.000952789	0.000552848	0.000344038	0.000579675	0.00957741	0.0111944	0.0099877	0.011732	0.0106229	0.652923	0.704557	0.739598	0.779368	0.719112
MIR-522;NA	2865	4200	1912	2124	278	227	157	175	1126	1750	1715	3548	0.335939	0.444635	0.352349	0.243579	0.344125	0.0201706	0.0154008	0.0136354	0.0125189	0.0154314	0.321747	0.323615	0.489923	0.527005	0.415573
MIR-367;NA	1	0	1	0	5	5	1	4	6070	9807	5743	9913	0.000117256	0	0.000184283	0	7.53848e-05	0.000362781	0.000339225	8.68496e-05	0.000286147	0.000268751	1.73446	1.81354	1.6406	1.47244	1.66526
MIR-543-3P;hsa-miR-543|8x|1x	55632	69033	38131	62265	791	862	602	758	6609	9816	6020	12323	6.5232	7.30821	7.02688	7.1405	6.9997	0.0573919	0.0584824	0.0522834	0.0542249	0.0555957	1.88848	1.8152	1.71973	1.83041	1.81345
MIR-346-mmu;NA	659	1137	501	739	411	408	320	355	375	619	490	630	0.0772719	0.120369	0.0923256	0.0847479	0.0936786	0.0298206	0.0276808	0.0277919	0.0253956	0.0276722	0.107154	0.114467	0.139978	0.0935776	0.113794
MIR-644;NA	10764	14733	7362	11576	52328	56156	44277	53495	3250	5625	3942	7095	1.26215	1.55972	1.35669	1.32753	1.37652	3.79672	3.80991	3.84544	3.82686	3.81973	0.928666	1.04019	1.12611	1.05386	1.03721
MIR-411-star;NA	1780	2228	1017	1910	2859	3007	2492	2754	715	1024	964	1776	0.208716	0.235868	0.187416	0.219037	0.212759	0.207438	0.20401	0.216429	0.197012	0.206222	0.204306	0.189361	0.275385	0.2638	0.233213
MIR-640;NA	4417	6262	3116	4740	46450	49755	39164	46330	4775	7670	5156	9982	0.517921	0.66293	0.574225	0.543579	0.574664	3.37023	3.37563	3.40138	3.3143	3.36539	1.36442	1.41836	1.47291	1.48269	1.4346
MIR-648;NA	73	102	52	92	34	54	35	51	4422	7788	4534	7278	0.00855971	0.0107983	0.0095827	0.0105505	0.00987279	0.00246691	0.00366363	0.00303973	0.00364838	0.00320466	1.26356	1.44018	1.29523	1.08104	1.27
KSHV-K12-3-star;NA	461	792	359	491	1675	1844	1426	1640	9124	15831	9470	19297	0.0540551	0.0838455	0.0661575	0.0563075	0.0650914	0.121532	0.125106	0.123847	0.11732	0.121951	2.60712	2.92752	2.70529	2.8663	2.77656
MIR-467AB;NA	162	219	72	77	311	369	289	337	4577	7229	5129	9767	0.0189955	0.0231845	0.0132684	0.0088303	0.0160697	0.022565	0.0250348	0.0250995	0.0241079	0.0242018	1.30785	1.33681	1.4652	1.45075	1.39015
MIR-518E-star;NA	2535	3387	1589	2397	2999	3784	2441	2971	7357	9872	6826	14621	0.297245	0.358566	0.292825	0.274886	0.305881	0.217596	0.256726	0.212	0.212536	0.224714	2.10221	1.82556	1.94998	2.17174	2.01237
MIR-488-hsa;NA	6	17	3	7	1194	1296	1116	1193	5146	7501	5310	10378	0.000703538	0.00179971	0.000552848	0.000802754	0.000964713	0.086632	0.0879272	0.0969241	0.0853435	0.0892067	1.47044	1.38711	1.5169	1.54151	1.47899
HCMV-US25-2-3P;NA	3823	5524	2490	3919	85090	92761	65272	84423	3831	6187	3765	7420	0.448271	0.584801	0.458864	0.449428	0.485341	6.1738	6.29338	5.66884	6.03936	6.04384	1.09468	1.14412	1.07555	1.10214	1.10412
MIR-30A-star;NA	21974	24827	14026	22729	62913	67932	51296	62607	8364	11261	6693	12770	2.57659	2.62832	2.58475	2.60654	2.59905	4.56472	4.60885	4.45504	4.47871	4.52683	2.38996	2.08242	1.91199	1.8968	2.07029
MIR-373;hsa-miR-373-3p|1x|1.5x	350	480	217	257	14943	16358	11749	14643	2484	4065	2578	5746	0.0410397	0.0508154	0.0399893	0.0294726	0.0403293	1.08421	1.10981	1.0204	1.04751	1.06548	0.709786	0.751712	0.736456	0.853487	0.76286
MIR-762;NA	21441	23340	13441	24665	78857	84488	63570	74896	6926	10352	4190	10393	2.51409	2.4709	2.47694	2.82856	2.57262	5.72156	5.73209	5.52103	5.35782	5.58313	1.97906	1.91432	1.19695	1.54373	1.65852
MIR-532-3P;hsa-miR-532-3p|3x|1x	0	0	0	0	14	5	3	5	29	71	30	70	0	0	0	0	0	0.00101579	0.000339225	0.000260549	0.000357684	0.000493311	0.00828656	0.0131295	0.00857008	0.0103975	0.0100959
MIR-669A;NA	280	461	184	220	183	226	136	194	5010	7630	4977	9701	0.0328318	0.048804	0.033908	0.0252294	0.0351933	0.0132778	0.015333	0.0118115	0.0138781	0.0135751	1.43157	1.41096	1.42178	1.44095	1.42631
MIR-339-3P-hsa;NA	178	208	85	176	2306	2750	1798	2285	4683	7690	4706	9125	0.0208716	0.02202	0.015664	0.0201835	0.0196848	0.167314	0.186574	0.156156	0.163462	0.168376	1.33814	1.42206	1.34436	1.35539	1.36499
MGHV-M1-7-3P;NA	4	2	2	0	185	179	142	153	945	1438	1317	1958	0.000469025	0.000211731	0.000368565	0	0.00026233	0.0134229	0.0121443	0.0123326	0.0109451	0.0122112	0.270027	0.265919	0.376227	0.290833	0.300752
MIR-888;NA	88	244	93	124	1237	1163	1045	1153	2166	2785	2012	3696	0.0103186	0.0258312	0.0171383	0.0142202	0.0168771	0.0897519	0.0789038	0.0907578	0.082482	0.0854739	0.61892	0.515011	0.574767	0.548989	0.564422
MIR-127;hsa-miR-127-3p|1x|3x	898	1327	442	948	152016	160826	124562	154541	732	1485	1014	1802	0.105296	0.140484	0.081453	0.108716	0.108987	11.0297	10.9113	10.8182	11.0554	10.9536	0.209164	0.274611	0.289669	0.267662	0.260276
MIR-509-5P-hsa;NA	115	226	78	98	243	223	179	243	1763	2420	1693	2860	0.0134845	0.0239256	0.0143741	0.0112386	0.0157557	0.0176311	0.0151294	0.0155461	0.0173835	0.0164225	0.503765	0.447514	0.483638	0.424813	0.464933
MIR-523;NA	194	245	92	199	326	339	260	286	668	1033	925	1987	0.0227477	0.025937	0.016954	0.0228212	0.022115	0.0236533	0.0229995	0.0225809	0.0204595	0.0224233	0.190877	0.191026	0.264244	0.295141	0.235322
MIR-34A;hsa-miR-34a-5p|2x|1x	11	28	6	17	295	347	269	262	2011	3364	2102	3211	0.00128982	0.00296423	0.0011057	0.00194955	0.00182732	0.0214041	0.0235422	0.0233625	0.0187427	0.0217629	0.57463	0.622081	0.600477	0.476949	0.568534
MIR-201-rno;NA	81	159	73	100	9504	9794	8152	9419	1314	1901	1939	3704	0.00949776	0.0168326	0.0134526	0.0114679	0.0128127	0.689573	0.664475	0.707998	0.673806	0.683963	0.375467	0.351539	0.553913	0.550177	0.457774
MIR-769-5P;hsa-miR-769-5p|1x|1x	7851	10187	5400	8516	174900	186518	147450	176225	15568	25178	15636	29821	0.920579	1.07845	0.995127	0.976608	0.992691	12.6901	12.6543	12.806	12.6066	12.6892	4.44845	4.65599	4.46673	4.42949	4.50016
MIR-466C-5P-rno;NA	2019	2670	1294	1881	18661	20696	16253	18952	8816	13665	8433	15538	0.23674	0.282661	0.238462	0.215712	0.243394	1.35397	1.40412	1.41157	1.35577	1.38136	2.51911	2.52697	2.40905	2.30795	2.44077
MIR-29B;hsa-miR-29b-3p|4x|1x	16	7	7	7	33	44	23	24	1058	1607	1280	2591	0.0018761	0.000741058	0.00128998	0.000802754	0.00117747	0.00239435	0.00298518	0.00199754	0.00171688	0.00227349	0.302316	0.297171	0.365657	0.384856	0.3375
MIR-804;NA	9	17	6	9	97	111	67	101	14540	22358	13080	24855	0.00105531	0.00179971	0.0011057	0.00103211	0.00124821	0.00703794	0.0075308	0.00581892	0.00722522	0.00690322	4.15471	4.13451	3.73656	3.69186	3.92941
MIR-645;NA	2864	3911	2038	3116	4275	4738	3593	4313	2307	2752	1922	3147	0.335822	0.41404	0.375568	0.35734	0.370693	0.310177	0.32145	0.31205	0.308538	0.313054	0.65921	0.508908	0.549057	0.467442	0.546154
MIR-641;NA	453	815	296	332	23617	24954	20858	23908	4361	6703	4258	8908	0.0531171	0.0862804	0.0545477	0.0380735	0.0580047	1.71356	1.69301	1.81151	1.7103	1.73209	1.24613	1.23954	1.21638	1.32316	1.2563
MIR-649;NA	17	29	18	14	1827	1882	1643	1850	4047	6566	5071	10145	0.00199336	0.0030701	0.00331709	0.00160551	0.00249651	0.13256	0.127684	0.142694	0.132343	0.13382	1.1564	1.2142	1.44863	1.5069	1.33153
MIR-520A-5P;NA	68	116	51	58	1272	1317	1060	1269	4660	7699	5310	10473	0.00797343	0.0122804	0.00939842	0.00665139	0.00907591	0.0922914	0.0893519	0.0920605	0.0907803	0.091121	1.33156	1.42372	1.5169	1.55562	1.45695
MIR-377-rno;NA	31	20	7	18	149	162	114	178	1661	2424	1699	3304	0.00363494	0.00211731	0.00128998	0.00206423	0.00227661	0.0108109	0.0109909	0.00990085	0.0127336	0.011109	0.47462	0.448253	0.485352	0.490763	0.474747
MIR-625;hsa-miR-625-5p|1x|1x	0	1	0	0	89	94	55	94	47	78	46	72	0	0.000105865	0	0	2.64664e-05	0.0064575	0.00637744	0.00477673	0.00672446	0.00608403	0.0134299	0.014424	0.0131408	0.0106946	0.0129223
MIR-433-3P;hsa-miR-433-3p|1x|3x	3074	4883	2239	3324	3788	4426	2675	3678	1030	1303	1134	1585	0.360446	0.516941	0.412609	0.381194	0.417797	0.274843	0.300282	0.232323	0.263113	0.26764	0.294316	0.240955	0.323949	0.235429	0.273662
MIR-425;hsa-miR-425-5p|1.5x|1x	71	132	43	54	1028	999	821	1042	3086	4666	3434	7206	0.0083252	0.0139742	0.00792416	0.00619268	0.00910407	0.0745877	0.0677772	0.0713035	0.0745414	0.0720525	0.881804	0.862851	0.980989	1.07035	0.948998
MIR-763;NA	16	36	17	20	456	445	296	422	792	1467	1124	1978	0.0018761	0.00381116	0.00313281	0.00229358	0.00277841	0.0330856	0.0301911	0.0257075	0.0301886	0.0297932	0.226309	0.271282	0.321092	0.293804	0.278122
MIR-669B;NA	50	67	20	33	29	32	38	38	7320	12282	8541	15529	0.00586281	0.00709299	0.00368565	0.00378441	0.00510647	0.00210413	0.00217104	0.00330028	0.0027184	0.00257346	2.09164	2.27122	2.4399	2.30661	2.27735
MIR-598-3P;NA	507	881	376	522	1142	1253	1009	1240	891	1032	891	1278	0.0594489	0.0932675	0.0692903	0.0598625	0.0704673	0.0828591	0.0850099	0.0876312	0.0887057	0.0860515	0.254597	0.190841	0.254531	0.189829	0.22245
MIR-452-star;NA	240	204	84	143	554	653	443	571	5480	7411	5222	10283	0.0281415	0.0215966	0.0154797	0.0163991	0.0204042	0.0401961	0.0443028	0.0384744	0.0408475	0.0409552	1.56587	1.37046	1.49177	1.52739	1.48887
MIR-690;NA	8507	15169	5975	6557	6919	7434	5749	6915	4085	7777	5847	12940	0.997499	1.60587	1.10109	0.751952	1.1141	0.502016	0.50436	0.499298	0.494677	0.500088	1.16726	1.43815	1.67031	1.92205	1.54944
MIR-434-5P;NA	35365	57763	26787	41624	9482	10262	8204	9558	322	529	587	1181	4.14677	6.11511	4.93638	4.77341	4.99292	0.687977	0.696226	0.712514	0.683749	0.695117	0.0920093	0.0978243	0.167688	0.175421	0.133236
MIR-654-3P;hsa-miR-654-3p|1x|4x	710	1392	516	578	11900	12071	9879	11591	8387	11941	6805	12086	0.083252	0.147365	0.0950899	0.0662846	0.0979978	0.863418	0.818958	0.857987	0.829184	0.842387	2.39653	2.20817	1.94398	1.7952	2.08597
MIR-889;NA	8499	11038	6051	8055	32071	34750	28121	33651	5253	7155	4887	9148	0.996561	1.16854	1.11509	0.923741	1.05099	2.32695	2.35762	2.4423	2.40729	2.38354	1.50101	1.32312	1.39607	1.35881	1.39475
RLCV-1;NA	145	212	105	180	14780	15839	12277	14759	12522	20096	9453	13701	0.0170022	0.0224435	0.0193497	0.0206423	0.0198594	1.07238	1.0746	1.06625	1.05581	1.06726	3.57808	3.71621	2.70043	2.03509	3.00745
MIR-202-3P;NA	4723	5850	3093	5649	8379	7809	6584	7188	3533	6722	4182	8285	0.553801	0.619313	0.569986	0.647823	0.597731	0.607948	0.529802	0.571818	0.514207	0.555944	1.00953	1.24305	1.19467	1.23062	1.16947
MIR-883B-3P;NA	11	25	16	11	93	78	74	50	926	1585	1398	2389	0.00128982	0.00264664	0.00294852	0.00126147	0.00203661	0.00674772	0.00529192	0.00642687	0.00357684	0.00551084	0.264598	0.293103	0.399366	0.354852	0.32798
MIR-129-5P;hsa-miR-129-5p|1x|5x	36439	39917	22252	36504	3548	3836	2927	3566	4281	5906	3663	7012	4.2727	4.22583	4.10066	4.18625	4.19636	0.257429	0.260254	0.254209	0.2551	0.256748	1.22327	1.09216	1.04641	1.04153	1.10084
MIR-124;hsa-miR-124-3p|1x|4x	11	21	5	20	486	508	365	494	769	1482	973	1755	0.00128982	0.00222318	0.000921414	0.00229358	0.001682	0.0352623	0.0344653	0.0317001	0.0353392	0.0341917	0.219737	0.274056	0.277956	0.26068	0.258107
MIR-885-3P;NA	19641	21965	12278	16203	1781	1995	1472	1758	4600	6295	2859	6842	2.30303	2.32534	2.26262	1.85815	2.18728	0.129222	0.135351	0.127843	0.125762	0.129544	1.31442	1.16409	0.816729	1.01628	1.07788
MIR-805;NA	172494	155885	101070	134514	29586	30840	27601	30942	9699	14029	7649	13745	20.226	16.5028	18.6255	15.426	17.6951	2.14665	2.09234	2.39713	2.21349	2.2124	2.77142	2.59429	2.18509	2.04163	2.39811
MIR-646;NA	49650	53438	33916	64897	69601	73289	56713	68803	1976	3453	2365	4937	5.82177	5.65724	6.25013	7.44234	6.29287	5.04998	4.9723	4.9255	4.92195	4.96743	0.564629	0.638539	0.675608	0.733322	0.653024
MIR-223;hsa-miR-223-3p|1x|1x	6	7	3	1	110	111	96	105	1707	2578	2088	3956	0.000703538	0.000741058	0.000552848	0.000114679	0.000528031	0.00798117	0.0075308	0.00833756	0.00751137	0.00784023	0.487764	0.476732	0.596478	0.587608	0.537145
MIR-199B-5P-hsa;hsa-miR-199b-5p|3x|1x	1145	1412	713	1068	3713	3873	3144	3741	465	586	628	1133	0.134258	0.149482	0.131394	0.122477	0.134403	0.269401	0.262764	0.273055	0.267619	0.26821	0.132871	0.108365	0.1794	0.168291	0.147232
MIR-880-rno;NA	132	222	100	132	398	477	342	414	3668	5350	3622	6675	0.0154778	0.0235021	0.0184283	0.0151377	0.0181365	0.0288773	0.0323621	0.0297026	0.0296163	0.0301396	1.04811	0.989338	1.03469	0.991477	1.0159
MIR-301B-hsa;hsa-miR-301b|1.5x|1x	41	85	26	41	8563	9184	7462	8720	1505	2380	1557	3043	0.00480751	0.00899857	0.00479135	0.00470185	0.00582482	0.621298	0.623089	0.648071	0.623801	0.629065	0.430044	0.440117	0.444787	0.451995	0.441736
MIR-484;hsa-miR-484|1x|1.5x	623	1158	461	629	4338	4530	3367	4394	3094	5703	4201	7697	0.0730507	0.122592	0.0849543	0.0721332	0.0881826	0.314748	0.307338	0.292422	0.314333	0.307211	0.88409	1.05462	1.2001	1.14328	1.07052
MIR-369-3P;hsa-miR-369-3p|4x|1x	34	59	21	26	279	335	249	250	2240	2662	1857	3241	0.00398671	0.00624606	0.00386994	0.00298166	0.00427109	0.0202432	0.0227281	0.0216255	0.0178842	0.0206203	0.640065	0.492265	0.530488	0.481405	0.536056
MIR-669C;NA	28135	21809	15645	26796	151	172	107	141	8840	12891	7003	13231	3.29901	2.30882	2.8831	3.07294	2.89097	0.010956	0.0116694	0.0092929	0.0100867	0.0105012	2.52597	2.38384	2.00054	1.96528	2.21891
MIR-295-3P-mmu;NA	7	15	7	8	1924	1992	1757	2064	2640	4249	2956	5391	0.000820794	0.00158798	0.00128998	0.000917434	0.00115405	0.139598	0.135147	0.152595	0.147652	0.143748	0.754362	0.785738	0.844439	0.800757	0.796324
MIR-691;NA	0	1	0	1	71	84	85	110	2669	3982	2740	5364	0	0.000105865	0	0.000114679	5.51362e-05	0.00515149	0.00569899	0.00738221	0.00786905	0.00652543	0.762649	0.736364	0.782734	0.796746	0.769623
MIR-325-5P;NA	3295	4950	2328	3732	497	536	353	432	833	1039	951	1626	0.386359	0.524034	0.42901	0.427983	0.441847	0.0360604	0.036365	0.0306579	0.0309039	0.0334968	0.238024	0.192135	0.271672	0.241519	0.235838
EBV-20-3P;NA	0	0	0	1	0	0	1	0	3	2	2	4	0	0	0	0.000114679	2.86698e-05	0	0	8.68496e-05	0	2.17124e-05	0.00085723	0.000369846	0.000571339	0.000594143	0.00059814
MIR-293-3P;NA	174	244	108	165	305	309	257	285	5156	7892	5355	11379	0.0204026	0.0258312	0.0199025	0.0189221	0.0212646	0.0221296	0.0209641	0.0223203	0.020388	0.0214505	1.47329	1.45941	1.52976	1.69019	1.53816
RLCV-2;NA	845	1604	544	957	301	324	253	306	2910	3585	2832	5189	0.0990816	0.169808	0.10025	0.109748	0.119722	0.0218394	0.0219818	0.0219729	0.0218903	0.0219211	0.831513	0.662949	0.809016	0.770753	0.768558
MIR-130A;hsa-miR-130a-3p|8x|1x	0	0	0	0	256	266	212	277	2077	3568	2441	4152	0	0	0	0	0	0.0185744	0.0180468	0.0184121	0.0198157	0.0187122	0.593489	0.659805	0.697319	0.616721	0.641834
MIR-182-star;NA	113	216	76	89	47	48	49	55	6147	10237	7038	13108	0.01325	0.0228669	0.0140055	0.0102064	0.0150822	0.00341014	0.00325656	0.00425563	0.00393453	0.00371421	1.75646	1.89306	2.01054	1.94701	1.90177
MIR-221;hsa-miR-221-3p|10x|1x	103	179	82	97	381	412	288	383	2079	3177	2059	4065	0.0120774	0.0189499	0.0151112	0.0111239	0.0143156	0.0276439	0.0279522	0.0250127	0.0273986	0.0270018	0.59406	0.587501	0.588193	0.603798	0.593388
MIR-764-5P;NA	93	144	87	108	59	67	53	56	1383	2778	2336	4231	0.0109048	0.0152446	0.0160326	0.0123854	0.0136419	0.00428081	0.00454562	0.00460303	0.00400606	0.00435888	0.395183	0.513716	0.667324	0.628455	0.55117
MIR-611;NA	0	1	0	1	77	87	53	78	1350	2491	1373	2289	0	0.000105865	0	0.000114679	5.51362e-05	0.00558682	0.00590252	0.00460303	0.00557987	0.00541806	0.385753	0.460643	0.392224	0.339999	0.394655
MIR-290-5P-rno;NA	14	28	7	12	50	39	27	45	1180	1798	1743	3180	0.00164159	0.00296423	0.00128998	0.00137615	0.00181799	0.00362781	0.00264596	0.00234494	0.00321916	0.00295947	0.337177	0.332492	0.497922	0.472344	0.409984
RLCV-12-3P;NA	4202	5461	2874	4511	1614	1698	1368	1701	1782	2590	1893	2880	0.492711	0.578131	0.529629	0.517318	0.529447	0.117106	0.115201	0.11881	0.121684	0.1182	0.509195	0.478951	0.540772	0.427783	0.489175
KSHV-K12-9-star;NA	0	0	0	0	0	0	0	0	8	4	10	16	0	0	0	0	0	0	0	0	0	0	0.00228595	0.000739692	0.00285669	0.00237657	0.00206473
MIR-452;NA	530	972	387	529	542	622	425	590	4032	5654	3840	6908	0.0621458	0.102901	0.0713174	0.0606653	0.0742574	0.0393254	0.0421996	0.0369111	0.0422067	0.0401607	1.15212	1.04555	1.09697	1.02609	1.08018
LET-7G;hsa-let-7g-5p|8x|1x	1284	1796	817	1181	1635	1706	1384	1621	3774	5801	3634	7374	0.150557	0.190134	0.150559	0.135436	0.156672	0.118629	0.115744	0.1202	0.115961	0.117633	1.0784	1.07274	1.03812	1.0953	1.07114
MIR-422A;NA	2169	3046	1442	2406	21007	22329	17661	20610	4482	7354	4773	10154	0.254329	0.322466	0.265736	0.275918	0.279612	1.52419	1.51491	1.53385	1.47437	1.51183	1.2807	1.35992	1.3635	1.50823	1.37809
MIR-502-3P;hsa-miR-502-3p|1x|1x	299	553	200	283	485	502	416	477	1457	2526	1856	3456	0.0350596	0.0585436	0.0368565	0.0324542	0.0407285	0.0351897	0.0340582	0.0361294	0.0341231	0.0348751	0.416328	0.467116	0.530202	0.51334	0.481746
MIR-509-3-5P;NA	66750	76792	40866	69450	7047	8160	5872	6864	4719	5889	3960	7094	7.82686	8.12962	7.5309	7.96447	7.86296	0.511303	0.553616	0.509981	0.491029	0.516482	1.34842	1.08901	1.13125	1.05371	1.1556
MIR-296-5P;hsa-miR-296-5p|1x|3x	3	5	0	2	85	68	39	59	987	1862	1366	2542	0.000351769	0.000529327	0	0.000229358	0.000277614	0.00616727	0.00461346	0.00338713	0.00422067	0.00459714	0.282029	0.344327	0.390224	0.377578	0.348539
MIR-513A-5P;NA	12	28	14	23	338	395	324	387	5283	8079	4723	8285	0.00140708	0.00296423	0.00257996	0.00263762	0.00239722	0.024524	0.0267988	0.0281393	0.0276848	0.0267867	1.50958	1.49399	1.34922	1.23062	1.39585
MIR-512-5P;NA	1	4	7	5	351	343	271	322	2609	4431	3052	6282	0.000117256	0.000423462	0.00128998	0.000573396	0.000601023	0.0254672	0.0232709	0.0235362	0.0230349	0.0238273	0.745504	0.819394	0.871863	0.933102	0.842466
MIR-142-3P;hsa-miR-142-3p|1x|1x	64	102	40	52	286	318	240	281	5910	8101	5790	11925	0.0075044	0.0107983	0.00737131	0.00596332	0.00790933	0.0207511	0.0215747	0.0208439	0.0201019	0.0208179	1.68874	1.49806	1.65403	1.77129	1.65303
MIR-290-3P-rno;NA	140	225	89	120	329	326	258	271	3558	5558	3569	7735	0.0164159	0.0238197	0.0164012	0.0137615	0.0175996	0.023871	0.0221175	0.0224072	0.0193865	0.0219455	1.01667	1.0278	1.01955	1.14892	1.05324
MIR-570;NA	24	39	17	13	199	182	195	195	4306	7188	4883	9362	0.00281415	0.00412875	0.00313281	0.00149083	0.00289164	0.0144387	0.0123478	0.0169357	0.0139497	0.014418	1.23041	1.32923	1.39492	1.39059	1.33629
MIR-524-3P;NA	7	9	3	3	82	75	53	67	2581	4313	2893	5327	0.000820794	0.000952789	0.000552848	0.000344038	0.000667617	0.0059496	0.00508838	0.00460303	0.00479297	0.00510849	0.737503	0.797573	0.826442	0.791251	0.788192
MIR-768-3P;NA	2675	3321	1532	2808	6557	7018	5498	6642	2148	2861	2098	5067	0.313661	0.351579	0.282321	0.322019	0.317395	0.475751	0.476137	0.477499	0.475148	0.476133	0.613777	0.529065	0.599334	0.752631	0.623702
MIR-18A;hsa-miR-18a-5p|1x|4x	19	28	9	30	139	149	145	169	4080	6566	4049	7590	0.00222787	0.00296423	0.00165854	0.00344038	0.00257276	0.0100853	0.0101089	0.0125932	0.0120897	0.0112193	1.16583	1.2142	1.15668	1.12739	1.16603
MIR-450A-5P;hsa-miR-450a-5p|1x|4x	102	215	81	118	602	650	544	593	2929	3800	2842	5342	0.0119601	0.0227611	0.0149269	0.0135321	0.0157951	0.0436788	0.0440993	0.0472462	0.0424214	0.0443614	0.836942	0.702708	0.811872	0.793479	0.78625
MIR-508-5P;NA	6651	8484	4065	6202	4810	5831	3944	4749	8282	11796	7338	15332	0.779872	0.898163	0.749109	0.71124	0.784596	0.348995	0.395605	0.342535	0.339728	0.356716	2.36653	2.18135	2.09624	2.27735	2.23037
KSHV-K12-4-5P;NA	5393	7035	3338	5293	14743	16372	11658	14448	4533	6654	4633	9349	0.632363	0.744764	0.615136	0.606997	0.649815	1.06969	1.11076	1.01249	1.03356	1.05663	1.29527	1.23048	1.32351	1.38866	1.30948
MIR-340-5P;hsa-miR-340-5p|2x|1x	157	263	98	141	1492	1683	1321	1516	2560	3928	2689	4552	0.0184092	0.0278426	0.0180597	0.0161698	0.0201203	0.108254	0.114183	0.114728	0.10845	0.111404	0.731503	0.726378	0.768165	0.676135	0.725545
MIR-692;NA	468	788	327	417	112345	111034	92201	111123	1822	3671	3029	7009	0.0548759	0.083422	0.0602604	0.0478212	0.0615949	8.15132	7.53311	8.00762	7.94939	7.91036	0.520624	0.678852	0.865293	1.04109	0.776464
MIR-696;NA	193593	151432	118671	250314	3217	3347	2355	2916	6693	10358	5479	9889	22.7	16.0314	21.869	28.7058	22.3266	0.233413	0.227077	0.204531	0.208601	0.218406	1.91248	1.91543	1.56518	1.46887	1.71549
RLCV-7;NA	43	59	20	38	13125	13858	10816	12875	2496	4824	3435	6335	0.00504202	0.00624606	0.00368565	0.00435781	0.00483289	0.952299	0.940197	0.939365	0.921037	0.938224	0.713215	0.892069	0.981274	0.940975	0.881883
RLCV-3;NA	48893	61512	32132	42618	230191	244034	177049	231896	1308	2245	1887	3896	5.73301	6.512	5.92137	4.8874	5.76344	16.7018	16.5565	15.3766	16.5891	16.306	0.373752	0.415152	0.539058	0.578696	0.476665
MIR-324-3P;NA	2	0	1	1	0	1	7	5	836	1568	1031	2046	0.000234513	0	0.000184283	0.000114679	0.000133369	0	6.78451e-05	0.000607947	0.000357684	0.000258369	0.238881	0.289959	0.294525	0.303904	0.281818
MIR-548B-3P;NA	6	7	1	1	285	389	311	306	1632	3071	2171	3938	0.000703538	0.000741058	0.000184283	0.000114679	0.00043589	0.0206785	0.0263917	0.0270102	0.0218903	0.0239927	0.466333	0.567899	0.620188	0.584934	0.559839
MIR-432;hsa-miR-432-5p|10x|1x	11569	11694	6688	12465	5262	5679	4478	5497	2752	3428	2472	4546	1.35654	1.23799	1.23248	1.42948	1.31412	0.38179	0.385292	0.388912	0.393238	0.387308	0.786366	0.633916	0.706175	0.675244	0.700425
MIR-612;NA	0	0	0	0	0	0	0	0	1	1	0	5	0	0	0	0	0	0	0	0	0	0	0.000285743	0.000184923	0	0.000742679	0.000303336
MIR-885-5P;hsa-miR-885-5p|1x|10x	544	904	356	535	766	747	528	688	462	667	639	1291	0.0637874	0.0957024	0.0656046	0.0613534	0.071612	0.055578	0.0506803	0.0458566	0.0492174	0.050333	0.132013	0.123344	0.182543	0.19176	0.157415
MIR-298;NA	303	502	226	297	75815	81508	64036	76348	781	1435	957	2243	0.0355287	0.0531445	0.0416479	0.0340597	0.0410952	5.50084	5.52992	5.5615	5.4617	5.51349	0.223166	0.265365	0.273386	0.333166	0.27377
MIR-193B;hsa-miR-193b-3p|10x|1x	0	0	0	0	43	49	33	38	103	178	182	304	0	0	0	0	0	0.00311991	0.00332441	0.00286604	0.0027184	0.00300719	0.0294316	0.0329163	0.0519918	0.0451549	0.0398736
MIR-876-5P-hsa;NA	1	0	1	0	0	1	1	1	2728	4828	3561	6720	0.000117256	0	0.000184283	0	7.53848e-05	0	6.78451e-05	8.68496e-05	7.15368e-05	5.65579e-05	0.779508	0.892808	1.01727	0.998161	0.921937
MIR-571;NA	21655	22942	12721	18389	45696	47292	36798	46273	2571	4587	3208	5871	2.53918	2.42877	2.34426	2.10884	2.35526	3.31552	3.20853	3.19589	3.31022	3.25754	0.734646	0.848242	0.916427	0.872054	0.842842
MIR-579;NA	16	26	12	13	80	84	71	66	572	773	765	1384	0.0018761	0.0027525	0.00221139	0.00149083	0.00208271	0.00580449	0.00569899	0.00616632	0.00472143	0.00559781	0.163445	0.142946	0.218537	0.205574	0.182625
MIR-575;NA	12931	15713	9215	16266	264351	284511	221513	267666	6566	10578	6244	12370	1.51624	1.66346	1.69817	1.86537	1.68581	19.1803	19.3027	19.2383	19.148	19.2173	1.87619	1.95612	1.78372	1.83739	1.86335
MIR-371-3P;NA	420	461	227	443	2788	3094	2282	2823	3254	5017	3655	7832	0.0492476	0.048804	0.0418322	0.0508029	0.0476717	0.202286	0.209913	0.198191	0.201949	0.203085	0.929809	0.927759	1.04412	1.16333	1.01626
HCMV-UL70-3P;NA	10756	10748	6080	10207	3291	3764	2415	3104	1551	2489	936	1999	1.26121	1.13784	1.12044	1.17053	1.17251	0.238782	0.255369	0.209742	0.22205	0.231486	0.443188	0.460273	0.267387	0.296923	0.366943
MIR-337-5P-hsa;NA	0	1	0	0	8	6	6	10	596	1123	810	1342	0	0.000105865	0	0	2.64664e-05	0.000580449	0.00040707	0.000521097	0.000715368	0.000555996	0.170303	0.207669	0.231392	0.199335	0.202175
MIR-547-mmu;NA	2987	4247	2110	3236	2082	2125	1622	2080	319	424	484	839	0.350245	0.449611	0.388837	0.371102	0.389948	0.151062	0.144171	0.14087	0.148797	0.146225	0.0911521	0.0784074	0.138264	0.124622	0.108111
HCMV-US33-5P;NA	346	513	201	253	442	482	345	388	1365	2268	1424	2844	0.0405707	0.054309	0.0370408	0.0290138	0.0402336	0.0320698	0.0327013	0.0299631	0.0277563	0.0306226	0.39004	0.419405	0.406793	0.422436	0.409669
MIR-207-rno;NA	719	1160	525	610	263	297	230	283	3663	5900	3491	7257	0.0843073	0.122804	0.0967484	0.0699543	0.0934535	0.0190823	0.02015	0.0199754	0.0202449	0.0198631	1.04668	1.09105	0.997272	1.07792	1.05323
MIR-302C-star-hsa;NA	151	256	107	166	82	114	75	97	2877	3634	2468	4440	0.0177057	0.0271016	0.0197183	0.0190367	0.0208906	0.0059496	0.00773434	0.00651372	0.00693907	0.00678418	0.822084	0.67201	0.705032	0.659499	0.714656
MIR-697;NA	4223	7393	3050	4651	9120	10048	7827	9185	5948	8228	5603	10807	0.495173	0.782664	0.562062	0.533373	0.593318	0.661712	0.681707	0.679772	0.657066	0.670064	1.6996	1.52155	1.60061	1.60523	1.60675
MIR-876-3P-hsa;NA	9	12	13	9	30	30	14	20	4560	7221	4024	7264	0.00105531	0.00127039	0.00239568	0.00103211	0.00143837	0.00217668	0.00203535	0.00121589	0.00143074	0.00171467	1.30299	1.33533	1.14953	1.07896	1.2167
RLCV-8;NA	4	6	2	5	39	48	37	37	2693	4224	3031	5602	0.000469025	0.000635193	0.000368565	0.000573396	0.000511545	0.00282969	0.00325656	0.00321343	0.00264686	0.00298664	0.769507	0.781115	0.865864	0.832098	0.812146
MIR-336;NA	328	440	191	245	40	43	32	39	122	308	257	609	0.0384601	0.0465808	0.035198	0.0280964	0.0370838	0.00290225	0.00291734	0.00277919	0.00278994	0.00284718	0.0348607	0.0569563	0.073417	0.0904583	0.0639231
MIR-337-3P-hsa;NA	792	1108	486	530	1505	1336	1246	1410	4686	6238	4697	9294	0.092867	0.117299	0.0895614	0.06078	0.0901268	0.109197	0.090641	0.108215	0.100867	0.10223	1.33899	1.15355	1.34179	1.38049	1.30371
MIR-886-5P;NA	12309	14179	7464	12872	13642	14565	10176	13280	10013	15487	7846	15762	1.44331	1.50107	1.37549	1.47615	1.449	0.989811	0.988163	0.883781	0.950009	0.952941	2.86115	2.8639	2.24136	2.34122	2.57691
MIR-613;NA	156	268	121	168	1651	1831	1490	1667	1442	2353	2000	4441	0.018292	0.028372	0.0222982	0.0192661	0.0220571	0.11979	0.124224	0.129406	0.119252	0.123168	0.412042	0.435124	0.571339	0.659648	0.519538
MIR-509-5P-mmu;NA	27	60	19	19	160	162	107	133	1400	2244	1800	3570	0.00316592	0.00635193	0.00350137	0.0021789	0.00379953	0.011609	0.0109909	0.0092929	0.0095144	0.0103518	0.400041	0.414967	0.514205	0.530273	0.464871
MIR-617;NA	41	59	17	40	23	32	22	33	4133	6899	4421	9414	0.00480751	0.00624606	0.00313281	0.00458717	0.00469339	0.00166879	0.00217104	0.00191069	0.00236072	0.00202781	1.18098	1.27578	1.26294	1.39832	1.27951
MIR-516A-5P;NA	373	742	286	373	6766	7082	5960	6833	6143	9725	6868	14258	0.0437366	0.0785522	0.0527049	0.0427753	0.0544422	0.490915	0.480479	0.517623	0.488811	0.494457	1.75532	1.79838	1.96198	2.11782	1.90837
MIR-875-3P-rno;NA	67	107	40	51	579	646	501	548	3419	4965	3132	5752	0.00785617	0.0113276	0.00737131	0.00584864	0.00810093	0.04201	0.0438279	0.0435116	0.0392022	0.0421379	0.976956	0.918143	0.894717	0.854378	0.911049
MIR-28-3P-mmu;NA	9424	14314	6869	9739	8250	8400	6638	8191	3987	4721	3152	5964	1.10502	1.51536	1.26584	1.11686	1.25077	0.598588	0.569899	0.576507	0.585958	0.582738	1.13926	0.873022	0.90043	0.885868	0.949645
MIR-542-5P;NA	11	12	4	2	1658	1821	1352	1564	5230	7914	4141	7645	0.00128982	0.00127039	0.000737131	0.000229358	0.000881674	0.120298	0.123546	0.117421	0.111884	0.118287	1.49444	1.46348	1.18296	1.13556	1.31911
MIR-19A;hsa-miR-19a-3p|1x|1x	0	3	1	5	225	212	173	192	5260	8109	5412	10416	0	0.000317596	0.000184283	0.000573396	0.000268819	0.0163251	0.0143832	0.015025	0.0137351	0.0148671	1.50301	1.49954	1.54604	1.54715	1.52394
MIR-454-star;NA	9858	13074	6381	11049	87730	87400	72813	88473	3016	4746	3848	9602	1.15591	1.38409	1.17591	1.26709	1.24575	6.36535	5.92966	6.32378	6.32908	6.23697	0.861802	0.877645	1.09926	1.42624	1.06624
MIR-572;NA	594	934	425	694	1974	2101	1615	1974	1135	2325	1818	3536	0.0696502	0.0988784	0.0783202	0.0795874	0.081609	0.143226	0.142542	0.140262	0.141214	0.141811	0.324319	0.429946	0.519347	0.525223	0.449709
MIR-509-3P-mmu;NA	7678	10566	5040	6639	1783	1954	1487	1710	5795	8772	5590	10559	0.900294	1.11857	0.928785	0.761355	0.927252	0.129368	0.132569	0.129145	0.122328	0.128353	1.65588	1.62214	1.59689	1.56839	1.61083
MIR-125B;hsa-miR-125b-5p|2x|1x	94	144	65	100	1113	1136	775	1049	260	421	561	1043	0.0110221	0.0152446	0.0119784	0.0114679	0.0124283	0.080755	0.077072	0.0673084	0.0750422	0.0750444	0.0742933	0.0778526	0.160261	0.154923	0.116832
MIR-211;NA	767	1203	518	694	2840	3072	2447	2927	1893	2825	2549	4875	0.0899356	0.127356	0.0954584	0.0795874	0.0980844	0.206059	0.20842	0.212521	0.209388	0.209097	0.540912	0.522408	0.728171	0.724112	0.628901
MIR-215;NA	11373	16407	7739	10913	19223	19225	16661	19564	6278	8929	5405	10073	1.33356	1.73694	1.42616	1.25149	1.43704	1.39475	1.30432	1.447	1.39955	1.3864	1.7939	1.65118	1.54404	1.4962	1.62133
MIR-133B;hsa-miR-133b|2x|1x	0	0	1	1	24	22	28	23	576	1017	938	1643	0	0	0.000184283	0.000114679	7.47405e-05	0.00174135	0.00149259	0.00243179	0.00164535	0.00182777	0.164588	0.188067	0.267958	0.244044	0.216164
MIR-629;hsa-miR-629-5p|1x|8x	31803	37924	21770	36404	3475	4084	3077	3559	10806	19253	10761	21134	3.7291	4.01484	4.01183	4.17478	3.98264	0.252133	0.277079	0.267236	0.2546	0.262762	3.08774	3.56032	3.07409	3.13916	3.21533
MIR-20A;hsa-miR-20a-5p|8x|1x	71	137	38	83	52	70	41	48	323	439	343	638	0.0083252	0.0145036	0.00700274	0.00951837	0.00983747	0.00377292	0.00474915	0.00356083	0.00343377	0.00387917	0.0922951	0.0811812	0.0979846	0.0947659	0.0915567
MIR-694;NA	16944	23697	10821	15950	51509	53113	41241	50954	3085	4125	2777	5284	1.98679	2.50869	1.99412	1.82913	2.07969	3.73729	3.60345	3.58176	3.64509	3.6419	0.881518	0.762808	0.793304	0.784864	0.805623
MIR-698;NA	689	1311	500	522	20301	20559	17504	20856	10063	14965	9078	16482	0.0807896	0.13879	0.0921414	0.0598625	0.0928958	1.47296	1.39483	1.52021	1.49197	1.46999	2.87543	2.76737	2.59331	2.44817	2.67107
MIR-27A;hsa-miR-27a-3p|1x|3x	14	17	3	5	228	248	205	269	1237	1958	1584	2962	0.00164159	0.00179971	0.000552848	0.000573396	0.00114189	0.0165428	0.0168256	0.0178042	0.0192434	0.017604	0.353464	0.362079	0.4525	0.439963	0.402002
RLCV-9;NA	111	163	56	46	2448	2532	1873	2275	4759	6138	4641	9223	0.0130154	0.0172561	0.0103198	0.00527524	0.0114666	0.177617	0.171784	0.162669	0.162746	0.168704	1.35985	1.13506	1.32579	1.36995	1.29766
MIR-333;NA	23215	31716	15587	20082	54	44	37	51	2375	3870	2448	4388	2.7221	3.35763	2.87241	2.30299	2.81378	0.00391803	0.00298518	0.00321343	0.00364838	0.00344126	0.67864	0.715652	0.699319	0.651775	0.686347
MIR-423-5P;hsa-miR-423-5p|1x|1x	14105	14372	8245	12884	70726	75053	60490	73454	1573	2432	1301	3228	1.6539	1.5215	1.51941	1.47753	1.54308	5.1316	5.09198	5.25353	5.25467	5.18294	0.449474	0.449733	0.371656	0.479474	0.437584
MIR-741-3P;NA	11476	16001	8007	12205	6499	6049	4857	5684	1998	3516	2875	6051	1.34563	1.69395	1.47555	1.39966	1.4787	0.471542	0.410395	0.421828	0.406615	0.427595	0.570915	0.650189	0.8213	0.898791	0.735299
EBV-17-5P;NA	12980	14327	7610	9039	27340	30613	24243	28973	2058	2994	1816	3409	1.52199	1.51673	1.40239	1.03659	1.36942	1.98368	2.07694	2.10549	2.07264	2.05969	0.58806	0.55366	0.518776	0.506359	0.541713
MIR-743A-mmu;NA	786	1490	587	815	518	562	429	546	1663	2261	1662	3260	0.0921634	0.15774	0.108174	0.0934635	0.112885	0.0375841	0.0381289	0.0372585	0.0390591	0.0380076	0.475191	0.418111	0.474783	0.484227	0.463078
MIR-614;NA	0	0	0	0	2	0	0	0	1073	2050	1402	2123	0	0	0	0	0	0.000145112	0	0	0	3.62781e-05	0.306603	0.379092	0.400509	0.315342	0.350386
MIR-496_3;NA	9	11	4	6	114	140	103	111	4458	7827	5313	9770	0.00105531	0.00116452	0.000737131	0.000688075	0.000911258	0.0082714	0.00949831	0.00894551	0.00794059	0.00866395	1.27384	1.44739	1.51776	1.4512	1.42255
MIR-610;NA	733	1431	516	835	677	713	570	712	10537	16168	9317	18288	0.0859489	0.151494	0.0950899	0.0957571	0.107072	0.0491205	0.0483735	0.0495043	0.0509342	0.0494831	3.01088	2.98984	2.66158	2.71642	2.84468
MIR-618;NA	1176	1765	871	1425	634	750	523	683	1580	2533	1681	3427	0.137893	0.186853	0.16051	0.163418	0.162169	0.0460006	0.0508838	0.0454223	0.0488597	0.0477916	0.451474	0.46841	0.48021	0.509032	0.477282
MIR-693-3P;NA	0	0	1	0	34	43	13	41	72	116	64	127	0	0	0.000184283	0	4.60707e-05	0.00246691	0.00291734	0.00112904	0.00293301	0.00236158	0.0205735	0.0214511	0.0182828	0.0188641	0.0197929
RLCV-5-3P;NA	0	0	0	0	11	12	10	11	3054	5370	3826	7581	0	0	0	0	0	0.000798117	0.000814141	0.000868496	0.000786905	0.000816915	0.87266	0.993037	1.09297	1.12605	1.02118
HCMV-UL148D;NA	83	147	60	71	3164	3043	2378	2725	3536	6498	3846	7311	0.00973227	0.0155622	0.011057	0.00814222	0.0111234	0.229568	0.206453	0.206528	0.194938	0.209372	1.01039	1.20163	1.09868	1.08595	1.09916
MIR-216A;NA	62	99	45	78	355	366	233	277	1876	3302	2151	3899	0.00726989	0.0104807	0.00829272	0.00894498	0.00874707	0.0257574	0.0248313	0.0202359	0.0198157	0.0226601	0.536054	0.610616	0.614475	0.579141	0.585072
MIR-181A;hsa-miR-181a-2-5p|10x|1x	518	841	385	539	98980	106659	86074	99213	3719	5220	3425	6486	0.0607388	0.0890329	0.0709488	0.0618121	0.0706331	7.18161	7.23629	7.47549	7.09739	7.24769	1.06268	0.965298	0.978418	0.963404	0.99245
MIR-467E;NA	196	374	126	150	177	184	147	205	3103	4281	3101	5620	0.0229822	0.0395937	0.0232196	0.0172019	0.0257494	0.0128424	0.0124835	0.0127669	0.0146651	0.0131895	0.886661	0.791656	0.885861	0.834772	0.849737
MIR-301B;NA	47	89	28	60	14754	15682	12712	15270	3434	4937	3515	6724	0.00551105	0.00942203	0.00515992	0.00688075	0.00674344	1.07049	1.06395	1.10403	1.09237	1.08271	0.981243	0.912965	1.00413	0.998755	0.974273
MIR-489-rno;NA	0	0	0	0	83	94	72	72	1578	2703	2104	4280	0	0	0	0	0	0.00602216	0.00637744	0.00625317	0.00515065	0.00595085	0.450903	0.499847	0.601048	0.635734	0.546883
MIR-520D-3P;NA	350	450	253	301	8191	9700	6024	7881	12889	19820	11122	21978	0.0410397	0.0476395	0.0466235	0.0345184	0.0424553	0.594307	0.658097	0.523182	0.563782	0.584842	3.68295	3.66517	3.17722	3.26452	3.44746
MIR-126-3P;hsa-miR-126-3p|2x|1x	5391	6869	3380	5274	1044	1228	804	936	7510	11761	7383	14845	0.632129	0.72719	0.622876	0.604818	0.646753	0.0757486	0.0833137	0.0698271	0.0669585	0.073962	2.14593	2.17488	2.1091	2.20502	2.15873
MIR-525-5P;NA	128	179	78	124	2190	2326	1855	2221	5826	9736	6565	12872	0.0150088	0.0189499	0.0143741	0.0142202	0.0156382	0.158898	0.157808	0.161106	0.158883	0.159174	1.66474	1.80041	1.87542	1.91195	1.81313
MIR-573;NA	74	95	30	54	1465	1511	1192	1444	1052	1459	1069	2181	0.00867697	0.0100572	0.00552848	0.00619268	0.00761384	0.106295	0.102514	0.103525	0.103299	0.103908	0.300602	0.269803	0.305381	0.323957	0.299936
MIR-107;hsa-miR-107|1x|8x	5	9	3	9	287	293	261	276	591	869	722	1233	0.000586281	0.000952789	0.000552848	0.00103211	0.000781008	0.0208236	0.0198786	0.0226677	0.0197442	0.0207785	0.168874	0.160698	0.206253	0.183145	0.179743
MIR-577;NA	99	177	70	94	22002	23142	18998	23587	232	331	197	245	0.0116084	0.0187382	0.0128998	0.0107798	0.0135065	1.59638	1.57007	1.64997	1.68734	1.62594	0.0662924	0.0612095	0.0562769	0.0363913	0.0550425
MIR-212;NA	0	3	3	6	1298	1304	977	1110	2510	3959	2894	5442	0	0.000317596	0.000552848	0.000688075	0.00038963	0.0941779	0.08847	0.084852	0.0794059	0.0867264	0.717216	0.73211	0.826727	0.808332	0.771096
MIR-699;NA	308	467	188	264	8470	8853	6286	8107	7528	13031	7150	12595	0.0361149	0.0494392	0.0346452	0.0302753	0.0376186	0.61455	0.600632	0.545936	0.579949	0.585267	2.15108	2.40973	2.04254	1.87081	2.11854
MIR-695;NA	4340	6227	3180	4771	75094	79526	65484	77594	16462	24672	12984	25488	0.508892	0.659224	0.586019	0.547134	0.575318	5.44853	5.39545	5.68726	5.55083	5.52052	4.70391	4.56242	3.70913	3.78588	4.19034
MIR-548C-5P;NA	4	5	2	6	862	824	758	839	3640	5169	4136	8098	0.000469025	0.000529327	0.000368565	0.000688075	0.000513748	0.0625434	0.0559043	0.065832	0.0600194	0.0610748	1.04011	0.955867	1.18153	1.20284	1.09509
MIR-337-3P;NA	2	1	2	0	2215	2227	1730	2172	335	524	451	774	0.000234513	0.000105865	0.000368565	0	0.000177236	0.160712	0.151091	0.15025	0.155378	0.154358	0.095724	0.0968997	0.128837	0.114967	0.109107
MIR-299-3P-hsa;hsa-miR-299-3p|1x|3x	35	62	29	40	1856	1975	1511	1848	2544	4046	2719	4797	0.00410397	0.00656366	0.0053442	0.00458717	0.00514975	0.134664	0.133994	0.13123	0.1322	0.133022	0.726931	0.748199	0.776735	0.712527	0.741098
MIR-619;NA	0	0	0	0	18	10	7	13	550	973	442	886	0	0	0	0	0	0.00130601	0.000678451	0.000607947	0.000929979	0.000880597	0.157159	0.17993	0.126266	0.131603	0.148739
MIR-216B;NA	4705	7692	3390	3651	3878	4054	2577	3448	11083	16553	9441	18643	0.551691	0.814317	0.624718	0.418694	0.602355	0.281373	0.275044	0.223811	0.246659	0.256722	3.16689	3.06103	2.697	2.76915	2.92352
MIR-493-star;NA	15171	18534	10191	16422	6457	6901	5591	6537	13598	19383	11977	22870	1.7789	1.96211	1.87803	1.88326	1.87557	0.468495	0.468199	0.485576	0.467636	0.472477	3.88554	3.58436	3.42146	3.39702	3.57209
MIR-541-5P-hsa;NA	96	156	78	101	19541	20625	15875	19278	2513	3934	2645	5090	0.0112566	0.016515	0.0143741	0.0115826	0.0134321	1.41782	1.3993	1.37874	1.37909	1.39374	0.718073	0.727487	0.755596	0.756048	0.739301
MIR-297;NA	116	158	64	112	3023	3364	2581	2939	5275	8271	5267	10078	0.0136017	0.0167267	0.0117941	0.0128441	0.0137417	0.219337	0.228231	0.224159	0.210247	0.220493	1.5073	1.5295	1.50462	1.49694	1.50959
MIR-517C;NA	40	69	29	45	188	210	139	226	980	1443	1231	2121	0.00469025	0.00730472	0.0053442	0.00516056	0.00562493	0.0136406	0.0142475	0.0120721	0.0161673	0.0140319	0.280028	0.266844	0.351659	0.315045	0.303394
MIR-383;NA	8259	11760	5648	8019	19673	21252	16770	19211	9954	15168	8096	15550	0.96842	1.24498	1.04083	0.919613	1.04346	1.4274	1.44184	1.45647	1.37429	1.425	2.84429	2.80491	2.31278	2.30973	2.56793
MIR-10B;hsa-miR-10b-5p|1x|2x	68927	75673	39135	52263	382810	403607	315750	387513	998	1399	1355	2521	8.08212	8.01116	7.2119	5.99348	7.32467	27.7752	27.3827	27.4228	27.7215	27.5755	0.285172	0.258707	0.387082	0.374459	0.326355
MIR-578;NA	146437	157239	100454	158804	1600	1665	1325	1735	851	1182	861	1305	17.1707	16.6462	18.5119	18.2115	17.6351	0.11609	0.112962	0.115076	0.124116	0.117061	0.243168	0.218579	0.245961	0.193839	0.225387
MIR-20B;hsa-miR-20b-5p|1.5x|1x	96	145	71	92	78	94	69	71	526	758	609	975	0.0112566	0.0153505	0.0130841	0.0105505	0.0125604	0.00565938	0.00637744	0.00599262	0.00507912	0.00577714	0.150301	0.140172	0.173973	0.144822	0.152317
MIR-140-3P;NA	6026	9170	4299	6140	1661	1769	1337	1612	9767	13672	8304	18416	0.706586	0.970787	0.792231	0.70413	0.793434	0.120516	0.120018	0.116118	0.115317	0.117992	2.79085	2.52827	2.3722	2.73544	2.60669
MIR-384-3P;NA	446	734	267	298	1191	1169	1010	1132	1437	2326	2147	4837	0.0522963	0.0777053	0.0492035	0.0341744	0.0533449	0.0864143	0.0793109	0.0877181	0.0809797	0.0836058	0.410613	0.430131	0.613332	0.718468	0.543136
MIR-208A;hsa-miR-208a|1.5x|1x	0	0	0	0	3	4	6	6	1055	1683	1410	2790	0	0	0	0	0	0.000217668	0.00027138	0.000521097	0.000429221	0.000359842	0.301459	0.311225	0.402794	0.414415	0.357473
MIR-217;NA	4084	5923	2983	4313	2614	3105	2313	2615	1421	1747	1266	2597	0.478875	0.627041	0.549715	0.494611	0.537561	0.189662	0.210659	0.200883	0.187069	0.197068	0.406041	0.323061	0.361657	0.385748	0.369127
EBV-11-3P;NA	63	88	34	60	114	118	104	132	1803	3470	2804	5706	0.00738715	0.00931616	0.00626561	0.00688075	0.00746242	0.0082714	0.00800572	0.00903235	0.00944286	0.00868808	0.515195	0.641683	0.801017	0.847546	0.70136
MIR-654-3P-rno;NA	6886	11982	4764	4201	16321	16589	13396	16271	3503	4877	2700	5158	0.807427	1.26848	0.877923	0.481767	0.858899	1.18419	1.12548	1.16344	1.16398	1.15927	1.00096	0.90187	0.771307	0.766148	0.860071
MIR-328-3P;NA	305	598	268	375	166	184	129	167	492	957	689	1282	0.0357632	0.0633076	0.0493878	0.0430047	0.0478658	0.0120443	0.0124835	0.0112036	0.0119467	0.0119195	0.140586	0.176971	0.196826	0.190423	0.176202
HCMV-US25-2-5P;NA	20321	24419	14090	22219	1634	1883	1330	1538	2424	3288	2004	3898	2.38276	2.58513	2.59654	2.54806	2.52812	0.118557	0.127752	0.11551	0.110024	0.117961	0.692642	0.608027	0.572481	0.578993	0.613036
MIR-199A-5P;NA	1383	1912	892	1245	1538	1647	1193	1517	852	1303	1280	2705	0.162165	0.202415	0.16438	0.142776	0.167934	0.111591	0.111741	0.103612	0.108521	0.108866	0.243453	0.240955	0.365657	0.40179	0.312964
MIR-671-3P;NA	63544	73009	41448	69921	142056	151746	120568	148054	952	1817	1395	2200	7.45093	7.72913	7.63815	8.01848	7.70918	10.307	10.2952	10.4713	10.5913	10.4162	0.272028	0.336005	0.398509	0.326779	0.33333
MIR-133A-star;NA	61	101	47	53	585	621	493	562	813	1397	970	1588	0.00715263	0.0106924	0.00866129	0.006078	0.00814608	0.0424453	0.0421318	0.0428168	0.0402037	0.0418994	0.232309	0.258337	0.277099	0.235875	0.250905
MIR-767-3P;NA	13	42	8	10	3483	3731	2682	3528	5621	8536	6097	13358	0.00152433	0.00444635	0.00147426	0.00114679	0.00214793	0.252713	0.25313	0.232931	0.252382	0.247789	1.60616	1.5785	1.74173	1.98414	1.72763
MIR-486-5P;hsa-miR-486-5p|4x|1x	10991	12946	6483	10629	287518	306434	223378	288194	2749	4395	1891	2476	1.28876	1.37053	1.1947	1.21893	1.26823	20.8612	20.79	19.4003	20.6165	20.417	0.785508	0.812737	0.540201	0.367775	0.626555
LET-7E;hsa-let-7e-5p|4x|1x	3803	4472	2345	3713	9450	15699	13540	16081	6610	9450	5123	10470	0.445926	0.47343	0.432143	0.425804	0.444326	0.685655	1.0651	1.17594	1.15038	1.01927	1.88876	1.74752	1.46348	1.55517	1.66374
MIR-496_1;NA	1	5	4	4	87	119	74	81	2240	3820	2672	5682	0.000117256	0.000529327	0.000737131	0.000458717	0.000460608	0.00631238	0.00807356	0.00642687	0.00579448	0.00665182	0.640065	0.706406	0.763309	0.843981	0.73844
MIR-673-5P-rno;NA	18	20	5	15	537	500	416	482	2460	3840	3162	6681	0.00211061	0.00211731	0.000921414	0.00172019	0.00171738	0.0389626	0.0339225	0.0361294	0.0344808	0.0358738	0.702929	0.710104	0.903287	0.992368	0.827172
MIR-215-hsa;hsa-miR-215-5p|1x|3x	7481	10469	5188	8060	123170	129370	109155	127957	3466	5439	4026	8015	0.877194	1.10831	0.956059	0.924314	0.966468	8.93674	8.77712	9.48006	9.15364	9.08689	0.990386	1.0058	1.15011	1.19052	1.0842
MGHV-M1-7-5P;NA	92	127	69	76	3416	3863	2767	3280	16307	24701	14415	28549	0.0107876	0.0134449	0.0127155	0.00871562	0.0114159	0.247852	0.262085	0.240313	0.234641	0.246223	4.65962	4.56778	4.11792	4.24055	4.39647
MIR-18A-star;NA	120	188	82	103	506	576	480	514	6642	11540	8781	17557	0.0140708	0.0199027	0.0151112	0.011812	0.0152242	0.0367134	0.0390788	0.0416878	0.0367699	0.0385625	1.89791	2.13401	2.50846	2.60784	2.28706
MIR-467C;NA	2427	3030	1446	2284	4279	4986	3603	4295	5437	7797	4944	9273	0.284581	0.320772	0.266473	0.261927	0.283438	0.310468	0.338275	0.312919	0.307251	0.317228	1.55359	1.44184	1.41235	1.37737	1.44629
MIR-702;NA	9	33	12	19	1690	1701	1306	1675	1521	2893	2327	4438	0.00105531	0.00349356	0.00221139	0.0021789	0.00223479	0.12262	0.115404	0.113426	0.119824	0.117819	0.434616	0.534982	0.664753	0.659202	0.573388
MIR-376B-hsa;NA	13	8	4	4	124	98	108	149	599	716	626	1104	0.00152433	0.000846924	0.000737131	0.000458717	0.000891776	0.00899696	0.00664882	0.00937975	0.010659	0.00892113	0.17116	0.132405	0.178829	0.163984	0.161594
MIR-878-5P-mmu;NA	56051	83618	40777	52087	7420	7516	6465	7479	2095	2456	1747	2816	6.57233	8.85226	7.5145	5.9733	7.2281	0.538366	0.509924	0.561482	0.535024	0.536199	0.598632	0.454171	0.499064	0.418277	0.492536
MIR-374-star;NA	4	9	5	5	1567	1568	1322	1531	1114	1957	1853	3663	0.000469025	0.000952789	0.000921414	0.000573396	0.000729156	0.113695	0.106381	0.114815	0.109523	0.111104	0.318318	0.361894	0.529345	0.544087	0.438411
MIR-515-3P;NA	1	2	1	1	35	51	32	29	2806	4759	3278	6261	0.000117256	0.000211731	0.000184283	0.000114679	0.000156987	0.00253946	0.0034601	0.00277919	0.00207457	0.00271333	0.801796	0.880049	0.936424	0.929983	0.887063
MIR-455-5P;NA	453	715	288	453	3360	3493	2957	3500	734	1128	897	1594	0.0531171	0.0756938	0.0530734	0.0519497	0.0584585	0.243789	0.236983	0.256814	0.250379	0.246991	0.209736	0.208593	0.256245	0.236766	0.227835
MIR-200A-star;NA	231848	223186	150145	288551	31261	36662	26185	31644	4035	4897	3800	7216	27.1856	23.6277	27.6691	33.0908	27.8933	2.26818	2.48734	2.27416	2.26371	2.32335	1.15297	0.905568	1.08554	1.07183	1.05398
MIR-673-3P-rno;NA	8944	10711	5571	9948	313401	339020	264740	328827	1843	2969	1399	1440	1.04874	1.13393	1.02664	1.14083	1.08753	22.7392	23.0008	22.9926	23.5232	23.0639	0.526625	0.549037	0.399651	0.213892	0.422301
MIR-373-star;NA	115	237	78	109	269	259	193	222	4372	5865	3704	7572	0.0134845	0.0250901	0.0143741	0.0125	0.0163622	0.0195176	0.0175719	0.016762	0.0158812	0.0174332	1.24927	1.08457	1.05812	1.12471	1.12917
MIR-106A-hsa;NA	51	79	28	36	134	183	109	130	2593	3719	2616	4922	0.00598007	0.00836337	0.00515992	0.00412845	0.00590795	0.00972252	0.0124156	0.0094666	0.00929979	0.0102261	0.740932	0.687729	0.747311	0.731094	0.726766
MIR-501-3P-hsa;hsa-miR-501-3p|3x|1x	3003	4245	1962	2746	14860	13649	10441	12974	362	745	321	470	0.352121	0.449399	0.361563	0.314909	0.369498	1.07818	0.926017	0.906796	0.928119	0.959779	0.103439	0.137768	0.0916999	0.0698119	0.10068
MIR-661;NA	5	3	0	5	322	365	249	344	413	666	560	980	0.000586281	0.000317596	0	0.000573396	0.000369318	0.0233631	0.0247634	0.0216255	0.0246087	0.0235902	0.118012	0.123159	0.159975	0.145565	0.136678
MIR-665;NA	40	70	42	53	6709	7062	5482	6722	2123	3827	2296	5093	0.00469025	0.00741058	0.00773987	0.006078	0.00647968	0.486779	0.479122	0.476109	0.480871	0.48072	0.606633	0.7077	0.655897	0.756493	0.681681
MIR-188-3P;hsa-miR-188-3p|1x|8x	4	13	1	4	2429	2666	2026	2568	1690	2994	2195	4719	0.000469025	0.00137625	0.000184283	0.000458717	0.000622069	0.176239	0.180875	0.175957	0.183707	0.179194	0.482906	0.55366	0.627044	0.700941	0.591138
MIR-878-3P-mmu;NA	138	301	102	154	191	230	183	229	6622	10556	7120	15443	0.0161814	0.0318655	0.0187968	0.0176606	0.0211261	0.0138582	0.0156044	0.0158935	0.0163819	0.0154345	1.89219	1.95205	2.03397	2.29384	2.04301
MIR-503-hsa;NA	10	22	4	3	5	11	6	8	3388	6118	4159	7228	0.00117256	0.00232904	0.000737131	0.000344038	0.00114569	0.000362781	0.000746296	0.000521097	0.000572295	0.000550617	0.968098	1.13136	1.1881	1.07362	1.09029
MIR-190B-rno;NA	5	7	0	3	744	799	667	655	2570	4533	2747	4526	0.000586281	0.000741058	0	0.000344038	0.000417844	0.0539818	0.0542082	0.0579287	0.0468566	0.0532438	0.73436	0.838256	0.784734	0.672273	0.757406
MIR-220A;NA	4071	5567	2535	2549	1805	1673	1418	1637	1311	2508	1927	4057	0.47735	0.589353	0.467157	0.292317	0.456544	0.130964	0.113505	0.123153	0.117106	0.121182	0.374609	0.463787	0.550485	0.60261	0.497873
MIR-339-3P-mmu;NA	1233	1345	755	1402	5091	5706	3531	4930	1132	1929	1549	3021	0.144577	0.142389	0.139133	0.16078	0.14672	0.369383	0.387124	0.306666	0.352677	0.353962	0.323461	0.356717	0.442502	0.448727	0.392852
MIR-33B;NA	1	0	0	0	6	4	8	12	1006	1693	853	1811	0.000117256	0	0	0	2.93141e-05	0.000435337	0.00027138	0.000694797	0.000858442	0.000564989	0.287458	0.313075	0.243676	0.268998	0.278302
MIR-518A-3P;NA	92	56	24	35	131	157	147	123	3677	5650	3927	8425	0.0107876	0.00592847	0.00442279	0.00401377	0.00628815	0.00950485	0.0106517	0.0127669	0.00879903	0.0104306	1.05068	1.04482	1.12182	1.25141	1.11718
MIR-467D;NA	283	292	136	177	465	594	405	490	1752	2791	2157	5034	0.0331835	0.0309127	0.0250624	0.0202982	0.0273642	0.0337386	0.0403	0.0351741	0.0350531	0.0360664	0.500622	0.51612	0.616189	0.74773	0.595165
MIR-707;NA	41	60	21	38	203	280	166	204	5896	9729	6113	11157	0.00480751	0.00635193	0.00386994	0.00435781	0.0048468	0.0147289	0.0189966	0.014417	0.0145935	0.015684	1.68474	1.79912	1.7463	1.65721	1.72184
MIR-703;NA	1	1	0	0	5	1	1	1	4519	8290	5556	9876	0.000117256	0.000105865	0	0	5.57804e-05	0.000362781	6.78451e-05	8.68496e-05	7.15368e-05	0.000147253	1.29127	1.53301	1.58718	1.46694	1.4696
MIR-883B-5P;NA	18	30	7	10	989	984	905	1135	426	607	527	857	0.00211061	0.00317596	0.00128998	0.00114679	0.00193084	0.071758	0.0667595	0.0785989	0.0811943	0.0745777	0.121727	0.112248	0.150548	0.127295	0.127954
MIR-517A;NA	281	460	177	241	509	459	359	453	805	1193	1082	1761	0.032949	0.0486981	0.032618	0.0276377	0.0354757	0.0369311	0.0311409	0.031179	0.0324062	0.0329143	0.230023	0.220613	0.309094	0.261572	0.255326
MIR-544;NA	1	4	0	0	466	521	418	497	619	923	724	1330	0.000117256	0.000423462	0	0	0.00013518	0.0338112	0.0353473	0.0363031	0.0355538	0.0352538	0.176875	0.170684	0.206825	0.197553	0.187984
MIR-362-3P;NA	2	0	6	5	57	53	48	48	3226	4714	3382	6917	0.000234513	0	0.0011057	0.000573396	0.000478401	0.0041357	0.00359579	0.00416878	0.00343377	0.00383351	0.921808	0.871727	0.966134	1.02742	0.946773
MIR-22-star;NA	1882	2851	1308	1928	384	425	284	352	14600	25477	15907	27851	0.220676	0.301823	0.241042	0.221101	0.246161	0.0278616	0.0288342	0.0246653	0.025181	0.0266355	4.17185	4.71128	4.54414	4.13687	4.39104
MIR-381;NA	18362	20989	12702	20907	25085	26774	20678	25332	2894	4169	2920	5490	2.15306	2.22201	2.34076	2.3976	2.27836	1.82007	1.81648	1.79588	1.81217	1.81115	0.826941	0.770944	0.834155	0.815462	0.811875
MIR-742-mmu;NA	1	0	0	0	6	9	3	6	4561	7740	5081	9570	0.000117256	0	0	0	2.93141e-05	0.000435337	0.000610606	0.000260549	0.000429221	0.000433928	1.30328	1.4313	1.45149	1.42149	1.40189
MIR-343-rno;NA	252	270	141	253	1396	1502	1088	1382	1463	2731	1850	3121	0.0295486	0.0285837	0.0259839	0.0290138	0.0282825	0.101288	0.101903	0.0944923	0.0988639	0.099137	0.418042	0.505025	0.528488	0.46358	0.478784
MIR-291A-3P;NA	145	184	66	125	27	32	18	33	5952	9908	5863	10840	0.0170022	0.0194792	0.0121627	0.0143349	0.0157447	0.00195902	0.00217104	0.00156329	0.00236072	0.00201352	1.70074	1.83222	1.67488	1.61013	1.70449
MIR-743B-3P-rno;NA	2597	4836	1943	2724	37879	40366	33070	37757	618	888	783	1507	0.304515	0.511965	0.358061	0.312386	0.371732	2.74835	2.73863	2.87212	2.70102	2.76503	0.176589	0.164212	0.223679	0.223844	0.197081
MIR-662;NA	7	7	4	4	905	1046	690	850	3886	6944	4530	9132	0.000820794	0.000741058	0.000737131	0.000458717	0.000689425	0.0656633	0.0709659	0.0599262	0.0608063	0.0643404	1.1104	1.28411	1.29408	1.35643	1.26125
MIR-135A;NA	33	44	25	26	95	103	65	78	1237	1377	1180	2218	0.00386946	0.00465808	0.00460707	0.00298166	0.00402907	0.00689283	0.00698804	0.00564522	0.00557987	0.00627649	0.353464	0.254639	0.33709	0.329453	0.318661
MIR-146A;hsa-mir-146a-5p|1.5x|1x	1079	1881	711	1041	11304	13353	10959	12292	3500	5866	3882	7833	0.12652	0.199133	0.131025	0.119381	0.144015	0.820174	0.905935	0.951784	0.879331	0.889306	1.0001	1.08476	1.10897	1.16348	1.08933
MIR-220B;NA	2	3	3	0	144	128	110	126	31	55	37	86	0.000234513	0.000317596	0.000552848	0	0.000276239	0.0104481	0.00868417	0.00955345	0.00901364	0.00942484	0.00885804	0.0101708	0.0105698	0.0127741	0.0105932
MIR-466B-5P;NA	518	604	281	517	13743	15556	11773	13958	4793	7000	5168	9480	0.0607388	0.0639428	0.0517834	0.0592891	0.0589385	0.997139	1.0554	1.02248	0.998511	1.01838	1.36957	1.29446	1.47634	1.40812	1.38712
LET-7D;NA	591	846	360	559	3232	3386	2836	3307	5797	8773	4986	9645	0.0692985	0.0895622	0.0663418	0.0641057	0.072327	0.234501	0.229723	0.246305	0.236572	0.236776	1.65645	1.62233	1.42435	1.43263	1.53394
SV40-S1-3P;NA	25496	37664	17600	24088	401	421	321	441	857	1497	1469	2763	2.98957	3.98732	3.24338	2.76239	3.24566	0.029095	0.0285628	0.0278787	0.0315478	0.0292711	0.244882	0.27683	0.419648	0.410405	0.337941
MIR-192;hsa-miR-192-5p|1x|10x	5927	7877	4017	6971	149272	159479	128299	154724	1332	2351	1523	2779	0.694978	0.833902	0.740264	0.799429	0.767143	10.8306	10.8199	11.1427	11.0685	10.9654	0.38061	0.434754	0.435075	0.412781	0.415805
MIR-384-5P-hsa;NA	14	29	8	12	345	369	321	401	676	807	729	1152	0.00164159	0.0030701	0.00147426	0.00137615	0.00189052	0.0250319	0.0250348	0.0278787	0.0286863	0.0266579	0.193162	0.149233	0.208253	0.171113	0.18044
MIR-17-star-mmu;NA	555	854	406	651	14059	15719	11276	13944	13279	21497	13012	25168	0.0650772	0.0904091	0.0748188	0.0746562	0.0762403	1.02007	1.06646	0.979316	0.99751	1.01584	3.79439	3.97529	3.71713	3.73835	3.80629
EBV-20-5P;NA	19	18	8	9	155	228	158	181	1719	2788	1940	3636	0.00222787	0.00190558	0.00147426	0.00103211	0.00165996	0.0112462	0.0154687	0.0137222	0.0129482	0.0133463	0.491193	0.515565	0.554199	0.540076	0.525258
MIR-122;hsa-miR-122-5p|1x|8x	52729	48799	28680	29927	129	168	117	137	2199	2844	2075	3897	6.18281	5.16613	5.28523	3.432	5.01654	0.00935974	0.011398	0.0101614	0.00980055	0.0101799	0.62835	0.525921	0.592764	0.578844	0.58147
HCMV-UL36;NA	1690	2795	1289	1852	8923	9458	7762	9175	2813	4447	2909	5234	0.198163	0.295894	0.23754	0.212386	0.235996	0.647418	0.641679	0.674126	0.656351	0.654893	0.803796	0.822353	0.831012	0.777437	0.808649
MIR-704;NA	559697	495308	337732	685421	7098	7701	5789	7212	4756	8453	6086	11883	65.628	52.436	62.2382	78.6035	64.7264	0.515003	0.522475	0.502772	0.515924	0.514044	1.359	1.56315	1.73858	1.76505	1.60645
MIR-98;hsa-miR-98-5p|1x|2x	1789	2655	1179	1620	5475	5555	4835	5516	4406	6267	3758	7331	0.209771	0.281073	0.217269	0.18578	0.223473	0.397245	0.376879	0.419918	0.394597	0.39716	1.25899	1.15891	1.07355	1.08892	1.14509
MIR-700;NA	2398	3571	1609	2303	3014	3256	2496	3103	4435	7785	4001	5953	0.281181	0.378046	0.296511	0.264106	0.304961	0.218684	0.220904	0.216777	0.221979	0.219586	1.26727	1.43963	1.14296	0.884234	1.18352
MIR-25;hsa-miR-25-3p|5x|1x	2939	4891	2153	2315	6223	6524	5377	6546	1236	1584	1104	2125	0.344616	0.517788	0.396761	0.265482	0.381162	0.451517	0.442621	0.46699	0.46828	0.457352	0.353179	0.292918	0.315379	0.315639	0.319279
MIR-708;NA	203	291	128	183	270	247	205	250	5081	8164	5106	10801	0.023803	0.0308069	0.0235882	0.0209863	0.0247961	0.0195902	0.0167577	0.0178042	0.0178842	0.0180091	1.45186	1.50971	1.45863	1.60434	1.50613
MIR-433-5P;NA	979	1407	620	918	5062	6307	6390	6031	739	1042	885	1177	0.114794	0.148953	0.114255	0.105276	0.120819	0.367279	0.427899	0.554969	0.431439	0.445396	0.211164	0.19269	0.252817	0.174827	0.207875
MIR-549;NA	19636	26271	14038	20364	21322	23308	19099	21825	6937	10553	6630	12633	2.30244	2.78119	2.58696	2.33533	2.50148	1.54704	1.58133	1.65874	1.56129	1.5871	1.9822	1.95149	1.89399	1.87645	1.92603
MIR-384-3P-hsa;NA	99	200	71	83	753	707	610	749	1243	1596	1420	3507	0.0116084	0.0211731	0.0130841	0.00951837	0.013846	0.0546348	0.0479665	0.0529782	0.0535811	0.0522901	0.355179	0.295137	0.405651	0.520915	0.39422
MIR-545;NA	12	15	3	13	22	17	17	25	5124	8186	4855	9605	0.00140708	0.00158798	0.000552848	0.00149083	0.00125968	0.00159623	0.00115337	0.00147644	0.00178842	0.00150362	1.46415	1.51378	1.38692	1.42669	1.44789
MIR-382;NA	6605	7875	3984	6333	235	250	216	234	5964	8387	4543	8653	0.774478	0.833691	0.734182	0.726263	0.767154	0.0170507	0.0169613	0.0187595	0.0167396	0.0173778	1.70417	1.55095	1.2978	1.28528	1.45955
MIR-363;hsa-miR-363-3p|2x|1x	10979	15143	7333	11879	1671	1594	1379	1581	517	831	920	2017	1.28736	1.60312	1.35135	1.36227	1.40102	0.121241	0.108145	0.119766	0.1131	0.115563	0.147729	0.153671	0.262816	0.299597	0.215953
MIR-92A;hsa-miR-92a-3p|5x|1x	2306	3028	1477	2430	19078	20636	15168	19073	820	1278	990	1743	0.270393	0.320561	0.272186	0.27867	0.285452	1.38423	1.40005	1.31733	1.36442	1.36651	0.23431	0.236332	0.282813	0.258898	0.253088
MIR-667;NA	18	33	7	31	3428	3914	2640	3529	1649	3002	2444	3930	0.00211061	0.00349356	0.00128998	0.00355506	0.0026123	0.248722	0.265546	0.229283	0.252454	0.249001	0.471191	0.555139	0.698176	0.583746	0.577063
MIR-663;NA	38	41	21	24	622	783	492	611	2452	4153	2620	5353	0.00445574	0.00434048	0.00386994	0.0027523	0.00385462	0.0451299	0.0531227	0.04273	0.043709	0.0461729	0.700643	0.767985	0.748454	0.795113	0.753049
MIR-151-5P;hsa-miR-151a-5p|1x|1.5x	129	168	88	106	27159	28402	23091	27225	1562	2321	2229	4080	0.0151261	0.0177854	0.0162169	0.012156	0.0153211	1.97055	1.92694	2.00544	1.94759	1.96263	0.446331	0.429206	0.636757	0.606026	0.52958
MIR-154;hsa-miR-154-5p|1x|1x	17	24	12	18	102	127	108	136	2141	3548	2425	3869	0.00199336	0.00254077	0.00221139	0.00206423	0.00220244	0.00740073	0.00861632	0.00937975	0.00972901	0.00878145	0.611776	0.656107	0.692748	0.574685	0.633829
MIR-135B;NA	182	248	118	193	49	52	40	33	1179	1505	1334	2349	0.0213406	0.0262546	0.0217454	0.0221331	0.0228684	0.00355525	0.00352794	0.00347398	0.00236072	0.00322947	0.336891	0.278309	0.381083	0.348911	0.336299
MIR-220C;NA	4588	7108	3218	4115	14662	15044	12424	14545	1878	3064	2196	4304	0.537972	0.752492	0.593022	0.471905	0.588848	1.06382	1.02066	1.07902	1.0405	1.051	0.536626	0.566604	0.62733	0.639298	0.592465
MIR-540-3P;NA	526	816	360	605	689	808	496	664	12840	20828	10633	18748	0.0616768	0.0863862	0.0663418	0.0693809	0.0709464	0.0499912	0.0548188	0.0430774	0.0475005	0.048847	3.66894	3.85158	3.03752	2.78475	3.3357
MIR-143;NA	3821	5054	2536	4176	22617	24632	19731	23280	4414	7545	4695	8369	0.448036	0.535044	0.467341	0.4789	0.48233	1.641	1.67116	1.71363	1.66538	1.67279	1.26127	1.39524	1.34122	1.2431	1.31021
MIR-883A-3P-hsa;NA	170	292	129	178	606	708	518	637	1756	2741	2310	4109	0.0199336	0.0309127	0.0237725	0.0204129	0.0237579	0.043969	0.0480343	0.0449881	0.045569	0.0456401	0.501765	0.506874	0.659896	0.610334	0.569717
LET-7I;NA	20631	23340	13537	20857	10000	10417	8421	10044	3323	4795	2950	5853	2.41911	2.4709	2.49464	2.39186	2.44413	0.725561	0.706742	0.73136	0.718516	0.720545	0.949525	0.886706	0.842725	0.86938	0.887084
MIR-768-5P;NA	14571	18195	8946	14225	434252	471374	381457	459761	2587	2785	2029	4016	1.70854	1.92622	1.64859	1.63131	1.72867	31.5076	31.9804	33.1294	32.8899	32.3768	0.739218	0.515011	0.579623	0.59652	0.607593
MIR-483-3P-hsa;NA	114	191	66	105	696	655	621	672	5418	9188	6815	13292	0.0133672	0.0202203	0.0121627	0.0120413	0.0144479	0.0504991	0.0444385	0.0539336	0.0480728	0.049236	1.54816	1.69907	1.94684	1.97434	1.7921
MIR-136-2;NA	360	374	173	346	74	90	62	83	1693	2886	1635	3550	0.0422123	0.0395937	0.0318809	0.039679	0.0383415	0.00536915	0.00610606	0.00538467	0.00593756	0.00569936	0.483763	0.533688	0.467069	0.527302	0.502956
MIR-495;hsa-miR-495-3p|1x|1x	1115	1601	839	1067	79	75	67	80	4139	6303	4843	9907	0.130741	0.169491	0.154613	0.122363	0.144302	0.00573193	0.00508838	0.00581892	0.00572295	0.00559055	1.18269	1.16557	1.3835	1.47154	1.30083
MIR-380-5P;NA	19053	25876	11895	13568	188	132	98	124	5086	7706	4843	9241	2.23408	2.73938	2.19204	1.55597	2.18037	0.0136406	0.00895555	0.00851126	0.00887057	0.00999448	1.45329	1.42502	1.3835	1.37262	1.40861
RLCV-16-3P;NA	135	221	68	116	23468	24530	19851	24113	843	1378	1334	3124	0.0158296	0.0233963	0.0125312	0.0133028	0.016265	1.70275	1.66424	1.72405	1.72497	1.704	0.240882	0.254824	0.381083	0.464026	0.335204
MIR-362-3P-hsa;hsa-miR-362-3p|3x|1x	0	1	1	0	5	6	7	8	496	875	733	1672	0	0.000105865	0.000184283	0	7.25371e-05	0.000362781	0.00040707	0.000607947	0.000572295	0.000487523	0.141729	0.161808	0.209396	0.248352	0.190321
MIR-340-3P;NA	8690	10905	5525	10040	17306	18071	14804	17433	3331	4777	3818	8351	1.01896	1.15446	1.01816	1.15138	1.08574	1.25566	1.22603	1.28572	1.2471	1.25363	0.951811	0.883377	1.09069	1.24042	1.04157
MIR-346-rno;NA	579	770	377	571	1987	2138	1738	1894	1087	2166	1845	3154	0.0678914	0.0815164	0.0694746	0.0654818	0.0710911	0.144169	0.145053	0.150945	0.135491	0.143914	0.310603	0.400543	0.52706	0.468482	0.426672
MIR-628-3P;NA	1249	2322	896	1104	5623	5751	4663	5525	324	409	293	377	0.146453	0.24582	0.165117	0.126606	0.170999	0.407983	0.390177	0.40498	0.395241	0.399595	0.0925808	0.0756335	0.0837011	0.055998	0.0769784
MIR-709;NA	1199	1888	902	1107	873	1009	812	953	12433	18100	6989	15192	0.14059	0.199874	0.166223	0.12695	0.158409	0.0633415	0.0684557	0.0705218	0.0681746	0.0676234	3.55265	3.34711	1.99654	2.25656	2.78821
MIR-701;NA	89	199	75	113	66	53	45	63	13475	20632	11968	22439	0.0104358	0.0210672	0.0138212	0.0129587	0.0145707	0.0047887	0.00359579	0.00390823	0.00450682	0.00419989	3.85039	3.81533	3.41889	3.333	3.6044
MIR-705;NA	4	8	6	1	1	1	2	1	113	215	145	236	0.000469025	0.000846924	0.0011057	0.000114679	0.000634081	7.25561e-05	6.78451e-05	0.000173699	7.15368e-05	9.64093e-05	0.032289	0.0397585	0.0414221	0.0350545	0.037131
MIR-546;NA	771	721	579	1017	3335	3629	2904	3410	1367	2472	1252	2116	0.0904046	0.076329	0.1067	0.116629	0.0975155	0.241975	0.24621	0.252211	0.243941	0.246084	0.390611	0.45713	0.357658	0.314302	0.379925
MIR-654-5P-rno;NA	23952	31104	16087	23094	670	745	641	681	4852	7078	4918	9734	2.80852	3.29284	2.96456	2.6484	2.92858	0.0486126	0.0505446	0.0556706	0.0487166	0.0508861	1.38643	1.30889	1.40492	1.44585	1.38652
EBV-8-3P;NA	3038	4328	1947	3210	7685	9269	6911	7926	6978	8998	5517	9690	0.356225	0.458186	0.358798	0.36812	0.385332	0.557594	0.628856	0.600217	0.567001	0.588417	1.99392	1.66394	1.57604	1.43931	1.6683
MIR-292-3P;NA	188	303	124	140	141	157	94	119	4187	6078	3811	8119	0.0220442	0.0320772	0.0228511	0.0160551	0.0232569	0.0102304	0.0106517	0.00816386	0.00851288	0.00938971	1.19641	1.12396	1.08869	1.20596	1.15375
MIR-23A;hsa-miR-23a-3p|1x|10x	15	62	18	31	1323	1385	1050	1300	1176	1976	1956	3422	0.00175884	0.00656366	0.00331709	0.00355506	0.00379866	0.0959918	0.0939654	0.091192	0.0929979	0.0935368	0.336034	0.365408	0.558769	0.50829	0.442125
LET-7F;hsa-let-7f-5p|1x|8x	3869	4839	2546	3451	12766	21804	20337	23648	4093	5801	3421	6679	0.453665	0.512283	0.469184	0.395758	0.457722	0.926252	1.47929	1.76626	1.6917	1.46588	1.16955	1.07274	0.977275	0.992071	1.05291
MIR-378-star;NA	307	627	240	279	849	965	661	785	7743	12844	8263	15644	0.0359977	0.0663777	0.0442279	0.0319955	0.0446497	0.0616002	0.0654705	0.0574076	0.0561564	0.0601587	2.21251	2.37515	2.36049	2.3237	2.31796
MIR-668;NA	6418	10071	4484	7570	148817	160948	118205	150844	3878	6166	4252	8328	0.752551	1.06617	0.826324	0.868122	0.878292	10.7976	10.9195	10.2661	10.7909	10.6935	1.10811	1.14024	1.21467	1.23701	1.17501
MIR-888-star;NA	13	22	5	9	18	11	10	11	1020	1620	862	1722	0.00152433	0.00232904	0.000921414	0.00103211	0.00145172	0.00130601	0.000746296	0.000868496	0.000786905	0.000926927	0.291458	0.299575	0.246247	0.255779	0.273265
MIR-675-3P;NA	6	8	3	6	282	320	258	274	2399	4547	3521	6127	0.000703538	0.000846924	0.000552848	0.000688075	0.000697846	0.0204608	0.0217104	0.0224072	0.0196011	0.0210449	0.685498	0.840845	1.00584	0.910079	0.860566
MIR-591;NA	165	240	116	169	103	131	113	135	4979	9117	6398	13071	0.0193473	0.0254077	0.0213768	0.0193808	0.0213781	0.00747328	0.0088877	0.009814	0.00965747	0.00895812	1.42272	1.68594	1.82771	1.94151	1.71947
HCMV-UL70-5P;NA	97	224	86	115	2991	3248	2417	3049	2724	4714	3081	6174	0.0113739	0.0237139	0.0158483	0.0131881	0.016031	0.217015	0.220361	0.209915	0.218116	0.216352	0.778365	0.871727	0.880147	0.91706	0.861825
EBV-3-3P;NA	0	0	0	0	29	28	29	26	1465	2694	2080	4115	0	0	0	0	0	0.00210413	0.00189966	0.00251864	0.00185996	0.0020956	0.418614	0.498183	0.594192	0.611225	0.530554
MIR-429;NA	202	394	144	197	1948	1816	1700	1884	4809	6991	4433	8325	0.0236858	0.041711	0.0265367	0.0225918	0.0286313	0.141339	0.123207	0.147644	0.134775	0.136741	1.37414	1.2928	1.26637	1.23656	1.29247
MIR-147A;NA	857	1374	538	733	382	496	330	381	3907	6194	4716	9931	0.100489	0.145459	0.0991441	0.0840599	0.107288	0.0277164	0.0336512	0.0286604	0.0272555	0.0293209	1.1164	1.14541	1.34722	1.47511	1.27103
EBV-4;NA	134	224	112	169	540	523	420	519	1740	2330	1782	3439	0.0157123	0.0237139	0.0206397	0.0193808	0.0198617	0.0391803	0.035483	0.0364768	0.0371276	0.0370669	0.497193	0.430871	0.509063	0.510815	0.486985
MIR-872;NA	318	564	202	277	2901	3163	2734	3062	804	1385	901	1587	0.0372875	0.0597081	0.0372251	0.0317661	0.0414967	0.210485	0.214594	0.237447	0.219046	0.220393	0.229738	0.256118	0.257388	0.235726	0.244743
HCMV-UL22A-star;NA	739	1085	449	717	966	1062	734	919	1957	3342	3102	6505	0.0866524	0.114864	0.0827429	0.082225	0.0916211	0.0700892	0.0720515	0.0637476	0.0657424	0.0679077	0.5592	0.618013	0.886146	0.966226	0.757396
MIR-511;NA	858	1405	640	926	12226	12668	10387	12392	1211	2319	1704	2804	0.100606	0.148741	0.117941	0.106193	0.11837	0.887071	0.859461	0.902106	0.886485	0.883781	0.346035	0.428837	0.486781	0.416495	0.419537
MIR-423-3P;NA	7374	11710	5101	7464	44650	47579	35545	43447	2449	4240	2913	6209	0.864648	1.23968	0.940026	0.855966	0.975081	3.23963	3.228	3.08707	3.10806	3.16569	0.699785	0.784074	0.832155	0.922259	0.809568
MIR-200B;hsa-miR-200b-3p|3x|1x	365	781	285	434	179	185	144	181	3030	4981	3240	6099	0.0427985	0.0826809	0.0525206	0.0497708	0.0569427	0.0129875	0.0125513	0.0125063	0.0129482	0.0127483	0.865802	0.921102	0.925569	0.90592	0.904598
MGHV-M1-4;NA	68	103	48	87	2384	2763	2080	2468	640	1000	964	1726	0.00797343	0.0109041	0.00884557	0.00997709	0.00942506	0.172974	0.187456	0.180647	0.176553	0.179407	0.182876	0.184923	0.275385	0.256373	0.224889
MIR-352;NA	181	358	108	215	11548	12346	10220	11403	12814	19942	12058	22554	0.0212234	0.0378998	0.0199025	0.024656	0.0259204	0.837878	0.837615	0.887603	0.815735	0.844708	3.66151	3.68774	3.4446	3.35008	3.53598
MIR-31-2;NA	3	1	0	0	493	523	337	440	1805	3226	2681	5559	0.000351769	0.000105865	0	0	0.000114409	0.0357702	0.035483	0.0292683	0.0314762	0.0329994	0.515767	0.596562	0.76588	0.825711	0.67598
MIR-706;NA	2	2	1	2	22	17	21	9	1423	2698	2177	4179	0.000234513	0.000211731	0.000184283	0.000229358	0.000214971	0.00159623	0.00115337	0.00182384	0.000643832	0.00130432	0.406613	0.498922	0.621902	0.620731	0.537042
MIR-548A-3P;NA	34	47	14	41	128	145	119	175	3510	5865	4159	8209	0.00398671	0.00497568	0.00257996	0.00470185	0.00406105	0.00928718	0.00983753	0.0103351	0.0125189	0.0104947	1.00296	1.08457	1.1881	1.21933	1.12374
MIR-633;NA	10	23	8	6	81	77	63	59	1531	2039	1489	2992	0.00117256	0.00243491	0.00147426	0.000688075	0.00144245	0.00587705	0.00522407	0.00547152	0.00422067	0.00519833	0.437473	0.377058	0.425362	0.444419	0.421078
MIR-470;NA	29765	34481	19647	30847	123200	130379	104347	127876	602	746	606	834	3.49013	3.65035	3.6206	3.53751	3.57465	8.93891	8.84557	9.06249	9.14785	8.99871	0.172017	0.137953	0.173116	0.123879	0.151741
MIR-876-5P-mmu;NA	99	146	58	92	9	3	2	2	2351	4277	3126	5180	0.0116084	0.0154564	0.0106884	0.0105505	0.0120759	0.000653005	0.000203535	0.000173699	0.000143074	0.000293328	0.671783	0.790916	0.893003	0.769416	0.781279
MIR-574-3P;hsa-miR-574-3p|1.5x|1x	163	259	97	139	3204	3214	2525	3101	1894	3238	2640	4596	0.0191128	0.0274192	0.0178754	0.0159404	0.0200869	0.23247	0.218054	0.219295	0.221836	0.222914	0.541198	0.598781	0.754167	0.682671	0.644204
MIR-502-5P;NA	0	0	0	0	1084	1063	856	1069	5805	8224	6174	11828	0	0	0	0	0	0.0786508	0.0721193	0.0743432	0.0764729	0.0753966	1.65874	1.52081	1.76372	1.75688	1.67504
MIR-149;NA	827	1050	500	861	3249	3675	2774	3355	505	751	808	1242	0.0969709	0.111159	0.0921414	0.0987388	0.0997525	0.235735	0.249331	0.240921	0.240006	0.241498	0.1443	0.138877	0.230821	0.184482	0.17462
MIR-592;NA	284	493	194	183	2424	2493	2133	2531	2918	3543	2427	4496	0.0333008	0.0521917	0.0357508	0.0209863	0.0355574	0.175876	0.169138	0.18525	0.18106	0.177831	0.833799	0.655182	0.69332	0.667817	0.71253
MIR-302C-star-mmu;NA	34	46	15	30	114	162	88	117	4025	4708	3294	5948	0.00398671	0.00486981	0.00276424	0.00344038	0.00376529	0.0082714	0.0109909	0.00764276	0.00836981	0.00881872	1.15012	0.870618	0.940995	0.883491	0.961305
MIR-596;NA	13	10	9	5	3059	3506	2171	2943	829	1643	1339	2686	0.00152433	0.00105865	0.00165854	0.000573396	0.00120373	0.221949	0.237865	0.18855	0.210533	0.214724	0.236881	0.303829	0.382511	0.398967	0.330547
MIR-202-3P-mmu;NA	323	518	226	344	458	517	396	425	6593	10203	5891	12025	0.0378738	0.0548383	0.0416479	0.0394496	0.0434524	0.0332307	0.0350759	0.0343924	0.0304032	0.0332755	1.88391	1.88677	1.68288	1.78614	1.80992
MIR-27B;hsa-miR-27b-3p|2x|1x	976	1365	654	1068	27387	28604	22077	27069	1533	2132	1827	3347	0.114442	0.144506	0.120521	0.122477	0.125487	1.98709	1.94064	1.91738	1.93643	1.94539	0.438044	0.394256	0.521918	0.49715	0.462842
MIR-876-3P-mmu;NA	4	7	2	3	123	144	124	114	3152	4344	2906	5064	0.000469025	0.000741058	0.000368565	0.000344038	0.000480672	0.0089244	0.00976969	0.0107693	0.0081552	0.00940466	0.900663	0.803306	0.830155	0.752186	0.821577
MIR-147B;NA	135	209	84	116	3311	3643	2741	3351	2411	4216	2985	6066	0.0158296	0.0221259	0.0154797	0.0133028	0.0166845	0.240233	0.24716	0.238055	0.23972	0.241292	0.688927	0.779636	0.852723	0.901019	0.805576
EBV-5;NA	0	0	0	0	2	0	0	0	107	160	115	193	0	0	0	0	0	0.000145112	0	0	0	3.62781e-05	0.0305745	0.0295877	0.032852	0.0286674	0.0304204
MIR-322-star;NA	3089	5282	2325	3404	1155	1124	949	1056	7509	12111	7700	15275	0.362205	0.559182	0.428457	0.390368	0.435053	0.0838023	0.0762579	0.0824202	0.0755429	0.0795058	2.14565	2.2396	2.19965	2.26889	2.21345
EBV-9;NA	202	276	131	196	350	385	318	333	4264	6072	3874	7760	0.0236858	0.0292189	0.024141	0.0224771	0.0248807	0.0253946	0.0261203	0.0276182	0.0238218	0.0257387	1.21841	1.12285	1.10668	1.15264	1.15015
MIR-873;NA	13	11	13	13	5070	5567	4234	4943	384	726	435	965	0.00152433	0.00116452	0.00239568	0.00149083	0.00164384	0.36786	0.377693	0.367721	0.353607	0.36672	0.109725	0.134254	0.124266	0.143337	0.127896
MIR-7B;NA	23888	28360	15731	20721	8	0	1	6	2279	2971	2244	4449	2.80102	3.00235	2.89895	2.37627	2.76965	0.000580449	0	8.68496e-05	0.000429221	0.00027413	0.651209	0.549406	0.641042	0.660836	0.625623
KSHV-K12-6-3P;NA	518	755	321	522	132	197	126	168	4668	7327	4111	7392	0.0607388	0.0799284	0.0591548	0.0598625	0.0649211	0.00957741	0.0133655	0.010943	0.0120182	0.011476	1.33385	1.35493	1.17439	1.09798	1.24029
MIR-182-hsa;hsa-miR-182-5p|3x|1x	4982	6212	3418	5147	81805	86555	72551	86308	177	231	218	403	0.584171	0.657636	0.629878	0.590254	0.615485	5.93545	5.87233	6.30102	6.1742	6.07075	0.0505766	0.0427172	0.0622759	0.05986	0.0538574
MIR-21;hsa-miR-21-5p|1x|10x	430	803	332	443	2964	3245	2637	3033	2886	3940	2688	5063	0.0504202	0.08501	0.0611819	0.0508029	0.0618537	0.215056	0.220157	0.229022	0.216971	0.220302	0.824655	0.728597	0.767879	0.752037	0.768292
EBV-1-2;NA	612	1023	437	649	484	587	423	546	2008	2392	1618	2994	0.0717608	0.1083	0.0805315	0.0744268	0.0837549	0.0351172	0.0398251	0.0367374	0.0390591	0.0376847	0.573773	0.442336	0.462213	0.444716	0.480759
MGHV-M1-5;NA	1942	3093	1292	1765	83853	87209	69664	85633	17428	25948	13936	27356	0.227712	0.327442	0.238093	0.202409	0.248914	6.08405	5.9167	6.05029	6.12591	6.04424	4.97993	4.79838	3.98109	4.06335	4.45569
MGHV-M1-1;NA	156	303	97	181	244	252	217	245	3166	4491	3371	6335	0.018292	0.0320772	0.0178754	0.0207569	0.0222504	0.0177037	0.017097	0.0188464	0.0175265	0.0177934	0.904663	0.830489	0.962992	0.940975	0.90978
MIR-133A;hsa-miR-133a-3p|1x|4x	4	10	1	5	2198	2273	1857	2294	2057	2932	2183	4113	0.000469025	0.00105865	0.000184283	0.000573396	0.00057134	0.159478	0.154212	0.16128	0.164106	0.159769	0.587774	0.542194	0.623616	0.610928	0.591128
MIR-202-5P;NA	88	189	55	58	99	81	74	88	2202	3128	2697	5296	0.0103186	0.0200086	0.0101355	0.00665139	0.0117785	0.00718306	0.00549545	0.00642687	0.00629524	0.00635015	0.629207	0.578439	0.77045	0.786646	0.691186
MIR-194;NA	277	537	215	320	6659	7563	5544	6949	3267	4640	3929	7747	0.03248	0.0568498	0.0396208	0.0366973	0.041412	0.483151	0.513112	0.481494	0.49711	0.493717	0.933523	0.858043	1.1224	1.15071	1.01617
MIR-198;NA	72	112	59	87	1838	1996	1563	1910	3203	4568	2812	6148	0.00844245	0.0118569	0.0108727	0.00997709	0.0102873	0.133358	0.135419	0.135746	0.136635	0.13529	0.915236	0.844728	0.803302	0.913199	0.869116
MIR-801-mmu;NA	304	519	201	344	1910	2135	1513	1947	6228	9903	6428	11885	0.0356459	0.0549442	0.0370408	0.0394496	0.0417701	0.138582	0.144849	0.131403	0.139282	0.138529	1.77961	1.83129	1.83628	1.76535	1.80313
MIR-630;NA	97	139	55	97	504	498	485	480	4737	6642	4014	7934	0.0113739	0.0147153	0.0101355	0.0111239	0.0118371	0.0365683	0.0337868	0.042122	0.0343377	0.0367037	1.35357	1.22826	1.14668	1.17848	1.22675
MIR-634;NA	1700	2225	988	1758	72103	76616	59319	70459	925	1566	1122	1632	0.199336	0.235551	0.182071	0.201606	0.204641	5.23151	5.19802	5.15183	5.04041	5.15544	0.264313	0.289589	0.320521	0.242411	0.279208
MIR-693-5P;NA	475	683	301	331	1370	1427	1205	1372	1892	3550	2848	5092	0.0556967	0.0723061	0.0554691	0.0379588	0.0553577	0.0994019	0.0968149	0.104654	0.0981486	0.0997548	0.540626	0.656477	0.813586	0.756345	0.691759
MIR-471;NA	842	1606	636	781	460	517	410	459	564	666	580	808	0.0987298	0.17002	0.117204	0.0895645	0.11888	0.0333758	0.0350759	0.0356083	0.0328354	0.0342239	0.161159	0.123159	0.165688	0.120017	0.142506
MIR-26A;hsa-miR-26a-5p|1x|3x	410	618	239	364	11215	11856	9717	11124	407	457	471	673	0.0480751	0.0654249	0.0440436	0.0417432	0.0498217	0.813717	0.804371	0.843917	0.795776	0.814445	0.116298	0.0845098	0.13455	0.0999646	0.108831
MIR-466F-5P;NA	275	179	104	164	102	168	110	93	791	1087	916	1417	0.0322455	0.0189499	0.0191654	0.0188074	0.022292	0.00740073	0.011398	0.00955345	0.00665293	0.00875127	0.226023	0.201011	0.261673	0.210475	0.224796
MIR-541-5P;NA	22907	30166	15034	22542	77827	91302	65398	81734	3460	4712	3064	6526	2.68599	3.19354	2.77051	2.5851	2.80878	5.64683	6.19439	5.67979	5.84699	5.842	0.988672	0.871357	0.875291	0.969345	0.926166
MIR-30E;NA	201	356	119	198	677	705	564	626	4598	6486	4306	7777	0.0235685	0.0376881	0.0219296	0.0227065	0.0264732	0.0491205	0.0478308	0.0489832	0.0447821	0.0476791	1.31385	1.19941	1.23009	1.15516	1.22463
MIR-295-3P-rno;NA	535	651	347	610	1939	2012	1500	1836	3852	5631	3271	6454	0.0627321	0.0689184	0.0639461	0.0699543	0.0663877	0.140686	0.136504	0.130274	0.131342	0.134702	1.10068	1.0413	0.934425	0.958651	1.00877
MIR-520D-5P;NA	1	2	1	3	19	20	17	28	3593	6385	4152	7639	0.000117256	0.000211731	0.000184283	0.000344038	0.000214327	0.00137857	0.0013569	0.00147644	0.00200303	0.00155374	1.02668	1.18073	1.1861	1.13467	1.13204
MIR-501-3P;NA	15042	20436	9343	9326	8716	8607	6423	7848	688	1151	606	993	1.76377	2.16347	1.72175	1.0695	1.67962	0.632399	0.583942	0.557835	0.561421	0.583899	0.196591	0.212846	0.173116	0.147496	0.182512
MIR-597;NA	4	23	0	15	149	168	150	147	360	718	560	925	0.000469025	0.00243491	0	0.00172019	0.00115603	0.0108109	0.011398	0.0130274	0.0105159	0.011438	0.102868	0.132775	0.159975	0.137396	0.133253
KSHV-K12-3;NA	15464	25467	11330	12280	18359	20223	15021	18213	4025	5712	3356	6407	1.81325	2.69608	2.08792	1.40826	2.00138	1.33206	1.37203	1.30457	1.3029	1.32789	1.15012	1.05628	0.958707	0.951669	1.02919
HCMV-US4;NA	873	900	550	858	528	566	376	481	144	191	119	209	0.102365	0.0952789	0.101355	0.0983948	0.0993485	0.0383096	0.0384003	0.0326554	0.0344092	0.0359437	0.041147	0.0353203	0.0339947	0.031044	0.0353765
MIR-485-5P;hsa-miR-485-5p|1x|2x	207939	203176	127898	193230	98260	104047	81189	97755	5078	8634	4576	8831	24.3822	21.5093	23.5694	22.1595	22.9051	7.12937	7.05908	7.05123	6.99308	7.05819	1.451	1.59663	1.30722	1.31172	1.41664
MIR-501-5P-hsa;NA	9	15	8	16	99	98	87	100	7296	10948	6794	14080	0.00105531	0.00158798	0.00147426	0.00183487	0.0014881	0.00718306	0.00664882	0.00755591	0.00715368	0.00713537	2.08478	2.02454	1.94084	2.09139	2.03539
MIR-197;hsa-miR-197-3p|5x|1x	153	252	92	137	969	1041	769	921	526	919	844	1251	0.0179402	0.0266781	0.016954	0.0157111	0.0193208	0.0703069	0.0706267	0.0667873	0.0658854	0.0684016	0.150301	0.169944	0.241105	0.185818	0.186792
MIR-151-3P-hsa;hsa-miR-151a-3p|1x|10x	250185	207086	145049	292902	70997	72471	55591	70425	7971	12758	6962	12571	29.3358	21.9233	26.73	33.5898	27.8947	5.15127	4.9168	4.82805	5.03798	4.98353	2.27766	2.35925	1.98883	1.86724	2.12325
MIR-490-3P;hsa-miR-490-3p|1x|1x	7196	9855	4491	6759	8761	9107	6889	8421	3984	7284	5682	11747	0.843776	1.0433	0.827614	0.775117	0.872453	0.635664	0.617865	0.598307	0.602412	0.613562	1.1384	1.34698	1.62317	1.74485	1.46335
EBV-1-3;NA	1872	3437	1479	1720	866	915	703	861	2380	3282	2625	4885	0.219504	0.36386	0.272554	0.197248	0.263291	0.0628336	0.0620782	0.0610552	0.0615932	0.0618901	0.680069	0.606917	0.749882	0.725598	0.690617
MGHV-M1-2;NA	241	444	120	194	648	492	499	627	2233	4229	3245	6225	0.0282588	0.0470043	0.0221139	0.0222478	0.0299062	0.0470164	0.0333798	0.0433379	0.0448536	0.0421469	0.638065	0.78204	0.926997	0.924636	0.817934
MGHV-M1-6;NA	65	92	43	48	168	196	160	200	8779	14298	8644	14847	0.00762166	0.00973962	0.00792416	0.0055046	0.00769751	0.0121894	0.0132976	0.0138959	0.0143074	0.0134226	2.50854	2.64403	2.46933	2.20531	2.4568
MIR-374B;hsa-miR-374b-5p|1x|1x	34	79	27	48	203	141	120	158	6046	9453	5936	11768	0.00398671	0.00836337	0.00497563	0.0055046	0.00570758	0.0147289	0.00956615	0.0104219	0.0113028	0.011505	1.7276	1.74808	1.69573	1.74797	1.72985
MIR-350;NA	2	4	0	4	19	18	25	14	336	519	520	816	0.000234513	0.000423462	0	0.000458717	0.000279173	0.00137857	0.00122121	0.00217124	0.00100152	0.00144313	0.0960098	0.0959751	0.148548	0.121205	0.115435
MIR-337-5P;NA	7	13	8	10	2472	2701	2045	2392	5845	8568	5627	11118	0.000820794	0.00137625	0.00147426	0.00114679	0.00120452	0.179359	0.18325	0.177607	0.171116	0.177833	1.67017	1.58442	1.60746	1.65142	1.62837
KSHV-K12-12;NA	27	47	16	16	220	214	146	187	637	1091	1120	1930	0.00316592	0.00497568	0.00294852	0.00183487	0.00323125	0.0159623	0.0145188	0.01268	0.0133774	0.0141347	0.182018	0.201751	0.31995	0.286674	0.247598
MIR-526B;NA	243	434	190	273	642	748	471	658	4308	5308	3426	7026	0.0284933	0.0459456	0.0350137	0.0313074	0.03519	0.046581	0.0507481	0.0409061	0.0470712	0.0463266	1.23098	0.981572	0.978703	1.04361	1.05872
MIR-631;NA	12266	17279	8167	12489	3325	3642	2716	3312	916	1908	1781	2972	1.43827	1.82925	1.50504	1.43223	1.5512	0.241249	0.247092	0.235883	0.23693	0.240289	0.261741	0.352833	0.508777	0.441449	0.3912
MIR-639;NA	86	139	78	64	244	266	185	214	1620	3045	1857	3114	0.010084	0.0147153	0.0143741	0.00733947	0.0116282	0.0177037	0.0180468	0.0160672	0.0153089	0.0167816	0.462904	0.563091	0.530488	0.462541	0.504756
MIR-635;NA	1136	1515	699	1213	5448	6029	4746	5478	967	1661	1239	2353	0.133203	0.160386	0.128814	0.139106	0.140377	0.395286	0.409038	0.412188	0.391879	0.402098	0.276314	0.307157	0.353944	0.349505	0.32173
MIR-532-5P-rno;NA	6721	9791	4955	6198	4060	4183	3428	4078	2821	4887	3039	5130	0.788079	1.03653	0.913121	0.710782	0.862128	0.294578	0.283796	0.29772	0.291727	0.291955	0.806082	0.903719	0.868149	0.761989	0.834985
RLCV-12-5P;NA	41	52	22	24	636	733	487	635	2720	5083	3618	7873	0.00480751	0.00550501	0.00405422	0.0027523	0.00427976	0.0461457	0.0497304	0.0422957	0.0454259	0.0458994	0.777222	0.939964	1.03355	1.16942	0.98004
MIR-363-star;NA	56901	72902	37180	45848	4270	4649	3268	4014	18460	26248	13241	27274	6.672	7.71781	6.85163	5.25781	6.62481	0.309815	0.315412	0.283824	0.287149	0.29905	5.27482	4.85386	3.78255	4.05117	4.4906
HCMV-UL22A;NA	510	660	359	597	762	879	666	716	518	843	722	1205	0.0598007	0.0698712	0.0661575	0.0684635	0.0660732	0.0552878	0.0596358	0.0578418	0.0512204	0.0559964	0.148015	0.15589	0.206253	0.178986	0.172286
MIR-712-star;NA	21	47	5	12	0	2	5	6	7536	12204	7482	15156	0.00246238	0.00497568	0.000921414	0.00137615	0.00243391	0	0.00013569	0.000434248	0.000429221	0.00024979	2.15336	2.2568	2.13738	2.25121	2.19969
MIR-504-rno;NA	11831	13683	7940	13920	6736	7238	5272	6460	2719	4951	3670	7193	1.38726	1.44856	1.4632	1.59633	1.47384	0.488738	0.491063	0.457871	0.462128	0.47495	0.776936	0.915554	1.04841	1.06842	0.952329
MIR-345-5P-hsa;hsa-miR-345-5p|1x|4x	1239	1573	787	1458	22684	24423	18458	22088	2317	3926	2567	5632	0.145281	0.166526	0.14503	0.167202	0.15601	1.64586	1.65698	1.60307	1.58011	1.6215	0.662067	0.726008	0.733313	0.836554	0.739486
MIR-465C-5P;NA	15557	18368	9356	13591	41614	43314	35262	41866	3321	4143	2770	5189	1.82416	1.94454	1.72415	1.55861	1.76286	3.01935	2.93864	3.06249	2.99496	3.00386	0.948954	0.766136	0.791304	0.770753	0.819287
RLCV-4-3P;NA	95	130	38	80	225188	243855	187515	230059	4360	7155	5176	11039	0.0111393	0.0137625	0.00700274	0.00917434	0.0102697	16.3388	16.5444	16.2856	16.4577	16.4066	1.24584	1.32312	1.47862	1.63969	1.42182
MIR-744;hsa-miR-744-5p|1.5x|1x	207	332	130	254	4332	4799	3509	4335	1269	1789	1188	2203	0.0242721	0.0351473	0.0239568	0.0291285	0.0281262	0.314313	0.325588	0.304755	0.310112	0.313692	0.362608	0.330827	0.339375	0.327225	0.340009
MIR-594;NA	16202	19935	10234	15924	3053	3421	2396	3140	5380	8042	4903	10730	1.89979	2.11043	1.88595	1.82615	1.93058	0.221514	0.232098	0.208092	0.224626	0.221582	1.5373	1.48715	1.40064	1.59379	1.50472
MIR-380-3P-hsa;NA	23	49	16	20	143	143	132	141	1957	2617	1894	3357	0.00269689	0.00518741	0.00294852	0.00229358	0.0032816	0.0103755	0.00970184	0.0114641	0.0100867	0.0104071	0.5592	0.483944	0.541058	0.498635	0.520709
MIR-520C-3P;NA	145	145	66	75	219	236	188	205	10549	16431	10111	20987	0.0170022	0.0153505	0.0121627	0.00860094	0.0132791	0.0158898	0.0160114	0.0163277	0.0146651	0.0157235	3.01431	3.03847	2.8884	3.11732	3.01463
KSHV-K12-8;NA	9819	10021	5978	10651	30382	32497	25288	30650	7671	12903	7330	13413	1.15134	1.06088	1.10164	1.22145	1.13383	2.2044	2.20476	2.19625	2.1926	2.1995	2.19194	2.38606	2.09396	1.99231	2.16607
MIR-524-5P;NA	53	81	36	70	595	614	524	632	9637	14833	9607	18785	0.00621458	0.0085751	0.00663418	0.00802754	0.00736285	0.0431709	0.0416569	0.0455092	0.0452113	0.0438871	2.75371	2.74296	2.74443	2.79025	2.75784
MIR-576-5P;NA	80	161	46	59	8329	9303	7069	8344	2045	2540	2067	4084	0.0093805	0.0170443	0.008477	0.00676607	0.010417	0.60432	0.631163	0.61394	0.596903	0.611581	0.584345	0.469705	0.590479	0.606621	0.562787
MIR-18B-hsa;hsa-miR-18b-5p|1x|10x	8	14	1	6	30	26	20	22	1165	2131	1433	2600	0.00093805	0.00148212	0.000184283	0.000688075	0.000823131	0.00217668	0.00176397	0.00173699	0.00157381	0.00181286	0.332891	0.394071	0.409364	0.386193	0.38063
MIR-384-5P;NA	134	218	93	124	2026	2430	1736	1965	1531	2015	1823	3570	0.0157123	0.0230787	0.0171383	0.0142202	0.0175374	0.146999	0.164864	0.150771	0.14057	0.150801	0.437473	0.37262	0.520775	0.530273	0.465285
MIR-450A-5P-rno;NA	727	1318	560	690	4934	5236	4201	4955	2273	3018	2393	4155	0.0852453	0.139531	0.103198	0.0791286	0.101776	0.357992	0.355237	0.364855	0.354465	0.358137	0.649495	0.558098	0.683607	0.617167	0.627091
MIR-134;hsa-miR-134-5p|1x|3x	16455	21181	10533	15037	9135	9804	7310	8778	4697	6530	3900	7322	1.92945	2.24234	1.94105	1.72443	1.95932	0.6628	0.665153	0.63487	0.62795	0.647694	1.34214	1.20755	1.11411	1.08758	1.18784
EBV-7;NA	105	130	69	126	161	172	130	149	2209	3037	2126	4017	0.0123119	0.0137625	0.0127155	0.0144496	0.0133099	0.0116815	0.0116694	0.0112904	0.010659	0.0113251	0.631207	0.561611	0.607333	0.596669	0.599205
MIR-879;NA	39	85	32	70	6871	7494	5907	7119	5745	9850	5081	10470	0.004573	0.00899857	0.00589705	0.00802754	0.00687404	0.498533	0.508431	0.51302	0.509271	0.507314	1.6416	1.82149	1.45149	1.55517	1.61744
EBV-11-5P;NA	5	20	6	6	63	78	55	72	237	357	220	426	0.000586281	0.00211731	0.0011057	0.000688075	0.00112434	0.00457104	0.00529192	0.00477673	0.00515065	0.00494758	0.0677212	0.0660175	0.0628473	0.0632763	0.0649656
MIR-30E-star;hsa-miR-30e-3p|1x|1.5x	39012	45980	25292	37539	99854	109574	85203	103813	12291	16626	9594	18701	4.5744	4.8677	4.66088	4.30494	4.60198	7.24502	7.43406	7.39984	7.42645	7.37634	3.51207	3.07453	2.74071	2.77777	3.02627
MIR-514;NA	65867	99880	50137	81324	3026	3146	2624	3009	9741	13998	8765	16694	7.72332	10.5738	9.23938	9.32617	9.21568	0.219555	0.213441	0.227893	0.215254	0.219036	2.78343	2.58855	2.50389	2.47966	2.58888
MIR-510;NA	4	9	7	11	295	288	246	285	1742	2464	1517	2775	0.000469025	0.000952789	0.00128998	0.00126147	0.000993316	0.0214041	0.0195394	0.021365	0.020388	0.0206741	0.497765	0.45565	0.43336	0.412187	0.449741
MGHV-M1-3;NA	7	14	4	11	2067	2423	1728	2091	5742	9366	6113	13256	0.000820794	0.00148212	0.000737131	0.00126147	0.00107538	0.149974	0.164389	0.150076	0.149584	0.153505	1.64074	1.73199	1.7463	1.96899	1.772
MIR-296-3P;NA	273	315	195	277	443	507	372	475	1240	2023	1127	1960	0.032011	0.0333476	0.0359351	0.0317661	0.033265	0.0321424	0.0343974	0.032308	0.03398	0.033207	0.354322	0.374099	0.321949	0.29113	0.335375
MIR-351;NA	1144	1738	795	1164	74496	77901	59858	73271	1041	1665	1218	2266	0.134141	0.183994	0.146505	0.133487	0.149532	5.40514	5.2852	5.19864	5.24158	5.28264	0.297459	0.307897	0.347945	0.336582	0.322471
MIR-632;NA	11010	13930	8077	14733	4358	4622	3496	4369	4831	7858	4689	8548	1.29099	1.47471	1.48845	1.68957	1.48593	0.3162	0.31358	0.303626	0.312544	0.311488	1.38043	1.45313	1.3395	1.26968	1.36068
MIR-636;NA	177	126	77	115	12773	13573	9730	12234	5878	9834	5604	11524	0.0207544	0.0133391	0.0141898	0.0131881	0.0153678	0.926759	0.920861	0.845046	0.875182	0.891962	1.6796	1.81853	1.60089	1.71173	1.70269
MIR-582-3P-hsa;NA	144669	143277	91902	179103	110002	117844	95580	112909	3711	5638	3756	7175	16.9633	15.1681	16.936	20.5394	17.4017	7.98132	7.99513	8.30108	8.07715	8.08867	1.06039	1.0426	1.07297	1.06574	1.06043
LET-7B;hsa-let-7b-5p|1x|3x	6210	6181	3669	5041	891	895	871	859	4089	5853	3165	6010	0.728162	0.654355	0.676133	0.578098	0.659187	0.0646475	0.0607213	0.075646	0.0614502	0.0656162	1.1684	1.08235	0.904144	0.892701	1.0119
MIR-421-3P;hsa-miR-421|1x|1x	2	0	2	0	105	90	93	106	8	6	9	10	0.000234513	0	0.000368565	0	0.00015077	0.00761839	0.00610606	0.00807701	0.00758291	0.00734609	0.00228595	0.00110954	0.00257102	0.00148536	0.00186297
MIR-196C;NA	6727	7619	3934	6085	1263	1451	1038	1334	4482	6059	3611	6781	0.788783	0.806589	0.724968	0.697823	0.754541	0.0916384	0.0984432	0.0901499	0.0954302	0.0939154	1.2807	1.12045	1.03155	1.00722	1.10998
RLCV-11;NA	597	1021	364	591	3326	3669	3114	3522	7461	11857	7083	14880	0.070002	0.108089	0.0670789	0.0677754	0.0782362	0.241322	0.248924	0.27045	0.251953	0.253162	2.13193	2.19263	2.0234	2.21021	2.13954
MIR-758;NA	6119	9131	4319	7458	15754	16779	13334	15694	4313	6007	4274	8166	0.717491	0.966658	0.795917	0.855277	0.833836	1.14305	1.13837	1.15805	1.1227	1.14054	1.23241	1.11083	1.22095	1.21294	1.19428
MIR-515-5P;NA	33	80	13	17	6511	6942	5445	6601	3073	4420	3199	6616	0.00386946	0.00846924	0.00239568	0.00194955	0.00417098	0.472413	0.47098	0.472896	0.472215	0.472126	0.878089	0.81736	0.913856	0.982713	0.898005
MIR-150;hsa-miR-150-5p|1x|3x	87	128	27	49	3011	3186	2342	2859	1389	2261	1791	2856	0.0102013	0.0135508	0.00497563	0.00561928	0.00858675	0.218466	0.216154	0.203402	0.204524	0.210637	0.396897	0.418111	0.511634	0.424218	0.437715
MIR-595;NA	2354	2795	1513	2554	338	330	272	293	8502	12398	7167	14167	0.276021	0.295894	0.27882	0.292891	0.285906	0.024524	0.0223889	0.0236231	0.0209603	0.0228741	2.42939	2.29268	2.04739	2.10431	2.21844
MIR-599;NA	151	192	100	117	5986	6443	5244	6394	3249	4774	3599	6740	0.0177057	0.0203262	0.0184283	0.0134175	0.0174694	0.434321	0.437126	0.455439	0.457407	0.446073	0.92838	0.882823	1.02812	1.00113	0.960115
MIR-483-3P;NA	26	44	18	19	153	133	110	150	2434	4364	2868	5615	0.00304866	0.00465808	0.00331709	0.0021789	0.00330068	0.0111011	0.00902339	0.00955345	0.0107305	0.0101021	0.695499	0.807004	0.8193	0.834029	0.788958
KSHV-K12-5;NA	41062	45956	24306	32477	41560	46490	34213	42039	5368	8600	5591	10686	4.81478	4.86515	4.47918	3.72444	4.47089	3.01543	3.15412	2.97138	3.00734	3.03707	1.53387	1.59034	1.59718	1.58725	1.57716
KSHV-K12-1;NA	145	246	90	120	587	672	442	510	5183	6673	4513	9438	0.0170022	0.0260429	0.0165854	0.0137615	0.018348	0.0425904	0.0455919	0.0383875	0.0364838	0.0407634	1.48101	1.23399	1.28923	1.40188	1.35153
MIR-371-5P;NA	5876	7696	3906	7091	233081	248529	200584	237060	4502	6972	3859	6662	0.688998	0.814741	0.719808	0.81319	0.759184	16.9115	16.8615	17.4206	16.9585	17.038	1.28642	1.28928	1.1024	0.989546	1.16691
KSHV-K12-9;NA	13	15	7	18	169	191	112	162	9922	16477	9557	18156	0.00152433	0.00158798	0.00128998	0.00206423	0.00161663	0.012262	0.0129584	0.00972715	0.011589	0.0116341	2.83515	3.04698	2.73014	2.69682	2.82727
MIR-1-rno;NA	61730	64464	38397	42118	4	5	3	7	2412	3504	2574	5261	7.23823	6.82451	7.0759	4.83006	6.49218	0.000290225	0.000339225	0.000260549	0.000500758	0.000347689	0.689213	0.64797	0.735313	0.781447	0.713486
MIR-881-mmu;NA	256433	292511	174024	303523	13915	14886	11989	14586	1052	1546	1369	2532	30.0684	30.9668	32.0696	34.8078	31.9781	1.00962	1.00994	1.04124	1.04344	1.02606	0.300602	0.285891	0.391081	0.376093	0.338417
MIR-199A-3P;hsa-miR-199b-3p|1x|2x	106	172	54	116	1481	1388	1289	1433	2225	3753	2475	4916	0.0124292	0.0182089	0.00995127	0.0133028	0.013473	0.107456	0.0941689	0.111949	0.102512	0.104021	0.635779	0.694016	0.707032	0.730202	0.691757
MIR-743B-5P;NA	3600	6633	2756	3367	4995	5290	4215	4959	8890	14586	9335	18022	0.422123	0.702206	0.507883	0.386125	0.504584	0.362418	0.3589	0.366071	0.354751	0.360535	2.54026	2.69729	2.66672	2.67691	2.6453
MIR-871-mmu;NA	514	688	309	481	31000	32897	26950	31928	1628	1993	1379	2581	0.0602697	0.0728355	0.0569434	0.0551607	0.0613023	2.24924	2.2319	2.3406	2.28403	2.27644	0.46519	0.368552	0.393938	0.383371	0.402763
EBV-1-1;NA	1817	2646	1257	2008	11038	11730	9439	11417	6070	9236	4529	6665	0.213055	0.28012	0.231643	0.230276	0.238773	0.800875	0.795823	0.819773	0.816736	0.808302	1.73446	1.70795	1.2938	0.989992	1.43155
MGHV-M1-8;NA	163	277	139	176	442	526	390	421	3286	4564	2719	6117	0.0191128	0.0293247	0.0256153	0.0201835	0.0235591	0.0320698	0.0356865	0.0338713	0.030117	0.0329362	0.938953	0.843989	0.776735	0.908594	0.867068
MIR-770-3P;NA	72607	74270	41782	64360	2932	3090	2326	2953	10386	16149	8490	17191	8.51363	7.86263	7.6997	7.38075	7.86418	0.212735	0.209641	0.202012	0.211248	0.208909	2.96773	2.98632	2.42533	2.55348	2.73322
KSHV-K12-10A;NA	283	302	157	264	2013	2064	1524	1961	1129	1846	1216	1841	0.0331835	0.0319714	0.0289324	0.0302753	0.0310907	0.146055	0.140032	0.132359	0.140284	0.139683	0.322604	0.341368	0.347374	0.273455	0.3212
MIR-488-star;NA	160	374	152	209	2075	2035	1603	1898	376	591	452	693	0.018761	0.0395937	0.028011	0.023968	0.0275834	0.150554	0.138065	0.13922	0.135777	0.140904	0.107439	0.10929	0.129123	0.102935	0.112197
MIR-298-hsa;NA	1	2	1	2	13	5	8	7	1316	2201	1383	2661	0.000117256	0.000211731	0.000184283	0.000229358	0.000185657	0.00094323	0.000339225	0.000694797	0.000500758	0.000619502	0.376038	0.407016	0.395081	0.395254	0.393347
MIR-411;hsa-miR-411-5p|2x|1x	4392	6875	2942	4045	92467	113431	88980	103458	5180	8189	5627	10250	0.51499	0.727825	0.54216	0.463877	0.562213	6.70905	7.69573	7.72787	7.40106	7.38343	1.48015	1.51433	1.60746	1.52249	1.53111
MIR-637;NA	190	198	83	164	9407	9885	7270	9453	2959	4685	3200	6836	0.0222787	0.0209614	0.0152955	0.0188074	0.0193357	0.682535	0.670648	0.631396	0.676238	0.665205	0.845514	0.866364	0.914142	1.01539	0.910353
MIR-509-3P-rno;NA	3248	4852	2103	2369	548	611	546	611	6967	10833	6430	12262	0.380848	0.513659	0.387547	0.271675	0.388432	0.0397608	0.0414533	0.0474199	0.043709	0.0430857	1.99077	2.00327	1.83685	1.82135	1.91306
MIR-339-5P;hsa-miR-339-5p|10x|1x	105	186	72	91	160	158	98	112	872	1549	1235	2890	0.0123119	0.019691	0.0132684	0.0104358	0.0139268	0.011609	0.0107195	0.00851126	0.00801213	0.00971297	0.249168	0.286446	0.352802	0.429269	0.329421
MIR-29C-star;NA	12	31	12	6	93	97	77	100	4908	8050	5353	10467	0.00140708	0.00328183	0.00221139	0.000688075	0.00189709	0.00674772	0.00658097	0.00668742	0.00715368	0.00679245	1.40243	1.48863	1.52919	1.55472	1.49374
MIR-7;hsa-miR-7-5p|1x|5x	6679	7805	4231	6921	6	14	12	14	3065	4172	2955	5765	0.783155	0.82628	0.7797	0.793695	0.795707	0.000435337	0.000949831	0.00104219	0.00100152	0.00085722	0.875803	0.771499	0.844153	0.856309	0.836941
MIR-106A-mmu;NA	63	115	45	62	379	428	324	373	2075	2867	1970	3643	0.00738715	0.0121745	0.00829272	0.00711011	0.00874113	0.0274988	0.0290377	0.0281393	0.0266832	0.0278397	0.592917	0.530174	0.562769	0.541116	0.556744
MIR-666-3P;NA	2	1	0	0	504	598	411	531	2388	3892	2493	5931	0.000234513	0.000105865	0	0	8.50945e-05	0.0365683	0.0405713	0.0356952	0.0379861	0.0377052	0.682355	0.71972	0.712174	0.880966	0.748804
MIR-519A;NA	42	61	14	29	68	81	51	59	4766	8206	5883	11371	0.00492476	0.00645779	0.00257996	0.0033257	0.00432205	0.00493382	0.00549545	0.00442933	0.00422067	0.00476982	1.36185	1.51748	1.68059	1.689	1.56223
MIR-560;NA	1	5	1	4	339	399	291	357	2288	4329	2697	5193	0.000117256	0.000529327	0.000184283	0.000458717	0.000322396	0.0245965	0.0270702	0.0252732	0.0255387	0.0256196	0.653781	0.800532	0.77045	0.771347	0.749027
MIR-519E;NA	2	8	0	1	32	35	22	27	5707	9514	5795	11070	0.000234513	0.000846924	0	0.000114679	0.000299029	0.0023218	0.00237458	0.00191069	0.00193149	0.00213464	1.63074	1.75936	1.65545	1.64429	1.67246
MIR-362-5P;NA	311	523	211	284	537	514	360	512	779	1330	970	1931	0.0364667	0.0553676	0.0388837	0.0325689	0.0408217	0.0389626	0.0348724	0.0312658	0.0366269	0.0354319	0.222594	0.245948	0.277099	0.286823	0.258116
MIR-665-hsa;NA	7	15	5	5	397	374	314	328	1206	2216	1259	3196	0.000820794	0.00158798	0.000921414	0.000573396	0.000975896	0.0288048	0.0253741	0.0272708	0.0234641	0.0262284	0.344606	0.409789	0.359658	0.474721	0.397194
MIR-759;NA	28	41	13	37	790	810	663	798	2747	4911	3438	6606	0.00328318	0.00434048	0.00239568	0.00424313	0.00356562	0.0573193	0.0549545	0.0575813	0.0570864	0.0567354	0.784937	0.908157	0.982131	0.981228	0.914113
MIR-590-5P;hsa-miR-590-5p|1x|4x	0	0	1	1	9	17	9	9	3377	5368	3591	6454	0	0	0.000184283	0.000114679	7.47405e-05	0.000653005	0.00115337	0.000781646	0.000643832	0.000807962	0.964955	0.992667	1.02584	0.958651	0.985528
KSHV-K12-2;NA	71431	83348	44437	62720	6983	7386	5513	6569	5314	6769	4291	8147	8.37573	8.82368	8.18897	7.19268	8.14527	0.506659	0.501104	0.478802	0.469926	0.489123	1.51844	1.25174	1.22581	1.21012	1.30153
MIR-297C-rno;NA	0	0	0	0	14	17	13	11	1019	1911	1409	2400	0	0	0	0	0	0.00101579	0.00115337	0.00112904	0.000786905	0.00102128	0.291172	0.353388	0.402508	0.356486	0.350889
MIR-101;hsa-miR-101-3p|1x|4x	2216	3129	1525	2251	3123	3386	3007	3382	315	410	285	286	0.25984	0.331253	0.281031	0.258143	0.282567	0.226593	0.229723	0.261157	0.241938	0.239853	0.0900091	0.0758184	0.0814158	0.0424813	0.0724312
MIR-682;NA	7783	8696	4595	6882	218081	239331	182325	222732	5475	8759	5351	10721	0.912606	0.920606	0.846779	0.789222	0.867303	15.8231	16.2374	15.8348	15.9335	15.9572	1.56444	1.61974	1.52862	1.59245	1.57631
MIR-877;NA	978	1089	590	1104	19809	22595	15681	19903	5147	7665	3854	6893	0.114677	0.115288	0.108727	0.126606	0.116324	1.43726	1.53296	1.36189	1.4238	1.43898	1.47072	1.41744	1.10097	1.02386	1.25325
MIR-743A-rno;NA	2282	5462	1844	1721	4143	4580	3444	4199	6294	8177	5583	10453	0.267579	0.578237	0.339817	0.197363	0.345749	0.3006	0.31073	0.29911	0.300383	0.302706	1.79847	1.51212	1.59489	1.55265	1.61453
MGHV-M1-9;NA	449	796	286	479	2255	2145	1691	2045	2979	4881	3701	7103	0.0526481	0.0842689	0.0527049	0.0549313	0.0611383	0.163614	0.145528	0.146863	0.146293	0.150574	0.851229	0.902609	1.05726	1.05505	0.966538
KSHV-K12-10B;NA	68	74	42	50	55	77	60	61	941	1824	1419	2308	0.00797343	0.00783405	0.00773987	0.00573396	0.00732033	0.00399059	0.00522407	0.00521097	0.00436375	0.00469734	0.268884	0.3373	0.405365	0.342821	0.338592
SV40-S1-5P;NA	56	81	32	56	2407	2635	2006	2375	7235	12361	7422	13872	0.00656635	0.0085751	0.00589705	0.00642204	0.00686513	0.174643	0.178772	0.17422	0.1699	0.174384	2.06735	2.28583	2.12024	2.06049	2.13348
MIR-602;NA	33	57	27	29	5097	5854	3912	4930	2703	4353	2570	5445	0.00386946	0.00603433	0.00497563	0.0033257	0.00455128	0.369819	0.397165	0.339756	0.352677	0.364854	0.772364	0.80497	0.73417	0.808778	0.780071
KSHV-K12-11;NA	1744	3537	1342	1877	7173	7192	6059	7230	634	849	678	1191	0.204495	0.374446	0.247307	0.215253	0.260375	0.520445	0.487942	0.526222	0.517211	0.512955	0.181161	0.157	0.193684	0.176906	0.177188
MIR-638;NA	9976	13529	6535	9092	2098	2311	1259	1875	1538	2368	1067	2208	1.16975	1.43225	1.20429	1.04266	1.21224	0.152223	0.15679	0.109344	0.134132	0.138122	0.439473	0.437898	0.304809	0.327967	0.377537
MIR-93;NA	121	215	60	117	738	776	561	744	1777	2372	1854	3177	0.014188	0.0227611	0.011057	0.0134175	0.0153559	0.0535464	0.0526478	0.0487226	0.0532234	0.0520351	0.507766	0.438637	0.529631	0.471898	0.486983
RLCV-5-5P;NA	1661	1872	1028	1879	6698	7660	5455	6598	7497	10430	7157	14875	0.194763	0.19818	0.189443	0.215482	0.199467	0.485981	0.519693	0.473764	0.472	0.48786	2.14222	1.92875	2.04454	2.20947	2.08124
MIR-720;NA	7596	11583	5508	9075	14631	16175	11592	14428	8349	13517	8373	15400	0.890679	1.22624	1.01503	1.04071	1.04317	1.06157	1.09739	1.00676	1.03213	1.04946	2.38567	2.4996	2.39191	2.28745	2.39116
MIR-561;NA	21	17	10	11	714	747	569	693	1113	1612	1140	1892	0.00246238	0.00179971	0.00184283	0.00126147	0.0018416	0.0518051	0.0506803	0.0494174	0.049575	0.0503694	0.318032	0.298096	0.325663	0.28103	0.305705
MIR-99B;hsa-miR-99b-5p|1x|5x	14620	16383	8508	13302	13872	13154	10281	12529	206	364	180	272	1.71429	1.73439	1.56788	1.52546	1.63551	1.0065	0.892434	0.8929	0.896285	0.92203	0.0588631	0.067312	0.0514205	0.0404018	0.0544993
MIR-196A;NA	2210	3088	1409	2453	1669	1922	1367	1634	2902	4058	2641	5060	0.259136	0.326913	0.259654	0.281308	0.281753	0.121096	0.130398	0.118723	0.116891	0.121777	0.829227	0.750418	0.754453	0.751592	0.771422
MIR-565;NA	863	1062	564	898	1895	2034	1562	1858	866	1429	1132	2060	0.101192	0.112429	0.103935	0.102982	0.105135	0.137494	0.137997	0.135659	0.132915	0.136016	0.247454	0.264255	0.323378	0.305984	0.285268
RLCV-13;NA	340	484	202	349	1236	1389	1000	1224	3586	4600	3463	6478	0.0398671	0.0512389	0.0372251	0.040023	0.0420885	0.0896794	0.0942368	0.0868496	0.0875611	0.0895817	1.02468	0.850646	0.989273	0.962215	0.956703
MIR-204;NA	440	581	239	342	1301	1343	1127	1396	1325	2277	1945	3827	0.0515928	0.0615078	0.0440436	0.0392203	0.0490911	0.0943955	0.0911159	0.0978795	0.0998654	0.0958141	0.37861	0.42107	0.555627	0.568447	0.480938
MIR-453-hsa;NA	1793	2700	1231	2026	126	161	106	143	10842	15793	8370	17798	0.210241	0.285837	0.226852	0.23234	0.238817	0.00914207	0.0109231	0.00920605	0.0102298	0.00987524	3.09803	2.92049	2.39105	2.64364	2.7633
KSHV-K12-7;NA	14	48	20	26	2855	3240	2222	2828	10314	16958	9261	17217	0.00164159	0.00508154	0.00368565	0.00298166	0.00334761	0.207148	0.219818	0.19298	0.202306	0.205563	2.94716	3.13592	2.64558	2.55734	2.8215
MIR-345-5P;NA	1	0	0	0	21	17	12	18	453	762	726	1593	0.000117256	0	0	0	2.93141e-05	0.00152368	0.00115337	0.00104219	0.00128766	0.00125173	0.129442	0.140911	0.207396	0.236618	0.178592
MIR-687;NA	1023	1690	777	1012	8797	9511	7119	8736	2859	5061	3491	7597	0.119953	0.178913	0.143188	0.116055	0.139527	0.638276	0.645274	0.618282	0.624946	0.631695	0.81694	0.935896	0.997272	1.12843	0.969634
MIR-683;NA	2906	3950	1912	3115	2006	2133	1676	1978	3748	6958	5065	8859	0.340747	0.418169	0.352349	0.357226	0.367122	0.145548	0.144714	0.14556	0.1415	0.14433	1.07097	1.28669	1.44692	1.31588	1.28011
MIR-293-3P-rno;NA	4	0	2	0	13	12	14	17	2164	3928	2816	4828	0.000469025	0	0.000368565	0	0.000209398	0.00094323	0.000814141	0.00121589	0.00121613	0.00104735	0.618349	0.726378	0.804445	0.717131	0.716576
MIR-191;hsa-miR-191-5p|1x|8x	1561	2334	978	1633	136889	146619	113145	139946	879	1247	1112	1967	0.183037	0.24709	0.180228	0.187271	0.199407	9.93214	9.94738	9.82659	10.0113	9.92935	0.251168	0.230599	0.317664	0.29217	0.2729
MIR-322;NA	0	0	0	0	38	24	21	19	33	35	25	44	0	0	0	0	0	0.00275713	0.00162828	0.00182384	0.0013592	0.00189211	0.00942953	0.00647231	0.00714174	0.00653558	0.00739479
MIR-326;NA	6	6	4	7	198	175	128	189	1025	2012	1427	2783	0.000703538	0.000635193	0.000737131	0.000802754	0.000719654	0.0143661	0.0118729	0.0111167	0.0135205	0.0127191	0.292887	0.372065	0.40765	0.413375	0.371494
MIR-551B;hsa-miR-551b-3p|1x|1x	0	0	0	0	78	92	48	78	1399	2626	1926	3797	0	0	0	0	0	0.00565938	0.00624175	0.00416878	0.00557987	0.00541244	0.399755	0.485608	0.550199	0.563991	0.499888
MIR-105-hsa;NA	212	372	152	245	7046	7917	5743	6872	3313	4352	3193	6590	0.0248583	0.039382	0.028011	0.0280964	0.0300869	0.51123	0.537129	0.498777	0.491601	0.509685	0.946668	0.804785	0.912142	0.978851	0.910612
MIR-466A-5P;NA	46	36	11	24	552	615	546	592	3619	5078	3696	7012	0.00539379	0.00381116	0.00202711	0.0027523	0.00349609	0.040051	0.0417247	0.0474199	0.0423498	0.0428863	1.03411	0.939039	1.05583	1.04153	1.01763
MIR-603;NA	1506	1692	918	1781	1455	1501	1257	1411	617	1069	909	1760	0.176588	0.179124	0.169172	0.204244	0.182282	0.105569	0.101835	0.10917	0.100938	0.104378	0.176304	0.197683	0.259673	0.261423	0.223771
MIR-96;hsa-miR-96|1x|1.5x	615	801	408	678	503	533	404	503	327	466	491	901	0.0721126	0.0847983	0.0751873	0.0777525	0.0774627	0.0364957	0.0361614	0.0350872	0.035983	0.0359319	0.0934381	0.0861741	0.140264	0.133831	0.113427
MIR-454_1;NA	86	162	54	87	3735	4049	3055	3706	7608	9861	6426	12003	0.010084	0.0171502	0.00995127	0.00997709	0.0117907	0.270997	0.274705	0.265325	0.265116	0.269036	2.17394	1.82353	1.83571	1.78288	1.90401
MIR-142-5P;hsa-miR-142-5p|5x|1x	109	169	72	104	13475	14602	11623	13709	4692	7002	4908	9071	0.0127809	0.0178913	0.0132684	0.0119266	0.0139668	0.977694	0.990674	1.00945	0.980699	0.98963	1.34071	1.29483	1.40207	1.34737	1.34624
MIR-448;NA	8692	11055	6044	9778	11631	12257	10575	11699	6135	8785	5686	11117	1.01919	1.17034	1.1138	1.12133	1.10617	0.8439	0.831577	0.918434	0.83691	0.857705	1.75304	1.62455	1.62432	1.65127	1.66329
MIR-184;hsa-miR-184|1x|1.5x	215635	194801	136458	225156	34854	40400	31087	36608	5235	7582	4927	8987	25.2846	20.6227	25.1469	25.8207	24.2187	2.52887	2.74094	2.69989	2.61882	2.64713	1.49587	1.40209	1.40749	1.33489	1.41008
MIR-551A;NA	173	207	97	197	67	79	54	72	927	1791	1381	2475	0.0202853	0.0219142	0.0178754	0.0225918	0.0206667	0.00486126	0.00535976	0.00468988	0.00515065	0.00501539	0.264884	0.331197	0.394509	0.367626	0.339554
MIR-721;NA	10	11	3	15	231	262	207	251	606	976	595	1151	0.00117256	0.00116452	0.000552848	0.00172019	0.00115253	0.0167605	0.0177754	0.0179779	0.0179557	0.0176174	0.17316	0.180485	0.169973	0.170965	0.173646
MIR-291B-5P-mmu;NA	120	148	62	91	175	193	138	186	2373	3774	2875	5291	0.0140708	0.0156681	0.0114255	0.0104358	0.0129	0.0126973	0.0130941	0.0119852	0.0133059	0.0127706	0.678069	0.6979	0.8213	0.785903	0.745793
MIR-210;hsa-miR-210-3p|4x|1x	23	37	15	33	910	963	786	847	3743	5902	3346	5839	0.00269689	0.00391702	0.00276424	0.00378441	0.00329064	0.0660261	0.0653348	0.0682638	0.0605917	0.0650541	1.06954	1.09142	0.95585	0.867301	0.996026
MIR-562;NA	2055	3249	1485	2311	4386	4750	3840	4331	3612	5688	3703	7104	0.240962	0.343957	0.27366	0.265024	0.280901	0.318231	0.322264	0.333502	0.309826	0.320956	1.0321	1.05184	1.05783	1.0552	1.04924
MIR-300-3P;NA	2487	2953	1586	2619	8514	8980	6999	8656	7017	11182	7134	13670	0.291616	0.312621	0.292272	0.300345	0.299214	0.617743	0.609249	0.60786	0.619223	0.613519	2.00506	2.06781	2.03797	2.03049	2.03533
MIR-566;NA	140	209	89	145	32	30	35	22	915	1769	1269	2209	0.0164159	0.0221259	0.0164012	0.0166285	0.0178929	0.0023218	0.00203535	0.00303973	0.00157381	0.00224267	0.261455	0.327129	0.362514	0.328116	0.319804
RLCV-10;NA	247374	205428	136166	211199	89447	94305	68740	85417	4037	5733	4143	7660	29.0062	21.7477	25.093	24.2201	25.0168	6.48993	6.39813	5.97004	6.11046	6.24214	1.15355	1.06016	1.18353	1.13778	1.13376
MIR-450B-5P-mmu;NA	4941	7063	3429	4847	12865	13761	11575	13393	3253	4104	2848	5385	0.579363	0.747728	0.631905	0.55585	0.628712	0.933435	0.933616	1.00528	0.958093	0.957607	0.929523	0.758924	0.813586	0.799866	0.825475
EBV-8-5P;NA	1145	1538	687	1150	17202	18661	14796	17088	276	300	335	374	0.134258	0.162821	0.126602	0.131881	0.138891	1.24811	1.26606	1.28503	1.22242	1.2554	0.0788652	0.0554769	0.0956993	0.0555524	0.0713984
MIR-292-5P;NA	57692	59378	32442	57313	509	579	409	531	4155	5477	3204	6517	6.76475	6.28608	5.9785	6.57261	6.40048	0.0369311	0.0392823	0.0355215	0.0379861	0.0374302	1.18726	1.01282	0.915285	0.968008	1.02085
MIR-140-5P;hsa-miR-140-5p|1x|5x	565	981	367	445	184	205	169	182	4887	7783	4772	9478	0.0662498	0.103854	0.0676318	0.0510322	0.072192	0.0133503	0.0139082	0.0146776	0.0130197	0.013739	1.39643	1.43926	1.36321	1.40782	1.40168
MIR-201;NA	36	59	34	45	2612	2765	2280	2734	1744	2493	2122	3855	0.00422123	0.00624606	0.00626561	0.00516056	0.00547337	0.189517	0.187592	0.198017	0.195582	0.192677	0.498336	0.461013	0.60619	0.572606	0.534536
MIR-376A;NA	1	1	1	1	53	57	43	50	925	1570	1292	2196	0.000117256	0.000105865	0.000184283	0.000114679	0.000130521	0.00384547	0.00386717	0.00373453	0.00357684	0.003756	0.264313	0.290329	0.369085	0.326185	0.312478
MIR-1;hsa-miR-1|8x|1x	496	664	290	498	0	5	1	4	973	1524	1192	2041	0.0581591	0.0702947	0.053442	0.0571102	0.0597515	0	0.000339225	8.68496e-05	0.000286147	0.000178056	0.278028	0.281823	0.340518	0.303162	0.300883
MIR-449B-mmu;NA	29	55	26	40	1467	1581	1213	1376	721	1246	800	1544	0.00340043	0.0058226	0.00479135	0.00458717	0.00465039	0.10644	0.107263	0.105349	0.0984347	0.104372	0.206021	0.230414	0.228536	0.229339	0.223577
MIR-688;NA	653	1097	428	632	4142	4645	3490	4190	5744	8216	5225	9607	0.0765684	0.116134	0.078873	0.0724773	0.0860133	0.300527	0.31514	0.303105	0.299739	0.304628	1.64131	1.51933	1.49262	1.42698	1.52006
MIR-291B-3P-mmu;NA	6	9	2	6	110	142	116	113	3229	5677	4150	7557	0.000703538	0.000952789	0.000368565	0.000688075	0.000678242	0.00798117	0.009634	0.0100745	0.00808366	0.00894335	0.922665	1.04981	1.18553	1.12249	1.07012
MIR-680;NA	2086	2640	1237	1669	644	678	512	650	3451	5963	2997	6331	0.244597	0.279485	0.227958	0.1914	0.23586	0.0467261	0.045999	0.044467	0.046499	0.0459228	0.9861	1.1027	0.856151	0.940381	0.971332
MIR-684;NA	1	4	1	3	46	53	55	56	3704	6737	4309	8401	0.000117256	0.000423462	0.000184283	0.000344038	0.00026726	0.00333758	0.00359579	0.00477673	0.00400606	0.00392904	1.05839	1.24583	1.23095	1.24785	1.19575
MIR-302A-star;NA	33027	45259	22038	26906	3323	3663	2856	3162	6254	8137	5767	10680	3.87262	4.79137	4.06122	3.08556	3.95269	0.241104	0.248516	0.248042	0.2262	0.240966	1.78704	1.50472	1.64746	1.58636	1.63139
MIR-320A;hsa-miR-320a|1x|1.5x	901	1470	636	904	816	857	716	844	4164	6198	3635	6508	0.105648	0.155622	0.117204	0.10367	0.120536	0.0592058	0.0581432	0.0621843	0.0603771	0.0599776	1.18984	1.14615	1.03841	0.966671	1.08527
MIR-465B-5P;NA	26340	29824	16296	25187	3348	3398	2888	3433	3000	3455	2297	4228	3.08853	3.15733	3.00307	2.88843	3.03434	0.242918	0.230538	0.250822	0.245586	0.242466	0.85723	0.638909	0.656183	0.62801	0.695083
MIR-892A;NA	15064	16009	8959	14701	107576	115238	85899	107598	863	1151	862	1421	1.76635	1.6948	1.65099	1.6859	1.69951	7.8053	7.81833	7.46029	7.69722	7.69529	0.246596	0.212846	0.246247	0.211069	0.22919
MIR-205;hsa-miR-205-5p|1x|2x	90	159	48	79	4232	4953	3364	4063	3382	5471	3687	7945	0.0105531	0.0168326	0.00884557	0.00905966	0.0113227	0.307058	0.336037	0.292162	0.290654	0.306478	0.966384	1.01171	1.05326	1.18012	1.05287
MIR-604;NA	3259	3940	2183	3871	221771	237996	189094	226137	3152	5872	3912	6822	0.382138	0.41711	0.402289	0.443923	0.411365	16.0908	16.1469	16.4227	16.1771	16.2094	0.900663	1.08587	1.11754	1.01331	1.02935
EBV-3-5P;NA	325	456	194	299	18920	19414	16173	19069	5743	8570	5646	11609	0.0381083	0.0482747	0.0357508	0.0342891	0.0391057	1.37276	1.31714	1.40462	1.36414	1.36467	1.64102	1.58479	1.61289	1.72435	1.64076
MIR-600;NA	3050	5014	2156	2806	12377	13094	10603	12792	4551	7136	4448	8745	0.357632	0.53081	0.397314	0.32179	0.401886	0.898027	0.888363	0.920866	0.915099	0.905589	1.30042	1.31961	1.27066	1.29895	1.29741
MIR-214;hsa-miR-214|1x|4x	0	1	0	0	108	113	72	95	4069	6721	4129	8626	0	0.000105865	0	0	2.64664e-05	0.00783606	0.00766649	0.00625317	0.006796	0.00713793	1.16269	1.24287	1.17953	1.28127	1.21659
MIR-608;NA	19	33	7	4	30	24	25	25	628	1001	640	1043	0.00222787	0.00349356	0.00128998	0.000458717	0.00186753	0.00217668	0.00162828	0.00217124	0.00178842	0.00194116	0.179447	0.185108	0.182828	0.154923	0.175577
MIR-878-5P-rno;NA	9112	13165	6430	9954	11903	12925	10381	12358	4091	5516	3798	6451	1.06844	1.39372	1.18494	1.14152	1.19715	0.863636	0.876897	0.901585	0.884052	0.881543	1.16898	1.02004	1.08497	0.958205	1.05805
MIR-499-5P;hsa-miR-499a-5p|1x|1x	1204	1976	777	980	530	604	474	469	1883	2210	1662	2843	0.141177	0.20919	0.143188	0.112386	0.151485	0.0384547	0.0409784	0.0411667	0.0335508	0.0385377	0.538055	0.40868	0.474783	0.422287	0.460951
MIR-767-5P;NA	2039	3055	1288	2028	75494	84937	61810	75010	4122	6639	5054	10046	0.239086	0.323419	0.237356	0.232569	0.258108	5.47755	5.76256	5.36817	5.36598	5.49356	1.17783	1.2277	1.44377	1.49219	1.33538
EBV-19-3P;NA	4069	5896	2892	4399	2792	3277	2429	2923	2961	3982	2767	5177	0.477116	0.624183	0.532946	0.504474	0.53468	0.202577	0.222328	0.210958	0.209102	0.211241	0.846086	0.736364	0.790447	0.76897	0.785467
MIR-491-3P;NA	8	19	6	15	304	287	248	280	887	944	804	1390	0.00093805	0.00201144	0.0011057	0.00172019	0.00144384	0.0220571	0.0194715	0.0215387	0.0200303	0.0207744	0.253454	0.174567	0.229678	0.206465	0.216041
MIR-95;NA	321	576	269	378	245	318	209	275	861	993	805	1253	0.0376393	0.0609785	0.0495721	0.0433487	0.0478846	0.0177763	0.0215747	0.0181516	0.0196726	0.0192938	0.246025	0.183629	0.229964	0.186115	0.211433
MIR-218;hsa-miR-218-5p|4x|1x	318	572	266	337	43	49	42	45	247	378	271	369	0.0372875	0.0605551	0.0490192	0.0386469	0.0463772	0.00311991	0.00332441	0.00364768	0.00321916	0.00332779	0.0705786	0.0699009	0.0774164	0.0548097	0.0681764
MIR-20A-star;NA	3	2	1	3	166	190	130	181	1929	3599	3140	5813	0.000351769	0.000211731	0.000184283	0.000344038	0.000272955	0.0120443	0.0128906	0.0112904	0.0129482	0.0122934	0.551199	0.665538	0.897002	0.863439	0.744294
MIR-615-5P;NA	2	1	2	2	55079	61612	44480	57993	4793	7422	4275	8670	0.000234513	0.000105865	0.000368565	0.000229358	0.000234575	3.99632	4.18007	3.86307	4.14864	4.04702	1.36957	1.3725	1.22124	1.28781	1.31278
MIR-547-rno;NA	2637	3742	1858	3147	468	474	447	497	990	1407	1393	2561	0.309205	0.396149	0.342397	0.360895	0.352162	0.0339563	0.0321586	0.0388218	0.0355538	0.0351226	0.282886	0.260187	0.397937	0.3804	0.330353
MIR-563;NA	2	0	0	0	312	337	199	293	1374	2643	1688	3082	0.000234513	0	0	0	5.86281e-05	0.0226375	0.0228638	0.0172831	0.0209603	0.0209362	0.392611	0.488752	0.48221	0.457788	0.45534
MIR-567;NA	46	79	29	54	2445	2343	1946	2319	2618	4554	2852	5412	0.00539379	0.00836337	0.0053442	0.00619268	0.00632351	0.1774	0.158961	0.169009	0.165894	0.167816	0.748076	0.84214	0.814729	0.803876	0.802205
MIR-519D;NA	143	190	88	136	232	264	184	239	3156	4650	3437	6417	0.0167676	0.0201144	0.0162169	0.0155964	0.0171738	0.016833	0.0179111	0.0159803	0.0170973	0.0169554	0.901806	0.859892	0.981846	0.953155	0.924175
MIR-878-3P-rno;NA	51	111	34	54	101	101	91	102	3162	4950	3215	6676	0.00598007	0.0117511	0.00626561	0.00619268	0.00754736	0.00732817	0.00685235	0.00790331	0.00729676	0.00734515	0.90352	0.915369	0.918427	0.991625	0.932236
RLCV-15;NA	3274	4657	2022	3079	323	278	217	252	1693	2173	1547	2705	0.383897	0.493016	0.37262	0.353097	0.400657	0.0234356	0.0188609	0.0188464	0.0180273	0.0197925	0.483763	0.401838	0.441931	0.40179	0.43233
MIR-28-5P;hsa-miR-28-5p|10x|1x	275	408	162	268	4508	4793	3540	4250	2897	5041	3145	6167	0.0322455	0.0431931	0.0298538	0.030734	0.0340066	0.327083	0.325181	0.307447	0.304032	0.315936	0.827798	0.932197	0.89843	0.916021	0.893612
MIR-323-5P;NA	31250	37813	19840	37287	5441	6362	4331	5429	2707	4499	2730	5880	3.66426	4.00309	3.65617	4.27604	3.89989	0.394778	0.43163	0.376145	0.388374	0.397732	0.773507	0.831969	0.779877	0.873391	0.814686
MIR-206;NA	39985	36493	21906	32877	8	11	6	6	4481	6308	3920	7868	4.68849	3.86335	4.0369	3.77031	4.08976	0.000580449	0.000746296	0.000521097	0.000429221	0.000569266	1.28042	1.16649	1.11982	1.16868	1.18385
MIR-33A;hsa-miR-33a-5p|8x|1x	1	4	0	3	63	74	51	55	213	384	197	387	0.000117256	0.000423462	0	0.000344038	0.000221189	0.00457104	0.00502053	0.00442933	0.00393453	0.00448886	0.0608633	0.0710104	0.0562769	0.0574834	0.0614085
MIR-339-3P-rno;NA	58	83	27	48	1664	1813	1353	1669	3216	5855	4398	8272	0.00680086	0.00878684	0.00497563	0.0055046	0.00651698	0.120733	0.123003	0.117507	0.119395	0.12016	0.91895	1.08272	1.25637	1.22869	1.12168
MIR-23B;hsa-miR-23b-3p|1x|3x	21	35	15	19	770	881	688	817	2141	3194	2207	4546	0.00246238	0.00370529	0.00276424	0.0021789	0.0027777	0.0558682	0.0597715	0.0597525	0.0584456	0.0584595	0.611776	0.590644	0.630472	0.675244	0.627034
MIR-376B;NA	19	19	8	14	854	936	823	921	1940	2352	2167	3813	0.00222787	0.00201144	0.00147426	0.00160551	0.00182977	0.0619629	0.063503	0.0714772	0.0658854	0.0657071	0.554342	0.434939	0.619046	0.566367	0.543673
HCMV-US25-1;NA	15553	21603	10986	17566	157306	167868	129984	162052	3247	5219	3171	6364	1.82369	2.28701	2.02453	2.01445	2.03742	11.4135	11.389	11.2891	11.5927	11.4211	0.927809	0.965113	0.905858	0.945282	0.936015
MIR-681;NA	14	27	10	7	722	811	669	698	11369	18694	12012	23800	0.00164159	0.00285837	0.00184283	0.000802754	0.00178638	0.0523855	0.0550223	0.0581024	0.0499327	0.0538607	3.24862	3.45695	3.43146	3.53515	3.41805
MIR-685;NA	464	758	327	523	42372	45505	38637	43664	4601	6321	3968	6518	0.0544069	0.080246	0.0602604	0.0599772	0.0637227	3.07435	3.08729	3.35561	3.12358	3.16021	1.3147	1.1689	1.13354	0.968157	1.14632
MIR-689;NA	0	0	0	0	26	17	13	13	586	1164	831	1527	0	0	0	0	0	0.00188646	0.00115337	0.00112904	0.000929979	0.00127471	0.167446	0.21525	0.237391	0.226814	0.211725
MIR-325-5P-hsa;NA	0	12	4	7	12	15	14	13	52	81	69	94	0	0.00127039	0.000737131	0.000802754	0.000702568	0.000870674	0.00101768	0.00121589	0.000929979	0.00100856	0.0148587	0.0149788	0.0197112	0.0139624	0.0158777
MIR-615-3P;hsa-miR-615-3p|1x|1x	30616	39399	20556	28292	5043	5108	4198	5173	3787	6336	4729	10261	3.58992	4.17099	3.78812	3.2445	3.69838	0.365901	0.346553	0.364594	0.37006	0.361777	1.08211	1.17167	1.35093	1.52413	1.28221
EBV-14-3P;NA	34	76	22	48	2315	2489	2076	2574	765	985	809	1219	0.00398671	0.00804578	0.00405422	0.0055046	0.00539783	0.167967	0.168866	0.1803	0.184136	0.175317	0.218594	0.182149	0.231107	0.181065	0.203229
MIR-466B-5P-rno;NA	549	763	349	592	10936	11858	9476	10997	3047	4036	3021	5163	0.0643737	0.0807754	0.0643147	0.0678901	0.0693385	0.793474	0.804507	0.822986	0.786691	0.801914	0.87066	0.746349	0.863007	0.766891	0.811727
MIR-509-5P-rno;NA	19	39	12	19	71	80	72	78	2022	3214	2387	4637	0.00222787	0.00412875	0.00221139	0.0021789	0.00268673	0.00515149	0.00542761	0.00625317	0.00557987	0.00560303	0.577773	0.594343	0.681893	0.688761	0.635692
MIR-892B;NA	428	782	284	459	625	694	543	624	760	1211	1007	1789	0.0501857	0.0827868	0.0523363	0.0526378	0.0594866	0.0453476	0.0470845	0.0471593	0.044639	0.0460576	0.217165	0.223942	0.287669	0.265731	0.248627
MIR-219-5P;NA	0	1	0	1	5	1	1	5	8	28	13	20	0	0.000105865	0	0.000114679	5.51362e-05	0.000362781	6.78451e-05	8.68496e-05	0.000357684	0.00021879	0.00228595	0.00517785	0.0037137	0.00297072	0.00353705
MIR-181D;NA	1586	2455	1098	1646	20122	21865	16995	20837	1708	2460	1806	3596	0.185968	0.2599	0.202342	0.188762	0.209243	1.45997	1.48343	1.47601	1.49061	1.47751	0.48805	0.454911	0.515919	0.534135	0.498254
MIR-211-hsa;hsa-miR-211-5p|1x|5x	519	753	330	371	3382	3581	2478	3230	2292	3985	2945	5650	0.060856	0.0797167	0.0608133	0.042546	0.060983	0.245385	0.242953	0.215213	0.231064	0.233654	0.654924	0.736918	0.841296	0.839228	0.768092
MIR-605;NA	35	85	24	55	593	715	538	658	3036	5008	3385	5899	0.00410397	0.00899857	0.00442279	0.00630736	0.00595817	0.0430258	0.0485092	0.0467251	0.0470712	0.0463328	0.867517	0.926095	0.966991	0.876213	0.909204
MIR-601;NA	4789	5171	2913	4975	2511	2782	2336	2608	18195	26096	13302	25960	0.56154	0.54743	0.536816	0.570529	0.554079	0.182188	0.188745	0.202881	0.186568	0.190096	5.1991	4.82575	3.79997	3.85599	4.4202
MIR-518A-5P;NA	9	5	2	1	250	274	183	249	2932	5083	3024	6161	0.00105531	0.000529327	0.000368565	0.000114679	0.00051697	0.018139	0.0185895	0.0158935	0.0178127	0.0176087	0.837799	0.939964	0.863864	0.91513	0.889189
MIR-609;NA	4	0	6	0	301	338	261	275	1546	2779	1764	2779	0.000469025	0	0.0011057	0	0.00039368	0.0218394	0.0229316	0.0226677	0.0196726	0.0217778	0.441759	0.513901	0.503921	0.412781	0.468091
MIR-325-3P-hsa;NA	12	29	12	11	3377	3405	3001	3239	1680	2035	1725	3121	0.00140708	0.0030701	0.00221139	0.00126147	0.00198751	0.245022	0.231012	0.260636	0.231708	0.242094	0.480049	0.376318	0.49278	0.46358	0.453182
EBV-2-3P;NA	1357	2490	984	1436	969	1107	871	977	5094	6865	4135	9098	0.159117	0.263605	0.181334	0.164679	0.192184	0.0703069	0.0751045	0.075646	0.0698915	0.0727372	1.45558	1.2695	1.18124	1.35138	1.31442
MIR-28-3P;hsa-miR-28-3p|8x|1x	13643	19059	9718	12041	181976	185480	149543	192249	1371	1813	1401	2997	1.59973	2.01769	1.79086	1.38085	1.69728	13.2035	12.5839	12.9877	13.7529	13.132	0.391754	0.335265	0.400223	0.445162	0.393101
MIR-519C-3P;NA	9	5	2	3	1216	1290	1087	1289	2246	3416	2315	4873	0.00105531	0.000529327	0.000368565	0.000344038	0.000574309	0.0882283	0.0875201	0.0944055	0.092211	0.0905912	0.641779	0.631697	0.661325	0.723815	0.664654
MIR-330-3P;NA	250	495	173	277	505	531	422	582	3596	5680	3565	7106	0.0293141	0.0524034	0.0318809	0.0317661	0.0363411	0.0366408	0.0360257	0.0366505	0.0416344	0.0377379	1.02753	1.05036	1.01841	1.0555	1.03795
MIR-346-hsa;hsa-miR-346|8x|1x	1417	2290	933	1462	1302	1329	1046	1215	1341	2625	2365	3856	0.166152	0.242432	0.171936	0.167661	0.187045	0.0944681	0.0901661	0.0908446	0.0869173	0.090599	0.383182	0.485423	0.675608	0.572754	0.529242
MIR-190;hsa-miR-190a-5p|1x|1.5x	0	0	0	0	14	13	6	9	89	178	103	146	0	0	0	0	0	0.00101579	0.000881986	0.000521097	0.000643832	0.000765675	0.0254312	0.0329163	0.0294239	0.0216862	0.0273644
MIR-564;NA	139	241	94	195	7116	7927	5967	6956	3657	6125	3841	7895	0.0162986	0.0255136	0.0173226	0.0223624	0.0203743	0.516309	0.537808	0.518231	0.49761	0.51749	1.04496	1.13265	1.09726	1.17269	1.11189
MIR-568;NA	1	0	0	0	0	8	3	1	540	1079	826	1323	0.000117256	0	0	0	2.93141e-05	0	0.000542761	0.000260549	7.15368e-05	0.000218712	0.154301	0.199532	0.235963	0.196513	0.196577
MIR-203;NA	707	973	464	641	1340	1385	1117	1402	2925	4169	3087	6004	0.0829002	0.103007	0.0855072	0.0735094	0.086231	0.0972252	0.0939654	0.097011	0.100295	0.0971241	0.835799	0.770944	0.881861	0.891809	0.845104
MIR-291A-5P;NA	20	22	2	8	39	39	26	28	34	64	49	75	0.00234513	0.00232904	0.000368565	0.000917434	0.00149004	0.00282969	0.00264596	0.00225809	0.00200303	0.00243419	0.00971527	0.0118351	0.0139978	0.0111402	0.0116721
MIR-351-mmu;NA	2792	4014	1843	2718	59170	59857	47551	57442	919	1391	1381	2862	0.32738	0.424944	0.339633	0.311698	0.350914	4.29315	4.061	4.12978	4.10922	4.14829	0.262598	0.257228	0.394509	0.42511	0.334861
MIR-376C;NA	28	50	13	23	837	866	628	734	1032	1149	938	1374	0.00328318	0.00529327	0.00239568	0.00263762	0.00340244	0.0607295	0.0587538	0.0545415	0.052508	0.0566332	0.294887	0.212477	0.267958	0.204088	0.244852
MIR-550-star;NA	2	0	2	0	886	1035	761	898	1468	3149	2033	2881	0.000234513	0	0.000368565	0	0.00015077	0.0642847	0.0702196	0.0660925	0.0642401	0.0662092	0.419471	0.582323	0.580766	0.427932	0.502623
MIR-653-rno;NA	93	142	66	62	727	823	615	706	1869	2815	1929	3650	0.0109048	0.0150329	0.0121627	0.00711011	0.0113026	0.0527483	0.0558365	0.0534125	0.050505	0.0531256	0.534054	0.520558	0.551056	0.542156	0.536956
MIR-686;NA	102	180	84	109	87	103	87	92	12342	20363	11349	22971	0.0119601	0.0190558	0.0154797	0.0125	0.0147489	0.00631238	0.00698804	0.00755591	0.00658139	0.00685943	3.52664	3.76559	3.24206	3.41202	3.48658
MIR-24-1-star;NA	392	386	210	378	243	219	177	234	2783	4823	3864	8905	0.0459645	0.0408641	0.0386994	0.0433487	0.0422192	0.0176311	0.0148581	0.0153724	0.0167396	0.0161503	0.795224	0.891884	1.10383	1.32271	1.02841
MIR-128;hsa-mir-128-1-3p|1x|1x	54806	72825	36763	48600	14716	14556	11782	14146	5524	7545	4945	9405	6.42635	7.70965	6.77479	5.57341	6.62105	1.06774	0.987553	1.02326	1.01196	1.02263	1.57845	1.39524	1.41264	1.39698	1.44583
MIR-329;NA	16	44	16	17	86	86	72	76	272	437	481	814	0.0018761	0.00465808	0.00294852	0.00194955	0.00285806	0.00623983	0.00583468	0.00625317	0.0054368	0.00594112	0.0777222	0.0808114	0.137407	0.120908	0.104212
MIR-9;hsa-miR-9-5p|1x|1x	2268	3508	1595	2452	4378	4692	3972	4661	2848	3623	2464	4605	0.265937	0.371376	0.293931	0.281193	0.303109	0.317651	0.318329	0.344966	0.333433	0.328595	0.813797	0.669976	0.703889	0.684008	0.717918
MIR-155-hsa;hsa-miR-155-5p|5x|1x	7924	12010	5524	6918	6906	8037	5926	7097	822	950	735	1237	0.929139	1.27144	1.01798	0.793351	1.00298	0.501073	0.545271	0.514671	0.507697	0.517178	0.234881	0.175677	0.209967	0.183739	0.201066
MIR-501-5P;NA	34	52	25	51	89	107	91	102	5752	9075	5837	11625	0.00398671	0.00550501	0.00460707	0.00584864	0.00498686	0.0064575	0.00725942	0.00790331	0.00729676	0.00722925	1.6436	1.67818	1.66745	1.72673	1.67899
MIR-16;hsa-miR-16-5p|1x|5x	4	6	1	4	5165	5756	4174	5119	1428	2167	1600	2913	0.000469025	0.000635193	0.000184283	0.000458717	0.000436804	0.374752	0.390516	0.36251	0.366197	0.373494	0.408041	0.400728	0.457071	0.432685	0.424631
MIR-344-3P-mmu;NA	3308	4802	2355	3641	1155	1229	964	1114	4969	8501	5045	8640	0.387884	0.508366	0.433986	0.417547	0.436946	0.0838023	0.0833816	0.083723	0.079692	0.0826497	1.41986	1.57203	1.4412	1.28335	1.42911
MIR-606;NA	530	955	341	461	2425	2649	2127	2595	3490	5487	3975	8143	0.0621458	0.101102	0.0628404	0.0528671	0.0697387	0.175949	0.179722	0.184729	0.185638	0.181509	0.997244	1.01467	1.13554	1.20953	1.08925
MIR-890;NA	20	31	13	15	601	617	404	510	561	749	648	1103	0.00234513	0.00328183	0.00239568	0.00172019	0.0024357	0.0436062	0.0418604	0.0350872	0.0364838	0.0392594	0.160302	0.138507	0.185114	0.163835	0.16194
MIR-455-3P-hsa;hsa-miR-455-3p|2x|1x	7	17	2	15	131	161	94	141	2747	5465	4175	9362	0.000820794	0.00179971	0.000368565	0.00172019	0.00117732	0.00950485	0.0109231	0.00816386	0.0100867	0.00966962	0.784937	1.0106	1.19267	1.39059	1.0947
MIR-466G;NA	285	502	192	214	1404	1391	1231	1369	2675	4400	3248	5789	0.033418	0.0531445	0.0353823	0.0245413	0.0366215	0.101869	0.0943725	0.106912	0.0979339	0.100272	0.764363	0.813661	0.927854	0.859874	0.841438
MIR-569;NA	2870	4547	2051	2982	34929	37383	30419	34744	5235	7797	4634	9080	0.336526	0.48137	0.377964	0.341973	0.384458	2.53431	2.53625	2.64188	2.48548	2.54948	1.49587	1.44184	1.32379	1.34871	1.40255
MIR-294-3P-mmu;NA	97	117	68	71	109	132	80	107	7735	11436	6668	13517	0.0113739	0.0123863	0.0125312	0.00814222	0.0111084	0.00790862	0.00895555	0.00694797	0.00765444	0.00786664	2.21022	2.11478	1.90484	2.00776	2.0594
MIR-432-star;NA	43	67	30	29	9090	9287	7449	8989	3392	6600	4793	8114	0.00504202	0.00709299	0.00552848	0.0033257	0.0052473	0.659535	0.630077	0.646942	0.643045	0.6449	0.969241	1.22049	1.36921	1.20522	1.19104
MIR-651;NA	876	1097	508	826	259	245	230	274	222	261	176	195	0.102717	0.116134	0.0936156	0.094725	0.101798	0.018792	0.016622	0.0199754	0.0196011	0.0187476	0.063435	0.0482649	0.0502778	0.0289645	0.0477356
MIR-517-star;NA	2391	2573	1375	2551	70094	74260	57016	70724	4320	6668	5275	11957	0.28036	0.272392	0.253389	0.292547	0.274672	5.08575	5.03817	4.95181	5.05937	5.03378	1.23441	1.23307	1.50691	1.77604	1.43761
MIR-492;NA	11123	14919	7661	11633	11153	12414	9269	11073	7016	10958	7063	14809	1.30424	1.57941	1.41179	1.33406	1.40738	0.809218	0.842229	0.805009	0.792128	0.812146	2.00478	2.02639	2.01768	2.19967	2.06213
MIR-449B-hsa;hsa-miR-449b|1x|8x	246	366	171	234	10638	11527	8957	10714	2012	3331	2260	5050	0.028845	0.0387468	0.0315123	0.0268349	0.0314848	0.771852	0.78205	0.777912	0.766446	0.774565	0.574916	0.615979	0.645613	0.750106	0.646653
MIR-593-star;NA	154	249	108	109	40	50	49	50	245	413	392	749	0.0180575	0.0263605	0.0199025	0.0125	0.0192051	0.00290225	0.00339225	0.00425563	0.00357684	0.00353174	0.0700071	0.0763732	0.111982	0.111253	0.092404
MIR-429-hsa;NA	677	1415	541	590	1301	1335	1137	1277	4990	7702	4844	9274	0.0793825	0.1498	0.0996969	0.0676607	0.099135	0.0943955	0.0905732	0.098748	0.0913526	0.0937673	1.42586	1.42428	1.38378	1.37752	1.40286
MIR-540-5P;NA	0	0	1	0	1	3	3	4	24	44	31	51	0	0	0.000184283	0	4.60707e-05	7.25561e-05	0.000203535	0.000260549	0.000286147	0.000205697	0.00685784	0.00813661	0.00885575	0.00757533	0.00785638
MIR-466E-5P;NA	21	21	23	25	10	18	12	18	102	150	104	241	0.00246238	0.00222318	0.0042385	0.00286698	0.00294776	0.000725561	0.00122121	0.00104219	0.00128766	0.00106916	0.0291458	0.0277385	0.0297096	0.0357971	0.0305978
MIR-412;NA	6	8	4	1	264	276	242	292	4931	8069	5088	9484	0.000703538	0.000846924	0.000737131	0.000114679	0.000600568	0.0191548	0.0187252	0.0210176	0.0208888	0.0199466	1.409	1.49214	1.45349	1.40871	1.44084
MIR-607;NA	703	880	389	718	6341	6817	5586	6752	2436	3465	2495	4726	0.0824312	0.0931616	0.071686	0.0823397	0.0824046	0.460078	0.4625	0.485142	0.483017	0.472684	0.696071	0.640758	0.712745	0.701981	0.687889
MIR-500-3P;NA	2	8	2	5	63	79	64	77	1873	3364	2461	4734	0.000234513	0.000846924	0.000368565	0.000573396	0.000505849	0.00457104	0.00535976	0.00555837	0.00550834	0.00524938	0.535197	0.622081	0.703032	0.703169	0.64087
MIR-224;hsa-miR-224-5p|1x|1.5x	31837	39291	21811	34481	1549	1503	1307	1448	4796	8608	6573	12903	3.73309	4.15956	4.01939	3.95425	3.96657	0.112389	0.101971	0.113512	0.103585	0.107865	1.37042	1.59182	1.8777	1.91656	1.68913
MIR-676-star;NA	99692	118104	65059	104554	33084	35403	28174	33693	4090	6399	5256	11467	11.6895	12.5031	11.9892	11.9902	12.043	2.40045	2.40192	2.4469	2.41029	2.41489	1.16869	1.18332	1.50148	1.70326	1.38919
MIR-466H;NA	829	1088	561	869	415	518	365	432	5329	7266	4839	9342	0.0972055	0.115182	0.103383	0.0996562	0.103856	0.0301108	0.0351437	0.0317001	0.0309039	0.0319646	1.52273	1.34365	1.38235	1.38762	1.40909
MIR-17-star;NA	11	25	4	17	1660	1827	1301	1621	11698	19765	11060	19332	0.00128982	0.00264664	0.000737131	0.00194955	0.00165578	0.120443	0.123953	0.112991	0.115961	0.118337	3.34263	3.655	3.1595	2.8715	3.25716
MIR-766;hsa-miR-766-3p|1x|2x	23	32	12	32	598	558	454	565	2465	4711	3724	7427	0.00269689	0.0033877	0.00221139	0.00366973	0.00299143	0.0433886	0.0378575	0.0394297	0.0404183	0.0402735	0.704357	0.871172	1.06383	1.10318	0.935635
MIR-375;NA	11334	15461	7911	10852	83512	89418	52643	71039	4942	6610	3975	7386	1.32898	1.63679	1.45786	1.2445	1.41703	6.05931	6.06657	4.57202	5.08191	5.44495	1.41214	1.22234	1.13554	1.09709	1.21678
MIR-652;NA	46	95	16	45	390	403	261	366	4292	6563	5178	10067	0.00539379	0.0100572	0.00294852	0.00516056	0.00589002	0.0282969	0.0273416	0.0226677	0.0261825	0.0261222	1.22641	1.21365	1.4792	1.49531	1.35364
MIR-674-star;NA	28830	45016	20722	27777	3744	4155	3249	3945	510	812	726	912	3.3805	4.76564	3.81871	3.18544	3.78757	0.27165	0.281896	0.282174	0.282213	0.279483	0.145729	0.150158	0.207396	0.135465	0.159687
MIR-656;NA	177	404	128	196	1506	1597	1427	1604	1974	2504	1997	3411	0.0207544	0.0427697	0.0235882	0.0224771	0.0273973	0.10927	0.108349	0.123934	0.114745	0.114074	0.564057	0.463047	0.570482	0.506656	0.526061
MIR-875-5P;NA	3	1	2	1	116	123	84	108	1581	2391	1944	3226	0.000351769	0.000105865	0.000368565	0.000114679	0.00023522	0.00841651	0.00834494	0.00729536	0.00772598	0.0079457	0.45176	0.442151	0.555341	0.479177	0.482107
MIR-302C-hsa;hsa-miR-302c-3p|1x|3x	347	361	175	336	59	62	44	64	2977	4558	3199	6832	0.0406879	0.0382174	0.0322495	0.0385322	0.0374218	0.00428081	0.00420639	0.00382138	0.00457836	0.00422174	0.850658	0.842879	0.913856	1.0148	0.905548
MIR-497;NA	59	105	45	53	2606	2868	2198	2634	4945	7346	4828	9611	0.00691812	0.0111159	0.00829272	0.006078	0.00810118	0.189081	0.19458	0.190895	0.188428	0.190746	1.413	1.35844	1.37921	1.42758	1.39456
MIR-493;NA	77635	79586	46621	86980	32348	35311	27480	32364	5938	8076	4715	8726	9.10319	8.42541	8.59144	9.9748	9.02371	2.34705	2.39568	2.38663	2.31522	2.36114	1.69674	1.49344	1.34693	1.29612	1.45831
LET-7D-star;hsa-let-7d-3p|1x|8x	22873	33861	14883	15106	30791	30809	26089	31862	12953	18895	10409	22331	2.682	3.58471	2.74268	1.73234	2.68543	2.23408	2.09024	2.26582	2.27931	2.21736	3.70123	3.49412	2.97353	3.31695	3.37146
MIR-369-5P;hsa-miR-369-5p|1.5x|1x	2686	4318	1815	2395	2463	2655	2021	2391	4606	7772	5114	11191	0.31495	0.457127	0.334473	0.274657	0.345302	0.178706	0.180129	0.175523	0.171045	0.17635	1.31613	1.43722	1.46091	1.66226	1.46913
MIR-302B-star-hsa;NA	6	9	1	5	183	185	170	179	8357	12264	8165	17169	0.000703538	0.000952789	0.000184283	0.000573396	0.000603501	0.0132778	0.0125513	0.0147644	0.0128051	0.0133497	2.38796	2.2679	2.33249	2.55021	2.38464
MIR-126-5P;hsa-miR-126-5p|3x|1x	135	204	75	94	58392	63527	50416	59424	5366	8286	5243	8338	0.0158296	0.0215966	0.0138212	0.0107798	0.0155068	4.2367	4.30999	4.37861	4.25101	4.29408	1.5333	1.53227	1.49776	1.23849	1.45046
MIR-520G;NA	125	126	66	86	116	120	77	95	1638	2502	1692	3339	0.014657	0.0133391	0.0121627	0.00986241	0.0125053	0.00841651	0.00814141	0.00668742	0.006796	0.00751033	0.468048	0.462677	0.483353	0.495961	0.47751
MIR-101B;NA	1038	1317	662	1094	1440	1602	1373	1568	165	225	127	154	0.121712	0.139425	0.121995	0.125459	0.127148	0.104481	0.108688	0.119244	0.11217	0.111146	0.0471476	0.0416077	0.03628	0.0228745	0.0369775
MIR-675-5P;NA	42	83	17	41	169	172	108	151	5896	10560	5994	10311	0.00492476	0.00878684	0.00313281	0.00470185	0.00538656	0.012262	0.0116694	0.00937975	0.0108021	0.0110283	1.68474	1.95279	1.7123	1.53155	1.72035
MIR-483-5P;NA	18857	17193	9665	9721	1577	1617	1301	1528	6215	9125	5747	11722	2.2111	1.82015	1.78109	1.1148	1.73178	0.114421	0.109705	0.112991	0.109308	0.111607	1.77589	1.68742	1.64174	1.74114	1.71155
MIR-181C;NA	165	206	73	139	87896	93717	76955	88856	5599	8870	4938	9586	0.0193473	0.0218083	0.0134526	0.0159404	0.0176372	6.37739	6.35824	6.68351	6.35648	6.4439	1.59988	1.64027	1.41064	1.42386	1.51866
MIR-132;hsa-miR-132-3p|3x|1x	24	71	21	24	4693	5374	3774	4756	4926	6401	4452	8236	0.00281415	0.00751645	0.00386994	0.0027523	0.00423821	0.340506	0.364599	0.32777	0.340229	0.343276	1.40757	1.18369	1.2718	1.22334	1.2716
MIR-331-5P;NA	146	260	128	192	4553	5102	3663	4843	8918	14188	8169	14531	0.0171194	0.027525	0.0235882	0.0220184	0.0225628	0.330348	0.346146	0.31813	0.346453	0.335269	2.54826	2.62369	2.33363	2.15837	2.41599
MIR-20B-star;NA	1049	1539	705	1056	13566	14552	10748	13119	8885	15032	9904	20208	0.123002	0.162927	0.129919	0.121101	0.134237	0.984296	0.987281	0.933459	0.938492	0.960882	2.53883	2.77976	2.82927	3.00161	2.78737
MIR-301A;hsa-miR-301a-3p|10x|1x	3	4	5	1	10196	11302	8707	10536	1348	1995	1588	3004	0.000351769	0.000423462	0.000921414	0.000114679	0.000452831	0.739782	0.766785	0.756199	0.753712	0.75412	0.385182	0.368921	0.453643	0.446202	0.413487
MIR-222;hsa-mir-222|1.5x|1x	44	83	29	51	14	19	16	12	1596	2699	1875	3354	0.00515928	0.00878684	0.0053442	0.00584864	0.00628474	0.00101579	0.00128906	0.00138959	0.000858442	0.00113822	0.456046	0.499107	0.53563	0.498189	0.497243
MIR-516B;NA	127125	135177	78176	137192	14655	14913	13048	14972	2061	2828	1992	3821	14.9062	14.3106	14.4065	15.7331	14.8391	1.06331	1.01177	1.13321	1.07105	1.06984	0.588917	0.522962	0.569053	0.567556	0.562122
MIR-539;NA	173	268	122	141	326	396	233	309	4570	6953	4408	8503	0.0202853	0.028372	0.0224825	0.0161698	0.0218274	0.0236533	0.0268666	0.0202359	0.0221049	0.0232152	1.30585	1.28577	1.25923	1.263	1.27846
MIR-372;NA	21993	32537	15891	19760	8379	8221	6613	8028	5446	8738	5504	10916	2.57882	3.44455	2.92844	2.26606	2.80447	0.607948	0.557754	0.574336	0.574298	0.578584	1.55616	1.61586	1.57232	1.62142	1.59144
MIR-770-5P;NA	393	670	225	375	5150	5842	3853	5019	1630	3000	2209	4437	0.0460817	0.0709299	0.0414636	0.0430047	0.05037	0.373664	0.396351	0.334631	0.359043	0.365922	0.465762	0.554769	0.631044	0.659054	0.577657
MIR-876-5P-rno;NA	14	27	11	21	11	12	7	13	3254	5757	4452	8235	0.00164159	0.00285837	0.00202711	0.00240826	0.00223383	0.000798117	0.000814141	0.000607947	0.000929979	0.000787546	0.929809	1.0646	1.2718	1.22319	1.12235
MIR-145;hsa-miR-145-5p|1x|3x	8	6	2	2	76	94	63	92	513	922	942	1946	0.00093805	0.000635193	0.000368565	0.000229358	0.000542792	0.00551427	0.00637744	0.00547152	0.00658139	0.00598615	0.146586	0.170499	0.269101	0.289051	0.218809
MIR-103;hsa-miR-103a-3p|1x|3x	149	260	116	220	2076	2243	1794	2005	989	1372	1156	2380	0.0174712	0.027525	0.0213768	0.0252294	0.0229006	0.150627	0.152176	0.155808	0.143431	0.150511	0.2826	0.253714	0.330234	0.353515	0.305016
MIR-653;NA	381	518	225	310	733	866	583	661	1623	2522	1792	3325	0.0446746	0.0548383	0.0414636	0.0355506	0.0441318	0.0531836	0.0587538	0.0506333	0.0472859	0.0524642	0.463761	0.466376	0.51192	0.493882	0.483985
MIR-875-3P-hsa;NA	3415	5719	2262	2644	14035	14741	11105	13780	2966	3946	3139	6276	0.40043	0.605445	0.416848	0.303212	0.431484	1.01833	1.0001	0.964464	0.985778	0.992168	0.847515	0.729706	0.896716	0.932211	0.851537
MIR-29A;hsa-miR-29a-3p|1x|1.5x	18	48	19	28	1041	1047	869	1059	5245	8582	6857	13436	0.00211061	0.00508154	0.00350137	0.00321102	0.00347614	0.0755309	0.0710338	0.0754723	0.0757575	0.0744486	1.49872	1.58701	1.95884	1.99573	1.76007
MIR-657;NA	10	13	7	4	5	14	6	6	327	413	325	766	0.00117256	0.00137625	0.00128998	0.000458717	0.00107438	0.000362781	0.000949831	0.000521097	0.000429221	0.000565733	0.0934381	0.0763732	0.0928426	0.113778	0.0941081
MIR-498;NA	8	17	6	17	9	10	5	9	4279	6315	3751	8100	0.00093805	0.00179971	0.0011057	0.00194955	0.00144825	0.000653005	0.000678451	0.000434248	0.000643832	0.000602384	1.2227	1.16779	1.07155	1.20314	1.16629
MIR-494;NA	13	15	7	14	109	176	99	134	1202	2388	2064	3816	0.00152433	0.00158798	0.00128998	0.00160551	0.00150195	0.00790862	0.0119407	0.00859811	0.00958594	0.00950835	0.343463	0.441596	0.589622	0.566813	0.485374
MIR-876-3P-rno;NA	198	421	160	195	19	28	9	19	4003	6549	3680	6938	0.0232167	0.0445694	0.0294852	0.0223624	0.0299084	0.00137857	0.00189966	0.000781646	0.0013592	0.00135477	1.14383	1.21106	1.05126	1.03054	1.10917
MIR-137;NA	7	16	4	11	28	36	26	28	1738	2676	2051	3712	0.000820794	0.00169385	0.000737131	0.00126147	0.00112831	0.00203157	0.00244242	0.00225809	0.00200303	0.00218378	0.496622	0.494854	0.585908	0.551365	0.532187
MIR-666-5P;NA	8137	9890	5335	9536	316354	335966	260642	319993	1048	1980	1657	2816	0.954114	1.04701	0.983148	1.09358	1.01946	22.9534	22.7936	22.6366	22.8913	22.8187	0.299459	0.366148	0.473354	0.418277	0.389309
MIR-582-3P;NA	287	429	188	332	11744	12290	9685	11682	5067	8088	4490	7227	0.0336526	0.0454163	0.0346452	0.0380735	0.0379469	0.852099	0.833816	0.841138	0.835693	0.840687	1.44786	1.49566	1.28266	1.07347	1.32491
MIR-195;hsa-miR-195-5p|2x|1x	224	379	161	211	2167	2215	1728	2058	1489	2211	1554	2919	0.0262654	0.040123	0.0296695	0.0241973	0.0300638	0.157229	0.150277	0.150076	0.147223	0.151201	0.425472	0.408865	0.44393	0.433576	0.427961
MIR-520H;NA	39	57	15	36	2	2	3	1	5413	8963	5957	11919	0.004573	0.00603433	0.00276424	0.00412845	0.004375	0.000145112	0.00013569	0.000260549	7.15368e-05	0.000153222	1.54673	1.65747	1.70173	1.7704	1.66908
MIR-410;NA	193	327	134	180	38059	41476	34123	39317	3921	5872	4229	8033	0.0226305	0.034618	0.0246939	0.0206423	0.0256462	2.76141	2.81394	2.96357	2.81261	2.83788	1.1204	1.08587	1.2081	1.19319	1.15189
EBV-6-3P;NA	3772	5422	2787	3846	53731	57278	45053	55008	7166	10784	5380	10268	0.442291	0.574003	0.513596	0.441056	0.492736	3.89851	3.88603	3.91283	3.9351	3.90812	2.04764	1.99421	1.5369	1.52517	1.77598
MIR-500-5P;hsa-miR-500a-5p|1x|2x	5	9	2	6	432	497	376	427	2927	5178	3701	6975	0.000586281	0.000952789	0.000368565	0.000688075	0.000648928	0.0313442	0.033719	0.0326554	0.0305462	0.0320662	0.836371	0.957532	1.05726	1.03604	0.971801
MIR-449A;hsa-miR-449a|4x|1x	118	217	65	125	5028	5837	4302	5131	8773	13451	7919	14595	0.0138362	0.0229728	0.0119784	0.0143349	0.0157806	0.364812	0.396012	0.373627	0.367056	0.375377	2.50683	2.4874	2.26222	2.16788	2.35608
MIR-742-rno;NA	0	0	0	0	27	34	24	33	864	1503	1127	2104	0	0	0	0	0	0.00195902	0.00230673	0.00208439	0.00236072	0.00217771	0.246882	0.277939	0.321949	0.312519	0.289823
KSHV-K12-6-5P;NA	25	35	19	25	2741	3083	2213	2634	1188	2182	1341	2471	0.00293141	0.00370529	0.00350137	0.00286698	0.00325126	0.198876	0.209166	0.192198	0.188428	0.197167	0.339463	0.403502	0.383083	0.367032	0.37327
MIR-377;NA	10	19	12	15	77	81	65	90	3934	6263	3968	7215	0.00117256	0.00201144	0.00221139	0.00172019	0.0017789	0.00558682	0.00549545	0.00564522	0.00643832	0.00579145	1.12411	1.15817	1.13354	1.07169	1.12188
MIR-196B;hsa-miR-196b-5p|10x|1x	4360	5195	2579	4713	13296	14772	10627	13054	8955	12597	7843	15717	0.511237	0.549971	0.475265	0.540483	0.519239	0.964706	1.00221	0.92295	0.933842	0.955926	2.55883	2.32948	2.24051	2.33454	2.36584
MIR-548D-3P;NA	1	0	0	0	0	4	0	1	8	22	17	23	0.000117256	0	0	0	2.93141e-05	0	0.00027138	0	7.15368e-05	8.57293e-05	0.00228595	0.00406831	0.00485638	0.00341633	0.00365674
MIR-365;hsa-miR-365a-3p|1x|5x	1	4	1	1	225	237	200	245	1223	2093	1647	3211	0.000117256	0.000423462	0.000184283	0.000114679	0.00020992	0.0163251	0.0160793	0.0173699	0.0175265	0.0168252	0.349464	0.387044	0.470498	0.476949	0.420989
MIR-650;NA	2711	3644	1874	2832	6760	7020	5552	6706	5772	9517	5349	10580	0.317882	0.385774	0.345346	0.324771	0.343443	0.490479	0.476272	0.482189	0.479726	0.482167	1.64931	1.75991	1.52805	1.57151	1.62719
MIR-658;NA	0	1	0	2	5	4	5	12	33	48	25	68	0	0.000105865	0	0.000229358	8.3806e-05	0.000362781	0.00027138	0.000434248	0.000858442	0.000481713	0.00942953	0.00887631	0.00714174	0.0101004	0.008887
EBV-1-3P;NA	9	4	2	8	0	0	0	0	0	0	1	0	0.00105531	0.000423462	0.000368565	0.000917434	0.000691192	0	0	0	0	0	0	0	0.000285669	0	7.14174e-05
MIR-489-hsa;NA	51	55	14	28	11727	11890	9517	11704	2113	3349	2341	5288	0.00598007	0.0058226	0.00257996	0.00321102	0.00439841	0.850866	0.806678	0.826547	0.837267	0.83034	0.603776	0.619307	0.668752	0.785458	0.669323
MIR-466ABCE-3P;NA	15	21	15	17	391	353	378	376	664	1003	814	1473	0.00175884	0.00222318	0.00276424	0.00194955	0.00217395	0.0283694	0.0239493	0.0328291	0.0268979	0.0280114	0.189734	0.185478	0.232535	0.218793	0.206635
MIR-15B;hsa-miR-15b-5p|1x|8x	5	6	2	9	602	655	532	600	2071	2814	2253	4441	0.000586281	0.000635193	0.000368565	0.00103211	0.000655538	0.0436788	0.0444385	0.046204	0.0429221	0.0443108	0.591774	0.520373	0.643613	0.659648	0.603852
MIR-22;hsa-miR-22-3p|8x|1x	308	561	211	349	52125	56038	42979	51876	3526	6619	4414	9201	0.0361149	0.0593905	0.0388837	0.040023	0.043603	3.78199	3.8019	3.73271	3.71105	3.75691	1.00753	1.22401	1.26094	1.36668	1.21479
MIR-138;NA	1	5	4	1	1993	2064	1504	1833	1033	1659	1232	2288	0.000117256	0.000529327	0.000737131	0.000114679	0.000374598	0.144604	0.140032	0.130622	0.131127	0.136596	0.295173	0.306787	0.351945	0.33985	0.323439
MIR-327-mmu;NA	2998	3549	2139	3061	4054	4155	3437	4042	2064	3818	2283	4241	0.351534	0.375717	0.394181	0.351033	0.368116	0.294143	0.281896	0.298502	0.289152	0.290923	0.589774	0.706036	0.652183	0.629941	0.644484
MIR-19B;hsa-miR-19b-3p|1x|10x	6	2	0	2	133	157	108	170	4925	7535	4975	9810	0.000703538	0.000211731	0	0.000229358	0.000286157	0.00964996	0.0106517	0.00937975	0.0121613	0.0104607	1.40729	1.3934	1.42121	1.45714	1.41976
MIR-32;hsa-miR-32-5p|1x|2x	322	568	235	392	6	8	8	11	3743	5900	3452	6790	0.0377565	0.0601316	0.0433064	0.0449542	0.0465372	0.000435337	0.000542761	0.000694797	0.000786905	0.00061495	1.06954	1.09105	0.986131	1.00856	1.03882
MIR-520E;NA	118	110	41	51	234	219	166	195	7439	11480	7093	15031	0.0138362	0.0116452	0.00755559	0.00584864	0.00972142	0.0169781	0.0148581	0.014417	0.0139497	0.0150507	2.12564	2.12292	2.02625	2.23264	2.12686
MIR-361-5P;NA	63	123	47	77	2583	2586	2194	2637	3411	5748	3674	7601	0.00738715	0.0130215	0.00866129	0.0088303	0.00947505	0.187412	0.175447	0.190548	0.188643	0.185513	0.97467	1.06294	1.04955	1.12902	1.05404
MIR-518D-3P;NA	14	14	1	6	152	183	119	169	2670	4334	3266	6882	0.00164159	0.00148212	0.000184283	0.000688075	0.000999016	0.0110285	0.0124156	0.0103351	0.0120897	0.0114673	0.762935	0.801456	0.932996	1.02222	0.879903
MIR-30D;hsa-miR-30d-5p|4x|1x	9480	13196	6033	8447	5679	6502	4413	5453	5842	8743	5544	10695	1.11159	1.397	1.11178	0.968695	1.14727	0.412046	0.441129	0.383267	0.39009	0.406633	1.66931	1.61678	1.58375	1.58859	1.61461
MIR-409-3P;hsa-miR-409-3p|5x|1x	180891	185217	115415	117253	70196	73506	58551	70589	4825	7475	5019	9692	21.2106	19.6081	21.269	13.4465	18.8835	5.09315	4.98702	5.08513	5.04971	5.05375	1.37871	1.3823	1.43377	1.43961	1.4086
MIR-465-3P;NA	55	73	31	41	17	11	17	17	4671	6652	5061	10032	0.0064491	0.00772818	0.00571276	0.00470185	0.00614797	0.00123345	0.000746296	0.00147644	0.00121613	0.00116808	1.33471	1.23011	1.44577	1.49011	1.37517
MIR-330-3P-hsa;hsa-miR-330-3p|1x|1.5x	560	1196	436	590	435	517	313	410	1247	1953	1353	2807	0.0656635	0.126615	0.0803473	0.0676607	0.0850717	0.0315619	0.0350759	0.0271839	0.0293301	0.030788	0.356322	0.361155	0.386511	0.41694	0.380232
MIR-760-3P;NA	26214	27732	18089	27049	5162	5850	4283	5195	2635	4178	1838	4071	3.07376	2.93586	3.33349	3.10196	3.11127	0.374535	0.396894	0.371977	0.371634	0.37876	0.752934	0.772608	0.52506	0.60469	0.663823
MIR-188-5P;hsa-miR-188-5p|1x|10x	456	701	258	466	91	112	64	97	5814	9721	5585	10910	0.0534689	0.0742117	0.0475449	0.0534405	0.0571665	0.00660261	0.00759865	0.00555837	0.00693907	0.00667468	1.66131	1.79764	1.59546	1.62053	1.66873
MIR-378;NA	2738	3608	1924	2752	29139	31275	23776	28334	6561	10736	6433	12290	0.321048	0.381963	0.35456	0.315597	0.343292	2.11421	2.12185	2.06494	2.02693	2.08198	1.87476	1.98533	1.83771	1.82551	1.88083
MIR-509-3P;NA	13245	13978	7657	13807	80204	83917	71267	81555	14669	21209	11569	22687	1.55306	1.47979	1.41105	1.58338	1.50682	5.81929	5.69335	6.18951	5.83419	5.88409	4.19157	3.92203	3.30491	3.36983	3.69709
MIR-463-mmu;NA	62	109	35	29	128	125	98	133	5033	8312	5195	10026	0.00726989	0.0115393	0.0064499	0.0033257	0.0071462	0.00928718	0.00848063	0.00851126	0.0095144	0.00894837	1.43815	1.53708	1.48405	1.48922	1.48712
HSV1-LAT;NA	15	17	7	18	117	120	68	118	287	552	477	993	0.00175884	0.00179971	0.00128998	0.00206423	0.00172819	0.00848907	0.00814141	0.00590577	0.00844135	0.0077444	0.0820083	0.102078	0.136264	0.147496	0.116962
MIR-655;NA	10	17	3	6	6	8	8	11	4050	5392	3994	7777	0.00117256	0.00179971	0.000552848	0.000688075	0.0010533	0.000435337	0.000542761	0.000694797	0.000786905	0.00061495	1.15726	0.997105	1.14096	1.15516	1.11262
MIR-659;NA	264	349	164	209	368	434	312	407	2184	3298	2432	4900	0.0309557	0.0369471	0.0302224	0.023968	0.0305233	0.0267007	0.0294448	0.0270971	0.0291155	0.0280895	0.624063	0.609876	0.694748	0.727826	0.664128
MIR-487A;NA	36	45	14	17	2501	2796	1998	2370	3295	4387	3265	6282	0.00422123	0.00476395	0.00257996	0.00194955	0.00337867	0.181463	0.189695	0.173525	0.169542	0.178556	0.941524	0.811257	0.932711	0.933102	0.904649
MIR-453-mmu;NA	11	17	7	5	53	56	49	71	2928	4886	3171	6256	0.00128982	0.00179971	0.00128998	0.000573396	0.00123823	0.00384547	0.00379932	0.00425563	0.00507912	0.00424489	0.836656	0.903534	0.905858	0.92924	0.893822
RLCV-4-5P;NA	34	46	18	27	13232	14238	11330	13512	6489	10386	6596	10934	0.00398671	0.00486981	0.00331709	0.00309634	0.00381749	0.960063	0.965978	0.984006	0.966606	0.969163	1.85419	1.92061	1.88428	1.62409	1.82079
MIR-350-hsa;NA	2	6	2	5	23	17	18	26	514	670	676	1222	0.000234513	0.000635193	0.000368565	0.000573396	0.000452917	0.00166879	0.00115337	0.00156329	0.00185996	0.00156135	0.146872	0.123898	0.193113	0.181511	0.161348
MIR-742-star;NA	0	8	0	0	310	313	273	267	2547	3788	2823	5779	0	0.000846924	0	0	0.000211731	0.0224924	0.0212355	0.0237099	0.0191003	0.0216345	0.727788	0.700488	0.806445	0.858389	0.773278
MIR-451;hsa-miR-451a|1x|10x	3	4	0	1	250	229	213	199	889	1707	1474	3105	0.000351769	0.000423462	0	0.000114679	0.000222478	0.018139	0.0155365	0.018499	0.0142358	0.0166026	0.254026	0.315664	0.421077	0.461204	0.362993
MIR-105-mmu;NA	1	1	0	0	124	158	109	118	4049	7030	4785	8884	0.000117256	0.000105865	0	0	5.57804e-05	0.00899696	0.0107195	0.0094666	0.00844135	0.00940611	1.15697	1.30001	1.36693	1.31959	1.28588
MIR-190B;NA	39	84	34	60	2610	2596	2342	2573	7580	12253	7133	11959	0.004573	0.0088927	0.00626561	0.00688075	0.00665302	0.189371	0.176126	0.203402	0.184064	0.188241	2.16593	2.26586	2.03768	1.77634	2.06145
MIR-344-5P;NA	403	456	229	483	3034	3234	2328	2666	763	1251	1013	2369	0.0472543	0.0482747	0.0422007	0.0553901	0.0482799	0.220135	0.219411	0.202186	0.190717	0.208112	0.218022	0.231339	0.289383	0.351881	0.272656
MIR-376B-star;NA	1269	1744	860	1380	8573	9874	7256	7878	16175	24824	13545	25130	0.148798	0.184629	0.158483	0.158257	0.162542	0.622024	0.669902	0.63018	0.563567	0.621418	4.6219	4.59053	3.86939	3.73271	4.20363
MIR-379;NA	43319	48529	26975	35512	43	56	42	62	4924	7954	4595	8703	5.07943	5.13755	4.97103	4.07249	4.81512	0.00311991	0.00379932	0.00364768	0.00443528	0.00375055	1.407	1.47088	1.31265	1.29271	1.37081
MIR-620;NA	7781	12133	5543	7177	66862	70706	58950	70269	4430	6634	3909	7540	0.912371	1.28447	1.02148	0.823053	1.01034	4.85125	4.79705	5.11978	5.02682	4.94873	1.26584	1.22678	1.11668	1.11996	1.18232
MIR-376A-star;NA	246	373	149	250	2153	2234	1825	2086	2865	3850	2996	5528	0.028845	0.0394878	0.0274581	0.0286698	0.0311152	0.156213	0.151566	0.1585	0.149226	0.153876	0.818655	0.711954	0.855866	0.821106	0.801895
EBV-19-5P;NA	87	113	54	106	109884	124155	89746	108506	3683	6387	4603	9543	0.0102013	0.0119628	0.00995127	0.012156	0.0110678	7.97276	8.4233	7.7944	7.76218	7.98816	1.05239	1.1811	1.31494	1.41748	1.24148
MIR-491-5P;NA	36	53	23	50	38	45	22	39	7916	11939	7050	14692	0.00422123	0.00561087	0.0042385	0.00573396	0.00495114	0.00275713	0.00305303	0.00191069	0.00278994	0.0026277	2.26194	2.2078	2.01397	2.18229	2.1665
MIR-487B;NA	107	187	109	130	3634	3914	2874	3465	3234	3900	2912	5616	0.0125464	0.0197968	0.0200868	0.0149083	0.0168346	0.263669	0.265546	0.249606	0.247875	0.256674	0.924094	0.7212	0.831869	0.834177	0.827835
MIR-483-5P-hsa;hsa-miR-483-5p|1x|2x	17974	16914	9392	9701	1183	1224	1067	1112	5538	8493	5220	10564	2.10756	1.79061	1.73078	1.1125	1.68536	0.0858339	0.0830424	0.0926685	0.079549	0.0852734	1.58245	1.57055	1.49119	1.56913	1.55333
MIR-881-rno;NA	198161	213054	129953	221770	141365	149633	121391	149297	1110	1636	1577	2838	23.2356	22.5551	23.9481	25.4324	23.7928	10.2569	10.1519	10.5428	10.6802	10.4079	0.317175	0.302534	0.450501	0.421545	0.372939
MIR-576-3P;hsa-miR-576-3p|1x|5x	22498	34038	15292	20437	7183	8195	5626	6788	4303	5597	3456	6819	2.63803	3.60345	2.81805	2.3437	2.85081	0.521171	0.55599	0.488616	0.485592	0.512842	1.22955	1.03501	0.987273	1.01287	1.06618
MIR-583;NA	6	19	8	13	693	683	591	695	4326	5762	3668	6971	0.000703538	0.00201144	0.00147426	0.00149083	0.00142002	0.0502814	0.0463382	0.0513281	0.0497181	0.0494164	1.23613	1.06553	1.04784	1.03544	1.09623
MIR-217-hsa;NA	968	1495	650	1024	163	175	144	147	2136	2679	2071	4022	0.113504	0.158269	0.119784	0.117432	0.127247	0.0118266	0.0118729	0.0125063	0.0105159	0.0116804	0.610348	0.495409	0.591621	0.597411	0.573697
MIR-871-rno;NA	1680	2799	1166	1876	5660	6139	4538	6065	3017	3741	2747	5180	0.196991	0.296317	0.214874	0.215138	0.23083	0.410668	0.416501	0.394123	0.433871	0.413791	0.862088	0.691797	0.784734	0.769416	0.777009
MIR-15A;hsa-miR-15a-5p|4x|1x	1	1	2	4	147	188	105	143	3091	4920	3447	6475	0.000117256	0.000105865	0.000368565	0.000458717	0.000262601	0.0106658	0.0127549	0.0091192	0.0102298	0.0106924	0.883233	0.909821	0.984702	0.96177	0.934882
MIR-624-star;NA	11	31	6	8	162	177	132	142	5981	9729	6847	13438	0.00128982	0.00328183	0.0011057	0.000917434	0.00164869	0.0117541	0.0120086	0.0114641	0.0101582	0.0113463	1.70903	1.79912	1.95598	1.99603	1.86504
MIR-31;NA	26	44	15	22	7722	8097	6108	7441	6310	9869	6354	12700	0.00304866	0.00465808	0.00276424	0.00252294	0.00324848	0.560278	0.549341	0.530477	0.532306	0.543101	1.80304	1.82501	1.81514	1.88641	1.8324
MIR-302B-star-mmu;NA	30	29	16	20	35	41	28	31	8722	12116	8215	16896	0.00351769	0.0030701	0.00294852	0.00229358	0.00295747	0.00253946	0.00278165	0.00243179	0.00221764	0.00249264	2.49225	2.24053	2.34677	2.50966	2.3973
MIR-503;NA	11	8	2	3	9	7	6	5	1867	3387	2249	4081	0.00128982	0.000846924	0.000368565	0.000344038	0.000712337	0.000653005	0.000474915	0.000521097	0.000357684	0.000501676	0.533483	0.626334	0.64247	0.606175	0.602116
MIR-1-star;NA	0	0	0	0	7	7	6	9	253	471	451	964	0	0	0	0	0	0.000507893	0.000474915	0.000521097	0.000643832	0.000536934	0.0722931	0.0870988	0.128837	0.143189	0.107854
LET-7A;hsa-let-7a-5p|1x|1x	1649	2186	1156	1649	1633	2662	2333	2632	3318	4457	2587	4669	0.193356	0.231422	0.213031	0.189106	0.206729	0.118484	0.180604	0.20262	0.188285	0.172498	0.948096	0.824202	0.739027	0.693514	0.80121
MIR-708-star;NA	936	1126	523	874	13928	15004	11821	14115	2581	4554	3042	5863	0.109752	0.119205	0.0963799	0.10023	0.106391	1.01056	1.01795	1.02665	1.00974	1.01623	0.737503	0.84214	0.869006	0.870866	0.829879
MIR-590-5P-rno;NA	2	0	0	1	46	44	30	49	990	1673	1102	1828	0.000234513	0	0	0.000114679	8.72979e-05	0.00333758	0.00298518	0.00260549	0.00350531	0.00310839	0.282886	0.309376	0.314808	0.271524	0.294648
MIR-151-3P;NA	67267	56377	38660	79508	65458	68890	50733	64813	1461	2444	1298	2314	7.88748	5.96838	7.12437	9.11791	7.52454	4.74938	4.67385	4.40614	4.63652	4.61647	0.417471	0.451952	0.370799	0.343712	0.395983
MIR-465A-5P;NA	12	34	21	23	61	71	49	81	12	24	24	26	0.00140708	0.00359943	0.00386994	0.00263762	0.00287852	0.00442592	0.004817	0.00425563	0.00579448	0.00482326	0.00342892	0.00443815	0.00685607	0.00386193	0.00464627
MIR-208B;NA	36	67	21	35	6475	7212	5915	6860	5843	8933	5463	9771	0.00422123	0.00709299	0.00386994	0.00401377	0.00479948	0.469801	0.489299	0.513715	0.490743	0.490889	1.6696	1.65192	1.56061	1.45134	1.58337
MIR-99A;hsa-miR-99a-5p|3x|1x	4193	6346	2851	3857	3314	3335	2572	3240	1671	2814	2400	4692	0.491656	0.671822	0.52539	0.442318	0.532796	0.240451	0.226263	0.223377	0.231779	0.230468	0.477477	0.520373	0.685607	0.69693	0.595097
MIR-302A;hsa-miR-302a-3p|10x|1x	99	140	63	95	24	26	16	17	3604	5385	3516	6709	0.0116084	0.0148212	0.0116098	0.0108945	0.0122335	0.00174135	0.00176397	0.00138959	0.00121613	0.00152776	1.02982	0.995811	1.00441	0.996527	1.00664
MIR-621;NA	0	0	0	0	8	6	11	9	554	1027	892	1601	0	0	0	0	0	0.000580449	0.00040707	0.000955345	0.000643832	0.000646674	0.158302	0.189916	0.254817	0.237806	0.21021
MIR-24;hsa-miR-24-3p|1x|1.5x	1286	1524	785	1121	5	12	14	16	7723	12071	6879	14333	0.150792	0.161339	0.144662	0.128555	0.146337	0.000362781	0.000814141	0.00121589	0.00114459	0.000884351	2.2068	2.23221	1.96512	2.12896	2.13327
MIR-590-3P;NA	35	33	22	34	566	632	456	629	5788	8667	5113	8840	0.00410397	0.00349356	0.00405422	0.00389909	0.00388771	0.0410668	0.0428781	0.0396034	0.0449967	0.0421362	1.65388	1.60273	1.46063	1.31306	1.50757
MIR-741-3P-rno;NA	10869	14898	7574	9924	7348	8830	6219	7626	1765	2660	2063	4427	1.27446	1.57718	1.39576	1.13808	1.34637	0.533142	0.599072	0.540117	0.54554	0.554468	0.504337	0.491895	0.589336	0.657568	0.560784
EBV-2-5P;NA	4	11	7	1	0	0	0	0	1	0	0	2	0.000469025	0.00116452	0.00128998	0.000114679	0.000759551	0	0	0	0	0	0.000285743	0	0	0.000297072	0.000145704
MIR-200A;hsa-miR-200a-3p|1x|10x	535	898	434	594	832	931	778	859	4901	7215	4865	9211	0.0627321	0.0950672	0.0799787	0.0681194	0.0764744	0.0603667	0.0631638	0.067569	0.0614502	0.0631374	1.40043	1.33422	1.38978	1.36816	1.37315
MIR-302C;NA	330	294	170	336	6	0	2	4	4609	7859	5131	11066	0.0386946	0.0311245	0.0313281	0.0385322	0.0349198	0.000435337	0	0.000173699	0.000286147	0.000223796	1.31699	1.45331	1.46577	1.6437	1.46994
MIR-466C-5P-mmu;NA	165	176	72	165	501	523	434	463	3325	4722	3797	6974	0.0193473	0.0186323	0.0132684	0.0189221	0.0175425	0.0363506	0.035483	0.0376927	0.0331216	0.035662	0.950097	0.873207	1.08469	1.03589	0.98597
MIR-590-3P-rno;NA	9731	12844	6564	8959	522	558	402	490	4111	6121	3505	6215	1.14102	1.35974	1.20963	1.02741	1.18445	0.0378743	0.0378575	0.0349135	0.0350531	0.0364246	1.17469	1.13191	1.00127	0.92315	1.05776
MIR-574-5P;NA	599	580	321	505	157	168	130	159	9244	13745	7307	14714	0.0702365	0.061402	0.0591548	0.057913	0.0621766	0.0113913	0.011398	0.0112904	0.0113744	0.0113635	2.64141	2.54177	2.08739	2.18556	2.36403
MIR-202-3P-rno;NA	212	350	118	175	130	162	119	155	5550	8503	5449	12287	0.0248583	0.0370529	0.0217454	0.0200689	0.0259314	0.0094323	0.0109909	0.0103351	0.0110882	0.0104616	1.58588	1.5724	1.55661	1.82506	1.63499
EBV-18-3P;NA	89	117	51	94	21343	23517	18413	21707	1190	1552	1194	1907	0.0104358	0.0123863	0.00939842	0.0107798	0.0107501	1.54857	1.59551	1.59916	1.55285	1.57402	0.340035	0.287001	0.341089	0.283258	0.312846
RLCV-14-3P;NA	4212	5380	2792	4667	39089	42569	32148	38989	11104	17620	10220	19312	0.493883	0.569556	0.514517	0.535208	0.528291	2.83615	2.8881	2.79204	2.78915	2.82636	3.17289	3.25834	2.91954	2.86852	3.05483
MIR-505-mmu;NA	3	3	3	5	83	131	62	104	1869	2689	1787	2912	0.000351769	0.000317596	0.000552848	0.000573396	0.000448902	0.00602216	0.0088877	0.00538467	0.00743983	0.00693359	0.534054	0.497258	0.510491	0.432536	0.493585
MIR-580;NA	855	1196	577	894	23119	24037	20207	23189	438	610	595	1001	0.100254	0.126615	0.106331	0.102523	0.108931	1.67743	1.63079	1.75497	1.65887	1.68051	0.125156	0.112803	0.169973	0.148684	0.139154
MIR-588;NA	839	1285	539	1035	23876	26536	19810	24522	2759	4904	3741	7194	0.098378	0.136037	0.0993284	0.118693	0.113109	1.73235	1.80034	1.72049	1.75423	1.75185	0.788366	0.906863	1.06869	1.06857	0.958121
MIR-584;hsa-miR-584-5p|1x|10x	8735	10580	5290	7170	9471	10084	7538	9108	1341	2091	1300	1853	1.02423	1.12006	0.974856	0.82225	0.985349	0.687179	0.68415	0.654672	0.651558	0.66939	0.383182	0.386674	0.37137	0.275237	0.354116
MIR-519E-star;NA	1	0	0	1	9	3	8	3	2877	5335	4176	7692	0.000117256	0	0	0.000114679	5.79839e-05	0.000653005	0.000203535	0.000694797	0.000214611	0.000441487	0.822084	0.986564	1.19296	1.14254	1.03604
MIR-434-3P;NA	840	1548	598	1027	64363	69416	53857	64262	1950	3138	2271	3974	0.0984953	0.16388	0.110201	0.117776	0.122588	4.66993	4.70953	4.67746	4.5971	4.66351	0.557199	0.580289	0.648755	0.590282	0.594131
MIR-542-5P-2;NA	3	5	1	1	344	402	283	380	3702	6127	4376	9037	0.000351769	0.000529327	0.000184283	0.000114679	0.000295015	0.0249593	0.0272737	0.0245784	0.027184	0.0259989	1.05782	1.13302	1.25009	1.34232	1.19581
MIR-660;hsa-miR-660-5p|8x|1x	20	18	15	19	3548	3644	2928	3424	2391	3723	2753	5481	0.00234513	0.00190558	0.00276424	0.0021789	0.00229846	0.257429	0.247227	0.254296	0.244942	0.250974	0.683212	0.688468	0.786448	0.814125	0.743063
MIR-882A;NA	3799	5085	2409	4188	62126	68406	55803	64560	1889	3069	2111	3941	0.445457	0.538326	0.443937	0.480276	0.476999	4.50762	4.64101	4.84647	4.61842	4.65338	0.539769	0.567529	0.603048	0.58538	0.573931
MIR-17;hsa-miR-17-5p|1x|1x	42	62	28	42	230	279	166	232	1925	2859	2000	3521	0.00492476	0.00656366	0.00515992	0.00481653	0.00536622	0.0166879	0.0189288	0.014417	0.0165965	0.0166576	0.550056	0.528695	0.571339	0.522995	0.543271
MIR-504;NA	11922	14917	8010	13764	2152	2200	1640	2035	2304	4204	3282	6658	1.39793	1.5792	1.4761	1.57844	1.50792	0.156141	0.149259	0.142433	0.145577	0.148353	0.658353	0.777416	0.937567	0.988952	0.840572
MIR-467B-star;NA	5	9	3	11	26	26	31	23	4583	7818	5155	9851	0.000586281	0.000952789	0.000552848	0.00126147	0.000838348	0.00188646	0.00176397	0.00269234	0.00164535	0.00199703	1.30956	1.44573	1.47263	1.46323	1.42279
MIR-106B;hsa-miR-106b-5p|1x|1x	4	12	3	5	349	299	273	280	494	737	524	744	0.000469025	0.00127039	0.000552848	0.000573396	0.000716414	0.0253221	0.0202857	0.0237099	0.0200303	0.022337	0.141157	0.136288	0.149691	0.110511	0.134412
MIR-349;NA	393	750	293	470	853	830	677	861	1550	3022	2373	4197	0.0460817	0.0793991	0.0539948	0.0538992	0.0583437	0.0618904	0.0563114	0.0587972	0.0615932	0.059648	0.442902	0.558837	0.677893	0.623405	0.57576
MIR-341;NA	4321	5408	2914	4628	49311	51826	39461	48389	14907	22982	12694	23944	0.506664	0.572521	0.537	0.530735	0.53673	3.57782	3.51614	3.42717	3.4616	3.49568	4.25958	4.2499	3.62629	3.55654	3.92308
MIR-182;NA	147	172	93	113	3643	3579	3078	3420	69	66	43	60	0.0172367	0.0182089	0.0171383	0.0129587	0.0163856	0.264322	0.242817	0.267323	0.244656	0.25478	0.0197163	0.0122049	0.0122838	0.00891215	0.0132793
MIR-467A-star;NA	8	9	10	4	18	18	13	14	1617	2884	1896	3837	0.00093805	0.000952789	0.00184283	0.000458717	0.0010481	0.00130601	0.00122121	0.00112904	0.00100152	0.00116445	0.462047	0.533318	0.541629	0.569932	0.526732
MIR-154-star;NA	26	32	5	13	35	34	19	31	5296	6794	4703	8873	0.00304866	0.0033877	0.000921414	0.00149083	0.00221215	0.00253946	0.00230673	0.00165014	0.00221764	0.0021785	1.5133	1.25637	1.3435	1.31796	1.35778
MIR-125A-5P;hsa-miR-125a-5p|1x|1x	343	587	220	312	10788	11518	7198	9476	375	590	538	1090	0.0402189	0.062143	0.0405422	0.0357799	0.044671	0.782736	0.781439	0.625143	0.677883	0.7168	0.107154	0.109105	0.15369	0.161904	0.132963
MIR-626;NA	251	402	184	248	2706	2926	2299	2854	3580	5307	3556	6368	0.0294313	0.0425579	0.033908	0.0284404	0.0335844	0.196337	0.198515	0.199667	0.204166	0.199671	1.02296	0.981387	1.01584	0.945876	0.991516
MIR-622;NA	46550	54218	31553	57553	45257	48561	38405	46178	9770	15054	7825	15192	5.45828	5.73981	5.81467	6.60013	5.90322	3.28367	3.29462	3.33546	3.30343	3.3043	2.79171	2.78383	2.23536	2.25656	2.51687
MIR-673-3P;NA	15976	17638	9734	17787	155075	169813	131515	163407	2220	3532	1945	3675	1.87329	1.86726	1.79381	2.0398	1.89354	11.2516	11.521	11.422	11.6896	11.4711	0.63435	0.653148	0.555627	0.545869	0.597249
MIR-302D;NA	82	173	71	93	250	282	188	217	5149	7478	5643	10747	0.00961502	0.0183147	0.0130841	0.0106652	0.0129197	0.018139	0.0191323	0.0163277	0.0155235	0.0172806	1.47129	1.38285	1.61203	1.59632	1.51562
EBV-13;NA	436	811	333	445	29	31	26	37	5640	8563	5018	10269	0.0511237	0.0858569	0.0613661	0.0510322	0.0623448	0.00210413	0.0021032	0.00225809	0.00264686	0.00227807	1.61159	1.5835	1.43349	1.52531	1.53847
MIR-519B-3P;NA	38	42	15	18	38	45	45	47	5429	8954	6166	12266	0.00445574	0.00444635	0.00276424	0.00206423	0.00343264	0.00275713	0.00305303	0.00390823	0.00336223	0.00327016	1.5513	1.6558	1.76144	1.82194	1.69762
MIR-581;NA	118114	142747	82562	126296	7497	8098	6786	7634	5846	7692	4892	8374	13.8496	15.112	15.2147	14.4835	14.665	0.543953	0.549409	0.589361	0.546112	0.557209	1.67046	1.42243	1.39749	1.24384	1.43355
MIR-585;NA	333	557	233	403	7385	8325	6229	7421	8331	13441	7190	11375	0.0390463	0.0589671	0.0429379	0.0462157	0.0467918	0.535827	0.56481	0.540986	0.530875	0.543125	2.38053	2.48555	2.05396	1.6896	2.15241
MIR-34B-5P;NA	4	0	0	1	441	458	389	479	1023	1722	1032	1790	0.000469025	0	0	0.000114679	0.000145926	0.0319973	0.031073	0.0337845	0.0342662	0.0327802	0.292315	0.318437	0.294811	0.265879	0.292861
MIR-220;NA	18	17	8	5	10953	11661	9057	10878	1445	2790	2157	4253	0.00211061	0.00179971	0.00147426	0.000573396	0.0014895	0.794707	0.791141	0.786597	0.778178	0.787656	0.412899	0.515935	0.616189	0.631723	0.544187
MIR-130B;hsa-miR-130b-3p|1x|3x	0	2	1	4	1333	1426	1180	1336	2682	4398	3112	5119	0	0.000211731	0.000184283	0.000458717	0.000213683	0.0967173	0.0967471	0.102482	0.0955732	0.09788	0.766364	0.813292	0.889003	0.760355	0.807253
MIR-493-mmu;NA	9821	12588	6188	9907	24086	25110	19932	23813	4509	6671	4204	8203	1.15157	1.33263	1.14034	1.13613	1.19017	1.74759	1.70359	1.73109	1.70351	1.72144	1.28842	1.23362	1.20095	1.21844	1.23536
MIR-882B;NA	1130	1695	728	1224	39649	42908	36237	41613	4263	6845	4002	7862	0.1325	0.179442	0.134158	0.140367	0.146617	2.87678	2.9111	3.14717	2.97686	2.97798	1.21812	1.2658	1.14325	1.16779	1.19874
MIR-224-mmu;NA	45899	56017	31131	49592	1403	1468	1210	1467	4639	8130	6530	13005	5.38195	5.93027	5.73691	5.68717	5.68407	0.101796	0.0995966	0.105088	0.104945	0.102856	1.32556	1.50342	1.86542	1.93171	1.65653
MIR-880-mmu;NA	1502	2331	1030	1661	295	334	280	295	1891	3007	2196	4203	0.176119	0.246772	0.189811	0.190482	0.200796	0.0214041	0.0226603	0.0243179	0.0211034	0.0223714	0.540341	0.556064	0.62733	0.624296	0.587008
MIR-505;NA	20	41	9	20	1865	2031	1595	1888	7153	9632	6479	12348	0.00234513	0.00434048	0.00165854	0.00229358	0.00265943	0.135317	0.137793	0.138525	0.135062	0.136674	2.04392	1.78118	1.85085	1.83412	1.87752
MIR-362-5P-hsa;hsa-miR-362-5p|4x|1x	295	491	170	198	302	279	269	280	1716	2869	2181	4260	0.0345906	0.05198	0.0313281	0.0227065	0.0351513	0.021912	0.0189288	0.0233625	0.0200303	0.0210584	0.490336	0.530544	0.623045	0.632763	0.569172
MIR-598-3P-hsa;NA	105	170	55	92	1071	1105	995	1086	1448	1739	1398	2414	0.0123119	0.0179971	0.0101355	0.0105505	0.0127488	0.0777076	0.0749688	0.0864153	0.077689	0.0791952	0.413756	0.321581	0.399366	0.358566	0.373317
MIR-187;NA	22	27	13	18	1567	1727	1185	1532	1470	2746	1766	2827	0.00257964	0.00285837	0.00239568	0.00206423	0.00247448	0.113695	0.117168	0.102917	0.109594	0.110844	0.420043	0.507799	0.504492	0.419911	0.463061
MIR-186;hsa-miR-186-5p|1.5x|1x	26	49	25	31	15907	16539	13217	15736	317	418	467	758	0.00304866	0.00518741	0.00460707	0.00355506	0.00409955	1.15415	1.12209	1.14789	1.1257	1.13746	0.0905806	0.0772978	0.133408	0.11259	0.103469
MIR-291B-5P-rno;NA	163	230	89	150	733	834	618	700	5101	7164	5045	9442	0.0191128	0.0243491	0.0164012	0.0172019	0.0192662	0.0531836	0.0565828	0.053673	0.0500758	0.0533788	1.45758	1.32479	1.4412	1.40248	1.40651
MIR-623;NA	76	177	76	101	9290	10209	7347	9265	12869	19074	10663	20920	0.00891148	0.0187382	0.0140055	0.0115826	0.0133094	0.674046	0.69263	0.638084	0.662789	0.666887	3.67723	3.52722	3.04609	3.10737	3.33948
MIR-627;NA	40	57	23	28	7331	7721	6010	7176	3740	5638	3678	7087	0.00469025	0.00603433	0.0042385	0.00321102	0.00454353	0.531909	0.523832	0.521966	0.513348	0.522764	1.06868	1.0426	1.05069	1.05267	1.05366
MIR-468;NA	15224	21084	9597	14140	2908	3256	2721	3147	6486	8682	5740	10166	1.78511	2.23207	1.76856	1.62156	1.85183	0.210993	0.220904	0.236318	0.225126	0.223335	1.85333	1.6055	1.63974	1.51002	1.65215
MIR-30C;hsa-miR-30c-5p|1x|1x	3099	4820	2129	3475	801	920	666	819	1944	2751	2229	4416	0.363377	0.510272	0.392338	0.39851	0.416124	0.0581175	0.0624175	0.0578418	0.0585887	0.0592414	0.555485	0.508723	0.636757	0.655934	0.589225
MIR-464;NA	4809	8160	3452	4888	1182	1199	1058	1175	1388	1603	1333	2471	0.563885	0.863862	0.636144	0.560552	0.656111	0.0857613	0.0813462	0.0918868	0.0840558	0.0857626	0.396612	0.296432	0.380797	0.367032	0.360218
MIR-513A-3P;NA	13	38	9	17	167	179	166	144	2277	3236	2465	4974	0.00152433	0.00402289	0.00165854	0.00194955	0.00228883	0.0121169	0.0121443	0.014417	0.0103013	0.0122449	0.650638	0.598411	0.704175	0.738817	0.67301
MIR-512-3P;NA	2430	4247	1790	2944	32735	35014	28020	32994	15290	23510	13177	24972	0.284933	0.449611	0.329866	0.337616	0.350506	2.37512	2.37553	2.43352	2.36029	2.38612	4.36902	4.34754	3.76427	3.70924	4.04751
MIR-671-5P;hsa-miR-671-5p|10x|1x	12	28	11	19	99	82	76	77	7684	12234	7537	13778	0.00140708	0.00296423	0.00202711	0.0021789	0.00214433	0.00718306	0.0055633	0.00660057	0.00550834	0.00621381	2.19565	2.26235	2.15309	2.04653	2.1644
MIR-582-5P-2;NA	6	19	2	9	742	783	614	701	1039	1431	984	1555	0.000703538	0.00201144	0.000368565	0.00103211	0.00102892	0.0538366	0.0531227	0.0533256	0.0501473	0.0526081	0.296887	0.264625	0.281099	0.230973	0.268396
EBV-10;NA	17659	26839	12457	18677	10197	11704	9154	10575	712	937	691	1018	2.07063	2.84132	2.29561	2.14186	2.33736	0.739855	0.794059	0.795021	0.756502	0.771359	0.203449	0.173273	0.197398	0.15121	0.181332
MIR-342-3P;hsa-miR-342-3p|1x|8x	56	96	40	60	1644	1801	1295	1575	1510	2452	1182	1464	0.00656635	0.0101631	0.00737131	0.00688075	0.00774537	0.119282	0.122189	0.11247	0.112671	0.116653	0.431472	0.453431	0.337661	0.217457	0.360005
MIR-654-5P-hsa;NA	70263	75463	41524	57801	48239	53794	39537	50049	4619	7491	4905	10179	8.23878	7.98893	7.65216	6.62857	7.62711	3.50004	3.64966	3.43377	3.58035	3.54095	1.31985	1.38526	1.40121	1.51195	1.40457
MIR-291B-3P-rno;NA	45	94	29	42	947	1128	807	961	5519	8625	6868	14346	0.00527653	0.00995136	0.0053442	0.00481653	0.00634715	0.0687107	0.0765292	0.0700876	0.0687469	0.0710186	1.57702	1.59496	1.96198	2.1309	1.81621
MIR-586;NA	423	764	245	468	20341	21202	17990	21654	2123	2849	1937	3876	0.0495994	0.0808812	0.0451493	0.0536699	0.0573249	1.47586	1.43845	1.56242	1.54906	1.50645	0.606633	0.526846	0.553342	0.575725	0.565636
HIV1-H1;NA	1783	1953	1137	2098	9335	10766	7091	8729	3861	6557	3662	5985	0.209068	0.206755	0.209529	0.240597	0.216487	0.677311	0.73042	0.61585	0.624445	0.662007	1.10325	1.21254	1.04612	0.888987	1.06273
KSHV-K12-4-3P;NA	2453	3596	1704	2759	39434	34832	29808	33974	2269	3103	2450	4419	0.28763	0.380692	0.314018	0.3164	0.324685	2.86118	2.36318	2.58881	2.43039	2.56089	0.648352	0.573816	0.69989	0.65638	0.644609
EBV-1-2-star;NA	7	17	8	16	54	69	61	56	5452	9381	7327	14898	0.000820794	0.00179971	0.00147426	0.00183487	0.00148241	0.00391803	0.00468131	0.00529782	0.00400606	0.00447581	1.55787	1.73476	2.0931	2.21289	1.89966
MIR-290-3P-mmu;NA	17	34	19	17	251	293	242	258	1139	1900	1516	3125	0.00199336	0.00359943	0.00350137	0.00194955	0.00276093	0.0182116	0.0198786	0.0210176	0.0184565	0.0193911	0.325462	0.351354	0.433075	0.464175	0.393516
MIR-629-star;NA	114	205	97	97	205	235	209	205	2268	4458	3492	6711	0.0133672	0.0217024	0.0178754	0.0111239	0.0160172	0.014874	0.0159436	0.0181516	0.0146651	0.0159086	0.648066	0.824387	0.997558	0.996824	0.866709
MIR-7-star;NA	40	57	27	37	596	553	419	519	6844	9417	6451	12965	0.00469025	0.00603433	0.00497563	0.00424313	0.00498584	0.0432435	0.0375183	0.03639	0.0371276	0.0385698	1.95563	1.74142	1.84285	1.92577	1.86642
MIR-506;NA	119236	134899	80744	144190	5372	4761	4170	4794	470	876	451	710	13.9812	14.2811	14.8797	16.5356	14.9194	0.389772	0.32301	0.362163	0.342948	0.354473	0.134299	0.161993	0.128837	0.10546	0.132647
MIR-347;NA	3	2	2	1	155	196	123	159	4187	7758	5824	10862	0.000351769	0.000211731	0.000368565	0.000114679	0.000261686	0.0112462	0.0132976	0.0106825	0.0113744	0.0116502	1.19641	1.43463	1.66374	1.6134	1.47704
MIR-466D-5P;NA	43	45	13	22	20419	22609	17983	20449	4490	7066	4402	8871	0.00504202	0.00476395	0.00239568	0.00252294	0.00368115	1.48152	1.53391	1.56182	1.46286	1.51003	1.28299	1.30667	1.25752	1.31766	1.29121
MIR-624;NA	28	41	21	35	215	235	181	195	2274	3881	2694	5285	0.00328318	0.00434048	0.00386994	0.00401377	0.00387684	0.0155996	0.0159436	0.0157198	0.0139497	0.0153032	0.64978	0.717686	0.769593	0.785012	0.730518
MIR-469;NA	45	61	27	29	5381	5533	4367	5646	3777	5448	3293	5719	0.00527653	0.00645779	0.00497563	0.0033257	0.00500891	0.390425	0.375387	0.379272	0.403897	0.387245	1.07925	1.00746	0.940709	0.849477	0.969225
MIR-297B;NA	148	299	109	184	188	199	168	214	2717	4239	2833	5185	0.0173539	0.0316538	0.0200868	0.021101	0.0225489	0.0136406	0.0135012	0.0145907	0.0153089	0.0142603	0.776365	0.783889	0.809301	0.770158	0.784928
MIR-710;NA	29	35	13	15	353	445	285	381	9185	12646	7134	13653	0.00340043	0.00370529	0.00239568	0.00172019	0.0028054	0.0256123	0.0301911	0.0247521	0.0272555	0.0269528	2.62455	2.33854	2.03797	2.02796	2.25725
MIR-191-star;NA	4453	6879	2985	4593	59420	60556	48759	59089	6085	9384	6030	13010	0.522142	0.728249	0.550084	0.526722	0.581799	4.31129	4.10843	4.2347	4.22704	4.22036	1.73875	1.73532	1.72259	1.93245	1.78228
MIR-518B;NA	343	465	210	244	573	707	501	623	4191	6499	4681	8846	0.0402189	0.0492275	0.0386994	0.0279817	0.0390319	0.0415747	0.0479665	0.0435116	0.0445675	0.0444051	1.19755	1.20181	1.33722	1.31395	1.26263
EBV-15;NA	1	2	3	2	174	182	145	175	189	366	339	622	0.000117256	0.000211731	0.000552848	0.000229358	0.000277798	0.0126248	0.0123478	0.0125932	0.0125189	0.0125212	0.0540055	0.0676818	0.0968419	0.0923893	0.0777296
MIR-587;NA	45	74	37	36	3293	3569	2855	3430	1893	3379	2382	4489	0.00527653	0.00783405	0.00681846	0.00412845	0.00601437	0.238927	0.242139	0.247956	0.245371	0.243598	0.540912	0.624855	0.680465	0.666778	0.628252
MIR-92B;hsa-miR-92b-3p|1x|5x	26030	27579	15851	22864	157861	168165	128864	162112	480	753	715	1059	3.05218	2.91966	2.92107	2.62203	2.87873	11.4538	11.4092	11.1918	11.597	11.4129	0.137157	0.139247	0.204254	0.157299	0.159489
HCMV-US33-3P;NA	825	1324	570	414	1188	1219	931	1107	551	992	919	1531	0.0967364	0.140166	0.105041	0.0474772	0.0973552	0.0861967	0.0827031	0.0808569	0.0791913	0.082237	0.157445	0.183444	0.26253	0.227408	0.207707
MIR-146B-5P;hsa-miR-146b-5p|1x|1x	28791	50583	21061	22845	16037	18963	14811	16732	4913	8992	6282	11588	3.37593	5.35499	3.88118	2.61985	3.80799	1.16358	1.28655	1.28633	1.19695	1.23335	1.40386	1.66283	1.79458	1.72123	1.64562
MIR-338-3P-2;hsa-miR-338-3p|1x|1x	2	1	0	0	1300	1439	1041	1365	746	1247	971	1849	0.000234513	0.000105865	0	0	8.50945e-05	0.094323	0.097629	0.0904104	0.0976478	0.0950026	0.213165	0.230599	0.277385	0.274643	0.248948
MIR-511-hsa;NA	72231	99257	52240	69118	11987	12861	10357	11881	6684	10844	6986	13876	8.46954	10.5079	9.62693	7.9264	9.13269	0.86973	0.872555	0.899501	0.849929	0.872929	1.90991	2.00531	1.99569	2.06108	1.993
MIR-299-5P;hsa-miR-299-5p|5x|1x	50	77	26	27	16	21	19	17	3210	5999	4821	9797	0.00586281	0.00815164	0.00479135	0.00309634	0.00547554	0.0011609	0.00142475	0.00165014	0.00121613	0.00136298	0.917236	1.10935	1.37721	1.45521	1.21475
MIR-425-star;NA	108	154	54	99	2866	3677	2526	3001	1429	2178	1573	2808	0.0126637	0.0163033	0.00995127	0.0113532	0.0125679	0.207946	0.249466	0.219382	0.214682	0.222869	0.408327	0.402762	0.449358	0.417089	0.419384
MIR-383-hsa;NA	5121	8313	3751	4433	11379	13706	9807	11806	8821	13527	7305	13359	0.600469	0.88006	0.691244	0.508373	0.670037	0.825616	0.929884	0.851734	0.844564	0.86295	2.52054	2.50145	2.08681	1.98429	2.27328
MIR-136;hsa-miR-136-5p|1x|8x	0	0	0	0	28	20	19	23	413	691	474	1031	0	0	0	0	0	0.00203157	0.0013569	0.00165014	0.00164535	0.00167099	0.118012	0.127782	0.135407	0.15314	0.133585
MIR-507;NA	7	10	5	2	56	60	61	59	1391	1910	1665	3437	0.000820794	0.00105865	0.000921414	0.000229358	0.000757555	0.00406314	0.0040707	0.00529782	0.00422067	0.00441309	0.397469	0.353203	0.47564	0.510518	0.434207
MIR-153;NA	240	387	163	248	10607	11523	9201	11238	9451	13459	8607	16269	0.0281415	0.0409699	0.0300381	0.0284404	0.0318975	0.769603	0.781779	0.799103	0.803931	0.788604	2.70056	2.48888	2.45876	2.41653	2.51618
EBV-14-5P;NA	2206	2788	1424	2499	368	367	267	364	2015	2694	2093	3936	0.258667	0.295153	0.262419	0.286583	0.275706	0.0267007	0.0248991	0.0231888	0.0260394	0.025207	0.575773	0.498183	0.597906	0.584637	0.564125
MIR-207-mmu;NA	988	1800	661	1005	603	613	466	589	3156	5156	3427	7760	0.115849	0.190558	0.121811	0.115253	0.135868	0.0437513	0.041589	0.0404719	0.0421352	0.0419869	0.901806	0.953463	0.978989	1.15264	0.996724
MIR-886-3P;NA	20	12	10	14	312	335	313	351	858	1893	987	1430	0.00234513	0.00127039	0.00184283	0.00160551	0.00176596	0.0226375	0.0227281	0.0271839	0.0251094	0.0244147	0.245168	0.350059	0.281956	0.212406	0.272397
MIR-485-3P-2;NA	2145	3404	1635	2253	293	322	257	312	1751	2253	1717	3076	0.251515	0.360366	0.301302	0.258372	0.292889	0.0212589	0.0218461	0.0223203	0.0223195	0.0219362	0.500337	0.416632	0.490494	0.456896	0.46609
MIR-582-5P;NA	23	23	14	26	1002	1002	835	943	5005	6972	4900	9219	0.00269689	0.00243491	0.00257996	0.00298166	0.00267335	0.0727012	0.0679808	0.0725194	0.0674592	0.0701652	1.43015	1.28928	1.39978	1.36935	1.37214
MIR-452-star-hsa;NA	1388	1634	850	1400	2894	3334	2461	2952	9892	15813	9882	18168	0.162752	0.172984	0.15664	0.160551	0.163232	0.209977	0.226195	0.213737	0.211177	0.215272	2.82657	2.92419	2.82299	2.6986	2.81809
MIR-299-3P;NA	575	823	405	591	1995	2119	1617	1982	5262	8277	5222	9792	0.0674224	0.0871273	0.0746345	0.0677754	0.0742399	0.144749	0.143764	0.140436	0.141786	0.142684	1.50358	1.53061	1.49177	1.45446	1.4951
Total reads	8204251	9087003	5220240	8388618	13258701	14179366	11076624	13447615	3366658	5202164	3367529	6476550
