# Supplementary material
Source: HighWire-hosted journal article supplement (doi:10.1101/rna.080566.125)
Supplement: SupplementalTable3.xlsx [file SupplementalTable3.xlsx]

## Sheet: Table S3
Spike-in small RNA sequences
UGCUAGUUAUCGACCUUCAUAG
UGCUAGUCUUAUCGACCUCCUCAUAG
UGCUAGUCUGUUAUCGACCUGACCUCAUAG
UGCUAGUUCGAUACCUUCAUAG
UGCUAGUCUUCGAUACCUCCUCAUAG
UGCUAGUCUGUUCGAUACCUGACCUCAUAG
UGCUAGUUGUCACGAAUCAUAG
UGCUAGUCUUGUCACGAACCUCAUAG
UGCUAGUCUGUUGUCACGAAGACCUCAUAG
Mouse tissue	Total RNA, ng	Spikein, attomol	Spikein reads	Small RNA reads	Small RNAs per 10 pg total RNA	miR-derived fraction, ppm	miRNAs per 10 pg total RNA
brain_amygdala_F1	1182	400	16692	5858809	715293	930400	665509
brain_amygdala_M1	1410	400	11528	6340556	939626	932679	876369
brain_amygdala_M2	1470	400	13580	6986330	843010	930173	784145
brain_caudate_putamen_F1	1256	300	12978	11126830	1.23321e+06	927334	1.14359e+06
brain_caudate_putamen_M1	1336	300	15295	14933003	1.32024e+06	934797	1.23416e+06
brain_caudate_putamen_M2	576	300	50524	11203527	695499	911476	633931
brain_cerebellum_M1	1872	400	12697	7174724	727108	941438	684527
brain_cerebellum_M2	2160	400	12412	7251071	651489	945004	615660
brain_cortex_F1	1362	400	12405	5834876	831876	935899	778552
brain_cortex_M1	1998	400	9030	7187087	959556	939476	901480
brain_cortex_M2	1452	400	10816	6593207	1.01126e+06	939986	950573
brain_hipocampus_F1	1512	300	16439	16957861	1.23255e+06	932733	1.14964e+06
brain_hipocampus_M1	2016	300	20037	21139123	945422	934948	883920
brain_hipocampus_M2	1480	300	20182	16271243	984140	931215	916446
brain_hypothalamus_F1	952	300	28908	9814754	644297	914279	589068
brain_hypothalamus_M1	912	300	32273	15641047	960050	916683	880061
brain_hypothalamus_M2	768	300	32626	9589073	691375	905881	626303
brain_nucleus_acumbens_F1	1344	300	23552	12279428	700831	925461	648591
brain_nucleus_acumbens_M1	920	300	17524	11548219	1.29406e+06	931347	1.20522e+06
brain_nucleus_acumbens_M2	1016	300	18830	14335930	1.35377e+06	926662	1.25448e+06
brain_thalamus_F1	1160	300	19916	10310151	806245	925839	746453
brain_thalamus_M1	1448	300	21224	18560320	1.09107e+06	927119	1.01155e+06
brain_thalamus_M2	1728	300	20499	16030792	817599	923212	754818
colon_M1	1902	400	18964	10958131	731807	914062	668917
colon_M2	1548	400	23532	10335312	683431	917540	627075
colon_M3	2148	400	17513	12706436	813635	927312	754494
heart_F1	3780	400	2459	5389984	1.39681e+06	843223	1.17782e+06
heart_F2	3990	400	1342	3565616	1.60402e+06	631398	1.01278e+06
heart_M1	4050	400	2757	5545521	1.19633e+06	866862	1.03705e+06
heart_M2	4740	400	888	4372263	2.50216e+06	479872	1.20072e+06
ileum_M1	4554	400	10800	12735476	623734	910190	567716
ileum_M2	2808	400	16619	12606059	650696	887749	577655
ileum_M3	3396	400	5956	7654555	911587	730038	665493
jejunum_M1	2682	400	10878	8064877	665872	896150	596721
jejunum_M3	5022	400	10511	13226276	603556	884178	533651
kidney_F1	1692	400	9876	5890149	849074	875563	743418
kidney_F2	1758	400	9970	7104320	976358	820631	801230
kidney_M1	1860	400	8711	5445439	809567	890656	721046
liver_F1	2238	400	10274	5617357	588482	887163	522079
liver_M1	2190	400	15546	6482372	458640	875382	401485
liver_M2	2064	400	15838	7148388	526743	886462	466938
lung_F1	2550	400	4272	7743549	1.71226e+06	477508	817617
lung_F2	2940	400	4798	7526621	1.28527e+06	550227	707188
lung_M1	1890	400	5964	7924583	1.69347e+06	511744	866624
lung_M2	3300	400	3406	9071065	1.94402e+06	465298	904548
sk_muscle_F1	2940	400	3162	8382869	2.17212e+06	868963	1.88749e+06
sk_muscle_M1	1470	400	8379	6216147	1.21566e+06	843834	1.02582e+06
sk_muscle_M2	2580	400	3663	7084948	1.80585e+06	713595	1.28864e+06
spleen_F1	3750	400	8561	6684491	501549	542190	271935
spleen_F2	3510	400	8176	6166913	517631	395146	204540
spleen_M1	3180	400	7659	4691545	463999	435953	202282
spleen_M2	3180	400	10287	6715475	494495	335427	165867
Cell line	Number of cells	Spikein, attomol	Spikein reads	Small RNA reads	Small RNAs per cell	miR-derived fraction, ppm	miRNAs per cell	Total RNA per cell, pg	miRNAs per 10 pg total RNA
C2C12_differentiated_day7_rep1	100000	300	5512	3190091	1.04558e+06	903070	944229	26.3	359022
C2C12_differentiated_day7_rep2	100000	300	6396	4081640	1.15289e+06	905472	1.04391e+06	28.35	368222
C2C12_undifferentiated_rep1	100000	300	7781	1796963	417221	856941	357533	30.05	118980
C2C12_undifferentiated_rep2	100000	300	8605	1861211	390757	851931	332898	18.9	176136
K562_rep1	83000	300	82095	4798929	127236	629545	80101.1	21.22	37747.9
K562_rep2	62500	300	73358	4256059	167704	617732	103596	21.08	49144.1
K562_rep3	119600	300	73991	4942514	100902	692747	69899.6	21.38	32693.9
A549_rep1	100000	400	20526	8907134	1.04528e+06	744214	777915	50.4	154348
A549_rep2	100000	400	18974	9143910	1.16084e+06	743766	863396	52.8	163522
HCC_38_rep1	100000	400	10312	1525060	356242	692119	246562	23.4	105368
HCC_38_rep2	100000	400	12027	2222361	445100	694460	309104	28.5	108458
HEK293T_rep1	50000	400	20648	1336667	311872	561289	175050	30	58350.1
HEK293T_rep2	50000	400	21032	1814448	415618	563707	234287	36.8	63664.9
HEK293T_rep3	50000	400	23666	1729661	352101	551135	194055	38.4	50535.2
HEK293T_rep4	50000	400	49220	7552322	739213	561017	414711	58.72	70625.2
HEK293T_rep5	50000	400	40334	5415647	646859	558712	361408	43.84	82438
HEK293T_rep6	50000	400	43178	4019364	448462	541873	243009	31.04	78289.1
HepG_2_2_15_rep1	100000	400	42049	9975570	571456	608351	347646	29.4	118247
HepG_2_2_15_rep2	100000	400	25637	6888048	647187	614682	397814	28.8	138130
HepG_2_rep1	100000	400	42441	7263844	412270	568375	234324	63.6	36843.4
HepG_2_rep2	100000	400	45643	7721755	407514	568504	231673	46.8	49502.9
Huh_7_5_miR122KO	100000	400	33657	7896321	565132	556564	314532	54	58246.7
Huh_7_5	100000	400	49270	8040294	393088	559122	219784	31.8	69114.6
MCF_7_rep1	100000	400	47004	4302594	220494	648658	143025	14.4	99322.9
MCF_7_rep2	100000	400	10184	3217436	761013	589852	448885	26.76	167745
MD_MB_231_rep1	100000	400	9186	4798447	1.25827e+06	682878	859247	33	260378
MD_MB_231_rep2	100000	400	33045	10662331	777226	688110	534817	33.9	157763
MDA_MB_468_rep1	100000	400	13765	4089574	715653	686838	491538	25.68	191409
MDA_MB_468_rep2	100000	400	8374	2865292	824208	643478	530360	24.6	215593
SkBr3_rep1	100000	400	37641	6197664	396614	557997	221309	27.84	79493.2
SkBr3_rep2	100000	400	31244	5823103	448940	569293	255579	26.58	96154.5
