# Supplementary material
Source: HighWire-hosted journal article supplement (doi:10.1101/rna.080566.125)
Supplement: SupplementalTable4.xlsx [file SupplementalTable4.xlsx]

## Sheet: Table S4
Sample name	rRNA reads	All non-rRNA reads	mRNA reads	rRNA adjustment coefficient (see Methods)	mRNA fraction in total RNA	miRNAs per 10pg total RNA (from Table S3)	miRNAs per 10pg mRNA	Mean length of mRNAs (see Methods)	Mean molecular weight of mRNAs	mRNAs per 10pg mRNA	miRNA/mRNA molar ratio
A549_rep1	4601156	6670212	1689396	0.179182	0.0522242	154348	2.95549e+06	2080.83	686674	8.77002e+06	0.337
A549_rep2	4951394	4421498	1697627	0.201954	0.0586624	163522	2.78751e+06	2051.57	677018	8.8951e+06	0.313376
HCC_38_rep1	5719550	5248638	1409849	0.218347	0.0448377	105368	2.34999e+06	2275.45	750898	8.01991e+06	0.29302
HCC_38_rep2	5212900	7143894	1843683	0.200365	0.0555982	108458	1.95074e+06	2313.35	763406	7.88852e+06	0.247289
HEK293T_rep4	4236413	8554482	2114867	0.182353	0.0665336	70625.2	1.0615e+06	2186.53	721555	8.34606e+06	0.127185
HEK293T_rep5	4900979	7099391	1599758	0.192143	0.0490628	82438	1.68025e+06	2269.21	748839	8.04197e+06	0.208936
HEK293T_rep6	5797545	8849784	1646816	0.226604	0.047825	78289.1	1.63699e+06	2356.03	777490	7.74562e+06	0.211344
HEK293T_rep1	5035540	7536549	1338629	0.196228	0.0403223	58350.1	1.44709e+06	2224.3	734019	8.20434e+06	0.176381
HEK293T_rep2	5712757	6872743	1250720	0.220223	0.038116	63664.9	1.67029e+06	2233.37	737012	8.17102e+06	0.204417
HEK293T_rep3	4875446	6780404	1335951	0.209034	0.0443777	50535.2	1.13875e+06	2257.5	744975	8.08368e+06	0.14087
HepG_2_2_15_rep1	4512620	6900323	2564137	0.171822	0.0773175	118247	1.52937e+06	1921.16	633983	9.4989e+06	0.161005
HepG_2_2_15_rep2	4109913	6061471	2304794	0.172251	0.077028	138130	1.79324e+06	1985.25	655132	9.19225e+06	0.195082
HepG_2_rep1	7249858	6545057	2002529	0.233474	0.0532628	36843.4	691729	2144.56	707705	8.5094e+06	0.08129
HepG_2_rep2	6149217	6216781	1781703	0.225772	0.0532596	49502.9	929464	2170.76	716351	8.40669e+06	0.110562
Huh_7_5_miR122KO	4260744	6935939	1460132	0.188983	0.0495268	58246.7	1.17606e+06	2196.47	724835	8.30829e+06	0.141553
Huh_7_5	4700445	7558523	1431820	0.198068	0.0457596	69114.6	1.51038e+06	2098.76	692591	8.69509e+06	0.173705
K562_rep1	6035759	5239283	682353	0.271999	0.0248764	37709.8	1.51588e+06	2106.37	695102	8.66368e+06	0.17497
K562_rep2	818239	1053846	200670	0.168939	0.0340278	49118.5	1.44348e+06	2051.8	677094	8.8941e+06	0.162296
MCF_7_rep1	6670485	6843293	1658272	0.195172	0.0404252	99322.9	2.45695e+06	2140.84	706477	8.52418e+06	0.288233
MCF_7_rep2	6756902	4674264	1127461	0.228235	0.0328905	167745	5.1001e+06	2296.98	758003	7.94474e+06	0.641947
MD_MB_231_rep1	2601371	4111935	793062	0.168431	0.040552	260378	6.42084e+06	2290.01	755703	7.96892e+06	0.805735
MD_MB_231_rep2	5880682	6946836	1473331	0.176815	0.0366447	157763	4.3052e+06	2351.74	776074	7.75975e+06	0.554812
MDA_MB_468_rep1	4381820	6012694	1149636	0.187278	0.0390898	191409	4.89664e+06	2219.71	732504	8.2213e+06	0.595604
MDA_MB_468_rep2	2385429	3360985	670117	0.207338	0.0450772	215593	4.78276e+06	2171.93	716737	8.40216e+06	0.569229
C2C12_dd7_rep1	7869468	4209341	644638	0.322716	0.0225442	364567	1.61712e+07	2930.08	966926	6.22813e+06	2.59648
C2C12_dd7_rep2	8281498	4646813	674630	0.333335	0.0228756	403054	1.76194e+07	2943.09	971220	6.2006e+06	2.84156
C2C12_undif_rep1	7256965	4355732	594730	0.329893	0.0225673	138044	6.11699e+06	2649.45	874318	6.88781e+06	0.88809
C2C12_undif_rep2	7789121	3621295	514754	0.325013	0.0186594	128532	6.88832e+06	2657.27	876899	6.86754e+06	1.00303
SkBr3_rep1	2493586	4596560	2063929	0.185801	0.114553	79493.2	693945	2010	663300	9.07906e+06	0.0764336
SkBr3_rep2	2786584	4308812	1809283	0.172856	0.0885618	96154.5	1.08573e+06	2023.42	667729	9.01885e+06	0.120385
mouse_brain_amygdala_rep1	3434118	2895192	510089	0.308324	0.0363487	665509	1.8309e+07	3153.65	1.0407e+06	5.7866e+06	3.16404
mouse_brain_amygdala_rep2	2623840	2210957	391843	0.334603	0.0389793	876369	2.2483e+07	3118.91	1.02924e+06	5.85105e+06	3.84255
mouse_brain_caudate_putamen_rep1	7282307	4481010	933184	0.344041	0.0363843	1.14359e+06	3.1431e+07	3162.02	1.04347e+06	5.77128e+06	5.44611
mouse_brain_caudate_putamen_rep2	6024566	3165874	521814	0.351546	0.0257011	1.23416e+06	4.80197e+07	3161.59	1.04332e+06	5.77207e+06	8.31932
mouse_brain_caudate_putamen_rep3	5023138	3622049	651276	0.363778	0.0373646	633931	1.69661e+07	3117.86	1.02889e+06	5.85302e+06	2.89869
mouse_brain_cerebellum_rep1	685603	1278221	145649	0.319519	0.0425382	684527	1.60921e+07	3013.68	994514	6.05536e+06	2.65749
mouse_brain_cerebellum_rep2	95350	271235	23716	0.283746	0.0390531	615660	1.57647e+07	2927.7	966141	6.23319e+06	2.52915
mouse_brain_cortex_rep1	2848486	2802635	521921	0.296422	0.042049	778552	1.85153e+07	3178.17	1.0488e+06	5.74196e+06	3.22457
mouse_brain_cortex_rep2	3345597	3082663	595645	0.308609	0.0427797	901480	2.10726e+07	3186.01	1.05138e+06	5.72783e+06	3.67899
mouse_brain_cortex_rep3	4550941	3766192	708571	0.335325	0.0408682	950573	2.32595e+07	3213.15	1.06034e+06	5.67945e+06	4.09537
mouse_brain_hipocampus_rep1	5781765	3469297	905460	0.244382	0.0333773	1.14964e+06	3.44439e+07	3280.63	1.08261e+06	5.56262e+06	6.19203
mouse_brain_hipocampus_rep2	5659029	3209721	782108	0.276275	0.03301	883920	2.67773e+07	3258.03	1.07515e+06	5.60121e+06	4.78063
mouse_brain_hipocampus_rep3	6251523	3849527	906125	0.272698	0.0338432	916446	2.70792e+07	3283.56	1.08357e+06	5.55766e+06	4.87241
mouse_brain_hypothalamus_rep1	5196435	2499319	509915	0.344267	0.0289831	589068	2.03245e+07	3146.67	1.0384e+06	5.79944e+06	3.50457
mouse_brain_hypothalamus_rep2	6893259	3090309	588798	0.340948	0.0252614	880061	3.48382e+07	3126.14	1.03163e+06	5.83752e+06	5.96798
mouse_brain_hypothalamus_rep3	6604535	3087200	659407	0.340043	0.0292942	626303	2.13798e+07	3186.88	1.05167e+06	5.72626e+06	3.73364
mouse_brain_nucleus_acumbens_rep1	3839459	3017915	483205	0.33542	0.033406	648591	1.94154e+07	3133.85	1.03417e+06	5.82316e+06	3.33418
mouse_brain_nucleus_acumbens_rep2	5574595	3757384	577964	0.347277	0.0291758	1.20522e+06	4.1309e+07	3145.93	1.03816e+06	5.8008e+06	7.12126
mouse_brain_nucleus_acumbens_rep3	5800807	3813521	713674	0.341561	0.0343166	1.25448e+06	3.65562e+07	3179.68	1.04929e+06	5.73923e+06	6.36952
mouse_brain_thalamus_rep1	6314853	3901164	673525	0.356538	0.0311634	746453	2.39529e+07	3101.58	1.02352e+06	5.88375e+06	4.07103
mouse_brain_thalamus_rep2	6160841	2546068	712118	0.270877	0.028158	1.01155e+06	3.59241e+07	3149.88	1.03946e+06	5.79353e+06	6.20073
mouse_brain_thalamus_rep3	5561280	2732305	622711	0.279507	0.0275182	754818	2.74298e+07	3144.74	1.03776e+06	5.803e+06	4.72683
mouse_colon_rep1	4824727	2372064	352411	0.344066	0.0214954	668917	3.11191e+07	2433.28	802982	7.49972e+06	4.14938
mouse_colon_rep2	6248071	3791388	564020	0.313802	0.0237961	627075	2.63521e+07	2504.03	826330	7.28782e+06	3.6159
mouse_colon_rep3	5078026	2913666	521630	0.286416	0.0252688	754494	2.98586e+07	2504.16	826373	7.28744e+06	4.09728
mouse_heart_rep1	6235444	2240615	289822	0.320182	0.0133464	1.17782e+06	8.825e+07	2599.17	857726	7.02105e+06	12.5693
mouse_heart_rep2	6050360	1740655	272753	0.376327	0.0153077	1.01278e+06	6.61613e+07	2653.41	875625	6.87753e+06	9.61991
mouse_heart_rep3	7125478	2711536	354119	0.330981	0.0146089	1.03705e+06	7.09876e+07	2480.11	818436	7.35811e+06	9.64754
mouse_heart_rep4	5969020	2468354	299061	0.315871	0.0139975	1.20072e+06	8.57812e+07	2529.75	834818	7.21372e+06	11.8914
mouse_ileum_rep1	7742276	4173628	653792	0.324152	0.0233011	567716	2.43643e+07	2338.97	771860	7.80211e+06	3.12278
mouse_ileum_rep2	6207077	3153287	517685	0.32335	0.0231632	577655	2.49384e+07	2393.92	789994	7.62302e+06	3.27146
mouse_ileum_rep3	6639946	3321122	549650	0.310836	0.0222686	665493	2.98848e+07	2364.88	780410	7.71663e+06	3.87278
mouse_jejunum_rep1	6789536	3476371	521595	0.308077	0.0204428	596721	2.91897e+07	2356.9	777777	7.74276e+06	3.76994
mouse_jejunum_rep2	7204563	3689354	634685	0.302325	0.0230628	533651	2.31391e+07	2447.03	807520	7.45758e+06	3.10276
mouse_kidney_rep1	309006	178341	22864	0.30206	0.0190321	743418	3.90612e+07	2537.66	837428	7.19124e+06	5.43178
mouse_kidney_rep2	6488524	3255952	473282	0.327013	0.0204904	801230	3.91027e+07	2499.79	824931	7.30018e+06	5.3564
mouse_kidney_rep3	5903730	2707738	446593	0.314965	0.0208184	721046	3.4635e+07	2411.39	795759	7.5678e+06	4.57662
mouse_liver_rep1	6487262	3105950	420829	0.284318	0.0162339	522079	3.21599e+07	2171.41	716565	8.40418e+06	3.82665
mouse_liver_rep2	4363764	1109508	247320	0.278713	0.014751	401485	2.72175e+07	2180.91	719700	8.36757e+06	3.25274
mouse_liver_rep3	7484999	4078233	479206	0.32811	0.0178205	466938	2.62023e+07	2189.84	722647	8.33345e+06	3.14423
mouse_lung_rep1	399856	442769	39422	0.296362	0.0219991	817617	3.7166e+07	2467.01	814113	7.39718e+06	5.02435
mouse_lung_rep2	266370	321127	28350	0.310364	0.0240381	707188	2.94195e+07	2512.12	829000	7.26435e+06	4.04984
mouse_lung_rep3	275131	240083	20420	0.321953	0.0186543	866624	4.6457e+07	2397.6	791208	7.61132e+06	6.10367
mouse_lung_rep4	441540	372980	31648	0.317964	0.0179652	904548	5.035e+07	2288.02	755047	7.97585e+06	6.3128
mouse_sk_muscle_rep1	2946454	2153075	365285	0.268574	0.0278338	1.88749e+06	6.7813e+07	2919.16	963323	6.25143e+06	10.8476
mouse_sk_muscle_rep2	4705654	4058606	598843	0.331947	0.0328412	1.02582e+06	3.12357e+07	2849.92	940474	6.40331e+06	4.87805
mouse_sk_muscle_rep3	4578295	2824420	470149	0.282458	0.0247015	1.28864e+06	5.21685e+07	2932.2	967626	6.22362e+06	8.38234
mouse_spleen_rep1	322089	677716	33151	0.281539	0.0181974	271935	1.49436e+07	2562.55	845642	7.12139e+06	2.09842
mouse_spleen_rep2	211045	344533	13457	0.26902	0.0119191	204540	1.71607e+07	2468.34	814552	7.39319e+06	2.32115
mouse_spleen_rep3	1706084	2441390	124462	0.283893	0.0147275	202282	1.3735e+07	2423.65	799804	7.52952e+06	1.82415
mouse_spleen_rep4	2187503	3408688	161536	0.289519	0.0147329	165867	1.12583e+07	2339.33	771979	7.80091e+06	1.4432
