# Supplementary material
Source: HighWire-hosted journal article supplement (doi:10.1101/rna.080566.125)
Supplement: SupplementalTable5.xlsx [file SupplementalTable5.xlsx]

## Sheet: Table S5 Mouse Tissues
miRNAs per 10 pg total RNA	brain_amygdala_F1	brain_amygdala_M1	brain_amygdala_M2	brain_caudate_putamen_F1	brain_caudate_putamen_M1	brain_caudate_putamen_M2	brain_cerebellum_M1	brain_cerebellum_M2	brain_cortex_F1	brain_cortex_M1	brain_cortex_M2	brain_hipocampus_F1	brain_hipocampus_M1	brain_hipocampus_M2	brain_hypothalamus_F1	brain_hypothalamus_M1	brain_hypothalamus_M2	brain_nucleus_acumbens_F1	brain_nucleus_acumbens_M1	brain_nucleus_acumbens_M2	brain_thalamus_F1	brain_thalamus_M1	brain_thalamus_M2	colon_M1	colon_M2	colon_M3	heart_F1	heart_F2	heart_M1	heart_M2	ileum_M1	ileum_M2	ileum_M3	jejunum_M1	jejunum_M3	kidney_F1	kidney_F2	kidney_M1	liver_F1	liver_M1	liver_M2	lung_F1	lung_F2	lung_M1	lung_M2	sk_muscle_F1	sk_muscle_M1	sk_muscle_M2	spleen_F1
mir-1a-TGGAATGTAAAGAAGTATGTA	214.509	77.5049	608.758	473.917	593.414	343.17	58.0695	56.6039	451.803	555.806	576.859	152.925	83.0969	111.108	130.701	237.111	274.774	268.759	515.576	464.699	412.188	695.837	372.007	1842.65	1835.91	2317.69	280340	264813	283316	311214	1464.04	1703.33	1970.96	1101.82	853.887	159.144	162.72	200.258	762.031	817.824	322.897	3752.88	2103.45	3557.88	5747.59	882859	494611	590555	306.655
mir-133a-TTGGTCCCCTTCAACCAGCTG	39.5567	12.0036	116.442	78.3582	82.4873	45.1312	11.4517	10.6919	62.1603	78.9051	84.6656	23.0406	13.9539	18.6289	23.9606	44.0096	57.1034	38.1822	76.4233	72.1458	71.2395	123.919	66.4553	433.082	428.495	488.254	72570.4	58985.3	55271.2	66502	293.954	321.062	371.206	203.108	153.6	32.2899	33.9456	48.7633	137.342	151.55	57.9918	834.73	493.162	820.388	1198.42	168057	93586.7	117985	66.4778
mir-133a-TTTGGTCCCCTTCAACCAGCT	30.8884	9.58315	119.982	53.9013	55.7282	26.6524	98.2352	81.1919	38.7315	54.6951	55.5234	15.7965	10.1076	14.1733	21.1599	44.8074	49.3886	23.7235	42.1337	41.676	58.2844	116.766	55.082	271.269	261.749	314.874	30839.4	25051.8	25295.5	29972.2	208.23	213.112	258.745	134.938	119.726	21.5746	20.4315	25.4719	80.911	89.1472	31.6117	363.595	225.008	366.921	685.935	92903.8	48630.3	67468.9	33.6892
mir-1a-GGAATGTAAAGAAGTATGTAT	9.03459	1.9265	21.9611	16.5139	21.0417	10.4292	2.63491	1.61726	18.1063	20.8277	20.5529	5.74198	3.08593	4.11288	4.39827	9.5753	10.7429	10.1021	17.7051	15.109	17.5166	27.335	14.4335	77.734	75.6483	95.0261	10015.4	9644.94	10309	11686	60.0446	71.5421	89.5564	48.1351	35.0006	7.35172	5.77213	9.66347	20.9523	23.3481	10.1688	154.342	90.675	147.452	224.596	31956	18288	21820.8	12.6053
mir-26a-TTCAAGTAATCCAGGATAGGC	23022	27499.5	25037	42410.5	52859.8	28877.7	42780.2	38638	24677.6	30955.8	32927.1	50262.1	31953.8	35966.3	19508.9	28310.4	21603	26286.4	49702.4	50751.5	29340.5	37758.4	31750	19463.7	19503.1	22778.1	26623.7	24599.6	20997.4	25782.3	15950.1	16099.8	17921.4	14879	12871.9	35799	38537.6	31124.6	12472.5	8848.45	11558	49332.6	43028	52553.1	53016.1	36100	18142.2	24153.7	7332.24
mir-143-TGAGATGAAGCACTGTAGCTC	2257.17	2913.33	2860.98	4211.95	4175.21	1802.57	2297.95	2041.06	2855.38	5152.86	4822.7	3426.15	3038.94	3150.65	2610.6	4477.86	3477.83	2044.26	4480.06	3728.83	2946.86	5152.86	3080.4	156475	138095	185707	35199.8	32272.4	27861.9	36187.5	132006	128233	183421	108923	92749.7	30599.4	29211.1	26300.5	4388.46	3486.02	5479.81	39971	32204.8	40730.2	41715.9	23502.8	15723.5	20089.3	5880.96
mir-30a-TGTAAACATCCTCGACTGGAA	4286.4	4934.67	4953.69	12927.2	13935.9	7015.71	8375.56	7423.01	7749.66	9686.34	9789.29	8487.3	6241.48	6581.86	3563.38	5300.3	4832.74	7016.37	12427.7	12503.8	7310.6	9014.08	7187.64	5428.32	5592.19	6654.86	23940.9	20319.6	20494.5	23240.3	3498.32	3390.72	4131.14	3436.58	3224.2	31443.1	32911.5	29836.2	10465.7	7826.87	9965.03	27526.4	23639.3	30240.6	30476.6	27096.4	14952.5	18615.7	1117.6
mir-29a-TAGCACCATCTGAAATCGGTT	27336.2	41733.6	35509	53012.2	60704.5	28870.8	18895.3	17354.2	34338	43539.8	44374.9	47465.6	41099.9	42986.5	22920.7	39630.7	25172.8	28619.6	58451.6	58815.8	30407.6	37179.3	28327	10592.4	9584.64	11836.5	31903.2	26122	24857.8	28168.9	8354.66	10124.9	10034.1	8780.99	8150	24096.4	25257.5	24175.6	13723.3	9673.08	12732.4	24697.6	20400.4	25641.7	24630.9	21859.2	14109.4	16555.8	12480.3
mir-378a-ACTGGACTTGGAGTCAGAAGG	277.63	356.551	333.279	1245.86	1229.09	643.072	471.245	423.81	304.671	371.161	406.916	559.008	366.289	391.993	266.324	348.823	323.514	741.787	1172.23	1167.74	600.099	428.189	557.093	6025.09	6092.37	6675.02	15199.1	12336.5	12385.5	14190.8	3263.42	3142.84	3611.55	4404.82	3888.45	6684.6	7277.29	5819.49	2577.55	1657.72	1514.34	601.006	452.693	578.483	634.786	18144.2	10772.1	12997.6	416.501
let-7f-TGAGGTAGTAGATTGTATAGT	15034.3	20001.3	18736	24038.5	29343.3	15551.4	16514.2	15095.7	17316.1	20513.8	21627.8	27135.7	19950.7	20266.1	13298.9	19821.2	14196.6	15405	28193	29369	17141.2	22958.2	18496.8	12755	12839.4	14190.6	22310.2	20863.5	21707.5	24185.2	9313.15	11032	10532.5	10503.5	8879.58	24434.9	27825.6	24349.5	17268.1	12105.8	13254	24172.3	20906.8	24804.8	26943.5	18872.6	9792.73	13077.7	8437.26
mir-22-AAGCTGCCAGTTGAAGAACTG	1619.62	2138.13	1845.46	4254.17	4253.1	2078.39	599.849	521.025	2130.84	2147.13	2273.54	2957.92	2209.18	2484.96	1468.56	1732.82	1432.85	2404.39	4146.91	3980.67	2059.14	2130.71	1862.58	2276.07	2095.53	2500.5	14541.6	10599.6	10280.1	12194.7	1898.66	1665.86	2091.95	2304.37	2327.33	5900.41	6425.89	8380.8	9018.49	6932.07	7490.34	4060.66	3287.18	4175.02	3982.52	15998.7	8600.75	10579.7	796.234
mir-16-TAGCAGCACGTAAATATTGGC	7376.82	6525.97	6319.51	14301.1	17620.3	9427.21	11323.5	10624.9	9148.39	11318.6	11769.1	12957.2	7678	9160.51	4937.09	6405.76	5746.68	7541.5	14640.7	15319.9	10276	14384.1	11898.4	12591.5	11426	13309.5	19544.7	15874.6	18456.5	23111.6	12245.8	14124.9	12952.3	12568.1	12108.8	18270.1	20391.9	22606.9	16811.6	11613.7	12977.4	20621.2	18665.5	22556.9	24096.1	16976.9	7806.76	12541.9	14673.3
mir-30c-TGTAAACATCCTACACTCTCA	5337.58	6324.74	6118.11	11123.8	11785.5	6752.53	6903.99	6108.18	7541.94	8800.13	9201.38	9164.73	6807.73	7143.56	5249.04	7481.15	6722.2	6629.2	11299.6	11727.9	7354.31	10899	8059.83	4258.15	4346.78	4969.18	17049.8	14723.8	14355.5	16469.7	2810.68	2991.04	3098.98	3192.02	2809.26	25508.8	27620.6	23841.9	6155.23	4389.65	5224.41	11311.6	9529.92	12189.8	11511.4	12227.6	7158.44	8516.48	1517.67
let-7a-TGAGGTAGTAGGTTGTATAGT	12060.1	15141.4	14865.9	16936.1	22606.2	12265.8	17338	15799.9	14446.3	17152.5	18104.8	18697.1	13948	13753.1	10385.6	14618.9	11192.4	12202	21468	22577.4	13734.5	18861.4	15634.5	7224.03	7959.37	8491.34	15846.3	16643.5	17192.6	19204.6	4443.06	5921.12	5277.28	5224.01	4375.03	14675.5	17163.9	13367.1	9292.95	6303.36	7049.4	19706.6	16925.8	19518.8	21261.9	13150.6	6927.49	9288.26	5407.1
mir-126a-TCGTACCGTGAGTAATAATGC	1749.78	2025.5	2180.67	2848.6	3340.08	1688.66	1210.13	1073.41	2409.85	3139.65	3084.16	2657.3	2143.21	2128.17	1685.59	2446.86	1903.44	1630.36	2895.57	3029.46	1936.83	3874.81	2384.9	1851.27	1767.21	2254.22	34689.3	26454.8	27842.7	31479	2299.43	2263.23	2541.64	2750.88	3307.99	10487.4	10990.4	10136.5	4286.31	3195.36	3971.28	38691.1	34601.6	42420.6	45035.1	11939	6341.39	9060.64	1934.62
mir-29c-TAGCACCATTTGAAATCGGTT	7054.76	9743.83	9024	13818.9	15072.8	7185.2	5779.08	4987.97	9583.54	11474.4	11655.7	11281	9935.06	10268.6	6177.6	12358	7413.2	6558.21	14121.2	14198.4	8589.17	12982.6	8157.17	2549.94	2283.98	2870.36	11634	9101.08	8830.66	9406.58	1740.56	1833.82	2128.99	1737.82	1618.83	7513.47	7603	8556.15	4255.72	3182.07	3322.62	6015.8	4704	6512.89	5914.97	9702.54	5684.1	6551.81	1228.42
let-7g-TGAGGTAGTAGTTTGTACAGT	11813.7	13972.1	12997.5	14837.2	17747.5	9596.77	17054.3	15749.4	14760	17363.3	18509.6	18953.8	12942.2	13653.8	9383.94	14371.2	10301.3	8863.76	16388.8	17574.1	10737.2	19419.6	12522.2	6714.34	6862.19	7378.56	10040.5	9066.89	9422.85	10349.1	4928.37	6020.59	5490.56	6157.32	5014.89	14233.5	16202.9	15253.7	9571.01	6480.12	7002.52	11317.2	9836.44	11321.7	12647.5	9518.56	4874.27	6679.52	5612.53
let-7c-TGAGGTAGTAGGTTGTATGGT	15476.4	16214.6	16926.8	14935.9	20149.7	11274.2	22683.1	20292.9	17201.4	20027.9	21326.2	39502.2	24070.6	26003.7	11578.9	14477.2	11545.6	10943	19859	21462.9	13653.8	19332.5	16725.4	8439.42	10609.7	11222.2	12809.3	14331.6	14512.3	16170.9	4581.57	5891.7	5761.5	5808.49	4650.52	16140.8	19362.2	14129.9	6254.92	4514.32	4520.77	22999.6	20195.8	23488.9	25974.6	10996.8	4779.21	7297.12	2774.37
mir-30e-TGTAAACATCCTTGACTGGAA	4945.56	6282.34	6029.54	9089.42	9876.22	4955.97	5409.89	4741.15	5916.92	7042.71	7321.58	8327.05	6792.02	7043.47	4518.99	6931.6	5448.32	4804.33	9431.98	9617.86	6480.44	10041.6	6602.13	5156.91	5084.21	5973.47	26317.5	20710.1	20254.4	23240.9	4481.26	4471.44	4866.88	5017.94	4782.66	29344.3	30556.2	26716.5	5113.72	3944.28	4262.72	6729.36	5785.28	7331.78	7054.67	9248.57	4722.89	6018.6	2950.33
mir-133a-TGGTCCCCTTCAACCAGCTGT	2.80803	0	4.46463	6.76074	7.60335	4.40757	0	0	5.98793	4.8064	8.12912	0	0	0	1.7068	2.20969	3.02821	3.59564	7.17168	6.42135	4.53555	7.34812	4.28416	19.9011	21.6231	21.2591	4477.59	3575.49	3331.73	4059.19	12.6358	15.3821	17.9828	8.58675	6.7993	2.59474	2.06146	1.93269	8.79998	8.27799	3.68435	60.8081	29.5419	47.8683	75.4369	7779.11	4597.92	5427.76	3.82662
mir-24-TGGCTCAGTTCAGCAGGAACA	3090.43	2770.17	2786.16	4878.37	5396.96	3109.15	2067.5	1890.39	4421.65	5184.77	5706.94	5017.92	3855.02	4212.73	2064.1	2547.84	2128.33	2829.53	4861.39	5190.53	3061.89	3787.68	3277.98	6572.55	6462.88	7199.78	17126.4	14391	14112.8	16164.1	3430.19	3590.79	4310.62	2918.65	2464.33	7186.97	7517.51	6495.93	2220.31	1547.34	1751.46	14113.5	12597.8	15086.7	14737	9143.63	4321.41	5205.5	2124.67
let-7d-AGAGGTAGTAGGTTGCATAGT	5390.82	7043.92	6547.2	7525.25	9841.04	5276.86	6702.82	6247.81	6009.73	6964.33	7627.72	9758.91	7326.26	7071.23	5124.44	7022.25	5360.51	5752.16	9792.82	10413.8	5961.04	8510.6	6840.67	3459.38	3490.19	3734.37	7013.62	6769	7252.82	7757.86	2055.53	2483.43	2449.94	2428.96	1991.57	5605.33	6568.68	5179.47	3144.62	1931.38	2045.63	6903.83	5978.58	7208.68	7347.61	7321.55	4152.43	5103.81	1590.6
mir-101a-TACAGTACTGTGATAACTGAA	4126.11	4377.76	3887.72	8541.93	8526.09	4701.52	10219	9252.58	4740.14	5877.68	6129.51	6730.85	5290.16	5780.34	2718.39	4779.11	3594.2	3571.83	7925.82	8461.65	5486.06	7573.68	5311.08	2767.91	2643.71	3434.36	9490.57	7774.9	6996.31	8392.51	2939.64	3129.94	3526.4	2851.12	2633.25	13035.5	13894.4	13263.1	6258.86	5082.24	5824.46	8181.24	7309.67	9119.15	9981.25	8977.53	4065.61	5562.37	2272.11
mir-21a-TAGCTTATCAGACTGATGTTG	1746.23	1307.07	2175.72	4178.36	4506.21	2424.54	1424.68	1273.86	1783.4	2122.29	2285.05	2082.95	1678.75	2005.2	1661.62	2909.79	2626.17	1364.12	2995.19	3206.25	4291.42	7407.14	4846.04	38212.3	30441.2	34552.8	3970.44	3309.16	3581.11	3973.91	43101.4	47307.2	49410.5	26391.2	28494	11427.8	12608.5	14862.4	18458.6	24149.6	26077	14926.5	14350.9	15354.2	16557.1	6245.18	4012.22	6177.38	14937.1
mir-451a-AAACCGTTACCATTACTGAGT	559.898	674.13	629.995	910.594	1096.21	520.53	552.522	445.822	742.788	1135.51	932.855	808.384	662.181	576.105	600.462	832.744	649.118	462.695	975.685	877.648	662.268	1381.62	864.178	464.002	681.227	497.475	32414.1	15849	34215.2	43215.9	501.319	900.368	612.604	759.92	1118.88	12872.3	15168	24657.9	8320.49	16399.8	11979.8	20891.3	17055.7	30498.1	32506.7	5391.14	3786.33	5548.59	9116.4
mir-26b-TTCAAGTAATTCAGGATAGGT	2542.25	2761.72	3111.13	3907.05	5060.91	2977.85	4691.16	4302.33	2566.54	3385.3	3549.82	3660.76	2955.76	3023.39	2482.59	4072.15	3216.32	2002.94	4144	4425.73	3827.61	6600.68	4737.71	6324.13	5833.42	6739.25	7633.26	7333.58	6756.42	7975.32	5429.98	6286.37	5968	6001.44	5163.02	12713.9	13982.4	12498.8	9481.27	6325.24	8436.37	13211.3	11377.2	13414.3	14429.1	7465.08	3668.8	5102.29	4332.33
mir-126a-CATTATTACTTTTGGTACGCG	2020.69	2349	2532.65	2757.39	3166.25	1655.33	1358.81	1277.72	2643.95	3556.47	3447.05	2761.38	2356.81	2367.74	1687.62	2641.5	1913.47	1531.85	2866.77	3037.77	2053.82	4038.11	2301.71	2383.79	2220.77	2865.61	17198	13919.5	14826.8	17527.3	2715.92	2673.96	3025.02	3151.15	3609.53	10488.6	10636.8	10204	7103.15	5096.27	6699.49	31095.3	28181.9	34722.2	39119.3	6704.58	3477.34	5124.2	1194.88
let-7i-TGAGGTAGTAGTTTGTGCTGT	4949.59	6269.31	5801	8294	9584.62	4985.85	6011.16	5394.08	5666.15	6562.48	7140.88	11644.3	6798.78	7557.95	4244.73	5909.8	4325.3	5523.81	9922.46	10894.9	6293	7031.33	5962.22	3500.38	3052.43	3414.13	5905.25	5416.3	5460.98	6373.49	2715.04	3137.53	3073.85	2771.45	2509.27	3933.03	4279.49	3724.3	1299.99	1012.6	1128.66	8653.99	8106.79	9127.69	10063.6	6370.6	3253.42	4308.59	3298.47
mir-125b-TCCCTGAGACCCTAACTTGTG	22225.7	27306.2	25878.8	28866.4	30906.3	17239	12049.8	9888.63	21884.4	25688.6	27390.3	37572.8	29659.1	29641.4	24090.5	33108.1	24682.5	19327.9	34014.9	37720.3	21339.4	34824.2	26874.8	3742.54	3792.52	4322.12	12101.8	10324.7	9698.32	10690.8	1823.04	2171.97	2573.43	1552.79	1289.23	6833.08	7541.97	5474.88	1657.74	1724.86	1697.3	8137.68	7260.83	9208.7	8507.47	6141.26	3097.75	4003.47	974.961
mir-99a-AACCCGTAGATCCGATCTTGT	5612.77	6708.1	6464.66	6806.4	6784.74	3789.77	4433.56	3593.99	4692.96	5494.51	5723.82	14431.6	10049.8	11115.9	5196.59	6491.93	4897.7	3468.75	6626.4	7327.43	5102.5	8228.19	6245.12	1037.59	909.031	1140.5	14833.4	12008.5	10502.8	13181.9	602.994	620.032	802.91	516.523	521.221	7727.39	8740.93	6004.88	2152.53	2358.44	2378.91	5699.84	4910.63	6238.71	6045.9	6845.53	3009.55	4561.42	474.2
mir-30d-TGTAAACATCCCCGACTGGAA	2593.04	2841.3	2777.84	4980.01	5885.25	3206.36	4971.78	4401.53	3122.99	3644.59	3890.62	3660.77	2843.54	2866.73	2307.06	3197.6	2654.59	2993.22	5270.28	5362.41	3401.97	4533.67	3859.62	2718.9	2713.4	3133.02	9450.41	8555.85	8070.87	9515.3	2022.47	2098.16	2238.31	2040.49	1874.48	7711.68	8402.85	7214.45	2188.88	1463.29	1752.21	10347.6	8850.47	11270.5	10811.9	5135.14	2871.88	3692.27	1363.4
mir-126a-CGTACCGTGAGTAATAATGCG	922.986	1068.92	1122.91	1369.99	1591.66	810.124	602.383	532.704	1220.4	1563.95	1575.67	1347.05	1111.07	1111.32	854.248	1237.92	951.795	787.671	1416.07	1490.8	952.546	1893.76	1188.24	1068.78	1029.84	1283.93	14393.2	11304.9	11679.4	13712.5	1199.33	1132.96	1315.36	1419.11	1614.18	4589.64	4798.28	4498.88	2689.86	1990.53	2531.89	19313.8	17392.2	21148.9	23207.7	5146.54	2749.45	3962.69	1141.61
mir-133b-TTTGGTCCCCTTCAACCAGCT	2.68594	0	11.3023	12.1546	9.34208	5.44222	58.644	47.1997	2.32864	3.78282	3.98788	1.35676	1.20754	1.61289	2.01314	5.03316	4.47022	2.98685	6.83551	5.91772	7.32466	12.7367	6.17122	19.9011	17.5674	22.3903	1171.87	883.519	859.466	964.867	12.5052	12.199	15.8788	8.39405	6.63199	1.48956	0	1.28847	4.99362	8.06569	2.13693	14.5202	8.42432	14.3178	38.2186	4892.6	2610.21	3297.02	1.20051
mir-30b-TGTAAACATCCTACACTCAGC	2064.15	2196.07	2122.63	4432.71	4611.62	2549.5	4102.26	3588.59	2596.48	2900.12	3123.42	2960.98	2274.74	2421.69	1779.07	2554.34	2189.76	2193.45	4006.84	4153.97	2788.03	3723.79	2938.67	2384.05	2329.61	2755.93	9492.13	8109.59	7107.41	8477.78	1940.87	1972.06	2091.95	2112.41	1829.7	6824.57	7457.17	6417.44	2289.87	1720.4	2159.77	7176.47	6433.32	7958.13	7420.05	4461.69	2531.2	3143.74	1120.83
mir-23a-ATCACATTGCCAGGGATTTCC	1894.81	1677.69	1460.05	2133.29	2637.92	1504.23	709.705	632.345	2500.24	3221.62	3395.05	2518.48	2001.84	1939.52	1453.66	1795.49	1456.07	1227.94	2547.4	2563.06	1659.54	3020.49	2242.6	7490.85	7327.54	7841.97	9248.51	7047.92	7023.71	8230.54	3874.45	3936.21	4654.18	3200.03	2625.5	6050.62	6342.48	5477.7	1486.77	1186.86	1330.05	9593.77	8721.54	11043.5	9416.13	5810.36	2527.87	3307.9	1084.58
mir-133a-AGCTGGTAAAATGGAACCAAA	0	0	2.05131	3.43579	3.09438	1.86237	0	0	3.13652	2.13618	0	0	0	0	0	0	0	1.88343	2.80144	0	0	2.99804	1.78506	11.6869	11.043	13.319	1751.09	1481.83	1466.96	1577.78	7.88518	8.05236	9.76547	5.53181	4.65458	0	0	1.78403	7.54281	7.07521	3.24223	27.64	12.8072	25.4302	41.1475	3916.53	2396.85	2618.68	1.50063
mir-206-TGGAATGTAAGGAAGTGTGTG	1.83133	1.48193	7.48127	73.149	76.829	56.8019	602.89	568.554	2.99396	2.13617	1.68717	2.47123	5.27741	4.53625	2.42889	2.70073	3.31662	28.6509	45.7196	42.1166	17.9076	9.22923	14.2805	1.1353	0.99189	0.960496	0	4.04872	2.1573	2.8614	0	0	0	0	0	0	0	1.48669	15.6095	39.2673	2.06324	0	0	2.13699	302.606	10930	2328.39	2004.16	0.600254
mir-145a-GTCCAGTTTTCCCAGGAATCC	238.927	282.307	278.979	398.108	486.968	225.593	212.212	182.121	294.264	492.39	480.078	349.388	307.521	313.304	306.238	458.326	385.52	247.072	490.027	408.606	318.505	525.243	355.024	11636.5	10259.6	12320.5	5804.94	5033.91	4286.75	5201.47	9101.33	9081.7	12292.2	6976.61	6490.88	2905.23	2824.08	2409.32	420.512	326.095	477.787	4806.05	3919.51	4895.4	4676.45	3308.12	2326.64	2872.31	1249.2
mir-29b-TAGCACCATTTGAAATCAGTG	11650.1	21251.5	18900.1	24352.9	29822.5	13227.6	4518.68	4064.97	14460.6	19181.4	19356.1	20565.5	21502.4	21090.1	12298.2	24043.3	14117.4	12811.6	28799.4	27515.4	15777.1	20300	14057.6	4564.62	3903.67	4832.46	8549.84	6571.08	6638.2	7236.51	3264.7	3607.66	3800.32	3060.66	3234.88	8888.19	8857.87	9854.05	4009.74	2801.56	3454.81	7758.65	5854.09	7455.51	7429.92	3800.69	2313.73	2658.44	3772.82
let-7b-TGAGGTAGTAGGTTGTGTGGT	4812	4822.65	5486.55	4706.7	6814.45	3820.63	7911.23	7319.48	5691.23	6289.71	6906.53	13849.7	7863.38	8653.72	3344	4227.87	3620.37	3754.41	6559.39	7455.4	4861.17	6728.34	6071.2	3727.58	5074.17	5219.87	5124.94	5648.41	5634.85	6208.09	2037.89	2874.18	2682.64	2801.74	2176.38	7767.9	9303.3	7075.74	2926.19	1782.1	1805.63	11282.9	9578.26	11200.1	12064.8	4844.66	2174.88	3298.97	1328.89
mir-142a-TGTAGTGTTTCCTACTTTATG	91.1999	124.334	123.441	170.681	175.761	79.6465	45.7057	35.8491	118.76	164.486	147.858	148.783	133.098	134.757	91.8388	138.412	134.395	77.9057	166.181	159.778	152.332	185.584	142.703	1424.93	671.507	1016.14	1452.8	1153.88	1404.18	1733.44	2857.17	7263.52	3237.12	3390.84	3721.65	1158.11	1134.5	1387.97	903.567	783.793	919.319	4093.15	3939.15	3818.57	4116.25	2801.54	2090	4189.02	26056.2
mir-27b-TTCACAGTGGCTAAGTTCTGC	1488.63	1313.73	1723.47	2594.36	2850.47	1595.79	812.063	737.558	1821.18	2077.44	2281.37	2446.95	2021.96	2226.21	1057.61	1519.34	1291.24	1210.99	2281.82	2472.41	2180.34	3025.14	2268.56	4354.53	4051.53	4771.82	5299.87	4402.75	4252.24	4915.9	2549.01	2392.48	2978.35	2367.37	2089.9	5397.9	5696.41	5014.75	2224.81	1381.71	1546.91	4194.23	3832.77	4463.31	4701.73	3792.42	1791.18	2084.45	611.132
mir-101a-GTACAGTACTGTGATAACTGA	2301.01	2784.54	2558.48	4769.43	4642.63	2583.21	3580.35	3154.27	2362.38	2807.21	2956.39	4193.83	3385.5	3595.5	1993.01	3688.02	2613.85	2153.33	4513.45	4769.47	3336.76	4490.17	3172.37	881.791	830.737	1085.43	1912.53	1583.05	1565.76	1788.38	746.491	810.657	964.396	773.876	670.533	5231.83	5374.81	5936.64	1171.86	811.596	858.749	2913.7	2645.63	3137.31	3466.03	2923.85	1677.75	1972.04	515.316
mir-150-TCTCCCAACCCTTGTACCAGT	1080.73	953.626	1001.52	1571.27	1476.64	879.097	647.075	606.2	1309.07	1376.64	1545.6	1506.72	999.935	1047.7	1166.26	1245.95	1143.01	950.333	1331.46	1497.78	1163.06	1848.5	1182.43	436.22	223.373	375.235	1554.12	1547.96	1495.44	1918.29	269.956	2349.02	362.631	324.643	269.738	454.222	518.117	427.423	186.475	100.114	161.89	2131.39	2134.37	2167.54	1948.08	2817.09	1665.04	3689.71	11275
mir-10b-TACCCTGTAGAACCGAATTTG	1.34298	5.03857	452.616	0	0	0	20.978	32.0754	0.997985	8.2777	5.82842	0	0	0	0.984686	7.54975	2.52351	0	0	0	1.64218	13.1679	2.6521	811.004	793.839	914.135	453.251	296.006	331.792	297.587	1008.12	947.133	1320.48	804.18	537.284	12276.3	13281.5	10262.6	30.6951	24.1971	26.6747	132.894	107.239	156.214	204.023	3109.13	1565.89	2537.63	49.2208
mir-100-AACCCGTAGATCCGAACTTGT	2207.35	2227.64	2991.54	3221.43	3245.48	1955.41	1533.73	1352.11	1829.74	2019.09	2284.28	2385.18	1962.35	2084.68	2248.11	3035.56	2710.25	1342.77	2591.56	3118.23	3694.75	6019.33	4371.01	731.665	693.129	901.841	1915.89	1680.68	1677.29	1987.53	569.053	584.519	729.313	585.051	586.614	672.899	714.781	567.32	441.883	382.768	403.878	1138.33	1072.05	1241.16	1423.88	2455.89	1552.2	1919.04	254.508
mir-125a-TCCCTGAGACCCTTTAACCTG	8487.74	12693.3	10472.3	12933	15532.9	8591.71	14910	13789	9496.11	10864.8	12135.9	15518.1	10818.8	12233	9587.4	13713.3	10024	9555.83	16906.6	18008.5	8694.95	12831	9838.99	2703.08	2783.7	2986	4530.46	3940.74	3625.33	4211.99	1542.46	1794.08	1972.87	1717.59	1444.7	8126.4	8980.33	7040.5	1143.89	739.851	1223.28	7619.38	6848.09	8410.1	8076.91	2762.68	1449.14	2039.07	848.982
mir-181a-AACATTCAACGCTGTCGGTGA	8178.31	6451.73	6580.26	11374	12764.8	7882.44	9315.35	8805.66	10351.1	10740	12487.1	11172.2	8324.39	9263.56	6626.99	8245.63	7652.34	5272.74	10096	11946.9	9873.68	17201.3	11713.4	2428.33	2344.5	2729.1	2325.34	2182.72	1912.44	2419.03	1836.51	2141.73	2422.66	1673.58	1511.14	3587.36	4022.89	3005.03	331.884	184.45	262.03	5624.2	5300.31	5942.95	6332	3284.27	1419.02	2215.2	1220.47
mir-23b-ATCACATTGCCAGGGATTACC	2357.65	1875.68	2194.91	3464.39	4085.91	2710.1	1143.96	1056.16	2734.2	3146.59	3528.35	4278.43	3360.37	3572.02	1761.28	2212.57	1944.98	2047.17	3625.06	3673.68	3002.69	3527.51	3127.33	4987.35	4789.43	5301.51	3794.73	3144.95	3256.22	3542.41	2245.7	2424.43	2693.36	2133.63	1613.86	6153.26	6294.91	5674.08	2013.83	1371.24	1406.17	4210.14	3802.72	4586.82	3825.87	2292.39	1268.82	1320.56	398.268
mir-27a-TTCACAGTGGCTAAGTTCCGC	330.371	340.695	310.714	407.861	445.06	199.955	177.958	148.607	485.877	648.464	642.661	411.243	390.439	387.698	217.485	328.753	224.304	166.711	401.165	402.941	302.162	580.501	358.951	2302.58	2237.43	2561.4	3809.25	2767.53	2637.51	3210.5	1388.42	1238.72	1663.81	971.62	924.756	1647.08	1753.07	1483.27	328.427	270.272	333.802	3736.05	3322.7	4085.92	4211.19	2715	1055.27	1600.93	632.819
mir-142a-GTAGTGTTTCCTACTTTATGG	47.1262	60.6109	65.0388	86.6705	93.7156	39.6682	22.4981	23.1806	63.4434	84.913	81.4445	74.573	66.9068	73.6688	47.3963	69.5438	57.6802	37.8969	83.4828	76.9618	78.7465	99.0527	70.4336	933.75	411.369	621.828	740.13	568.171	728.086	903.631	1767.79	4474.38	2036.57	2237.99	2508.5	720.758	713.683	859.606	581.321	499.436	604.601	2585.56	2463.25	2524.63	2447.64	1545.62	1030.63	2220.05	13101.3
mir-26a-TCAAGTAATCCAGGATAGGCT	1003.81	1180.51	1072	1856.54	2278.88	1244.24	1826.51	1659.21	1079.39	1350.46	1435.63	2204.2	1387.38	1542.2	851.555	1223.24	943.796	1144.78	2143.1	2214.42	1296.3	1665.79	1396.89	932.015	934.824	1086.52	1362.87	1306.84	1082.31	1402.66	769.12	764.717	852.094	733.251	608.698	1668.41	1776.44	1481.78	568.539	414.677	539.833	2202.36	1982.55	2458.61	2503.16	1989.74	986.626	1281.81	390.014
mir-486a-TCCTGTACTGAGCTGCCCCGA	52.9254	70.7621	69.3828	57.688	62.9928	34.9502	253.966	225.741	42.9135	53.805	54.9099	50.2241	48.7713	40.1912	79.2673	107.446	72.3164	42.2915	75.7508	80.1725	55.6386	87.9422	66.1749	38.6669	43.3455	37.9077	2862.18	1946.3	2333.43	2750.95	27.0838	36.184	44.1827	29.0626	28.4066	289.528	332.447	477.227	160.075	280.779	173.496	487.018	374.483	683.514	659.753	2061.77	976.065	1298.26	186.379
mir-486b-TCCTGTACTGAGCTGCCCCGA	52.8033	70.7621	69.1414	57.4663	63.1697	34.9502	253.966	225.202	42.9135	53.538	54.7565	50.0061	48.7713	40.0097	79.005	107.323	72.2445	42.3486	75.5267	79.8893	55.3259	87.7071	66.1238	38.7336	43.1471	37.9077	2860.36	1946.77	2333.86	2750.38	26.9858	36.184	44.3018	29.1452	28.4522	289.384	331.485	476.186	160.075	280.779	172.98	486.134	374.312	682.873	658.039	2056.33	972.35	1294.18	186.153
mir-101b-TACAGTACTGTGATAGCTGAA	1016.39	1529.65	1386.81	3239.06	3347.23	1678.66	1289.58	1167.3	982.878	1236.45	1264.92	2564.2	1633.36	1850.79	1002.74	1853.92	1364.86	1641.32	3232.07	3300.1	1835.34	2021.85	1707.54	628.954	636.196	756.489	909.355	755.762	767.349	860.139	705.892	764.249	782.665	777.013	734.099	1181.33	1254.75	1043.81	9900.56	7490.65	8400.34	1232.97	1052.41	1283.68	1327.65	2247.3	971.959	1280.29	476.301
mir-15a-TAGCAGCACATAATGGTTTGT	1302.93	1074.25	1138.84	2765.15	3038.94	1580.46	1240.74	1103.96	1516.23	1719.35	1867.25	1894.56	1303.93	1561.56	932.305	1324.27	1208.69	1096.9	2329.9	2350.88	2166.74	2916.74	2241.07	2426.6	2096.19	2424.81	2410.6	1835.87	2055.25	2490	2636.96	2836.96	2782.68	2585.33	2477.37	4452.55	4941.22	5830.49	4758.15	3416.54	3808.07	3413.22	3121.72	3770.92	3973.94	2069.03	962.766	1532.37	1701.87
mir-103-AGCAGCATTGTACAGGGCTAT	3302.21	4849.66	4538.12	5585.45	6817.34	3673.95	1998.99	1850.56	3189.9	3721.85	3924.93	7110.29	5271.2	5070.69	3810.65	5479.26	4125.63	4671.79	7757.61	8239.65	4423.37	6203.32	4995.61	2223.24	2341.31	2565.52	1188.89	1150.28	1337.52	1446.54	1609.5	1723.76	1724.4	2122.13	1783.59	2638.26	2931.88	3131.02	1571.01	987.342	925.999	2646.59	2405.25	2936.43	2967.41	1792.04	831.411	1483.77	779.156
mir-22-AGTTCTTCAGTGGCAAGCTTT	74.4742	84.0255	72.7614	145.744	150.122	84.8613	21.7887	20.036	99.6562	92.6568	100.617	140.207	95.619	98.8303	60.2628	72.9197	56.7429	85.2105	140.632	146.369	85.628	90.8228	74.8706	40.8039	42.4527	45.8478	734.688	608.208	619.575	667.28	24.1452	28.8543	29.0581	31.2918	36.8716	138.53	163.682	180.038	213.504	172.281	159.901	190.384	160.859	207.714	232.526	1635.01	830.371	1024.13	42.3929
mir-29a-CTAGCACCATCTGAAATCGGT	2368.52	3505.65	3158.78	4046.35	4802.05	2371.9	1439.99	1304.76	2800.49	3593.59	3642	4639.67	3751.03	4018.58	2119.9	3351.29	2359.7	2477.96	4836.62	4940.4	2496.2	3351.33	2561.47	747.022	666.944	814.571	1610.36	1336.98	1275.61	1589.8	567.045	664.523	705.733	579.189	563.113	1332.97	1372.25	1347.23	552.931	381.494	475.871	2002.25	1666.99	2150.88	2144.82	1291.95	816.483	965.503	559.062
mir-30a-CTTTCAGTCGGATGTTTGCAG	290.692	325.728	314.696	777.041	891.89	482.35	522.423	455.706	478.749	586.648	605.082	585.247	392.944	413.949	236.85	332.619	319.909	480.503	794.824	831.282	472.556	569.214	479.365	223.253	248.038	272.717	715.253	635.649	667.25	754.267	101.821	128.579	142.671	115.26	99.0236	1321.01	1489.48	1180.87	407.417	278.904	329.897	1309.92	1140.18	1424.73	1512.17	1297.65	807.098	948.429	41.9427
mir-365-TAATGCCCCTAAAAATCCTTA	86.9267	96.7702	93.1543	516.255	538.334	326.968	52.3944	43.3962	123.037	149.933	151.692	139.552	106.398	104.516	96.7619	145.163	126.609	297.297	422.792	448.078	250.315	278.111	235.424	286.563	271.645	344.242	172.333	179.493	169.995	172.829	138.308	152.427	170.062	126.406	110.615	900.8	989.373	921.595	489.445	369.821	369.466	475.409	428.955	549.42	544.133	1186.74	792.429	955.054	41.2674
mir-196a-TAGGTAGTTTCATGTTGTTGG	0	0	0	0	0	0	0	0	0	0	0	0	0	0	0	0	0	0	0	0	0	0	0	316.079	386.77	383.111	0	0	1.40224	0	69.2032	153.305	238.182	0	0	626.483	737.87	554.684	0	0	0	0	0	0	0	1220.95	787.54	915.548	1.20051
mir-195a-TAGCAGCACAGAAATATTGGC	995.266	459.547	517.655	632.85	711.709	362.788	5025.49	4635.04	1251.33	1690.38	1695	2186.67	1118.59	1252.79	472.322	579.674	542.05	336.277	570.372	648.747	629.034	1127.67	760.691	1875.64	1596.67	2021.92	1768.18	1577.65	1643.42	2004.7	1636.73	1590.55	2006.8	1708.01	1668.66	2667.95	2855.84	2403.08	456.34	354.467	513.377	3958.3	3811.77	4415.01	4977.12	1462.7	688.194	1008.58	387.389
mir-199a-ACAGTAGTCTGCACATTGGTT	12.3716	12.0531	19.0652	9.23598	10.904	6.6631	16.4851	15.4537	9.78976	19.8041	17.792	16.2326	16.2496	18.4676	11.685	18.1276	12.209	6.69663	10.6828	12.1502	10.4265	19.7517	18.6328	1130.39	1003.74	1175.2	1284.43	1067.51	1011.34	1189.77	862.829	880.684	1068.01	927.147	925.716	1201.07	1219.48	1065.21	281.25	208.011	296.909	2351.46	2142.1	2424.56	2746.8	1296.78	659.772	751.572	285.171
mir-191-CAACGGAATCCCAAAAGCAGC	1451.87	1983.42	1805.52	2432.87	2829.07	1642.41	1029.75	930.64	1401.74	1585.58	1737.18	2778.03	1949.2	2169	1540.44	1948.39	1546.34	1711.64	2982.4	3012.37	1787.87	2057.3	1879.11	2445.16	2298.66	2441.91	1372.46	1168.28	1188.67	1391.79	2023.88	2403.68	2282.85	2043.05	1627.19	2309.46	2489.44	2159.86	929.337	699.875	789.777	1682.06	1453.53	1742.07	1724.12	1111.86	654.557	959.132	1499.74
mir-378a-CTCCTGACTCCAGGTCCTGTG	13.1856	19.8579	14.6006	74.3682	75.2378	37.6196	43.8815	39.443	16.3954	19.8932	21.6266	27.8377	18.3367	22.4393	15.1642	18.1071	16.0784	43.0335	66.1139	63.0804	34.6422	24.631	32.6922	212.368	226.348	249.858	990.469	811.994	753.326	896.192	97.7072	112.475	116.709	129.709	114.174	299.402	324.202	260.766	137.028	82.7093	70.592	34.716	29.8836	36.3288	42.4333	1062.11	646.343	704.757	29.7126
mir-30a-GTAAACATCCTCGACTGGAAG	216.707	259.189	249.537	596.607	638.063	337.211	325.513	297.574	373.532	468.224	484.066	424.252	308.326	318.143	190.439	271.608	260.354	344.952	594.913	602.947	346.11	453.467	355.993	268.798	273.364	318.117	960.927	826.839	805.317	1022.67	165.882	156.144	196.5	167.275	156.613	1360.79	1415.41	1294.61	460.112	330.553	425.616	1159.12	1019.63	1293.09	1276.22	1097.09	634.608	811.043	49.746
mir-1a-ACATACTTCTTTATGTACCCA	0	0	0	1.44082	1.41457	0.807022	0	0	0	0	0	0	0	0	0	0	0	0	1.34469	0	0	0	0	3.7398	2.64503	3.64989	708.774	509.24	426.497	522.494	1.32235	1.65177	2.38181	1.23847	0.912661	0	0	0	0.838092	1.06128	0.66318	5.08578	2.90297	5.12876	7.07222	993.705	613.684	681.819	0
mir-1a-ACATACTTCTTTATATGCCCA	0.854618	0	1.68932	0	0	0	0	0	0	0	0	0	0	0	0	0	0	0	0	0	0	1.46962	0	3.87336	4.43042	5.25073	395.203	309.051	278.507	326.773	3.13447	3.61324	4.04909	2.06411	1.68842	0	0	1.18935	1.67618	2.47631	0	3.0957	2.04915	4.06027	10.5012	1095.02	598.038	759.557	0
mir-151-TCGAGGAGCTCACAGTCTAGT	1222.35	1072.92	1347.47	1752.7	1965.46	1146.78	638.765	566.307	1429.97	1399.06	1587.48	1842.3	1174.04	1310.91	1005.83	1252.64	1188.42	943.143	1714.82	1982.79	1924.09	2823.51	2107.96	602.441	612.126	678.369	1165.91	1020.73	1115.32	1264.74	515.718	540.747	574.376	589.097	485.582	1211.31	1363.87	1177.01	491.016	364.726	376.024	1698.65	1519.28	2026.71	2121.24	990.336	578.872	740.695	258.184
mir-19b-TGTGCAAATCCATGCAAAACT	305.832	316.539	356.084	499.962	497.399	294.812	131.037	119.138	274.873	327.77	336.209	483.925	333.685	389.271	289.629	424.32	319.621	196.219	408.338	429.476	454.337	641.167	484.262	2028.84	2023.12	2336.39	1625.9	1360.82	1310.77	1559.47	2145.39	2429.13	2324.89	2221.73	1937.86	2403.3	2696.68	2302.73	1543.66	1222.95	1917.04	2027.02	1944.81	2244.26	2511.92	1273.55	563.814	987.169	2002.75
mir-93-CAAAGTGCTGTTCGTGCAGGT	439.763	460.436	504.141	711.429	793.666	487.193	278.997	251.573	417.301	433.377	493.269	671.012	451.263	495.118	430.571	586.118	519.843	406.649	702.488	795.398	709.813	1049.78	818.989	1707.15	1668.81	1735.24	907.801	714.824	935.402	1088.48	1447.74	1826.03	1655.61	1650.71	1200.84	1398.27	1523.43	1468.4	761.613	657.213	738.857	1333.8	1181.17	1534.78	1536.6	992.149	554.231	810.789	1188.73
mir-378a-CTGGACTTGGAGTCAGAAGGC	21.7318	29.4904	25.8225	86.8921	82.3106	43.0204	33.9499	31.177	26.803	31.5087	31.4428	46.8081	29.965	36.6529	19.9563	26.332	23.6489	54.6764	86.5085	85.4607	43.9479	36.3879	39.4244	458.927	458.119	503.302	1104.5	857.878	815.672	1023.81	241.844	220.408	268.907	304.745	272.11	496.602	517.568	447.791	167.827	119.571	97.7093	33.1682	25.6143	37.8245	47.1483	908.455	516.292	636.702	23.1848
mir-142a-CATAAAGTAGAAAGCACTACT	19.4121	24.7482	28.3564	39.1237	37.663	20.0514	8.10747	7.27766	27.9436	33.2442	28.9887	32.7803	29.6071	31.3909	19.4968	29.3397	21.9906	17.0079	34.1775	36.1674	30.5759	34.8594	25.9089	317.549	144.221	227.639	288.175	238.874	267.289	386.289	672.048	1836.76	754.679	785.849	833.577	238.57	269.366	312.354	210.046	155.3	200.281	1001.01	977.959	951.812	1095.77	802.475	514.141	1114.1	6302.97
mir-149-TCTGGCTCCGTGTCTTCACTC	301.193	501.93	402.662	495.086	538.866	246.7	142.286	130.638	225.403	216.288	247.708	326.785	285.606	271.752	453.35	716.92	466.921	440.95	717.391	713.998	413.987	460.051	413.421	30.6531	32.1371	31.4403	1572.52	1269.05	1199.67	1276.76	17.5824	21.6794	25.1282	18.1642	17.66	65.3007	78.6109	39.2485	6.07613	22.2868	10.0951	33.3892	24.0775	45.0904	38.7902	623.688	512.184	557.943	12.8304
mir-199b-CCCAGTGTTTAGACTACCTGT	6.22651	7.70603	10.1359	9.75319	9.7252	6.20786	10.5396	7.90654	7.55619	6.94258	8.58925	8.35859	8.98948	7.86284	8.46832	14.4244	10.5267	4.79418	10.1972	10.9541	11.1042	17.518	14.0255	615.331	586.073	688.359	991.247	809.296	688.823	831.524	400.575	369.428	498.634	337.77	344.667	332.558	357.459	313.246	34.1522	33.8901	41.2647	1713.68	1539.6	1736.94	1955.37	1083.36	505.927	648.174	75.2569
mir-152-TCAGTGCATGACAGAACTTGG	156.273	181.536	209.355	195.839	222.354	105.968	136.509	123.99	168.517	255.54	253.383	365.67	371.342	400.46	144.355	212.683	158.909	103.588	206.41	222.669	147.405	291.808	210.28	1304.32	895.144	1259.08	1643.53	1433.25	1308.4	1675.07	1144.58	1134.87	1495.42	869.322	791.051	2478.54	2591.14	1997.22	1097.17	621.343	690.739	1891.69	1637.11	2030.78	2083.31	1078.17	502.797	752.675	299.977
mir-10a-TACCCTGTAGATCCGAATTTG	3.1743	10.3735	496.66	6.42825	6.454	5.58707	26.0452	17.071	4.13451	14.1522	8.74264	4.361	8.18445	7.13703	5.84248	13.4422	8.29152	3.93807	6.05111	10.4819	6.25593	14.3435	7.49726	1590.69	1454.77	1847.16	594.489	602.809	521.202	625.501	3845.8	5164.61	6606.09	3127.05	3049.85	18279.9	19360	14558.6	986.225	708.796	935.896	4669.19	3993.8	4778.08	4827.76	1246.34	493.997	742.225	609.783
mir-128-TCACAGTGAACCGGTCTCTTT	14344.6	18358	13349.2	17859.8	20534.1	9977.56	3780.5	3462.54	22745.3	25866.1	25867.1	16578.2	13281.4	12296.5	9058.89	9454.25	5723.17	12115.3	20483.9	23074.4	9684.93	13192.5	9680.3	46.6807	43.3785	55.1326	267.962	211.883	288.431	287.856	55.0492	55.2309	60.26	53.4192	59.2318	95.2839	84.6579	68.0903	19.7999	21.5086	14.0006	64.7883	46.2767	72.6575	93.8677	842.898	484.414	545.709	71.3554
mir-122-TGGAGTGTGACAATGGTGTTT	69.1021	37.1964	182.929	8.97739	10.963	5.77331	21.4847	9.61364	37.4959	277.303	13.1906	6.5415	5.54575	4.41528	4.7265	10.8643	4.39812	4.79418	10.6455	11.804	5.31755	6.6427	6.06922	0	0.727382	0.896463	130.093	847.532	41.2043	5.15053	1.2244	0.72265	1.42909	0.74308	0.912661	117.484	20.3399	33.0045	156346	114333	140126	810.629	20.833	10.8986	8.14379	47.9361	469.748	216.396	2.85121
mir-30e-CTTTCAGTCGGATGTTTACAG	477.61	587.436	559.164	781.809	938.129	483.158	468.103	416.353	538.77	611.749	674.103	879.76	612.358	634.289	428.077	591.214	496.41	486.838	856.456	932.041	585.633	892.356	649.458	269.333	309.469	336.559	1516.55	1235.76	1321.55	1476.48	166.47	229.338	223.177	246.042	232.135	1726.93	1932.97	1484.01	260.542	170.088	170.364	526.93	448.081	547.067	573.064	785.635	436.11	539.845	180.976
mir-20a-TAAAGTGCTTATAGTGCAGGT	191.557	194.874	226.49	251.699	293.612	176.737	71.6494	67.9243	170.085	187.984	202.614	298.147	206.981	229.293	182.955	247.853	216.301	116.145	253.586	283.484	307.479	445.767	363.438	1382.52	1312.33	1377.17	780.04	721.572	752.895	929.384	1657.74	1956.21	1860.32	1741.04	1455.61	1248.35	1434.91	1236.18	848.673	637.546	941.2	1071.99	1013.14	1192.01	1345.87	999.146	434.741	811.298	1537.7
mir-328-CTGGCCCTCTCTGCCCTTCCG	2431.52	3926.37	3297.8	2712.17	3117.19	1807.41	1798.94	1689.67	2463.46	2496.4	2934.15	4128.64	3242.52	3339.35	2872.07	3982.09	2655.67	2180.32	3515.91	3887	2188.09	3151.99	2312.78	137.638	158.503	153.68	640.359	497.543	530.046	525.354	62.2975	77.5812	74.0745	66.0515	54.3947	551.667	622.016	527.179	141.637	84.0531	70.9607	464.796	424.517	529.758	475.34	552.173	421.833	420.051	136.632
mir-181b-AACATTCATTGCTGTCGGTGG	1839.26	1527.13	1801.66	2644.23	3213.57	2090.19	1459.14	1426.51	1919.13	1913.88	2318.8	2441.95	1912.39	2128.35	1785.31	2284.51	2160.34	1266.06	2477.93	2955.06	2922.07	4961.03	3655.4	550.018	554.861	611.518	447.033	437.712	390.469	454.963	340.726	410.825	444.804	330.835	268.322	692.071	816.619	610.137	55.314	28.513	41.8542	901.951	818.465	922.964	994.397	893.946	421.443	590.058	150.964
mir-146a-TGAGAACTGAATTCCATGGGT	225.863	247.334	262.085	412.185	455.848	275.877	70.1294	63.7916	346.872	405.473	430.536	343.574	259.98	285.24	243.612	318.747	348.389	257.288	436.127	486.796	344.937	460.757	382.768	1062.31	504.342	618.562	787.296	686.933	715.358	824.085	1071.06	2022.49	1459.58	1060.29	1399.61	920.838	1086.95	1132.56	583.416	524.625	574.687	3037.97	2964.79	3170.85	3671.98	623.429	409.709	682.072	4209.28
mir-497a-CAGCAGCACACTGTGGTTTGT	951.19	446.061	452.496	630.301	579.798	309.213	3897.86	3592.37	1197.16	1527.36	1638.56	1999.73	1062.99	1262.65	441.862	541.373	489.345	287.651	506.836	558.185	592.749	929.213	617.071	1790.76	1566.26	1966.52	975.957	903.314	819.987	1114.8	1556.65	1540.63	2015.02	1649.64	1361.37	2247.47	2386.5	2150.06	426.169	343.925	471.744	2844.71	2823.73	3144.57	3601.04	852.745	408.144	635.427	312.807
mir-92a-TATTGCACTTGTCCCGGCCTG	188.016	157.678	216.595	243.165	284.418	184.808	81.7837	76.0106	139.719	173.698	198.627	248.358	182.071	220.824	195.887	260.497	246.294	104.73	226.917	276.78	333.441	538.176	442.644	1392.81	1336.8	1430.64	688.301	611.807	606.846	713.637	1769.85	2185.34	1981.32	1951.98	1527.01	1278.48	1505.83	1277.5	1105.45	843.783	1269.77	900.626	835.2	992.416	1045.19	825.278	406.775	677.483	1130.95
mir-148a-TCAGTGCACTACAGAACTTTG	376.521	694.136	658.834	1187.23	1075.7	583.725	73.1696	65.9477	221.838	300.534	241.88	586.701	497.732	433.847	366.632	727.722	366.99	715.534	1265.91	1323.27	468.96	318.379	408.576	10296.9	7878.52	9821.39	2400.25	2377.94	1944.36	2555.23	5274.87	5695.09	5949.66	5123.37	6803.04	554.983	709.56	469.347	14599	9131.71	15034.3	1097.42	970.786	1047.55	1216.21	1120.93	397.193	1034.32	2212.24
let-7e-TGAGGTAGGAGGTTGTATAGT	3177.96	5248.26	4602.67	3701.45	5325.17	2727.3	3262.34	2997.31	3842.53	4481.97	4785.59	5735.59	4478.42	4187.26	3858.59	5760.15	3805.38	3325.67	5701.82	6226.83	3129.13	5390.87	3971.87	646.451	808.054	839.281	745.572	869.575	882.332	988.332	349.542	481.026	472.433	381.531	343.344	1664.23	1943.29	1284.64	202.399	119.712	232.409	2053.32	1767.91	2061.34	2101.74	752.208	389.566	563.296	173.999
mir-99b-CACCCGTAGAACCGACCTTGC	1365.32	1800.84	1692.93	2819.9	2752.5	1566.36	2517.77	2326.14	1423.27	1499.73	1635.49	2900	1846.38	2216.66	1497.97	1870.14	1601.85	1791.14	2861.72	3055.61	1828.37	2755.01	2005.96	883.657	897.857	999.754	1112.53	929.406	930.872	1204.08	562.735	583.848	706.328	572.337	539.247	2221.23	2424.98	2007.33	330.313	228.741	313.538	2342.11	2142.22	2602.2	2601.93	704.015	370.4	580.883	204.237
mir-22-AGCTGCCAGTTGAAGAACTGT	61.7767	81.2097	71.1928	152.727	155.427	71.9494	22.8022	20.7548	76.9875	82.6434	97.2426	115.058	81.5315	93.0235	54.7486	59.9683	53.5705	89.6622	160.579	148.918	78.9029	83.4158	68.1894	88.2194	78.6239	96.7542	596.821	455.255	435.988	534.512	76.0599	65.0383	79.4335	88.509	87.5241	227.038	258.096	323.801	341.103	267.796	285.095	159.87	123.12	149.162	138.444	652.968	357.297	444.263	31.3633
let-7f-GAGGTAGTAGATTGTATAGTT	543.905	712.363	662.214	849.304	1046.7	556.472	558.502	502.876	634.435	725.633	774.106	970.395	711.466	708.744	481.447	707.1	510.542	551.445	1019.72	1059.71	624.264	813.761	669.042	482.634	484.239	537.623	855.972	774.206	808.553	935.106	356.252	410	396.216	402.336	342.568	874.139	974.252	877.295	620.501	440.36	485.376	848.883	754.77	910.996	989.255	667.478	356.124	476.126	277.242
mir-139-TCTACAGTGCACGTGTCTCCA	2116.04	3206.6	2801.61	9955.15	11373.5	5785.61	115.024	113.207	1646.54	1730.84	1815.7	2806.01	2344.79	2311.19	1797.58	2152.35	2444.35	7137.82	11074.5	10762.8	5668.5	2289.91	4731.24	796.243	457.327	600.825	774.598	685.133	763.897	821.796	173.179	211.891	197.69	179	142.101	401.462	477.713	378.957	337.541	238.858	257.315	116.531	94.0903	98.515	104.583	560.983	355.733	521.749	267.113
mir-199a-CCCAGTGTTCAGACTACCTGT	5.24981	4.14941	8.32594	3.10329	2.91757	1.48988	5.26985	7.45734	3.42167	9.61283	5.9818	6.46881	7.78194	7.86284	4.07004	5.58559	2.73981	1.76927	2.80144	2.83295	2.18958	4.87915	7.19126	617.935	511.086	635.338	907.802	681.083	596.706	747.399	585.559	549.625	681.794	585.712	621.476	561.038	574.052	500.419	186.476	131.457	189.891	866.129	753.236	872.53	945.75	670.069	348.107	395.838	202.886
mir-199b-ACAGTAGTCTGCACATTGGTT	6.18582	6.02651	9.53259	4.61799	5.45201	3.33155	8.24257	7.72686	4.89488	9.83526	8.896	8.11631	8.12483	9.23379	5.84248	9.06379	6.10449	3.34832	5.34141	6.07511	5.21328	9.87587	9.31638	565.009	501.607	587.377	641.568	533.082	505.238	594.599	431.316	440.265	533.765	463.489	462.766	600.39	609.463	532.531	140.625	103.935	148.381	1175.62	1070.8	1212.17	1372.22	648.131	329.788	375.531	142.585
mir-17-CAAAGTGCTTACAGTGCAGGT	163.354	161.234	181.24	213.684	239.24	144.395	55.3333	49.7754	129.739	150.467	163.963	266.166	179.521	191.068	155.712	208.324	180.395	103.646	197.67	228.053	233.659	344.068	284.794	1120.4	1040.82	1077.17	502.232	433.663	510.846	623.787	1228.18	1449.99	1387.76	1271	1016.57	1059.37	1191.53	1025.22	570.32	391.399	587.139	813.724	753.747	891.55	1008.54	644.16	315.837	500.85	948.474
mir-140-TACCACAGGGTAGAACCACGG	247.474	327.654	320.85	378.602	390.335	211.129	272.511	243.666	229.395	277.97	300.163	397.361	338.38	356.248	301.248	432.668	353.219	200.214	380.771	406.152	330.703	518.894	408.882	275.676	254.849	310.498	1045.15	950.998	835.303	1107.94	297.432	378.874	321.545	381.695	329.517	799.176	847.954	843.844	276.255	213.175	239.556	727.931	626.187	756.919	751.371	541.808	292.37	399.15	586.898
mir-9-TCTTTGGTTATCTAGCTGTAT	62603.7	81934.6	71809.3	79908.9	83072.6	41817.8	64704.5	58181.6	70469.3	82447.3	83734.1	119106	88335.3	87260.2	47297.1	65842.5	48023	46523.3	83387.6	92413.9	56983.4	67873	52311.2	235.34	225.754	288.661	201.359	171.396	258.443	148.793	149.034	164.609	211.386	145.313	138.405	833.629	911.584	636.898	33.4188	20.1642	9.87406	61.2504	31.4204	64.9643	137.587	301.091	274.964	236.533	19.3582
mir-101b-GTACAGTACTGTGATAGCTGA	339.895	444.727	476.147	1194.44	1116.1	577.579	285.179	257.233	328.623	391.455	399.248	911.158	565.309	631.689	349.826	645.719	498.501	559.036	1023.2	1053.29	718.963	783.779	621.101	177.774	165.645	193.252	213.021	164.648	195.882	194.003	170.387	201.774	188.64	190.229	164.826	392.669	407.21	343.276	1819.81	1280.04	1243.02	414.822	366.115	447.269	439.978	564.352	273.791	356.075	162.444
mir-30c-GTAAACATCCTACACTCTCAG	211.335	241.999	239.642	444.99	459.206	261.91	262.377	229.021	290.842	336.449	342.65	356.44	262.305	281.732	199.366	288.672	258.552	262.139	443.189	470.174	294.42	425.663	307.797	163.082	166.637	199.591	632.067	554.224	516.025	687.312	111.127	114.849	120.401	119.388	106.371	996.804	1064	916.988	238.646	166.62	206.398	437.818	352.624	476.759	435.476	458.631	273.205	332.624	56.4238
mir-34a-TGGCAGTGTCTTAGCTGGTTG	1155.44	243.629	2404.02	319.639	349.576	204.922	1398.13	1381.5	2117.87	2439.25	2691.81	379.116	185.917	226.147	490.177	868.099	1098.59	113.177	181.198	250.528	1230.47	3112.43	1365.06	460.663	387.431	474.679	1034.52	867.326	898.296	913.362	159.32	166.57	196.381	271.472	212.924	1329.51	1231.8	1258.63	294.065	123.533	118.562	1031.75	801.562	983.014	1069.41	414.324	272.227	373.915	282.87
mir-185-TGGAGAGAAAGGCAGTTCCTG	713.485	1063.43	1058.11	867.592	987.726	510.41	376.388	347.709	851.283	861.415	892.056	1236.86	945.866	879.186	931.841	1553.9	1058.22	627.238	1025.21	1122.79	871.526	1547.69	1023.66	196.139	223.439	244.863	893.289	761.61	1013.93	1006.07	232.098	264.231	273.075	268.086	209.182	732.578	849.603	908.812	337.96	231.925	198.292	360.206	305.495	430.174	408.905	435.311	271.248	311.723	124.327
mir-190a-TGATATGTTTGATATATTAGG	576.746	805.577	952.778	2264.18	2138.39	1098.6	326.73	291.285	641.848	643.524	711.988	936.451	797.739	824.206	585.823	957.652	766.928	1183.42	2193.08	2156.92	1500.41	1573.73	1182.63	379.323	318.792	408.019	531.258	449.408	413.984	400.023	252.814	211.942	277.839	238.446	229.489	3904.48	3911.58	3223.14	182.808	187.704	165.207	309.57	249.484	359.228	340.967	602.182	268.316	380.288	9.2289
mir-10b-ACCCTGTAGAACCGAATTTGT	0	1.03736	58.5228	0	0	0	2.43223	5.1213	0	1.06809	0	0	0	0	0	0	0	0	0	0	0	1.76355	0	104.047	106.528	118.782	58.8269	40.9372	39.2627	34.9092	135.664	128.993	183.637	103.618	68.7692	1691.04	1891.47	1438.37	4.39998	2.97158	3.61066	22.3332	17.7593	26.0712	37.29	426.244	261.275	374.171	5.70241
mir-342-TCTCACACAGAAATCGCACCC	1406.95	2475.12	1966.24	3171.56	3300.64	1866.27	680.722	598.922	1471.89	1494.26	1626.75	2051.84	1397.98	1469.32	2068.5	2896.58	2295.74	2188.43	3543.37	3695.03	2076.81	2631.1	2112.95	251.903	171.861	231.48	421.376	362.135	364.366	438.94	365.018	601.399	418.485	461.039	457.655	231.939	251.912	235.789	186.265	118.651	156.732	456.613	454.059	470.991	458.194	323.633	258.343	402.973	1947.9
mir-140-ACCACAGGGTAGAACCACGGA	306.32	429.611	407.85	449.535	456.024	249.059	312.339	278.527	270.311	333.779	344.183	504.35	438.294	451.69	382.715	553.465	423.589	264.593	458.651	508.798	400.849	615.125	472.684	349.939	339.291	388.874	1127.3	945.602	883.411	1212.66	349.053	389.3	366.562	424.547	345.853	1081.86	1187.95	1131.81	336.074	237.089	236.609	842.469	732.06	876.59	870.742	486.358	256.777	347.663	390.24
mir-29a-AGCACCATCTGAAATCGGTTA	324.389	507.265	425.106	720.408	800.827	430.143	239.879	220.665	375.386	484.378	481.918	613.883	496.076	505.762	297.506	469.866	321.856	441.806	842	863.767	422.432	442.65	381.289	123.613	123.192	141.962	488.237	439.511	420.456	508.757	97.1197	129.251	120.758	105.848	86.7944	300.267	325.026	308.042	172.019	119.854	154.153	356.888	307.373	380.811	364.54	355.246	254.039	288.786	168.221
mir-451a-AACCGTTACCATTACTGAGTT	27.8361	36.6037	30.0457	43.4461	57.0252	25.1418	27.0586	19.7664	36.0701	56.7422	44.3266	40.7753	32.6036	30.1208	28.8185	42.3523	30.21	24.5416	50.2017	42.0221	33.8602	71.894	43.4025	22.4388	33.9225	22.988	2129.43	1045.92	2240.34	2962.14	21.8923	44.3396	31.5591	37.732	55.1248	651.997	758.897	1242.43	411.607	814.847	594.73	1138.77	911.19	1664.71	1754.98	353.691	249.345	353.782	590.499
mir-322-CAGCAGCAATTCATGTTTTGG	113.908	155.751	131.767	109.834	101.142	48.6075	20.0659	20.1258	104.218	90.3869	101.077	115.348	103.58	83.1042	110.942	110.792	79.2385	63.9223	103.093	117.945	100.408	102.639	87.672	145.585	87.6828	140.681	911.946	748.112	739.304	867.005	119.6	135.341	129.809	134.497	165.1	831.899	940.857	776.944	98.5801	75.8458	93.9509	595.036	697.396	676.142	779.017	516.935	248.954	414.953	136.708
mir-24-GGCTCAGTTCAGCAGGAACAG	141.623	112.923	125.613	219.891	260.812	149.734	88.1684	82.9294	201.166	243.658	260.592	225.029	178.716	187.619	95.4488	119.876	101.301	121.909	228.374	235.136	137.63	175.708	158.156	334.979	328.778	373.571	1014.57	859.229	808.337	991.192	176.509	184.688	233.656	154.231	124.943	373.353	394.017	329.152	110.942	79.0301	89.0138	809.744	694.491	862.701	834.311	527.817	247.195	302.039	123.652
let-7a-GAGGTAGTAGGTTGTATAGTT	413.88	520.454	514.519	595.5	788.007	422.445	556.677	510.153	506.408	595.193	628.396	655.531	483.688	479.028	355.21	486.377	386.963	440.208	727.813	777.646	480.69	653.453	542.71	261.051	288.507	303.71	581.532	598.76	646.972	702.76	163.041	213.749	195.428	189.238	163.321	492.134	573.639	471.726	328.217	223.081	243.02	694.982	593.23	704.563	765.516	469.515	245.043	314.273	175.199
mir-148b-TCAGTGCATCACAGAACTTTG	470.896	685.393	638.442	1105.77	1097.27	540.084	298.961	270.979	507.405	539.919	576.247	896.185	652.788	669.37	468.514	699.181	499.8	631.462	1099.73	1134.79	667.038	796.124	630.484	558.165	496.208	599.351	542.399	455.707	520.77	653.545	513.172	498.937	559.607	560.943	574.293	720.902	811.12	797.757	495.102	322.274	370.94	545.282	506.824	605.407	734.225	471.848	243.869	385.897	274.241
mir-15b-TAGCAGCACATCATGGTTTAC	130.391	113.516	155.538	206.924	209.092	119.005	115.531	97.1247	118.047	136.716	133.9	216.888	148.975	167.66	124.793	168.366	161.793	83.4416	160.354	186.031	254.929	366.289	283.723	1503.86	1412.65	1499.72	523.742	389.126	518.182	603.757	1439.41	1827.79	1539.61	1680.27	1373.28	728.974	833.797	928.581	508.826	490.309	551.769	1111.13	1066.41	1233.89	1332.15	468.74	236.829	461.087	1204.86
mir-16-AGCAGCACGTAAATATTGGCG	211.213	197.986	185.222	406.752	504.118	274.201	314.164	303.595	271.453	334.712	353.693	373.448	220.935	258.083	141.139	185.368	163.74	226.354	424.25	455.35	295.671	410.26	345.334	393.281	369.975	418.97	624.033	510.139	586.136	782.309	387.009	451.655	415.031	407.043	383.181	551.957	653.9	693.392	512.073	354.184	399.015	654.518	579.397	728.924	765.086	501.645	235.264	369.583	477.577
mir-140-CAGTGGTTTTACCCTATGGTA	214.022	277.862	276.204	313.654	336.492	168.295	221.84	196.047	215.708	260.347	277.771	358.983	312.53	334.05	231.598	352.26	270.809	152.044	308.83	327.488	298.017	457.582	327.891	211.699	185.946	220.851	875.406	745.414	684.293	860.139	227.788	256.023	243.779	262.885	244.867	645.078	683.86	665.144	241.265	174.333	201.313	581.99	506.482	623.787	671.861	431.166	231.158	322.938	431.733
mir-124-TAAGGCACGCGGTGAATGCCA	65167	79257.5	61776.1	137057	122582	60433.6	82621.3	73051.5	90905.7	99411	107566	105452	82314.2	89710.8	45320	68168.3	48145.8	60117.5	118914	121524	65605	96409.9	55142	70.3216	76.7062	91.8236	34.2078	15.745	67.0919	12.5902	45.6947	50.637	67.2864	53.9971	39.2444	148.332	87.8189	89.9445	35.4094	24.0557	8.54767	28.0822	8.02585	12.1808	59.578	160.133	229.203	153.696	7.5782
mir-25-CATTGCACTTGTCTCGGTCTG	113.787	100.178	116.201	186.087	191.587	126.02	139.245	126.145	111.347	156.341	147.551	227.791	124.198	142.741	107.002	133.317	126.464	115.175	189.041	212	194.873	234.493	207.271	572.589	569.012	605.82	534.107	376.982	513.22	582.011	510.575	671.961	595.811	640.039	463.495	517.072	579.824	578.173	244.408	271.829	287.895	583.98	527.827	687.895	685.578	386.857	228.42	314.528	418.077
mir-338-TCCAGCATCAGTGATTTTGTT	3534.34	2441.33	4014.67	6272.54	6631.08	3935.84	2042.97	1847.89	2973.29	2949.67	3587.24	3068.82	2777.43	3431.1	3713.85	5366.59	5247.03	1741.31	4492.94	4913.66	8936.74	13510.8	9130.79	131.026	115.257	155.601	189.179	151.152	160.934	147.076	115.094	96.0603	132.429	125.085	125.491	171.397	135.782	145.695	88.8378	66.4358	83.8559	363.081	289.613	425.688	390.901	510.974	228.42	542.14	70.3799
mir-361-TTATCAGAATCTCCAGGGGTA	435.245	647.307	550.235	793.335	928.05	536.049	469.522	434.412	387.219	435.246	484.065	741.661	530.29	550.943	516.435	758.29	545.655	588.6	981.064	1027.42	614.646	752.27	641.857	200.413	194.938	215.473	206.024	187.59	203.002	222.618	205.014	234.448	225.438	203.604	166.059	310.934	344.266	282.62	184.066	122.401	126.741	286.793	265.707	309.008	298.106	373.383	216.491	293.118	175.124
mir-221-AGCTACATTGTCTGCTGGGTT	3049.04	4083.01	4333.35	2814.57	3816.96	1880.55	666.939	647.53	2728.07	2708	3071.73	6850.56	5312.52	5085.57	2113.79	2336.56	2128.33	3518.47	5802.68	6231.46	2629.05	1835.56	2147.79	495.658	516.64	491.071	676.121	615.405	576.86	628.363	207.12	256.282	254.498	201.044	188.099	2070.45	2211	1951.13	690.166	444.958	409.332	1600.03	1531.58	1819.63	1924.93	420.025	216.1	304.588	341.244
mir-98-TGAGGTAGTAAGTTGTATTGT	543.294	806.466	796.272	760.749	879.069	453.422	377.604	353.46	556.306	637.383	626.402	1007.61	736.467	735.78	553.263	814.207	596.847	486.838	819.477	876.42	604.01	895.942	661.799	327.834	303.914	330.348	422.414	369.332	454.541	493.304	280.045	277.961	292.725	329.762	286.576	566.804	645.515	604.784	244.932	160.748	167.564	544.178	456.621	546.214	605.21	440.237	215.317	337.977	249.48
mir-30e-GTAAACATCCTTGACTGGAAG	255.287	345.883	316.264	431.357	491.3	246.141	227.92	200.809	280.577	341.12	359.215	421.781	342.674	341.49	253.065	383.258	294.674	251.352	472.323	491.045	324.526	510.253	340.539	246.359	237.854	277.456	1048.52	820.54	801.649	1034.68	199.235	199.812	224.367	217.722	219.906	1183.48	1195.79	1073.69	199.99	156.644	169.628	321.509	257.851	331.019	319.75	397.481	212.383	254.884	118.175
mir-186-CAAAGAATTCTCCTTTTGGGC	507.4	699.026	613.343	874.464	902.498	492.532	351.254	334.77	505.695	541.121	584.222	899.383	637.091	691.931	534.357	682.977	533.47	496.313	854.215	884.731	631.848	867.489	625.18	329.302	294.656	334.958	510.265	385.528	382.489	481.289	277.302	273.677	298.918	256.693	220.134	502.368	539.557	529.112	235.818	164.215	148.332	447.328	362.871	502.405	530.416	368.72	208.864	286.49	185.853
mir-196b-TAGGTAGTTTCCTGTTGTTGG	0	0	0.844662	0	0	0	0	0	0	0	0	0	0	0	0	0	0	0	0	0	0	0	0	708.158	769.769	993.09	1.81404	0	4.09884	0	1.76314	1.44529	7.50272	0	6.06918	778.851	936.046	713.908	0.628569	0	0.589494	0	0	4.06027	4.71483	409.66	201.041	275.785	2.47605
mir-1a-GAATGTAAAGAAGTATGTATT	0	0	0	0	0	0	0	0	0	0	0	0	0	0	0	0	0	0	0	0	0	0	0	0	0	0	323.159	277.112	278.722	303.88	0	0	0	0	0	0	0	0	0	0.919775	0	0	0	0	0	404.219	197.129	246.729	0
mir-142a-CCCATAAAGTAGAAAGCACTA	14.4065	15.8567	16.0486	21.7231	23.7826	13.8436	4.56044	4.40252	17.1084	21.8958	19.3258	20.9328	16.5925	17.9031	14.7703	19.703	18.3134	14.6108	23.7562	25.1189	18.3768	21.4565	21.0638	126.685	57.794	92.3997	127.242	103.917	111.316	131.625	229.159	589.061	259.738	272.628	282.971	109.844	103.349	112.988	81.0852	56.5306	76.1923	401.776	352.966	358.799	377.184	287.359	193.414	380.033	2080.03
mir-106b-TAAAGTGCTGACAGTGCAGAT	252.967	283.197	299.613	525.454	553.895	289.658	198.328	182.75	264.894	303.738	319.797	494.828	302.154	337.618	226.609	334.215	268.069	267.732	457.194	491.611	448.237	582.971	455.548	1057.97	963.781	1113.79	551.211	404.871	576.428	691.315	1037.96	1241.4	1177.33	1058.39	932.011	873.994	971.779	954.746	456.341	417.86	433.279	955.242	873.28	1104.82	1157.92	448.267	192.24	349.191	593.202
let-7c-GAGGTAGTAGGTTGTATGGTT	596.402	607.591	657.869	579.429	788.625	434.116	808.413	739.532	661.238	761.548	832.237	1530.72	931.865	1005.84	443.897	572.861	449.545	427.31	769.835	836.854	541.529	769.436	650.528	351.141	434.843	460.912	517.522	579.868	604.904	688.455	185.032	243.946	231.275	240.263	195.584	647.529	780.337	583.375	251.951	183.389	183.923	907.92	792.168	939.632	1021.61	424.687	191.262	316.312	108.496
mir-26b-TCAAGTAATTCAGGATAGGTT	108.659	120.629	126.699	167.023	207.413	121.86	193.262	171.519	110.206	148.33	139.729	161.721	123.483	127.801	108.71	172.723	131.871	88.8065	187.136	194.152	156.32	278.289	201.407	290.903	258.023	289.431	381.728	364.385	336.968	437.223	243.754	272.284	257.236	276.756	226.705	544.028	590.268	567.172	397.464	272.253	356.203	568.722	497.944	590.876	641.645	361.204	189.502	267.119	209.939
mir-133a-ATTTGGTCCCCTTCAACCAGC	0	0	0	0	0	0	0	0	0	0	0	0	0	0	0	0	0	0	0	0	0	0	0	0	0	0	46.3878	35.5387	37.7526	34.3369	0	0	0	0	0	0	0	0	0	0	0	0	0	0	0	256.782	185.787	217.162	0
mir-133b-TTGGTCCCCTTCAACCAGCTA	0	0	0	0	0	0	1.82418	1.79694	0	0	0	0	0	0	0	0	0	0	0	0	0	0	0	0	0	0	110.916	89.0719	81.7614	101.294	0	0	0	0	0	0	0	0	0	0	0	1.76897	0	0	4.07188	373.903	182.462	212.064	0
mir-320-AAAAGCTGGGTTGAGAGGGCG	193.144	222.882	254.484	381.705	553.453	380.293	654.473	604.762	171.939	205.474	223.934	357.893	224.245	230.441	219.651	331.882	285.373	322.238	536.643	551.293	392.716	451.821	480.691	233.938	306.361	291.735	403.755	424.215	482.37	539.089	106.621	146.284	132.191	146.634	103.04	308.773	366.255	271.767	108.009	64.738	66.0236	496.195	436.64	526.126	541.775	372.606	181.679	262.787	87.3367
let-7d-GAGGTAGTAGGTTGCATAGTT	191.068	255.781	241.452	275.972	357.445	197.72	213.124	207.009	221.838	264.485	282.065	357.457	273.799	255.422	181.97	255.096	200.871	210.031	366.652	381.126	220.991	309.444	250.266	125.484	133.971	133.382	282.731	281.161	300.511	334.214	78.3122	93.5317	87.0554	92.5549	76.2074	200.659	241.33	183.458	120.475	66.6482	77.3717	254.51	220.967	264.988	286.96	290.986	172.293	195.752	60.1006
let-7g-GAGGTAGTAGTTTGTACAGTT	383.969	469.772	431.38	511.49	600.576	320.512	556.981	499.551	483.738	579.037	624.255	632.781	446.522	458.707	328.163	478.519	337.934	305.4	557.486	593.031	362.844	653.395	421.173	243.688	245.723	261.576	369.807	336.044	361.13	400.023	186.697	214.626	210.552	226.557	190.518	487.665	559.485	529.41	332.932	236.099	242.799	366.177	346.648	407.524	468.266	341.514	170.924	250.041	188.855
mir-301a-CAGTGCAATAGTATTGTCAAA	592.007	1049.36	864.448	1092.25	1193.1	602.038	553.637	511.95	492.293	589.985	602.628	1190.84	842.06	898.298	820.378	1334.09	922.232	654.462	1228.04	1262.65	847.057	1368.69	964.596	419.124	352.979	415.576	527.889	415.218	442.245	540.232	432.9	380.165	449.926	369.558	328.376	765.877	730.311	662.319	104.447	88.44	100.509	610.071	563.345	659.902	686.649	308.346	170.337	235.769	257.134
mir-133a-GCTGGTAAAATGGAACCAAAT	0	0	0	0	0	0	0	0	0	0	0	0	0	0	0	0	0	0	0	0	0	0	0	0	0	0	112.989	108.416	107.649	119.034	0	0	0	0	0	0	0	0	0	0	0	0	0	0	0	269.997	170.141	180.459	0
mir-29a-ACTGATTTCTTTTGGTGTTCA	448.187	665.387	572.679	825.143	971.194	496.38	252.648	224.888	491.437	599.732	624.101	862.169	711.646	736.083	431.884	669.595	480.187	499.45	981.736	1003.05	554.119	670.501	530.113	175.102	158.57	184.416	256.3	201.086	199.334	203.732	145.704	163.422	172.682	128.718	112.759	298.971	303.449	300.31	143.523	99.0529	123.72	322.394	279.197	342.132	343.967	248.749	167.404	198.811	91.8386
mir-29b-CTAGCACCATTTGAAATCAGT	341.238	515.712	497.988	711.208	829.56	417.292	199.241	177.539	459.073	542.723	590.511	636.125	526.533	540.842	360.33	641.054	444.498	393.294	771.629	765.18	457.387	656.216	481.712	144.183	116.844	146.445	258.891	216.831	232.556	230.057	82.1819	81.9688	107.062	78.5189	71.4158	289.889	275.688	408.988	75.3233	54.3374	55.0441	169.379	131.829	180.788	168.662	207.551	159.972	158.793	32.4137
mir-484-TCAGGCTCAGTCCCCTCCCGA	348.806	360.702	354.154	1270.46	1182.05	614.453	1084.98	981.58	368.542	391.321	456.304	679.08	401.977	504.976	308.404	430.214	390.999	654.519	1071.94	1096.07	679.55	719.234	627.731	479.095	461.36	463.537	371.879	269.915	300.079	351.381	356.643	392.863	373.945	370.385	301.589	774.815	829.537	746.17	163.952	120.208	122.542	580	496.749	617.162	615.712	284.767	151.758	235.513	286.921
let-7d-CTATACGACCTGCTGCCTTTC	328.785	369.148	368.271	622.765	686.865	402.021	433.748	411.591	354.001	401.334	424.861	589.243	421.611	468.989	337.157	415.052	388.26	391.467	674.811	700.401	485.851	645.869	525.064	220.715	226.415	239.741	390.021	280.712	299.216	353.668	130.668	157.176	150.293	152.414	126.495	401.895	478.812	398.581	197.999	123.533	113.405	397.133	358.091	439.578	418.975	239.422	151.367	185.047	99.717
mir-125b-CCCTGAGACCCTAACTTGTGA	984.523	1153.68	1113.62	1160.85	1260.3	706.891	554.245	446.721	926.56	1136.84	1193.29	1914.62	1413.59	1441.31	986.851	1317.83	981.427	776.366	1353.54	1501.46	886.466	1474.45	1113.12	119.339	121.87	136.264	634.139	489.446	501.57	582.581	58.7223	73.6067	87.77	49.5387	43.6252	300.123	364.331	252.44	74.9043	74.1479	70.4445	358.879	330.938	434.021	404.616	289.689	150.194	182.752	38.2662
mir-486a-CGGGGCAGCTCAGTACAGGAT	7.81365	10.6699	10.8599	5.76325	6.98447	3.84887	31.315	30.6379	6.5582	6.94257	9.0494	7.12298	6.26133	4.71771	8.46832	10.7415	7.57055	4.85125	7.28373	8.68772	6.80333	10.2874	7.34427	4.40762	4.89331	5.05863	267.184	253.719	266.857	282.707	2.74266	3.35514	5.00182	3.46771	2.82925	4.4687	6.73415	6.6901	1.99047	5.30637	2.94748	15.4784	14.0026	20.9425	20.1451	297.463	148.433	203.907	7.87833
mir-143-GGTGCAGTGCTGCATCTCTGG	6.22651	8.447	8.32592	11.3048	14.9414	5.71123	7.29668	5.57053	7.98389	15.6208	17.792	9.44883	9.21311	8.10479	6.69586	12.5829	10.7429	6.79175	13.8951	11.1429	8.5237	15.9895	9.43534	732.934	658.943	826.222	191.253	176.344	146.696	161.383	498.381	493.672	713.235	395.319	348.044	119.213	113.106	100.5	21.3714	17.122	23.6535	230.85	187.157	229.084	214.095	144.327	145.11	150.127	46.4446
mir-223-TGTCAGTTTGTCAAATACCCC	5.61607	5.63134	7.23995	3.43579	6.98447	3.22808	4.25641	5.21115	5.41765	15.2203	9.50953	6.10541	5.8141	6.5322	5.51425	7.18147	5.55172	3.76685	5.93903	8.12113	4.14455	8.17111	7.44627	122.412	99.7836	109.881	238.158	193.438	185.095	219.184	86.9815	111.649	102.895	143.497	179.84	87.644	98.4013	94.5534	95.6471	47.9696	58.7287	477.621	480.868	479.54	540.276	232.684	142.567	231.435	533.327
mir-199a-TACAGTAGTCTGCACATTGGT	6.83696	4.44578	7.32038	3.10329	4.7742	2.6073	6.35082	6.16953	5.13251	9.16777	6.85096	8.28589	7.09619	7.33865	4.28886	6.05617	3.94149	2.62538	4.10878	5.35114	3.3365	7.21095	5.5082	277.636	242.703	281.405	277.981	235.125	221.913	248.37	215.103	208.536	257.554	230.904	222.127	241.022	236.107	203.577	48.2949	35.8004	53.3006	473.494	439.201	491.933	575.208	285.2	142.241	172.472	57.4243
mir-193b-AACTGGCCCACAAAGTCCCGC	31.621	32.0097	29.6838	589.848	656.275	365.643	14.7961	14.106	56.3149	59.0119	76.5364	28.1285	15.1167	17.9031	34.5297	72.1831	56.815	323.721	509.974	503.038	201.206	123.919	160.299	25.5108	23.6069	29.6475	51.3116	60.7308	45.0874	57.2282	10.5788	12.4915	12.6237	10.0728	7.30128	78.8509	83.1461	52.3314	9.21898	3.74985	3.53697	32.2836	23.736	26.926	27.8603	238.903	141.394	178.419	5.17719
mir-10a-ACCCTGTAGATCCGAATTTGT	0.976705	3.70482	139.851	2.65995	2.03345	1.98651	7.09402	3.05481	0	4.40586	2.30069	0	2.37036	2.11692	0.853398	2.94625	2.88401	1.19855	1.34469	2.26637	1.40758	4.23251	2.39709	456.99	418.047	517.965	141.496	156.101	152.952	166.534	1148.05	1683.98	2183.53	896.73	895.049	5340.39	5850.87	4342.02	322.665	249.33	304.106	1379.13	1159.14	1459.56	1442.95	346.436	140.416	217.162	180.451
mir-21a-AGCTTATCAGACTGATGTTGA	64.4627	46.2363	70.3481	146.409	151.359	83.6199	47.1245	38.4546	60.5921	71.9625	77.7635	69.9941	57.7384	69.6163	57.5057	94.7097	84.6457	48.6266	103.653	108.88	143.261	231.495	162.033	1481.56	1187.88	1316.65	131.13	106.616	131.811	128.191	1682.76	1819.53	1940.7	972.113	1073.7	379.84	409.959	505.177	589.806	818.883	876.137	496.856	488.382	496.849	546.703	224.135	140.22	230.161	441.336
mir-146b-TGAGAACTGAATTCCATAGGC	331.348	476.292	432.103	647.368	728.418	391.343	282.95	256.964	427.708	433.51	482.071	480.655	388.65	368.042	376.807	566.416	398.282	374.346	677.388	721.364	371.68	516.132	388.379	330.972	244.797	263.305	62.9733	63.43	54.7952	70.3906	143.892	146.027	163.512	156.624	141.874	345.243	438.819	119.975	42.7427	24.1264	28.959	889.566	988.033	817.609	848.024	328.816	137.677	242.141	155.316
mir-130a-CAGTGCAATGTTAAAAGGGCA	191.191	326.025	285.133	110.167	124.394	58.7885	283.355	230.099	93.5253	134.979	132.367	291.824	312.933	267.639	254.706	314.696	194.022	70.8855	141.864	142.78	131.609	195.166	201.049	541.202	508.441	633.737	713.957	591.563	489.49	626.647	418.794	399.469	530.55	387.97	340.788	1467.89	1536.9	1372.06	1194.38	680.915	858.744	1249.33	1075.12	1335.83	1396.02	373.644	137.287	287.001	164.845
mir-142a-AGTGTTTCCTACTTTATGGAT	9.88915	11.7073	10.0152	17.6223	16.9749	8.44266	4.05371	5.12129	11.6907	16.4218	17.9454	12.9376	14.2222	14.5765	8.00881	13.3195	7.93104	6.67761	12.8866	13.126	15.7962	18.7524	11.0674	197.876	85.8977	138.888	126.724	95.8199	118.867	163.672	379.026	947.55	431.467	509.918	539.794	152.224	142.791	181.227	132.523	111.647	131.605	433.176	446.886	426.97	448.765	243.05	135.135	311.469	2084.83
mir-23b-TCACATTGCCAGGGATTACCA	189.237	135.004	154.211	278.631	327.651	217.585	92.3231	84.4565	226.686	268.09	288.354	338.705	252.108	275.804	133.786	158.484	149.969	157.808	286.195	291.133	241.088	267.589	245.217	353.945	345.64	381.318	360.477	296.008	317.554	349.665	160.935	185.824	195.071	154.725	112.668	467.628	487.47	414.935	149.809	110.514	110.899	290.553	264	334.652	288.032	234.239	134.548	120.561	27.3115
mir-99a-ACCCGTAGATCCGATCTTGTG	188.139	241.554	213.216	251.034	246.579	133.096	167.723	127.763	161.531	184.245	194.793	506.967	353.05	394.776	179.476	223.179	167.777	126.874	242.829	278.291	178.45	282.873	225.581	36.9305	33.2613	38.7402	639.581	524.534	488.627	613.485	21.9413	21.3181	32.0355	18.7422	17.7513	264.661	309.084	229.396	82.7617	87.6617	89.5295	231.292	197.402	240.839	226.741	298.241	131.81	197.027	15.6066
mir-30a-TTTCAGTCGGATGTTTGCAGC	35.4057	41.6422	44.6462	82.348	89.4719	49.725	54.5225	55.7952	58.5961	71.829	75.3094	59.9637	44.2319	41.9754	27.3743	39.222	35.978	49.1404	84.1552	83.4776	55.365	70.3656	55.8469	42.1395	53.2974	54.4283	201.878	164.199	170.858	181.413	25.6144	27.2541	30.7255	29.0626	21.9952	276.915	308.672	241.736	100.047	68.3461	79.4344	193.924	184.253	217.758	221.383	241.494	130.442	155.48	7.50317
mir-378a-TCCTGACTCCAGGTCCTGTGT	1.0988	3.11206	2.53398	7.86906	10.0789	3.72471	4.86446	3.68374	2.85139	2.00267	3.0676	3.77953	1.83367	1.81451	1.77244	2.33244	2.30721	5.36491	8.51637	7.08238	3.98815	2.41018	4.38616	22.4388	27.31	27.3422	116.358	102.118	117.141	113.884	14.35	14.4013	16.3155	17.7514	15.059	30.7043	35.7322	25.4223	16.3427	11.1788	8.84244	3.98018	3.41526	5.12876	4.28619	194.595	128.486	142.226	3.75159
mir-126a-CTCGTACCGTGAGTAATAATG	41.7543	49.4964	47.9042	66.7208	68.7838	33.212	25.7411	23.7197	50.1845	66.7557	67.1802	54.6578	46.2892	45.8465	32.7573	52.173	43.5486	31.6187	60.8473	57.0368	40.7418	79.0657	44.6266	42.5401	42.8495	53.724	685.969	516.886	547.521	678.154	55.1471	51.4113	62.2845	64.5653	77.4393	234.102	241.33	234.6	142.057	93.2511	120.331	946.396	835.03	1004.81	1128.56	207.291	126.139	165.42	50.9463
let-7i-GAGGTAGTAGTTTGTGCTGTT	189.237	252.521	226.49	341.251	392.279	203.929	226.906	211.77	228.966	270.894	281.298	456.452	265.436	302.477	165.362	238.155	172.968	225.44	410.915	429.381	246.562	284.696	242.717	143.982	122.796	141.193	259.149	208.284	246.795	267.256	113.331	131.161	125.045	115.095	104.226	159.864	178.386	154.765	51.333	42.7341	44.4333	341.411	328.035	379.102	426.691	254.19	126.139	170.773	135.582
mir-155-TTAATGCTAATTGTGATAGGG	4.15101	5.48314	7.48127	4.10078	7.33811	4.3455	7.39803	6.28932	4.98992	10.1468	8.74264	7.63175	6.75329	6.65317	5.12037	9.51392	7.93104	2.51124	6.94755	7.36568	8.60191	14.6962	13.5155	93.2279	70.8868	65.1859	210.688	181.742	214.435	239.786	78.117	333.606	129.214	56.8043	73.0128	107.681	145.54	113.583	19.9046	8.41948	21.1482	122.501	115.094	99.5834	111.013	195.89	124.183	178.42	634.991
mir-204-TTCCCTTTGTCATCCTATGCC	984.401	1752.83	1951.77	818.382	910.634	535.366	4046.73	3196.41	731.809	1036.04	1092.06	2765.67	1540.38	1888.77	1549.83	2461.03	1958.82	609.374	1066.34	1127.99	1530.83	3234.94	6465.4	25.9782	21.6231	28.6869	265.887	201.986	244.852	275.839	17.4844	16.5693	22.8654	20.9714	14.6482	324.053	335.608	208.582	2.72379	1.41504	1.10531	11.4983	7.34279	12.3945	24.217	162.206	122.815	113.934	36.9156
mir-374b-ATATAATACAACCTGCTAAGT	143.942	236.073	217.802	185.976	190.791	97.4631	170.459	169.092	94.8089	106.809	100.77	290.152	219.013	207.579	151.313	195.373	137.063	151.93	241.708	248.638	179.701	158.366	150.506	363.094	297.169	350.454	380.691	302.305	239.46	292.435	411.546	460.998	416.819	428.839	446.794	684.576	735.947	535.208	316.589	188.2	183.038	624.444	524.925	525.912	554.848	289.172	118.708	178.419	491.083
mir-214-ACAGCAGGCACAGACAGGCAG	0.854618	0	1.80998	0	0	0	1.52015	1.97665	0	0	1.53379	0	1.16282	1.57257	0	0	0	0	0	0	0.860191	0	2.24408	266.862	223.505	244.287	288.951	227.177	228.889	266.11	180.379	193.669	224.843	205.42	186.502	246.788	253.837	213.488	74.7996	45.635	66.8342	356.889	309.252	368.416	335.823	198.482	115.97	116.483	47.9453
mir-29c-TGACCGATTTCTCCTGGTGTT	110.856	126.556	121.269	205.482	239.593	114.846	90.9045	85.4448	142.855	167.557	182.982	178.8	147.275	151.269	89.5406	147.067	111.323	109.752	209.099	225.975	133.33	214.154	141.785	39.6018	39.0803	46.4882	88.6291	73.7768	77.2311	77.2578	23.2636	28.3897	31.6782	25.0996	23.7749	90.5274	91.9417	122.652	37.3998	26.2489	22.6956	67.2207	59.4255	72.4436	75.8657	187.599	109.321	141.206	7.72827
mir-1839-AAGGTAGATAGAACAGGTCTT	358.086	573.211	510.416	431.912	520.917	282.706	122.524	122.282	319.641	339.519	361.362	693.108	490.129	484.592	406.217	638.107	389.702	353.057	549.977	584.627	356.197	499.672	383.687	140.109	136.153	146.444	59.3454	68.3784	63.4244	81.2638	68.3219	85.1175	80.148	71.4181	69.4995	228.769	249.438	235.046	127.076	86.5298	89.3088	174.685	143.441	188.055	196.307	190.19	108.343	146.814	93.4897
mir-29c-AGCACCATTTGAAATCGGTTA	80.09	110.7	110.167	171.235	194.062	101.498	76.9193	65.8584	107.64	136.315	126.845	141.951	119.055	120.422	74.4421	145.041	99.2102	98.9657	205.849	200.29	113.701	150.136	108.838	33.7918	27.31	31.4403	161.969	131.358	133.32	150.51	20.423	21.9376	23.6991	23.118	19.9873	87.7883	83.8332	93.5131	51.4378	41.0361	39.8647	86.4583	70.0127	98.515	86.7956	171.016	105.605	122.09	15.4565
mir-19a-TGTGCAAATCTATGCAAAACT	33.6964	33.6397	38.4923	61.5116	56.3177	29.9219	21.282	14.0161	33.5039	39.9198	40.1855	47.8983	36.4499	43.3061	32.3634	51.0683	40.5924	19.6903	45.7196	46.7437	61.0735	79.8887	56	527.179	506.655	575.468	337.153	248.322	304.61	331.922	713.726	756.2	722.523	755.465	660.037	355.91	397.864	383.119	260.123	238.788	313.906	362.638	342.721	393.845	483.697	221.024	103.845	193.202	597.927
mir-24-GTGCCTACTGAGCTGAAACAG	74.5958	70.3917	59.8502	96.3129	91.7706	47.7384	33.9499	29.7395	127.172	154.739	160.589	88.8917	75.2703	79.8381	40.8316	57.9427	42.9718	36.9837	83.4827	92.9208	59.275	116.335	71.4534	248.029	261.594	302.429	432.262	318.499	314.749	407.465	138.162	147.885	189.473	114.434	115.772	200.803	224.013	193.121	88.5236	65.4456	73.9816	617.148	554.296	672.081	657.932	232.943	99.347	139.422	65.4276
mir-652-AATGGCGCCACTAGGGTTGTG	789.062	1158.28	1058.11	2118	2639.94	1209.04	1060.86	925.968	597.367	746.995	807.697	906.07	561.015	526.689	972.805	1551.13	1362.33	2055.28	3698.68	3607.76	1413.53	1950.89	1531.18	1391.14	1402.8	1466.75	316.941	317.15	276.134	338.22	715.784	753.311	768.017	711.79	550.471	1233.21	1355.21	1068.04	330.522	185.441	273.968	1646.69	1439.52	1659.15	1452.81	237.35	94.849	168.989	277.918
mir-145a-TCCAGTTTTCCCAGGAATCCC	9.40082	13.041	11.3425	16.6247	19.9809	9.37387	8.71548	6.91823	10.6927	17.3565	17.7921	13.1557	10.4653	13.3064	11.3568	16.5727	16.5109	7.99031	17.9293	14.9203	12.6682	20.1044	14.3826	405.501	345.905	414.487	234.789	184.441	182.291	214.606	334.506	337.425	446.948	252.317	241.08	106.384	111.869	90.9856	14.7713	11.6033	16.6532	175.57	138.66	171.813	174.663	128.003	94.849	122.6	50.4964
mir-30d-GTAAACATCCCCGACTGGAAG	88.1478	104.772	97.0153	164.696	191.587	101.188	134.887	120.485	108.067	126.168	134.974	124.87	95.4857	101.551	76.0181	111.467	89.4044	94.0571	170.551	165.633	111.825	153.252	123.781	106.584	100.974	110.009	315.385	260.467	257.796	322.767	73.7091	78.6138	84.1972	73.5649	75.6141	260.194	299.738	248.128	73.1236	47.899	63.2234	363.079	306.007	384.657	382.328	162.724	94.458	118.522	37.5159
mir-28a-AAGGAGCTCACAGTCTATTGA	30.7663	49.3482	44.2843	42.8919	46.6809	24.2728	117.862	112.219	33.789	43.6582	40.6456	100.666	64.1339	69.9189	43.1949	66.9658	49.2445	34.5866	59.1663	56.3759	43.7133	57.5505	49.6248	289.166	281.432	305.182	223.905	199.287	197.824	239.786	226.466	245.029	264.502	231.181	191.887	298.826	339.043	226.869	230.894	118.863	124.31	196.576	194.328	221.391	244.313	254.968	94.0669	155.99	85.2362
mir-206-GGAATGTAAGGAAGTGTGTGG	0	0	0	3.32496	3.1828	2.17275	26.2478	24.169	0	0	0	0	0	0	0	0	0	1.19854	2.46526	2.36079	0.938388	0	0	0	0	0	0	0	0	0	0	0	0	0	0	0	0	0	0	2.47632	0	0	0	0	15.6446	462.26	91.72	87.4255	0
mir-193a-AACTGGCCTACAAAGTCCCAG	4.02892	7.11326	5.42996	9.19904	7.69175	3.66263	1.62149	2.15634	3.13653	3.73832	5.82842	5.30589	6.44023	7.62091	3.61052	7.79528	5.62382	1.9405	6.94756	7.36567	9.14927	11.9333	7.85428	35.1942	29.5582	40.5971	23.5827	20.6935	15.101	25.1803	16.6029	16.9823	22.27	18.4118	19.5766	115.61	119.703	143.168	121.418	116.599	116.352	77.3922	58.5717	78.2136	84.0094	148.991	86.0486	121.325	7.5782
let-7b-GAGGTAGTAGGTTGTGTGGTT	192.168	171.014	198.012	180.878	267.532	145.637	300.279	283.468	224.12	236.715	267.494	520.122	296.027	318.082	124.071	158.667	139.874	142.741	243.5	275.268	182.439	256.008	229.406	142.446	202.081	208.877	202.395	215.032	217.671	243.792	80.4679	111.959	102.299	112.453	84.2389	297.817	362.27	271.172	117.961	72.45	71.4027	425.215	370.042	444.494	471.697	192.004	85.6574	142.226	50.0462
mir-423-AGCTCGGTCTGAGGCCCCTCA	42.4869	48.0145	52.8515	76.6956	83.0179	47.3039	39.0171	32.8841	42.0581	46.5954	53.3761	75.8087	58.5882	62.1164	53.3701	72.0604	61.7179	46.2866	82.0261	88.2936	73.2726	92.8215	80.6849	131.16	135.029	127.683	136.313	105.267	108.08	127.619	111.666	133.432	138.264	129.213	104.5	153.089	177.974	168.591	125.399	64.5256	56.9599	135.989	122.949	149.589	134.372	153.396	85.4619	119.541	138.358
mir-145a-ATTCCTGGAAATACTGTTCTT	16.2377	20.747	19.7892	24.1614	27.2306	14.8988	18.7485	13.7467	19.8171	34.4459	30.3691	19.1884	19.589	19.4757	15.0329	29.5238	17.1599	13.926	29.1348	24.8355	21.5829	37.6811	21.3698	714.101	635.733	796.894	376.286	312.651	253.05	297.587	559.992	552.464	730.98	455.261	434.291	244.193	227.999	207.69	54.5807	41.8144	57.1811	282.814	253.754	320.335	336.253	136.294	85.4618	107.561	72.6308
mir-1a-ATGGAATGTAAAGAAGTATGT	0	0	0	0	0	0	0	0	0	0	0	0	0	0	0	0	0	0	0	0	0	0	0	0	0	0	50.2752	42.7364	40.7729	58.3725	0	0	0	0	0	0	0	0	0	0	0	0	0	0	0	121.266	85.2662	90.9937	0
mir-615-TCCGAGCCTGGGTCTCCCTCT	0	0	20.1512	0	0	0	1.01343	0.718782	0	0	0	0	0	0	0	0	0	0	0	0	0	0	0	0	0	0	0	0	0	0	15.9172	19.8212	25.2473	7.6785	4.47204	112.438	119.016	124.138	0	0	0	0	0	0	0	94.0583	84.2885	95.072	0
mir-194-TGTAACAGCAACTCCATGTGG	86.3166	117.517	117.167	131.224	143.315	73.9976	363.416	335.85	93.0977	125.1	111.507	160.557	117.937	129.797	79.4973	118.402	88.6833	73.9671	152.286	156.946	97.7491	136.44	107.052	13462.9	15561	16847.2	173.889	315.35	159.64	141.353	30542.3	20608.3	23726.8	63500.1	55834.5	5062.6	5464.41	5275.06	8786.86	6255.9	6561.32	316.645	124.144	169.035	175.091	160.651	84.093	373.153	53.1973
mir-30b-GTAAACATCCTACACTCAGCT	73.1309	72.0219	66.2454	142.086	157.284	86.413	126.983	119.407	85.684	94.9264	112.58	97.6864	79.6084	77.2373	60.6567	84.1522	73.1101	71.5135	136.261	137.87	90.4768	127.152	97.6181	80.673	79.7482	92.4639	329.638	277.114	236.223	307.316	65.2849	65.8641	68.5963	71.4181	60.6006	229.345	252.187	212.596	75.5328	56.0357	67.9393	251.858	221.822	282.937	255.885	143.549	84.093	108.326	33.089
mir-340-TTATAAAGCAATGAGACTGAT	354.057	518.972	510.657	444.769	499.08	250.984	411.655	366.397	396.058	416.02	438.665	434.791	358.06	355.34	342.278	558.743	363.818	197.645	430.525	464.037	426.811	716.707	413.166	190.263	175.895	228.023	118.691	110.215	99.4511	153.944	133.949	172.868	146.839	132.351	147.075	252.697	271.29	245.898	189.618	121.41	128.289	125.154	128.072	127.578	166.519	158.319	83.8974	135.344	235.975
mir-29b-AGCACCATTTGAAATCAGTGT	410.583	735.482	658.231	863.934	1039.89	461.803	149.886	139.443	513.25	683.309	686.067	718.111	756.683	743.945	434.838	846.617	493.526	443.918	1012.33	960.37	561.157	713.943	493.29	164.952	139.988	168.6	302.945	249.221	244.853	297.014	119.208	127.341	130.166	110.059	112.577	300.267	314.855	346.101	144.256	99.1231	122.173	280.381	222.333	277.594	277.746	132.925	81.5507	85.6412	130.33
mir-23a-TCACATTGCCAGGGATTTCCA	76.6716	64.6122	56.1096	80.4639	107.066	56.7398	28.7814	20.1257	88.2504	113.752	127.459	96.6689	77.8195	77.5397	56.2584	70.7099	58.978	51.6516	103.653	98.7756	64.9835	116.805	86.6516	302.189	308.742	312.355	348.038	251.021	255.424	311.892	149.769	154.44	183.996	118.645	94.1415	225.453	242.704	207.244	57.4092	51.3658	52.3914	350.698	323.766	433.808	348.04	194.077	81.1596	116.992	34.8898
mir-181a-ACCACCGACCGTTGACTGTAC	8.54618	10.6699	11.2219	15.4056	14.2342	9.43598	6.48596	5.21115	7.27104	6.40854	8.58925	18.3888	12.0307	14.9394	8.99349	13.0126	12.1849	7.8191	14.4555	13.9759	12.981	16.9889	14.3825	7.21247	10.4479	9.02866	38.095	44.5361	39.2627	51.5053	2.69368	4.69722	4.52545	3.13745	3.01179	12.5412	18.2784	14.5695	2.93332	1.98105	1.03162	14.594	9.56272	11.9671	13.9301	180.603	80.9639	122.09	1.72573
mir-107-AGCAGCATTGTACAGGGCTAT	518.307	789.968	710.118	645.965	806.162	425.59	252.344	232.285	542.287	617.401	636.27	988.518	779.968	727.132	559.325	795.568	566.299	492.621	837.78	884.825	539.626	830.592	581.488	196.072	196.262	217.692	224.251	196.138	250.678	278.891	137.672	149.141	147.236	157.065	134.466	669.008	789.499	1313.59	726.622	353.901	288.583	202.326	180.951	225.238	222.168	173.607	80.312	112.319	74.6315
mir-181a-ACATTCAACGCTGTCGGTGAG	347.342	289.865	287.667	485.778	554.071	334.852	385.104	361.007	454.94	461.815	525.632	487.343	369.776	400.279	272.43	347.78	315.655	232.289	427.611	505.492	405.306	721.233	478.498	113.463	108.248	133.638	122.837	98.0692	98.804	131.625	83.7001	96.3186	108.015	76.0419	71.0965	162.315	183.196	142.425	14.4571	8.27799	13.5584	260.702	241.971	263.491	285.032	179.566	79.0082	120.306	54.548
mir-127-TCGGATCCGTCTGAGCTTGGC	4447.44	7085.25	6801.33	7699.62	8003.22	3922.87	2181.21	1939.35	4223.05	4433.11	4726.55	7199.8	6998.02	7035.98	6304.69	10339.9	6578.29	5068.19	8665.08	8964.49	4661.84	8593.71	5479.79	214.905	197.584	270.861	93.2939	89.9716	80.4669	96.7156	132.235	121.353	162.559	113.608	112.485	38.921	81.4969	25.4223	13.1999	10.4713	10.0214	61.2504	51.058	54.4932	69.222	175.939	78.6172	113.679	10.7295
mir-362-AATCCTTGGAACCTAGGTGTG	105.362	125.519	132.491	166.691	183.01	94.608	73.7775	69.9908	102.792	109.345	122.09	151.181	129.341	128.648	125.056	198.627	144.994	93.8293	168.759	186.881	166.877	253.95	193.705	184.186	151.693	172.954	139.422	126.41	126.417	135.059	130.717	144.168	137.312	138.874	138.223	301.421	314.993	301.5	98.2659	65.4456	90.5614	221.121	187.497	252.378	245.17	164.538	78.4216	134.069	153.215
mir-350-TTCACAAAGCCCATACACTTT	59.2129	64.1676	68.7794	95.5372	98.8434	57.2364	39.0171	37.2867	51.8953	55.4071	56.7504	81.1873	70.1269	69.0115	62.1665	88.8171	69.5046	42.4057	92.8957	95.9425	94.9337	137.969	101.902	20.9028	17.5234	22.1555	121.282	96.2695	98.3726	105.3	26.2512	32.7773	27.1527	26.5032	32.4907	44.3986	43.8406	41.9246	34.4665	27.947	24.0957	94.8607	94.9441	108.559	124.086	119.97	77.4437	110.62	76.8323
mir-324-CGCATCCCCTAGGGCATTGGT	575.281	958.512	813.649	1038.6	1230.06	614.889	366.862	335.849	536.489	599.199	684.379	1239.9	860.307	918.017	660.199	997.117	619.486	759.42	1380.43	1453.77	734.994	833.335	723.715	151.195	143.493	161.556	81.1138	71.9772	64.503	62.9509	99.0782	100.758	111.826	97.0954	84.4218	270.284	277.75	263.292	70.8185	37.074	41.6331	212.496	181.521	240.624	213.453	122.82	77.0526	94.0524	60.7005
mir-218-TTGTGCTTGATCTAACCATGT	8152.56	11345.8	11199	17614.5	16974.1	8205.22	2410.85	2270.17	7280.88	8417.34	8218.38	21311.5	17290.1	17576.2	4160.18	5128.68	2489.12	8090.25	15075.6	15548.4	6607.12	5029.06	4921.37	154.935	136.814	208.045	371.362	454.806	384.429	637.521	261.631	259.689	332.621	233.657	240.714	1689.16	1776.85	1347.39	10.2666	6.57992	8.98982	681.715	623.796	715.889	716.225	193.299	72.9457	160.322	52.8221
mir-138-AGCTGGTGTTGTGAATCAGGC	6492.67	12548.4	10798.7	29803.9	33032.2	15874.3	2206.54	1981.76	8063.59	8738.84	9313.81	17683.8	13545.3	15442.2	7802.57	10158.9	7378.91	18451.9	30138.2	30390.6	13621.3	8485.9	10663	161.413	133.376	169.047	35.5035	29.6906	36.6739	29.1862	175.041	178.391	204.836	231.345	261.204	76.1119	59.3704	36.5725	4.92379	5.09416	6.55816	70.9796	38.5924	48.5096	55.7204	112.196	72.9457	124.894	81.4094
mir-532-CATGCCTTGAGTGTAGGACCG	192.534	266.155	244.71	318.974	342.769	163.391	159.514	145.822	174.22	185.447	213.351	275.106	219.952	211.511	252.212	395.901	290.852	213.626	349.844	385.565	291.683	388.274	319.578	157.072	129.805	148.173	109.62	100.768	91.9006	133.914	124.987	146.853	141.241	140.938	128.229	279.654	297.126	261.657	93.0284	75.6339	78.9188	170.484	146.856	170.104	192.879	152.1	71.1856	130.756	133.782
mir-199b-TACAGTAGTCTGCACATTGGT	3.41848	2.22289	3.66019	1.55165	2.3871	1.30365	3.17541	3.08476	2.56625	4.58389	3.42548	4.14295	3.54809	3.66933	2.14443	3.02808	1.97074	1.31269	2.05439	2.67557	1.66825	3.60548	2.7541	138.818	121.319	140.703	138.991	117.563	110.957	124.185	107.552	104.268	128.777	115.452	111.04	120.511	118.053	101.788	24.0951	17.9002	26.6502	236.747	219.601	245.966	287.604	142.599	71.1204	86.236	28.7121
mir-100-ACCCGTAGATCCGAACTTGTG	74.5958	80.0242	95.6875	124.353	119.09	73.0045	51.989	53.0998	67.1503	65.6875	82.5182	88.3829	68.4274	76.0277	80.8097	102.873	95.3883	53.4779	93.6801	113.979	128.246	203.455	152.598	23.7744	22.3505	28.1106	71.5253	65.6792	67.739	82.9808	21.5005	20.3374	21.9127	17.0083	19.4397	20.6137	21.1644	19.3269	16.7618	13.0184	14.5164	41.3495	41.4953	46.3725	49.5056	100.018	70.9901	75.9557	7.5782
mir-423-TGAGGGGCAGAGAGCGAGACT	115.373	132.188	151.194	171.9	207.853	131.11	86.1419	78.3468	112.487	120.827	138.195	194.064	134.753	142.317	148.163	183.465	154.511	118.143	210.221	220.592	197.375	251.306	220.379	294.509	280.572	268.235	156.785	139.906	158.13	176.835	185.57	238.68	205.313	251.739	177.558	313.241	389.207	319.489	266.618	166.409	133.153	293.87	274.587	332.515	302.176	122.561	69.6212	103.993	151.564
mir-181c-AACATTCAACCTGTCGGTGAG	911.513	1075.88	929.25	629.636	600.134	319.519	1065.82	935.578	1193.03	1329.64	1402.05	1615.82	1054.9	1115.98	958.689	1588.33	974.583	364.243	622.704	717.587	641.233	1503.01	750.389	349.538	320.181	398.095	639.322	508.34	480.213	659.841	370.162	349.297	407.767	325.304	273.753	285.853	335.332	259.724	45.4665	35.8712	40.3805	359.321	367.652	419.276	543.062	192.781	68.4478	125.403	143.311
mir-339-TCCCTGTCCTCCAGGAGCTCA	48.9575	67.576	62.3842	73.4815	81.0728	43.7654	32.4298	31.806	50.1845	47.797	59.2045	87.1473	59.4826	65.9268	56.718	76.2342	63.8809	47.314	85.2756	82.6278	69.0498	79.4773	74.8707	45.2782	43.9075	51.931	103.66	75.5762	73.7794	107.017	35.3608	52.1339	42.8727	51.2725	43.7165	177.738	183.746	211.555	56.8854	52.4271	62.0445	122.501	112.02	146.597	134.373	100.277	66.101	90.4843	69.5543
mir-142a-TAGTGTTTCCTACTTTATGGA	2.56386	3.85302	5.67128	8.97738	6.71923	2.54522	1.82417	1.7071	5.1325	6.54204	7.20883	4.94247	6.1719	5.504	3.54487	5.8925	4.75862	2.45416	4.03408	4.62716	5.31754	7.93597	4.28416	68.5185	31.2113	48.0249	53.1256	35.9886	40.1257	56.0835	128.611	304.184	137.907	149.029	168.477	49.1557	39.168	50.3988	45.1522	38.8428	48.8545	143.065	141.05	141.041	147.017	95.0951	64.3409	136.873	862.042
mir-143-CTGAGATGAAGCACTGTAGCT	4.88354	6.66869	8.56726	11.859	10.5209	4.28343	8.20876	6.46901	6.84333	16.4218	14.2643	9.88493	8.94475	8.89105	7.35234	11.3554	9.66141	5.8215	11.766	11.804	8.05451	14.6374	8.10929	868.033	739.417	988.542	125.947	111.565	93.8422	142.498	545.594	548.747	756.941	458.893	404.857	132.043	118.191	113.583	18.2285	16.4144	21.2218	168.494	136.781	184.422	171.877	85.7669	64.3409	77.4851	31.7384
mir-151-CTAGACTGAGGCTCCTTGAGG	148.704	132.929	170.984	253.694	267.266	157.679	96.3775	76.7298	159.678	154.606	183.595	232.223	149.735	172.136	139.563	169.594	176.502	130.699	250.448	281.596	256.258	380.868	288.416	149.925	154.206	163.029	165.596	126.41	141.087	157.377	139.827	130.386	147.315	141.02	118.692	221.129	247.102	218.097	78.5712	59.9268	64.2553	258.933	217.039	283.578	277.102	111.678	64.1453	102.209	43.5934
mir-503-TAGCAGCGGGAACAGTACTGC	33.086	52.0157	40.3024	30.1462	28.0262	14.961	5.26984	3.95328	28.9416	26.5688	26.9948	31.5446	28.1313	26.4918	33.6107	36.5825	24.8746	20.1469	28.1264	33.5233	30.3412	25.8654	23.6138	46.2133	26.6487	43.6707	179.073	181.293	161.581	172.829	22.1862	26.7896	28.4627	31.7873	29.3421	183.937	242.43	166.212	28.9141	19.4568	27.78	317.307	306.518	336.576	385.757	113.751	63.9497	90.4843	44.5688
mir-335-TCAAGAGCAATAACGAAAAAT	1070.84	2251.19	1776.08	1192.55	1535.61	750.409	251.534	204.402	1310.5	1606.4	1584.25	612.067	794.294	513.625	1386.24	2001.3	1441.79	1097.47	2104.89	2017.06	936.671	985.001	981.324	79.2701	76.9044	112.827	329.639	281.161	281.095	412.614	61.563	56.6246	75.0273	54.8228	53.1626	125.267	147.602	129.788	132.104	74.2896	139.931	222.669	210.721	237.633	347.396	105.2	63.363	82.5826	35.9402
mir-30a-TAAACATCCTCGACTGGAAGC	20.5109	22.9699	22.0819	48.3226	55.5221	28.6183	28.6801	23.0908	34.074	43.9251	42.7929	35.3969	29.7414	27.278	17.1335	22.9561	24.2257	29.1646	48.2967	51.7485	31.5924	40.3265	31.7741	23.5741	23.8053	30.2877	81.6321	61.6306	70.3276	103.583	14.4479	14.1949	17.2682	14.8616	14.5113	128.295	129.324	112.84	44.1045	32.8997	39.9383	82.2569	75.6478	89.1121	90.2244	114.529	59.843	77.2301	3.52649
mir-133a-AAGCTGGTAAAATGGAACCAA	0	0	0	0	0	0	0	0	0	0	0	0	0	0	0	0	0	0	0	0	0	0	0	0	0	0	57.2721	51.7338	49.8334	48.0716	0	0	0	0	0	0	0	0	0	0	0	0	0	0	0	90.69	58.4738	64.7407	0
mir-210-CTGTGCGTGTGACAGCGGCTG	101.456	88.4712	92.9123	153.169	180.977	105.844	60.4004	54.2678	112.345	131.508	131.6	104.155	93.5622	96.5919	77.134	125.031	95.6773	66.719	150.717	174.132	120.426	246.544	171.621	649.991	661.985	696.106	432.262	344.592	299.864	374.271	70.0359	87.9051	100.393	63.9874	46.9108	207.578	210.958	157.441	88.1046	48.182	64.1078	189.501	148.905	192.329	220.096	188.635	57.6917	116.227	51.472
mir-1843a-TATGGAGGTCTCTGTCTGACT	165.429	237.108	209.234	297.805	300.598	146.567	88.5741	78.6165	236.38	249.933	261.359	269.365	211.32	228.87	160.176	253.193	166.912	159.749	285.522	314.174	179.936	301.626	173.049	26.2453	30.6163	33.4254	57.0128	52.6334	51.9907	56.656	20.472	27.3058	26.5573	21.4667	20.3524	100.041	104.036	90.3906	104.238	80.728	87.9087	59.9237	45.2522	59.1946	63.4357	94.5768	56.1272	71.8776	31.1382
mir-101a-ACAGTACTGTGATAACTGAAG	55.5503	74.9857	59.7295	121.472	132.705	67.4173	117.963	102.336	64.8692	76.5019	79.1438	101.757	82.739	85.0397	46.3459	75.3748	57.6081	58.6716	122.703	131.449	76.8697	102.756	77.2677	33.5914	33.4597	41.2375	76.1899	64.7795	60.6199	80.6918	33.9894	34.8936	37.6327	30.7966	29.7984	155.106	166.292	176.47	62.7522	46.9794	57.6231	81.1513	73.4279	90.3944	98.5825	107.532	54.7582	75.9557	16.2819
let-7d-AAGAGGTAGTAGGTTGCATAG	51.2772	60.0182	60.2121	69.7132	87.8805	49.9112	44.9962	42.0486	47.4757	54.072	55.6768	72.538	59.259	53.5278	53.7639	72.2444	64.8903	51.252	88.6373	90.1823	61.7773	109.752	74.1566	25.7779	24.7311	26.5098	74.6351	64.3297	70.7591	70.9629	15.0357	20.389	17.2682	19.898	14.9676	42.0923	44.94	36.1265	30.276	16.4144	17.1691	55.059	41.6662	43.5945	47.5767	87.5808	52.9981	61.1723	12.5303
mir-124-TTAAGGCACGCGGTGAATGCC	16477.5	21234.2	16782.6	33824.5	31640.8	15403.8	19756.3	17873.7	22522.3	25132.9	27130.3	28342.7	21596.2	23442	12711.8	18944.2	13255.3	16013.5	30890	32035.1	16604.3	25620	14785.4	17.163	16.5314	22.0915	9.58851	4.94844	22.2202	0	11.8522	13.5239	15.6009	13.1277	11.9102	37.7677	22.9511	13.9749	8.48567	5.23565	1.98956	7.73922	0	0	16.2875	43.013	52.8025	37.2133	1.95082
mir-222-AGCTACATCTGGCTACTGGGT	2233.24	3149.84	2942.19	1937.01	2526.52	1314.26	503.269	493.351	1957.2	1918.96	2227.23	5182.98	3850.95	3768.9	1842.35	2190.66	1712.31	2313.93	3916.75	4123.94	1826.18	1383.63	1470.03	234.539	237.789	221.363	139.163	133.608	128.143	145.932	80.272	100.397	91.2235	82.6467	67.0352	819.503	904.987	834.777	160.704	113.628	94.5404	790.065	716.35	823.596	839.239	101.055	51.8247	77.2301	99.1171
mir-132-TAACAGTCTACAGCCATGGTC	5922.77	7095.78	5564.38	10850.4	11153	6149.57	818.04	833.242	10854	11937.3	12611.7	5219.38	3476.79	3735.39	4514.99	5689.76	4044.18	6939.74	10708.8	11122.9	5995.06	4964.51	4794.73	203.552	155.396	182.751	175.704	121.012	125.123	152.799	145.165	157.073	177.088	176.853	151.73	100.618	100.188	79.9838	31.8475	21.8624	28.3695	77.6133	66.9389	74.5808	78.4375	79.8072	51.8247	56.0748	34.3645
mir-219a-TGATTGTCCAAACGCAATTCT	3621.51	1805.14	4424.58	7439.47	7178.16	4406.95	1821.03	1711.41	2754.88	2431.64	3357.94	2244.9	2146.34	3014.31	3572.64	5742.09	5330.37	1252.59	4008.86	4438.28	10849.5	15699.5	9877.5	82.0085	62.7534	70.7569	189.957	124.161	136.126	123.613	74.2967	75.7228	77.8855	80.9128	65.2553	155.685	161.482	132.464	92.9236	78.6054	78.0344	98.6198	69.5003	86.7614	98.1539	91.9857	51.4335	72.3873	96.7157
mir-499-TTAAGACTTGCAGTGATGTTT	5.73816	4.89037	6.27462	6.87158	6.71923	4.15927	5.26983	3.50404	9.26701	9.87978	9.81629	5.37856	5.05378	5.56446	4.79214	12.1533	9.51719	2.85368	5.60287	6.32692	5.86494	17.9882	8.05828	0	0	0	3923.53	2916.43	3074.35	3203.62	0	0	0	0	0	3.02719	3.29836	2.67604	2.19999	1.48579	0.884244	0	3.75677	2.13699	2.14311	337.109	51.0424	88.6999	2.92624
mir-511-AATGTGTAGCAAAAGACAGGA	2.44177	2.0747	3.37863	1.88414	2.4755	0	2.02686	2.69542	4.13452	4.13884	5.82842	3.41611	2.45981	2.47982	2.56019	3.13039	2.73981	2.56831	2.9135	3.02181	1.64218	2.93925	2.95811	52.1569	39.0143	43.7988	76.7083	84.5733	84.9974	109.306	35.6056	43.0492	50.2563	28.7324	33.2665	16.2891	16.4919	14.2722	110.104	82.2135	101.541	61.0294	55.3271	69.4519	68.7936	139.663	50.2603	98.3856	102.118
mir-18a-TAAGGTGCATCTAGTGCAGAT	27.8362	30.8241	31.9764	43.8895	37.84	19.6789	7.60075	8.08629	26.3754	24.9666	24.3873	44.9183	30.4122	34.657	25.208	32.4088	25.8119	18.2065	37.5393	40.039	37.0663	43.3834	32.9471	461.999	430.678	436.963	121.541	86.3728	107.217	149.938	738.856	696.635	765.516	806.324	661.727	175.144	190.068	189.107	99.5235	95.5856	115.099	166.725	151.979	176.087	213.453	90.9491	49.8691	82.328	247.455
mir-101b-ACAGTACTGTGATAGCTGAAG	55.3061	77.8013	76.0194	170.238	187.165	90.4483	71.6495	64.8697	55.7447	65.554	72.0884	141.442	86.138	99.7977	56.1271	92.0088	74.1188	85.8959	167.638	177.059	93.526	110.869	96.4955	35.5281	36.1708	44.5032	42.5005	44.5359	35.5953	53.7945	40.3563	42.0168	45.4927	44.8325	39.5183	60.6878	69.6778	52.034	557.645	446.869	500.335	67.663	62.1577	71.5889	72.0082	108.31	48.6957	66.2702	25.961
mir-345-TGCTGACCCCTAGTCCAGTGC	102.066	151.454	122.596	130.671	151.094	78.9642	101.039	86.6129	98.9433	112.95	118.563	169.352	147.231	153.93	123.414	182.36	128.482	87.2086	166.629	168.467	123.476	168.419	132.503	159.409	166.703	191.203	229.347	158.8	178.192	168.823	80.8103	77.5298	98.0121	74.5557	70.9136	115.609	122.177	93.3641	81.8184	51.7195	59.9813	112.108	105.361	114.542	116.156	118.156	48.1091	79.7789	16.3569
mir-30c-CTGGGAGAAGGCTGTTTACTC	38.3358	34.8254	36.441	89.663	95.0419	60.0921	54.3198	49.3262	61.5901	63.6848	77.3033	70.4302	46.9601	47.9029	30.7222	40.3267	35.8338	60.6692	89.4219	98.0202	59.4313	67.8966	56.102	25.1101	27.31	27.1501	86.556	85.0232	85.6446	88.7037	12.6358	13.5238	17.1491	15.9349	12.0015	188.983	218.928	178.7	80.981	57.097	64.1078	81.3724	66.2559	91.4628	85.2954	87.0626	47.7179	66.27	4.20178
mir-744-TGCGGGGCTAGGGCTAACAGC	228.305	255.633	252.916	200.828	278.494	159.417	103.066	94.7891	208.294	250.067	311.361	472.514	329.257	347.961	320.483	513.751	324.451	160.377	319.587	284.523	208.792	238.255	253.735	50.888	60.3068	58.6545	46.1286	47.685	44.2245	56.0835	45.3519	57.8118	61.4508	46.4837	33.3122	99.6091	132.896	107.339	52.4854	27.4517	27.5589	74.7387	73.2571	93.8135	74.7944	76.957	47.5223	64.9957	18.6079
mir-872-AAGGTTACTTGTTAGTTCAGG	136.739	187.909	176.292	241.836	273.455	136.2	103.268	90.1166	124.464	149.532	155.987	238.256	194.906	193.789	136.543	200.836	143.912	132.125	252.466	262.615	192.448	243.428	203.446	86.4828	89.4679	99.0593	64.5282	57.5818	51.775	68.1014	76.0107	72.7296	92.6528	62.0059	60.3269	193.451	222.777	166.955	44.6284	32.0506	40.012	199.451	162.566	199.167	210.238	81.1027	47.5223	66.525	31.2882
mir-144-TACAGTATAGATGATGTACTA	5.49398	7.85423	5.79195	12.8566	9.72521	3.10393	6.18192	3.5939	9.83726	11.3485	9.0494	6.9776	7.20053	5.62496	5.05473	7.05872	5.55173	3.59563	11.0937	5.00488	6.56872	12.7563	5.96722	3.27233	6.61258	4.54637	246.192	103.467	218.102	244.937	4.84863	8.10396	6.19272	6.52259	13.0511	130.169	146.777	214.826	88.5236	166.833	111.857	196.355	197.06	302.169	306.035	40.4219	46.5445	45.3695	293.599
mir-3068-TTGGAGTTCATGCAAGTTCTA	153.953	201.394	195.84	247.82	254.27	136.945	70.028	61.7251	160.534	177.17	184.669	279.321	215.166	226.39	167.2	262.155	208.947	128.359	240.7	249.961	175.479	303.507	188.044	52.6911	40.0722	51.0345	104.696	73.7768	71.1907	80.1195	37.4667	38.7649	43.9445	33.6038	36.4608	94.2752	88.5059	101.987	39.9141	34.527	31.6117	85.5737	66.939	89.7533	90.8675	83.4347	45.5666	50.4671	44.4938
mir-345-GCTGACCCCTAGTCCAGTGCT	23.9294	31.1205	35.717	31.698	38.4588	19.3064	14.6948	12.6685	21.1003	24.1656	24.3873	42.1563	31.3066	34.4755	32.429	43.1503	38.5737	22.2587	41.4613	41.6444	35.4242	49.7909	36.0583	36.3963	36.3031	39.7006	40.1681	31.9399	36.4583	40.0596	21.0597	17.1371	27.0337	17.0908	17.3405	38.2002	42.1915	33.0044	18.2285	12.0278	10.6846	26.3133	24.419	28.6356	21.0024	70.4791	45.3711	43.3304	4.42687
mir-214-TACAGCAGGCACAGACAGGCA	0	0	1.20666	0	0	0	0	0	0	1.33511	0	0	0	0	0	0	0	0	0	0	0	0	0	88.687	76.111	83.051	102.364	81.8742	67.7389	84.1255	65.5301	64.3673	76.3372	73.8126	69.6359	89.9509	94.0032	77.6052	26.0856	17.5465	24.243	123.385	103.653	129.501	120.228	76.1796	44.1977	38.7424	19.8084
mir-125a-CCCTGAGACCCTTTAACCTGT	283.856	438.504	344.138	427.478	528.079	277.43	485.838	438.635	324.204	372.362	421.026	509.583	359.311	404.331	316.873	459.186	330.291	323.721	574.072	584.627	293.951	426.544	321.719	93.0274	96.0145	97.0105	145.643	136.757	133.537	157.377	51.18	58.2248	69.3108	59.6116	49.5576	288.735	302.762	243.817	38.5522	25.1169	42.2964	261.585	235.312	292.125	267.674	102.35	43.8066	72.3873	29.5625
mir-154-TAGGTTATCCGTGTTGCCTTC	1461.28	2202.89	1750.25	2896.15	3017.56	1536.39	725.312	639.713	1736.63	1789.31	1888.72	1715.83	1674.68	1517.29	1544.71	2344.23	1576.69	1808.55	3220.76	3263.76	1551.08	2026.9	1544.84	64.9122	59.5793	77.6083	47.4244	44.086	39.047	39.4874	29.8264	29.9899	37.5136	30.2186	24.8244	8.64909	24.0505	5.05474	5.86664	4.66964	3.90541	24.3233	21.6869	27.9944	28.289	84.9895	43.0243	61.9371	5.77744
mir-137-TTATTGCTTAAGAATACGCGT	10979.4	21735.1	18940	9649.91	10159.4	4872.8	285.281	247.799	6083.72	5927.49	6410.5	19512.7	15318.1	14335.6	9477.1	15410.8	7309.21	7846.22	14409	15927.5	6952.22	5136.28	4902.6	267.396	251.543	343.09	22.0277	27.4413	24.5932	10.3011	194.337	192.741	264.262	194.604	180.889	29.6952	31.8842	10.2582	305.484	142.211	314.054	14.8151	4.95212	5.76986	12.2157	37.0534	42.6332	33.8997	3.00127
mir-191-AACGGAATCCCAAAAGCAGCT	67.8812	90.1014	85.552	116.263	134.65	77.5363	46.7192	44.3845	63.4435	77.0359	76.2296	128.431	89.224	103.547	71.6852	94.1571	71.2351	84.0695	143.209	141.081	82.578	96.525	86.5503	135.1	120.084	133.766	81.3729	75.1262	70.7593	89.2759	110.49	130.696	126.594	109.975	87.8892	125.124	137.844	116.705	51.8569	42.3096	46.9385	89.3326	78.5509	91.2491	88.7242	62.1874	42.0466	58.1138	86.6616
mir-143-GAGATGAAGCACTGTAGCTCA	6.47069	8.2988	10.8599	14.1864	17.0633	6.64241	5.67521	6.10962	9.12443	13.0841	14.5711	13.6645	10.3759	10.645	9.19039	15.5292	11.9687	8.10448	19.9463	13.0316	11.3389	18.5173	10.4044	308.935	270.719	330.732	95.6263	72.8771	69.8962	86.4145	286.216	264.695	390.023	245.133	190.153	87.4996	81.6344	70.3203	13.5142	12.0986	15.1795	84.0258	70.3542	94.6684	92.1533	60.3735	41.6554	47.9183	10.2043
mir-181b-ACATTCATTGCTGTCGGTGGG	67.2708	48.7555	69.1415	88.998	116.879	78.6533	56.8535	49.5957	66.7226	74.3657	79.1439	90.0546	67.0857	73.5478	69.1247	86.7301	81.2573	46.6862	92.3355	115.301	108.306	192.58	139.031	28.1152	29.0293	29.2631	23.8418	32.3897	26.1032	25.1803	17.7293	19.2534	20.3645	15.4396	13.0511	34.5964	41.6418	31.6664	4.19046	1.9103	2.8001	44.4451	42.8615	46.3727	51.8629	83.6938	41.6554	53.7806	7.35311
mir-7a-TGGAAGACTAGTGATTTTGTT	1814.11	6831.98	4079.11	2946.13	2451.56	1270.93	285.686	267.296	475.184	521.094	531.46	3118.69	3535.24	2573.01	4537.04	9902.34	3655.84	2786.22	3949.81	4110.24	2142.73	1760.96	1674.95	797.714	751.453	850.615	51.5708	44.5359	56.9525	55.5113	1114.75	1030.65	1226.28	1123.13	1055.49	181.198	275.55	212.15	330.313	314.846	279.495	137.758	111.849	128.005	153.66	69.4425	40.4819	74.9363	188.48
mir-145a-GATTCCTGGAAATACTGTTCT	5.86026	7.70603	8.32593	6.87158	7.42651	4.78005	5.1685	3.5939	4.84737	12.283	10.5832	7.05028	7.06636	7.74187	6.43329	11.3553	8.1473	3.99515	8.74049	8.30999	5.08295	13.0503	8.31327	279.55	247.972	306.976	114.544	99.4186	86.5074	104.155	204.916	202.755	270.813	170.248	152.187	76.9769	76.6869	63.7789	19.4856	14.0089	19.3796	110.781	96.4808	116.466	128.8	48.4544	40.0908	52.7611	25.8859
mir-450a-TTTTGCGATGTGTTCCTAATA	20.9993	29.4903	26.1844	27.8187	21.307	10.9258	4.76313	7.27766	19.9597	23.3644	21.4732	23.9128	23.1222	20.8667	21.86	25.9025	16.6551	13.8689	20.5065	25.8744	24.5545	26.6296	21.7267	31.5879	23.1441	31.1842	150.048	113.814	110.453	130.48	37.6625	35.1001	29.5345	45.9883	48.0516	251.978	265.107	231.625	43.895	31.3431	47.086	206.084	227.285	232.93	279.46	72.8113	39.6998	57.859	30.0127
mir-27b-GTTCACAGTGGCTAAGTTCTG	15.7494	19.2651	24.3745	34.8012	41.73	27.8112	9.83028	10.1527	25.0923	27.1028	31.136	34.1611	29.786	32.8425	13.7856	18.9665	17.8088	20.204	35.8584	36.2619	30.263	40.7968	33.8143	42.3399	40.469	46.7443	69.9702	46.7853	65.7974	54.3668	16.8478	19.5115	22.0318	16.3478	14.2375	39.4975	46.0396	35.5319	11.2095	4.95262	7.44241	98.1777	71.3787	94.0273	77.1517	64.0011	39.6997	35.9387	4.80203
mir-362-AACACACCTGTTCAAGGATTC	52.0097	63.8712	64.0736	95.9804	90.8864	44.5103	39.7264	41.6892	57.4555	70.2268	67.487	72.6107	73.6602	71.6124	50.416	98.1468	63.3761	34.7578	76.8714	79.7003	85.9409	125.33	79.8688	83.6112	68.8372	83.9476	78.5223	71.0775	58.8941	81.264	67.2934	78.3555	74.5508	72.4089	75.523	180.333	179.074	167.103	69.352	55.3987	63.1496	97.0721	88.9673	104.285	119.799	82.6575	39.3085	71.3678	94.9904
mir-425-AATGACACGATCACTCCCGTT	63.1199	92.7687	82.294	138.984	130.406	70.0868	38.105	31.177	57.0277	58.7449	69.0209	118.11	92.6677	101.007	80.0881	107.784	90.2694	75.223	133.909	133.432	87.7396	106.107	94.7107	211.566	181.912	199.655	57.013	35.5388	55.011	61.2342	215.887	206.11	212.696	205.503	172.082	152.657	170.278	155.953	72.9141	55.4693	59.0969	94.8608	83.5029	89.967	91.9389	67.8879	38.9174	66.0151	144.361
mir-99a-CAAGCTCGTTTCTATGGGTCT	52.9864	57.9435	61.6602	68.1616	63.5675	30.729	55.6373	42.4979	50.327	56.4753	55.9835	108.298	87.3458	94.1726	34.2014	58.127	37.7084	25.2265	56.0287	63.2692	52.9408	83.5921	53.7049	8.74846	8.26575	11.1418	55.9764	42.7366	39.91	44.6378	4.11399	5.11016	5.00183	3.7154	4.15261	71.6433	88.0937	50.1014	23.7808	24.5509	27.1168	96.4084	87.0889	96.8054	87.8671	83.176	38.722	63.9761	4.95209
mir-193a-TGGGTCTTTGCGGGCAAGATG	2.56386	2.81567	2.53398	3.32496	4.24373	2.97977	1.01343	0	1.99597	1.06809	2.14732	4.07026	3.1754	3.38706	3.47923	4.29661	3.38871	1.9405	2.46527	3.21069	3.04977	4.17373	5.35519	6.94534	5.81907	7.29979	4.14639	4.04872	2.37302	5.15053	2.54675	3.30353	3.81091	2.97232	2.41856	23.0642	32.8462	27.8011	17.8094	17.7587	14.6637	21.8909	16.0517	20.3013	23.1455	52.6001	38.5264	40.5266	0.900381
mir-192-CTGACCTATGAATTGACAGCC	26.9816	29.6385	35.1137	37.0178	45.3549	22.3483	66.0757	55.346	28.9416	41.5219	29.6023	44.3368	32.6036	35.5643	20.1533	33.5136	29.3448	18.8914	39.4443	36.9229	33.3128	54.141	38.5064	7904.54	8574.87	9622.13	87.8516	112.015	73.7794	60.0895	9708.91	7723.83	9041.02	9624.51	8836.78	3291.41	3659.53	3725.04	5243.41	4147.12	4066.05	113.656	47.3013	74.7945	73.7226	90.69	37.9396	110.62	21.6842
mir-150-CTCCCAACCCTTGTACCAGTG	28.6908	23.5627	26.9085	41.3403	34.2151	23.0932	16.9243	16.3523	31.6504	35.6475	38.3449	36.4143	24.4639	26.915	30.5253	32.0404	30.0658	25.2265	35.0739	40.5112	28.9337	46.6165	29.224	9.68342	4.56268	8.7085	35.7627	35.5387	37.9683	42.9211	7.9831	54.5083	8.93182	6.93539	6.89062	11.9646	13.056	9.51484	3.03808	2.12256	3.16854	51.0789	52.5949	48.5095	43.0763	61.1509	37.7441	84.3668	243.253
mir-361-TCCCCCAGGTGTGATTCTGAT	72.2761	97.956	93.2748	117.814	140.573	79.771	60.4004	57.2328	77.8429	96.7952	91.5675	128.287	96.2903	95.6242	76.346	115.578	83.6363	78.4762	125.616	145.897	94.8555	140.966	110.368	26.9801	22.615	29.6473	41.7229	45.8856	32.5751	40.0596	23.9003	32.5191	27.7482	29.2278	25.8283	50.453	48.9257	49.8041	29.3332	18.9615	20.264	47.9831	39.7877	47.0136	50.1485	59.078	36.7662	38.9974	39.2416
mir-379-TGGTAGACTATGGAACGTAGG	629.123	955.994	823.422	1189.78	1240.41	683.61	195.389	174.753	654.394	663.55	691.741	806.93	745.77	667.797	679.76	969.314	607.589	909.98	1457.75	1466.43	611.987	538.588	569.588	63.7769	57.5956	76.1997	29.543	31.9399	35.5953	44.6378	36.2913	36.1324	38.5855	29.5581	28.8858	14.5593	29.1355	10.1095	6.28569	7.71194	7.00026	21.2276	17.5886	23.9343	27.8601	59.5963	35.9839	45.3695	3.97668
mir-676-CCGTCCTGAGGTTGTTGAGCT	160.302	267.636	257.862	135.658	142.519	85.9171	22.8022	17.9694	78.2707	68.7582	78.0701	230.552	164.137	162.156	174.092	230.728	138.288	129.443	191.17	205.295	123.32	90.9991	109.45	35.9956	34.4515	44.3751	66.8606	71.9774	56.3053	75.5411	21.3535	27.3574	27.3909	20.1458	14.4657	69.9134	76.4119	50.8448	42.0093	29.362	27.1905	101.273	81.1124	125.655	103.726	86.2852	35.2017	60.4077	13.3556
mir-181d-AACATTCATTGTTGTCGGTGG	345.145	450.21	378.287	226.762	225.802	137.132	351.255	305.93	406.608	422.563	461.672	721.382	429.484	443.101	405.428	625.771	391.577	163.459	260.87	303.598	258.292	497.262	298.922	144.918	136.947	148.237	203.691	175.894	166.327	215.75	124.938	126.309	133.858	106.508	82.8242	92.6892	123.276	80.2812	13.8285	10.6128	10.3162	123.606	129.951	143.605	178.091	89.3943	34.4195	57.0942	56.0486
mir-103-GCAGCATTGTACAGGGCTATG	119.403	169.532	159.158	202.489	251.087	134.214	72.055	64.7799	114.911	134.98	140.496	250.902	195.086	178.487	130.898	190.339	152.853	179.268	286.868	300.293	158.276	218.738	186.768	78.8032	86.3604	96.1782	48.9792	46.7851	50.0492	56.0835	63.032	61.2186	63.9518	79.2621	65.8486	98.3109	108.159	100.649	51.1235	33.8194	31.8328	96.4084	91.6997	102.362	112.941	62.7059	34.0283	51.9965	26.7113
mir-9-ATAAAGCTAGATAACCGAAAG	6424.3	7900.91	8001.94	7622.79	8381.71	4856.09	7573.34	6546.62	7971.36	9077.28	9376.41	11393.9	9000.09	8791.92	5975.74	8541.91	6869.22	4384.05	7386.17	7974.86	6602.9	10541.7	6781.1	7.01213	7.40607	6.91559	9.58855	8.99716	30.6335	0	4.11398	4.9553	5.59727	3.71541	4.42641	34.8847	28.1734	18.435	4.39999	2.54706	0	7.07586	0	0	17.7877	30.3165	33.8328	25.2336	2.55108
mir-136-ACTCCATTTGTTTTGATGATG	2474.61	3771.52	2961.62	5343.76	4927.94	2094.53	1586.02	1341.15	2871.64	3376.36	3272.81	2538.62	3299.46	2796.63	2271.48	4869.35	2547.09	2104.71	4888.39	4469.16	3062.43	3799.57	2343.43	108.989	90.1958	139.913	37.3175	33.2895	35.1639	31.4755	67.8317	58.1215	75.5036	54.6576	57.7715	21.3343	40.8172	11.4475	8.90473	7.99497	8.17927	36.2638	29.8835	38.2519	45.2194	118.415	32.8549	74.1715	4.5019
mir-376a-ATCGTAGAGGAAAATCCACGT	1771.5	3128.35	2427.44	4066.87	3904.76	1689.78	461.617	415.095	1843.43	1975.7	1914.63	1926.97	2530.79	2141.35	2038.76	3837.67	2105.11	1943.41	4164.84	3763.11	2297.81	2467.5	1780.98	57.4326	54.8844	71.2691	29.2839	18.4441	23.5145	21.7467	36.6341	39.3843	46.6837	31.5396	30.8936	11.8204	18.6907	5.94675	4.6095	4.59887	4.49491	13.0461	7.51355	12.6082	18.2163	50.5275	32.8549	37.2131	4.12674
mir-500-AATGCACCTGGGCAAGGGTTC	83.3868	125.519	111.737	140.091	169.131	84.613	88.8781	74.034	76.5598	84.2455	94.1751	136.863	117.579	110.14	118.819	214.707	145.354	95.8834	173.242	179.515	151.55	183.056	147.6	87.017	75.053	82.4107	35.2444	35.0889	36.8897	41.7766	47.6048	56.1601	54.0673	52.3459	47.6866	170.387	179.898	158.927	48.6092	31.6261	37.654	94.1973	89.6504	103.216	102.654	61.9283	32.6593	53.016	59.5003
mir-434-TTTGAACCATCACTCGACTCC	2149.98	3376.43	2760.23	3538.08	3908.56	2061.51	881.48	775.116	2298.36	2445.26	2559.6	2312.57	2466.69	2279.98	2666.73	4249.97	2975.07	2350.8	4231.73	4247.54	2174.87	3395.89	2390.87	35.261	30.1534	46.4241	15.0307	14.3955	18.337	18.8853	18.9538	18.7889	23.2228	14.6139	15.0133	9.36987	14.5678	5.64942	3.35236	1.98105	2.72642	9.72929	8.87966	12.6082	16.5019	84.2123	32.0727	54.0356	2.92624
mir-135a-TATGGCTTTTTATTCCTATGT	633.274	2311.52	1212.32	697.909	811.436	318.587	319.737	271.878	370.681	463.819	477.624	394.889	354.214	340.522	1985.78	4268.25	1662.56	449.225	971.65	979.161	781.445	1652.15	1038.2	13.4232	11.7704	15.4961	273.92	165.997	192.862	196.292	16.0152	15.4337	17.3873	23.2006	22.8622	3.60378	3.71065	0	0	0	0	5.74915	5.80593	8.54793	10.9298	62.1874	31.8771	15.8029	3.75159
mir-1198-TATGTGTTCCTGGCTGGCTTG	77.0378	124.63	104.738	197.391	250.645	139.304	52.7997	46.9003	70.4294	74.7662	88.0399	128.069	95.5302	86.8542	106.806	148.97	106.492	159.977	265.912	283.106	135.597	131.796	140.204	31.1872	30.484	31.3764	31.8754	40.4872	42.7144	44.6378	32.667	40.6231	33.9409	38.3099	31.5324	56.6516	68.3035	58.7242	30.1712	19.8105	17.5375	43.3397	39.2756	42.5261	41.1475	53.8958	31.6815	42.056	44.0436
mir-32-TATTGCACATTACTAAGTTGC	64.7069	58.5363	87.1209	97.9752	90.9749	48.3592	47.8339	46.1815	67.0077	73.8317	71.3214	74.2823	71.6475	77.6002	50.9411	94.4026	62.3667	30.3061	73.5097	68.5575	115.969	167.89	93.486	244.356	248.236	285.653	136.831	92.2209	110.022	112.739	441.813	423.833	422.415	447.911	401.754	809.555	854.824	742.6	273.741	191.95	212.882	347.602	306.689	373.757	379.542	88.0989	31.486	81.3082	184.728
mir-486b-CCTGTACTGAGCTGCCCCGAG	1.34297	2.81566	1.87032	1.60707	1.81243	0.807022	7.09402	6.0647	1.28313	1.40186	1.53379	0	1.56534	1.11895	1.93655	2.63935	2.12695	0.970251	2.40924	1.84142	1.40758	2.55715	1.58106	1.23547	1.38864	0.992521	89.2771	66.1291	72.8086	92.9957	0	0.929116	1.48864	1.1559	0.684499	9.00944	7.14644	12.5625	4.92379	7.53509	4.60544	15.6996	11.2703	19.0192	16.9305	66.7219	30.7037	42.9481	6.30266
mir-486a-CCTGTACTGAGCTGCCCCGAG	1.34297	2.81566	1.87032	1.60707	1.81243	0.807022	7.09402	6.0647	1.28313	1.40186	1.53379	0	1.56534	1.11895	2.0022	2.63935	2.12695	0.970251	2.40924	1.84142	1.40758	2.55715	1.58106	1.23547	1.38864	0.992521	89.2771	66.1291	72.8086	93.5679	0	0.929116	1.48864	1.1559	0.684499	8.86527	7.28388	12.5625	4.92379	7.60586	4.60544	15.6996	11.0996	19.0192	16.9305	66.9811	30.5081	43.4579	6.30266
mir-1249-ACGCCCTTCCCCCCCTTCTTC	87.7815	100.031	121.993	72.9273	119.178	89.5796	50.4689	46.2713	49.3291	65.6875	85.7392	78.8614	63.5973	74.1526	138.382	205.746	167.416	46.7432	101.86	115.207	168.832	277.172	211.658	2.40416	2.11602	1.98503	13.2166	13.0459	9.70781	6.86736	2.35085	3.25191	1.78636	2.47693	1.96223	7.92833	8.93305	6.98744	4.6095	2.83007	1.84217	7.73922	7.00127	8.33425	9.21533	28.5026	29.9214	29.0568	8.32852
mir-486a-CTCGGGGCAGCTCAGTACAGG	0	0	0	0	0	0	0	0	0	0	0	0	0	0	0	0	0	0	0	0	0	0	0	0	0	0	5.57171	5.3983	6.57974	5.43668	0	0	0	0	0	0	0	0	0	0	0	0	0	0	0	48.5841	29.7258	31.988	0
mir-17-ACTGCAGTGAGGGCACTTGTA	12.2088	16.0048	16.8932	20.1714	23.5173	10.4292	3.85103	5.301	9.97985	12.4166	16.565	31.6173	18.8286	20.5644	15.2955	19.2734	14.2759	13.2411	21.8512	23.7024	17.673	19.8105	16.8816	95.4321	91.7827	97.2668	57.013	36.8885	45.9504	53.7945	104.613	117.792	118.019	107.169	86.9308	93.8422	108.983	92.7691	46.095	33.2534	50.3282	78.0557	72.9157	82.0602	85.9383	52.8592	28.7481	44.3501	80.8843
mir-145a-GGATTCCTGGAAATACTGTTC	6.71487	7.11327	6.87794	10.7507	12.4659	6.26994	4.96581	3.32435	5.27507	7.87717	12.2704	8.72199	7.3347	7.74187	7.94316	11.3553	9.01249	6.79176	10.7575	10.1986	8.91473	14.7549	9.84332	158.875	152.883	176.86	93.553	85.0232	70.975	69.2461	133.851	136.426	187.449	105.105	92.5897	57.5164	57.7213	47.8714	9.74279	6.2969	11.2004	86.0158	81.7954	86.9751	85.7238	43.2719	28.7481	41.8012	19.4332
mir-29b-CTGGTTTCACATGGTGGCTTA	101.456	135.448	138.524	174.117	202.196	110.562	55.1306	45.5526	126.887	146.195	167.49	180.837	136.184	146.309	113.371	175.977	125.238	120.939	204.057	226.258	103.614	165.244	121.078	20.3686	21.9538	23.5001	40.9454	35.0889	35.5953	27.4695	9.59932	11.9753	14.6482	13.5406	9.03535	65.733	66.5169	82.2139	17.7047	12.0278	10.0951	44.2242	32.1034	43.5945	34.7182	39.3854	27.7703	29.3118	4.5019
mir-30a-AAACATCCTCGACTGGAAGCT	8.05785	13.782	10.3772	22.388	25.1087	12.0433	11.1477	9.43396	16.2529	21.7623	19.4793	16.8626	12.6121	10.766	7.48364	11.0484	10.2382	12.7274	20.6186	19.7362	12.2773	18.2233	13.1584	11.954	11.043	13.0627	31.8754	27.4414	25.6717	34.9092	5.68122	5.26501	6.4309	6.27489	7.21002	52.6153	58.8208	53.5207	20.1141	15.2824	19.0849	26.0923	24.7605	31.4135	33.218	43.2719	27.7702	30.841	1.27554
mir-29c-ACCGATTTCTCCTGGTGTTCA	31.743	37.0482	34.6311	54.1969	60.6499	37.3713	22.7008	18.3289	32.3633	36.315	40.6455	47.2442	35.7343	37.8626	29.6062	41.9226	33.743	33.3309	56.0287	63.1747	35.5024	54.1998	41.7195	14.1578	12.1671	14.0873	25.6558	21.1432	25.8875	27.4695	6.80768	9.65249	10.2418	7.01796	4.79147	26.0915	24.6002	24.5304	11.7333	9.62227	7.36871	17.4685	16.2225	16.8822	13.2872	43.2721	27.7702	26.763	2.62611
mir-708-AAGGAGCTTACAATCTAGCTG	754.141	1105.82	869.641	1608.51	1750.18	897.653	112.795	99.8206	954.644	1106.14	1177.34	1068.88	1444.36	1164.37	537.705	667.202	424.022	1017.74	1996.97	2062.76	847.363	464.578	673.224	91.8257	88.0799	110.265	11.4026	28.791	13.3752	13.1625	60.7304	65.0898	88.0081	64.9782	45.9525	98.3109	113.518	74.6318	1.67618	1.27353	0.810552	50.1943	37.2263	38.2519	40.0759	290.467	27.1835	284.706	52.8221
mir-1a-CATACTTCTTTATGTACCCAT	0	0	0	0	0	0	0	0	0	0	0	0	0	0	0	0	0	0	0	0	0	0	0	0	0	0	30.5796	24.7422	22.8674	25.1803	0	0	0	0	0	0	0	0	0	0	0	0	0	0	0	42.7539	26.5968	29.057	0
mir-872-TGAACTATTGCAGTAGCCTCC	78.1365	108.181	108.479	141.753	143.844	72.2596	50.8742	46.6307	74.849	80.3737	90.6473	128.141	107.695	108.567	91.248	135.65	103.969	78.0767	139.736	144.764	105.334	143.317	120.365	40.3363	42.9157	44.8232	39.909	26.5416	26.9661	38.3429	38.5931	35.2548	39.3	30.7139	27.1973	95.2839	96.477	90.5395	18.857	12.5938	13.9268	76.0654	56.6932	77.9999	71.3651	46.1224	26.4014	36.1937	14.4061
let-7g-CTGAGGTAGTAGTTTGTACAG	80.5785	96.9187	93.757	101.522	117.145	67.7277	99.0118	96.1364	97.3752	109.079	120.097	131.193	85.1989	91.2089	70.8972	104.53	80.4643	69.1161	112.842	123.8	80.3887	146.904	91.446	23.9747	21.9538	27.2782	65.3056	51.7337	54.148	50.3608	18.513	20.802	22.1508	20.2283	16.4735	70.7784	77.6489	78.0511	26.8189	15.4239	15.9164	51.3	40.8122	54.2795	53.792	52.3412	26.2056	29.057	18.0076
mir-1843b-CATGGAGGTCTCTGTCTGACT	155.297	207.026	194.514	220.222	222	116.894	65.6702	60.5571	218.559	238.452	264.58	218.05	175.63	195.966	150.132	229.807	150.185	124.991	225.907	238.346	137.474	238.432	141.887	19.2333	17.3249	18.7617	21.2503	19.3438	18.5527	28.614	12.293	15.2272	13.5764	11.4764	13.2793	45.9842	48.7883	40.4379	29.7522	23.0651	28.2958	36.0427	37.9093	43.3806	43.719	44.8267	25.8146	34.6643	17.1823
mir-142a-ATAAAGTAGAAAGCACTACTA	1.0988	1.33373	0.965331	1.88414	1.85663	1.05534	0	0	0	1.46862	1.68718	1.67171	1.83368	1.27015	1.31291	1.41174	1.6583	0.8561	1.68086	2.0775	2.18958	1.88111	1.22404	15.1595	7.67062	12.9347	12.6983	13.9456	14.0224	16.0239	27.1817	93.6345	34.5364	34.7596	35.1375	10.3789	13.6057	14.1235	11.419	7.85343	9.80037	50.6366	52.4242	52.5699	55.5062	36.5353	25.8146	64.4859	350.323
mir-136-ATCATCGTCTCAAATGAGTCT	1110.03	1730.74	1359.78	2230.71	2054.23	938.75	575.729	512.849	1299.23	1509.75	1475.21	1188.3	1365.55	1245.11	1150.37	2194.03	1272.43	1017.62	2143.33	2072.87	1210.6	1823.98	1038.2	31.1873	28.9631	44.247	24.1009	19.7938	15.964	18.8853	21.4515	18.1694	24.1755	20.0632	18.0707	6.63097	11.5443	4.60873	3.66665	3.25458	2.35798	13.4884	8.87968	12.8219	12.43	75.6613	25.8146	45.3695	2.47605
mir-196a-TCGGCAACAAGAAACTGCCTG	0	0	0	0	0	0	0	0	0	0	0	0	0	0	0	0	0	0	0	0	0	0	0	0	0	0	0	0	0	0	0	0	0	0	0	13.4061	12.9186	15.6102	0	0	0	0	0	0	0	41.1993	25.619	21.9201	0
mir-93-AAAGTGCTGTTCGTGCAGGTA	16.2377	19.7096	22.4438	31.2546	34.1266	18.872	11.4517	9.79338	16.1104	16.6889	23.1603	34.3065	20.4388	21.895	16.1489	24.4907	22.8557	17.9211	30.3676	37.395	29.4029	37.7987	31.5701	72.5922	69.4318	76.0715	43.0189	35.9886	34.9482	50.3608	57.7428	78.8722	72.4072	69.6842	51.2003	52.9036	67.0666	72.1044	31.7427	27.4517	32.3486	56.1647	46.789	66.4603	65.3645	40.6808	25.2279	30.0764	43.5184
mir-30c-TAAACATCCTACACTCTCAGC	21.8539	26.6747	25.4604	44.2218	52.958	26.3833	27.9707	21.3836	30.2247	38.9852	38.0383	40.6299	30.8147	30.8465	23.2385	33.1451	29.7774	26.5964	54.7961	50.1433	30.8105	48.5564	34.1712	20.1014	18.9781	21.8354	66.6014	49.9341	60.4042	89.2757	10.7258	13.6787	12.2663	12.715	10.9063	110.564	101.974	99.6083	23.257	19.1737	21.9588	36.0427	28.1759	33.337	36.8613	43.5311	25.0324	29.5666	4.42687
mir-144-GGATATCATCATATACTGTAA	3.41849	2.66748	2.89598	5.31993	5.30466	2.54522	2.63492	2.06649	4.13451	4.00534	4.44801	3.77953	3.48846	2.66127	2.56019	3.62143	2.9561	2.22587	3.58584	3.77727	3.36256	6.64269	3.62113	2.20381	3.30629	2.62536	187.366	80.9743	212.492	287.856	2.30188	3.35516	2.38181	2.88976	6.93625	63.5708	74.6253	115.218	44.4188	78.1807	60.497	109.897	86.7475	162.625	180.449	34.9805	25.0323	32.1155	70.5298
mir-28a-CACTAGATTGTGAGCTGCTGG	9.03459	13.782	9.41195	11.5265	11.0514	6.26994	17.9377	17.2507	8.12646	8.94524	12.4238	25.8752	16.3242	15.0604	12.1445	17.1251	14.7084	8.21857	15.1277	15.7702	10.5569	17.6355	14.4845	90.2223	86.8893	96.1139	62.7142	61.1807	58.8942	61.8064	62.2486	68.4454	68.4772	67.7851	53.117	75.9678	95.3775	59.0215	65.0567	32.4751	35.0013	60.366	52.9365	63.4684	67.2934	63.2237	24.6412	44.6048	32.7889
mir-23a-AATCACATTGCCAGGGATTTC	24.662	21.3398	18.9445	35.9095	36.6906	20.7342	10.5396	8.26597	29.9396	39.7864	47.8545	33.4344	26.4765	24.4957	18.5777	23.0176	20.4043	17.5216	35.7463	36.5451	24.3982	39.7975	28.765	98.6374	98.7257	107.512	118.69	83.6736	77.4468	108.733	51.4249	49.9143	63.4754	45.9883	39.1075	85.0492	85.6199	71.807	22.3141	18.6077	20.6323	167.167	141.391	186.773	160.732	69.4425	23.8589	36.7035	16.7321
mir-1a-CATACTTCTTTATATGCCCAT	0	0	0	0	0	0	0	0	0	0	0	0	0	0	0	0	0	0	0	0	0	0	0	0	0	0	16.5856	15.745	13.8066	10.8733	0	0	0	0	0	0	0	0	0	0	0	0	0	0	0	43.013	23.4678	28.802	0
mir-351-TCCCTGAGGAGCCCTTTGAGC	37.1149	55.7206	54.2995	34.5795	26.258	16.637	7.09401	8.44565	31.6505	28.4379	30.0624	35.6149	27.684	24.7982	43.1293	41.186	28.3354	23.5714	34.5137	38.7171	30.0285	31.0385	29.683	26.7796	24.5988	30.6079	70.4887	58.9314	54.148	74.3966	17.3375	18.7372	19.2927	21.7144	24.3225	200.515	223.739	185.985	47.5616	32.6166	36.475	295.859	283.467	349.397	382.544	49.7498	23.2722	34.6643	32.7138
mir-671-AGGAAGCCCTGGAGGGGCTGG	95.3515	171.904	140.696	125.906	113.608	62.6373	36.0782	29.7395	103.363	73.5647	102.151	149.001	137.66	128.83	113.83	190.156	109.521	71.7412	140.183	148.446	104.552	124.742	91.446	43.7423	37.361	39.5086	41.9822	35.9886	33.6537	33.7647	22.1372	29.3705	29.5345	27.494	25.2351	69.3369	82.3216	81.1728	37.8188	26.4612	29.3274	55.5013	51.3996	59.4081	60.6497	35.4986	23.2722	27.7824	17.6325
mir-3102-GAGCACCCCATTGGCTACCCA	49.9341	92.0278	78.9153	167.356	196.449	97.6495	23.4103	20.3055	61.5901	67.156	77.4566	121.817	99.466	111.229	89.7378	149.645	112.693	103.474	177.051	173.187	87.1139	118.863	104.962	6.14395	5.48844	4.9946	44.3146	27.8912	34.5167	43.4934	2.00802	2.01309	2.73909	2.06411	1.36899	17.154	20.7522	11.2988	0.628569	0.566017	0	23.66	16.564	21.3699	14.1445	25.9115	22.8811	21.1555	0.975412
mir-199a-CAGTAGTCTGCACATTGGTTA	0	0	0	0	0	0	0	0	0	0	0	0	0	0	0	0	0	0	0	0	0	0	0	21.2144	20.7745	25.0797	42.6732	33.1395	35.9908	43.4934	16.3743	19.9416	21.3967	18.4669	18.1468	26.4758	23.8216	23.0932	9.07928	5.77808	9.16175	58.6705	64.8898	72.5862	81.8663	41.6309	22.5551	26.3381	9.34145
mir-33-GTGCATTGTAGTTGCATTGCA	53.2306	76.6159	65.5215	151.84	139.07	69.4039	46.7192	34.2319	65.1543	82.3764	84.8189	71.9565	65.8781	69.4349	43.1949	91.7019	47.6583	58.1009	133.685	134.187	89.6947	103.52	74.9726	63.5766	55.4135	64.7376	51.5707	48.1347	33.8696	32.0477	62.6896	66.8967	63.1181	57.3823	53.7101	60.9761	73.8009	64.0762	58.8759	38.206	41.3384	86.016	76.8433	93.6	106.941	49.2318	22.49	44.35	110.297
mir-1839-AGGTAGATAGAACAGGTCTTG	68.1254	116.035	103.049	79.134	95.8375	51.2769	23.8156	20.4852	60.3069	58.8784	66.5667	122.399	100.852	99.4345	70.3721	114.536	66.2602	61.4682	109.256	108.88	67.6422	89.8822	71.0965	32.2557	32.7322	35.7947	17.3631	14.8453	18.5527	20.6021	19.3456	26.4799	24.6518	27.4939	26.0108	56.6516	61.0197	60.8055	38.1331	24.1972	27.1168	46.6565	38.0801	50.8602	48.4339	37.8308	22.2944	29.8216	33.2391
mir-101a-TCAGTTATCACAGTGCTGATG	28.3245	30.9723	30.0458	54.4185	60.4731	29.8598	52.3943	45.4628	32.2207	39.9198	42.3328	44.5548	39.4911	39.3142	20.941	37.135	24.442	23.4572	52.6671	59.9642	37.5356	48.3212	35.1403	16.0277	14.0848	21.259	29.0248	33.2895	24.8089	34.3369	17.4355	16.6725	20.1264	14.779	13.4618	84.1844	86.9942	73.1451	29.4379	20.3765	24.243	42.4551	40.983	45.3041	42.219	50.5273	21.9033	26.7628	7.87833
mir-574-TGAGTGTGTGTGTGTGAGTGT	8.91248	13.041	11.2219	3.54662	7.60333	4.22135	3.24297	3.05481	7.27104	6.67556	10.89	8.57664	8.90003	6.41124	7.22103	12.5829	7.28211	4.62296	7.95609	7.64897	6.88152	13.403	11.0164	86.6167	91.5182	98.9958	37.3175	51.7337	47.8919	51.5053	26.7899	37.4228	36.2037	21.3016	22.8622	21.0461	24.4629	15.3129	18.5427	12.3816	13.0426	93.313	88.1136	105.353	120.871	48.7135	21.9033	37.2133	19.0581
mir-365-AATGCCCCTAAAAATCCTTAT	1.95342	0	0	8.97738	9.81362	5.58707	0	0	2.13855	3.07075	4.14124	2.54392	2.0573	2.23787	2.49454	2.70073	2.45141	3.0249	6.83551	6.2325	4.22276	4.93793	4.08015	6.01039	4.56268	7.61997	5.18298	4.04874	3.88312	5.1505	2.39983	2.73575	4.52547	1.81642	3.23995	21.3345	22.5388	18.435	10.7905	6.86291	7.00026	11.4983	10.9288	11.5397	13.5015	28.7617	21.3166	26.2532	0
mir-9-CTTTGGTTATCTAGCTGTATG	4033.93	5097.24	4737.33	5047.73	5136.15	2654.86	4117.47	3677.72	4627.09	5429.23	5512.15	7591.19	5871.41	5648.36	3394.55	4887.47	3664.13	2839.52	4844.12	5532.38	3964.93	5726.25	3924.94	7.27925	7.86895	9.73303	8.55197	8.99716	14.0224	0	3.91809	4.90368	7.14544	4.29336	5.2478	35.1731	36.969	24.233	1.78095	1.55654	0	0	0	0	7.28651	18.9154	21.3166	15.2931	0
mir-331-GCCCCTGGGCCTATCCTAGAA	62.7536	92.0279	87.362	98.3079	101.407	56.3052	39.6251	33.1537	55.6021	56.3417	58.591	107.499	85.1989	84.5557	84.8147	121.656	87.8903	57.3589	99.7311	110.107	78.5902	116.101	83.49	13.49	15.5396	15.2399	54.6806	36.4384	37.5369	36.0537	12.244	10.9429	15.0055	11.3113	11.3627	28.6861	33.3958	34.0451	12.2571	8.77323	9.5793	39.8018	35.8602	48.0822	41.7904	34.2031	21.121	25.4884	12.4553
mir-9-TAAAGCTAGATAACCGAAAGT	3916.11	4855.1	4531	4989.08	5546.09	3064.57	4349.23	3788.24	4749.57	5409.74	5504.34	7824.58	5568.61	5630.22	3132.09	4101.36	3288.71	2979.13	5285.75	5601.4	3708.99	4773.21	3611.99	18.5654	16.7959	22.0915	19.9546	17.5445	24.5932	12.5902	12.293	12.1301	14.7673	9.90771	10.2675	61.6969	67.8912	51.2908	0	1.83955	0	0	0	0	12.2156	19.1745	20.5343	13.5089	0
mir-20a-AAAGTGCTTATAGTGCAGGTA	8.79038	4.74218	9.41195	9.4207	13.1732	6.51825	3.34432	3.05481	7.12848	7.61014	7.05546	11.1932	7.73722	8.04429	5.97377	10.1278	8.86833	4.90832	10.4213	10.7652	12.6683	16.107	13.2605	51.2219	47.809	56.2212	30.8388	32.3898	27.182	45.2103	66.3628	76.4971	71.5737	70.097	55.5355	49.2998	59.233	50.8448	33.3141	25.1877	37.0645	43.3397	37.9093	52.9973	56.3635	39.3856	20.3389	36.1937	57.6992
mir-200a-TAACACTGTCTGGTAACGATG	237.462	12.3	36.441	9.30988	6.454	12.9744	1.82417	2.15634	3.2791	8.14418	17.6387	39.9031	7.82667	18.5684	4.66085	4.17385	14.1316	3.36734	7.84402	12.0873	4.06636	5.99606	16.1165	27564.8	28860.2	33253.6	17.3631	110.665	61.6986	45.7826	17438.7	13997.1	16764.2	15803	12988.3	15263.6	16006.1	13326.7	284.008	181.124	211.334	5246.75	4547.75	5424.93	5429.74	669.292	20.3387	244.69	118.175
mir-215-ATGACCTATGATTTGACAGAC	0	0	0	0	0	0	0	0	0	0	0	0	0	0	0	0	0	0	0	0	0	0	0	3105.11	3659.4	3539.89	5.96043	108.416	7.98198	10.3011	15780.8	9349.72	10453.2	44310.3	39617.2	0	0	0	1.3619	0.778271	2.57904	97.9564	1.70762	2.99179	3.64327	2.85026	20.1431	205.948	0
mir-340-TCCGTCTCAGTTACTTTATAG	71.4218	109.218	90.8613	80.1315	88.0574	51.6494	52.7998	54.5374	76.845	82.6434	90.3406	79.0794	63.7315	63.2656	71.3572	100.111	70.5859	43.7754	75.9749	95.6593	70.5355	123.977	72.7287	25.3104	26.9132	31.1202	32.3937	27.4413	24.3774	27.4695	19.6394	20.5955	20.4836	18.2468	19.4397	39.3533	47.2765	37.3159	27.4474	17.6172	16.0638	28.9668	26.8098	26.926	33.218	29.798	19.9477	21.9201	25.961
mir-30e-TAAACATCCTTGACTGGAAGC	20.8771	27.4157	25.4604	32.8063	37.6632	18.7477	14.3907	14.6451	23.0963	26.8358	28.6821	31.1811	27.5052	25.2215	17.9869	27.621	23.2163	20.5465	34.2896	35.8842	26.9005	41.3846	25.603	25.3104	23.4085	24.973	104.437	80.0746	83.0559	119.607	20.1291	20.389	22.5082	24.7693	23.4554	115.177	117.229	113.88	22.838	18.7492	19.0113	23.2177	21.5161	24.3616	26.3601	41.1991	19.9477	24.7238	9.75412
mir-369-AATAATACATGGTTGATCTTT	1644.17	2977.05	2160.16	3135.89	3051.59	1442.15	367.773	319.497	1500.26	1471.3	1458.17	1615.09	1917.98	1563.98	1879.51	3261.67	2009.58	1815.28	3508.62	3465.37	2138.44	2475.96	1668.93	36.6634	31.013	45.9759	13.9941	16.6448	16.827	13.1625	24.0963	22.5054	26.2	17.0083	20.8543	6.63097	11.1319	2.82471	1.25714	2.19331	2.35798	7.29698	7.17203	8.97533	13.2872	41.1993	19.9477	25.9982	3.0763
mir-674-GCACTGAGATGGGAGTGGTGT	223.178	230.44	235.66	463.72	563.797	332.866	140.968	122.282	342.88	355.273	375.627	264.204	217.268	192.095	185.187	233.797	213.201	320.182	493.726	498.221	354.32	373.754	349.158	60.3042	66.7209	71.6533	57.7903	55.3324	60.4042	61.234	43.3438	53.4759	49.7799	48.7131	39.2444	93.41	99.0887	76.7132	38.3427	18.1125	20.4113	155.669	133.708	157.068	146.159	38.8671	19.1654	25.2336	21.1589
mir-501-AATGCACCCGGGCAAGGATTT	53.2306	68.0206	70.1068	64.8366	84.521	42.6479	27.1599	26.4151	45.3371	46.8624	51.0754	79.879	67.846	55.7656	78.775	116.438	82.0503	54.3341	95.8092	93.6762	71.865	97.9946	84.7139	37.064	34.4515	32.657	18.3996	14.8453	17.6898	16.5962	23.5085	28.4414	27.1527	26.6683	29.4789	78.4184	86.8568	88.4581	17.9142	14.5041	14.8111	43.1186	42.0077	55.3479	41.5761	38.8671	18.9698	27.0178	31.0631
mir-133a-GGTCCCCTTCAACCAGCTGTA	0	0	0	0	0	0	0	0	0	0	0	0	0	0	0	0	0	0	0	0	0	0	0	0	0	0	22.8052	15.2952	16.1797	14.8793	0	0	0	0	0	0	0	0	0	0	0	0	0	0	0	39.9036	18.9698	30.0764	0
mir-92a-ATTGCACTTGTCCCGGCCTGT	12.9414	9.63258	13.3938	13.189	15.0299	11.4225	4.2564	3.95328	8.12646	10.2804	9.81629	13.5917	9.43672	11.0684	11.685	12.8898	13.4107	6.73467	13.5589	14.3536	19.3152	29.51	26.062	88.4199	84.509	93.2963	42.2414	40.9372	34.0853	38.3429	101.772	121.25	113.97	120.049	92.909	61.1202	72.289	67.1983	63.7997	48.6773	67.4969	50.4156	48.6674	58.3397	59.3639	44.3085	18.7743	30.5862	55.5235
mir-451a-ACCGTTACCATTACTGAGTTT	1.58715	1.77832	3.37864	2.99245	3.80167	2.29691	2.43223	1.07817	3.70681	3.87183	5.06152	3.34343	3.08594	2.23788	2.4289	3.06901	2.30721	1.59806	3.13761	4.06057	2.58057	6.05485	3.97814	1.8699	2.44665	1.66486	158.34	70.1778	163.091	243.792	2.15495	3.09706	2.02454	3.13745	4.33515	48.5791	60.47	88.9042	29.1237	57.7336	43.6226	90.6595	74.2817	124.586	131.372	25.6523	18.5787	22.4299	44.869
mir-411-TAGTAGACCGTATAGCGTACG	181.301	265.413	226.851	610.129	579.357	270.786	56.5494	52.0216	222.266	242.456	236.971	266.239	239.675	238.547	175.34	288.303	186.884	341.015	610.041	582.266	249.143	161.599	203.752	24.2419	20.1684	28.0466	23.5827	24.7423	17.9056	20.0298	17.1906	14.0917	18.2209	14.3662	13.4618	4.18039	8.52076	3.56805	3.14284	1.9103	3.02117	11.056	7.00128	12.1808	13.7158	54.9323	18.5787	28.547	1.72573
mir-203-GTGAAATGTTTAGGACCACTA	20.3888	27.1194	19.0651	12.0807	18.8315	11.9191	7.49939	6.28932	27.9437	41.6555	38.805	16.8624	14.7588	17.7216	13.9169	18.6596	13.4106	6.84883	16.2483	18.2252	11.0261	40.738	20.4007	188.192	238.318	255.493	34.2078	44.5359	35.1639	34.3369	872.803	786.6	816.13	866.679	686.913	211.326	235.558	291.54	251.322	260.155	205.292	158.986	130.804	154.718	510.272	993.185	18.1876	414.951	19.3582
mir-15a-AGCAGCACATAATGGTTTGTG	21.3655	18.5242	15.6866	50.761	52.2508	28.6803	17.5323	18.9578	26.6605	26.8357	30.2158	30.4543	21.3333	26.6731	18.1839	23.7541	22.3511	18.8913	39.1081	41.8333	38.1612	47.1455	41.8725	54.0268	48.2718	54.1081	47.4244	26.5416	36.0268	50.3608	62.1507	61.1154	65.619	57.8776	49.7401	91.8248	98.2636	107.042	91.0376	68.2048	73.9078	74.9598	68.3052	85.052	87.8671	37.0534	17.992	33.6447	38.3412
mir-203-TGAAATGTTTAGGACCACTAG	19.9005	24.0073	13.8766	9.42072	11.9355	7.20113	4.96581	4.76191	22.5259	33.5113	32.8233	12.6469	11.7177	13.2458	11.8163	13.9333	9.94985	6.56345	10.8696	17.4698	9.07106	33.0371	14.4846	201.882	249.757	265.994	29.0248	34.6391	27.3977	26.8973	961.797	824.386	843.878	943.214	708.134	201.812	205.323	268.049	219.895	211.407	175.596	142.181	112.362	133.562	436.551	741.067	17.7964	306.116	16.2069
mir-20b-CAAAGTGCTCATAGTGCAGGT	1.34298	1.63012	2.77531	14.6298	14.7647	6.33201	2.53357	1.88679	2.70882	3.87182	3.68111	2.90734	1.52061	1.33064	2.2976	3.86695	2.3793	3.48149	6.16316	3.68284	5.08295	2.7041	7.85428	5.00866	3.76918	5.1867	2.85064	6.74787	3.6674	4.57826	248.064	238.319	219.008	62.4187	30.4829	127.574	152.824	107.339	3.2476	2.40557	2.35798	22.7754	20.833	17.9506	24.217	28.5026	17.7964	37.2133	103.394
mir-19b-GTGCAAATCCATGCAAAACTG	13.9181	14.8193	10.8599	21.1689	21.1302	12.0433	7.09402	3.68374	8.83935	13.8852	11.3501	22.0957	14.8483	15.0604	11.3567	16.5727	12.4734	8.67516	16.1363	16.9978	18.2985	22.1032	20.5027	82.8099	85.9633	95.6021	60.1228	52.1834	52.6378	60.0895	89.2344	103.958	91.9381	93.6282	82.733	103.356	115.717	90.3906	57.933	49.668	81.277	86.4581	74.6233	87.189	110.37	51.0455	17.6008	32.6253	66.4031
let-7i-CTGCGCAAGCTACTGCCTTGC	34.1848	37.9374	34.3898	82.7915	67.0156	31.2876	35.9767	34.142	45.9074	47.53	52.916	62.8711	48.0781	59.8785	22.8447	39.1605	27.1818	25.4548	66.5622	61.9473	45.8247	53.847	34.9873	20.1014	17.4572	19.9144	50.7934	40.0373	41.6358	41.7766	17.3865	21.06	20.1264	17.7513	17.4775	29.2627	28.998	33.1531	10.0571	7.57045	9.87406	56.6069	46.6183	58.5533	54.2204	40.4219	17.6008	21.4103	15.0814
mir-29c-CTAGCACCATTTGAAATCGGT	15.8715	20.1543	24.2538	34.6904	39.8733	16.6371	11.4517	9.97307	22.3834	25.6341	28.3751	27.1836	27.0132	28.1853	18.6434	32.4701	20.909	15.4099	31.3761	35.6952	21.4266	32.3317	22.2878	5.94361	5.22393	6.91559	22.5459	19.7938	18.1212	25.7528	5.04454	4.18103	5.47818	4.12822	4.10698	17.2982	12.5063	25.7198	4.29522	3.74985	3.53697	13.7095	10.7581	12.3945	13.2872	26.1706	17.2097	20.1359	2.10089
mir-199b-CCAGTGTTTAGACTACCTGTT	0	0	0	0	0	0	0	0	0	0	0	0	0	0	0	0	0	0	0	0	0	0	0	22.0381	20.3667	21.7713	31.8754	19.3438	23.5145	29.7585	13.1255	12.0785	15.2437	11.1462	11.4539	10.8113	11.2694	13.6775	1.15238	1.48579	1.10531	53.0691	54.6441	57.0574	72.6511	32.1302	17.2097	21.4103	2.92624
mir-140-CCACAGGGTAGAACCACGGAC	23.0747	34.9735	33.907	34.9121	31.3858	19.4927	27.1599	24.708	18.6766	24.032	29.2956	39.2491	33.677	33.9916	30.0002	42.5978	34.4639	19.9187	36.0825	39.7558	30.4195	51.7308	36.2112	24.3087	23.0118	28.6229	73.5984	72.8769	61.6986	77.2578	23.5085	22.7118	25.009	24.7693	20.6262	72.2199	71.0521	75.6724	21.8951	13.5844	14.0006	57.7125	54.8149	59.8356	60.4353	28.7617	17.0141	18.0967	19.4332
mir-326-CCTCTGGGCCCTTCCTCCAGT	222.201	346.179	306.733	415.064	445.592	197.968	110.768	100.18	248.784	279.839	313.508	301.855	251.304	255.18	265.8	531.061	316.592	242.848	474.339	459.222	275.808	278.935	263.526	34.1256	34.9144	39.1883	27.4698	22.4929	23.9459	30.9032	35.8505	35.513	40.8482	37.154	32.9471	92.8335	100.188	89.6474	17.3903	11.1788	10.5372	181.761	157.614	188.268	185.807	26.4295	17.0141	25.7434	45.6943
mir-328-TGGCCCTCTCTGCCCTTCCGT	75.9391	123.444	109.444	89.2197	103.883	62.9477	59.9951	58.85	83.403	78.371	97.8562	130.176	106.711	109.959	91.9696	116.193	79.8151	75.6224	116.204	131.071	70.1447	98.7587	78.0328	3.80658	5.81907	4.41829	23.0643	22.0431	18.9842	19.4576	1.71416	3.35515	3.09636	2.97232	2.00786	18.1631	18.1409	16.9483	5.97138	2.90082	3.31591	13.4884	14.3441	17.5232	14.5731	22.8021	16.8187	16.5675	3.75159
mir-186-AAAGAATTCTCCTTTTGGGCT	30.0338	44.0133	39.699	50.9826	51.8088	31.1634	22.0928	16.3522	31.3653	40.4538	38.6517	54.2218	40.3857	43.6085	32.8229	44.3778	34.1756	28.708	55.5806	56.187	38.7085	52.5538	38.0474	24.1084	21.1602	24.0125	30.8388	20.2435	26.1032	28.0417	20.2761	19.2534	20.2454	19.9806	16.3823	34.8847	38.206	35.6805	16.3428	11.1788	11.7162	29.8513	26.2975	36.5424	31.7178	23.0612	16.8185	25.2336	13.4307
mir-338-CCAGCATCAGTGATTTTGTTG	216.219	164.049	247.968	388.465	419.244	248.066	131.239	125.427	185.198	187.984	222.247	217.615	183.502	230.563	239.541	347.044	319.044	122.251	289.221	328.718	528.157	799.064	553.319	11.019	9.19146	11.3339	12.9575	11.2464	10.7865	12.0179	8.03207	7.7943	10.7182	9.24723	10.9519	14.9918	11.1319	9.96083	6.8095	4.45737	6.2634	28.9668	20.15	32.4821	28.0747	29.28	16.4275	36.4485	6.22763
mir-133a-AAAGCTGGTAAAATGGAACCA	0	0	0	0	0	0	0	0	0	0	0	0	0	0	0	0	0	0	0	0	0	0	0	0	0	0	5.44215	4.04872	7.98197	4.57826	0	0	0	0	0	0	0	0	0	0	0	0	0	0	0	18.138	16.4275	16.8224	0
mir-182-TTTGGCAATGGTAGAACTCAC	8.79038	10.8181	115.236	7.09325	6.71923	7.57357	25.4371	12.6685	3.56424	4.27236	8.89602	3.63416	2.23619	5.14109	3.08535	3.069	8.14737	4.05222	6.38727	10.1042	2.50237	5.40821	3.16211	1838.38	1856.35	1865.8	3.10979	11.2464	5.82468	4.00596	1522.96	1371.84	1432.07	1047.99	707.633	348.991	414.769	283.214	73.5426	44.4321	110.678	330.134	298.664	417.139	371.399	125.929	15.8408	71.6226	16.3569
mir-196a-AGGTAGTTTCATGTTGTTGGG	0	0	0	0	0	0	0	0	0	0	0	0	0	0	0	0	0	0	0	0	0	0	0	10.418	12.4978	12.7426	0	0	0	0	2.2529	4.80045	7.62181	0	0	18.8838	18.0037	13.8262	0	0	0	0	0	0	0	26.6889	15.8408	18.0969	0
mir-148a-CAGTGCACTACAGAACTTTGT	13.1856	26.082	21.8405	43.1137	41.3764	21.1067	3.24297	3.14465	8.4116	12.1495	9.66291	20.9328	19.0523	15.7257	13.2605	28.7873	13.4827	25.4548	46.728	46.8382	17.4383	12.4624	16.8306	391.944	301.6	373.442	89.6657	103.917	80.8985	117.89	193.357	195.787	211.862	178.339	227.162	24.0733	29.4104	14.5695	559.216	334.94	566.581	39.5807	33.4695	43.3808	47.1483	46.1222	15.6452	40.5266	82.0845
mir-1247-ACCCGTCCCGTTCGTCCCCGG	16.2377	13.782	33.3037	10.529	5.6583	4.59382	5.26983	5.4807	0.855418	1.20159	1.68717	3.99758	33.6324	4.77819	7.94316	5.95387	5.76802	4.62296	7.95608	9.25431	9.14927	3.58588	4.53916	1.60277	2.90954	5.50686	6.47875	5.39828	8.41344	5.15053	0	0	0	0	0	30.2718	34.083	24.8277	24.6189	2.75932	4.05278	4.42242	6.83051	9.61644	8.57238	10.8828	15.2541	12.4894	3.82662
mir-378a-CACTGGACTTGGAGTCAGAAG	0	0	0	0	1.59139	0.931176	0	0	0	0	0	0	0	0	0	0	0	0	0	0	0	0	0	5.40935	5.68681	6.14721	10.6251	13.9456	12.9437	15.4516	2.79163	2.37441	4.52546	3.79796	2.73798	8.50492	9.07049	8.47414	2.19999	1.27353	1.03162	0	0	0	0	17.6198	15.2541	15.548	0
mir-574-CACGCTCATGCACACACCCAC	12.3309	14.9675	15.5658	16.5139	16.8865	10.8017	7.09402	5.1213	12.1184	13.7517	15.7982	15.0454	13.0146	12.762	14.4421	18.7823	14.4201	8.96054	18.1533	19.0753	13.6849	25.3363	21.4717	60.4378	52.7684	61.2799	52.6074	45.4356	42.0672	58.945	32.1283	29.8866	34.4173	24.439	19.9417	38.4885	39.4428	32.8559	35.9331	26.8149	26.3063	56.8278	48.1552	56.8439	54.8633	22.8021	14.8629	17.8419	11.1797
mir-338-AACAATATCCTGGTGCTGAGT	310.349	214.287	353.791	480.456	566.98	365.519	179.884	180.414	257.909	236.715	298.783	268.493	225.453	267.216	339.192	447.585	447.094	171.849	388.952	432.687	757.281	1158.12	825.923	12.889	10.3156	13.7671	11.9209	7.19772	11.4336	9.15652	7.88512	7.63943	8.21727	10.3205	8.30523	10.8113	10.9945	9.06877	6.18094	5.02339	7.58979	27.6401	23.2237	27.5672	33.0036	32.6483	14.8629	31.3508	3.82662
mir-29c-GACCGATTTCTCCTGGTGTTC	28.6908	48.0145	37.2857	56.5243	67.9881	33.7707	22.5995	21.6532	33.0761	38.0507	38.3449	60.1091	48.1228	47.9633	41.2912	68.1319	44.2696	35.6139	69.5877	69.2185	41.6019	59.843	42.0255	7.81351	7.07549	8.38833	6.21958	8.99716	9.49208	10.3011	4.65273	4.90368	5.1209	3.22001	3.69629	19.6046	16.9041	22.7463	4.92378	3.53759	3.02117	19.9009	14.5148	13.6767	16.9305	18.9153	14.8629	18.6065	2.25095
mir-700-TAAGGCTCCTTCCTGTGCTTG	36.8708	83.729	66.2454	166.912	196.361	99.4501	127.794	111.86	30.6525	34.5793	38.3449	50.5876	36.271	37.0158	82.32	137.614	111.251	98.5088	173.016	181.214	104.865	133.265	118.426	33.4579	27.9051	36.371	33.4302	30.5903	25.8875	37.7707	15.0357	16.8274	20.2454	12.4672	10.8607	34.5964	38.0686	29.1391	4.19046	2.90083	3.68435	29.188	27.3221	30.1316	25.5028	17.3607	14.6674	16.5675	12.1551
mir-376c-AACATAGAGGAAATTTCACGT	153.954	221.103	174.482	288.273	300.952	150.354	83.8108	74.8431	185.768	192.657	183.288	239.999	190.926	184.837	131.883	176.1	116.874	196.276	321.829	298.594	175.557	173.24	137.501	17.6972	16.3331	25.037	11.9209	14.8453	17.2584	22.3189	9.64829	11.5107	11.6709	8.33898	8.67026	3.8921	7.83361	3.41938	1.99046	2.33481	2.21061	9.72931	9.39196	13.6767	13.7158	40.681	14.6674	22.4299	2.10089
mir-193b-ACTGGCCCACAAAGTCCCGCT	2.93013	1.92652	1.44799	41.3403	40.4922	23.4036	1.31746	0	5.70278	5.34045	7.97574	2.90734	1.8784	1.45161	2.49455	4.11247	3.82132	19.8615	32.1605	30.5014	13.5285	9.11168	10.1494	1.33564	1.25639	2.17713	6.99704	4.49859	3.02021	4.57826	0	0.67103	1.07182	0	0.730128	5.91021	6.32186	5.20341	0.733331	0	0	0	1.3661	2.35069	2.35741	15.2878	14.6674	16.0577	0
mir-146a-GAGAACTGAATTCCATGGGTT	10.4996	13.1892	12.6699	20.1714	22.4564	10.8638	3.04029	2.87511	16.9658	17.0895	17.0251	14.7548	12.2991	11.9152	11.5537	13.074	13.3386	12.4421	18.1533	19.9251	16.109	20.8686	19.0747	49.0848	24.731	27.9185	27.7291	23.3926	26.9661	36.0537	48.3883	91.8282	64.7854	46.9792	60.2356	38.7768	48.9257	50.9934	25.6665	22.2161	23.8745	113.656	125.681	132.279	144.23	20.7292	14.6673	25.2336	152.089
mir-1843a-ATGGAGGTCTCTGTCTGACTT	48.4691	66.2423	59.9709	82.348	84.7419	41.1271	18.9005	15.3639	77.1301	86.3148	92.2579	72.9741	60.9585	65.9572	40.602	64.5413	44.3056	43.8896	81.2418	82.911	48.6008	85.1501	43.7851	6.87855	6.11664	8.03616	11.7913	10.7966	9.92354	12.0179	4.77517	5.23921	5.895	4.66489	4.38078	21.2623	20.546	20.9623	19.3809	13.832	14.3321	13.4884	10.3312	11.2192	12.5371	19.6927	14.5696	15.6754	6.1526
mir-1843b-ATGGAGGTCTCTGTCTGACTT	48.347	66.2423	59.9709	82.1264	84.2114	40.9408	18.9005	15.3639	76.9875	85.9142	91.6445	72.9741	60.6007	65.7152	40.405	64.48	44.2335	43.6613	80.5694	82.1556	48.3661	85.0913	43.3771	6.81177	6.11664	7.97213	11.7913	10.7966	9.92354	12.0179	4.77517	5.23921	5.895	4.66489	4.38078	21.2623	20.4086	20.9623	19.3809	13.832	14.2584	13.7095	10.3312	11.2192	12.5371	19.6927	14.5696	15.6754	6.1526
mir-30c-TGGGAGAAGGCTGTTTACTCT	4.02892	3.40845	3.8613	10.8615	10.3441	5.58707	5.47252	5.39084	6.70078	5.87449	7.66897	6.68686	5.85882	4.11287	4.07004	5.09455	3.82132	5.65029	9.18871	11.6151	6.17773	7.75961	6.32422	2.73806	2.90954	2.4973	19.4361	18.4441	20.7099	22.3189	1.37133	1.65177	1.31	1.81641	1.77969	20.9019	18.0036	24.0844	8.38092	5.87238	6.18971	7.07586	5.63517	5.55616	9.21531	24.0975	14.4718	15.2931	0
mir-27b-AGAGCTTAGCTGATTGGTGAA	7.44742	9.4844	13.0319	16.1814	18.3895	11.1742	3.74969	4.94161	11.5481	14.0186	17.0251	18.2435	13.3277	15.9676	5.97376	7.54975	7.64267	8.90349	13.8951	19.3585	12.6683	15.872	13.0565	17.163	17.7879	19.7222	23.8418	21.1434	22.4359	17.1684	7.73823	9.23956	10.5991	6.93539	4.56331	17.0098	20.2024	19.7729	8.59042	5.09416	2.50536	28.0824	25.6145	34.1917	30.4321	19.6927	14.2762	16.5675	3.3014
mir-382-GAAGTTGTTCGTGGTGGATTC	844.368	1335.52	1274.83	919.018	1100.89	663.371	367.773	326.415	738.51	777.569	827.636	915.955	890.093	751.808	1468.37	2331.71	1623.77	817.862	1316.79	1355.28	882.008	1471.09	1073.7	28.516	23.2763	30.5439	6.47875	10.7966	11.0022	8.01193	12.4889	13.3174	12.6237	13.2929	9.71985	4.03624	7.97104	1.33802	0.942854	1.69805	0.957935	7.96034	5.29364	10.0438	11.3584	29.28	14.2762	20.6457	1.35057
mir-30e-TTTCAGTCGGATGTTTACAGC	11.3543	14.6711	15.6865	17.2898	23.0753	12.1674	12.1612	9.25428	14.1144	17.0894	17.4853	22.3864	17.3081	16.149	10.1095	16.6954	12.8339	11.2435	18.8257	21.0582	14.2322	28.2168	16.2696	8.08062	11.043	13.2548	107.547	85.0232	93.195	108.161	7.19951	7.43296	9.52727	10.816	10.7238	55.7866	61.0197	53.5208	13.1999	7.42896	8.47398	10.3927	11.7826	12.6082	15.0017	30.3163	14.0806	22.9397	4.27681
mir-195a-AGCAGCACAGAAATATTGGCA	20.1446	10.3735	11.2219	15.184	15.3834	7.69771	97.9989	91.1948	24.9497	31.6421	35.2773	43.3192	24.2403	21.895	9.12473	11.2939	12.0407	7.02001	11.4299	14.2592	13.8412	22.3383	15.7596	34.7267	31.8726	37.2033	32.3937	36.8883	38.1841	45.2103	31.5895	30.6093	38.9427	34.0165	31.213	54.6334	58.9582	46.682	10.5809	7.28747	10.0951	80.9301	81.4538	85.693	106.298	28.2435	14.0806	19.8811	8.70368
mir-223-GTCAGTTTGTCAAATACCCCA	0	0	0	0	0	0	0	0	0	0	0	0	0	0	0	0	0	0.741955	0	0	0	0	0	9.21594	6.6787	7.87609	20.2137	20.2435	16.3955	16.0239	6.02406	8.72342	8.21728	9.74257	14.9676	7.20757	6.18442	6.54143	6.49519	3.8206	4.56859	45.1086	40.2999	40.3889	48.8627	19.4336	13.8852	20.9005	45.2441
mir-320-AAAGCTGGGTTGAGAGGGCGA	16.8482	17.635	20.1511	27.4863	45.178	28.0595	41.5506	41.3298	14.8273	16.8224	17.7921	28.6373	18.8287	18.2055	16.3458	24.552	22.0627	25.1694	43.9265	43.0609	32.3745	37.9162	41.7195	25.1769	29.8227	27.2141	34.2078	44.086	43.1458	43.4934	9.94213	13.5239	13.2191	13.6231	11.1801	32.7224	40.4048	30.7745	12.7809	8.70246	6.92657	44.4453	50.2043	46.3725	46.7196	29.5391	13.6896	19.8809	5.92751
mir-34b-AGGCAGTGTAATTAGCTGATT	322.558	113.961	454.909	152.836	99.5507	52.7668	121.308	47.7988	104.931	122.296	123.93	106.554	166.999	226.813	102.933	258.656	141.028	39.6091	95.249	101.703	269.786	311.207	1156.11	27.8481	19.2426	23.7564	35.5035	52.1836	45.7347	42.3489	27.7694	26.3251	32.3927	26.0903	20.3523	84.4729	112.281	83.4032	3.77141	7.71194	6.70554	4535.84	3394.59	4066.26	4232.61	33.6848	13.6896	20.1359	6.75285
mir-30c-AAACATCCTACACTCTCAGCT	12.8193	13.9301	14.1179	21.3906	25.4623	14.7746	11.4517	10.9614	19.8171	21.2283	21.9333	22.023	15.4744	17.0563	13.1291	17.3092	14.2037	14.2684	22.8598	22.3803	14.4669	26.7471	17.1366	8.21417	8.0012	7.61997	27.2107	24.7422	21.7887	38.3427	6.02406	6.6587	6.31181	6.2749	4.65458	48.1466	49.4754	46.8307	12.8856	9.7638	11.3478	14.3728	10.075	14.3178	13.2872	24.3567	13.494	19.1163	1.80076
mir-149-CTGGCTCCGTGTCTTCACTCC	7.93575	19.7097	13.9972	15.2949	19.7157	9.80841	3.85103	3.50404	8.12646	8.54471	7.66897	11.2659	10.0629	9.49589	15.2954	26.3935	17.1599	14.0971	20.0583	25.7799	13.6067	16.1071	14.1786	0	0.727382	1.02453	35.7627	33.2895	33.0065	40.6319	0	0	0	0	0	1.00907	2.06147	1.48669	0	0	0	0	0	0	0	17.8789	13.2985	14.5284	0
mir-322-GCAGCAGCAATTCATGTTTTG	7.44742	9.78075	8.80861	8.31238	6.27718	3.41432	1.52014	2.15634	6.27306	6.54204	7.20884	6.5415	6.35078	5.38302	7.5493	7.6725	4.83072	4.3376	6.94756	9.34873	8.28908	7.40691	6.01822	9.01557	5.75294	11.0137	51.8298	43.1865	42.4986	52.0775	8.03207	9.54929	7.74091	12.715	14.2375	78.5625	85.0701	68.8337	13.619	9.69304	13.6321	100.389	98.1887	117.961	151.303	25.6523	13.1029	23.4495	10.5044
mir-99b-ACCCGTAGAACCGACCTTGCG	40.5334	62.3892	54.9029	90.7713	90.5328	54.567	80.5679	71.4287	50.1845	49.6661	53.5295	102.338	62.1214	72.0357	48.3154	61.1961	54.0752	62.5526	99.0588	109.918	60.8389	87.178	70.8415	30.5863	29.7566	32.4649	33.9485	29.6907	30.2021	30.331	17.5334	19.8728	19.2927	16.5129	17.7512	71.2109	76.2747	63.333	11.5238	8.98549	10.6846	93.0919	78.5509	97.6601	92.1531	23.3203	13.1029	18.6065	7.95336
mir-342-TCACACAGAAATCGCACCCGT	46.3937	82.8399	59.0055	139.426	140.486	82.6267	18.4444	16.9811	43.7688	42.5901	45.4003	70.7935	47.6757	49.7778	58.8843	83.7225	67.558	92.2882	154.863	156.567	82.7344	71.2474	79.8688	9.3495	6.28195	7.23576	17.6222	15.2952	17.2584	20.6021	16.7498	27.5638	21.4363	21.6318	20.0329	8.79327	8.65819	7.28477	6.39044	4.38662	5.67392	20.1219	22.3699	22.4383	20.5737	18.3971	13.1029	22.6847	93.8649
mir-381-TATACAAGGGCAAGCTCTCTG	798.096	1370.49	994.887	2431.43	2460.39	1137.4	852.498	739.532	784.133	860.88	898.498	1242.23	1086.38	1095.53	982.264	1561.7	1100.54	1409.43	2782.95	2681.96	1359.34	1161.82	1138.06	46.0129	45.2962	59.1667	23.3235	20.2435	15.964	28.614	28.5531	24.5184	34.7745	26.0904	25.9196	6.63096	10.3074	2.23003	3.45713	2.54707	1.84218	6.85474	6.31822	7.69315	10.0726	95.0951	13.1028	25.4884	1.35057
mir-122-GGAGTGTGACAATGGTGTTTG	2.0755	1.18554	5.67129	0	0	0	0	0	1.14056	10.4139	0	0	0	0	0	0	0	0	0	0	0	0	0	0	0	0	3.88724	25.1921	0	0	0	0	0	0	0	2.88302	1.37431	1.04068	4374.42	3199.19	4006.73	23.4388	0	0	0	0	12.9073	5.09771	0
mir-21a-ATAGCTTATCAGACTGATGTT	6.3486	5.63133	9.29123	14.9623	15.9139	9.56012	4.56044	3.50405	6.98591	7.47662	7.66898	6.10539	6.03772	6.77415	7.41799	10.9257	10.5267	5.25076	10.8696	12.8427	20.8792	31.8027	20.2477	119.339	90.394	95.4093	12.4392	7.64758	12.0808	12.5902	123.958	148.195	146.005	81.3263	80.4969	37.3352	44.8026	55.6021	57.6187	52.4978	55.4861	60.5871	55.4979	51.0739	60.0066	19.6927	12.9073	17.587	57.6245
let-7d-TATACGACCTGCTGCCTTTCT	22.2202	25.9338	27.3911	52.4234	52.4277	27.6249	32.8351	25.1573	25.0922	24.1655	32.0563	41.8655	30.5463	31.9352	23.6324	28.9714	27.0376	27.6236	48.4089	50.7098	35.5024	44.5003	36.2623	20.7693	19.7055	21.2591	40.4274	30.5904	27.3977	33.7647	11.6073	13.0077	15.9582	15.7698	13.4618	38.3443	35.8696	35.9779	17.0761	10.1883	11.2741	26.5345	27.4928	31.6273	31.0749	16.5833	12.9073	16.5675	7.42814
mir-34c-AGGCAGTGTAGTTAGCTGATT	388.73	152.194	524.533	172.787	118.382	56.864	143.198	55.346	119.473	132.176	140.956	133.228	200.362	268.305	127.55	320.896	176.069	54.4482	111.833	113.129	323.041	348.947	1423.66	29.6513	25.1278	26.1896	35.7626	69.7279	58.6784	55.5113	30.2182	25.2927	34.2981	27.2463	22.3602	105.519	117.779	92.472	5.02855	6.36767	6.11601	6127.92	4521.47	5470.47	5707.27	40.1628	12.9073	19.8811	7.87833
let-7a-CTATACAATCTACTGTCTTTC	26.6153	30.2314	31.4334	45.3302	42.4373	22.7518	37.7503	30.5032	32.8623	35.2469	37.8081	52.2229	39.0439	42.3384	17.9541	30.3218	23.7931	18.4633	37.2591	42.211	35.9716	53.1122	34.6047	21.8043	20.2015	24.1726	69.0633	59.8311	54.6873	66.9569	18.5865	16.1563	19.2332	17.6275	21.8583	48.7232	51.8805	51.7367	26.7141	20.6595	19.7481	42.2341	36.9702	44.1288	55.9349	32.778	12.7117	19.8809	12.7179
let-7c-CTATACAATCTACTGTCTTTC	26.6153	30.2314	31.4334	45.3302	42.4373	22.7518	37.7503	30.5032	32.8623	35.2469	37.8081	52.2229	38.9991	42.3384	17.9541	30.3218	23.7931	18.4633	37.2591	42.211	35.9716	53.1122	34.6557	21.8043	20.2015	24.1726	69.0633	59.8311	54.6873	66.9569	18.6354	16.1563	19.2332	17.6275	21.8583	48.7232	51.8805	51.7367	26.7141	20.6595	19.7481	42.2341	36.9702	44.1288	55.9349	32.778	12.7117	19.8809	12.7179
mir-541-AAGGGATTCTGATGTTGGTCA	915.053	1576.48	1257.33	1637.54	1746.3	963.211	212.313	194.16	898.617	828.971	880.706	1131.82	1176.01	970.758	1344.95	1940.29	1277.4	1325.31	2072.17	2176.65	975.766	1171.4	1009.17	56.7648	44.7011	65.8903	17.6222	16.1948	17.9055	20.0298	26.594	23.486	31.44	26.6683	18.162	8.79327	20.4774	6.24409	6.28569	6.08468	5.82125	17.2474	11.9534	17.9506	18.6449	31.3528	12.7117	25.9982	2.85121
mir-29c-GCACCATTTGAAATCGGTTAT	4.51728	2.66747	4.34396	9.86403	9.19474	3.84887	4.86446	3.14465	4.98993	6.67556	4.90815	6.83224	5.94826	5.50398	2.69148	5.58559	4.47022	4.90833	8.85254	9.06545	6.33413	8.1711	5.6102	2.60451	1.85152	2.81747	16.8447	11.2464	11.0022	7.43966	1.56724	1.755	2.38182	1.89898	1.27773	6.77513	5.77213	8.02812	2.19999	1.7688	1.62111	5.30691	3.2445	5.98356	4.71483	27.9843	12.7117	16.0577	1.35057
mir-31-AGGCAAGATGCTGGCATAGCT	390.562	465.03	573.282	545.736	644.161	300.894	26.6532	24.2588	374.244	399.198	428.849	218.995	259.8	205.644	183.48	209.675	140.163	306.371	589.423	582.267	267.676	933.152	293.413	16.7623	20.1022	26.8939	240.232	272.615	194.588	276.412	2676.73	2478.06	2610.71	4235.55	3155.49	326.792	351.962	176.024	1090.15	720.468	1099.33	586.854	531.414	629.341	638.857	44.3085	12.5162	54.8002	9.07884
mir-106b-CCGCACTGTGGGTACTTGCTG	17.825	21.6362	19.1858	49.6527	54.5496	28.7424	19.7619	16.6218	14.6847	16.4218	19.9394	28.9279	20.1704	22.4998	18.3808	24.1838	20.7649	32.7602	53.3394	55.1481	33.3128	31.8027	30.2952	34.5931	33.7242	33.6815	29.2839	22.0431	25.0246	32.0477	39.4257	44.1332	41.9199	38.1448	34.3161	36.6145	38.2061	41.1812	11.7333	10.1883	10.3162	40.9072	32.4449	41.4575	42.4335	32.6485	12.5162	20.1359	34.6647
mir-140-AGTGGTTTTACCCTATGGTAG	7.44742	12.7446	12.5492	13.189	13.1732	7.20113	8.9182	8.35581	11.4056	9.74631	12.5771	14.5366	13.7302	12.1572	9.453	14.7925	11.7523	7.19129	11.766	14.2592	13.763	18.8699	13.6174	10.0173	8.92697	9.34883	38.095	36.8885	37.1054	38.9152	10.3829	12.6463	11.3136	13.3754	12.9598	31.7133	31.4718	30.7745	10.4762	8.70246	10.7583	26.5345	22.7114	25.8576	25.2886	20.9883	12.5162	15.8029	19.8084
mir-455-GCAGTCCACGGGCATATACAC	21.4876	25.9338	27.1498	32.5845	37.221	20.9205	21.0793	28.6613	17.9638	22.6969	25.7678	27.3289	24.8664	24.7983	28.4903	31.7949	26.3166	20.0899	36.9789	39.7558	28.1517	39.2096	40.9034	87.8183	87.352	103.67	65.8239	55.7824	35.8111	40.6319	68.9581	79.2847	86.6982	66.2991	59.323	196.623	207.66	196.986	123.619	142.141	61.8233	129.135	115.094	114.756	116.156	23.5795	12.3206	17.587	29.5625
mir-187-TCGTGTCTTGTGTTGCAGCCG	65.1953	97.0662	92.6712	2025.46	2233.87	1270.81	129.314	113.657	42.7709	40.1868	50.4619	839.202	203.494	364.472	156.303	210.963	291.574	1198.03	1940.05	2004.59	887.095	343.775	770.434	54.0936	54.5538	59.9992	55.7171	48.1347	45.0874	60.6617	29.6305	32.4159	36.9181	30.4663	28.1556	710.235	783.085	962.931	72.0761	42.2389	45.3911	209.622	159.493	206.006	195.45	38.0899	12.3206	20.6457	33.6142
mir-139-CTACAGTGCACGTGTCTCCAG	63.6082	104.625	85.4315	308.113	357.888	181.456	5.67521	2.69542	51.8952	58.2108	61.5052	90.2	73.0787	74.5155	56.9806	66.5975	75.7055	222.987	347.49	339.859	173.133	69.1311	149.18	24.5758	12.0349	17.8012	22.8052	20.6935	26.1032	32.0477	5.24044	6.91677	6.31181	4.62361	4.06134	12.397	12.9186	10.7042	10.4761	7.99497	7.44241	3.53794	2.56145	3.41919	4.07188	19.4336	12.3206	19.6261	7.35311
mir-190a-GATATGTTTGATATATTAGGT	26.7374	33.9362	43.6809	101.855	99.1086	50.2216	13.8841	13.2974	29.3693	33.2443	31.136	46.4446	38.0599	36.6529	27.44	44.5006	32.2288	57.0165	99.507	98.209	71.9432	72.188	53.654	18.8994	13.4897	19.274	29.8022	22.9428	20.71	17.1684	11.9502	10.3236	11.5518	10.8985	9.85673	186.099	183.471	148.966	8.17137	10.1883	9.1372	15.9207	14.0026	18.8055	14.3588	28.5026	12.3206	17.8419	0
mir-339-TGAGCGCCTCGGCGACAGAGC	5.00563	10.2253	6.39528	8.86655	9.19474	4.03511	5.47252	3.86344	5.41765	6.80907	5.9818	9.08541	8.63169	7.74187	7.8775	11.9691	7.6426	4.28052	8.29225	9.06545	8.60191	10.7576	8.77235	6.14395	5.22394	8.83657	22.8052	20.2435	11.4336	22.8912	8.22798	8.36209	8.81273	8.91696	7.52948	29.9835	29.8227	38.0593	6.49519	7.49968	7.58979	21.0065	16.2225	22.2246	24.217	21.2474	12.3206	12.7443	10.5044
mir-411-ATAGTAGACCGTATAGCGTAC	211.213	292.977	249.899	527.006	527.195	266.441	87.6616	77.8979	247.501	288.384	299.857	305.996	262.931	253.425	207.178	330.593	218.031	302.661	561.408	524.851	249.534	235.552	213.239	16.562	13.7542	18.1855	15.549	13.0459	12.0808	18.313	10.6768	8.77502	11.1946	7.10052	8.30517	2.30642	6.04699	2.3787	1.25714	1.06128	1.91586	6.85474	8.02585	8.54795	9.42964	36.7942	12.3206	22.1751	1.50063
mir-378a-CCTGACTCCAGGTCCTGTGTG	0	0	0	0	0	0	0	0	0	0	0	0	0	0	0	0	0	0	0	0	0	0	0	1.33564	1.05801	1.40874	8.55194	9.89687	10.1393	8.58422	1.0285	0.825883	0	0.74308	1.04956	1.15321	1.37431	1.63536	0	0	0	0	0	0	0	25.3932	12.3206	13.5089	0
mir-27b-TCACAGTGGCTAAGTTCTGCA	7.44742	4.1494	7.48128	14.6298	16.0908	9.93256	5.77655	5.84008	6.13049	6.67556	10.2765	10.8298	8.63169	10.0403	5.71118	8.53184	7.85893	8.16152	16.0243	15.1091	16.3436	18.3997	13.9745	21.4371	19.0443	22.0274	49.7567	40.0373	29.1235	38.9152	10.6768	11.614	13.4573	12.9626	10.0849	36.4703	38.3434	31.5178	15.9237	9.76376	9.94775	33.3892	34.4941	40.3889	43.505	28.5026	12.125	14.2736	4.27681
mir-144-CTACAGTATAGATGATGTACT	2.93012	2.96386	2.17198	5.09826	4.24373	1.7382	3.04029	1.25786	4.13451	7.07609	5.21491	2.68928	3.13066	3.14513	1.90373	3.86695	1.73041	1.31269	5.15465	3.39954	3.75355	4.82037	3.41712	2.60451	2.90954	2.8815	112.989	49.4844	111.963	141.926	2.98754	5.11015	2.97727	4.70617	9.35482	66.7421	81.497	132.018	46.9331	91.7651	67.4231	83.8048	80.6	129.074	141.23	20.2109	12.125	15.0382	52.147
mir-345-CCCTGAACTAGGGGTCTGGAG	21.4876	36.3072	37.527	34.912	31.5627	20.1135	17.9377	15.903	17.3935	17.8905	21.78	40.3391	35.2871	32.2982	33.1511	54.6897	40.8087	23.4002	39.2201	40.9834	37.2228	48.3212	35.4462	45.0111	45.4946	44.9514	29.8022	17.9944	24.1617	32.62	21.0107	23.1247	28.8199	22.0447	17.6144	57.084	62.2565	47.128	31.4283	15.4239	19.4534	32.0626	26.2975	30.9863	33.6467	18.3971	12.125	13.5089	3.75159
mir-34a-GGCAGTGTCTTAGCTGGTTGT	49.568	12.1518	109.805	11.9698	14.1457	10.0568	64.2515	63.2525	89.3909	106.676	117.949	17.8073	7.73722	9.91924	22.3852	40.8178	49.5329	4.3376	9.63694	10.4819	59.3532	139.791	62.1712	20.3018	17.7217	20.4907	48.2019	39.5875	40.9886	34.9092	7.10152	7.17483	8.45546	12.3847	8.71589	58.5255	53.0486	55.1561	12.4666	4.95262	4.34753	43.1184	37.0555	40.3889	51.22	21.7655	12.125	18.3517	12.3052
mir-136-CATCATCGTCTCAAATGAGTC	589.809	875.672	715.427	1166.62	1155.62	550.079	300.077	256.334	672.643	800.533	784.382	648.554	708.112	666.83	624.358	1036.4	695.406	613.312	1204.62	1166.7	634.899	888.476	575.963	24.509	21.8215	31.5044	13.2166	14.3955	16.6112	19.4576	12.9786	13.369	15.9582	13.6231	13.188	2.88302	6.73415	2.23003	2.09523	2.26406	1.1053	10.3927	7.51355	11.7534	11.5727	52.3412	12.125	28.802	1.87579
mir-185-GGAGAGAAAGGCAGTTCCTGA	20.5109	24.8964	27.2704	26.7105	28.1147	16.4508	11.1477	10.2426	21.9557	24.032	26.8415	33.6524	28.9811	25.5845	25.2736	41.6771	29.2727	18.3206	27.9024	34.0897	27.0568	45.4408	32.2841	4.74153	7.07549	7.23576	30.3206	27.4414	33.2223	32.0477	7.44439	8.05236	7.38364	8.17391	5.70414	18.3072	20.7522	23.341	9.63804	5.80166	4.78965	11.7194	8.19662	12.8219	10.9298	14.7695	11.9295	12.9991	3.00127
mir-21a-GCTTATCAGACTGATGTTGAC	3.54057	2.37109	3.98197	10.0857	8.8411	5.15252	2.93895	2.51573	4.27709	3.47129	4.29463	4.50636	3.35428	3.99191	3.8731	4.84903	5.19122	3.25319	5.49082	6.32692	8.44549	12.9915	9.48636	145.385	111.818	119.23	11.6617	11.2465	10.7865	14.307	169.065	176.326	195.905	84.4638	105.914	22.4876	32.4338	38.6538	40.4379	57.946	64.5497	32.0626	32.9572	33.1233	36.2184	18.9154	11.9295	16.3126	29.9377
mir-99a-AAACCCGTAGATCCGATCTTG	20.9992	26.3783	26.3051	30.0354	25.4623	13.2228	17.2282	13.7466	19.2469	26.1682	20.8596	53.6402	36.7182	38.9513	19.2342	24.4293	18.5297	13.4123	23.3079	29.2739	22.9906	33.0959	24.8379	3.87336	3.37242	4.86653	61.9367	49.9341	43.3616	49.7886	1.76314	1.85824	2.26272	2.14667	1.55153	26.3797	32.159	21.111	8.59048	12.8061	11.2005	17.9107	18.9546	25.0027	23.3597	31.8711	11.9295	18.6065	2.92624
mir-7a-CAACAAATCACAGTCTGCCAT	26.127	42.8278	35.4757	53.5318	64.4515	41.9031	49.4553	42.1384	32.0782	39.6528	41.2591	79.2976	47.3625	49.052	25.2737	37.6875	29.7053	36.7553	64.7692	62.8917	35.2677	39.5623	33.2532	11.954	12.2333	14.0233	8.03364	6.29801	6.04043	5.72282	11.4604	11.0462	10.9564	11.4764	10.4043	7.35172	7.55874	6.39276	5.65711	4.31586	4.42122	10.6138	12.1242	11.7534	11.5727	14.5104	11.7339	11.2149	9.30393
mir-300-TATGCAAGGGCAAGCTCTCTT	627.169	931.097	768.882	1551.76	1614.56	765.612	304.333	261.276	670.647	713.216	727.94	708.227	747.961	678.018	703.328	1146.09	751.642	931.096	1781.38	1707.61	860.11	836.098	768.291	23.7076	21.4909	29.5834	12.9575	11.6963	15.7483	10.8734	14.448	12.0785	17.8636	10.7334	9.67422	3.89209	6.45928	1.78403	1.15238	1.34428	1.76849	4.86466	4.95212	5.98357	11.5727	29.0209	11.7339	19.6261	1.6507
let-7e-GAGGTAGGAGGTTGTATAGTT	107.072	178.128	157.468	130.228	181.243	93.4285	97.9989	92.363	125.889	153.538	154.453	197.772	150.765	141.773	125.712	185.859	128.483	113.462	206.41	214.454	112.607	187.817	139.643	24.6426	27.9713	27.6624	23.5827	31.9399	30.4178	33.7647	11.5584	18.221	18.4591	13.7057	12.686	55.7866	68.9907	43.56	6.91425	4.95262	7.51604	63.9039	60.4501	69.6657	74.3655	24.6158	11.5383	19.1163	6.00254
mir-532-CCTCCCACACCCAAGGCTTGC	38.4578	48.7555	43.3189	51.2044	54.9033	27.1904	28.8828	25.3369	28.5139	34.8465	40.4923	53.9311	42.5771	42.5198	47.7245	64.8175	43.7649	34.13	59.6146	61.1919	46.2156	61.1363	56.8671	18.0312	16.267	16.8407	15.0307	17.9944	16.1797	22.3189	12.1461	15.795	13.3382	12.6323	12.184	39.4975	44.5278	44.898	14.038	10.8251	9.80037	24.3233	23.5652	31.6274	28.5032	22.8021	11.3428	23.1945	13.3556
mir-199b-CAGTAGTCTGCACATTGGTTA	0	0	0	0	0	0	0	0	0	0	0	0	0	0	0	0	0	0	0	0	0	0	0	10.5738	10.3707	12.4438	21.3366	16.3448	17.9415	21.7467	8.16268	9.89338	10.6388	9.10959	9.00493	13.0217	11.9108	11.5466	4.43489	2.85366	4.54402	29.3353	32.4449	36.1863	40.7188	20.8155	11.2776	13.169	4.68948
mir-361-CCCCCAGGTGTGATTCTGATT	49.8121	63.5748	57.5575	81.4614	89.5603	51.8356	45.3003	39.2633	51.4677	62.4831	61.3517	88.8918	63.4183	65.201	50.1534	65.738	52.9216	59.3566	90.7666	97.8313	62.3247	94.1147	70.2295	14.0242	12.7622	14.0874	22.5459	22.0431	25.456	26.325	10.285	15.7435	12.1473	12.3847	10.8151	23.0642	27.6237	23.3409	13.8285	9.97602	9.21089	25.4289	26.2975	26.4986	28.9319	29.0209	11.1472	17.8419	17.4074
mir-301a-AGTGCAATAGTATTGTCAAAG	32.8418	54.8314	46.6977	56.7459	63.479	32.9017	30.0989	22.6415	26.9456	31.7757	37.1179	68.9764	50.0907	50.8061	43.5233	71.1396	49.0282	35.9564	66.6741	69.5017	48.2488	71.7176	54.2659	21.0364	19.3749	20.8748	24.8783	24.2924	25.2403	38.9152	21.5984	20.5438	22.1509	19.5678	16.9299	43.9662	42.1915	38.5053	5.97138	4.59887	5.15809	39.3595	30.225	34.8328	38.7902	16.8424	11.1472	14.5284	13.2806
mir-17-AAAGTGCTTACAGTGCAGGTA	5.86025	7.11326	5.91262	7.53656	9.54839	4.71797	1.72282	1.61726	5.27507	6.14151	4.448	8.06785	6.12717	8.46768	4.85779	6.01526	6.27273	3.48149	8.51637	7.64897	8.05451	12.051	9.79239	40.7371	37.4272	41.3014	23.5827	21.1434	17.6898	23.4635	47.9475	55.4374	52.8764	47.392	40.3853	34.308	41.5043	37.1672	20.8475	13.5844	22.4745	31.178	31.7618	35.9014	39.2188	27.7252	11.1472	22.1749	33.6892
mir-1843a-TCTGATCGTTCACCTCCATAC	24.9061	29.0459	24.1331	35.4662	38.724	23.3416	10.2356	7.72686	22.526	28.972	30.2158	35.6149	27.1026	28.9111	20.8097	34.1274	20.1881	25.3978	40.1165	45.5162	26.9787	38.8567	26.1129	3.20554	3.43854	3.13763	13.9941	8.54728	10.355	10.3011	2.00802	2.52927	2.73909	2.64206	1.82533	13.5502	15.3924	12.7855	12.5714	10.6128	7.58974	5.08578	5.97671	5.76986	5.57206	17.3607	10.9516	12.9991	3.00127
mir-190a-ACTATATATCAAGCATATTCC	5.12772	6.81687	11.3425	22.3881	21.307	13.3468	4.35775	3.95328	6.84334	7.07608	8.43588	8.64932	7.15581	8.40719	7.41799	9.02288	9.30093	8.73228	18.2653	16.9978	21.2702	27.041	17.7996	3.94015	2.64503	3.90603	14.5123	8.09743	9.70782	13.1625	2.00802	1.90985	2.02454	2.22924	2.50982	38.4884	39.7178	28.5444	2.19999	2.26406	2.43167	5.74913	3.41525	4.06027	7.50084	14.5104	10.7561	11.7247	0
mir-129-AAGCCCTTACCCCAAAAAGCA	1587.52	2338.93	1503.85	2704.97	3383.75	1946.47	724.096	685.895	1459.2	1727.9	1804.82	1535.15	1038.44	1152.87	2095.87	2929.68	2083.77	2214.28	3838.53	3899	1914.94	2568.13	2047.98	14.9592	15.0105	18.5697	2.85064	1.79944	5.60896	0	8.91365	10.4268	10.1227	7.18309	6.79936	9.94639	7.97104	2.97338	0.628569	0	0	3.0957	0	0	2.57172	8.03255	10.7561	9.17585	2.17592
mir-342-CTCACACAGAAATCGCACCCG	54.8177	103.143	81.0873	128.122	136.064	79.8955	25.6398	22.372	57.4556	61.6821	65.1863	84.7488	55.4574	54.798	85.4049	120.919	91.7835	86.0101	143.434	151.562	85.1588	105.989	81.0419	10.2845	7.27382	9.669	17.8813	16.6448	15.7483	18.313	14.5459	22.4021	18.8163	16.4303	17.7969	9.80231	9.20792	10.1095	6.70475	4.24512	6.92657	18.5741	19.4669	17.3095	14.1445	14.5104	10.7561	12.9991	80.3592
mir-455-TATGTGCCTTTGGACTACATC	11.4763	17.0422	19.1858	20.5039	20.4229	11.05	16.6202	19.7665	12.8313	14.8198	15.9515	14.9001	14.893	15.3023	14.9016	19.6417	20.8369	10.2161	21.0669	21.3416	17.9859	26.8059	26.011	76.3319	68.1096	89.4543	45.6102	41.8367	27.1818	25.1803	93.2014	86.253	118.019	84.4632	86.2011	226.029	212.332	244.411	117.961	180.418	91.7402	78.2768	79.0632	86.7616	83.5809	27.2069	10.5605	12.4894	23.8601
mir-29a-CTGATTTCTTTTGGTGTTCAG	22.8305	31.7133	28.1151	43.3353	45.3548	25.7006	13.6813	11.9497	26.6605	28.8385	33.5901	42.6651	33.4534	39.4957	21.2692	30.9969	25.3072	27.0528	46.616	50.3321	27.9953	34.5656	26.7759	9.48305	8.99313	10.3093	13.9941	8.99716	8.41344	12.5902	7.3464	8.41369	10.1227	6.85282	4.88274	17.154	15.9421	19.6242	8.48567	4.81113	5.96863	15.2573	10.2458	18.5918	16.9305	13.9922	10.5605	10.7052	5.17719
mir-664-TATTCATTTACTCCCCAGCCT	19.5342	27.5639	26.4258	41.7836	48.4491	31.1014	7.39803	6.73855	23.9517	36.8492	31.4428	30.309	25.6267	24.6772	23.5011	34.9867	27.5423	29.45	50.762	50.521	29.3247	36.5055	31.5191	1.93668	1.91765	2.6894	6.73791	6.74786	6.90334	10.8734	1.56724	1.39368	1.78636	1.56872	1.27773	10.0906	8.79562	7.58211	3.98093	2.61782	2.72642	8.4026	4.43982	7.47945	8.78671	12.9557	10.365	11.2149	2.92624
mir-29b-GCTGGTTTCATATGGTGGTTT	17.0924	21.7844	23.7711	27.7079	33.3309	21.1067	9.2222	8.71517	20.9578	21.2283	28.0685	35.6875	26.3424	23.4676	19.6281	23.8156	20.6207	20.3752	35.2981	36.2617	19.237	23.8079	20.1457	8.08062	7.80287	7.1077	9.07023	10.3467	9.06063	7.43966	4.55478	6.45222	6.31181	4.78874	3.37685	11.0997	13.7431	11.0015	7.96187	3.60835	5.82125	13.4884	12.1242	14.7452	13.2872	13.9922	10.3649	17.3322	7.65324
mir-208b-ATAAGACGAACAAAAGGTTTG	0	0	0	0	0	0	0	0	0	0	0	0	0	0	0	0	0	0	0	0	0	0	0	0	0	0	20.7319	21.5932	14.6695	36.6259	0	0	0	0	0	0	0	0	0	0	0	7.297	5.9767	10.8986	9.00102	94.3177	10.3649	23.4495	0
mir-486b-CTCGGGGCAGCTCAGTACAGG	0	0	0	0	0	0	0	0	0	0	0	0	0	0	0	0	0	0	0	0	0	0	0	0	0	0	1.94362	1.79944	2.69661	0	0	0	0	0	0	0	0	0	0	0	0	0	0	0	0	16.4538	10.3649	12.107	0
mir-423-AAGCTCGGTCTGAGGCCCCTC	4.63936	4.00121	6.75727	6.76075	8.39904	5.64915	4.4591	2.60557	4.13452	5.07342	5.82842	8.35859	6.26133	5.50399	5.51425	8.47046	5.76802	5.53614	8.85254	7.46011	9.30568	9.64074	8.82329	15.627	15.8041	16.8408	12.6983	7.19772	14.6696	11.4456	13.0277	15.2272	14.2909	12.2195	13.5074	21.6227	27.074	22.3003	16.1332	8.27795	7.81081	13.2672	13.4903	16.8822	17.7877	16.5833	10.1694	14.2736	17.1823
mir-30d-CTTTCAGTCAGATGTTTGCTG	9.15661	8.15062	9.41195	17.9548	18.478	9.99467	17.8364	17.3406	12.5461	15.7543	14.8778	13.5191	10.8232	12.3386	7.61489	11.8463	7.71471	7.59077	15.0157	19.1696	10.5569	17.4003	11.3224	11.6869	10.9108	12.8067	20.4728	19.3438	15.5324	20.0298	10.236	9.75575	11.6709	11.4764	8.53338	29.6953	30.5098	26.9091	12.9904	7.49968	9.28453	39.5806	33.811	42.3124	45.8623	15.806	10.1694	11.7247	7.8033
mir-145a-CCAGTTTTCCCAGGAATCCCT	0.732532	1.48193	1.08599	0	1.67981	0	0	0.898476	0	1.33512	1.07366	1.23562	1.16281	0	1.44421	1.8414	1.29781	0.8561	1.45674	1.41647	0.860191	1.70476	1.02004	38.1994	31.542	36.0507	20.4728	20.6935	16.6111	18.313	29.6795	30.4028	42.5154	23.2006	22.6341	10.9555	9.75765	7.58211	1.25714	1.13203	0.810557	15.9207	10.075	17.9506	16.0732	14.7695	10.1694	8.92097	3.90165
mir-200c-TAATACTGCCGGGTAATGATG	0	3.26024	5.67129	0	0	1.30365	0.810747	0	0.997985	0	1.22704	0	1.11809	1.75402	2.10066	1.28898	2.23511	0	0	1.98307	0	1.1757	1.12204	4339.11	4736.92	4878.43	6.21958	30.5903	24.1617	18.313	3434.2	3371.82	3354.68	3959.46	2958.67	1010.21	1063.72	745.277	20.0094	15.6361	18.6428	1818.71	1600.74	1944.44	1973.8	182.417	9.97382	98.1308	59.1998
mir-148b-CAGTGCATCACAGAACTTTGT	19.4121	25.4892	23.7712	40.0103	41.9068	18.4373	9.93157	9.79338	20.1024	20.5607	22.24	32.7801	24.5534	24.9796	17.0679	24.2451	18.4576	24.8271	42.5818	45.044	26.4313	30.9797	23.6138	22.8395	18.6475	22.4757	18.9179	25.6419	20.4942	33.7647	18.415	18.1694	21.0791	23.0355	20.9456	24.3615	30.3725	30.0311	18.2285	12.9476	13.4847	20.343	16.9055	22.652	26.3601	22.5429	9.97382	14.0187	10.2043
mir-199a-CCAGTGTTCAGACTACCTGTT	0	0	0	0	0	0	0	0	0	0	0	0	0	0	0	0	0	0	0	0	0	0	0	22.7059	16.5314	23.2441	31.8755	22.0431	20.4942	23.4635	19.5414	17.7049	25.3664	20.8062	23.6835	23.0642	17.4538	16.3536	6.49519	4.95262	5.89494	34.4948	25.6143	26.7123	32.7894	22.0247	9.97382	14.5284	7.20305
mir-224-TAAGTCACTAGTGGTTCCGTT	0	0	0	0	0	0	0	0	0	0	0	0	0	0	0	2.57797	1.51411	0	0	0	1.25119	0	1.98907	34.4596	32.0049	50.7784	29.2839	29.6907	22.2202	30.331	56.1265	55.7988	61.9272	62.0059	58.6385	38.7768	41.0921	26.9091	5.44759	4.74037	5.37915	84.2471	66.9391	103.003	109.727	19.6927	9.97382	15.548	10.8046
mir-1a-CACATACTTCTTTATATGCCC	0	0	0	0	0	0	0	0	0	0	0	0	0	0	0	0	0	0	0	0	0	0	0	0	0	0	5.44213	4.49859	3.23594	5.15055	0	0	0	0	0	0	0	0	0	0	0	0	0	0	0	19.4336	9.97382	12.4894	0
mir-466q-TGTGCACACACACACATACGT	3.54057	4.74218	3.61997	8.31238	8.13381	4.40758	1.62149	1.97664	4.7048	4.8064	3.83449	5.96004	5.23268	6.16931	2.88841	5.58559	3.38871	3.76685	5.82699	5.19375	4.69195	5.64335	3.41712	0	0	0	10.8843	8.5473	7.55052	6.29509	0.930542	1.70338	1.31	1.56872	1.18646	0	0	0	0	0	0	1.76897	0	2.35069	0	17.6198	9.97382	16.0577	1.27554
mir-29a-GCACCATCTGAAATCGGTTAT	5.61608	4.89037	4.94729	9.4207	11.9355	6.64241	6.68864	5.57053	5.56022	7.34311	8.2825	8.21322	5.72464	6.41124	3.21665	4.78765	3.02821	5.87857	11.654	10.8596	5.31754	4.87916	4.64117	2.13703	3.70305	2.62536	17.1038	15.745	9.06063	19.4576	2.59573	3.56162	2.26272	2.88976	2.28165	8.21664	9.34535	7.43344	5.34283	3.46684	4.42122	11.2772	7.85509	8.54793	9.85825	12.4375	9.77825	11.2149	4.87706
let-7f-CTATACAATCTATTGCCTTCC	7.81365	8.15061	11.8252	13.189	13.0848	8.00812	7.70204	5.66039	8.69676	8.4112	6.7487	11.2659	9.39199	11.4918	7.28668	8.96151	8.43574	7.30539	11.3178	11.9928	10.1659	17.9294	11.1694	9.95053	7.47222	9.54093	23.3235	20.2435	21.5728	24.6081	7.00359	7.38136	7.14545	6.68775	7.75763	15.8566	17.1789	19.3269	12.1523	10.1175	9.28453	14.3729	12.6364	16.0274	12.6443	16.3242	9.77824	11.4698	5.25222
mir-200b-TAATACTGCCTGGTAATGATG	103.165	8.447	14.4799	3.98994	3.62485	5.46291	0	1.43756	2.28111	4.13884	6.44195	20.6421	3.08594	6.83462	2.16631	2.1483	6.92163	1.76928	2.1291	5.47704	1.79858	2.76289	8.72133	17314.9	18499.9	20792.5	5.7013	52.1834	28.9077	17.7407	10336.8	9063.41	10044.5	9703.95	7635.77	8482.02	8866.55	7497.07	154.732	94.949	114.067	2810	2449.26	2976.6	3068.5	315.861	9.58268	121.07	57.8497
mir-486a-CTGTACTGAGCTGCCCCGAGG	0	0	0	0	0	0	0	0	0	0	0	0	0	0	0	0	0	0	0	0	0	0	0	0	0	0	3.10979	2.24929	1.94156	5.7228	0	0	0	0	0	0	0	0	0	0	0	0	0	0	0	10.6237	9.38713	7.64655	0
mir-141-TAACACTGTCTGGTAAAGATG	0	2.22289	2.89598	0	0	1.05534	0	0	0	0	1.68717	0	0	1.27015	0.853398	1.22761	1.9467	0	0	0	0	0	0	5534.64	5099.29	5971.11	6.99705	31.4901	17.4741	15.4516	6047.22	4503.69	5602.27	5414.82	5179.95	903.542	941.819	727.288	24.4094	15.9899	22.3272	1573.27	1313.5	1597.18	1656.83	159.874	9.38712	98.6404	58.8999
mir-24-TGCCTACTGAGCTGATATCAG	2.68595	3.55663	5.18862	10.9724	8.31063	4.22134	2.43223	1.79694	5.27507	8.94524	10.2765	7.77711	7.55833	8.0443	1.70679	3.80557	2.16301	2.62539	8.74049	6.5158	7.74172	7.99475	5.10019	8.28099	7.86895	9.98916	12.4392	7.64758	11.6494	12.0179	3.72218	4.59397	6.31181	4.12822	3.33122	13.1178	12.094	15.0155	2.30475	1.69805	2.35799	7.96034	10.075	8.76165	7.50086	15.5469	9.38712	8.92097	0.675285
mir-25-ATTGCACTTGTCTCGGTCTGA	5.49398	3.70483	5.42995	7.20406	8.66428	4.53174	4.96581	5.57054	4.41966	5.34045	6.90207	10.5391	5.23268	7.13704	5.77683	5.64697	5.26332	4.85125	8.1802	9.72646	8.44549	10.8164	7.90528	19.8343	18.2507	21.9634	15.8081	17.0947	21.1414	25.1803	18.7578	23.5376	20.8409	23.7786	17.6144	18.8838	21.9891	19.9217	9.95235	7.71199	8.69505	20.343	17.9301	24.789	24.4315	15.2877	9.19156	10.96	15.8317
mir-206-ATGGAATGTAAGGAAGTGTGT	0	0	0	0	0	0	1.82417	1.61725	0	0	0	0	0	0	0	0	0	0	0	0	0	0	0	0	0	0	0	0	0	0	0	0	0	0	0	0	0	0	0	0	0	0	0	0	0	36.0168	9.19155	8.92097	0
mir-497a-AGCAGCACACTGTGGTTTGTA	16.2377	10.8181	9.77394	12.9673	12.908	6.64241	56.8535	51.1231	22.3834	30.4406	31.4428	39.1762	20.394	26.1893	11.0942	11.9691	13.1943	7.99031	13.7831	11.4262	14.8578	23.1613	16.2186	32.5228	28.897	35.3464	18.6588	17.9942	18.1213	18.8853	28.553	29.3189	38.2281	35.9981	26.0108	47.1375	52.0866	44.7493	10.5809	7.57045	11.7899	68.9896	64.5484	78.0001	86.5813	17.3607	9.19154	12.4894	5.47732
mir-192-TGACCTATGAATTGACAGCCA	4.51727	2.96386	5.67128	4.98744	4.0669	2.73145	6.28326	6.10962	2.13854	5.20694	4.60139	4.361	3.7568	4.05239	2.23196	3.86695	3.10031	3.0249	5.49082	5.57147	3.51896	5.52578	5.91621	1496.58	1712.79	1805.68	18.1405	28.341	15.964	13.7348	2163.13	1913.31	2139.22	2390.57	2087.26	799.32	955.424	949.104	1464.46	1173.84	1244.06	26.9768	9.05042	11.5397	12.0014	24.0977	8.99599	24.7238	5.25222
mir-221-GCTACATTGTCTGCTGGGTTT	131.611	171.608	185.946	125.13	168.777	82.6267	31.2136	28.0324	122.325	120.561	131.6	294.513	229.567	216.227	88.8847	97.2876	90.9186	151.702	248.88	264.22	113.232	77.8313	90.5279	20.1014	20.3668	21.0669	27.4698	26.5416	22.2201	25.1803	9.50133	11.5623	10.0037	8.83439	8.21397	94.2752	95.2401	95.7426	32.476	18.7492	19.6007	66.5572	61.4747	76.0766	83.1521	16.3242	8.80043	11.2149	12.1551
mir-19a-TTGTGCAAATCTATGCAAAAC	2.44178	2.37109	3.37864	6.20658	4.95101	1.98652	1.11477	1.61725	3.84937	3.07075	4.14124	3.56148	2.77288	4.3548	1.5755	3.13039	3.17241	1.48392	2.68938	4.34386	5.08294	6.40756	3.67213	33.1907	35.8402	38.3559	26.4333	22.9428	22.8673	20.6021	49.2209	51.3596	50.1372	51.6853	47.139	30.8484	39.0306	31.5178	22.1046	19.5982	28.2958	20.7853	25.1022	30.1314	30.0034	27.7252	8.80043	20.9005	43.1432
mir-103-AGCTTCTTTACAGTGCTGCCT	23.3189	35.8627	28.4771	47.7685	46.0622	22.5345	14.7961	14.6451	23.8091	24.0321	31.2895	37.4319	30.1438	34.294	27.1774	33.9432	25.8119	29.3358	53.1151	47.9713	25.9621	34.6244	26.4699	14.9592	13.4896	19.2099	11.1434	7.64757	14.2381	14.307	19.1986	18.221	21.0791	18.0816	18.7552	20.3254	20.4774	23.3411	8.48567	5.94315	5.96863	18.7953	18.2716	19.0192	18.002	13.2148	8.80043	9.68562	9.00381
let-7b-AGGTAGTAGGTTGTGTGGTTT	10.2554	9.78075	13.2732	9.08822	15.2067	6.76656	21.9915	19.9461	11.9759	13.3512	11.9636	25.8752	14.088	16.3305	5.4486	7.61113	8.07526	8.04736	14.0072	14.7314	9.07106	14.6374	13.1074	5.94361	9.5221	11.0777	15.2898	15.745	21.3571	18.313	3.52628	5.21339	3.57273	6.2749	3.78755	17.2982	17.7286	14.8669	7.2285	3.9621	5.89494	32.9469	30.7373	36.9698	31.0749	12.1784	8.80043	13.254	3.75159
mir-30d-TAAACATCCCCGACTGGAAGC	8.05785	11.1145	9.65322	14.6298	16.5329	9.43598	7.8034	7.27766	10.265	11.0814	9.96968	9.81225	7.60305	9.19348	6.56455	10.5574	8.86833	7.99031	13.8951	13.787	10.0094	12.1685	10.3023	8.74846	7.67062	9.60496	23.8418	19.7938	18.7684	32.62	6.07303	5.47147	5.83545	6.77025	5.9323	23.6409	22.264	20.3676	6.07613	4.24511	4.78965	23.2177	20.4915	30.1316	24.217	11.401	8.80041	10.4503	2.02586
mir-378c-ACTGGACTTGGAGTCAGAAGC	0	0	0	0	0	0	0	0	0	0	0	0	0	0	0	0	0	0	0	0	0	0	0	2.27059	2.57891	1.66487	13.2166	11.2464	10.1393	8.58422	1.27338	1.29044	1.07182	2.14667	1.41463	2.16228	2.47377	1.93269	0.838092	0.778271	0.884244	0	0	0	0	11.6601	8.60486	6.37213	0
mir-17-TCAAAGTGCTTACAGTGCAGG	5.98234	5.92771	7.84327	9.19905	8.57586	5.46291	1.62149	2.51573	5.56021	5.74098	7.51561	10.3937	7.20053	8.10478	7.15537	7.54975	7.85893	4.50881	8.51637	8.49885	9.22747	13.2266	10.6594	34.8603	32.1371	33.2333	24.1009	22.9428	17.6898	22.8913	34.0384	41.0361	39.3	34.1817	27.8362	41.2273	39.5803	31.6664	14.2476	10.8958	15.769	47.0988	40.6415	44.8766	50.7914	21.5065	8.4093	13.5089	28.5121
mir-127-CTGAAGCTCAGAGGGCTCTGA	801.515	1373.75	1059.2	1247.52	1247.39	631.835	334.736	297.035	755.476	773.83	861.226	830.263	973.369	867.877	1008.65	1786.29	1039.04	848.054	1512.89	1570.97	753.84	1074.12	735.446	22.5723	18.2507	26.3816	12.4392	13.0459	8.1977	4.00596	11.7543	14.5562	16.4346	13.0452	10.6325	3.31549	9.20791	2.82471	1.04762	0.707521	0.663185	6.63363	4.6106	5.55616	7.28653	21.2474	8.4093	14.5284	1.57567
mir-214-TGCCTGTCTACACTTGCTGTG	0	0	0	0	0	0	0	0	0	0	0	0	0	0	0	0	0	0	0	0	0	0	0	29.7849	22.9457	26.3177	31.357	20.2435	14.6696	21.1744	26.4471	24.7765	29.2963	25.8427	26.8323	26.668	28.7232	24.9763	7.64756	5.23565	7.14764	31.1782	23.0529	26.7123	31.9321	24.0975	8.21374	9.43074	5.92751
mir-125b-ACAAGTCAGGTTCTTGGGACC	50.9109	64.7603	54.0582	53.1992	61.0035	30.9772	29.5921	24.3486	48.9013	54.4727	55.0634	111.496	90.6552	90.3621	49.1687	70.9554	46.5767	28.0231	58.2699	64.2138	42.0711	66.5445	43.6575	3.07198	3.96755	4.54637	46.6469	38.2379	30.2021	46.9271	2.00802	2.06471	3.45363	1.48616	2.28166	22.1994	24.8752	17.2456	4.81903	5.09411	5.67392	11.2772	10.9288	11.1123	13.7158	22.0247	8.21374	11.9796	1.20051
mir-802-TCAGTAACAAAGATTCATCCT	1.95342	1.03735	2.05132	2.77079	2.4755	1.80028	0	0	6.84334	10.0134	9.8163	0	0	0	0.656455	0	1.2257	2.22587	3.24967	2.6441	1.64218	4.99672	1.37705	5.87683	3.37242	8.38833	1.5549	17.0945	0	0	1248.15	920.292	881.748	2050.49	1919.65	280.231	292.867	83.8493	2056.36	498.303	718.298	11.056	1.53687	0	0	7.77344	8.01817	18.3517	134.232
mir-98-GAGGTAGTAAGTTGTATTGTT	15.7494	27.1193	26.4258	26.7104	31.7395	13.7193	12.2625	11.8598	16.2529	22.8304	17.1785	34.5246	24.6428	23.5885	18.2495	29.2782	21.8464	17.6357	27.342	31.729	21.5048	30.8032	22.9508	12.7554	10.514	13.447	17.1038	14.3955	18.337	15.4516	10.6768	10.9946	10.0036	11.559	10.9976	17.154	25.0125	18.7323	9.42848	6.36767	5.60023	16.584	16.9055	15.3863	20.1451	16.8424	8.01816	10.4503	7.5782
mir-151-CGAGGAGCTCACAGTCTAGTA	12.6972	12.1518	13.5145	21.2797	19.2735	14.4643	6.08058	7.63702	13.5441	14.4193	14.2643	20.7875	13.283	14.3951	11.0941	11.9078	13.5549	11.7571	20.1705	21.2472	22.2867	28.7458	24.0729	7.74669	8.66249	8.83657	13.4758	12.1462	16.3955	14.8793	7.29743	6.96837	5.95453	7.4308	5.20217	14.9918	13.4683	13.2315	6.59994	5.23565	5.74756	23.4388	16.9055	24.5753	25.2886	16.3242	7.82261	9.9405	3.22636
mir-10b-CCCTGTAGAACCGAATTTGTG	0	0	2.65464	0	0	0	0	0	0	0	0	0	0	0	0	0	0	0	0	0	0	0	0	2.33737	2.90954	2.3052	2.33234	0	0	0	3.0855	2.94221	5.35909	1.65128	1.46026	43.1013	55.2475	34.9372	0	0	0	0	0	0	0	12.9557	7.8226	10.96	0
mir-21a-CAACAGCAGTCGATGGGCTGT	2.93012	1.33373	3.01664	5.65242	3.1828	2.17275	1.82417	2.06649	2.56625	2.80374	2.91422	2.39855	1.92312	2.78224	1.5755	3.31453	2.23511	1.02733	1.79293	2.64408	6.88152	8.52381	5.20219	87.017	62.6212	73.6383	7.51534	11.2464	6.6876	10.8734	138.113	158.105	170.061	67.8677	68.9973	19.4604	21.7142	28.5444	35.3046	51.7905	54.0128	26.3133	26.4683	32.0547	28.0745	12.6966	7.43147	17.0773	45.4692
mir-24-GTGCCTACTGAGCTGATATCA	16.1157	16.1531	18.3412	41.6728	35.4528	18.4373	10.337	10.0629	28.7991	32.9772	29.6023	30.4543	27.8182	33.3867	11.0285	18.3527	13.1943	12.7274	22.8598	26.1576	22.0522	32.2141	21.6248	21.9713	18.9781	24.0125	20.7319	16.6448	19.8471	15.4516	12.5379	12.285	13.5764	10.4031	9.53733	24.7941	23.7756	24.3817	8.27612	5.5894	5.01072	26.0923	22.3699	27.1397	23.3597	11.6601	7.43147	8.1563	1.35057
mir-30e-AAACATCCTTGACTGGAAGCT	9.27871	12.5964	14.6006	17.6223	18.6547	10.9879	7.8034	5.92992	13.9719	16.5554	15.0312	18.3161	14.2669	14.6975	10.372	13.9333	10.5988	10.5015	16.3605	16.9978	11.7298	21.2214	13.3114	11.1527	11.1091	11.7821	38.8723	36.8883	31.7121	55.5113	11.1665	9.08469	9.88452	12.7975	10.2218	50.8855	54.1481	45.344	8.17142	6.86295	9.1372	9.06595	4.6106	10.2575	8.57238	15.2877	7.43147	8.92097	3.75159
mir-205-TCCTTCATTCCACCGGAGTCT	2.68595	2.0747	3.01664	0	0	0	3.34432	0.718782	1.71084	6.27503	2.91421	0	0	0	2.10066	2.02554	1.3699	0	0	0	0.938388	0	1.17304	235.608	356.814	631.561	0	0	1.29437	2.8614	8.47286	16.5177	15.72	10.4857	10.2218	250.247	276.237	130.085	3.45713	30.0695	3.75804	114.319	68.4759	100.011	561.493	2552.29	7.43147	1153.61	0.525222
mir-322-AGCAGCAATTCATGTTTTGGA	2.44177	2.37109	3.61997	1.66247	2.21027	1.17949	0	0	1.99597	2.26969	1.22704	2.6166	1.8784	1.63304	2.03502	2.27106	1.3699	1.02732	1.79293	2.17193	1.95497	1.99868	2.14208	3.07198	1.85152	2.4973	19.6953	14.8453	14.8853	14.8793	2.39983	2.21956	1.42909	2.8072	3.14869	17.7306	21.027	17.2456	2.82856	2.26406	2.72642	15.9207	12.978	14.9589	16.9305	9.84634	7.43147	8.92097	2.47605
mir-22-GTTCTTCAGTGGCAAGCTTTA	1.0988	0	0	1.66249	0	1.05534	0	0	1.14056	0	0	0	0	1.0887	0.722103	0	0.865207	1.19855	1.79291	2.0775	1.25119	0	0	0	0	0	8.03365	6.74787	7.55052	8.01193	0	0	0	0	0	1.58567	1.23688	1.48669	1.88571	1.6273	1.54743	0	2.04915	2.77809	3.00034	12.1784	7.43147	8.92097	0
mir-433-ATCATGATGGGCTCCTCGGTG	771.358	1548.02	1260.6	1045.37	1261.8	661.82	286.598	260.737	607.061	618.691	690.821	918.135	1062.37	848.945	1440.93	2237.37	1495.72	943.136	1454.96	1519.78	874.421	1721.75	1111.33	13.0893	14.0848	16.2645	3.36894	3.59886	4.53031	3.43369	4.30989	5.57471	7.62182	4.62361	3.69628	2.45057	5.49727	1.04068	0	0	0	2.87457	3.41525	2.77807	3.42896	6.21874	7.43147	7.39167	0
mir-181a-CATTCAACGCTGTCGGTGAGT	32.1092	22.8218	24.7364	43.7786	49.687	30.9771	36.2808	29.0207	42.4857	48.064	49.8484	49.0611	34.9292	37.2578	23.6324	31.4266	28.5517	20.2041	42.1337	44.8552	35.1115	65.5452	44.6265	10.9523	10.1834	10.8857	10.6251	12.1462	11.6494	15.4516	9.01158	9.23956	10.48	8.99952	7.48385	17.5865	16.4918	12.4882	1.3619	1.13203	1.25268	23.66	23.9067	22.4383	26.1459	15.2877	7.43146	9.68562	4.80203
mir-181a-ACCATCGACCGTTGATTGTAC	105.851	79.2832	96.4117	185.421	200.163	111.927	87.4587	85.8943	139.719	146.595	167.183	163.756	113.956	143.769	85.4706	107.109	102.166	66.4907	134.805	167.805	153.818	263.18	177.385	21.3702	17.92	21.5151	23.3234	24.2922	20.4942	30.331	19.2476	19.9245	23.1036	17.6688	16.9755	40.6508	41.7793	31.9638	3.87617	1.7688	3.46329	56.828	54.8148	63.4684	69.8651	14.5104	7.23591	12.9991	14.4811
mir-188-CATCCCTTGCATGGTGGAGGG	24.0514	39.8639	38.2511	43.1135	43.3213	18.8098	26.6532	25.4268	24.8071	26.7022	29.7556	32.7075	37.0761	33.3263	26.5209	65.6154	31.8684	18.6059	44.711	44.0051	40.1161	55.493	34.6813	27.6478	23.8714	24.6529	17.6222	17.5445	12.2966	16.5962	22.6759	22.815	24.0563	17.6688	21.0368	63.4267	66.5169	64.0763	14.1428	11.674	13.5584	29.188	28.3467	32.0549	29.7892	17.8789	7.04034	17.8419	16.2069
mir-136-TCATCGTCTCAAATGAGTCTT	363.214	554.686	450.566	714.977	661.402	314.614	156.169	128.392	378.95	416.421	413.665	378.172	431.54	403.425	401.817	697.34	432.602	339.074	693.188	668.482	391.229	560.28	332.837	9.48305	8.59633	12.1663	5.44213	4.94844	3.45167	4.57826	5.97507	5.36824	7.26454	5.86207	4.42641	1.44152	3.0235	0	0	0	0.589494	0	3.07373	3.63288	3.85757	21.7655	7.04034	16.0577	0.750317
mir-146b-GAGAACTGAATTCCATAGGCT	14.6506	21.7844	19.6685	28.4838	29.0872	17.9407	12.9719	9.5238	17.1084	17.8904	19.4793	20.424	16.0111	14.0322	15.6237	23.0789	18.1693	17.8069	32.3846	29.9349	15.8744	20.8098	16.4736	15.8274	11.9688	12.8707	3.36894	2.24929	1.94156	2.8614	6.80768	7.53616	6.78817	7.18309	6.20613	15.28	20.7522	4.90607	2.93332	1.20278	1.17899	37.1483	45.0814	33.978	37.9329	15.806	6.84477	6.627	7.87833
mir-23b-CACATTGCCAGGGATTACCAC	8.91248	6.81687	7.23994	13.9648	15.3834	10.3051	3.24297	4.04313	12.9738	13.3511	17.4853	14.464	12.6121	13.6088	5.97377	7.427	6.05643	6.73468	15.2398	13.787	10.1659	10.9928	10.2514	18.0312	18.5813	19.0819	24.6191	16.1948	17.4741	17.1684	9.5503	9.75575	11.3136	8.25641	6.52553	25.6589	27.6237	21.557	7.2285	5.44791	6.41078	15.0362	11.4411	15.6	11.1441	10.3646	6.64922	7.64655	1.12548
mir-130b-CAGTGCAATGATGAAAGGGCA	24.784	34.8254	24.0125	64.7259	81.8685	37.4954	4.66178	4.49237	33.0761	34.1788	35.8908	24.0582	17.3976	20.8667	30.0001	36.2142	37.6363	56.1033	83.819	83.2887	47.6233	64.7222	50.2368	227.994	192.757	203.37	10.1068	6.74787	10.1393	11.4456	166.078	185.359	170.3	162.404	117.55	16.4332	16.7667	14.8669	6.8095	8.98545	7.44235	28.5247	27.6636	27.7807	28.5032	7.51433	6.6492	11.2149	62.7267
mir-23b-AATCACATTGCCAGGGATTAC	5.98234	6.2241	6.6366	9.86403	11.3166	7.63568	4.15507	3.5939	6.70076	8.4112	8.43588	12.2108	9.52617	9.61686	5.31731	6.38353	4.90282	5.36492	14.0072	11.5207	7.97631	10.4049	8.36429	18.1648	16.3331	18.3135	10.366	8.99716	13.3752	12.5902	8.96262	8.41369	11.79	8.25641	6.84499	15.1359	19.6527	21.4083	4.08569	2.90083	4.05278	12.6039	17.247	15.3863	14.1445	9.84636	6.6492	5.60748	1.05044
mir-183-TATGGCACTGGTAGAATTCAC	4.2731	3.55663	45.7324	5.87409	2.74073	3.97303	9.2222	5.30099	1.71084	1.73564	4.44801	1.96245	1.34171	3.81045	1.37856	1.22761	4.75862	1.59806	3.1376	3.87169	1.17299	1.76355	1.53006	639.372	616.227	666.523	1.5549	3.59886	2.1573	0	551.912	484.69	545.794	395.07	277.312	112.006	139.493	89.7955	25.5618	12.8061	36.4751	126.039	120.046	170.104	165.233	54.673	6.45365	29.3118	5.77744
let-7d-AGGTAGTAGGTTGCATAGTTT	2.31968	2.96386	2.77531	3.54662	3.97849	2.35899	3.95238	4.04313	2.99396	3.6048	3.37435	3.56149	3.13067	2.47982	2.10067	1.71864	1.87461	2.96782	4.93053	5.47704	2.81516	4.40887	2.60109	1.93668	2.57891	1.7289	11.1434	8.54731	9.49208	8.01193	1.32235	1.23883	0	1.56872	1.64279	5.3336	6.18442	4.46007	4.92379	3.32534	3.24222	5.97025	5.29364	7.90685	8.35808	8.80989	6.45365	8.1563	2.70114
mir-153-TTGCATAGTCACAAAAGTGAT	1520.25	2642.12	1772.57	5819.22	5581.65	2495.25	352.065	335.31	1539.47	1763.68	1727.36	2359.14	1889.22	2101.32	1687.42	2932.44	1830.48	2755.34	5783.63	5113.57	2810.48	1790.01	1895.28	37.0641	25.6568	38.6761	13.9941	6.74789	13.8066	10.3011	36.5362	29.835	37.2754	23.2831	19.7592	4.03624	6.87158	1.78403	0	0	0	40.0228	33.128	44.4492	36.4327	5.4414	6.45365	6.11723	3.00127
mir-181a-AACCACCGACCGTTGACTGTA	0.854618	0	0	0	0	0	0	0	0	0	0	0	0	0	0	0	0	0	0	0	0.860191	1.41084	0	0	0	0	1.81404	4.04872	2.58875	2.8614	0	0	0	0	0	0.864909	0	0.892013	0	0	0	0	0	0	0	11.6602	6.45365	10.4503	0
mir-186-CCCTAAGGTGAATTTTTTGGG	13.0635	13.6338	16.5312	15.9598	21.6607	10.4292	9.2222	7.45734	8.69676	11.6154	11.6568	21.9504	15.2061	13.5483	11.6193	17.1864	12.9781	10.1021	18.8257	20.8694	16.3436	22.2208	16.4226	5.81005	5.22393	5.50687	13.4758	7.64758	12.0808	17.1684	5.09351	4.23265	5.00182	5.11899	5.43034	9.80231	8.10847	8.47414	3.66665	3.46684	3.02116	8.84483	7.68433	12.3945	12.6443	8.55078	6.25809	5.60746	3.97668
mir-375-TTTGTTCGTTCGGCTCGCGTG	26.8595	33.6398	27.6324	8.53404	5.74671	2.66937	3.7497	1.07817	8.83935	7.47662	8.12912	8.57664	13.0147	11.3104	11.2911	9.63669	3.89342	3.25319	6.0511	5.94921	16.1872	12.1685	45.0856	3486.63	2557.81	2985.75	0	11.2465	1.94156	0	1715.24	1824.99	1753.61	1414.66	812.634	124.547	149.389	44.1546	3.2476	0.990529	3.16854	244.779	191.425	242.762	228.669	12.6966	6.25809	29.0568	120.651
mir-598-TACGTCATCGTCGTCATCGTT	591.275	817.136	686.708	1560.96	1480.36	681.871	1053.36	958.582	770.019	795.325	784.843	955.423	588.789	686.003	767.268	1637.07	1029.73	857.585	1561.19	1517.04	973.662	829.161	765.691	17.8308	16.9943	21.5791	11.9209	10.7966	14.8853	10.3011	11.3135	13.0593	10.48	11.559	9.12661	22.0552	27.7612	25.2737	11.6285	7.07521	10.3899	15.9207	14.1733	16.4548	22.2882	11.6601	6.25808	11.4698	5.47732
mir-450b-TTTTGCAGTATGTTCCTGAAT	3.41847	3.70482	3.49931	2.88162	2.21027	0	0	0.808629	2.56625	2.93725	3.37435	3.85221	2.99649	1.99595	2.4289	2.94624	1.8025	1.42684	3.47377	2.64408	2.18958	3.52709	2.49909	4.34084	3.10791	4.09813	28.7655	21.5932	18.7684	22.8912	4.01604	4.12942	4.16818	5.53182	4.74584	21.911	26.112	22.3003	3.7714	2.75932	3.9791	43.5607	42.0077	40.1754	55.7206	11.9193	6.25808	14.0187	6.22763
mir-429-TAATACTGTCTGGTAATGCCG	108.415	4.1494	13.3939	4.43327	4.68579	4.3455	0.810747	1.34771	2.99396	3.07075	4.448	17.5894	2.72816	7.3185	2.03501	1.78003	5.19122	2.11172	3.69789	5.85476	2.03318	3.17438	7.70127	9432.41	9682.78	10904.8	5.96043	35.9886	16.8269	11.4456	5221.39	4568.37	5378.86	4758.77	3664.79	5375.12	5550.6	4790.71	73.2283	47.8284	48.9281	1536.79	1349.71	1640.35	1693.05	244.086	6.06251	81.818	25.2857
mir-106a-CAAAGTGCTAACAGTGCAGGT	1.58715	0	1.56866	6.42825	6.36559	1.92443	0.912084	0	1.14056	1.86915	1.38041	1.45366	0	0	1.05033	1.90278	0.8652	1.36977	2.57732	1.88864	1.87678	1.9399	2.8561	4.27406	2.0499	3.13764	4.14639	4.04872	2.58874	4.00599	163.531	159.137	154.46	38.6401	17.7056	59.3904	71.0521	57.6835	2.30475	1.69805	1.6948	13.7095	13.3195	12.8219	11.1441	16.0651	6.06251	18.0967	60.6257
mir-540-CAAGGGTCACCCTCTGACTCT	160.302	262.154	192.462	450.42	342.061	167.24	47.0232	40.8806	184.913	170.093	173.472	151.763	197.589	198.567	143.305	268.17	146.435	181.38	400.045	350.909	175.713	100.228	99.7594	9.88372	8.0012	14.4074	8.81109	8.5473	5.1775	6.86739	6.95463	5.05853	7.38363	6.77025	4.79147	2.16228	3.57323	2.08136	1.04762	0.990529	0.589494	3.53794	4.43984	5.76986	3.21465	25.3932	6.0625	13.7638	0.750317
let-7c-AGGTAGTAGGTTGTATGGTTT	11.8426	8.74339	8.68798	11.9698	14.411	6.82864	18.2417	15.2741	13.8293	13.6181	13.8041	21.2962	12.8357	15.1208	6.63021	8.77736	6.12853	9.24592	13.783	15.0146	9.6185	13.6381	12.3934	6.01039	7.73671	8.19623	17.6222	23.3926	25.8875	23.4635	3.42833	4.59398	3.69182	4.21079	3.10306	18.0189	20.2024	12.0421	8.48567	6.79218	7.00026	24.5444	19.6377	21.7972	26.3601	12.4375	5.86695	10.4503	2.77617
mir-1930-ACCTCCATAGTACCTGCAGCG	1.70924	1.77832	2.17198	3.65745	5.21625	2.42106	0.810747	0.718782	1.8534	1.86916	0	4.21563	3.35428	3.81045	2.49454	2.20968	2.2351	3.31027	4.37024	6.42136	3.12797	3.05682	2.90711	1.33564	1.19027	1.66487	2.0732	0	2.58875	0	0.881566	1.60015	1.42909	1.40359	1.36899	1.87397	1.51174	1.18935	0.838092	0.707521	0	2.87457	1.87839	2.13699	2.35741	5.18229	5.86695	4.33304	1.35057
mir-487b-AATCGTACAGGGTCATCCACT	849.49	1533.8	1135.34	1333.86	1509.18	730.914	308.387	276.82	589.811	560.08	608.917	1144.47	1142.69	926.364	1267.09	1713.18	1256.78	1173.2	1938.7	1982.21	1040.2	1189.34	963.884	18.5654	18.5813	24.5888	4.66469	4.04872	4.53031	4.00596	7.59127	10.0655	11.79	8.75189	6.66241	2.30642	4.39782	1.18935	0.628569	0.990525	0	0	0	0	0	11.9193	5.86695	5.86235	0.675285
mir-380-TATGTAGTATGGTCCACATCT	302.291	665.387	552.769	639.057	674.222	299.281	71.4468	64.4206	273.163	273.564	287.893	354.913	413.561	358.002	577.092	1122.53	679.257	433.36	780.48	747.332	460.593	531.416	415.869	5.74326	4.36431	6.97963	2.85064	3.59886	3.45167	0	4.16297	4.18103	4.04909	3.22001	3.74191	0.864909	1.78661	0	0	0	0	0	0	0	2.57172	8.03255	5.86695	7.13678	0.900381
mir-101a-CAGTTATCACAGTGCTGATGC	7.69155	8.89159	6.87794	16.7356	18.1243	8.93932	10.945	10.4223	10.1224	10.0134	12.2704	11.8474	10.3312	12.2781	6.43329	9.82083	7.71471	7.64788	15.4639	14.3536	11.4171	16.1659	10.2514	3.60623	2.84341	4.22621	7.51534	6.29801	6.47187	5.7228	3.13447	4.33589	4.16818	3.55027	3.05742	23.9291	21.1645	26.6118	8.38092	4.59887	4.93703	12.3828	9.22118	13.0356	11.787	9.32811	5.86694	5.86234	1.6507
mir-3535-TGGATATGATGACTGATTACC	9.88915	16.5976	9.77394	17.5114	17.9474	11.2982	10.7424	11.8598	6.84333	10.2804	11.9636	18.0255	12.2543	11.7338	12.1445	18.9665	10.8871	11.3005	17.481	19.8307	11.3389	12.6975	12.1384	7.27925	8.06735	10.4374	7.77449	8.09745	6.47187	10.3011	8.27694	10.3236	9.52727	7.6785	8.98973	13.8385	20.2024	15.1642	6.70475	5.87243	7.58974	14.1517	10.075	13.463	15.4303	11.9193	5.67139	11.4698	22.8096
mir-484-CAGGCTCAGTCCCCTCCCGAT	12.0867	13.782	12.6699	44.7762	39.2545	21.6654	38.1049	31.177	13.2589	14.5527	14.1109	23.622	14.3563	16.0886	12.3414	14.4244	13.4106	23.4572	36.6427	41.1722	23.8507	24.9248	22.4408	16.7623	13.9525	15.9442	15.2898	9.44702	8.84489	11.4456	12.0481	12.0269	13.8146	12.6324	8.85284	25.9473	28.4483	22.1517	3.98093	4.24511	4.05279	21.0065	15.7102	21.5835	24.6457	10.1055	5.67139	9.17587	7.95336
mir-486a-GGGGCAGCTCAGTACAGGATG	0	0	0	0	0	0	0.810747	0	0	0	0	0	0	0	0	0	0	0	0	0	0	0	0	0	0	0	6.7379	7.64758	8.19771	6.86736	0	0	0	0	0	0	0	0	0	0	0	0	0	0	0	10.3646	5.67139	7.90141	0
mir-100-ACAAGCTTGTGTCTATAGGTA	3.41848	1.92651	5.06796	4.21161	5.21625	3.22808	2.33089	2.42587	2.28112	2.80374	2.60746	4.36101	2.90705	2.78223	2.16631	3.37591	2.5235	1.54099	3.80995	2.73852	5.31754	8.52382	5.20219	0	0.793511	0.83243	2.07319	2.24929	2.58875	0	0	0	0	0.74308	0	0	0	0	0	0	0	2.87457	2.21993	2.99179	0	5.95965	5.67137	4.84281	0
mir-16-ACCAATATTATTGTGCTGCTT	2.56385	2.96385	3.86131	4.87659	3.44803	3.29016	4.86446	4.13298	1.85341	2.80374	4.448	5.2332	3.62263	5.26205	2.62583	3.069	2.45141	1.76928	3.80996	3.49396	4.53555	8.46504	4.84518	23.5741	20.0361	23.6923	20.9911	15.745	21.1414	24.6081	22.2841	30.1963	24.7709	26.338	26.1934	16.2891	16.6292	17.989	10.6857	9.5515	8.62136	35.6004	32.4449	36.7561	40.7188	14.5104	5.47582	14.7833	43.8185
mir-26a-CCTGTTCTTGATTACTTGTTT	4.88354	6.2241	6.39528	10.0857	10.3441	6.82865	11.4517	9.88316	6.70077	6.14151	7.05546	12.8649	8.90003	9.31444	5.25166	6.26077	5.11911	5.25077	10.0852	13.2204	6.95972	10.6401	8.26225	6.67821	6.54645	7.68399	9.32938	5.3983	4.96177	8.5842	8.12999	8.82663	8.21727	7.01796	7.712	8.93735	12.3688	7.1361	5.34283	2.40556	4.05279	12.3828	12.1242	12.3945	14.1444	15.806	5.47582	8.66609	2.40102
mir-211-TTCCCTTTGTCATCCTTTGCC	1.34298	1.33373	1.32732	2.77079	3.00596	0.993256	0	0	1.42569	1.2016	2.45407	1.81708	1.07337	1.39111	1.18163	1.78002	1.3699	1.54099	3.58584	4.34386	1.09478	2.35139	3.06011	2.20381	1.91765	1.66486	0	3.59886	2.37302	0	0.979524	2.99383	2.02454	0.825641	0.684499	0	0	0	0.733331	0.636767	0.736871	2.65345	4.0983	4.70136	2.35741	10.6237	5.47582	8.92097	18.3077
mir-296-AGGGCCCCCCCTCAATCCTGT	41.1438	105.81	63.3495	149.402	159.139	69.1555	16.823	13.567	37.2106	20.9612	25.3076	102.629	44.0083	37.0159	157.944	296.466	164.101	142.57	185.006	164.595	128.872	71.6001	102.106	2.6045	1.78539	2.36923	7.77449	7.64758	7.11907	5.72282	5.43634	4.38751	3.45363	6.2749	1.77969	3.02718	4.94754	3.27071	0.733331	0.849025	0.95793	6.85474	7.17203	5.55616	6.4293	12.4375	5.47582	10.96	13.5807
mir-329-AACACACCCAGCTAACCTTTT	149.68	197.541	174.844	256.021	307.493	158.983	53.6104	51.3028	149.27	155.54	155.834	194.646	168.744	162.882	153.611	191.752	173.545	229.207	371.359	353.458	184.158	218.21	171.366	7.81351	7.60447	7.87609	8.55194	7.19772	2.58875	5.15053	4.65273	3.97456	3.45363	3.63283	3.92445	1.87397	3.16093	1.48669	0.628569	0	0	2.87457	3.75678	4.70136	4.50052	14.5104	5.47581	10.7052	1.4256
mir-10b-ACAGATTCGATTCTAGGGGAA	0	0	0.965331	0	0	0	0	0	0	0	0	0	0	0	0	0	0	0	0	0	0	0	0	1.26886	1.45476	2.17713	0	0	0	0	2.20393	2.11632	2.85818	2.06411	1.36899	36.3262	37.3814	33.1531	0	0	0	0	0	0	0	6.21874	5.47581	6.8819	0
mir-425-CATCGGGAATGTCGTGTCCGC	12.453	16.3012	14.7212	16.2923	17.5938	9.12557	6.78998	4.76191	10.4076	9.21228	9.66291	19.988	14.2222	14.5765	13.0635	18.5368	13.6269	9.5313	18.2653	21.5304	15.2488	20.9862	15.4535	28.5827	23.5408	28.4308	19.6953	13.4957	15.964	18.8853	20.521	21.0084	20.4836	17.7513	14.8308	18.8838	17.8661	17.8403	9.00948	5.51863	7.14764	27.6401	23.3946	26.926	22.5026	12.1784	5.28026	11.9796	24.0852
mir-22-AAAGCTGCCAGTTGAAGAACT	0.732532	0	0.965331	1.32998	1.32617	0.744942	0	0	0	0	0	1.38098	0	0	0	0	0	0	2.01703	1.51091	0.938388	0	0	1.00173	0.859633	1.5368	5.96043	3.14901	2.37302	4.57826	0.73464	0	1.42909	1.32103	1.09519	2.01812	2.47377	3.41938	3.2476	1.83955	2.43167	2.21121	0	2.77809	2.14311	3.88671	5.28026	4.84281	0
mir-1306-CCACCTCCCCTGCAAACGTCC	3.78474	4.74217	4.58529	5.65242	5.92353	4.65589	3.44566	4.13298	4.13452	3.20427	4.29462	7.63175	3.9357	4.95964	5.77684	6.07663	6.92163	4.22344	8.40432	6.79909	6.49053	7.23055	6.98725	2.80485	2.3144	2.43327	5.96043	4.49859	2.37302	4.00596	1.07747	2.27118	2.62	2.06411	1.23209	2.16227	3.0235	1.78403	0	0	0	3.0957	3.24449	3.63288	3.00034	5.18227	5.28026	3.56839	2.47605
mir-361-TATCAGAATCTCCAGGGGTAC	13.918	22.9699	18.3412	27.4862	34.5687	19.1823	17.8364	13.5669	11.1204	14.5527	17.7921	23.7673	19.9916	18.2055	19.7594	27.0687	20.1881	18.4918	35.8584	33.9954	21.3483	27.2174	21.9307	5.209	5.88519	6.65946	5.183	5.84815	6.90334	6.29509	6.61176	7.07163	7.14545	6.02721	4.92838	10.5231	10.5823	9.51484	6.39044	4.24511	4.64228	8.62371	7.51355	10.4712	10.2869	13.733	5.28025	5.60746	4.20178
mir-128-CACAGTGAACCGGTCTCTTTT	165.43	179.758	133.818	197.835	243.307	109.321	61.3125	57.2328	295.12	322.029	311.667	189.557	147.231	129.676	85.0112	81.1445	51.1192	137.319	225.012	271.964	106.819	166.537	115.366	0	0	0.960496	3.10979	1.79944	5.39323	5.15053	0.73464	0	0	0.74308	0.730128	0.864909	0	0	0	0	0	0	0	0	0	15.806	5.28025	9.68562	1.20051
let-7b-CTATACAACCTACTGCCTTCC	12.6972	14.9675	16.1692	26.2672	27.4957	19.4927	16.4175	15.7233	15.1124	21.2283	19.6326	38.8855	22.5856	31.3908	13.7199	17.6161	18.9623	12.6133	24.6526	28.3295	23.8507	34.8007	27.184	10.6184	13.159	13.511	18.1405	16.1948	12.0808	21.1744	6.75871	7.17483	9.64633	7.59593	7.0275	20.037	25.2874	20.0703	9.42854	7.85348	6.55816	18.132	12.978	21.5836	24.0028	7.77342	5.0847	7.13678	2.32598
mir-3084-GTTGAAGGTTAATTAGCAGAG	2.44177	3.26026	3.86131	3.98994	5.39308	3.16601	0	0	3.13652	5.07342	4.448	3.77953	3.30956	3.02416	2.95405	4.54213	3.31661	2.16879	3.80996	4.62715	2.89337	5.99607	3.51913	0	0	0	0	0	0	0	0	0	0	0	0	0	0	1.93269	2.51427	1.48579	1.62111	0	0	0	0	4.66407	5.0847	0	1.57567
mir-491-AGTGGGGAACCCTTCCATGAG	38.2137	48.7555	45.1289	56.1918	68.6069	33.2741	9.42492	8.71517	44.3391	42.59	49.5416	80.6784	67.6224	76.7535	40.8974	49.2268	38.5737	46.1725	81.3537	81.2113	37.4574	54.67	39.2713	1.00173	1.05801	1.7289	5.96043	2.24929	5.39322	3.43369	1.0285	1.08397	1.19091	0.990771	1.27773	2.01812	2.19891	2.23003	2.09523	1.27353	1.40005	6.41251	6.48898	9.83012	9.64395	8.29166	5.0847	5.35258	1.05044
mir-103-CAGCATTGTACAGGGCTATGA	18.5574	27.4157	26.4258	33.6928	37.1326	21.293	9.72892	8.80501	18.3914	20.4271	21.9333	43.7554	32.7826	28.2458	25.4706	32.9612	23.2884	26.1397	43.1422	46.7438	28.4645	39.7386	32.2331	14.1578	15.804	15.7522	10.8843	7.64758	9.27635	16.0239	12.7828	11.5107	12.9808	14.201	11.9103	18.3072	18.2784	19.7729	7.22856	4.10361	4.42122	15.4784	14.1733	21.1562	21.0024	12.6966	5.08468	8.15632	5.70241
mir-425-ATCGGGAATGTCGTGTCCGCC	11.4763	18.9687	17.3759	23.6072	23.4289	13.2228	6.89132	7.8167	11.1204	10.8144	14.5711	23.622	21.4674	19.2942	15.4924	22.7721	18.1693	13.6405	22.7477	24.93	19.3934	29.2162	19.6357	13.8907	12.4316	15.24	13.4758	12.1462	9.70781	9.72879	15.3785	13.9884	13.2191	14.201	10.1306	21.6227	20.065	24.8277	5.97138	4.10361	3.3896	11.4983	10.2458	11.5397	10.9298	8.03255	5.08468	6.8819	7.72827
mir-497a-CCAAACCACACTGTGGTGTTA	4.88354	2.22289	3.8613	6.09574	4.59737	1.92444	10.1343	10.6918	7.27105	7.87715	7.66897	8.50394	7.24526	7.68139	2.56019	5.21731	3.46082	1.25562	2.9135	2.36079	5.08295	7.87719	3.82514	20.9028	18.6475	24.2046	12.6983	10.3467	13.1595	14.307	24.7329	21.0084	28.3436	23.6134	23.3185	25.0823	28.7233	24.8277	3.66665	3.39609	5.89494	26.0923	29.8835	31.4137	33.218	9.58725	5.08468	8.15632	5.10216
mir-337-CGGCGTCATGCAGGAGTTGAT	118.914	152.194	134.904	379.489	427.202	218.393	48.5433	39.6227	146.704	129.506	138.348	158.159	136.587	126.471	103.064	127.425	98.7774	287.365	445.205	432.308	152.958	124.506	136.736	6.94534	7.14158	9.669	5.183	4.94844	3.6674	4.57826	3.23242	3.56162	3.45363	3.7154	3.14869	1.15321	3.16092	1.63536	0.942854	0.919775	1.10531	2.65345	1.87839	4.06027	4.92912	12.9557	5.08468	4.84281	0
mir-130a-AGTGCAATGTTAAAAGGGCAT	7.44742	13.782	10.0152	3.43579	4.77419	2.73145	11.7558	10.4223	3.84938	6.80907	5.82842	11.484	11.4493	9.97977	10.1094	12.2761	6.77742	3.25319	7.28375	4.4383	4.22276	7.34812	8.67031	22.6391	22.5488	26.5738	36.54	28.3411	24.8089	31.4755	18.3171	17.2919	20.2454	15.8523	14.3288	57.8048	59.6452	54.1155	49.8664	28.6545	33.0118	48.6465	45.7644	50.0055	59.5781	13.9922	4.88912	11.7247	4.87706
mir-330-TCTCTGGGCCTGTGTCTTAGG	361.993	588.919	516.69	581.535	619.849	318.587	94.756	89.5778	315.364	354.205	403.542	484.871	462.936	450.782	457.157	756.877	505.566	347.121	641.192	671.031	459.732	817.111	491.453	19.7008	21.0942	25.5493	13.7349	13.9456	12.9437	17.7407	10.6768	13.0593	14.7673	9.41237	9.90236	37.7677	39.4429	37.6133	7.33331	3.89135	2.57904	29.8513	22.5406	29.063	25.5028	7.25521	4.88912	7.13678	7.87833
mir-15b-CGAATCATTATTTGCTGCTCT	1.58715	0	2.41332	2.65997	2.82914	2.23483	2.02686	2.15633	0	2.67022	1.99394	2.25318	1.69951	3.02417	1.90373	2.88486	2.52351	1.02733	3.24967	3.11625	3.75356	5.8785	5.30419	21.7042	20.2345	23.5643	7.51534	6.74787	9.49208	12.0179	20.7658	28.7511	23.58	23.0355	20.9913	9.65813	14.9801	12.4882	6.8095	5.51863	6.11601	24.3233	19.6377	23.9342	22.7168	12.1784	4.88912	9.43074	27.0865
mir-376b-ATCATAGAGGAACATCCACTT	240.026	410.347	282.841	713.535	687.042	328.085	64.8596	58.4907	214.995	216.155	224.087	300.619	341.422	285.783	267.441	377.733	285.373	453.906	800.092	739.212	380.282	289.281	286.834	12.6218	11.043	19.3381	5.44215	4.49857	5.8247	4.57826	8.81566	7.7943	9.17002	9.08209	7.62074	2.01812	4.53524	1.18935	5.02854	6.86295	4.64228	2.43233	3.41525	3.20549	4.92914	8.03255	4.88912	5.86234	0.825349
mir-26a-ATTCAAGTAATCCAGGATAGG	2.93012	3.55663	4.10263	6.20658	6.71923	3.16601	7.29668	6.28932	3.42167	6.54204	5.52166	7.19565	4.11459	5.32253	3.15099	4.78765	3.46081	2.91075	7.17168	7.27124	5.23934	4.87916	4.08015	2.20382	2.57891	2.8815	5.70128	2.69915	3.66739	2.8614	2.30187	2.52927	2.02454	1.81642	1.55153	6.34267	5.49727	5.50075	1.78095	0.919775	1.54743	9.50819	3.92754	6.41094	8.78671	4.66407	4.88912	5.09771	1.57567
mir-337-TCAGCTCCTATATGATGCCTT	156.884	231.181	195.116	516.588	485.465	227.891	61.2112	52.2013	179.068	164.619	169.637	234.331	218.297	207.942	152.955	202.678	147.157	313.962	530.592	486.134	246.014	181.175	191.308	13.8907	12.6301	16.2645	5.44215	4.49857	4.74605	7.43966	8.71774	6.6587	7.97909	6.60516	6.75373	1.72982	4.94754	1.78403	1.3619	1.62729	1.47374	7.96034	7.17203	4.48766	9.42964	26.4297	4.88912	12.2345	0
mir-132-AACAGTCTACAGCCATGGTCG	473.948	564.319	431.862	812.951	839.462	464.285	63.3393	63.9713	860.833	914.952	971.506	419.31	276.035	294.252	339.586	436.658	305.417	524.277	792.023	852.341	443.155	359.53	355.024	14.4918	10.3156	13.8311	10.8843	8.09745	7.76626	11.4456	10.334	10.5816	10.1227	12.137	9.53727	6.05436	7.42131	4.46007	1.15238	1.13203	1.54743	5.97025	4.26906	3.63288	4.92912	4.92318	4.88912	4.07816	1.95082
mir-29b-GCACCATTTGAAATCAGTGTT	19.0458	26.2301	31.735	32.0305	43.233	16.2025	6.68864	5.84008	21.6706	29.9066	27.6083	28.1285	30.0992	30.3627	17.5931	31.6108	19.1787	17.065	38.6598	37.7727	23.9289	29.8627	19.0237	7.34603	4.69494	6.53141	14.2532	10.7966	12.5123	21.1744	5.5343	5.16176	3.93	4.78874	4.74584	14.1268	13.7431	13.0828	6.49519	3.89135	4.20015	11.056	11.6119	13.2493	15.6446	7.51433	4.69357	6.11725	6.67782
mir-423-GCTCGGTCTGAGGCCCCTCAG	2.0755	2.66748	4.10263	5.65243	3.53644	2.97977	1.62149	1.43756	1.99598	1.06809	2.45407	4.21564	2.32563	3.44755	3.61052	3.74418	2.88401	2.11172	4.37024	4.81603	3.51896	4.82037	4.43716	6.27752	6.87709	6.1472	4.92385	7.64758	3.88312	5.15053	6.46481	7.02003	6.4309	6.2749	5.61287	9.51396	10.0325	6.6901	6.07613	3.25459	3.09485	7.96034	5.9767	7.47945	8.5724	6.9961	4.69357	5.86235	6.45273
mir-24-GCTCAGTTCAGCAGGAACAGG	5.73817	4.74218	4.34396	9.30988	9.45998	5.71123	6.38461	3.7736	8.26905	7.61014	10.4298	8.64932	7.28998	7.86284	3.61051	3.9897	4.10971	4.50881	8.62843	8.68772	7.11613	9.22923	6.93625	8.48135	8.26575	8.38833	16.0672	19.3438	13.5909	9.72876	4.75067	4.54235	5.24	3.13744	2.92052	9.94648	10.1699	8.77149	3.03807	2.54707	3.09486	13.2672	12.4657	16.4548	13.9301	10.3646	4.69357	7.13678	1.27554
mir-190b-TGATATGTTTGATATTGGGTT	3.1743	2.81567	3.98197	5.09826	6.63082	3.35225	2.33089	1.34771	1.99598	1.60213	3.52772	3.12537	3.30956	3.32659	1.83808	2.88487	3.02821	3.31027	6.38728	7.17682	3.90996	4.52645	5.4572	2.27059	1.65314	2.1131	4.40554	3.59886	4.74604	4.57826	2.10597	3.09706	1.66727	3.30258	2.14475	4.90114	6.59673	4.16273	2.72379	1.34429	2.43167	6.19139	7.68433	8.97534	10.5012	8.03255	4.69356	8.1563	4.95209
mir-467e-ATAAGTGTGAGCATGTATATG	14.4065	27.5639	20.8752	15.2947	13.7922	7.44942	12.1612	10.8715	6.70077	6.80907	6.28856	20.1333	12.8358	12.8225	20.3502	29.401	15.9342	11.7571	14.4555	16.0534	15.0142	18.5761	14.3825	10.1508	10.9769	12.1663	12.4392	7.64758	10.1393	13.7348	9.15853	9.96222	7.50272	7.761	6.93625	6.91927	7.83361	5.79808	1.57142	1.20278	1.62111	15.9207	14.8564	19.4466	15.8589	14.5104	4.69356	11.9796	34.9648
mir-155-TAATGCTAATTGTGATAGGGG	0	0	0.844662	0	0	0	0	0	0	0	0	0	0	0	0	0	0	0	0	0	0	0	0	3.60624	3.10791	2.43327	5.183	7.19772	8.84489	9.72876	2.88959	13.8852	5.47818	2.39437	2.41855	4.32454	6.45928	4.60873	1.15238	0	0.589494	5.08578	4.6106	3.20549	4.92914	8.80989	4.69356	5.86234	23.71
mir-341-TCGATCGGTCGGTCGGTCAGT	597.502	993.927	799.53	1157.64	1187.71	521.647	156.474	146.99	517.955	528.971	579.468	624.132	730.072	654.793	673.529	1089.68	645.586	703.942	1301.1	1283.52	711.222	938.737	608.655	11.954	10.7785	13.7672	4.92385	0	4.53031	0	6.66073	7.12323	9.28908	6.19233	5.15654	1.58566	4.12295	0	0.942854	0	0	0	1.53687	2.13699	2.78603	11.9193	4.69356	4.33304	0
mir-467e-TAAGTGTGAGCATGTATATGT	7.81365	20.747	10.8599	9.97487	10.3441	5.02837	8.10747	6.91823	6.27306	3.73832	5.06152	12.2835	7.64777	8.58864	12.604	15.9588	10.9593	7.36251	10.6455	11.2374	11.1825	13.9321	11.7814	9.88372	11.572	12.2944	8.03362	6.29803	8.19771	5.72282	7.93414	7.8975	6.66909	6.02721	5.79541	6.63096	6.59672	4.60873	1.57142	0.990525	1.32637	11.7194	9.56272	11.9671	12.6443	10.3646	4.49801	9.17587	24.8355
mir-874-CTGCCCTGGCCCGAGGGACCG	166.895	278.454	237.833	130.117	134.119	65.6791	131.746	125.966	132.02	120.961	146.171	396.415	351.931	355.703	178.819	268.354	149.464	109.639	224.226	252.7	117.846	226.734	130.513	5.81005	6.67869	7.49189	56.2355	40.4872	34.7325	41.2041	3.6732	3.56162	3.92999	3.96309	2.23602	429.428	375.051	351.75	25.3522	13.9381	14.6637	13.7095	10.2458	10.8986	8.78669	9.58723	4.49799	5.86235	2.25095
let-7f-AGGTAGTAGATTGTATAGTTT	3.78475	3.85302	3.13731	6.53908	8.31063	4.22135	4.66178	3.77359	4.70479	3.73832	4.90815	6.25076	4.42766	3.74998	2.88842	3.06901	2.95611	3.82393	7.95608	6.32692	3.98815	4.17374	4.59017	3.94015	3.8353	4.29023	15.2898	12.1462	11.4336	16.0239	2.2529	3.2003	3.81091	2.64206	2.64672	8.93735	9.34535	6.09542	10.2666	6.93372	7.73712	6.41249	8.87966	10.8986	12.2157	7.25521	4.49799	6.11723	3.97668
mir-139-TGGAGACGCGGCCCTGTTGGA	59.5792	74.0965	59.1262	228.757	262.403	163.267	2.22955	3.32436	46.9054	40.5873	47.701	62.7984	48.7488	53.2859	44.114	51.8049	39.8714	196.447	279.695	274.985	114.875	30.0392	92.8237	14.091	8.06735	9.2848	7.77449	7.19772	8.1977	8.01195	1.91007	2.99383	3.33455	2.47694	1.27773	3.89209	5.08496	2.67604	4.19046	2.68858	2.87379	3.0957	1.70763	2.35069	0	5.18229	4.49799	6.37213	4.27681
mir-501-AATCCTTTGTCCCTGGGTGAA	14.0402	20.1542	18.9445	21.2797	23.871	14.0297	7.49939	7.3675	14.1144	13.8852	15.4913	20.9328	17.8	14.0322	23.2386	30.5673	25.7398	17.065	25.2129	27.2907	24.8673	29.7452	26.572	11.1526	9.85275	11.5901	6.7379	4.04872	7.33479	5.72282	5.14248	6.4006	6.4309	6.02721	4.79148	19.8929	22.9511	20.9623	4.0857	3.25459	3.61067	10.8349	12.978	12.6082	13.0729	10.3646	4.49799	7.39165	7.95336
mir-125b-ATCACAAGTCAGGTTCTTGGG	15.8715	20.8952	17.6172	14.7406	19.6272	9.43598	6.68864	7.09791	12.1184	13.7517	13.4974	38.6676	25.9845	29.3949	14.4421	22.0354	14.4922	8.61811	17.481	16.4311	13.2156	22.3971	15.8616	2.27059	1.78539	1.921	13.7349	17.9944	13.3752	19.4576	1.0285	1.13559	1.42909	0	0.867026	13.2619	16.7666	12.6369	2.51428	2.68857	2.65273	10.6138	8.70889	11.326	9.21533	12.6966	4.49799	7.90143	0.525222
mir-125b-TCACAAGTCAGGTTCTTGGGA	17.8249	22.2289	23.8918	20.1714	25.9928	13.4711	10.1343	9.25428	17.9638	18.9586	20.3995	43.5373	32.38	35.8667	18.6434	29.0941	20.4765	13.983	26.7817	28.1406	16.5	28.4519	21.5227	2.00346	1.38864	2.24117	17.3631	21.5932	17.4741	23.4635	1.12645	1.08397	1.31	1.32103	1.27773	13.9827	13.1934	9.96083	1.57142	2.12255	2.72642	11.2772	7.85509	13.8904	13.2872	11.6602	4.49799	9.68562	1.12548
mir-299a-TGGTTTACCGTCCCACATACA	22.3422	24.8964	19.3065	118.923	132.263	68.2244	17.127	15.274	32.6484	37.5166	34.6638	36.9231	24.6428	25.4635	17.8557	23.7541	19.0344	77.9625	127.185	116.529	44.1825	20.5159	33.0492	2.80486	2.77729	3.2657	6.73788	4.49859	2.80449	4.57826	1.37133	0.877502	1.54818	1.56873	1.09519	1.00906	1.37431	0	0.733331	0	0	2.21121	1.87839	1.70959	3.42896	17.8789	4.49799	7.13678	0
mir-193b-CGGGGTTTTGAGGGCGAGATG	2.31968	1.18554	1.08599	15.0731	19.4505	14.5884	1.01343	1.07817	3.99195	2.67021	4.75477	1.88976	0	0	1.44421	4.17385	2.01881	11.3005	16.1363	17.3755	6.64692	6.52513	4.43716	0	0	0	1.81404	0	1.5101	5.15053	0	0	0	0	0	0	0	0	0	0	0	0	0	0	0	5.4414	4.49799	5.09771	0
mir-539-GGAGAAATTATCCTTGGTGTG	63.8523	135.892	104.496	127.679	157.018	79.7091	27.9707	27.2237	49.1865	46.8624	53.8362	108.589	103.356	91.7532	105.624	164.683	114.64	109.125	179.852	180.648	86.8011	93.0566	87.3147	4.20727	4.23205	5.1867	2.0732	2.24929	2.37303	2.8614	2.30188	2.83898	3.21545	1.81641	1.64279	0	0	0	0	0	0	0	1.53687	0	0	21.2474	4.49799	13.254	0
mir-10a-CCCTGTAGATCCGAATTTGTG	0	0	4.2233	0	0	0	0	0	0	0	0	0	0	0	0	0	0	0	0	0	0	0	0	11.2862	12.1671	14.0232	4.14641	3.59886	3.45168	5.15053	34.7241	50.637	66.6908	23.0354	22.634	145.016	149.113	126.517	11.8381	7.35819	9.1372	35.6004	30.7373	38.8931	34.2896	9.32811	4.30243	3.56839	4.95209
mir-15a-CAGGCCATACTGTGCTGCCTC	4.51727	3.26025	3.25797	8.53405	5.83514	3.41432	2.73626	3.50405	4.27709	4.93991	4.60139	4.72442	3.9357	4.83867	1.96937	3.62143	2.5235	1.71221	4.4823	5.00489	7.50711	8.05354	5.4062	6.07717	4.95943	5.763	7.51534	8.99716	6.90333	4.57826	4.40785	6.45221	6.4309	4.45847	4.65458	12.9736	10.9946	11.5962	9.95235	7.2167	8.25296	9.06596	7.34279	9.40274	10.7155	10.1055	4.30243	4.58793	5.70241
mir-30b-CTGGGATGTGGATGTTTACGT	8.66828	7.70602	10.1359	16.1814	14.1457	9.87052	14.0867	15.5436	8.69676	13.6181	11.9636	11.484	7.96083	8.46768	6.23635	9.75948	8.29152	7.93319	10.3093	17.281	9.38388	14.2848	11.9344	8.68165	9.19146	8.5164	11.6617	14.8453	12.9437	11.4456	6.61176	6.7619	5.47818	7.18309	6.57116	22.0552	25.15	16.9483	9.11423	7.42896	6.48447	14.3728	18.1009	25.0027	17.1448	8.80989	4.30243	3.56839	1.95082
mir-322-AAACATGAAGCGCTGCAACAC	3.41848	3.55663	3.61997	1.99497	2.74073	1.61404	0.912084	1.07817	3.42167	3.20427	3.0676	3.0527	2.50453	2.11691	3.28229	3.86695	2.30721	2.16879	3.02555	2.45522	2.42417	2.64533	2.19308	3.94015	3.04179	3.84199	18.3996	21.1434	17.9055	18.8853	3.23242	2.78735	3.21545	4.70618	5.47597	35.0288	42.1915	35.9778	7.22856	3.9621	5.82125	26.0923	30.0542	28.4219	45.4337	10.6237	4.30243	6.627	2.77617
mir-30c-CTGGGAGAGGGTTGTTTACTC	11.8426	13.6338	11.2219	15.5165	14.9414	9.43598	9.32356	9.0746	10.6927	12.55	14.7244	14.8274	10.6442	11.4918	10.7659	14.2402	9.87774	9.01766	18.1533	17.1866	11.4171	18.8112	15.2495	7.94706	9.12537	6.65946	24.1009	18.4441	26.7503	22.8913	5.14248	5.67795	5.35909	6.19233	5.3847	46.1285	47.8262	34.9372	6.70475	4.95262	6.04232	6.63363	4.0983	8.76165	4.92914	5.70052	4.30243	5.86235	3.00127
mir-592-TTGTGTCAATATGCGATGATG	126.728	223.031	100.515	170.349	219.259	100.753	20.0659	19.9461	141.144	133.377	146.171	55.8935	45.9313	31.3304	117.243	162.534	74.9844	44.1749	82.3623	100.853	140.524	125.153	107.716	0	0	0	0	0	0	0	13.0766	15.4853	13.1001	13.7882	9.30913	1.00907	1.09946	0	3.56189	31.7676	48.7071	0	0	0	0	7.25521	4.30243	5.09771	4.42687
mir-132-ACCGTGGCTTTCGATTGTTAC	597.623	749.56	565.922	1203.74	1071.89	574.724	54.1171	52.8302	1234.23	1278.37	1369.52	528.772	361.369	411.831	396.566	491.716	298.711	645.673	1020.62	1045.55	498.911	334.486	345.027	13.0893	9.65435	11.8461	11.1434	6.74786	6.25614	9.72879	12.1951	12.1817	13.4573	13.9534	16.0629	6.77512	7.28388	6.83877	3.45713	2.19331	2.13692	3.53794	3.2445	4.91506	4.71481	4.14582	4.30243	4.07816	2.17592
let-7c-TTGAGGTAGTAGGTTGTATGG	15.2611	17.0422	16.0486	11.9698	16.4444	8.25648	11.5531	7.54718	13.5441	18.4245	17.3319	31.6172	21.378	23.528	10.8972	15.7133	10.815	7.07713	15.6881	18.6031	9.07114	15.5192	14.6375	1.26886	1.38864	1.79293	10.6251	17.0945	14.6696	14.8793	0.783615	1.03236	1.07182	0.74308	0	10.8113	13.4683	6.24409	3.35236	2.83008	2.35799	11.056	12.4657	10.4712	14.5731	8.29166	4.30243	7.13676	0.975412
mir-186-CCAAAGAATTCTCCTTTTGGG	15.6273	20.8952	19.6685	25.2696	25.5508	12.3537	9.62757	9.5238	15.2549	16.4218	17.0251	28.7826	21.378	21.4716	14.9016	19.212	16.9435	12.8415	24.2044	27.6686	18.6896	24.5722	17.0346	6.27752	4.76105	6.1472	15.8081	8.09743	11.8651	12.5902	5.58327	5.72957	6.19271	4.29336	5.65851	8.36079	6.32186	6.09542	3.14285	2.75932	2.50536	12.825	10.2458	13.2493	13.5015	5.95963	4.30243	9.43074	4.5019
mir-142a-CCATAAAGTAGAAAGCACTAC	0	0	0	0	0	0	0	0	0	0	0	0	0	0	0	0	0	0	0	0	0	0	0	2.6045	1.58702	2.1131	0	1.79944	0	3.43367	5.14249	12.2334	5.59727	5.36669	5.7954	1.00906	1.64918	1.78403	1.15238	1.27353	1.62111	7.96034	7.85509	10.0438	6.64361	8.29166	4.30243	9.9405	50.1212
mir-329-AGAGGTTTTCTGGGTCTCTGT	307.419	436.132	376.718	336.042	390.511	212.309	100.329	89.1283	289.274	313.752	327.005	359.928	350.277	310.582	346.084	443.655	325.605	307.17	490.589	501.339	254.538	429.366	286.833	8.5481	9.05922	9.60496	8.29277	8.09745	4.31458	10.8733	5.77918	4.80044	4.64454	3.30258	4.51767	1.87397	4.8101	1.18935	0.733331	0.495262	0.810557	4.64354	3.92753	3.20549	5.35775	9.069	4.30243	9.68562	0.975412
mir-127-GAAGCTCAGAGGGCTCTGATT	232.334	314.762	268.24	659.339	699.95	352.731	105.396	96.8556	255.628	265.688	296.329	326.421	305.643	282.457	246.96	341.275	255.668	418.521	713.919	710.126	348.533	339.66	311.469	7.88032	7.07549	9.98916	3.88724	3.149	1.72584	5.15053	4.94658	3.81971	5.47818	2.97232	4.47205	1.29737	3.02349	1.33802	0	0.566017	0.884244	2.65345	1.70763	4.06028	3.00034	21.7655	4.30243	11.4698	0
mir-204-TCCCTTTGTCATCCTATGCCT	37.237	66.3904	73.9681	32.4737	32.8005	20.2997	149.683	127.403	29.2268	38.3177	39.5718	104.809	58.0962	74.2131	53.3044	92.684	72.9656	21.6879	39.2201	43.1552	57.0072	116.63	239.046	1.00173	0.859633	1.60084	7.77449	5.3983	9.27636	10.8734	0.832591	0	0	0	0	12.9737	11.9566	7.73078	0	0	0	0	0	0	0	6.73699	4.30243	2.54884	1.12548
mir-410-AATATAACACAGATGGCCTGT	543.416	1019.86	708.187	1007.57	1221.49	607.501	173.196	161.636	475.754	541.388	543.423	522.884	612.404	507.637	832.909	1293.9	883.584	783.963	1385.81	1331.3	728.972	963.956	742.178	24.7094	22.615	33.8095	4.92385	4.49857	3.6674	3.43369	15.3785	14.5562	18.4591	11.8067	11.2258	3.17133	7.00901	1.63536	0	0.849025	0.736871	3.31682	3.58601	1.92329	4.92912	15.2877	4.30243	7.90143	0
mir-7068-TCACCCTGGACTGACTCTCAG	0	1.48193	0	0	0	0	0	0	0	0	0	0	0	0	0	0	1.2257	0.8561	0	0	1.48578	1.23449	1.32605	0	0	0	2.07319	0	1.72584	3.43367	0	0	0	0	0	0.864909	0	0	0	0	0	0	0	0	0	8.03253	4.30242	5.09769	0
mir-107-AGCTTCTTTACAGTGTTGCCT	36.1382	61.5001	48.5076	40.2319	48.3608	24.9556	17.431	12.938	35.9276	41.9224	42.7929	49.788	43.2032	39.798	34.3984	51.1911	34.3198	23.3431	43.8144	44.7607	29.7939	50.7314	30.9581	7.34603	4.82718	7.61996	18.6588	13.0459	15.3167	21.7467	6.07303	5.98765	8.21727	6.10977	5.38471	35.3172	36.6942	78.1998	21.7904	9.05626	9.80037	7.07587	4.78136	7.26574	7.92946	9.069	4.10687	5.09771	4.05171
mir-152-TAGGTTCTGTGATACACTCCG	0	0	0.844662	0	0	0.869103	0.912084	0	0	1.06809	1.07366	1.67171	1.78896	1.93547	0	1.41174	0.8652	0	0	1.51091	0	1.1757	0.969035	5.74327	3.43854	4.86652	8.55195	7.19772	7.33479	6.86739	4.79965	4.28427	5.35909	4.37591	3.55938	14.4151	15.8047	9.06877	6.70475	3.9621	2.94748	11.4983	7.00127	13.2493	8.14377	6.99608	4.10687	4.84281	1.4256
mir-16-GCAGCACGTAAATATTGGCGT	2.44177	0	0.844662	3.10329	4.33213	2.23483	3.34433	3.4142	1.8534	1.00134	3.06759	2.76197	0	0	2.16631	1.13553	0.757049	1.71221	3.58584	3.3051	2.18958	3.46832	4.13115	5.6097	4.29817	6.33929	14.5123	9.44702	8.41345	9.72876	3.91809	5.88442	3.81091	4.70618	4.15261	5.47777	5.77213	7.28477	6.39044	4.81113	6.6318	8.62369	6.83052	9.18904	8.14377	7.5143	4.10687	6.11725	8.17846
mir-106b-TACCGCACTGTGGGTACTTGC	1.58715	2.81566	2.65465	5.5416	4.59737	3.4764	1.4188	1.25786	1.42569	0	1.53379	2.6166	2.23619	2.35886	1.83808	2.39383	2.45141	2.56831	3.58584	5.66591	2.73697	4.52644	3.72314	9.61668	8.13344	10.4374	8.55194	5.3983	5.82468	9.15649	8.32591	10.1687	10.7182	7.10052	7.89451	7.49587	8.38332	8.47414	5.02855	4.95262	4.5686	9.50819	7.17203	11.1123	10.7155	8.80991	4.10687	5.09771	9.15387
mir-99b-CAAGCTCGTGTCTGTGGGTCC	19.0458	22.8217	23.8918	28.0404	38.9008	19.5547	23.7143	25.1573	16.8232	17.0894	18.8657	42.4471	29.2047	32.8425	20.6785	27.6211	22.7837	27.167	43.9265	47.027	25.7275	34.5068	29.02	12.9557	13.3574	13.8953	8.29279	5.3983	6.47189	5.15053	5.24044	7.53616	7.02636	7.10052	5.43034	24.2174	27.7612	21.557	3.35237	2.97158	3.16854	31.8413	27.3221	29.9177	31.7178	8.80989	4.10687	7.64655	3.00127
mir-151-CTCGAGGAGCTCACAGTCTAG	9.64494	6.5205	11.4632	16.7356	15.2067	9.00136	3.44566	3.86344	12.8313	8.2777	12.117	14.1005	8.36336	9.13299	7.94316	8.96151	11.0313	6.9059	11.4299	18.2254	16.6564	25.4538	18.2586	3.40589	4.23206	5.25073	9.58853	11.6963	8.41344	10.3011	3.77116	5.21339	4.52545	3.63283	2.92052	7.92832	7.55874	7.58211	3.35236	2.47632	3.09485	12.825	10.2458	12.6082	12.0014	9.32811	4.10687	5.86235	1.72573
mir-29b-TGGTTTCACATGGTGGCTTAG	19.6563	26.6748	22.9265	25.713	29.9713	16.637	9.52621	7.27766	24.8071	27.3698	25.9211	28.5646	23.7036	26.3103	21.7944	36.6439	24.2257	21.6309	34.0655	37.6782	17.0474	31.3912	22.8998	3.7398	2.84341	3.0736	3.88724	2.69915	3.02021	5.7228	1.17543	1.70338	1.66728	1.48616	1.14083	5.91021	6.18442	8.47414	1.78095	0.849021	0.95793	3.98018	3.07373	4.48766	4.92914	5.18229	4.10687	5.60746	0.900381
mir-3058-TCAGCCACGGCTTACCTGGAA	0	0	0.844662	0	0	0	0	0	1.14056	0	0	0	0	0	0	1.16622	0.8652	0	0	0	1.01659	1.82233	1.02004	0	0	0.896463	6.21958	2.2493	4.31459	5.15053	1.32235	0.825883	1.66728	0.825641	0	6.19851	7.97103	7.73078	1.67618	1.20278	1.03162	0	0	0	0	6.47785	4.10687	6.627	0.525222
mir-495-AAACAAACATGGTGCACTTCT	439.885	917.758	698.172	963.127	1028.48	530.71	206.74	183.828	346.016	378.103	361.976	473.749	509.448	424.049	820.771	1356.5	848.912	751.886	1227.81	1222.42	643.344	687.607	630.587	14.2246	8.86089	15.9442	4.40554	4.49859	3.66739	6.86736	6.66073	7.07163	8.09817	5.61438	6.61678	2.59473	3.57323	0.892013	0.733331	0.636767	0.736871	2.87457	2.04915	2.99179	7.28653	11.401	4.10687	6.37211	0.900381
mir-10b-CAGATTCGATTCTAGGGGAAT	0	0	0	0	0	0	0	0	0	0	0	0	0	0	0	0	0	0	0	0	0	0	0	1.80311	1.91765	1.60084	0	1.79944	0	0	2.30188	1.49691	2.38181	1.98155	0.958296	28.542	33.5333	23.4897	0	0	0	0	0	0	0	5.4414	4.10687	6.627	0
mir-138-GCTGGTGTTGTGAATCAGGCC	206.575	381.301	336.175	900.51	995.419	503.768	75.2979	60.9165	254.63	272.229	296.637	548.178	412.175	472.133	234.684	305.305	225.025	565.656	941.394	941.768	421.649	267.002	330.951	5.20901	4.29818	4.9946	2.07319	0	0	0	6.02406	5.67795	7.85999	7.01796	8.03146	1.72982	1.23688	0.892013	0	0	0.552654	0	0	0	0	2.59115	4.10687	3.05862	2.47605
mir-499-TAAGACTTGCAGTGATGTTTA	0	0	0	0	0	0	0	0	0	0	0	0	0	0	0	0	0	0	0	0	0	0	0	0	0	0	183.996	139.456	147.127	157.95	0	0	0	0	0	0	0	0	0	0	0	0	0	0	0	15.806	4.10687	4.33304	0
let-7a-AGGTAGTAGGTTGTATAGTTT	4.27311	6.2241	5.06796	7.75823	9.45999	4.9042	6.38461	7.18775	6.5582	7.07609	6.28857	6.75953	4.91962	4.41529	3.21665	3.98972	3.17241	4.7371	7.73197	8.97101	4.77016	6.76027	4.59017	2.27059	3.17404	3.39377	14.2532	17.5445	17.6898	18.8853	2.10597	2.6325	2.14363	2.22925	1.68842	10.3789	11.1319	6.24409	7.64756	5.30642	5.89494	11.0561	12.2949	13.0356	17.1448	8.5508	4.10686	8.66608	5.10216
mir-451a-CCGTTACCATTACTGAGTTTA	0	0	0	0	0	0	0	0	0.855418	1.46862	1.07366	0	0	0	0.656455	0	0.793104	0	0	0	0	1.41084	1.02004	0	0.793511	0	26.6924	13.9456	31.9279	47.4993	0	0.825883	0	0	1.00393	11.2438	11.8191	24.9764	6.59994	16.1315	10.3898	22.1121	14.1733	20.3013	28.7174	3.88671	4.10686	7.13678	9.82916
mir-532-ATGCCTTGAGTGTAGGACCGT	6.83696	13.9301	12.4286	12.8566	13.8805	8.93932	6.99267	6.55887	8.26904	8.81173	11.1967	11.7747	9.92873	9.67734	11.0285	15.5291	12.4013	8.84645	16.1363	16.5256	12.7465	18.6936	12.1384	7.88032	5.95132	6.53139	3.10979	6.29801	2.37303	8.01193	5.14248	5.36824	5.95454	6.10976	5.70414	11.6763	14.0181	11.0014	4.19046	3.18384	3.68435	5.74915	4.95212	8.33425	8.5724	5.4414	4.10686	6.627	3.82662
mir-93-AAGTGCTGTTCGTGCAGGTAG	1.46506	1.92652	2.29265	3.76829	4.24372	1.48988	1.31746	0.988323	2.56625	1.73565	1.53379	3.12539	2.86232	2.96368	2.03502	3.25315	3.10031	2.79661	4.4823	4.24942	2.50237	4.7028	3.72314	9.81698	10.1834	8.96463	4.40554	3.59886	6.04042	6.29509	8.66877	9.13629	9.76547	8.33898	6.57116	6.91927	6.87158	7.87945	3.2476	2.90082	3.61066	6.41249	5.46441	7.05205	7.07222	4.66405	4.10686	6.88188	5.92751
mir-1843a-ATATGGAGGTCTCTGTCTGAC	10.988	15.4121	13.8765	20.3931	24.8435	11.9191	6.58729	5.21115	16.9658	16.8224	17.4852	18.6069	14.5799	14.758	11.0942	16.2044	12.6175	12.6703	19.9462	24.269	12.3555	23.9843	13.3115	2.00347	2.38053	2.24117	5.44215	6.74787	4.53031	4.00596	1.46928	2.52927	2.5009	0.908209	1.14083	6.63096	7.14644	7.87945	7.12375	6.15541	5.96863	4.2013	3.41525	5.98357	4.92914	7.25519	3.9113	4.33304	1.80076
mir-1191a-CAGTCTTACTATGTAGCCCTA	2.56386	2.2229	4.10263	3.54662	3.2712	1.55196	0.912084	1.43756	4.70479	2.53671	3.68111	3.77953	2.32563	2.5403	2.56019	3.00762	2.66771	1.94049	3.02556	2.73852	2.97157	6.23121	3.67213	2.40416	2.18215	2.43327	3.10979	2.69915	3.23594	0	4.01604	2.94221	3.57273	2.80719	2.64672	3.74793	5.90956	5.64942	6.07613	3.32534	4.12647	2.21121	2.73221	1.70959	3.42896	7.25521	3.9113	5.09771	2.02586
mir-29a-TGATTTCTTTTGGTGTTCAGA	9.27871	17.7832	15.4452	17.6223	22.6332	12.602	4.35775	5.57053	11.4056	12.283	12.7305	17.444	16.1453	17.2378	8.79653	14.9768	10.5987	12.1567	21.7391	25.1189	11.9645	13.8144	10.3533	4.40762	4.6288	3.97007	8.03364	6.29803	4.09886	5.72282	3.62423	4.49075	4.28727	4.12823	2.60108	7.92832	10.1699	8.62278	3.77142	3.11308	3.9791	9.72931	4.26906	6.83837	7.07224	7.51433	3.9113	4.58793	2.77617
mir-511-ATGTGTAGCAAAAGACAGGAT	0	0	0	0	0	0	0	0	0	0	0	0	0	0	0	0	0	0	0	0	0	0	0	3.94015	2.57891	2.6894	4.92385	5.3983	5.1775	4.57823	2.20393	2.16794	3.45364	2.5595	2.28165	0	1.23688	1.48669	5.97138	5.02339	8.40034	3.98018	3.41525	3.84658	3.85757	7.77344	3.91129	6.627	6.45273
mir-1843b-ACATGGAGGTCTCTGTCTGAC	19.7784	24.6001	24.6158	22.6097	30.1481	14.5264	9.72892	6.91823	24.522	27.3698	36.0442	27.0382	21.5122	22.2579	19.6281	27.4369	20.4765	15.6952	26.2215	27.2907	16.6564	25.395	18.0037	2.40416	3.04179	2.62537	2.07319	6.74789	2.37302	3.43369	1.51825	2.01309	2.02454	2.14667	2.14475	4.03623	6.18442	5.20341	5.23807	4.38662	3.68435	6.41251	3.75677	5.34246	4.50052	6.47788	3.91129	4.84281	2.02586
mir-28a-ACTAGATTGTGAGCTGCTGGA	1.0988	0	3.01664	1.44082	1.59139	0	2.63492	1.8868	0	0	1.22704	3.0527	1.74423	1.87498	3.21665	2.4552	2.01881	0.8561	2.01703	1.88864	2.11138	2.82168	1.78506	9.14913	10.2495	11.3979	4.66469	3.59886	5.60895	5.15053	6.95463	8.46529	7.26455	7.10052	5.79541	7.78418	8.10846	5.64942	4.19046	1.9103	2.43167	6.41251	5.12288	7.47945	7.07224	8.80989	3.91129	8.1563	2.40102
mir-494-TGAAACATACACGGGAAACCT	14.8948	16.0049	15.5658	44.6653	36.1601	21.1067	6.89132	5.12131	21.6705	16.4218	15.9515	27.3289	22.5408	23.8305	14.639	14.854	11.7523	29.45	45.9436	40.6056	20.2535	16.2834	15.5045	9.54987	5.09168	9.79706	4.14639	4.49859	5.39324	7.43966	3.86911	2.3228	4.40636	2.8072	2.50982	1.29737	1.78662	1.48669	2.40951	2.26406	1.25268	3.75906	3.07373	3.20549	4.5005	7.77344	3.91129	4.84281	0
mir-10a-CAAATTCGTATCTAGGGGAAT	0	0	6.03328	0	0	0	0	0	0	0	0	0	0	0	0	0	0	0	0	0	0	0	0	19.3	19.5733	23.6283	4.92385	6.74787	6.68761	4.57823	51.6208	67.2579	92.4149	35.4201	34.5443	221.561	236.658	178.849	13.6189	10.3298	15.1795	50.4154	42.1783	50.8602	50.3629	16.3242	3.71573	8.4112	7.65324
mir-144-TGGGATATCATCATATACTGT	0	0	0.844662	0	0	0	0.810747	0.718782	0	0	0	1.23562	0	0	0	0	0	0	1.34469	0	0	1.46962	0.969035	0.734603	0	0	21.7686	13.9456	34.9482	30.9032	0	1.34206	0	0	0.958296	17.2982	17.5912	30.1798	7.64756	17.0512	13.7058	21.8909	18.9546	36.7561	36.2184	4.14582	3.71573	5.86235	7.5782
mir-30d-AAACATCCCCGACTGGAAGCT	4.63936	6.07591	5.06796	6.53908	7.51494	4.40758	4.05371	4.22282	5.41764	7.07608	8.12911	6.9776	4.69601	5.80641	3.8731	5.40145	3.96552	4.85125	7.61991	7.7434	4.45735	7.28934	4.99818	5.54292	4.49656	5.44283	9.07024	13.0459	10.7865	12.0179	4.30989	3.35515	3.21545	4.04566	4.15261	8.50492	10.9946	10.1095	2.51427	2.83007	2.13692	9.28707	10.2458	11.5397	10.5012	5.18229	3.71573	6.11723	0.750317
let-7a-TTGAGGTAGTAGGTTGTATAG	10.3775	10.6699	12.1872	8.86655	11.1398	6.89073	4.86446	4.22282	8.12646	9.34578	8.43588	8.28592	5.6352	4.83867	8.0744	11.2939	8.79622	4.85125	7.95608	10.1042	13.5285	17.6355	14.3315	1.33564	1.52089	2.1131	2.85066	4.04872	4.53033	8.01195	0.73464	0.929116	0	0.825641	0.912661	1.72982	2.74863	1.04068	1.88571	0.849025	0.810557	4.64354	4.43984	4.70138	5.78637	3.88673	3.71573	4.33306	0.675285
mir-299a-TATGTGGGACGGTAAACCGCT	19.29	25.7855	21.1165	82.2372	71.9666	34.826	13.4786	12.5786	23.8091	25.6342	26.5346	25.5846	19.589	20.9272	16.0833	27.8052	17.0878	43.49	65.4416	68.8408	35.1114	21.5741	22.6448	5.54291	4.56268	6.01913	5.183	3.59886	3.23593	7.43966	3.42833	2.89059	3.45363	2.72462	2.41856	0.864909	1.92404	0	1.04762	0.849025	0.66318	2.43233	2.21991	3.63288	3.21465	15.2878	3.71573	6.37211	0
mir-363-AATTGCACGGTATCCATCTGT	0	0	1.93065	4.2116	5.12783	2.79354	1.11477	0	0.855418	1.73565	0	0	0	0	0.853398	1.16622	0.8652	1.25562	1.56881	0	2.42417	1.11692	1.98907	1.46921	0	1.40874	0	0	1.5101	0	72.4847	58.0183	63.5945	17.0909	8.76158	26.5239	29.6852	16.0562	0	0	0	3.31682	2.56145	4.06027	2.14311	3.6276	3.71573	7.39165	18.1577
mir-22-GCTGCCAGTTGAAGAACTGTT	0	0	0	0	0	0	0	0	0	0	0	0	0	0	0	0	0	0	0	0	0	0	0	0	0	0	6.47875	5.84816	4.53031	2.8614	0	0	0	0	0	0.864909	0	0	1.57142	1.41504	1.91586	0	0	0	0	3.36848	3.52018	3.56839	0
mir-137-TATTGCTTAAGAATACGCGTA	1482.77	2818.77	2494.52	1491.02	1607.75	771.886	53.7118	49.416	828.615	781.574	857.851	2743.06	2086.51	1968.31	1275.04	1917.39	1035.44	1182.46	2153.19	2339.84	1057.57	877.718	819.652	38.1327	36.6337	47.6408	3.10981	3.14901	3.45167	0	27.8184	28.7511	37.0372	28.4847	26.4216	3.31548	5.08497	2.23003	45.2569	18.3955	43.2542	2.87457	0	0	0	3.10937	3.52017	6.627	0
mir-221-ACCTGGCATACAATGTAGATT	103.165	149.675	144.678	94.3179	113.343	52.3944	28.2747	27.673	132.305	132.443	149.545	285.138	196.248	205.462	75.2301	88.142	54.3636	92.3449	166.629	179.703	67.6422	54.8464	53.8069	11.6201	12.3655	11.526	16.3264	14.3955	10.355	14.307	7.68926	7.8459	8.69363	6.52259	6.61678	61.2643	65.1426	54.8588	20.4284	14.0089	13.7058	53.9534	49.1797	56.2026	62.5784	4.66407	3.52017	5.86235	5.32725
mir-421-ATCAACAGACATTAATTGGGC	55.0619	110.404	87.9656	66.8316	83.6369	44.1378	27.5653	24.2588	33.9315	34.9799	39.7253	94.6336	91.7285	76.0276	84.4204	135.773	77.508	64.379	99.8433	112.185	65.5309	67.1324	63.5482	23.1066	20.4329	20.8108	9.58853	6.74787	9.70782	20.0298	26.9368	26.5831	29.8918	25.5124	21.7669	42.3805	45.7646	29.8825	11	6.65069	5.15809	19.2376	22.0284	20.515	24.0028	10.6237	3.52017	8.66608	15.0063
mir-33-CAATGTTTCCACAGTGCATCA	10.3775	10.9663	10.3772	16.7356	15.8256	12.2294	8.41148	6.46901	11.1204	13.8852	14.1109	14.8274	10.0182	9.31444	9.12473	11.4781	8.50785	11.0723	18.2653	17.6587	12.7465	16.0483	12.6484	11.5533	7.80287	9.2848	4.66469	2.2493	2.58875	0	6.02406	8.51689	7.50272	5.36669	6.11487	7.20757	7.55874	8.62278	9.00948	6.29694	6.70549	10.8349	9.56272	9.40274	13.2872	7.77344	3.52017	3.05862	4.57694
mir-186-GCCCTAAGGTGAATTTTTTGG	11.7205	17.1905	13.5145	18.509	20.1577	9.87052	8.00611	7.27766	10.5502	14.4192	12.7305	25.0758	17.6212	20.3224	11.6193	16.5727	11.8966	9.75956	21.515	20.9639	11.4953	18.341	14.4845	6.14396	5.09169	5.63494	7.25617	4.49857	6.6876	3.43369	6.17098	6.03927	3.69181	4.95387	4.28951	9.65813	14.2929	7.28477	3.87617	2.40556	3.16854	9.95043	8.53814	10.4712	9.64393	4.92318	3.52017	5.09769	2.32598
mir-24-TGCCTACTGAGCTGAAACAGT	2.80803	3.40844	2.65465	3.54662	5.21625	1.36572	1.11477	1.25786	5.84536	6.80907	7.20884	3.99759	3.53317	3.02417	1.57549	3.19176	1.87461	1.82636	3.13761	3.96613	1.79858	5.11429	2.8561	12.1544	12.1672	15.4961	21.2503	13.0459	12.728	21.1744	5.87713	7.69103	8.21727	6.2749	6.34301	8.50492	7.14645	9.66347	3.87617	2.68857	2.35799	27.4189	24.419	30.9863	29.1461	12.4375	3.52017	7.39167	4.05171
mir-99a-AAGCTCGTTTCTATGGGTCTG	6.22651	6.52049	7.48127	6.31741	6.10036	4.59381	7.49939	5.12131	5.27507	6.40854	6.44194	15.3362	10.8679	12.0362	4.26698	5.03317	3.96551	3.36734	7.3958	6.04363	5.70854	9.69951	6.12022	0.93495	0	1.02453	6.7379	6.29801	5.60896	6.29509	0	0	0	0	0	5.0453	8.2459	4.46007	3.45713	3.11308	2.57904	12.1616	9.39196	14.5315	12.2156	4.40493	3.52017	5.60748	0
mir-142a-GTGTTTCCTACTTTATGGATG	0	0	0	0	0	0	0	0	0	0	0	0	0	0	0	0	0	0	0	0	0	0	0	6.81179	2.44665	4.35427	3.36894	2.24929	2.37303	4.00596	10.3829	25.9121	9.28908	12.2195	13.2336	4.03624	3.71065	5.35208	2.72379	3.32534	3.09485	11.4983	15.7102	11.326	10.2869	4.92318	3.52017	6.11723	44.869
mir-100-CAAGCTTGTGTCTATAGGTAT	4.63936	5.48313	6.63661	9.19904	7.95699	4.59382	4.35775	2.96496	4.70479	5.47395	4.60139	5.88735	4.60656	3.93142	4.20133	6.38353	6.99374	2.62538	6.83551	6.70465	9.14927	14.4611	9.74137	1.26886	1.58702	1.47276	3.36894	2.69915	3.02021	3.43369	1.0285	1.44529	2.14363	1.1559	0.730128	0.864909	1.37431	0	0.838092	1.06128	0.884244	2.21121	2.39067	3.84658	3.85757	7.25521	3.52017	5.09769	0
mir-20a-ACTGCATTACGAGCACTTAAA	3.54057	3.55663	3.37863	5.87409	5.21625	2.48314	2.02686	0.898476	3.56424	2.80373	2.30068	3.85222	3.17539	3.68948	2.49455	3.56005	2.81191	1.76927	3.58584	5.57148	3.98815	5.40821	5.20219	14.8256	15.0105	17.6732	5.70128	4.94844	6.04042	5.15053	16.5049	17.55	21.7937	14.8616	14.5569	19.4604	22.2639	22.3003	8.48567	5.87243	8.47398	12.3828	11.6119	13.463	14.7874	6.21876	3.3246	3.56839	6.22763
mir-542-TGTGACAGATTGATAACTGAA	3.78475	4.59399	3.98197	4.10077	3.44802	1.36573	0.81074	1.34771	2.42369	2.53671	3.22096	3.77953	2.6387	2.96369	2.82277	3.49866	2.2351	1.76928	2.68938	3.68284	4.37915	3.23317	3.11111	3.07197	1.98377	3.6499	16.0672	14.3955	13.1595	16.0239	3.91808	3.92295	3.45364	4.54104	6.61678	21.4786	23.2259	21.8543	7.12375	6.86295	6.55816	47.0988	45.935	39.1068	57.0064	7.77344	3.3246	8.66609	5.25222
let-7g-AGGTAGTAGTTTGTACAGTTT	1.95342	1.92651	1.08599	3.65745	3.1828	1.80028	3.44566	3.95328	2.28111	4.40587	3.52773	2.68928	2.86232	1.99595	1.37856	2.27106	2.16301	2.28294	3.80996	3.96613	1.87678	3.82102	2.60109	1.93668	2.64503	1.98503	9.32939	8.5473	9.06063	12.5902	1.81211	2.6325	1.54819	2.88975	2.23602	5.18946	6.047	4.7574	6.91425	3.18383	4.12647	7.07586	7.34281	5.76986	9.00102	7.77344	3.3246	5.35258	4.95209
mir-15b-AGCAGCACATCATGGTTTACA	1.58715	1.18554	1.93065	2.43831	2.91756	2.23483	1.11477	1.07817	1.56827	2.00267	1.22704	2.90734	1.74423	1.87498	2.23196	2.70073	1.51411	0.970251	2.68938	1.51091	3.75355	4.64401	3.31512	15.1595	14.2171	14.0874	6.73788	5.3983	9.06063	9.15652	15.3295	19.2018	17.2681	18.8247	13.7355	8.93744	11.1319	10.8528	4.39998	6.08464	6.04238	13.2672	12.8072	17.3096	16.9305	3.88671	3.3246	6.627	11.855
mir-676-ACTCTACAACCTTAGGACTTG	9.03459	21.1916	21.7198	13.2998	10.5209	5.71123	2.12821	1.07817	6.5582	5.47396	5.06152	13.3011	11.0468	9.61686	13.2604	19.2119	12.1849	9.64546	14.4555	14.1647	9.69671	7.23055	8.46632	2.80484	1.85152	4.09813	4.92383	5.3983	4.09886	3.43367	2.69368	1.80662	2.97727	1.32103	2.00786	4.46869	5.08497	3.41938	2.82856	1.98105	1.76849	3.53794	3.58601	5.98356	4.71483	6.9961	3.3246	4.84281	0.600254
mir-669c-ATAGTTGTGTGTGGATGTGTG	25.0281	70.8362	44.1636	23.6072	22.9868	11.857	10.7424	10.3324	8.83935	9.07875	9.81629	43.2466	24.4193	23.0441	48.184	67.9478	37.9969	18.0352	26.7817	27.1019	25.0237	33.2722	29.53	9.41631	11.4397	9.98916	5.183	2.24929	6.04042	4.57823	4.94658	6.09089	4.76363	5.77951	3.97008	5.76606	7.00901	2.82471	1.67618	1.13203	1.03162	9.50819	12.2949	11.9671	12.8586	7.25521	3.3246	10.4503	20.2586
mir-154-AATCATACACGGTTGACCTAT	127.583	213.694	156.503	361.533	392.898	195.175	40.3345	35.939	116.907	129.373	132.98	152.781	155.818	137.842	157.681	227.781	169.58	234.23	438.144	410.683	212.311	195.108	191.563	4.4744	3.43855	4.8025	2.33234	2.69915	3.23594	4.00596	4.40785	2.42603	3.09636	1.89898	2.41855	0	1.09946	0	1.15238	1.20278	2.13692	0	0	0	2.14311	6.99608	3.3246	3.31351	0.525222
mir-369-AGATCGACCGTGTTATATTCG	288.617	463.844	371.892	390.348	448.952	213.302	54.2185	43.6658	272.878	289.853	306.76	344.446	351.484	310.462	351.73	508.78	334.041	285.425	493.502	508.326	263.923	388.981	277.909	4.74153	3.43854	6.01913	2.5915	2.24929	3.66739	2.8614	3.08549	3.45839	4.04909	1.98154	3.14869	0	0	0	0	0	0	0	0	1.92329	2.78603	5.18229	3.3246	4.58793	0.675285
mir-22-TAGTTCTTCAGTGGCAAGCTT	0	0	0	0	0	0	0	0	0	0	0	0	0	0	0	0	0	0	0	0	0	0	0	0	0	0	1.5549	1.79944	0	0	0	0	0	0	0	0	0	0	1.04762	0	0	0	0	0	0	5.18229	3.12905	3.05862	0
mir-26b-CCTGTTCTCCATTACTTGGCT	1.95342	2.66747	3.25797	4.43328	4.15531	2.66938	4.05372	4.76191	1.56827	5.20694	4.44801	4.94245	3.39901	3.32659	3.41358	5.09455	5.19122	2.51124	5.04258	4.72159	4.53555	9.11166	5.20219	6.54464	7.33998	8.64447	8.55194	6.29803	7.33479	8.01195	8.12999	8.25883	9.40822	7.18309	7.11876	16.4332	19.5153	13.5288	12.1523	7.85348	10.1688	14.8151	11.9534	15.8137	13.5015	6.9961	3.12904	4.07816	4.27681
mir-16-CCAGTATTGACTGTGCTGCTG	4.15102	2.81566	3.98197	8.42322	6.89607	3.29016	4.15507	3.86344	4.27709	5.07342	5.36828	5.16051	3.08594	4.89916	2.75712	3.86695	2.45141	2.62538	5.82699	6.70465	9.07106	10.1698	6.57924	4.54119	3.70304	4.09813	7.51532	5.84816	6.25614	10.8734	5.38737	5.78119	6.19272	4.8713	4.42641	7.06342	8.10846	7.1361	11	6.22618	5.96863	11.4983	7.68433	7.05204	10.2869	8.03255	3.12904	6.627	6.30266
mir-674-CACAGCTCCCATCTCAGAACA	54.2073	57.6471	50.5589	146.409	139.778	84.8613	30.3015	31.3567	83.118	83.845	96.4757	66.8688	49.2409	47.54	42.5385	52.4801	45.0627	92.9154	141.417	145.519	77.1825	67.8379	71.0455	11.7536	13.5558	14.5356	17.8813	12.1462	15.964	19.4576	7.9831	10.6332	8.09818	9.49493	7.34691	14.9918	17.8661	16.2049	7.75237	3.96211	3.90541	26.3133	20.833	23.0795	23.5741	7.51433	3.12904	4.84281	3.0763
mir-28a-AGGAGCTCACAGTCTATTGAG	0	1.03735	0.965322	0	0	0	2.73626	2.06649	0.855418	0	1.53379	1.67171	1.38644	1.57257	0.919039	1.41174	1.0815	0	2.1291	1.41647	1.17299	1.52841	0.969035	7.34603	7.67062	8.96463	5.44215	3.14901	4.74605	7.43963	6.21996	7.2781	8.69364	7.18309	5.11091	7.20757	9.48278	5.94675	5.13331	3.11308	2.94748	3.75906	4.95212	7.47945	7.07222	6.73697	3.12904	4.33304	2.25095
mir-127-CGGATCCGTCTGAGCTTGGCT	164.819	253.558	244.589	276.968	293.966	139.428	79.9593	71.8782	159.108	166.354	177.767	264.713	253.718	256.329	230.088	369.141	236.85	189.884	314.322	329.19	169.848	332.546	195.387	8.88202	7.33998	10.8216	4.92385	5.39831	3.88312	0	4.40784	4.49075	5.47818	3.88053	3.60502	1.44152	1.64918	0	0.733331	0.495262	0	0	1.87839	2.77809	3.00034	6.99608	3.12904	3.05862	0
mir-7a-AACAAATCACAGTCTGCCATA	3.05221	6.2241	3.61997	7.86906	9.10634	4.22135	5.6752	4.67206	3.56424	4.67289	3.83449	9.37615	5.90354	5.4435	3.74181	6.44492	3.89342	5.93565	9.52488	9.06545	5.86493	5.70214	5.5082	1.20208	1.19026	1.1526	0	1.79944	1.29437	0	0.979524	1.39367	1.78636	1.23847	1.27773	0	0	1.18935	0.733331	0.566017	0	0	0	1.92329	0	4.92316	3.12904	0	1.12548
let-7f-AACTATACAATCTATTGCCTT	0	0	1.20665	0	0	0	0	0.808629	0.855418	1.06809	1.07366	1.52635	1.25226	1.63304	0.919039	1.10484	0	0	0	0	0	1.52841	1.47905	0.734603	0	0	3.36894	1.79944	2.80447	4.57823	0	0	0	0.74308	0.684499	0.864909	1.23688	1.04068	0.628569	0	0	0	0	2.13699	2.78603	7.77344	3.12904	6.627	0.675285
mir-196b-AGGTAGTTTCCTGTTGTTGGG	0	0	0	0	0	0	0	0	0	0	0	0	0	0	0	0	0	0	0	0	0	0	0	17.3634	16.5976	22.9239	0	0	0	0	0	0	0	0	0	16.145	15.6672	13.6775	0	0	0	0	0	0	0	9.069	3.12904	5.09771	0
mir-384-TGTAAACAATTCCTAGGCAAT	351.737	798.464	648.941	478.35	641.776	350.247	336.763	302.965	344.021	425.9	457.991	617.809	603.592	568.726	667.75	1120.25	723.24	319.726	662.372	672.826	441.356	908.287	554.746	6.67822	6.21582	7.49189	0	1.79944	2.37303	0	5.04453	4.0778	6.66908	5.119	4.65458	1.29736	1.78661	0	0	0	0	0	0	0	0	4.66405	3.12904	5.35258	0
mir-411-TATGTAACACGGTCCACTAAC	84.4855	120.036	105.583	228.314	251.351	133.532	29.9976	21.8329	105.929	115.888	112.887	116.148	100.36	99.6166	87.3745	123.374	100.868	152.9	251.457	241.557	117.064	120.862	112.102	4.54119	2.84341	5.05863	2.33235	3.149	3.45167	3.43369	2.2529	2.11632	3.09636	1.1559	2.32729	0.864909	0	0.892013	0	0.636767	0.589494	0	1.70763	1.70959	0	5.95963	3.12904	3.05862	0
mir-129-CTTTTTGCGGTCTGGGCTTGC	559.532	831.808	516.449	1226.36	1483.09	829.682	479.353	482.66	658.529	729.906	777.48	707.428	465.262	541.326	613.066	742.27	556.038	999.013	1656.88	1800.43	758.531	892.533	748.35	19.3001	18.4491	22.0916	0	0	0	0	9.69725	11.7172	13.4572	9.24716	7.75763	11.6763	12.094	5.79808	1.99047	0.495267	0	0	0	0	0	0	2.93349	0	0
mir-133a-CTGGTAAAATGGAACCAAATC	0	0	0	0	0	0	0	0	0	0	0	0	0	0	0	0	0	0	0	0	0	0	0	0	0	0	0	0	0	0	0	0	0	0	0	0	0	0	0	0	0	0	0	0	0	0	2.93349	0	0
mir-137-ATTGCTTAAGAATACGCGTAG	452.949	796.537	737.147	464.164	514.641	253.777	22.3968	20.9344	266.035	253.137	273.322	913.338	659.364	629.451	374.377	506.693	314.718	372.462	676.603	736	345.405	307.975	283.57	12.8221	10.2495	16.3284	0	0	1.29437	0	10.3829	8.46529	12.5045	9.16466	9.12667	0.864909	1.64918	0	13.3047	7.00444	15.1058	0	0	0	2.35741	0	2.93348	2.80374	0
mir-148b-GAAGTTCTGTTATACACTCAG	4.15101	5.77953	7.7226	10.1965	9.63678	5.40084	2.43223	2.24619	4.13451	5.34045	4.90815	7.12297	5.67992	5.86689	3.74181	6.13801	5.47962	5.87858	9.86106	10.1986	7.03792	7.75961	6.93625	8.01388	6.54645	7.42786	5.7013	2.69915	3.02021	4.57826	5.77918	7.53616	7.02635	6.77025	7.07313	7.20757	8.79562	9.21748	5.76188	4.66964	4.64228	5.97027	4.43984	4.70138	6.85791	5.18229	2.93348	4.58793	2.70114
mir-330-CAAAGCACAGGGCCTGCAGAG	260.171	435.095	396.628	436.233	481.574	288.666	74.2843	67.6552	254.915	261.815	288.967	441.479	362.665	370.461	401.162	569.668	450.698	319.441	515.24	551.293	377.468	657.862	461.923	13.5568	12.8284	15.0479	3.88724	4.49857	5.60896	8.01195	5.87712	6.40059	4.64454	6.0272	4.01571	20.4695	23.6382	19.0296	5.34283	2.33481	2.87379	21.4488	17.0763	20.515	21.2166	3.6276	2.93348	4.58793	1.87579
mir-126a-ATTATTACTTTTGGTACGCGC	0.732532	1.77832	2.05132	1.99497	1.76823	1.30365	1.21612	1.07817	1.56827	2.4032	2.30069	2.03513	1.47589	1.33064	0.853398	1.78003	1.58621	1.76927	1.68086	2.26635	1.48578	2.41018	2.34609	2.07025	1.65314	2.24117	14.2532	15.2952	9.92355	12.5902	2.05699	2.27118	2.50091	3.22001	2.73798	7.64003	7.42131	6.24409	4.50474	2.97158	4.4949	29.1878	29.0297	31.2	39.6473	6.73697	2.93348	6.627	1.20051
mir-425-ATGACACGATCACTCCCGTTG	2.93012	5.18676	4.22329	6.76075	6.45401	3.97303	2.1282	1.43756	1.56827	3.73832	3.22097	5.81466	4.65128	4.95963	4.26698	4.41938	3.31662	3.08197	6.38728	7.08237	4.06635	5.52579	4.89618	13.0225	10.6463	12.3585	8.03364	3.59888	5.39324	6.29509	13.2235	12.8528	13.1	12.4673	10.2675	11.388	11.6816	11.4475	4.19046	2.75932	2.87379	4.2013	4.95212	5.34246	4.92914	2.59115	2.93348	2.80374	6.1526
let-7f-CTATACAGTCTACTGTCTTTC	7.32532	9.18796	7.84326	16.7356	15.9139	6.95281	9.32356	7.18782	11.263	12.016	10.5832	14.7548	9.8392	11.0684	6.89282	11.3553	8.21941	7.02008	14.2313	13.9759	9.93132	14.3435	9.18033	4.80832	3.63692	5.1867	15.0307	13.4957	16.3955	18.8853	3.86911	3.2003	3.57272	4.12822	4.19825	9.80231	11.6816	8.17679	4.08569	4.95262	4.34753	8.40258	7.85509	6.41096	12.43	8.80991	2.93348	3.82327	6.00254
mir-451a-GTTACCATTACTGAGTTTAGT	0	0	0	0	1.50299	0	0	0	0	0	0	0	0	0	0	0	0	0	0	0	0	0	0	0	0	0	19.4362	6.29801	19.1999	33.7647	0	0	0	0.74308	0.638864	9.65813	8.93305	20.9624	3.98093	9.62227	5.8213	7.5181	5.80593	10.0438	10.9298	4.40495	2.93348	3.31351	4.27681
mir-93-ACTGCTGAGCTAGCACTTCCC	6.3486	6.66869	6.39528	18.0656	15.5604	9.56012	4.05372	4.13298	4.27709	7.2096	7.05546	10.0303	5.99299	7.92332	5.71118	8.16356	7.42633	7.76198	16.5845	14.1647	11.4953	12.58	11.6794	9.28268	7.86895	8.38833	3.88724	2.24929	5.82468	5.15053	6.5628	6.4006	5.35909	6.19233	4.97401	6.48682	9.48278	9.06877	3.03808	2.97158	4.34753	6.63363	6.31822	5.55616	7.28653	5.18229	2.93348	4.84281	5.85247
mir-1964-CCGACTTCTGGGCTCCGGCTT	1.34297	1.92651	1.56865	1.55165	3.09438	1.30365	1.11477	2.06649	0.997985	1.33511	1.38041	2.39855	1.6995	1.33064	1.64114	1.41174	2.09091	1.19855	2.57732	2.92739	2.97157	3.46831	2.8051	2.53772	2.51278	2.4973	3.36894	4.94844	1.29438	0	2.59573	2.6325	2.85818	2.88975	2.00786	4.32454	3.84809	4.90607	1.46666	0.566017	1.17899	3.53794	1.3661	3.84658	4.07188	0	2.93348	3.05862	2.77617
mir-151-ACTAGACTGAGGCTCCTTGAG	3.41848	2.22289	3.25797	4.65495	3.97849	2.04859	1.11477	1.16802	3.13653	1.2016	2.60745	4.50636	2.8176	2.9032	2.56019	2.51659	2.30721	1.88343	2.9135	3.39955	3.98815	6.05485	3.62113	1.80312	2.51278	2.43327	2.33234	1.79944	0	4.57826	2.88958	2.3228	2.97727	2.31181	2.19039	3.74793	4.3978	4.60873	1.15238	0.566017	0.663185	5.97027	4.26905	5.76986	6.64361	3.6276	2.93348	3.05862	1.05044
mir-301b-CAGTGCAATGGTATTGTCAAA	14.7727	29.7868	17.7379	32.2521	34.6571	15.023	3.74968	3.32435	19.3894	19.2257	25.3077	15.7723	15.9664	14.0926	30.7879	53.6461	50.0376	24.3133	42.9179	40.8889	26.1967	70.9534	41.1585	19.5003	16.3331	17.0969	3.10979	0	3.02021	0	18.8068	17.8597	18.9354	19.8155	12.3666	1.87397	1.92404	2.52737	0.942854	1.06128	0.736871	3.75906	4.43982	6.19726	5.57206	2.85026	2.93348	2.54884	16.2819
mir-1291-ATGGCTCTTACTGAAGACTAG	0	0	0.965322	0	0	0	0	0	0.855418	0	0	0	0	0	0	1.22761	0.793104	0.970251	1.34469	0	0.860191	0	0	0	0	1.08857	0	0	1.94156	4.00596	0.73464	0.774263	1.31	0.908209	1.46026	2.88303	3.29836	1.18935	0.838092	1.20278	1.32637	5.52803	2.21991	4.27398	3.42896	4.92318	2.93348	2.80374	8.17846
mir-320-GAAAAGCTGGGTTGAGAGGGC	1.95342	2.22289	2.17198	2.77079	4.86261	2.79353	8.20876	6.01978	1.71084	2.13617	1.84056	3.12537	1.65478	2.78223	1.44421	3.92832	3.10031	2.45416	4.14613	5.9492	4.14455	5.23187	5.5592	1.20208	2.44665	2.3052	5.44215	3.59886	9.49208	4.57826	0.73464	1.65177	1.19091	1.23846	0.684499	2.73888	1.78661	1.78403	0.838092	0	0	5.74915	3.07374	6.83834	3.85757	3.10937	2.93348	2.03907	0.900381
let-7i-TGCGCAAGCTACTGCCTTGCT	2.1976	1.63012	1.20666	6.98239	4.15531	1.55196	3.54701	2.51573	2.42369	3.07075	3.83449	3.0527	3.04121	2.84273	0.984686	2.45521	2.09091	1.42684	3.58584	1.7942	2.97157	3.82103	1.58106	2.13703	1.12414	1.60083	3.88724	1.79944	3.02021	0	1.51825	1.39368	1.66728	2.22924	1.00393	2.88303	1.92404	1.93269	0	0.566017	0	3.75906	4.26908	5.34246	3.85757	0	2.93348	2.03907	1.57567
mir-10b-AGATTCGATTCTAGGGGAATA	0	0	0	0	0	0	0	0	0	0	0	0	0	0	0	0	0	0	0	0	0	0	0	0.868165	0	0.83243	0	0	0	0	0.636689	1.03236	0	0	0.638864	10.5231	12.2314	8.32542	0	0	0	0	0	0	0	2.59115	2.93348	2.29397	0
mir-1934-TCTGGTCCCCTGCTTCGTCCT	0	0	0	1.44082	1.41457	0.931176	0	0	0	0	0	1.30829	0	1.0887	0.984686	1.22761	1.29781	1.42684	1.56881	2.17193	1.25119	1.46962	1.58106	0.868165	0	0.960496	0	0	0	0	0.881566	1.03235	0.952727	0	0.684499	1.15321	1.78661	1.93269	0	0	0	0	0	0	0	3.88671	2.93348	2.29397	0.675285
mir-378a-GCTCCTGACTCCAGGTCCTGT	0	0	0	0	0	0	0	0	0	0	0	0	0	0	0	0	0	0	0	0	0	0	0	0	0	0	1.5549	0	2.58874	0	0	0	0	0	0	0	0	1.48669	0	0	0	0	0	0	0	2.33203	2.93348	2.29397	0
mir-653-TTGAAACAATCTCTACTGAAC	0	3.70482	3.74063	0	0	0	0	0	0	0	0	0	0	0	4.13569	14.3629	3.53291	0	0	0	0	1.29326	1.37705	0	0	0	0	0	0	0	0	0	0	0	0	21.0462	16.9041	13.5288	0	0	0	22.1121	25.7853	29.063	24.0028	12.4375	2.93348	7.13678	0
mir-1a-TATGGAATGTAAAGAAGTATG	0	0	0	0	0	0	0	0	0	0	0	0	0	0	0	0	0	0	0	0	0	0	0	0	0	0	2.85064	0	0	0	0	0	0	0	0	0	0	0	0	0	0	0	0	0	0	0	2.93346	0	0
mir-122-AACGCCATTATCACACTAAAT	0	0	1.93064	0	0	0	0	0	0	1.33512	0	0	0	0	0	0	0	0	0	0	0	0	0	0	0	0	0	5.84815	0	0	0	0	0	0	0	0	0	0	1087.53	820.649	1016.37	3.53794	0	0	0	0	2.73791	0	0
mir-551b-GCGACCCATACTTGGTTTCAG	677.103	968.736	729.424	903.501	900.378	487.193	43.3748	42.0485	257.766	321.629	321.484	2239.59	1690.34	1902.57	457.092	746.627	469.878	236.741	714.366	882.653	480.69	974.184	568.416	7.07891	6.94318	7.81206	0	0	0	0	2.64471	2.99383	5.00182	3.13744	2.60108	37.1911	34.2205	44.0059	11.419	7.35819	12.7479	4.2013	6.83052	5.34246	10.0726	5.95963	2.73791	2.03907	2.10089
mir-10a-ATACCCTGTAGATCCGAATTT	0	0	3.8613	0	0	0	0	0	0	0	0	0	0	0	0	0	0	0	0	0	0	0	0	12.1544	12.4978	14.9837	2.07319	3.59886	4.74605	3.43367	35.9974	56.4181	73.3599	26.5857	24.1399	182.64	183.334	141.235	6.07613	5.80166	7.29502	32.2836	25.2728	30.3451	35.7898	7.51433	2.73791	6.11723	4.95209
mir-1981-CATCTAACCCTGGCCTTTGAC	7.81365	10.3735	12.4286	8.09074	9.10634	5.77331	1.92551	1.07817	8.4116	8.01067	9.20277	6.68688	6.79803	6.22978	9.1248	9.88217	8.57996	6.44932	10.1972	11.3318	4.84835	7.52448	6.17122	2.53772	1.91765	1.7289	2.85064	0	1.94156	2.8614	1.71416	1.80662	1.31	4.78874	3.87881	9.2257	8.65819	10.2582	5.55234	2.75932	2.35798	1.99009	0	3.41919	2.35741	2.33203	2.73791	3.56839	1.4256
mir-20a-AAGTGCTTATAGTGCAGGTAG	0	0	0.844662	0	0	0.807022	0	0	0	0	0	0	1.38643	1.20968	0.919045	0	1.2257	0	1.34469	1.41647	0.938388	0	0	7.67995	6.28195	6.53139	5.96045	2.69915	4.53031	8.01193	8.52182	7.7427	10.8372	8.09128	7.0275	6.34267	4.53524	4.3114	3.66665	3.5376	3.75804	3.53794	4.61059	7.47945	9.64395	4.92316	2.73791	4.07816	7.35311
mir-450b-ATTGGGAACATTTTGCATGCA	1.58715	0	1.68932	1.32998	0	0	0	0	1.56826	1.46862	1.07366	1.52635	0	1.20968	0.853391	1.59588	0.8652	0.799031	0	1.51091	1.25119	1.52841	0.867031	2.27059	1.25639	1.79293	7.25619	7.64758	7.76625	8.58422	2.05699	2.01309	1.42909	2.22924	2.41856	10.3789	12.094	11.2989	3.03808	2.47632	3.16854	12.825	19.4669	16.4548	21.0024	5.70052	2.73791	5.35258	2.17592
mir-3068-ATTGGAGTTCATGCAAGTTCT	11.8426	13.3373	13.5145	19.1739	19.5388	9.68427	5.26983	4.85176	11.4056	13.0841	12.117	17.8074	14.1775	16.27	10.5033	15.7133	11.6802	8.90349	19.0498	19.1696	12.981	19.5166	11.7304	2.6045	3.37242	4.0341	3.62809	5.39828	3.45167	4.57826	2.00802	2.11633	2.73908	2.14668	1.50589	7.92834	7.97104	7.1361	2.93332	2.40556	2.65273	4.42242	3.07373	5.98357	6.4293	7.51433	2.73791	5.09769	2.02586
mir-342-AGGGGTGCTATCTGTGATTGA	27.7141	49.6447	37.2857	50.2068	69.049	46.3727	16.823	13.1177	25.52	31.5086	36.8111	42.011	26.5659	23.7699	43.2606	63.6512	42.1066	47.8276	81.6899	76.0177	40.6635	46.5577	45.1366	2.27059	2.11602	1.85697	3.62809	5.3983	1.94156	0	2.79164	6.86517	3.69181	3.96308	3.69628	2.30642	2.6112	1.93269	1.25714	1.41504	1.76849	6.63363	5.80593	7.05205	8.5724	2.33203	2.73791	4.33304	17.4074
mir-677-TTCAGTGATGATTAGCTTCTG	2.68595	5.18675	4.94729	3.98996	4.15533	1.92444	1.72283	0.898476	2.42369	3.60479	2.91421	4.94247	4.02514	5.98785	5.38296	10.3119	7.21	1.82636	3.92201	4.15499	3.98815	6.46634	4.18215	0.868165	1.32251	1.5368	2.07319	2.69915	1.5101	3.43369	1.37133	1.29044	1.78636	1.65129	1.23209	3.17133	3.98551	4.90607	1.04762	1.13203	1.6948	0	0	0	0	2.85026	2.73791	0	0.600254
mir-503-AGCAGCGGGAACAGTACTGCA	1.22089	2.0747	1.93065	1.77331	0	0	0	0	2.28111	0	0	1.38098	1.34171	0	1.18162	1.47312	0.865207	1.02732	0	2.07749	1.87678	0	1.22404	1.80311	0.925762	1.79293	5.7013	7.64758	6.90333	6.29509	1.12644	0.825883	0.952727	1.23847	1.23209	8.79327	10.7196	6.98744	0.942854	1.13203	1.6948	15.0362	10.7581	15.6	17.1448	3.36848	2.73791	2.03907	1.27554
mir-125b-ACGGGTTAGGCTCTTGGGAGC	15.139	16.3013	18.9445	20.8364	22.9868	13.5952	7.60075	7.09791	12.4035	10.4139	14.8778	14.7547	15.8322	12.9434	17.5275	23.3244	21.1975	12.0425	24.0924	27.5741	19.5498	28.0404	23.5119	3.33911	2.64503	3.97006	1.5549	4.04872	3.6674	0	2.15494	2.27118	2.5009	1.23847	1.18646	1.15321	1.78661	1.78403	0.838092	0.636767	0.95793	2.21121	3.41526	4.70136	4.0719	4.40495	2.73791	0	0.825349
mir-1a-AATGTAAAGAAGTATGTATTT	0	0	0	0	0	0	0	0	0	0	0	0	0	0	0	0	0	0	0	0	0	0	0	0	0	0	5.7013	5.84815	3.66739	9.15649	0	0	0	0	0	0	0	0	0	0	0	0	0	0	0	9.58723	2.73791	1.91163	0
mir-365-GAGGGACTTTCAGGGGCAGCT	0	0	0	0	0	0	0	0	0	0	0	0	0	0	0	0	0	0	0	0	0	0	0	0	0	0	0	0	0	0	0	0	0	0	0	1.58567	1.92404	1.04068	0	0	0	0	0	0	0	0	2.73791	2.03907	0
mir-434-AGCTCGACTCATGGTTTGAAC	155.663	243.186	217.198	258.681	269.918	132.351	51.8876	51.8419	173.08	189.986	186.817	178.511	194.593	167.902	208.36	330.655	215.075	150.275	282.833	288.584	149.595	268.588	168.816	5.40935	6.01745	8.00416	1.81404	0	3.45167	0	2.84061	3.14869	4.88272	3.7154	3.23995	0	2.06147	0	0	0.495262	0	2.43233	0	1.92329	2.35741	5.70052	2.73791	4.33306	0
mir-376b-GTGGATATTCCTTCTATGGTT	241.979	381.153	303.715	450.42	459.118	202.314	131.746	104.852	302.248	343.124	364.43	274.816	335.025	287.417	250.438	472.32	258.984	226.696	478.038	451.194	222.477	302.449	217.777	7.27925	6.21582	9.92513	5.70128	2.24929	4.09886	6.29509	5.82815	4.80044	6.31182	4.54105	4.47204	1.72982	3.0235	2.23003	1.3619	0.990525	0	3.31682	3.41525	2.99179	3.00034	10.1055	2.7379	5.86234	0.825349
mir-344-TGATCTAGCCAAAGCCTGACT	445.99	1400.57	795.427	1854.99	1929.12	878.29	401.926	372.417	359.703	436.047	437.438	783.889	523.448	534.492	803.832	1420.83	887.193	1195.86	2308.16	2325.28	1112.3	778.254	915.531	4.4744	4.62881	6.21123	0	0	2.80449	0	3.23242	3.35516	5.24	2.97232	2.37293	5.0453	7.14644	3.71672	0	0	0	7.7392	9.56272	9.83012	8.14377	4.40493	2.54236	0	0
mir-19a-GTGCAAATCTATGCAAAACTG	1.22088	1.03735	1.32732	2.54914	1.59139	1.24157	0	0	1.28313	1.60213	1.53379	2.1805	1.61005	1.20967	1.50985	2.02555	1.3699	0.8561	2.12909	1.69978	2.73697	2.99804	2.34609	21.9045	21.0942	21.0029	11.9209	8.54731	12.0808	15.4516	29.2388	30.8158	33.9409	31.0442	28.7945	13.6944	16.4918	12.3395	9.42854	8.70246	11.6425	12.825	13.661	19.0192	19.0736	8.29166	2.54235	6.627	18.983
mir-101b-TCGGTTATCATGGTACCGATG	0	0	0	1.77331	2.3871	1.05534	0	0	0.855418	0	1.38041	0	1.16282	1.75402	0.919039	1.5345	0	0	1.45674	1.69978	0.938388	0	1.42805	0	0	0	0	0	1.94156	0	0	0	0	0	0	0	0	0	5.23807	4.88186	4.78965	0	0	0	0	3.36848	2.54235	3.56839	0.600254
mir-219a-GATTGTCCAAACGCAATTCTC	2.68595	3.55663	3.1373	6.20658	6.80764	3.16601	2.8376	1.5274	1.85341	2.93725	3.52773	4.57905	4.33821	4.65722	2.36324	4.23523	3.38872	3.65271	6.16316	6.42136	4.53555	3.93859	4.13115	4.20727	2.51278	2.6894	8.29279	5.3983	6.90333	8.01193	3.86911	3.2003	3.57272	4.12822	3.14869	6.19851	7.28389	5.64942	3.56189	3.04233	3.53698	3.53794	3.75678	4.70136	3.64327	4.14582	2.54235	3.05862	3.90165
mir-324-CCACTGCCCCAGGTGCTGCTG	27.592	32.6025	30.4077	40.0103	47.4767	22.9691	16.7216	12.7583	18.2489	25.1001	24.0806	52.6228	35.5106	40.2215	30.1971	45.1144	31.1473	30.4773	57.0373	56.1869	31.9052	36.5642	31.7231	7.21247	7.53838	7.04365	4.14638	2.69915	2.58875	4.57823	6.02405	6.7103	6.90726	4.29335	3.37685	14.5593	17.3164	16.5022	3.56189	1.9103	2.06324	11.4983	9.39194	12.6082	12.0014	3.6276	2.54235	0	2.40102
mir-362-ATCCTTGGAACCTAGGTGTGA	4.39519	3.85302	4.2233	5.98491	6.54241	3.22808	1.31746	2.06649	2.56625	3.6048	3.98788	5.2332	3.48846	4.47577	4.39826	6.69043	4.10971	3.31026	6.38728	6.79909	5.63034	8.40624	5.86521	5.74327	6.08357	5.31476	5.96045	6.74786	3.66739	6.29509	4.21194	3.92295	4.76364	3.96309	4.19825	7.35172	8.24589	8.47414	3.35236	1.7688	2.72642	7.29698	7.17203	6.62464	7.50084	5.4414	2.54235	6.37213	4.65197
mir-193a-ACTGGCCTACAAAGTCCCAGT	0	0	0	0	0	0	0	0	0	0	0	0	0	0	0	0	0	0	0	0	0	0	0	0	0	1.08856	0	0	0	0	0	0	0	0	0	4.18039	2.88607	4.3114	2.82856	2.68857	3.02117	1.76897	1.53687	1.92329	2.35741	4.14582	2.54235	3.05862	0
mir-6516-TTTGCAGTAACAGGTGTGGAC	4.2731	4.2976	3.98197	6.20658	7.86858	4.40758	1.92551	1.97665	3.70681	5.60747	6.59533	6.75955	5.09852	6.16932	3.54487	4.84903	3.67711	3.53856	6.6114	7.7434	4.30095	6.23121	5.15119	1.00173	0	1.28067	3.62809	2.24929	1.5101	2.8614	0	0.929122	0	0	0	1.00907	1.09945	1.33802	2.51428	0.636767	1.17899	1.76897	0	2.99179	0	3.10937	2.54235	2.80374	0.975412
mir-125a-CCTGAGACCCTTTAACCTGTG	13.3077	20.3025	21.9612	20.0606	24.4898	12.1674	14.2893	14.6451	16.2529	22.2963	22.24	24.6396	18.1579	22.9837	15.1642	23.6313	16.2947	15.524	24.8768	26.0631	13.5285	21.1626	16.3715	4.40762	5.48844	3.90603	5.96045	6.74787	5.8247	9.72876	2.39983	2.16794	2.5009	2.64206	1.91659	14.1268	14.2929	10.4068	1.78095	1.20278	1.98955	11.056	10.7581	11.7534	11.5727	6.73699	2.54235	5.35258	1.35057
mir-3068-TGGAGTTCATGCAAGTTCTAA	5.00563	8.74339	9.1706	9.53154	12.2007	5.525	1.52014	2.33603	5.27507	8.27769	6.74869	11.702	8.76587	11.1895	5.38296	11.785	7.78682	6.22101	10.5334	8.97102	6.64693	13.0503	8.36429	3.0052	1.85152	2.04906	5.44213	2.69915	3.02021	0	2.30188	1.34206	1.31	1.73385	1.27773	3.45964	3.71065	4.16273	1.78095	1.48579	1.17899	2.87457	1.87839	4.48768	4.92914	2.59115	2.54235	0	2.77617
mir-181c-ACCATCGACCGTTGAGTGGAC	35.5278	39.4193	41.2677	29.8138	25.816	10.4913	32.1257	30.8177	46.6202	53.6715	54.603	56.475	39.0886	42.7012	26.9804	53.3393	27.3981	10.3303	27.0058	25.0244	22.0522	55.7281	26.878	14.4249	11.4397	14.9198	29.0248	21.1434	22.0044	31.4755	12.7827	11.8721	13.8146	12.4673	10.6781	11.8204	11.2694	10.4068	1.67618	1.13203	0.736871	15.4785	14.8564	15.8137	20.5737	6.21874	2.54235	4.58792	3.45146
mir-700-CACGCGGGAACCGAGTCCACC	10.3775	26.2301	17.9792	49.9851	53.4002	27.4388	23.917	20.036	8.26904	11.2149	11.3501	13.301	10.0629	9.43541	25.9301	40.9406	30.7147	27.3382	49.4175	53.6372	32.9219	39.0332	36.8744	9.68335	9.38986	10.6295	7.77449	5.84816	7.33479	6.29509	4.94658	4.6456	6.78817	3.9631	2.87489	9.2257	8.52076	10.2582	1.46666	0.495262	0.663185	5.97025	2.73221	5.34246	5.35773	4.14584	2.54235	2.80374	0
mir-214-CAGCAGGCACAGACAGGCAGT	0	0	0	0	0	0	0	0	0	0	0	0	0	0	0	0	0	0	0	0	0	0	0	4.4744	4.16592	4.03409	7.51534	5.84815	6.68761	8.01193	3.03652	3.56162	3.69182	3.79797	2.82925	4.18039	3.84809	2.08136	1.25714	0.778271	1.17899	6.85475	5.80595	6.83835	5.57206	2.85026	2.54235	0	1.12548
mir-34a-AATCAGCAAGTATACTGCCCT	3.90683	0	8.80861	2.32747	2.03345	1.36573	6.99267	8.89492	8.12646	9.21227	10.7366	1.7444	1.25227	1.20967	1.96937	3.31453	4.25392	0	1.68086	1.98307	3.75355	8.81775	4.89618	2.07025	1.05801	1.7289	9.07023	6.74787	7.55052	6.86739	0	0.72265	0	0.990771	0	4.46869	4.8101	7.1361	1.25714	0.636767	0	7.07587	5.80593	7.05204	4.71483	3.6276	2.54235	3.56839	1.20051
mir-92a-ATTGCACTTGTCCCGGCCTGA	0	0	0	0	0	0	0	0	0	0	0	0	0	0	0	0	0	0	0	0	0	0	0	0.801388	1.52089	1.21663	1.81405	0	1.72584	0	7.39536	8.15556	9.28908	3.46771	2.41855	3.31549	3.98552	2.67604	0.838092	1.13203	1.03162	2.65345	0	2.99179	0	0	2.54235	2.54884	2.77617
mir-677-CTTCAGTGATGATTAGCTTCT	0	0	1.20666	0	0	0	0	0	0	0	1.22704	0	1.11809	0	1.24727	1.65727	1.15361	0	0	0	0	0	0	1.26886	2.18215	1.7289	4.66469	4.94844	2.1573	15.4516	1.66519	1.18721	3.21545	2.14667	2.69235	2.16228	3.29836	2.3787	0.628569	0.707521	0.810557	0	0	1.92329	3.42896	3.88673	2.54235	3.31349	2.47605
mir-127-ATCGGATCCGTCTGAGCTTGG	236.852	316.096	250.261	662.664	648.406	324.92	120.902	103.234	236.808	243.524	283.905	311.884	270.803	277.861	246.631	313.285	241.824	421.374	695.429	679.72	293.403	306.328	267.147	7.88032	7.00933	8.9006	1.81404	2.2493	2.1573	3.43369	3.86911	4.02619	4.04909	2.39436	2.73798	1.29736	3.29836	1.04068	0	0.495262	0	2.21121	1.3661	2.35069	2.57172	13.4739	2.54235	7.39165	0.525222
mir-3061-CAGTGGGCCGTGAAAGGTAGC	0.854618	0	0	0	1.85663	0	0.810747	0	0.997985	1.46863	1.38041	1.67171	1.34171	1.8145	1.18163	0	0.793104	0.8561	1.45674	0	0.938388	1.93991	1.37705	0	0	0	0	0	0	0	0	0	0	0	0	0	0	0	0	0	0	0	0	0	0	2.59115	2.54235	3.31349	0
mir-489-AATGACACCACATATATGGCA	0.732532	4.1494	3.74064	0	0	0	0	0	0	0	0	0	0	0	4.20133	22.281	5.40752	0	0	0	2.18958	3.52709	2.04007	0	0	0	0	0	0	0	0	0	0	0	0	13.4061	14.5678	12.1909	0	0	0	22.5544	19.8085	29.2767	20.1451	5.4414	2.54235	2.54884	0
let-7g-CTGTACAGGCCACTGCCTTGC	18.9237	19.7096	18.5826	28.262	24.932	11.05	20.0659	19.9461	25.2348	26.1682	30.5224	23.4767	22.2724	24.5563	9.51866	21.0533	11.536	7.87614	22.8598	22.5692	17.2819	29.4513	14.9435	8.81528	8.66249	10.3734	18.6588	8.99718	8.84489	8.58422	8.32597	7.38136	8.45545	12.3846	10.0393	17.2981	17.3164	19.3269	12.1523	10.6128	10.0214	9.72931	10.9288	8.76165	10.9298	5.95963	2.54234	3.82328	2.92624
mir-374b-CTTAGCAGGTTGTATTATCAT	7.93575	17.0422	14.1179	15.1839	12.7312	6.64241	8.10747	7.90654	10.6928	10.2804	10.123	17.0806	12.8357	12.8225	9.38735	14.7312	8.14737	8.44683	14.1193	14.3536	9.38388	9.99344	8.41531	2.20381	1.98377	2.62536	8.81109	2.24929	5.1775	6.86736	3.37935	3.04545	3.93	3.7154	2.60108	5.76605	4.94753	4.3114	2.40951	1.41504	2.06324	6.19137	4.0983	3.41917	6.42928	8.29166	2.54234	4.58793	7.05298
mir-669d-ACTTGTGTGTGCATGTATATG	13.4297	37.493	24.7364	15.6273	14.853	6.70449	12.6678	10.1527	6.84334	8.01066	5.06153	19.5518	13.2383	13.7297	24.4203	38.2397	18.6739	9.58841	13.2228	18.131	16.9692	21.4565	16.5755	13.2228	11.5058	11.9102	6.73788	6.74786	7.11908	8.01193	7.39536	8.92983	8.81272	6.52259	5.56724	5.91022	7.55875	6.39276	1.67618	1.34428	1.98955	11.4983	12.2949	10.2575	9.64393	12.1783	2.54234	7.39165	26.7113
mir-701-TTAGCCGCTGAAATAGATGGA	1.83133	3.26025	4.10263	1.77331	1.50299	0	1.72283	1.43756	0.997985	1.60213	0	2.25318	1.92312	1.93547	2.56019	4.11248	2.16301	0.741955	0	1.7942	2.03318	3.64467	2.19308	1.06851	1.19026	1.7289	2.85064	3.59886	4.09886	7.43966	1.42031	1.54853	1.90545	1.56872	0.95829	2.88302	3.98552	2.23003	0	0	0	5.74913	3.58601	5.12876	4.28619	3.6276	2.54234	5.60746	0.900381
mir-669m-AGTTTTGTGTGCATGTGCATG	6.51139	16.1036	14.4799	9.23598	10.0199	3.84888	8.98575	6.10962	3.51672	3.73832	4.70365	11.387	7.18562	6.29027	12.9979	23.0788	11.9205	5.51711	9.33813	9.31727	9.59238	14.0692	11.0844	10.5071	10.9769	11.5687	7.77449	5.3983	5.1775	5.7228	6.92195	7.05439	6.03392	6.2749	5.26302	5.09334	4.39781	3.76628	0	1.1792	1.12986	9.28709	6.60283	7.83562	7.14369	5.70052	2.47715	5.60748	21.0089
mir-107-CAGCTTCTTTACAGTGTTGCC	19.5342	22.5254	22.0818	17.9548	17.9474	10.1809	8.31012	9.70354	14.2569	19.2256	19.9394	21.7323	18.0684	18.4474	15.558	25.4114	20.116	10.3874	19.7221	23.3246	14.154	29.5101	14.4335	3.94015	3.63691	4.4183	8.29279	6.74789	5.82468	9.72879	3.96706	3.35516	3.21545	2.97232	3.05742	18.7397	20.065	35.5319	15.3999	9.33924	8.03188	5.97027	4.0983	6.83837	6.4293	3.88671	2.34678	2.80374	1.87579
mir-17-CTGCAGTGAGGGCACTTGTAG	2.1976	2.0747	2.17198	1.66247	2.29868	1.17949	0	0	0.997985	1.86916	1.38041	2.39855	1.83367	1.87499	1.96937	2.20969	1.80251	1.48392	0	1.98307	1.48578	1.82233	1.12204	7.27925	6.61258	7.04366	2.85066	3.59886	2.80449	5.7228	7.49335	8.41369	7.86	7.34823	6.70804	7.49588	7.55874	7.87945	3.87617	1.7688	2.13692	5.52803	4.78136	4.48768	4.50052	4.14582	2.34678	3.05862	4.5019
let-7f-ATGAGGTAGTAGATTGTATAG	3.05221	3.40844	4.10263	4.87659	5.30465	3.53848	3.14163	2.96496	3.13653	4.67289	3.68112	5.30589	3.44374	3.02417	2.88842	2.94625	2.73981	2.1688	5.15465	5.00488	2.89337	4.05616	2.44809	1.93668	1.85152	2.3052	3.88724	3.149	3.88313	6.86739	1.37133	1.08397	0.952727	1.07334	1.50589	6.34267	3.98551	3.71672	2.61904	1.98105	2.57904	5.52803	3.75677	3.84658	3.21465	0	2.34678	0	1.87579
mir-181c-ACATTCAACCTGTCGGTGAGT	40.5334	52.4603	41.0263	30.7004	30.767	14.6505	51.5836	44.5643	60.5921	62.7503	55.9835	76.5356	50.0907	50.9874	43.917	71.8147	45.2069	17.5216	31.1519	33.8065	31.2796	68.2494	33.9162	16.8291	16.796	17.9293	32.6529	31.0402	20.9257	36.6259	18.4639	16.8274	20.96	15.1919	12.1384	13.5502	15.2549	10.2582	1.78095	1.7688	1.03162	18.353	17.0763	18.1643	24.4313	10.3646	2.34678	5.35258	7.35311
mir-339-CCCTGTCCTCCAGGAGCTCAC	0.732532	3.40844	2.41331	3.10329	3.53644	1.86236	1.52015	0	1.28313	1.73565	0	2.90734	2.28092	1.87498	2.10067	2.14831	1.87461	1.54099	1.90498	2.92739	2.18958	2.70411	2.55009	2.07025	1.38864	2.4973	5.44213	2.2493	2.1573	2.8614	1.12645	2.01309	1.66728	2.06411	1.82532	5.47776	5.6347	5.94675	1.3619	1.55654	1.40006	4.42242	4.26908	4.91506	5.14343	4.14584	2.34678	4.07814	2.25095
mir-195a-CCAATATTGGCTGTGCTGCTC	2.93012	1.63012	0.965322	2.32747	1.50299	0.993256	12.0598	10.5122	4.13452	3.47129	3.68111	5.37854	3.04121	3.08465	1.24727	1.5345	1.5141	1.0844	1.56881	2.26637	2.26777	3.40952	2.04007	4.54119	4.82718	4.93056	8.03365	4.04872	5.60896	7.43966	3.77116	3.66486	4.88273	4.29335	2.96615	5.76605	7.28388	5.79808	1.04762	1.34429	1.17899	10.3927	10.075	11.9671	15.216	4.14584	2.34678	3.31351	1.57567
mir-27a-GTTCACAGTGGCTAAGTTCCG	0.976705	1.18554	0	0	0	0	1.21612	0	0.997985	2.2697	1.53379	1.7444	1.47589	0	0.853398	0	0.8652	1.0844	0	0	0	1.11692	1.12204	4.34084	3.70305	3.842	9.07023	6.29803	5.60896	5.15053	1.46928	2.52927	2.38181	2.14668	1.04956	1.87397	3.29835	1.93269	0.942854	0.990525	0.736871	12.1616	10.4165	16.8822	12.6443	5.70052	2.34678	3.31351	0.975412
mir-92b-TATTGCACTCGTCCCGGCCTC	238.439	349.291	349.93	459.62	520.475	269.856	192.652	178.526	137.722	184.646	188.964	499.916	359.177	370.098	246.894	380.065	268.357	328.401	553.452	586.988	369.726	367.288	439.125	17.6972	18.2507	18.5697	0	1.79944	2.58875	0	3.6732	4.18103	6.31182	4.29334	4.24389	19.4604	21.7141	9.21748	0.733331	0	0	151.468	132.17	148.948	157.518	3.62762	2.34678	3.82327	1.05044
mir-467c-TAAGTGCGTGCATGTATATGT	1.0988	2.37109	1.68932	3.10329	2.4755	0.869103	3.14163	2.33603	0	1.06809	0	2.6166	1.65478	1.4516	2.03502	3.43728	1.5862	1.31269	2.24115	1.98307	2.42417	2.93924	1.88707	6.27752	6.81095	6.27526	2.33234	0	3.66739	3.43369	4.40784	4.49074	2.73908	3.7154	2.28166	2.45058	1.64918	2.08136	0	0	0	3.98018	3.92753	5.76988	4.92914	0	2.34678	2.80374	9.75412
mir-7b-TGGAAGACTTGTGATTTTGTT	651.343	1870.19	1364.24	860.943	773.153	386.129	99.8225	93.8907	314.65	263.952	292.188	892.624	1175.39	879.126	1308.72	2933.72	1123.75	895.886	1277.46	1361.79	612.22	585.733	523.125	170.628	170.274	213.487	0	4.04874	1.72584	0	89.5282	86.9759	101.347	79.2621	64.5708	1.44152	20.2024	0	0	0	0	4.64354	5.12288	3.63288	5.35775	4.40493	2.34678	0	0
mir-98-CTATACAACTTACTACTTTCC	6.22651	8.74339	8.20526	11.5265	8.22221	4.65589	3.85103	2.69542	5.41765	6.00801	5.67505	9.73957	9.03421	10.2822	5.97377	10.8643	7.6426	4.39466	8.74047	10.7652	7.50712	10.8164	8.46632	2.40416	2.71116	3.58586	1.81404	4.94844	4.74605	5.7228	3.52628	3.40677	2.85817	3.79796	3.83318	5.04531	5.08498	5.64942	2.40952	1.48579	2.21061	3.0957	2.39069	3.63288	5.57206	3.62762	2.34677	2.54884	1.50063
mir-143-AGGTGCAGTGCTGCATCTCTG	0	0	0	0	0	0	0	0	0	1.33511	0	0	0	0	0	0	0.721	0	0	0	0	0	0	21.9045	21.2264	26.7019	9.58853	10.3467	4.74604	7.43966	19.9822	18.4791	31.5591	13.7883	13.8725	7.64004	6.59672	5.64942	1.04762	0.778271	1.25268	4.64354	8.02585	8.76165	7.71517	4.14582	2.34677	3.31349	1.4256
mir-1943-AGGGAGGATCTGGGCACCTGG	1.34298	1.18554	0.844662	0	1.85663	1.30365	0	0.718782	0	1.06809	1.22704	1.7444	1.16282	0	0.722103	1.90278	1.3699	0.970251	2.46527	2.17193	1.48579	1.76355	1.83607	0	0	1.1526	5.70128	5.3983	3.6674	5.7228	0.783615	0	0	0.825641	0.867032	0.864909	1.23688	0	0.628569	0	0	2.87457	3.58602	3.41917	6.00068	4.40493	2.34677	3.56839	0
mir-337-TTCAGCTCCTATATGATGCCT	32.2314	52.0157	48.7489	227.538	191.852	87.0341	20.2686	19.1375	39.4918	40.1868	35.5841	41.4295	37.568	40.4029	44.5735	83.1087	59.8433	115.175	187.249	171.771	85.4716	53.4944	60.7431	7.01212	5.29007	7.42786	2.0732	0	2.1573	3.43369	3.72218	3.51	3.81091	3.13745	3.97008	1.00907	1.64918	0	0	0	0	0	0	1.92329	3.00034	17.3607	2.34677	6.8819	0
mir-409-AGGTTACCCGAGCAACTTTGC	135.518	220.066	183.17	304.343	272.66	131.917	20.1673	19.0477	147.417	126.702	123.93	177.784	193.431	161.793	161.817	189.543	125.166	216.309	325.303	300.198	133.017	139.085	104.91	4.07371	4.3643	5.69895	2.33235	0	2.1573	0	3.4773	4.02618	4.76363	2.88975	2.96615	0	1.09946	0	0	0.566017	0	0	0	2.56439	0	7.77344	2.34677	3.31349	0
mir-504-GACCCTGGTCTGCACTCTATC	1.46506	1.33374	3.25797	2.32747	1.85663	1.42781	0	0	1.28313	1.2016	0	6.68686	2.68343	3.62901	1.96937	2.1483	1.36991	2.16879	3.02555	3.21067	1.25119	1.70477	0.918033	0	0	0	2.07319	2.69915	3.02021	0	0	0	0	0	0	0	0	0	0	0	0	0	0	0	0	0	2.34677	2.03907	0
mir-497a-CAAACCACACTGTGGTGTTAG	5.73817	3.40844	4.82663	5.76326	4.50895	2.48314	16.4175	14.1959	8.55418	11.2149	9.35616	11.9201	9.92873	12.1572	4.52956	5.95387	5.04702	2.91075	4.81849	5.09931	5.86493	8.75896	5.20219	15.2931	14.746	18.6336	18.6588	8.99716	12.0808	13.1625	17.9252	15.2789	24.0564	19.5677	16.5192	19.028	22.5387	15.3129	2.82856	2.68858	3.90542	22.1121	22.3699	29.063	26.7888	9.58723	2.15122	5.60748	4.12674
mir-339-AGCGCCTCGGCGACAGAGCCG	2.31968	3.85302	3.25797	2.77079	2.74074	0.869103	1.01343	0.808629	2.56625	2.67022	1.99394	2.03513	2.95177	2.78223	1.57549	2.63935	1.1536	1.31269	2.57732	1.7942	2.50237	1.70476	1.83607	1.53599	1.45477	1.66487	5.44215	4.49857	2.58874	6.29509	2.00802	1.70339	1.07182	1.65129	1.73406	6.05436	5.08497	8.17679	1.78095	1.6273	1.6948	2.87457	5.12288	3.41919	4.07188	5.18229	2.15122	2.80374	2.62611
mir-669l-AGTTGTGTGTGCATGTATATG	2.93012	5.03857	2.53398	3.76829	4.33215	1.11742	4.56043	4.22282	0.855418	1.33511	1.99393	3.27074	2.28092	2.23788	4.00439	6.62905	4.61442	1.82636	4.4823	3.11625	3.67536	5.52579	4.28416	4.14049	3.24017	4.29023	2.85066	2.69915	2.37302	0	1.91007	3.2003	1.54818	1.56872	1.41463	2.16227	1.23688	1.33802	0.838092	0.566017	0.589494	3.0957	2.04915	2.77809	3.42896	2.33203	2.15122	3.82327	7.35311
mir-133b-GTTTGGTCCCCTTCAACCAGC	0	0	0	0	0	0	0	0	0	0	0	0	0	0	0	0	0	0	0	0	0	0	0	0	0	0	0	0	0	0	0	0	0	0	0	0	0	0	0	0	0	0	0	0	0	3.10937	2.15122	2.80374	0
mir-143-GTGCAGTGCTGCATCTCTGGT	0	0	0	0	0	0	0	0	0	0	0	0	0	0	0	0	0	0	0	0	0	0	0	10.8187	8.59633	10.4374	3.10981	2.24929	1.5101	0	5.28942	5.93603	7.97909	5.86207	4.70021	1.58567	1.23688	1.78403	0	0	0	2.87457	2.56145	2.56439	2.78603	0	2.15122	0	0.750317
mir-483-AAGACGGGAGAAGAGAAGGGA	1.22088	0	0	0	0	0	1.92551	2.42588	0.997985	2.93724	1.53379	0	1.07338	0	0	0	0	0	0	0	0	1.29326	2.04007	0	0	0	1.81405	0	1.29437	3.43369	0	0	0	0	0	3.45964	4.67268	0	0	0	0	0	0	0	0	5.95965	2.15122	0	0
mir-374b-TATAATACAACCTGCTAAGTG	2.80804	4.2976	3.98197	3.10329	3.62485	1.80028	3.04029	3.05481	1.71084	2.53671	1.68717	6.25076	3.71208	4.05238	3.01971	3.56006	2.59561	3.13904	3.80995	5.3826	2.97157	3.29196	2.95811	8.88202	5.95132	7.49189	9.32938	5.3983	6.47187	8.58422	10.0401	10.3236	8.93182	11.3939	9.67422	18.4514	14.1554	10.1095	6.18094	4.31586	4.27385	13.9306	13.3195	11.7534	12.8586	6.21876	2.15121	3.82328	7.42814
mir-19b-AGTTTTGCAGGTTTGCATCCA	1.0988	1.18554	1.32732	2.43831	2.56392	1.05534	0	0.898476	1.28313	2.13618	1.99394	2.5439	1.56534	1.51208	1.83808	1.5345	1.44201	0.913175	2.1291	1.69978	1.79858	1.82233	2.24408	7.81351	6.21582	7.1077	9.58853	5.3983	6.25614	8.01193	9.50133	9.44602	9.40822	9.16466	7.07313	8.64909	7.00901	6.83877	4.81902	3.6791	5.89494	6.41251	5.29364	6.41096	6.85791	5.95963	2.15121	3.05862	6.97795
mir-210-TGTGCGTGTGACAGCGGCTGA	3.29639	2.81567	3.37863	5.98493	5.74672	2.35899	1.21612	1.8868	3.99195	4.93991	5.52166	3.99758	3.5779	3.32659	2.75713	5.46283	3.38872	3.13904	3.69789	6.13807	5.39574	7.87718	6.63024	23.3738	23.4085	24.8449	9.58854	10.3467	7.98198	16.5962	2.35085	2.73574	2.97727	1.81642	2.00786	7.49588	7.14644	4.01406	2.82856	1.69805	3.24222	7.96036	3.58601	7.47945	6.85791	9.069	2.15121	3.31349	1.87579
mir-18a-AAGGTGCATCTAGTGCAGATA	0.854618	0	1.80998	0	1.32617	0	0	0	0	1.33512	1.07366	0	0	0	0.853398	0	0	0	1.34469	0	0.860191	0	0.918033	11.7537	9.98499	9.41286	2.33234	2.69915	3.45167	3.43367	19.1007	19.5631	23.8181	21.9621	17.7969	4.03624	5.63469	4.01406	2.19999	1.9103	3.61066	2.87457	3.75678	2.56439	6.4293	0	2.15121	0	5.85247
mir-28a-CCACTAGATTGTGAGCTGCTG	0	0	0	0	0	0	0	0	0	0	0	0	0	0	0	0	0	0	0	0	0	0	0	2.87163	2.90954	2.6894	3.62809	1.79942	2.1573	2.8614	2.59573	1.60015	3.09636	1.98155	1.50589	1.00907	2.19891	2.52737	1.67618	0.778271	1.10531	2.43233	0	0	2.35741	3.36848	2.15121	0	0.600254
mir-23a-CACATTGCCAGGGATTTCCAA	1.95342	0	1.20666	2.32747	2.29868	1.1795	0	0	1.99598	2.93725	2.30069	1.88976	1.61005	1.63305	0.984686	1.71865	1.15361	1.31269	1.79291	2.73852	1.09478	2.41019	1.73406	8.5481	8.53024	8.58043	7.51534	7.64758	7.55052	8.01193	3.77116	4.59397	6.31181	3.05488	1.87096	6.19851	4.67268	4.46007	1.57142	0.778271	1.91586	9.50819	7.00127	10.0438	10.2869	5.4414	2.15121	3.56839	1.05044
mir-3068-GGTGAATTGCAGTACTCCAAC	9.64502	12.4483	13.9972	15.9598	14.9414	9.62216	3.547	2.87512	9.55218	13.3511	8.58925	18.3888	13.4619	14.9999	11.0942	17.8003	11.0314	8.90349	16.2483	16.8089	11.6517	16.1658	10.2514	1.53599	1.19026	1.60083	2.07319	1.79944	3.88312	2.8614	0.979524	1.03236	0	0.825641	0.867026	4.757	3.16092	5.50075	1.46666	0.919775	0.736871	2.65345	4.26906	3.84657	3.64327	4.92318	2.15121	3.82328	0.975412
mir-350-TCACAAAGCCCATACACTTTC	1.22089	2.07469	2.29265	2.4383	2.29868	1.05534	0.810747	0.988323	0.997985	1.46862	1.53379	2.76197	2.10201	1.02822	1.11598	2.02554	1.6583	0.8561	2.46526	2.17193	2.58057	2.70411	2.04007	0.801388	0	0	4.66469	1.79944	1.94156	3.43369	0.685664	0	0	0	0.684499	0	0	0	1.46666	0.495262	0.66318	2.43233	1.53686	2.56439	0	3.36848	2.15121	2.80372	2.10089
mir-26a-GTTCAAGTAATCCAGGATAGG	1.83132	2.66748	2.77532	2.54913	4.24373	2.04859	3.14163	3.50405	1.99598	1.60213	2.30069	3.12537	2.72816	3.50804	1.24727	1.71864	1.442	1.88343	3.58584	2.45522	2.89337	3.35075	3.46813	1.1353	1.45477	1.3447	0	1.79944	2.80449	3.43369	1.02849	1.03236	1.07182	1.23846	0	2.59473	1.64918	1.63536	1.3619	0.707521	1.32637	3.0957	2.56145	4.48766	4.50052	3.10937	2.15121	2.29397	0
mir-350-AAAGTGCATGCGCTTTGGGAC	1.70924	2.96386	2.41332	2.32747	3.71327	2.17275	0.912084	0.718782	2.70882	2.00267	1.99394	3.19807	2.28092	2.66126	1.96937	2.45521	3.38872	2.56831	3.02555	3.49398	3.98815	5.8785	5.10019	0	0	0	3.36894	0	1.5101	0	1.12645	0.980735	0	0	1.23209	1.15321	1.64919	0	1.3619	0.990525	0.589494	3.98018	2.04915	2.99179	2.14311	3.36848	2.15121	2.29397	1.4256
mir-345-TGACCCCTAGTCCAGTGCTTG	0	0	0	0	0	0	0	0	0	0	0	0	0	0	0	0	0	0.799031	0	1.41647	1.09479	0	1.12204	1.33564	1.65314	1.08856	2.59149	2.69915	2.58875	0	0.636689	0	0	0	0	1.87397	2.88607	1.78403	1.04762	0	0	0	0	0	0	3.36848	2.15121	3.82327	0
let-7f-AGGTAGTAGATTGTATAGTTG	0.854618	0	0.965322	0	2.21028	0	1.01343	1.07817	0.997985	1.60213	0	1.38098	0	1.33064	0	0	0.721	1.19855	1.79293	1.69978	1.56398	1.29326	0.918033	0	0	0	1.81404	0	2.80447	0	0	0	0	0.990771	0	0	0	0	0	0	0	1.76897	0	3.20549	0	2.85026	2.15121	3.05862	0.525222
mir-149-GAGGGAGGGACGGGGGCGGTG	2.80803	5.92772	4.58529	1.66247	1.67981	0.807022	0.810747	0	2.56625	2.80374	1.38041	2.39855	2.77288	1.87498	4.13569	9.75948	3.67711	1.71221	2.35322	3.21069	2.50237	4.23252	3.41712	0	0	0	9.07023	8.99716	5.60896	4.57823	0	0	0	0	0	0	0	0	0	0	0	0	0	0	0	3.36848	2.15121	3.31351	0
mir-196b-TCGACAGCACGACACTGCCTT	0	0	0	0	0	0	0	0	0	0	0	0	0	0	0	0	0	0	0	0	0	0	0	3.0052	2.11602	4.0341	0	0	0	0	0	0	0	0	0	5.76605	4.67268	5.50075	0	0	0	0	0	0	0	4.14582	2.15121	2.03907	0
mir-216a-TAATCTCAGCTGGCAACTGTG	1.70924	3.26024	18.4618	1.99497	2.21027	0.807022	0	0	3.13653	2.80374	3.83449	0	0	0	14.9016	70.5872	21.9184	1.48391	2.80144	2.92739	5.47393	28.5107	7.39527	0	0	0	0	0	0	0	0	0	0	0	0	0	0	0	0	0	1.40005	0	1.3661	0	0	0	2.15121	0	107.295
mir-27a-AGGGCTTAGCTGCTTGTGAGC	0	0	0	0	0	0	0	0	0	0	0	0	0	0	0	0	0	0	0	0	0.938388	0	0	2.73806	2.71116	2.3052	2.33235	2.24929	1.94156	5.15055	2.2529	2.01309	2.85818	1.89898	0.867032	2.45057	2.06147	2.3787	0	0.566017	0	4.2013	4.43982	5.55616	5.57206	0	2.15121	0	0
mir-382-AAGTTGTTCGTGGTGGATTCG	113.664	189.983	177.862	105.401	140.486	76.8533	47.3272	44.115	91.815	92.9238	100.924	117.674	123.617	101.915	203.896	349.131	227.332	96.9683	161.027	177.059	107.915	213.154	149.996	4.40762	4.0998	4.93056	0	2.69915	1.94157	0	2.39983	2.52927	2.14363	1.07334	1.82532	0.864909	0	0	0	0	0	0	0	0	0	3.36848	2.15121	2.03907	0
mir-382-AATCATTCACGGACAACACTT	90.4675	162.568	139.369	121.25	139.866	67.1691	44.7936	35.0405	74.849	83.1775	80.5243	103.138	108.858	91.3904	140.941	245.95	160.711	80.8731	151.277	158.362	97.9837	159.307	111.949	6.14395	3.63692	5.9551	3.10981	2.69915	1.94156	0	2.54675	3.09707	3.93	2.88976	2.50982	0	0	0	0	0	0	2.21121	0	2.56439	2.14311	3.88673	2.15121	4.33306	0
mir-423-GAGGGGCAGAGAGCGAGACTT	4.2731	4.00122	4.58529	7.42573	6.71923	5.27668	3.64834	2.15633	4.13451	5.20693	5.52167	8.2859	5.99299	6.35075	4.39826	7.18147	5.91222	4.85125	6.94756	7.74341	9.30568	10.0522	8.41531	11.7537	9.25762	10.5014	5.44215	6.74787	4.74604	6.29509	7.19951	9.49769	9.28908	10.4857	6.70804	10.9555	15.6672	10.8528	9.74279	5.37714	6.2634	9.50819	9.56272	10.6849	9.85827	4.66407	1.95565	0	5.62738
mir-324-GCATCCCCTAGGGCATTGGTG	21.4876	31.565	29.2011	37.2395	45.5315	21.2929	12.3638	12.6685	18.8191	20.4271	24.0806	42.6651	25.4478	31.028	22.9104	33.6363	20.5486	28.1943	52.7791	48.2546	22.8341	28.9222	25.7049	5.94361	5.75294	5.89107	4.14639	0	2.37303	3.43369	4.01604	4.59398	5.35909	3.79797	3.33122	10.3789	12.9186	9.06877	2.40951	1.69805	1.91586	8.84483	6.65975	10.0438	7.07222	4.92316	1.95565	3.05862	2.62611
mir-212-ACCTTGGCTCTAGACTGCTTA	300.704	402.047	344.018	612.123	453.018	240.617	27.3626	26.6846	467.343	443.658	485.906	290.006	206.579	232.014	259.039	344.159	181.404	342.499	471.314	529.478	258.526	171.241	165.246	10.4848	7.40607	9.98916	7.25619	5.3983	4.53031	10.3011	9.35444	9.54929	11.5518	12.7975	10.7238	5.0453	4.67268	4.60873	2.30475	1.41504	2.06324	3.53794	3.2445	3.20547	0	2.85026	1.95565	0	1.27554
mir-24-GGTGCCTACTGAGCTGATATC	5.24981	4.59398	5.42995	9.19905	9.90203	5.2146	3.34431	3.68375	7.69875	7.34311	10.7366	8.21321	8.13973	8.70961	3.47923	5.70835	3.82132	4.28051	7.95609	7.55453	5.86492	6.93663	6.52824	4.00693	5.88519	6.08317	6.47872	4.49857	5.1775	7.43966	2.69368	2.42603	3.21546	2.88976	2.55546	7.92832	6.18442	5.64942	2.09523	1.13203	1.03162	7.73924	7.51357	8.97534	6.4293	2.85026	1.95565	0	0.825349
mir-500-AATCCTTGCTATCTGGGTGCT	4.27311	7.70603	7.11927	8.64488	10.3441	4.3455	5.47252	4.58222	3.99195	4.13884	4.90816	9.1581	7.11108	6.10882	8.53398	13.0126	8.21941	5.53613	11.3178	11.0485	7.35071	12.2273	8.56828	4.54119	3.24017	4.16217	2.07319	0	1.5101	0	2.74266	2.52927	2.62	2.80719	1.91659	7.20757	7.00902	6.83877	1.99047	0.778271	1.76849	3.53794	5.46441	5.12876	4.5005	0	1.95565	2.03907	1.80076
mir-497a-TCCAAACCACACTGTGGTGTT	4.76145	1.92651	2.29265	4.87659	2.4755	1.55196	10.337	11.6802	4.27709	5.34045	7.5156	6.25076	5.99299	5.56447	1.44421	2.88487	2.73981	0.799031	2.68938	2.92739	4.06636	4.82037	3.06011	10.0841	8.1996	12.9987	7.77447	5.3983	5.60896	6.29509	12.1461	10.4784	12.8618	10.5683	10.1306	12.5412	15.3924	11.1502	1.88571	1.98105	2.87379	18.5741	12.1242	15.3863	21.8595	6.99608	1.95565	2.03907	3.0763
mir-103-GGCTTCTTTACAGTGCTGCCT	6.3486	11.1145	9.1706	9.75321	12.6428	5.27668	4.15506	4.22282	4.7048	6.40853	8.89602	11.702	9.43673	9.73783	6.76152	12.9512	8.43574	4.73711	10.8696	12.0873	6.64692	11.5806	6.88525	5.67648	5.09169	5.5709	1.81404	0	0	0	5.53429	5.05854	6.07363	8.00877	6.4799	6.19852	5.77213	8.17679	1.67618	1.13203	0.663185	5.74915	1.87839	3.84658	3.00034	4.14582	1.95565	2.03907	1.27554
mir-152-AGGTTCTGTGATACACTCCGA	0	0	0	0	0	0	0	0	0	0	0	0	0	0	0	0	0	0	0	0	0	0	0.867031	3.0052	0.859633	1.28066	4.66469	2.24929	1.72583	0	1.27338	1.65177	2.38182	1.65128	0.912661	4.4687	7.28388	3.27071	1.25714	0.91978	1.17899	5.52803	3.92754	3.84658	4.71481	0	1.95565	0	0.675285
let-7a-ATGAGGTAGTAGGTTGTATAG	2.31968	2.22289	3.01664	3.76829	3.2712	1.86236	2.53357	2.15634	2.13854	1.86915	1.53379	2.68928	1.61005	2.35886	1.77244	2.20969	1.1536	1.88343	3.36173	2.45523	2.03317	2.64533	2.09108	1.26886	1.19026	1.28066	2.59149	3.59886	1.72584	0	0	0.929116	0	1.23847	0.638864	2.88302	3.57323	2.08136	1.15238	1.34428	0.810557	4.64354	2.21993	4.06028	3.64327	2.33203	1.95565	0	0.975412
mir-151-TAGACTGAGGCTCCTTGAGGA	2.56386	1.92651	2.05131	5.20909	5.83512	3.60056	2.1282	1.52741	3.42167	3.87182	3.52773	4.57905	3.08594	2.72176	2.75712	3.19176	5.11912	2.7966	4.14613	5.76033	4.92654	9.28802	8.00729	3.47267	2.90954	3.13764	3.36894	2.69915	2.37302	3.43369	2.54675	2.37442	2.97727	1.98155	2.09913	5.18945	5.08497	3.86539	0.942854	1.41504	0.736871	7.07587	5.9767	6.19726	8.14379	2.33203	1.95565	0	0.975412
mir-134-TGTGACTGGTTGACCAGAGGG	33.9407	53.2013	54.2995	34.1363	34.9224	19.9272	18.5458	13.4771	27.3734	26.8357	25.9211	35.6149	31.0831	27.8828	61.1819	106.986	64.8902	23.5714	36.4186	42.3053	28.9337	51.4369	39.6284	4.47441	3.70305	5.12267	2.59149	0	2.37302	4.00596	1.4203	1.70338	1.54818	2.47693	1.87096	0	1.78661	0	0.733331	0	0	0	1.3661	0	3.85757	0	1.95565	2.03907	0
mir-378a-GCACTGGACTTGGAGTCAGAA	0	0	0	0	0	0	0	0	0	0	0	0	0	0	0	0	0	0	0	0	0	0	0	0	0	1.08857	0	0	0	0	0	0	0	0	0	0	1.23688	0	0.628569	0	0	0	0	0	0	4.92318	1.95565	0	0
mir-136-CATCGTCTCAAATGAGTCTTC	62.9977	94.6955	82.1733	110.499	113.078	58.5401	25.7412	22.9111	66.2949	79.1721	76.5364	79.7337	75.6727	66.8946	67.878	100.295	70.5859	64.8926	123.263	124.083	63.4977	91.9985	65.4864	1.8699	2.38053	3.0736	0	1.79944	0	0	1.91007	1.54853	2.26272	1.23846	1.18646	0	0	0	0	0	0	0	0	0	0	4.66407	1.95565	2.54884	0
mir-208b-TATAAGACGAACAAAAGGTTT	0	0	0	0	0	0	0	0	0	0	0	0	0	0	0	0	0	0	0	0	0	0	0	0	0	0	4.40554	1.79944	3.45167	8.01193	0	0	0	0	0	0	0	0	0	0	0	0	0	0	0	27.2071	1.95565	6.37211	0
mir-328-CCTGGCCCTCTCTGCCCTTCC	11.4763	20.006	18.5826	16.514	16.8865	11.2362	7.70204	6.01978	13.259	10.4139	15.4913	23.7675	19.2759	18.4474	19.4968	29.4625	20.0439	12.3279	17.481	20.4917	14.3104	21.3978	15.8106	0	0	0	1.5549	0	1.29437	2.8614	0	0	0	0	0	2.16228	1.78662	1.33802	0	0	0	2.21121	1.70763	2.56439	0	3.10937	1.95565	3.56839	0.600254
mir-363-ATTGCACGGTATCCATCTGTA	0	0	0	1.55165	0	0	0	0	0	0	0	0	0	0	0	0	0	0	0	0	0	0	0	0.734603	0	0	0	0	0	0	33.9404	31.2804	34.1791	5.53182	3.42248	10.0906	10.5823	8.47414	0	0	0	0	0	3.41919	0	3.10937	1.95565	2.80374	8.85374
mir-384-TCATTCCTAGAAATTGTTCAC	67.7591	145.674	124.647	97.9754	107.861	56.1811	49.6581	46.9003	58.5961	75.8343	69.6344	95.5058	100.405	95.0194	113.108	230.666	136.558	49.8823	109.256	106.991	90.8678	182.587	102.259	1.00173	1.19026	1.40873	0	0	0	0	1.02849	0.877502	0	0	0	0	0	0	0	0	0	0	0	0	0	0	1.95565	0	0
mir-431-TGTCTTGCAGGCCGTCATGCA	37.8475	62.0928	52.6102	119.033	119.708	60.3404	11.5531	8.71517	26.3754	34.1788	32.3631	42.8105	37.7022	29.6368	47.1994	62.8532	45.9279	104.558	157.778	147.597	66.5474	45.3232	51.7158	4.20728	3.70305	5.25073	2.0732	0	2.15728	2.86142	2.35085	1.54853	2.62	2.39437	1.32336	0	2.47377	0	0	0	0	0	0	0	0	3.10937	1.95565	0	0
mir-491-CTTATGCAAGATTCCCTTCTA	2.80803	3.85301	3.37864	5.31993	4.7742	2.54522	0	0.718782	2.70883	1.73565	2.45407	6.39614	4.83017	5.80641	2.95407	3.1304	2.01881	3.31026	5.37875	6.04362	3.12796	4.23251	3.00911	0	0	0	0	0	0	0	0	0	0	0	0	0	0	0	0	0	0	0	0	0	0	0	1.95565	0	0
mir-496a-AGTATTACATGGCCAATCTCC	44.4403	63.1302	54.1788	92.6554	117.675	60.5266	17.5324	16.0827	54.4616	59.813	55.0633	56.5476	54.3395	51.6529	47.4619	77.8301	52.2006	65.2921	109.032	108.219	53.019	67.6615	54.0109	1.80312	1.25639	1.21663	0	0	0	0	0.685664	0.67103	0.952727	0	0.638864	0	0	0	0	0	0	0	0	0	0	3.10937	1.95565	0	0
mir-504-AGACCCTGGTCTGCACTCTAT	1.83133	2.22289	1.93065	2.1058	1.85663	1.05534	0	0	1.56827	0	1.84055	5.81467	2.99649	3.62901	0.984686	1.59588	1.80251	1.0844	2.3532	2.36079	1.09479	1.70476	1.37705	0	0	0	4.40554	3.59886	3.02021	3.43369	0	0	0	0	0	0	0	0	0	0	0	0	0	0	0	3.6276	1.95565	0	0
mir-122-AAACGCCATTATCACACTAAA	0	0	1.80998	0	0	0	0	0	0	1.73565	0	0	0	0	0	0	0	0	0	0	0	0	0	0	0	0	0	2.24929	0	0	0	0	0	0	0	0	0	0	1011.78	772.185	1065.14	3.0957	0	0	0	0	1.76008	0	0
mir-32-CAATTTAGTGTGTGTGATATT	2.0755	2.51928	1.32732	1.99497	2.3871	2.42106	1.31746	1.07817	1.99597	2.26969	1.99394	3.34344	2.10202	1.99595	1.90373	3.3759	2.73981	0.970251	2.35322	1.41647	3.83175	5.17308	3.87614	4.8751	6.4142	7.17173	2.59149	1.79944	2.37302	2.8614	7.78719	8.0007	8.45546	6.10977	5.47597	10.2347	12.9185	9.81219	4.81903	4.03285	2.72642	9.95043	7.68433	10.6849	10.7155	3.36848	1.76008	3.56839	4.95209
mir-222-GCTACATCTGGCTACTGGGTC	57.992	81.6543	74.9334	49.9852	65.4241	36.1297	14.4921	14.0162	52.0379	57.1428	60.4316	146.675	103.938	105.785	48.8405	59.7229	48.6677	60.8975	110.265	107.369	49.9692	36.3291	37.8433	6.61143	7.53831	6.40333	3.88724	3.14901	4.09886	3.43369	2.15494	3.14868	3.8109	2.97232	1.50589	29.4068	30.7847	26.1658	4.6095	2.90082	2.94748	26.9768	19.4669	23.5069	23.5741	2.85026	1.76008	4.33304	2.32598
mir-335-CAAGAGCAATAACGAAAAATG	32.8418	67.576	54.5409	34.0253	50.9247	23.9623	6.89132	7.27766	37.4957	50.4672	51.2288	19.8425	24.8664	15.9676	41.2256	61.3802	43.6207	32.4749	66.4501	66.1968	28.1517	29.51	32.6412	2.87163	2.38053	4.09813	8.81109	12.596	10.355	10.8734	1.66519	1.39367	2.38181	0.990771	1.27772	2.45057	4.26038	3.41938	4.39998	2.19331	4.42122	7.07587	5.80593	4.27398	9.21531	3.6276	1.76008	0	1.6507
mir-106b-AAAGTGCTGACAGTGCAGATA	3.90683	3.70483	3.1373	9.7532	12.8196	6.64241	3.04029	3.50405	4.41966	4.40587	4.90815	8.72199	4.74072	5.32253	3.15099	4.41937	3.96551	5.30784	10.1972	8.21556	6.17772	6.46634	6.98725	6.54465	6.34808	8.26027	5.70128	5.3983	4.31459	7.43968	6.21995	8.31043	7.38363	7.84364	5.79541	6.63097	7.69616	8.47414	3.2476	3.18383	2.72642	9.06595	8.7089	12.3945	13.0729	4.40493	1.76008	4.84281	4.65197
mir-191-ACGGAATCCCAAAAGCAGCTG	3.29639	4.89037	3.1373	5.43077	7.24971	4.0351	2.33089	1.79694	3.42167	4.27236	3.83449	6.32344	3.44374	4.47577	4.00439	4.41937	3.10031	3.70978	7.28373	6.32692	4.92654	5.23185	4.23315	8.94883	7.40607	8.83657	4.14638	2.24929	3.02021	4.00596	7.83615	8.20723	8.33637	6.35745	5.2478	5.47775	7.28388	6.39276	3.03808	2.54707	2.43167	3.98018	3.41526	4.27396	4.92914	4.14584	1.76008	0	6.07757
mir-223-CGTGTATTTGACAAGCTGAGT	0	0	0	0	0	0	0	0	0	0	0	0	0	0	0	0	0	0	0	0	0	0	0	3.73981	2.44665	1.92099	4.66469	2.69915	3.02021	2.86142	3.86911	3.09707	4.04909	4.29335	2.87488	2.59473	2.19891	1.78403	2.30475	0.636767	0.810557	7.51812	6.65974	6.19726	5.57206	0	1.76008	2.80374	10.2043
mir-1968-TGCAGCTGTTAAGGATGGTGG	0	0	1.08599	0	0	0.744942	0	0	0	1.33511	0	0	0	0	0.722103	1.10484	1.0094	0	1.45674	0	1.09478	1.41084	1.07104	4.74153	4.09981	3.842	0	0	1.29438	0	3.37935	4.18103	4.16818	2.64205	1.82533	7.20758	11.1319	11.7449	1.46666	2.0518	1.47374	0	1.53687	0	2.78603	3.6276	1.76008	3.31351	0
mir-1843b-TCCGATCGTTCCCCTCCATAC	7.93575	9.92893	8.44662	11.3048	12.9964	9.43598	2.1282	2.78527	8.12646	8.14419	11.1967	10.6118	8.76586	7.37898	7.28668	7.73389	7.93104	7.02001	11.9902	14.8258	7.50712	11.2867	7.49727	0.734603	0.859633	0	3.10979	0	0	3.43369	0	0	0	0	0	2.01812	2.19892	2.97338	1.3619	1.20278	1.03162	0	0	2.99177	0	4.14584	1.76008	3.82328	0.675285
let-7e-CTATACGGCCTCCTAGCTTTC	13.796	22.8217	19.5478	20.0606	20.246	10.9879	15.3028	14.1959	17.536	20.0267	15.9516	25.8752	19.4102	21.1691	16.4114	23.2017	16.2226	14.7249	24.6526	25.6854	11.9644	25.8067	17.7996	4.00692	4.0998	4.35427	6.47875	6.74787	4.96177	4.00599	2.98754	2.06471	3.21545	3.30258	2.50982	9.08153	9.07049	8.47414	1.25714	1.06128	2.2843	10.8349	6.65976	8.54793	9.21533	3.88671	1.76008	2.29397	1.05044
mir-29c-CCGATTTCTCCTGGTGTTCAG	0.732532	1.63012	1.93065	2.65997	3.00598	1.92444	1.01343	0.718782	1.42569	1.06809	1.68717	1.96245	1.43116	1.99595	1.70679	3.19177	1.5141	1.48391	3.24967	2.36079	1.72038	2.82168	1.98907	0	0.727382	0	0	0	1.29437	0	0	0	0	0	0	2.01812	1.09945	2.08136	1.15238	0.707521	0	1.76897	0	0	0	0	1.76008	2.29397	0
let-7j-TGAGGTATTAGTTTGTGCTGT	0.732532	0	0	1.32998	1.67981	0.744942	0	0	0.997985	0	0	1.81708	1.07337	1.0887	0.787744	0	1.1536	1.02733	0	1.69978	0.860191	1.35205	0	0	0	0	3.10979	2.69915	3.23594	2.8614	0	0	0	0	0	0	0	0	0.628569	0	0	2.87457	2.73221	2.77807	6.4293	5.95963	1.76008	2.80374	0.975412
mir-3068-GTGAATTGCAGTACTCCAACA	1.58715	3.26024	3.74064	2.88164	3.2712	2.42107	0	0	1.71084	1.46862	2.30069	4.86978	2.90705	3.68949	2.2976	3.19176	2.59561	2.34002	4.59436	4.7216	2.73697	2.7629	2.8051	0	0	0.83243	0	0	1.5101	0	0	0	0	0	0	1.15321	1.64918	1.63536	0.628569	0	0	0	0	0	0	2.33203	1.76008	0	0
mir-136-CTCCATTTGTTTTGATGATGG	132.222	200.95	175.206	304.011	283.091	118.818	73.0685	68.3738	158.11	187.85	189.117	136.863	191.731	158.829	132.736	277.008	144.417	115.06	272.524	251.944	172.664	218.857	128.371	6.27752	4.8933	7.49189	2.33234	0	2.1573	0	3.91809	3.51	3.8109	3.05488	2.82925	1.00907	2.33634	0	0	0.778271	0	2.21121	1.87839	1.92329	2.14311	4.40493	1.76008	2.54884	0.525222
mir-154-AGGTTATCCGTGTTGCCTTCG	54.9398	82.5435	58.8848	105.512	108.745	56.926	27.9707	23.001	61.7327	64.0854	69.1741	64.1794	59.751	56.0076	61.3132	84.3978	59.9874	67.0043	116.764	120.589	57.1636	72.2467	57.275	2.13702	2.38053	3.39376	1.5549	2.24929	0	0	1.12645	1.13559	0.952727	0	0.821397	0	0	0	0	0	0	0	0	0	0	3.88671	1.76008	3.05862	0
mir-181a-CCACCGACCGTTGACTGTACC	0	0	0	0	0	0	0	0	0	0	0	0	0	0	0	0	0	0	0	0	0	0	0	0	0	0	0	0	0	2.8614	0	0	0	0	0	0	0	0	0	0	0	0	0	0	0	3.88671	1.76008	3.56839	0
mir-208a-ATAAGACGAGCAAAAAGCTTG	0	0	0	0	0	0	0	0	0	0	0	0	0	0	0	0	0	0	0	0	0	0	0	0	0	0	5310.5	3709.97	3923.68	4605.73	0	0	0	0	0	3.17133	2.88607	2.23003	0	0	0	74.7389	39.1046	69.4519	48.2196	5.18229	1.76008	2.03907	3.00127
mir-219a-AGAATTGTGGCTGGACATCTG	402.892	185.685	521.638	758.422	874.472	549.892	207.652	212.849	297.543	265.687	385.443	265.657	227.689	304.896	479.871	629.269	672.84	183.777	478.037	576.506	1217.4	1886.29	1498.38	0	0	0	0	0	2.1573	0	0	0	0	0	0	2.01812	0	0	0	0	0	0	0	0	2.35741	0	1.76008	0	0.525222
mir-3057-ATTGGAGCTGAGATTCTGCGG	3.05221	2.81566	3.13731	3.65746	2.29868	1.86236	1.21612	0	2.56625	1.73565	1.53379	2.68928	2.77288	3.68948	2.75712	3.62143	3.38871	1.19855	2.3532	3.21067	3.12796	4.7028	2.8561	0	0	0	1.5549	0	2.37302	0	0.685664	0	0	0.74308	0	1.58567	2.06147	1.63536	0	0	0	0	0	0	0	3.10937	1.76008	0	0
mir-3061-CTACCTTTGATAGTCCACTGC	0	1.03735	0.965322	0	0	0.993256	0	0	1.56826	1.60213	1.53379	0	1.11809	1.02822	0	0	0	0.913175	0	1.98307	1.01659	1.23449	0.969035	0	0	0	0	0	0	0	0	0	0	0	0	0	0	0	0	0	0	0	0	0	0	2.33203	1.76008	0	0
mir-369-GAATAATACATGGTTGATCTT	167.871	290.31	231.919	235.185	267	122.977	41.8547	33.7826	155.972	155.807	158.902	215.36	240.838	198.506	197.725	286.645	196.401	164.943	299.642	305.014	170.943	229.262	161.166	3.60624	3.30629	3.52183	1.81405	1.79944	1.94157	0	2.54676	2.27118	4.28727	1.89898	1.96222	0	1.23688	0.892013	0	0	0	0	1.53687	2.56439	0	5.95963	1.76008	3.05862	0
mir-455-CAGTCCACGGGCATATACACT	1.46506	2.0747	1.68932	2.88162	2.65232	1.11742	1.4188	2.96496	1.8534	1.33512	1.38041	2.61659	2.45981	1.63305	1.83808	1.8414	2.16301	1.25562	2.80143	2.36079	2.26777	3.11561	2.90711	10.2176	8.13344	10.5655	6.73788	7.64758	4.53031	6.29509	7.93414	8.10396	9.88452	7.76107	5.70414	19.028	17.4538	18.8809	20.1142	25.4707	11.5689	5.97025	5.80593	5.98356	8.14377	0	1.56452	0	1.27554
mir-335-TTTTTCATTATTGCTCCTGAC	63.9743	144.785	103.411	74.0358	95.5722	47.1176	7.8034	7.99638	70.9996	83.7114	82.2114	32.4894	54.3395	30.1812	84.8797	125.706	79.887	73.8528	142.313	140.609	57.7109	57.4329	53.8069	4.8751	3.10792	5.05864	13.7349	13.0459	11.2179	9.15652	4.55478	2.83897	3.81091	3.7154	2.92052	6.48682	7.8336	4.7574	8.17137	3.5376	6.92657	7.96034	10.9288	10.2575	13.0729	4.14582	1.56452	2.80372	1.35057
mir-547-CTTGGTACATCTTTGAGTGAG	2.0755	2.37109	3.25797	1.32999	0	0	3.34432	3.95328	2.99396	3.07075	2.30069	3.41612	1.96785	2.05644	1.70679	1.04346	1.0815	0	0	1.41647	1.09478	1.23449	0.867031	2.93841	2.90954	3.58586	24.3601	22.4929	20.2785	29.1862	0	0	0	0	0	1.87397	2.06147	1.33802	5.65712	4.52812	4.78965	1.99009	2.21991	2.99177	0	5.18229	1.56452	0	0.525222
mir-340-TATAAAGCAATGAGACTGATT	11.4764	15.1157	13.1526	14.5189	15.8256	6.26994	11.8572	10.6019	13.5441	15.7543	14.5711	12.6469	11.2257	11.7943	10.1095	18.1071	10.4546	6.39223	12.6625	15.298	12.199	21.2214	13.4135	5.67648	5.62069	5.63493	3.88724	2.24929	3.02021	0	3.6732	5.36824	5.47818	3.88053	4.33514	8.64909	6.45928	6.98744	4.92378	2.97158	3.31591	3.0957	3.24449	5.76986	4.5005	6.21874	1.56452	3.05862	5.32725
mir-30d-TTTCAGTCAGATGTTTGCTGC	2.44177	1.33374	2.17198	3.54662	4.15531	2.42107	4.35775	3.14465	3.13654	4.27236	3.83449	3.27075	2.23619	2.60079	1.83808	3.06901	1.65831	1.25562	4.14613	3.02181	2.65877	5.11429	3.57013	3.13876	3.17404	3.71394	6.2196	10.3467	7.55052	7.43966	1.56724	1.54853	3.09636	2.97232	2.96615	6.19851	7.97103	7.1361	3.14285	2.83007	2.94748	8.84483	5.80593	7.05205	10.5012	3.36848	1.56452	2.80374	1.57567
mir-144-GATATCATCATATACTGTAAG	0	0	0	0	0	0	0	0	0	0	0	0	0	0	0	0	0	0	0	0	0	0	0	0	0	0	12.9575	8.09743	16.3955	27.4695	0	0	0	0	0.684499	6.05436	6.047	9.66347	3.03808	7.78271	5.30546	7.73924	7.68433	13.8904	18.8593	2.85026	1.56452	3.31351	6.00254
mir-335-AAGAGCAATAACGAAAAATGT	22.2201	54.535	43.1983	27.4863	33.773	15.83	5.47252	4.31267	31.793	35.781	38.4983	12.5743	16.9056	9.97977	30.394	45.4827	30.2821	25.5119	46.0558	47.8769	19.3933	21.3977	21.2168	1.26886	1.32252	2.36923	7.25619	3.59886	5.8247	7.43966	1.42031	0.980735	1.78636	1.23847	1.18646	2.59472	4.81011	2.52737	1.88571	0.919775	3.53697	3.53794	4.95212	4.91508	7.71515	2.85026	1.56452	0	0.975412
mir-125a-ACAGGTGAGGTTCTTGGGAGC	10.1333	19.117	13.8765	14.5189	18.6547	10.1809	14.4921	11.5004	10.8353	10.4139	15.3379	17.1532	15.1614	15.5442	15.1642	22.2197	15.9341	11.7571	17.1448	18.9808	11.4953	18.1646	13.4645	5.54292	6.81096	5.5709	3.36896	4.49857	4.09886	3.43367	2.98753	3.30353	4.28727	3.22001	3.74191	10.6672	13.6057	11.2988	1.78095	1.27354	1.32637	10.1716	8.87966	9.83014	10.0726	2.33203	1.56452	4.07816	0
mir-30a-CTGTAAACATCCTCGACTGGA	0.854618	0	0	0	2.21027	0.931176	1.41881	0.988323	0	1.20159	1.22704	0	0	0	0	0	0	0	1.45674	0	0.860191	1.29326	0	0	0.727382	0	2.33234	0	3.45167	0	0	0	0	0.74308	0	3.45964	3.0235	3.86539	1.04762	0.495262	1.47374	3.75906	1.53686	1.92329	0	0	1.56452	0	0
mir-466d-TATACATACACGCACACATAG	7.69155	14.8193	11.3425	14.2973	9.81362	5.7733	6.48595	5.301	3.99196	4.00533	2.91421	15.9177	9.74976	9.61686	12.2757	14.3629	11.6081	8.04736	13.1107	13.9759	9.38388	13.3442	9.74137	6.47788	6.6787	5.50687	2.33235	3.14901	4.31459	0	5.48532	4.69721	4.52545	4.21079	4.06135	3.45964	4.53524	2.67604	1.04762	0.566017	1.1053	4.42242	3.41525	5.34248	4.71483	4.14582	1.56452	2.80374	7.87833
mir-338-CCAACAATATCCTGGTGCTGA	19.7784	15.8567	23.5298	29.4813	37.663	24.3969	15.3028	12.6685	13.4015	15.2203	21.7799	18.0255	15.3402	19.1128	23.3043	34.4956	31.1473	13.2411	28.4626	33.6177	49.891	72.8934	54.776	0.801388	0	0.960496	0	0	1.5101	0	0	0	0.952727	0	0.638864	0	0	0	0.942854	0	0	1.76897	2.39069	3.41919	0	0	1.56452	2.29397	0
mir-340-ATTATAAAGCAATGAGACTGA	4.27311	4.1494	5.30929	2.99246	4.24372	2.17275	3.95238	3.50404	3.84938	5.34045	5.06152	3.27074	3.71208	2.72176	3.28229	6.56768	3.89342	2.1688	5.2667	4.06057	4.37914	7.23055	4.13115	2.13703	2.3144	1.92099	0	0	1.72584	4.57826	0.881566	1.65177	1.31	1.48616	1.14083	2.45057	1.92404	1.63536	0.838092	1.06128	0.663185	2.65345	1.87839	1.70959	2.35741	0	1.56452	0	1.57567
mir-379-TATGTAACATGGTCCACTAAC	68.4916	91.7315	74.2094	127.789	141.28	72.9426	19.5592	15.9928	74.1362	84.6461	82.3649	83.4404	75.8963	69.2535	62.4291	90.6585	67.558	79.2752	148.365	144.291	70.3011	91.1167	69.5155	4.4744	3.63692	5.89106	3.88724	2.24929	2.58875	0	1.8611	1.23883	2.85818	1.1559	1.68842	1.15321	0	0	0.838092	0.495262	0	1.99009	1.3661	2.35069	0	2.85026	1.56452	2.80372	0
mir-29b-GCTGGTTTCACATGGTGGCTT	8.30205	12.8928	10.3773	13.7431	13.35	9.99467	4.86446	4.04313	10.6927	12.55	11.1967	13.1557	11.4493	9.67735	11.1598	17.3092	12.4734	7.93319	17.5931	18.0365	8.99294	18.87	10.0983	0.93495	1.45476	1.08856	0	2.24929	0	4.00596	0	0.67103	1.07182	0	0	1.58567	1.78661	3.12205	0.628569	0.495262	0	2.43233	0	0	2.14311	3.36848	1.56452	2.54884	0
mir-34b-TAGGCAGTGTAATTAGCTGAT	60.3118	20.747	82.294	28.1513	14.7647	7.75982	19.9646	8.35581	15.8252	20.2937	24.234	17.5167	28.2208	36.532	16.0832	52.0504	21.2696	7.41955	14.4555	16.7144	48.0143	53.0828	183.402	6.01039	3.17404	3.97007	5.96043	11.6963	8.19771	9.15649	4.16297	3.51	4.04909	3.96309	2.64673	16.2891	22.5387	15.3129	0.628569	1.13203	0.95793	844.681	628.066	754.143	768.515	4.92318	1.56452	4.07816	1.20051
mir-377-ATCACACAAAGGCAACTTTTG	32.8418	59.5735	35.717	108.615	104.148	51.0907	13.9853	9.5238	34.2167	37.5166	42.6395	43.1012	48.0781	45.7254	39.7157	56.0401	39.7273	61.1829	111.497	103.403	47.5451	37.8575	38.0473	2.6045	1.65314	3.32974	1.81405	1.79944	1.29438	0	1.32235	1.34206	3.09636	1.07334	0.958296	0	0	0	0.628569	0.495262	0	0	0	0	0	0	1.56452	0	0
let-7f-ACTATACAATCTATTGCCTTC	0	0	0	0	0	0	0	0	0	0	0	0	0	0	0	0	0	0	0	0	0	0	0	0	0	0	0	0	0	0	0	0	0	0	0	0	0	0	0	0	0	0	0	0	0	0	1.56452	0	0
mir-127-TGAAGCTCAGAGGGCTCTGAT	59.7013	98.1035	74.2094	116.706	119.708	62.6373	25.6397	24.2588	65.4394	63.4178	71.6282	67.6682	76.1646	68.9511	72.8668	127.425	77.2197	73.7961	139.399	134.471	64.2797	83.2394	63.8543	2.73806	2.0499	3.32973	1.5549	1.79944	1.5101	4.00599	1.66519	1.29045	2.50091	2.06411	1.55153	0	1.78661	0	0	0	0	0	0	0	0	5.18229	1.56452	2.29397	0
mir-143-GATGAAGCACTGTAGCTCAGG	0	0	0	0	0	0	0	0	0	0	0	0	0	0	0	0	0	0	0	0	0	0	0	3.27233	3.63692	5.82703	0	0	0	0	2.79164	3.87133	4.64454	2.22924	2.23602	0	0	0	0	0	0	0	1.87839	0	0	0	1.56452	0	0
mir-196a-CGGCAACAAGAAACTGCCTGA	0	0	0	0	0	0	0	0	0	0	0	0	0	0	0	0	0	0	0	0	0	0	0	0	0	0	0	0	0	0	0	0	0	0	0	1.00907	0	1.48669	0	0	0	0	0	0	0	2.33203	1.56452	0	0
mir-1a-ATACTTCTTTATATGCCCATA	0	0	0	0	0	0	0	0	0	0	0	0	0	0	0	0	0	0	0	0	0	0	0	0	0	0	0	0	0	0	0	0	0	0	0	0	0	0	0	0	0	0	0	0	0	2.33203	1.56452	2.29397	0
mir-3535-TTCCTCTAGATAGTCAAGTTC	0	0	1.08599	0	0	0	0.912084	0	0	0	0	0	0	0	0	1.10484	1.44201	0.799031	0	1.69978	0	0	0.918033	0	0.727382	1.34469	0	0	0	4.57826	0	0.774263	0	0.908209	0	1.29737	1.78662	0	0	0.495262	0	0	0	0	0	0	1.56452	0	0.750317
mir-483-CACTCCTCCCCTCCCGTCTTG	0	0	0	0	0	0	0.912084	0	0	0	0	0	1.07337	1.02822	0	0	0	0	0	0	0	0	2.04007	0	0	0	0	0	0	0	0	0	0	0	0	4.757	5.49727	0	0	0	0	0	0	0	0	3.6276	1.56452	2.29395	0
mir-488-TTGAAAGGCTGTTTCTTGGTC	112.932	186.279	161.812	155.829	160.201	59.7196	26.8559	24.4385	112.63	129.105	137.735	156.269	173.796	165.18	85.4055	147.558	79.9589	80.2458	177.723	171.677	106.898	107.694	77.1148	6.54465	6.01745	7.94013	4.14639	3.59886	5.8247	6.29509	4.40784	4.23265	7.14544	5.03643	3.23995	1.29736	1.23688	0	0	0	0	0	0	0	0	0	1.56452	0	0
mir-495-AACAAACATGGTGCACTTCTT	110.124	163.901	144.436	227.095	256.922	128.192	37.3955	35.31	113.913	133.912	121.477	131.702	135.29	118.729	112.058	170.759	120.696	155.697	272.076	284.24	123.711	142.965	121.996	3.13877	2.51278	3.842	1.81405	0	1.29437	3.43369	2.00802	1.90986	2.38181	2.3118	1.68842	0	1.78662	0	0	0	0	0	0	1.70959	2.35741	4.92318	1.56452	4.07816	0
mir-5121-GCTTGTGATGAGACATCTCCC	0	0	0	0	0	0	0	0	0	0	0	0	0	0	0	0	0	0	0	0	0	0	0	0	0	0	0	0	0	0	0	0	0	0	0.867026	0.864909	1.51174	0	0	0.707521	0	4.2013	2.56143	5.34246	4.28621	0	1.56452	0	5.85247
mir-582-ATACAGTTGTTCAACCAGTTA	33.6964	67.1315	46.8182	31.6979	40.7574	21.8517	68.1025	55.8851	62.7307	62.3498	72.8552	84.7488	58.3645	72.8824	53.8296	103.302	57.0313	22.7724	52.6671	57.509	31.3578	75.7738	41.5664	21.1699	17.9201	17.7372	6.73788	7.19774	6.47187	4.00596	19.7373	17.7049	24.5326	18.4118	15.1502	11.9646	17.8661	28.9903	0	0	0.810557	35.8215	32.1034	38.0384	40.5046	2.33203	1.56452	0	1.05044
mir-666-GGCTGCAGCGTGATCGCCTGC	90.1012	173.237	146.609	176.777	163.207	72.2596	29.7949	25.2471	68.4333	59.1455	70.8613	111.278	133.366	115.16	142.648	235.946	162.082	107.812	194.195	184.897	112.294	154.252	112.306	3.13877	3.43855	3.0736	0	0	0	0	1.76314	1.13559	1.54819	1.81641	0.867026	0	0	0	0	0	0	0	0	0	0	0	1.56452	0	0
mir-6945-TCTGAGCTCTGCCCTTCCCAT	0.976705	2.66747	3.25797	1.88414	2.3871	1.4278	0	0	2.8514	1.46862	2.91421	3.19806	2.14674	1.69354	2.23196	3.37591	2.52351	1.54099	3.58583	2.45522	1.79858	2.46897	1.37705	0	0	0	0	0	0	0	0	0	0	0	0	0	0	0	0	0	0	0	0	0	0	3.88671	1.56452	2.80374	0
mir-7075-CAACCATGTCTTCTTTCCCAG	2.93013	2.81566	2.41331	1.88414	2.21027	1.67612	1.92552	1.7071	2.42369	2.00267	2.60745	3.63417	1.83367	2.66127	1.57549	2.94625	1.6583	1.99757	2.46526	3.39954	1.79858	2.3514	2.14208	0	0	0	0	0	1.72584	0	0	0	0	0	0	1.00907	2.33634	0	0	0	0	0	1.3661	0	0	0	1.56452	0	0
mir-7689-TTAGAGCCAGACTGCCTGGGT	10.7438	32.3061	13.7559	18.509	23.5173	11.2363	6.08058	3.14466	17.9638	21.8958	28.3752	35.0334	38.9097	41.0077	17.2649	18.7823	11.6082	14.7821	23.0838	28.1406	14.3104	166.596	32.8962	0	0	0	0	0	0	0	0	0	0	0	0	0	0	0	0	0	0	0	0	0	0	0	1.56452	0	0
mir-3535-TTACCTGAGAAATAATTGATG	4.63936	6.07591	4.82662	12.3023	9.6368	7.26317	3.95237	3.05481	4.7048	4.53937	3.98787	8.72199	5.90356	6.22979	4.07003	7.12009	3.89342	5.30784	8.29225	9.25431	5.31754	6.17242	6.06922	5.07545	4.23205	4.03409	5.44213	4.94845	4.96177	6.29509	4.99556	5.57471	4.04909	5.61438	5.11091	17.0098	17.4538	12.4882	6.91425	8.13646	10.9794	10.1716	7.85509	11.7534	11.1441	4.14584	1.36896	3.56839	11.4799
mir-16-TCCAGTATTGACTGTGCTGCT	0	0	0	1.99497	2.03345	1.05534	0	0.988323	1.28313	0	0	0	0	1.51208	0	1.41174	1.58621	0	0	0	2.11138	2.82168	1.98907	1.73634	1.71927	2.17713	2.59149	3.149	2.1573	3.43369	2.84061	2.89059	2.85818	2.88975	2.60108	3.74793	4.67268	6.98744	6.39044	3.60835	3.75804	2.43233	2.21991	4.91508	5.35775	3.10937	1.36896	2.03907	2.62611
mir-222-GCAGCTACATCTGGCTACTGG	26.2491	33.3434	31.3731	32.2521	34.3919	19.5547	5.57387	5.39085	24.0942	22.1629	25.9212	54.8759	38.7755	41.0077	20.4159	24.9817	21.9906	29.7924	52.667	55.9037	24.6327	18.2233	19.6867	3.7398	2.90954	3.39377	2.59149	4.04872	3.23594	0	0.73464	2.11632	1.54818	1.1559	0.958296	16.145	17.0415	16.5022	5.97138	3.96211	4.12647	11.4983	7.68433	13.6767	11.3584	0	1.36896	0	1.4256
mir-183-ATGGCACTGGTAGAATTCACT	1.46506	0	17.6172	1.44082	1.41457	1.48988	3.64835	1.07817	1.14055	0	0	0	0	1.02822	0	0	1.2978	0.970251	0	1.60534	0.860191	1.64597	0	199.678	184.557	198.375	0	2.24929	0	0	166.665	150.775	178.279	111.297	84.1019	43.5338	49.7502	29.1391	5.1333	2.97158	7.8845	57.4913	50.0335	77.3588	61.507	19.6927	1.36896	8.66608	2.10089
mir-671-TCCGGTTCTCAGGGCTCCACC	9.52292	9.03977	10.1359	12.1915	12.3775	6.33202	3.24298	3.68374	9.97985	9.07875	11.6568	14.246	10.5548	10.2217	7.08972	9.82083	6.20062	7.47667	13.2228	12.3706	9.14927	10.8164	7.03826	2.00346	2.64503	3.39377	0	1.79944	2.58875	0	1.17543	2.01309	1.54819	1.07334	2.00786	3.74793	5.77213	5.35208	3.66665	2.90083	2.65273	2.87457	2.56145	4.06028	2.14311	0	1.36896	4.33302	1.57567
mir-146a-CTGAGAACTGAATTCCATGGG	1.0988	1.18554	1.56865	2.1058	1.85663	1.55196	0	0	0.997985	2.80374	1.84056	1.38098	1.43116	1.02822	1.37856	1.90279	1.73041	1.14147	2.24115	1.7942	2.26777	2.29262	1.98907	7.0789	3.90143	4.41829	3.36894	3.149	3.88311	4.57826	6.61176	14.3497	10.7182	5.36669	8.16835	5.91021	7.28388	7.43344	2.93332	2.75933	2.57904	17.4685	21.8576	17.0959	20.788	2.59115	1.36896	2.54884	22.2844
mir-320-AAGCTGGGTTGAGAGGGCGAA	2.68594	2.51928	3.8613	4.76575	7.07287	5.33876	5.37118	4.13298	1.42569	3.20427	2.91421	4.14295	2.50454	2.9032	2.95406	4.17384	3.53292	5.25077	7.95608	7.46011	6.49053	7.81841	6.98725	2.87163	3.5708	3.32974	4.14639	4.04872	6.90333	4.00596	0.930542	1.96148	2.02454	1.89898	1.04956	8.36078	9.6202	7.28477	2.93332	1.98105	0.95793	7.51812	5.63517	7.69315	7.28655	4.92318	1.36896	3.31349	0.525222
mir-505-CGTCAACACTTGCTGGTTTTC	3.78474	6.81687	8.08461	8.53405	10.0789	4.0351	2.12821	2.06649	4.41966	5.47395	4.75477	6.90491	4.69601	4.05237	6.10506	10.496	6.92163	5.76444	9.97311	13.126	7.89811	10.2286	7.65028	1.00173	0	0.896463	1.5549	2.69915	1.94156	0	1.56723	0.980735	1.78636	1.23847	1.68842	1.44152	1.92404	1.78403	2.93332	1.55654	1.54742	3.31682	3.75677	4.06028	5.14343	3.6276	1.36896	0	1.20051
mir-185-AGGGGCTGGCTTTCCTCTGGT	9.52292	12.1518	15.9278	6.31741	8.13382	4.90421	2.93894	4.31268	10.1224	8.01067	10.2765	15.1907	9.88392	12.0967	15.755	25.9023	15.3574	3.82393	9.52488	12.6539	9.93132	18.7524	11.1695	2.07025	2.44665	2.24117	3.88724	4.49859	4.96177	6.86739	2.20393	2.06471	2.26272	2.3118	1.32336	6.63097	4.94754	4.7574	2.61903	1.20278	0.95793	3.53794	3.07374	4.27396	2.78603	2.85026	1.36896	0	1.6507
mir-345-CCTGAACTAGGGGTCTGGAGA	1.83133	2.96386	1.80998	1.7733	1.76823	1.55196	1.01343	0.808629	0	1.33511	1.68717	2.6166	2.45981	1.75401	1.31292	2.82349	2.3793	1.42684	0	2.92739	1.87678	3.29196	2.39709	1.80312	2.97566	3.77796	2.0732	4.49859	2.37302	5.7228	0.979517	1.4453	2.14363	1.1559	1.04956	2.59472	3.57323	1.18935	2.30475	0.919775	1.54743	2.87457	1.87839	2.99177	2.35741	2.59115	1.36896	0	0
mir-186-CCTAAGGTGAATTTTTTGGGA	2.68596	3.11205	3.49931	4.76577	5.30466	3.04185	3.64835	3.77359	2.70882	3.47129	3.06759	5.45124	3.7568	3.50804	2.69148	4.29662	2.88401	3.0249	5.04259	7.08239	4.37914	6.52513	4.13115	2.47093	1.98377	1.85697	4.92385	4.04872	3.45167	4.00596	1.66519	1.54853	2.26272	1.32103	1.55153	1.87397	3.29835	2.97338	2.19999	1.62729	0.884244	4.64354	3.92754	4.48768	2.35741	4.66407	1.36896	2.80374	2.47605
mir-1839-AGACCTACTTATCTACCAACA	9.27871	18.5242	13.8765	14.2973	16.0908	7.44942	4.4591	3.77359	8.26903	8.67822	9.50953	19.6972	14.6247	14.8789	14.1795	18.7823	12.4013	10.844	18.2653	18.0365	10.4787	17.6943	11.3734	4.60796	3.17404	3.97007	2.59149	0	1.29438	0	2.05699	2.83897	2.14363	2.14667	2.64672	6.77511	8.52077	7.28477	1.99047	2.47632	2.43167	5.30691	6.31822	5.55616	6.85791	2.85026	1.36896	2.80374	2.40102
mir-30c-TGGGAGAGGGTTGTTTACTCC	1.95342	1.92651	1.44799	2.4383	2.38709	0.993256	1.62149	1.7071	1.71084	3.07075	1.38041	2.03513	2.45981	1.63305	1.44421	2.7621	2.16301	1.31269	1.90498	2.83295	1.72038	4.76158	2.6521	0	1.12414	0.896463	13.7349	8.5473	8.8449	10.8733	0.881573	0.67103	1.07182	0.990771	0.912661	7.49588	10.4448	5.79808	1.36189	0.849025	0.95793	0	0	0	0	2.33203	1.36896	0	0
mir-744-GCGGGGCTAGGGCTAACAGCA	4.2731	4.14941	5.18863	5.2091	5.21626	5.15253	2.73626	2.15634	4.13452	4.67289	7.05546	11.7747	7.91611	8.16526	7.41799	9.63669	6.92163	3.48149	7.17168	5.94921	4.22276	4.52645	5.6102	1.1353	1.98377	0	1.5549	2.2493	0	0	1.02849	1.18721	1.78636	0.74308	0.867032	1.72982	3.0235	2.08136	1.04762	0.636767	0.663185	2.43233	3.07373	2.13699	2.57172	0	1.36896	0	0.750317
mir-1968-TCTGCAGCTGTTAAGGATGGT	0	0	0.965322	0	0	0.744942	0	0	0	0	0	0	0	0	0.722103	0	0	0	0	0	0	0	0	2.27059	1.98377	1.79293	0	0	0	0	1.37133	1.755	1.78636	1.32103	0.867026	4.03623	4.39781	4.90607	0.942854	1.34429	0	0	0	0	0	2.33203	1.36896	0	0
mir-3068-TGAATTGCAGTACTCCAACAT	0.976705	0	1.20666	1.7733	2.03345	0.807022	0	0	0	0	0	0	1.02865	0	0	0	0	0.741955	1.79291	1.7942	1.40758	1.11692	0	0	0	0	0	1.79944	1.5101	8.01193	0	0.774263	3.33454	0	0	3.31548	4.12295	3.41938	0.942854	0	0.589494	0	0	0	0	0	1.36896	3.82327	0.750317
mir-383-CAGATCAGAAGGTGACTGTGG	269.205	282.901	247.123	614.674	661.049	374.644	15.1001	17.3405	251.493	214.552	262.125	109.17	74.5547	60.6648	302.627	481.037	342.692	530.727	762.216	758.193	399.989	307.445	357.472	0.801388	1.38864	1.21664	0	0	0	0	0	0.67103	1.07182	0	0.638864	7.49587	9.07049	6.39276	0.942854	0	0	0	0	0	0	0	1.36896	2.03907	2.47605
mir-872-AGGTTACTTGTTAGTTCAGGA	2.0755	2.22289	3.01664	3.98994	3.53644	2.35899	1.82418	1.5274	1.71084	2.4032	2.14732	3.34344	2.95177	3.02417	1.90373	1.78003	2.73981	2.28294	4.14613	5.09931	3.51896	4.35009	3.57013	0.868165	1.12413	1.1526	0	0	0	0	0.979517	1.08397	1.07182	1.1559	0.821397	2.59472	3.4358	2.67604	0.838092	0.707521	0.95793	1.99009	3.24449	3.63287	3.42896	2.59115	1.36896	0	0
mir-297c-ATGTATGTGTGCATGTACATG	6.71487	16.4494	9.53259	9.53154	6.01194	2.35899	3.64834	1.7071	2.28111	2.00267	2.76083	9.1581	7.64777	9.19348	7.48358	13.9333	5.91222	3.59563	6.27522	6.04362	7.42892	7.4657	4.94718	5.07544	5.81907	4.54637	2.85064	5.3983	2.80447	4.57823	3.77116	3.35516	3.69181	3.05488	3.92444	2.30642	2.19891	2.08136	0.733331	0.495262	0.589494	3.31682	3.07373	4.06027	4.5005	3.88671	1.36896	3.82328	11.5549
mir-378d-ACTGGCCTTGGAGTCAGAAGG	0	0	0	0	0	0	0	0	0	0	0	0	0	0	0	0	0	0	0	0	0	0	0	1.80312	1.98377	3.00956	0	1.79944	2.1573	0	1.2244	0.980735	0	2.31181	1.73406	1.00907	2.88606	1.93269	0.733331	0.636767	0.589494	0	0	0	0	0	1.36896	0	0
mir-1193-TAGGTCACCCGTTTTACTATC	6.71487	9.63258	10.4979	16.6247	16.3561	7.20113	2.53358	2.51573	8.98185	7.61013	7.5156	11.9927	10.7785	8.89106	8.79653	8.9615	6.63322	11.1864	17.5931	16.9978	7.50712	7.23055	7.34427	2.47094	1.52089	1.72889	0	0	1.72584	0	0.783615	0.774263	1.78636	0.825641	0.912661	0	0	0	0	0.495262	0	0	0	0	0	3.36848	1.36896	0	0
mir-143-TCTGAGATGAAGCACTGTAGC	0	0	0	0	0	0	0	0	0	0	0	0	0	0	0	0	0	0	0	0	0	0	0	6.67822	6.01744	10.1813	1.5549	0	0	2.8614	4.65272	4.49074	5.83544	4.45848	3.28558	1.72982	0	0.892013	0	0	0	1.99009	1.53686	1.70959	2.14311	0	1.36896	2.03907	0
mir-151-CCTCGAGGAGCTCACAGTCTA	0.976712	0	0	0	1.94505	0.869103	0	0	0.997985	0	1.22704	0	1.11809	1.14918	0.919039	0	0.721	0	0	1.60534	1.64218	2.7041	1.32605	0	0	0	0	0	0	0	0	0	0	0	0	0.864909	0	0	0	0	0	0	0	0	0	0	1.36896	0	0.600254
mir-1964-AGCTGGAGCACAAAAGCCGGT	0	0	0	0	0	0	0	0	0	0	0	0	0	0	0	0	0	0	0	0	0	0	0	0	0.793511	0.960496	0	0	1.72583	0	0.685664	1.03236	0.952727	0.825641	0.638864	1.29737	1.37431	1.18935	0	0.495262	0	0	0	0	0	0	1.36896	0	0
mir-1983-CTCACCTGGAGCATGTTTTCT	17.2145	14.2266	15.2039	44.4436	36.4253	16.7612	4.56044	2.96496	25.8051	19.7597	19.019	42.4471	23.7931	26.6731	11.6193	10.0663	11.4639	28.5368	30.9279	34.2787	26.5096	26.6883	18.7687	3.94015	1.65314	1.40874	10.8843	6.29801	14.2381	15.4516	4.79966	3.14868	5.00182	4.37592	6.20613	1.44152	1.09945	1.48669	0	0.566017	0	0	0	0	2.14311	0	1.36896	0	0.750317
mir-199b-CAGTGTTTAGACTACCTGTTC	0	0	0	0	0	0	0	0	0	0	0	0	0	0	0	0	0	0	0	0	0	0	0	1.60277	1.19026	1.21663	0	2.2493	0	4.00596	1.07747	0.67103	1.07182	1.07333	0.730134	1.00906	0	1.33802	0	0	0	3.53794	4.26906	2.35069	4.92912	2.33203	1.36896	0	0
mir-23a-GGGGTTCCTGGGGATGGGATT	0	1.18554	0.844662	0	0	1.05534	0	0	1.42569	1.46862	1.84055	1.52635	0	0	0	0	0.793104	0	0	0	0	1.35205	0.969035	5.07545	5.95132	5.9551	4.14639	5.3983	5.60896	5.15053	2.10597	3.92294	3.57272	2.97232	1.82533	2.45057	3.98552	2.82471	0	0	0	19.2376	14.3441	14.7452	16.9305	3.88671	1.36896	4.33304	1.12548
mir-3098-TCCTAACAGCAGGAGTAGGAG	0	0	0	0	0	0	0	0	0	0	0	0	0	0	0	0	0	0	0	0	0	0	0	0	0	0	0	0	2.1573	0	0	0	0	0	0	0	0	0	0	0	0	0	0	0	0	0	1.36896	0	0
mir-3535-GAAAATTCCTCTAGATAGTCA	0	0	1.08599	1.66247	0	0	0	0	0	0	0	1.67171	0	0	0.656455	0	1.00941	0	0	0	0	0	0	1.33564	0.925762	0.896463	0	0	0	3.43369	0	1.08397	0	0	0.867026	1.44152	1.78662	1.63536	0	0	0.810557	2.65345	2.04915	0	2.14311	0	1.36896	2.29397	2.85121
mir-384-ATTCCTAGAAATTGTTCACAA	225.009	476.737	418.468	323.076	367.966	194.679	198.531	166.398	215.993	251.935	259.212	367.705	370.625	344.392	376.282	674.936	432.674	157.98	363.851	371.778	283.784	535.59	318.557	2.73806	3.96755	4.4183	0	0	0	0	2.4488	2.63251	3.93	4.04566	2.78362	1.15321	0	0	0	0	0	0	0	0	0	2.85026	1.36896	3.31351	0
mir-434-GTTTGAACCATCACTCGACTC	52.2539	82.0989	69.2621	96.4237	100.081	51.7736	20.4713	20.1258	55.7447	55.1401	63.9593	55.8935	61.3164	54.0722	67.1558	109.502	67.7022	56.3887	105.67	103.686	54.1138	80.2415	59.3661	1.26886	2.38053	2.62537	0	0	0	0	0.783615	1.34206	1.31	1.23846	0	0	0	0	0	0	0	0	0	0	0	5.70052	1.36896	0	0
mir-434-TTGAACCATCACTCGACTCCT	58.2362	93.9543	79.76	95.8695	106.8	55.0016	24.8291	21.7431	72.2828	72.8971	71.0147	65.3422	70.0374	64.5963	82.1885	123.988	88.8997	66.2053	121.582	114.357	58.9621	99.2877	68.2404	0	0.793511	1.1526	0	0	0	0	0	0	0	0	0	0	0	0	0	0	0	0	0	0	0	0	1.36896	2.29397	0
mir-543-AAACATTCGCGGTGCACTTCT	120.867	209.248	182.084	261.119	275.134	142.657	61.9205	58.4008	114.911	108.812	106.599	142.605	151.211	126.955	189.191	301.99	193.589	195.591	317.908	313.702	157.728	187.113	168.816	3.60623	3.43855	3.90603	3.10981	4.49859	2.1573	0	1.81211	1.80662	0.952727	2.22924	2.00786	0	1.09946	1.04068	0	0	0	1.99009	2.21991	2.35069	3.00034	8.03253	1.36896	4.58793	0.750317
mir-615-CCGAGCCTGGGTCTCCCTCTT	0	0	0	0	0	0	0	0	0	0	0	0	0	0	0	0	0	0	0	0	0	0	0	0	0	0	0	0	0	0	0	0	0.952727	0	0	3.17133	4.81012	3.27071	0	0	0	0	0	0	0	2.59115	1.36896	2.03907	0
mir-675-CTGTATGCCCTAACCGCTCAG	0	0	0	0	0	0	0	0	0	0	0	0	0	0	0	0	0	0	0	0	0	0	0	0	0	0	2.07319	0	0	0	0	0	0	0	0	0	0	0	0	0	0	0	0	0	0	4.92318	1.36896	0	0
mir-8103-TCTCCTGTTCTCTGTTCTCCC	1.34298	1.77832	1.44799	1.32998	2.3871	1.80028	0	1.16802	1.14056	0	1.07366	1.59903	0	1.63305	1.05033	2.27106	2.16301	0.8561	1.56881	2.45522	3.90996	5.5258	4.02915	0	0.727382	0	0	0	0	0	0.783615	1.08397	1.19091	0	0	0	0	0	0	0	0	0	0	0	0	0	1.36896	0	0
mir-669b-AGTTTTGTGTGCATGTGCATG	3.25569	8.05181	7.23994	4.61799	5.00996	1.92444	4.49287	3.05481	1.75836	1.86916	2.35182	5.69352	3.59281	3.14513	6.49896	11.5394	5.96029	2.75855	4.66906	4.65864	4.7962	7.03461	5.5422	5.25352	5.48843	5.78433	3.88724	2.69915	2.58875	2.8614	3.46097	3.52721	3.01696	3.13745	2.63151	2.54667	2.19891	1.88314	0	0.5896	0.564932	4.64354	3.30141	3.91781	3.57184	2.85026	1.23858	2.80374	10.5044
mir-122-GAGTGTGACAATGGTGTTTGT	0	0	0	0	0	0	0	0	0	0	0	0	0	0	0	0	0	0	0	0	0	0	0	0	0	0	0	2.24929	0	0	0	0	0	0	0	0	0	0	255.722	173.837	224.009	0	0	0	0	0	0	0	0
mir-194-GTAACAGCAACTCCATGTGGA	1.22088	2.0006	1.99099	1.66247	3.18278	1.67612	7.29668	5.92993	1.63955	1.93591	1.38041	2.94367	2.30328	3.50805	1.34574	2.11761	1.47806	1.3127	3.80996	2.36079	1.72038	1.96929	2.95811	374.046	415.403	447.593	1.5549	9.44702	4.96176	2.8614	893.224	604.546	694.419	1841.02	1616.41	121.953	131.11	131.721	197.37	151.834	158.279	10.1716	2.56145	2.35067	3.96473	0	0	9.94052	0.937897
mir-192-CTGCCAATTCCATAGGTCACA	1.70924	0	0	0	1.32617	0	1.21611	1.25786	0	1.2016	1.38041	1.7444	0	0	0	0	0	0	0	0	1.25119	1.70476	0	231.6	267.876	285.269	2.59149	3.14901	3.6674	0	230.04	210.652	237.943	234.153	165.465	94.4196	105.273	99.4593	194.542	130.395	129.173	3.31682	1.3661	1.70959	2.57172	3.36848	0	2.03907	0.525222
mir-802-CAGTAACAAAGATTCATCCTT	0	0	0	0	0	0	0	0	0	0	0	0	0	0	0	0	0	0	0	0	0	0	0	0	0	0	0	0	0	0	78.6067	56.7795	52.7572	124.673	120.7	23.6409	24.188	6.6901	130.532	31.2723	44.5806	0	0	0	0	0	0	0	8.02839
mir-192-GACCTATGAATTGACAGCCAG	0	0	0	0	0	0	0	0	0	0	0	0	0	0	0	0	0	0	0	0	0	0	0	57.9001	72.0773	71.7173	0	1.79944	0	0	85.7079	76.0332	88.6037	95.6099	86.7944	28.542	37.2441	37.6132	53.9521	48.4649	51.1387	0	0	0	0	0	0	0	0
mir-802-ACGGAGAGTCTTTGTCACTCA	0	0	0	0	0	0	0	0	0	0	0	0	0	0	0	0	0	0	0	0	0	0	0	0	0	0	0	0	0	0	29.7775	25.0346	24.4136	45.6582	39.8833	8.50492	7.83361	1.63536	53.114	13.7259	19.085	0	0	0	0	0	0	0	1.87579
mir-31-TGCTATGCCAACATATTGCCA	27.3478	30.6759	34.993	37.6829	39.0777	18.2511	1.52014	1.25786	29.2268	29.9065	29.7556	14.9001	18.7393	17.7821	14.9672	14.6085	11.3197	17.6927	32.7208	35.412	16.4218	67.3088	18.7686	1.26887	1.25638	1.72889	24.1009	22.0431	12.9437	21.1744	132.285	117.534	126.95	190.807	142.147	19.6046	22.8136	12.0421	46.095	34.3146	57.6968	23.881	24.419	25.0027	26.3601	2.59115	0	2.29397	0.525222
mir-194-CCAGTGGGGCTGCTGTTATCT	0	0	0	0	1.76823	0	2.22955	1.61726	0	0	0	0	0	0	0	0.982083	0	0	0	0	0	0	0	54.0935	62.0261	50.2661	1.81404	2.24929	1.29438	0	60.2406	56.8311	53.4718	70.0144	43.8078	26.0914	25.8372	22.3003	40.5426	29.1497	27.8536	1.76897	0	0	0	0	0	0	0.825349
mir-31-GGCAAGATGCTGGCATAGCTG	9.88915	13.041	15.3246	16.514	19.362	7.88397	0.810747	0.718782	8.69676	10.8144	12.7305	6.54151	6.79801	5.62496	5.77684	5.27869	3.74922	9.36008	14.0072	16.2422	8.21088	26.6884	8.41531	0	0	0	6.73788	9.44702	6.25615	8.58422	95.4057	86.5113	96.3448	146.552	114.311	11.6763	11.6817	5.35208	34.2569	20.1643	35.7381	21.2276	14.6856	18.5918	16.0732	0	0	0	0.600254
mir-203b-TTGAACTGTCAAGAACCACTG	0	0	0	0	0	0	0	0	0	0	0	0	0	0	0	0	0	0	0	0	0	0	0	0.868165	0	0	0	0	0	0	14.2521	11.0978	14.1718	24.5217	17.7512	30.8484	34.9075	79.9838	30.5903	27.3102	20.1165	0	0	0	0	3.10937	0	0	0
mir-96-TTTGGCACTAGCACATTTTTG	3.29639	2.66748	26.1845	2.77079	1.76823	1.86235	8.81684	4.58222	1.71084	1.46862	2.76084	0	0	1.99595	0	0	2.2351	0.913175	0	2.64408	0.860191	1.46962	0.969035	474.888	460.038	509.129	0	1.79944	0	0	452.049	359.672	419.199	283.196	233.413	117.195	143.341	99.4593	29.9618	20.801	47.2333	130.903	125.34	147.452	146.159	28.2435	0	12.7442	5.92751
mir-148a-AAAGTTCTGAGACACTCCGAC	0	0	1.08599	2.21663	2.38709	1.05534	0	0	0	0	0	1.45366	0	0	0.78775	1.8414	0.937297	1.42684	2.12909	2.54966	0.860191	0	0.969035	23.2402	17.1266	17.1609	3.10979	0	2.58875	0	8.71774	10.8397	8.33636	7.6785	9.71985	1.29736	1.37431	0	27.657	15.5654	23.5061	1.76897	2.73219	1.70959	3.85757	2.33203	0	0	2.40102
mir-3105-AGAGCAAGCCCGTAAGCAGCG	0	0	0.965331	0	0	0	0	0	0	0	0	0	0	0	0	0	0	0	0	0	0	0	0	9.41631	7.60447	9.02866	0	0	0	0	11.2645	11.3559	14.8863	13.0452	7.66637	25.0823	30.7847	19.9217	24.1998	9.12698	9.80037	4.42242	3.07373	3.20549	4.50052	0	0	0	0
mir-107-GCAGCATTGTACAGGGCTATC	11.7205	15.7085	16.7725	17.2898	19.362	10.5534	4.9658	4.58222	16.5381	15.2203	16.2583	23.4767	20.6177	16.7539	12.801	18.6595	13.2664	10.9011	21.8512	20.114	14.3104	21.0451	12.9545	4.14049	4.6288	4.99459	4.66469	6.74786	7.55052	6.86736	3.42833	3.40677	2.73909	3.22002	2.69235	18.7397	25.6997	38.0592	22.9427	10.8958	9.80037	3.98018	3.41526	5.12878	4.92914	4.40495	0	0	0.975412
mir-7a-GGAAGACTAGTGATTTTGTTG	101.211	382.041	231.678	165.25	141.28	72.0113	17.0257	15.8131	30.2247	27.2363	34.2036	177.638	201.973	141.954	258.185	563.655	208.082	162.546	220.193	229.374	121.756	101.169	93.3846	44.0094	41.1302	48.089	0	0	0	0	63.8647	60.4959	67.4054	65.9689	61.0117	8.50492	17.4538	9.96083	19.9046	16.3437	14.7374	8.40257	5.63517	5.55614	6.4293	0	0	0	10.2043
mir-802-CGGAGAGTCTTTGTCACTCAG	0	0	0	0	0	0	0	0	0	0	0	0	0	0	0	0	0	0	0	0	0	0	0	0	0	0	0	0	0	0	8.32591	6.34898	7.74091	11.7241	12.2753	1.29736	2.06147	0	18.5427	4.88186	4.27385	0	0	0	0	0	0	0	1.35057
mir-130a-GCTCTTTTCACATTGTGCTAC	1.83132	2.0747	3.13731	1.66247	1.41457	0	3.14164	3.05481	0.855418	1.33511	0	2.83465	2.28091	2.5403	3.151	3.43729	1.87461	1.25562	1.68086	0	1.72038	1.82233	2.24408	4.4744	3.43854	4.73846	8.29279	2.24929	4.53033	6.86736	2.79164	3.2003	3.69181	2.64206	2.50982	11.388	13.8806	12.0421	13.3047	6.29694	8.25291	9.50819	7.34281	12.6082	11.1441	5.18229	0	2.03907	0.975412
mir-194-TAACAGCAACTCCATGTGGAA	0	0	0	0	0	0	0	0	0	0	0	0	0	0	0	0	0	0	0	0	0	0	0	17.4301	18.9781	22.0915	0	0	0	0	27.0348	20.3374	22.0318	34.7596	28.475	5.3336	7.97105	6.98744	12.9904	9.26852	9.28458	0	0	0	0	0	0	0	0
mir-802-ATCAGTAACAAAGATTCATCC	0	0	0	0	0	0	0	0	0	0	0	0	0	0	0	0	0	0	0	0	0	0	0	0	0	0	0	0	0	0	8.13006	7.17483	8.69363	16.3478	15.424	1.58566	2.47377	0.892013	11.9428	2.97158	4.20016	0	0	0	0	0	0	0	0
mir-455-ATGCAGTCCACGGGCATATAC	1.95342	2.07469	2.05131	1.44082	2.03345	1.80028	1.21612	2.33603	1.28313	1.2016	1.53379	2.6166	2.37036	2.29837	2.10067	2.82349	3.10031	1.65513	2.01703	3.21067	1.95497	3.76223	5.4062	6.61143	6.67871	6.40333	3.62809	3.14901	2.37302	2.8614	4.16296	5.72957	5.95454	3.79797	5.47598	29.1187	24.3254	32.2611	10.2666	10.6128	5.01071	7.51812	6.83051	6.83834	7.50084	3.88671	0	0	2.55108
mir-200a-AACACTGTCTGGTAACGATGT	9.52292	0	1.08599	0	0	0	0	0	0	0	0	0	0	0	0	0	0.721	0	0	0	0	0	0	982.7	1055.83	1175.14	0	3.59886	1.94156	0	643.837	503.892	628.8	587.529	478.19	536.388	549.726	467.563	10.1618	6.86295	7.81081	176.453	151.808	172.028	191.593	16.5833	0	7.64655	4.65197
mir-203-TGTGAAATGTTTAGGACCACT	0.732532	0	0	0	0	0	0	0	0	1.06809	1.53379	0	0	0	0	0	0	0	0	0	0	1.41084	0	7.21247	8.99313	8.38833	0	0	0	0	37.7116	28.493	30.3682	32.035	28.2013	10.0906	8.10846	12.6369	9.63804	12.0986	8.40029	4.42242	1.87839	2.77809	18.8593	30.8346	0	13.254	0
mir-194-CTGTAACAGCAACTCCATGTG	0	0	0	0	0	0	0	0	0	0	0	0	0	0	0	0	0	0	0	0	0	0	0	9.01557	9.25762	9.92513	0	0	0	0	12.8807	8.36209	10.9564	17.999	12.686	6.91926	7.14644	6.24409	9.53329	6.57992	4.71596	0	0	0	0	0	0	0	0
mir-802-AGTAACAAAGATTCATCCTTG	0	0	0	0	0	0	0	0	0	0	0	0	0	0	0	0	0	0	0	0	0	0	0	0	0	0	0	0	0	0	6.17099	3.40677	4.52545	10.9811	8.30523	1.58567	1.23688	0.892013	8.69523	1.98105	3.31592	0	0	0	0	0	0	0	0.825349
mir-192-TGCCAATTCCATAGGTCACAG	0	0	0	0	0	0	0	0	0	0	0	0	0	0	0	0	0	0	0	0	0	0	0	9.21594	10.0511	10.7576	0	0	0	0	9.01158	8.56856	9.28908	9.16459	7.48385	3.17133	4.12296	3.86539	8.38092	5.16488	4.93703	0	0	0	0	0	0	0	0
mir-122-GTGGAGTGTGACAATGGTGTT	0	0	0	0	0	0	0	0	0	0	0	0	0	0	0	0	0	0	0	0	0	0	0	0	0	0	0	0	0	0	0	0	0	0	0	0	0	0	7.54281	5.94315	6.2634	0	0	0	0	0	0	0	0
mir-455-GTATGTGCCTTTGGACTACAT	1.46506	1.18554	1.68932	1.88414	1.85663	0	0	1.5274	0.997985	1.33511	1.22704	0	1.25227	1.57257	0.656455	1.59588	1.2978	1.14147	0	1.69978	1.87678	1.88112	1.88707	5.87683	5.22394	5.69896	2.85066	1.79944	0	0	7.3464	6.0909	10.1227	5.53182	7.43822	15.8566	14.5678	13.8262	6.8095	12.8061	5.96863	6.85475	5.9767	7.26575	6.85791	0	0	0	1.20051
mir-122-TGTGACAATGGTGTTTGTGTC	0	0	0	0	0	0	0	0	0	0	0	0	0	0	0	0	0	0	0	0	0	0	0	0	0	0	0	0	0	0	0	0	0	0	0	0	0	0	6.28569	1.48579	2.57904	0	0	0	0	0	0	0	0
mir-455-ATGTGCCTTTGGACTACATCG	0	0	0.844662	0	0	0	0	0	0	0	0	0	0	0	0.656455	0	1.0094	0	0	0	0	0	1.22404	3.60624	2.57891	3.39377	1.81405	2.2493	0	2.8614	4.01603	3.76809	5.00182	2.80719	3.05742	10.8113	8.93306	10.2582	6.18094	6.86295	4.12647	3.31682	2.21991	3.41919	4.28619	0	0	0	1.05044
mir-200b-AATACTGCCTGGTAATGATGA	3.05221	0	0	0	0	0	0	0	0	0	0	0	0	0	0	0	0	0	0	0	0	0	0	635.231	696.97	765.326	0	1.79944	1.5101	0	407.089	361.995	401.336	360.642	288.538	276.771	299.052	256.305	5.97138	3.5376	4.42122	107.022	81.7954	106.849	109.512	11.6601	0	4.84283	1.50063
mir-3105-ACTGCTTATGAGCTTGCACTC	0	0	0	0	0	0	0	0	0	0	0	0	0	0	0	0	0	0	0	0	0	0	0	1.53599	1.38864	1.47277	0	0	0	0	4.11399	4.23265	4.76364	4.12823	2.64672	6.77512	6.45928	5.35208	5.97138	1.98105	2.50536	0	0	0	0	0	0	0	0
mir-1948-TATGAGTATTCTGCCTAAATG	0	0	0	0	0	0	0	0	0	0	0	0	0	0	0	0	0	0	0	0	0	0	0	0	0	0	0	0	0	0	0	0	0	0.74308	0.775763	0	0	1.18935	5.65711	34.0317	35.3697	0	0	0	0	0	0	0	0
mir-1948-TTTAGGCAGAGCACTCGTACA	0	0	0	0	0	0	0	0	0	0	0	0	0	0	0	0	0	0	0	0	0	0	0	0	0	0	0	0	0	0	0	0	0	0	0	0	1.09945	1.18935	5.44759	29.4328	28.7379	0	0	0	0	0	0	0	0
mir-192-GCTGCCAATTCCATAGGTCAC	0	0	0	0	0	0	0	0	0	0	0	0	0	0	0	0	0	0	0	0	0	0	0	10.9522	12.8284	12.1664	0	0	0	0	11.1176	11.0978	10.7182	13.1277	13.0054	3.02718	3.71065	2.67604	5.02855	2.83007	4.64228	0	0	0	0	0	0	0	0
mir-148a-AGTGCACTACAGAACTTTGTC	0	0	0	0	0	0	0	0	0	0	0	0	0	0	0	0	0	0	0	0	0	0	0	4.80831	3.57079	3.32973	0	0	0	0	2.00802	2.06471	2.62	1.32103	1.41463	0	0	0	4.92378	4.66964	6.33709	0	0	0	0	0	0	0	0.750317
mir-194-CAGTGGGGCTGCTGTTATCTG	0	0	0	0	0	0	0	0	0	0	0	0	0	0	0	0	0	0	0	0	0	0	0	4.40762	5.15781	4.99459	0	0	0	0	4.40784	4.28427	4.04909	3.88053	2.96615	2.88303	1.78661	1.63536	4.81902	2.26406	2.21061	0	0	0	0	0	0	0	0
mir-192-ACCTATGAATTGACAGCCAGT	0	0	0	0	0	0	0	0	0	0	0	0	0	0	0	0	0	0	0	0	0	0	0	3.20554	3.37242	4.2262	0	0	0	0	4.75068	3.81972	4.88273	5.69695	4.65458	1.58567	1.51174	0.892013	4.6095	3.46684	3.09485	0	0	0	0	0	0	0	0
mir-3073a-TTGATGTCCACTGTGACCATA	0	0	0	0	0	0	0	0	0	0	0	0	0	0	0	0	0	0	0	0	0	0	0	0	0	0	0	0	0	0	0.73464	0.825883	0	0	0	0.864909	0	1.33802	4.19046	3.18384	3.90542	0	0	0	0	0	0	0	0
mir-32-ATATTGCACATTACTAAGTTG	0.732532	1.03735	1.32732	0	1.67981	0.807022	0.810747	0	1.4257	1.60213	1.84056	1.59903	1.25227	1.63305	1.24727	1.35037	1.29781	0.799031	1.68086	1.51091	2.11138	2.3514	1.47905	3.87336	3.96755	3.45779	1.5549	2.69915	2.1573	0	5.48532	5.31662	6.19272	4.78873	5.38471	16.2891	12.7811	14.1235	4.08569	2.54707	3.53697	8.4026	4.43984	8.33425	7.07222	0	0	2.03907	2.17592
mir-31-GCTATGCCAACATATTGCCAT	1.0988	1.92651	2.17198	1.99498	1.76823	1.1795	0	0	1.42569	1.33511	1.07366	0	1.29699	0	0.919039	0	0	1.02732	1.79293	2.17193	0.860191	2.88046	1.07104	0	0	0	0	0	0	0	18.9537	17.8081	18.5782	39.053	34.3161	1.15321	0	0	3.98093	3.25458	4.4949	0	0	0	0	0	0	0	0
mir-210-ACTGTGCGTGTGACAGCGGCT	2.56385	2.07469	3.25797	3.32496	5.92354	2.73146	1.11477	1.34771	3.70681	2.93725	3.68111	3.41611	3.26484	3.44755	2.75712	3.68281	2.81191	1.36977	3.24967	4.81601	4.45734	8.40625	5.10019	27.5143	27.8389	27.2782	16.5856	7.64758	8.84489	14.8793	2.88959	3.66486	5.24	2.39436	1.55153	8.07249	7.55873	4.3114	3.87618	2.19331	2.87379	7.96034	3.07373	5.34246	9.00102	8.55078	0	2.80374	2.55108
mir-451a-CGTTACCATTACTGAGTTTAG	0	0	0	0	0	0	0	0	0	1.06809	0	0	0	0	0	0	0	0	0	0	0	0	0.918033	0	0	0	13.4758	8.09745	17.0426	34.9092	0	0	0	0	0.638864	8.07249	9.20793	17.0969	3.87617	9.90525	6.41078	12.6039	5.80593	15.3863	16.0732	3.10937	0	2.54884	5.02713
mir-1948-ATATGAGTATTCTGCCTAAAT	0	0	0	0	0	0	0	0	0	0	0	0	0	0	0	0	0	0	0	0	0	0	0	0	0	0	0	0	0	0	0	0	0	0	0	0	0	0	3.77141	21.4378	20.485	0	0	0	0	0	0	0	0
mir-182-TTGGCAATGGTAGAACTCACA	0	0	3.98197	0	0	0	0	0	0	0	0	0	0	0	0	0	0	0	0	0	0	0	0	79.8717	78.8884	81.1302	0	0	0	0	70.0359	60.1862	62.5227	44.6674	32.9472	16.5774	17.1789	12.4882	3.66665	2.05181	4.27385	14.1517	14.0026	16.2411	15.4303	4.40495	0	4.58793	0
mir-21a-AACAGCAGTCGATGGGCTGTC	0	0	0	0	0	0	0	0	0	0	0	0	0	0	0	0	0	0	0	0	1.09479	1.29326	0	6.27752	5.55456	6.46736	0	0	0	0	10.5299	12.4399	15.4819	5.28412	5.24781	1.87397	2.88607	5.35208	3.66665	6.29694	5.60023	2.43233	2.90297	2.56439	3.42896	2.85026	0	0	4.05171
mir-122-TCAAACGCCATTATCACACTA	0	0	0	0	0	0	0	0	0	0	0	0	0	0	0	0	0	0	0	0	0	0	0	0	0	0	0	0	0	0	0	0	0	0	0	0	0	0	3.56189	3.11308	3.53698	0	0	0	0	0	0	0	0
mir-203-AGTGGTTCTTGACAGTTCAAC	0.976705	0	0	0	0	0	0	0	1.28313	1.33511	0	0	0	0	0	0	0	0	0	0	0	0	0	3.94015	4.69492	4.4183	0	0	0	0	17.6314	14.8143	15.72	17.3385	10.6782	3.45964	3.9855	6.24409	3.56189	5.02339	4.12647	2.65345	2.21991	1.92329	5.57206	13.2148	0	2.80374	0
mir-450a-ATTGGGGATGCTTTGCATTCA	1.46506	1.33373	0.844662	0	0	0	0	0	0	1.46862	0	0	0	1.0887	0.919039	1.16622	0.937304	0	0	0	1.01659	0	0	1.20208	0.85964	1.21663	2.0732	0	1.94156	4.00599	1.07747	1.18721	1.31	1.1559	1.41463	8.07249	9.34535	9.06877	3.56189	1.69805	1.62111	3.0957	5.63517	5.12876	7.71515	0	0	0	0.825349
mir-126a-ACATTATTACTTTTGGTACGC	0.854618	1.33373	1.08599	0	0	0.744942	0	0	0.997985	0	0	0	1.07337	0	0	0	0.8652	0.741955	0	1.41647	0.938388	0	0	0.801388	0	1.21664	7.77449	3.59888	7.98198	7.43966	1.07747	1.13559	1.07182	0	1.36899	3.17133	4.12295	4.01406	3.45713	1.55654	1.47374	13.4884	11.0996	11.9671	10.7155	0	0	2.29397	0
mir-187-CGTGTCTTGTGTTGCAGCCGG	5.61607	8.00242	6.27462	111.719	135.269	76.1704	8.9182	8.44565	2.56625	2.80373	3.98788	86.5658	21.3333	37.8021	12.1445	14.5471	20.4044	74.595	127.409	137.681	56.8507	26.9235	53.0419	3.13876	2.44665	3.32973	5.18298	1.79944	1.94156	6.29509	1.81211	1.60015	1.42909	2.31181	1.82532	36.7587	39.9926	46.3847	3.45713	2.26406	2.06324	13.7095	11.0996	11.9671	12.0014	0	0	0	2.25095
mir-222-CAGCTACATCTGGCTACTGGG	26.2491	34.529	31.8557	24.9372	29.6176	13.9056	4.86446	5.84008	21.2429	23.0974	23.7738	55.0212	39.4464	43.3061	18.5777	23.9996	16.583	24.9982	42.4698	43.9108	19.3934	14.2848	16.7796	3.80658	3.43854	4.2262	2.85064	0	2.37302	0	1.86109	1.80662	1.19091	1.56872	1.77969	15.1359	18.5532	15.6102	3.35236	2.47632	2.43167	9.28707	9.39196	11.5397	13.0729	2.59115	0	0	1.72573
mir-15a-GTAGCAGCACATAATGGTTTG	0	0	0.965322	1.32998	2.56392	1.11742	1.01343	0	1.14056	1.2016	1.84055	1.67171	1.07338	1.27015	0.656455	1.16622	1.29781	1.0844	2.1291	2.26637	2.26777	1.88112	1.78506	1.60277	1.38864	0.960496	2.33235	0	1.5101	0	1.17543	1.39368	1.54818	1.40359	1.18646	2.73888	3.84809	3.71672	3.14284	1.48579	1.40005	2.21121	1.53686	2.35069	0	2.33203	0	0	0.750317
mir-192-AGTACTCTTTTCTCTCCTCTG	0	0	0	0	0	0	0	0	0	0	0	0	0	0	0	0	0	0	0	0	0	0	0	4.60796	2.90954	1.28067	0	0	0	0	8.57079	9.39442	11.6709	5.28412	0	2.30642	2.06147	2.67604	3.14284	0	0	0	0	0	0	0	0	0	0
mir-92a-AGGTTGGGATTTGTCGCAATG	0	0	0	1.32999	1.32617	0	0	0	0	0	0	1.23561	0.98392	0	0	0	1.2257	0	0	1.41647	1.17298	1.46962	1.78506	8.01388	6.74483	9.02866	4.40554	4.04872	3.23593	4.00596	13.1256	16.3112	16.0773	11.9718	10.9976	3.89209	5.35984	5.50075	3.14284	2.90082	3.83172	4.64354	6.83051	5.76986	5.35773	5.70052	0	4.58792	9.60406
mir-505-GTCAACACTTGCTGGTTTTCT	3.54057	5.18674	4.46463	7.97989	8.39904	4.46966	1.72283	2.06649	2.70882	2.93725	3.0676	5.59661	4.06986	3.629	4.66085	6.75182	5.69592	5.47906	6.94757	8.87658	4.92655	7.05419	5.4572	0	0.727382	0	0	1.79944	2.15728	0	1.2244	1.34206	1.90545	1.32103	1.55153	2.30642	2.06146	1.78403	3.03808	1.20278	1.25268	2.87457	3.07373	3.20547	4.71481	2.33203	0	0	1.72573
mir-455-TGCAGTCCACGGGCATATACA	0.732532	1.03735	0.844662	0	0	0	0	0.898476	0	0	0	0	0	1.02822	0.853398	0.982083	0.793104	0	0	1.51091	1.17299	1.76355	1.73406	2.93841	1.85152	2.4973	1.81405	1.79944	0	0	1.56724	1.755	2.73908	1.32103	1.77969	13.9827	12.2314	13.8263	2.93332	3.04233	1.17899	3.0957	2.73221	2.77809	2.57172	0	0	0	0.825349
mir-450a-TTTGCGATGTGTTCCTAATAT	0	0	0	0	0	0	0	0	0	0	0	0	0	0	0	0	0	0	0	0	1.72038	0	0	2.27059	0	0	6.21958	5.84816	3.6674	5.7228	1.76315	1.70338	2.02454	2.55949	2.37292	11.8204	11.2694	9.96083	2.82856	1.7688	2.43167	9.72929	7.85509	11.326	14.5731	0	0	0	1.05044
mir-874-CGGCCCCACGCACCAGGGTAA	15.2611	25.7856	20.8751	23.2747	28.0263	12.9744	8.9182	8.17613	15.3975	19.2256	18.8657	34.3791	26.8343	26.9756	14.2452	20.501	12.9781	19.6904	35.0739	36.3562	15.2488	25.1599	14.8416	0	0	0	5.96045	2.69915	3.66739	6.29509	0	0	0	0	0	31.425	26.2494	26.3144	2.7238	1.69805	2.21061	3.0957	0	1.92329	0	0	0	0	0
mir-222-GGCTCAGTAGCCAGTGTAGAT	7.32532	8.59519	9.41195	6.09574	7.33811	3.16601	0.912084	1.43756	8.69676	7.34311	10.7366	19.1884	9.70504	12.8225	4.79214	4.29661	3.74922	8.4469	10.3093	12.0873	5.39574	2.76289	3.87614	2.27059	1.45476	2.68941	4.92383	2.24929	2.58875	6.29509	1.51826	2.06471	1.78636	1.32103	0.958296	5.0453	7.00901	6.39276	2.72379	3.5376	1.6948	6.63363	5.97671	5.55616	6.64361	2.85026	0	0	2.85121
mir-542-CTCGGGGATCATCATGTCACG	1.58715	1.48193	1.08599	2.77079	0	0.931176	0	0	1.14056	0	1.22704	1.23562	1.61005	1.20967	1.83808	1.28898	1.65831	1.19855	1.56881	1.69978	1.95497	1.52841	1.17304	2.27059	0.991884	0.960496	9.58853	8.5473	5.60896	10.3011	1.91007	1.4453	1.31	2.97231	2.19039	12.2529	10.9946	11.7449	2.61904	1.98105	1.98955	11.9405	14.8564	14.3178	19.0736	4.66405	0	4.84281	1.50063
mir-1839-AAAGGTAGATAGAACAGGTCT	3.90683	5.18675	4.46463	3.76827	5.39307	3.10392	1.01343	1.16802	2.28111	2.93724	4.90815	5.6693	4.56182	4.17335	3.08535	6.19939	4.03762	3.881	7.28375	6.98794	4.30095	4.23251	3.26412	1.26886	2.24828	1.60084	0	0	0	0	0.73464	0.980735	0	1.23847	1.00393	2.59473	3.43579	3.56805	2.51428	1.6273	1.32637	3.53794	1.36611	1.70959	3.00034	0	0	0	1.6507
mir-214-GCCTGTCTACACTTGCTGTGC	0	0	0	0	0	0	0	0	0	0	0	0	0	0	0	0	0	0	0	0	0	0	0	4.34083	4.03367	6.14719	7.2562	4.94844	4.96177	3.43369	4.11399	4.28427	7.50272	4.78873	4.56331	3.60378	5.35984	4.90607	2.51427	1.27353	2.06324	5.52803	4.6106	3.84658	5.57204	3.10937	0	2.54884	1.35057
mir-201-TACTCAGTAAGGCATTGTTCT	0.854618	1.77832	1.44799	0	0	0	1.72282	1.43756	1.8534	1.46862	0	0	1.47589	0	0.722103	1.10484	0	0	0	0	0	0	0	2.07025	1.38864	2.36923	20.9911	16.6448	17.4741	18.313	0	0	0	0	0	1.15321	0	0	2.40952	2.19331	3.53697	0	1.70763	2.13699	0	5.18229	0	0	0
mir-32-ATTGCACATTACTAAGTTGCA	1.34298	0	1.08599	1.88414	1.59139	0.993256	0	0	0.997985	1.2016	1.22704	0	1.11809	1.57257	0.853398	1.90279	0	0	0	0	1.56399	2.11626	1.53006	4.00692	3.96755	3.90603	0	3.59886	1.72584	0	7.93414	7.58783	8.09818	7.18309	6.29738	10.2347	11.9566	12.0421	2.40952	2.68857	3.02117	4.86466	5.12287	5.12876	5.35775	0	0	0	1.95082
mir-21a-CTTATCAGACTGATGTTGACT	0	0	0	0	0	0	0	0	0	0	0	0	0	0	0	0	0	0	0	0	0	0	0	5.67648	4.56268	4.6104	0	0	0	0	7.15048	7.58783	7.97909	3.63284	4.10698	1.29736	1.23688	2.3787	2.40951	3.04233	4.27385	0	0	0	0	0	0	0	0.975412
mir-671-GGAAGCCCTGGAGGGGCTGGA	3.66265	8.00242	7.60194	3.98994	4.86262	2.42106	1.72283	0.898476	4.56222	5.07342	4.60139	6.32344	5.8141	5.62495	4.8578	7.42699	4.68652	2.79661	7.3958	7.08238	3.90996	5.40821	3.87614	1.20208	1.52089	1.60084	2.33234	2.24929	0	0	1.0285	1.23883	0	1.40359	1.41463	3.74794	2.19891	2.52737	2.40951	0.849025	1.03162	2.21121	2.21991	1.92329	0	0	0	0	0.750317
mir-505-TCAACACTTGCTGGTTTTCTC	0.732532	0	0	2.32747	2.4755	0	0	0	0	1.86916	0	1.81708	0	0	1.50985	1.28898	1.3699	1.14147	2.01703	3.96613	1.09478	1.23449	1.98907	0	0	0.83243	0	0	0	0	1.07747	1.80662	1.54818	1.56872	1.04956	1.00907	1.09946	0	2.30475	1.41504	0.810557	0	0	1.92329	0	0	0	0	0
mir-101b-CAGTACTGTGATAGCTGAAGA	0	0	0	0	0	0	0	0	0	0	0	0	0	0	0	0	0	0	0	0	0	0	0	0	0	0	0	0	0	0	0	0	0	0	0	0	0	0	2.30475	2.54707	1.84218	0	0	0	0	0	0	0	0
mir-148a-GTCAGTGCACTACAGAACTTT	0	0	0	0	0	0	0	0	0	0	0	0	0	0	0	0	0	0	0	0	0	0	0	1.73634	1.7854	1.79293	0	0	0	0	1.12645	0.877502	1.07182	0.74308	0.867032	0	0	0	2.30475	1.48579	1.76849	0	0	0	0	0	0	0	0.600254
mir-7219-TATCCGGGTTTCTAACACACT	0	0	0	0	0	0	0	0	0	0	0	0	0	0	0	0	0	0	0	0	0	0	0	0.868165	0	0	0	0	0	0	0	0	0	0.990771	0	0	0	0	2.30475	1.27353	1.76849	0	0	0	0	0	0	0	0.825349
mir-98-TATACAACTTACTACTTTCCT	2.44177	3.11205	3.74064	4.32244	2.38709	1.98651	1.4188	1.8868	1.28313	2.67022	1.99394	3.34343	2.99649	3.38706	2.49454	3.56005	2.45141	1.48392	3.1376	3.30511	3.44076	5.11429	2.7031	3.13877	2.71116	2.81746	2.07319	3.14901	5.1775	5.72282	2.69369	3.25192	2.38182	4.45847	3.19432	4.90114	5.6347	4.3114	2.19999	2.19331	1.54743	3.98018	2.39067	2.56439	3.85757	2.59115	0	2.29397	1.4256
mir-192-GGCTGCCAATTCCATAGGTCA	0	0	0	0	0	0	0	0	0	0	0	0	0	0	0	0	0	0	0	0	0	0	0	3.07198	5.35619	4.93056	0	0	0	0	5.63225	6.03927	5.00182	14.4488	13.3249	1.44152	0	1.18935	2.19999	1.83955	1.98955	0	0	0	0	0	0	0	0
mir-330-GCAAAGCACAGGGCCTGCAGA	167.017	250.298	267.154	289.05	324.115	178.042	37.1929	34.7709	146.704	157.276	171.325	304.181	246.697	247.739	262.255	374.91	294.53	207.006	327.656	360.162	249.142	387.04	291.577	8.88202	9.12537	9.92513	2.0732	3.149	2.1573	2.8614	3.37935	3.51	4.28727	4.12822	3.05742	12.5412	14.4303	13.0828	2.09523	1.41504	1.76849	12.825	13.661	10.8986	12.2157	0	0	2.80374	1.50063
mir-674-TGCACTGAGATGGGAGTGGTG	10.7438	11.7073	13.2732	24.2722	26.6117	16.637	5.67521	6.01977	14.2569	17.757	18.0988	13.6645	9.74976	8.70961	9.97817	12.767	11.7523	13.7547	27.0058	23.5136	16.5782	18.5761	17.4936	3.40588	2.18215	2.6894	2.07319	2.2493	3.66739	2.8614	2.79164	2.47765	2.38182	3.30257	2.60108	5.18946	5.35983	4.90607	2.09523	0.990529	1.6948	5.52803	4.26906	7.05204	4.50052	0	0	0	0.600254
mir-31-GCAAGATGCTGGCATAGCTGT	0	0	0	0	0	0	0	0	0	0	0	0	0	0	0	0	0	0	0	0	0	0	0	0	0	0	0	0	0	0	5.77917	5.67795	6.66908	8.58668	7.30134	1.00906	1.23688	0	2.09523	1.34428	2.13692	0	0	0	0	0	0	0	0
mir-3535-ATTACCTGAGAAATAATTGAT	1.83133	2.81566	3.37864	4.65494	6.36559	4.22134	1.01343	1.34771	2.42368	1.86916	1.38041	5.01515	2.45981	3.32659	2.2976	3.43728	2.16301	3.881	5.60289	6.13806	2.58057	2.3514	2.55009	1.80311	1.78539	2.17713	2.33234	3.14901	2.37302	0	2.00802	2.58088	1.42909	1.65129	1.87096	6.19851	4.67268	5.35208	2.09523	2.68858	3.75804	2.65345	2.56145	4.06028	3.64327	3.10937	0	0	4.27681
mir-19b-TGCAAATCCATGCAAAACTGA	0	0	0	0	0	0	0	0	0	0	0	0	0	0	0	0	0	0	0	0	0	0	0	3.07198	3.30629	3.6499	0	3.59888	0	0	4.01603	5.00692	4.04909	3.7154	3.14869	4.46869	3.71065	3.27071	2.09522	1.9103	2.72642	0	3.75678	3.84657	5.78637	0	0	0	2.10089
mir-455-CATGCAGTCCACGGGCATATA	0	0	0	0	0	0	0	0	0	0	0	0	0	0	0	0	0	0	0	0	0	0	0	0.734603	0	0	0	0	0	0	0.930542	1.08397	1.54818	0	0.775763	4.46869	5.2224	3.56805	1.99046	1.55654	0.589494	0	1.53687	0	0	0	0	0	0
mir-1948-TATATGAGTATTCTGCCTAAA	0	0	0	0	0	0	0	0	0	0	0	0	0	0	0	0	0	0	0	0	0	0	0	0	0	0	0	0	0	0	0	0	0	0	0	0	0	0	1.88571	12.5231	12.5268	0	0	0	0	0	0	0	0
mir-744-CTGTTGCCACTAACCTCAACC	3.66265	4.44578	3.37863	4.65495	3.35962	2.48314	1.92552	2.51573	3.42167	4.53938	4.90815	5.59662	4.06987	5.0806	2.88841	4.72627	2.73981	2.28294	4.14613	5.19374	4.14455	3.93859	2.8051	1.06851	1.45476	1.79293	0	2.24929	0	0	1.86109	1.49691	2.02454	1.81642	1.36899	3.17133	2.47376	2.08136	1.88571	0.990525	1.32637	2.65345	1.87839	0	2.78603	0	0	0	0
mir-7a-GAAGACTAGTGATTTTGTTGT	14.4064	53.3494	32.2177	24.6046	18.5663	9.18761	1.92551	2.69541	4.84736	5.07342	4.29463	23.3314	24.8665	18.024	34.0702	75.1907	27.326	20.4894	32.8327	28.3295	19.0024	14.0496	13.6174	6.81178	4.56269	5.57089	0	0	0	0	8.96262	8.56856	10.3609	10.238	7.712	2.88303	2.74862	0	1.88571	2.19331	1.6948	0	0	0	0	0	0	0	1.72573
mir-122-CAAACGCCATTATCACACTAA	0	0	0	0	0	0	0	0	0	0	0	0	0	0	0	0	0	0	0	0	0	0	0	0	0	0	0	0	0	0	0	0	0	0	0	0	0	0	1.78095	0.919775	1.03162	0	0	0	0	0	0	0	0
mir-152-CAGTGCATGACAGAACTTGGG	0	0	0	0	0	0	0	0	0	0	0	0	0	0	0	0	0	0	0	0	0	0	0	1.60278	1.25639	1.28067	0	2.69915	0	3.43369	1.32235	1.49691	1.54819	0.990771	1.00393	3.45964	2.88607	2.97338	1.78095	0.707521	0	1.99009	1.3661	0	0	0	0	0	0
mir-191-CTGCACTTGGATTTCGTTCCC	2.0755	4.2976	3.1373	3.98994	4.86261	2.23483	1.72283	1.43756	1.28313	2.4032	1.99393	4.14295	3.22012	4.29432	2.03502	3.56005	1.87461	2.39709	3.80996	4.81603	2.58057	3.29196	2.39709	1.1353	1.19026	1.1526	2.0732	1.79944	1.29437	0	1.91007	1.90986	2.14363	2.22924	1.27772	2.88303	2.06147	1.78403	1.78095	0	0.66318	0	0	0	0	0	0	0	0
mir-383-AGATCAGAAGGTGACTGTGGC	332.325	322.172	294.304	827.471	898.874	440.572	24.221	21.7431	320.211	300.266	329.613	132.284	88.1507	69.7979	358.754	561.567	387.034	657.259	983.528	967.17	491.326	403.911	469.421	0.93495	1.05801	1.08856	0	0	0	0	0	0	1.19091	0	0	12.9736	25.15	15.4615	1.78095	0	0	0	0	0	0	2.59115	0	2.29395	2.47605
mir-6972-TTACTGTACCTGTCTCCATAG	0	0	0	0	0	0	0	0	0	0	0	0	0	0	0	0	0	0	0	0	0	0	0	0	0	0	0	0	0	0	0	0	0	0	0	1.29736	1.09946	1.33802	1.78095	0.707521	1.03162	0	0	0	0	0	0	0	0
mir-122-ACGCCATTATCACACTAAATA	0	0	0	0	0	0	0	0	0	0	0	0	0	0	0	0	0	0	0	0	0	0	0	0	0	0	0	0	0	0	0	0	0	0	0	0	0	0	1.67618	1.83955	2.13692	0	0	0	0	0	0	0	0
mir-129-AAGCCCTTACCCCAAAAAGTA	135.763	79.7278	65.4007	407.972	479.453	307.413	271.397	243.935	253.917	324.032	337.742	144.857	64.939	90.4227	85.0112	111.651	106.997	217.507	387.383	386.791	172.507	212.038	187.176	1.66955	1.98377	2.56133	0	0	0	0	0.979517	2.11632	1.90545	0.990771	0.684499	9.2257	4.94754	4.3114	1.67618	0	0.736866	0	0	0	0	0	0	0	0
mir-148a-CAAAGTTCTGAGACACTCCGA	0	0	0	0	0	0	0	0	0	0	0	0	0	0	0	0	0	0	0	0	0	0	0	1.93668	0.991884	0.83243	0	0	0	0	1.12644	0.825883	1.19091	1.23847	1.23209	0	0	0	1.67618	1.13203	1.32637	0	0	0	0	0	0	0	0
mir-429-AATACTGTCTGGTAATGCCGT	3.29639	0	0	0	0	0	0	0	0	0	0	0	0	0	0	0	0	0	0	0	0	0	0	255.241	271.116	294.617	0	0	0	0	152.169	136.58	162.916	133.176	108.105	138.097	148.014	124.881	1.67618	1.06128	1.54743	31.3992	29.5419	35.2603	37.2898	5.70052	0	2.29397	0.525222
mir-500-ATGCACCTGGGCAAGGGTTCA	2.31969	4.44578	3.74063	3.65746	4.24373	2.6073	1.11477	1.25786	1.42569	2.00266	3.22096	3.05269	4.11459	2.47983	3.28229	6.44491	2.95611	3.0249	5.71494	4.81603	3.51896	4.46766	4.33516	1.66955	1.65314	1.40874	0	0	0	0	1.07747	0.929122	1.31	1.07334	0.867026	3.89209	3.9855	3.27071	1.67618	0.919775	1.76849	0	2.73221	2.13697	3.64327	0	0	0	0.900381
mir-511-CATGCCTTTTGCTCTGCACTC	0	0	0	0	0	0	0	0	0	0	0	0	0	0	0	0	0	0	0	0	0	0	0	0	0	0	0	0	0	0	0	0	0	0	0	0	0	0	1.67618	1.41504	2.57904	0	0	0	0	0	0	0	0.825349
mir-17-AAGTGCTTACAGTGCAGGTAG	0	0	1.08599	0	0	0	0	0	0	0	0	1.45366	0	0	0.722103	0	0	0	0	0	0.938388	0	0.867031	4.20728	4.82718	4.86653	2.0732	4.04872	1.29437	2.8614	5.19146	6.24574	4.64454	4.95386	4.56331	4.61284	3.98551	2.23003	1.67618	1.55654	2.43167	2.87457	3.24449	2.99177	6.21499	0	0	3.05862	2.40102
mir-187-AGGCTACAACACAGGACCCGG	1.22088	1.63012	1.44799	63.285	67.8111	43.2067	3.04029	2.69543	0	0	0	15.4089	3.66735	8.10478	2.16631	5.15593	5.04702	34.5294	58.3821	58.1699	20.5663	5.99607	15.3516	0	0.991884	1.1526	0	0	0	0	0.685664	0	0	0	0	14.4152	15.6672	16.2049	1.57142	0.990525	0.95793	2.43233	2.04915	2.77809	2.14311	0	0	0	0.525222
mir-203b-TGAACTGTCAAGAACCACTGG	0	0	0	0	0	0	0	0	0	0	0	0	0	0	0	0	0	0	0	0	0	0	0	0	0	0	0	0	0	0	0.832591	1.23882	0	1.73386	1.50589	2.01812	2.74863	6.24409	1.57142	1.6273	1.17899	0	0	0	0	0	0	0	0
mir-294-AAAGTGCTTCCCTTTTGTGTG	0	0	0	0	0	0	0	0	0	0	0	0	0	0	0	0	0	0	0	0	0	0	0	0	0	0	0	0	0	0	0	0	0	0	0	0	0	0	1.57142	1.98105	1.17899	0	0	0	0	0	0	0	0
mir-295-AAAGTGCTACTACTTTTGAGT	0	0	0	0	0	0	0	0	0	0	0	0	0	0	0	0	0	0	0	0	0	0	0	0	0	0	0	0	0	0	0	0	0	0	0	0	0	0	1.57142	1.69805	0.957935	0	0	0	0	0	0	0	0
mir-322-CAAAACATGAAGCGCTGCAAC	0.854618	0	0	0	0	0	0	0	0	0	0	0	0	0	0	0	0	0	0	0	0	0	0	0	0	0	3.62809	6.74786	4.96177	6.86739	0.636689	0.825883	0	0	0.684499	7.49587	8.79563	6.24409	1.57142	0.849025	0.810557	7.297	6.48899	5.34246	7.71515	3.36848	0	2.29397	0.525222
mir-874-TGCCCTGGCCCGAGGGACCGA	13.9181	21.4879	17.9792	16.4031	15.9139	7.88397	7.8034	8.71517	13.6867	11.2149	14.111	33.5071	28.1313	30.907	11.8819	17.5547	12.1849	11.7001	23.532	25.3077	12.6683	17.8706	11.5774	0	0	0	3.36894	4.49859	2.80449	2.8614	0	0	0	0	0	39.93	37.3814	30.9232	1.57142	1.55654	1.62111	0	0	0	0	0	0	0	0
mir-148a-GTGCACTACAGAACTTTGTCT	0	0	0	0	0	0	0	0	0	0	0	0	0	0	0	0	0	0	0	0	0	0	0	0	0	0	0	0	0	0	0	0	0	0	0	0	0	0	1.46666	1.55654	1.76849	0	0	0	0	0	0	0	0
mir-16-TTAGCAGCACGTAAATATTGG	0	0	0	0	0	0	0	0.808629	0	0	0	0	0	0	0	0	0.721	0	1.45674	0	0	0	0	0	0	0.960496	2.33235	0	0	0	0.73464	0	1.07182	1.32103	0.684499	1.44152	0	1.63536	1.46666	0.636767	0	1.76897	0	1.92329	0	0	0	0	1.05044
mir-191-GCTGCACTTGGATTTCGTTCC	1.58716	2.51928	3.61997	4.65494	4.33213	1.98652	0.810747	1.07817	1.42569	1.60213	2.76083	3.77954	3.66735	2.96369	2.56018	3.25315	1.58621	2.51124	3.24967	5.28818	2.73698	3.23317	2.24408	1.93668	2.0499	2.36923	2.59149	0	1.5101	2.8614	2.39983	3.45839	2.85818	2.39437	2.09913	2.73888	2.33634	2.82471	1.46666	0.849021	0.810557	0	0	1.70959	0	0	0	0	1.27554
mir-219a-AGAGTTGCGTCTGGACGTCCC	1.22089	1.48193	2.17198	2.54914	1.94505	1.36573	0.81074	1.16802	1.42569	0	1.07366	1.88976	1.47589	1.33064	1.37856	1.22761	1.5141	1.54099	1.90498	2.92739	1.95497	1.88112	1.68306	1.40243	0	1.1526	2.85064	2.69915	2.58875	0	0	1.29044	0	0.74308	0	2.16228	1.37431	1.04068	1.46666	1.06128	0.589494	0	0	0	0	0	0	0	0.825349
mir-222-CTACATCTGGCTACTGGGTCT	9.64502	13.6338	13.6352	9.86404	10.6093	5.2146	3.74969	1.7071	10.8353	9.47929	11.3501	25.4392	19.3654	18.6289	9.58431	10.3119	8.57996	10.6157	18.0412	18.8864	8.91473	7.52447	7.29326	1.73634	1.45476	0.83243	0	0	0	0	0	0	0	0	0	5.18946	6.047	6.6901	1.46666	0	0	3.0957	4.78136	3.84657	4.28619	0	0	0	0.825349
mir-423-AGGGGCAGAGAGCGAGACTTT	0	0	1.20666	0	1.32617	0	0	0	0	0	0	0	0	0	0.853398	0	0.721	0.741955	0	0	0	1.29326	1.17304	1.46921	1.71927	1.34469	0	0	0	0	0.685664	1.08397	1.78636	1.56872	0.867032	1.72982	1.78661	2.52737	1.46666	0.778271	0.736871	0	2.21991	2.35069	0	0	0	0	1.6507
mir-6978-ACGGCTTCACTCTCACCCTGC	0	0	0	0	0	0	0	0	0	0	0	0	0	0	0	0	0	0	0	0	0	0	0	0	0	0	0	0	0	0	0	0	0	0	0	0	0	0	1.46666	0	0.736871	0	0	0	0	0	0	0	0
mir-101b-CGGTTATCATGGTACCGATGC	0	0	0	0	0	0	0	0	0	0	0	0	0	0	0	0	0	0	0	0	0	0	0	0	0	0	0	0	0	0	0	0	0	0	0	0	0	0	1.3619	1.98105	1.62111	0	0	0	0	0	0	0	0
mir-137-TTGCTTAAGAATACGCGTAGT	27.9583	46.5326	42.4743	32.0305	36.2485	15.83	1.62149	1.34771	17.8212	16.6889	21.3198	65.7784	41.8615	40.403	20.2845	25.5341	14.4922	24.3134	45.2713	48.3491	20.4881	14.3435	17.0346	0.868165	0.727382	1.1526	0	0	0	0	1.12645	0	0	1.07334	0	0	0	0	1.3619	0.707521	0.736871	0	0	0	0	0	0	0	0
mir-148a-AAGTTCTGAGACACTCCGACT	0	0	0	0	0	0	0	0	0	0	0	0	0	0	0	0	0	0	0	0	0	0	0	0	0.793511	0	0	0	0	0	0	0	0	0	0	0	0	0	1.3619	1.06128	1.40005	0	0	0	0	0	0	0	0
mir-16-CTCCAGTATTGACTGTGCTGC	0	0	0	0	0	0	0	0	0	0	0	0	0	0	0	0	0	0	0	0	0	1.29326	0	0.734603	0.925762	0	0	0	0	0	0.73464	0.774263	0	0	0.730128	1.87397	2.06147	2.3787	1.3619	1.06128	1.32637	0	0	0	0	0	0	0	1.05044
mir-203-GAAATGTTTAGGACCACTAGA	0	0	0	0	0	0	0	0	0	0	0	0	0	0	0	0	0	0	0	0	0	0	0	1.06852	0.99189	0.960496	0	0	0	0	4.35887	5.16177	4.64455	6.68768	3.97008	1.44152	1.09946	1.04068	1.3619	1.20278	1.32637	0	0	0	2.14311	3.6276	0	0	0
mir-30b-TGGGATGTGGATGTTTACGTC	0.732532	1.48193	0	0	1.67981	0.931176	2.73626	1.61725	0.997985	1.46862	1.38041	0	0	0	0	0	0.721	0	0	1.41647	1.48578	0	0.969035	1.33564	0	0.896463	2.59149	4.49859	1.5101	0	0	0.774263	0	1.07334	0	3.31548	2.47377	2.82471	1.3619	1.34428	1.54743	1.99009	1.53687	0	0	0	0	0	0
mir-3535-GGATATGATGACTGATTACCT	0.854618	1.33373	1.68932	3.21412	2.56392	1.86236	1.31746	1.61725	0	1.60213	2.14731	3.70686	2.41509	2.11692	1.44421	2.27106	1.8025	2.68246	3.80995	3.11624	2.42418	1.41084	2.90711	0.868165	0.727382	1.34469	0	0	0	0	0.979517	1.85824	0	1.07334	1.41463	2.59473	2.06147	2.08136	1.3619	0.707521	1.25268	2.43233	1.53687	2.99179	2.78603	2.33203	0	0	3.90165
mir-674-CACTGAGATGGGAGTGGTGTA	4.51727	4.89037	5.91261	11.6374	12.3775	7.51153	5.47252	4.22283	7.69876	9.61283	7.20884	4.94245	4.02514	3.68949	3.47922	5.09456	4.75862	6.96298	13.4469	11.2374	7.50712	7.58326	8.31327	1.46921	1.45476	1.47277	0	4.49859	1.94156	3.43369	0.881573	1.13559	2.14363	1.48616	1.00393	2.16228	3.29835	1.18935	1.3619	0.495262	0	6.19139	5.12288	5.76986	5.14345	0	0	0	0.525222
mir-676-CGTCCTGAGGTTGTTGAGCTG	1.58715	4.2976	4.46463	3.21412	3.27121	2.04859	1.01343	0	1.14056	0	1.22704	4.361	2.90704	3.56852	3.93875	5.40145	2.73981	2.79661	3.80996	3.68284	2.65878	1.76355	2.8051	0.868165	0	0	0	0	1.94156	0	0	0	0	0.74308	0	1.29737	1.37431	1.48669	1.3619	0.707521	0	1.99009	0	4.06028	3.00034	0	0	0	0
mir-881-AACTGTGTCTTTTCTGAATAG	0	0	0	0	0	0	0	0	0	0	0	0	0	0	0	0	0	0	0	0	0	0	0	0	0	0	0	0	0	0	0	0	0	0	0	0	0	0	1.3619	1.41504	8.47398	0	0	0	0	0	0	0	0
mir-107-GCTTCTTTACAGTGTTGCCTT	0.854618	1.77832	1.08599	0	1.94505	0	0	0.808629	0	2.26969	1.68717	1.59903	1.25227	1.51209	1.11598	1.35037	0.793104	0.8561	0	1.41647	1.17299	2.17504	1.07104	0	0	0	0	0	0	0	0	0	0	0	0	0.864909	2.19891	2.08136	1.25714	0	0	0	0	0	0	0	0	0	0
mir-1247-CCCGTCCCGTTCGTCCCCGGA	0.976705	0	0	0	0	0	0	0	0	0	0	0	1.78896	0	0	0	0	0	0	0	0	0	0	0	0	0	0	0	0	0	0	0	0	0	0	0	0	0	1.25714	0	0	0	0	0	0	0	0	0	0
mir-187-CTCGTGTCTTGTGTTGCAGCC	3.90683	5.63133	6.27462	164.142	170.633	100.505	6.48595	4.31267	2.56625	3.07075	1.84056	52.332	13.9539	21.4111	11.5537	14.9153	19.9717	89.5486	138.728	141.364	59.6659	24.3957	50.0838	1.93668	1.52089	1.40874	1.5549	0	0	0	0.979524	1.13559	0	0	0	32.2899	33.2585	39.8432	1.25714	1.13203	1.03162	5.74915	4.95212	6.83835	4.28619	0	0	0	1.20051
mir-1981-TAAAGGCTGGGCTTAGACGTG	1.83133	4.74217	2.65465	2.21663	3.00598	1.30365	0	0	3.56424	2.67022	2.45407	1.81708	2.0573	1.14918	2.88842	3.00762	1.94671	1.31269	2.80144	4.24943	1.56399	2.7629	2.29508	0	0.925762	0	0	0	0	0	0	0	0	1.1559	1.18646	2.16227	2.61119	1.93269	1.25714	0.778271	0.663185	0	0	0	0	0	0	0	0
mir-26a-CCTATTCTTGGTTACTTGCAC	3.54057	4.59399	4.82663	7.09324	6.98446	3.22808	0	1.16802	3.70681	4.40587	4.14125	4.50636	3.48846	4.05238	3.08535	4.11247	2.37931	4.56588	6.27522	6.2325	2.89337	3.93859	2.8051	1.80312	3.10792	2.56133	0	0	0	0	2.00802	1.39367	1.78636	2.22924	1.18646	3.02718	3.84809	2.97338	1.25714	0	0.884249	6.63362	5.4644	7.05205	4.28619	0	0	0	0
mir-3084-TTCTGCCAGTCTCCTTCAGAC	0	0	0	0	0	0	0	0	0	0	2.3007	0	0	0	0	0	0	0	0	0	0	0	0	0	0	0	0	0	0	0	0	0	0	0	0	0	0	0	1.25714	0	0	0	0	0	0	0	0	0	0
mir-30a-TTCAGTCGGATGTTTGCAGCT	0	0	0	0	0	0	0	0	0	0	0	0	0	0	0	0	0	0	0	0	0	0	0	0	0.85964	0.896463	0	2.24929	1.5101	2.8614	0	0	0	0	0	4.03624	4.94754	3.12205	1.25714	0.636767	0.589494	3.0957	3.07373	3.63288	3.42896	0	0	0	0
mir-3105-GAGCAAGCCCGTAAGCAGCGT	0	0	0	0	0	0	0	0	0	0	0	0	0	0	0	0	0	0	0	0	0	0	0	0	0	0.896463	0	0	0	0	0.832591	0	0	0.908209	0	2.01812	1.51174	1.04068	1.25714	0	0	0	0	0	0	0	0	0	0
mir-335-GTTTTTCATTATTGCTCCTGA	14.8948	42.235	29.0804	26.2671	32.4468	16.6991	0.912084	1.43756	16.2529	18.558	21.9333	9.5215	13.2383	7.74186	31.1162	47.0172	30.4263	31.5617	49.0812	51.843	19.5497	17.5179	22.6448	1.06851	0.727382	1.1526	1.81405	1.79944	1.72584	0	0.73464	0	0	0	0	0	1.09945	0	1.25714	1.13203	1.03162	1.76897	0	0	0	0	0	0	0.525222
mir-340-CCGTCTCAGTTACTTTATAGC	3.66266	5.77953	4.70596	5.65243	3.80167	3.10393	2.33089	2.33604	3.2791	4.40586	6.13519	4.94247	3.57791	2.41934	4.20133	4.66488	3.89342	1.88343	4.03408	5.09931	3.36256	6.93662	4.38616	1.73634	1.91765	1.47277	3.10981	0	0	0	0.783615	1.08397	2.26272	0.908209	1.09519	3.31548	2.74863	3.12205	1.25714	0.636767	0.810557	2.43233	0	0	0	0	0	0	1.6507
mir-140-CCAGTGGTTTTACCCTATGGT	0.854618	1.77832	0.965322	1.55165	1.32617	0	1.21612	0	0	1.2016	1.68717	1.7444	1.47589	1.51208	1.05033	2.27106	1.3699	0	1.90498	0	2.42417	2.11626	1.17304	1.06851	0.99189	1.28067	5.18301	3.14901	3.88312	4.57826	0.783615	0.929122	1.31	0.990771	0.912661	2.73888	2.88606	3.27071	1.15238	0	0.810557	3.31682	2.56145	3.20547	3.00034	2.33203	0	0	2.25095
mir-1982-TCTCACCCTATGTTCTCCCAC	2.56385	5.33495	3.37864	4.98744	4.42055	4.28342	2.43223	2.60557	1.8534	3.33778	2.14732	3.9249	2.90704	2.41933	3.34794	7.36561	4.39813	4.96541	7.50785	7.46011	4.37914	5.8785	4.53916	0	0	0	0	0	0	0	0	0	0	0	0	1.58567	1.37431	2.08136	1.15238	0.636767	0.589494	0	0	0	0	2.33203	0	0	0
mir-200a-ACACTGTCTGGTAACGATGTT	1.58715	0	0	0	0	0	0	0	0	0	0	0	0	0	0	0	0	0	0	0	0	0	0	184.586	182.044	202.921	0	0	0	0	118.522	98.5381	115.994	105.765	90.9462	74.5263	79.8478	69.8744	1.15238	0.495262	0.810557	23.6598	21.5161	24.789	27.4317	2.85026	0	0	0
mir-221-CTACATTGTCTGCTGGGTTTC	9.03451	10.2253	12.3079	7.6474	8.39903	4.28343	1.41881	1.43756	7.27105	6.54204	5.82841	17.8802	14.1327	12.5806	7.15537	6.69043	5.40752	10.2162	15.9122	16.0534	6.80333	4.7028	5.20219	1.1353	1.32252	0.83243	0	0	0	0	0.685664	0	0	0	0	7.35172	6.047	5.64942	1.15238	0.707521	0.66318	0	0	0	0	0	0	0	0
mir-3073b-CTGGCGCCAACTGTGACCACT	0	0	0	0	0	0	0	0	0	0	0	0	0	0	0	0	0	0	0	0	0	0	0	0	0	0	0	0	0	0	0	0	0	0	0	6.77512	8.10846	6.98744	1.15238	1.06128	0	0	0	0	0	0	0	0	0
mir-31-CTATGCCAACATATTGCCATC	0	0	0	0	0	0	0	0	0	0	0	0	0	0	0	0	0	0	0	0	0	1.29326	0	0	0	0	1.5549	0	0	0	1.61621	1.96147	2.14364	3.05488	3.05742	0	0	0	1.15238	0.778271	1.32637	0	0	0	0	0	0	0	0
mir-32-GCAATTTAGTGTGTGTGATAT	0	0	0	1.32999	0	0	0	0	0	0	0	0	0	0	0.984686	0	0	0	0	0	1.32938	1.5284	0.918033	1.1353	1.32252	1.60084	0	0	0	0	2.15494	1.90986	1.42909	1.81641	1.68842	1.72982	1.92404	1.78403	1.15238	0.778271	0	0	1.3661	0	3.00034	0	0	0	0
mir-3535-AGAAAATTCCTCTAGATAGTC	1.0988	2.0747	1.08599	1.66247	0	1.48988	0	0	0.997985	1.06809	1.22704	1.59903	0	1.51208	1.05033	0	1.2257	0.8561	1.56881	1.60534	0.938388	1.29326	1.47905	1.26886	1.58702	1.85697	0	0	0	7.43966	0	1.29044	0	0.74308	0.775763	1.29737	2.74862	2.52737	1.15238	0.566017	1.1053	0	1.70763	0	0	0	0	0	1.4256
mir-3535-ATTCCTCTAGATAGTCAAGTT	1.22088	1.33373	1.20666	2.65997	1.67981	1.11742	1.62149	1.07817	0	1.46862	1.38041	3.0527	1.25227	1.51208	0	1.28898	1.80251	0.970251	2.1291	1.60534	0.938388	2.17504	1.63206	1.66955	1.19026	1.66487	0	0	0	8.01193	0.73464	1.54853	1.42909	0.825641	1.00393	1.72982	1.92404	2.52737	1.15238	0.778271	0.810557	1.99009	0	0	0	2.33203	0	2.03907	1.72573
mir-362-CAACACACCTGTTCAAGGATT	0	0	0	0	0	0	0	0	0	0	0	0	0	0	0	0	0	0	0	0	0	0	0	0	0	0	0	0	0	0	0	0	0	0	0	1.15321	1.23688	0.892013	1.15238	0	0	0	0	0	0	0	0	0	0.525222
mir-6921-TGACTACTCCTTGCCTCTCAG	0	0	0	0	0	0	0	0	0	0	0	0	0	0	0	0	0	0	0	0	0	0	0	0	0	0	0	0	0	0	0	0	0	0	0	0	0	0	1.15238	0	0	0	0	0	0	0	0	0	0
mir-92a-TTGCACTTGTCCCGGCCTGTT	0	0	0	0	0	0	0	0	0	0	0	0	0	0	0	0	0	0	0	0	0	0	0	0.801388	0	0	0	0	0	0	0	0.774263	0.952727	1.48616	0.638864	0	0	0	1.15238	0.919775	1.40006	0	0	0	0	0	0	0	1.12548
mir-130a-AGCTCTTTTCACATTGTGCTA	0	0	0	0	0	0	0	0	0	0	0	0	0	0	0	0	0	0	0	0	0	0	0	0	0	0	0	0	0	0	0	0	0	0	0	1.00907	0	1.63536	1.04762	0.849025	0	0	0	0	0	0	0	0	0
mir-186-AAGAATTCTCCTTTTGGGCTT	1.46506	1.63013	2.29265	2.99246	2.74074	1.7382	0.810747	0	0	2.80374	1.68717	2.83465	1.52061	1.8145	1.77244	2.1483	1.9467	0.913182	3.58584	3.11625	2.03317	2.99804	1.88707	0	0.793511	0.83243	0	0	1.72584	0	0.881566	1.18721	1.07182	0.74308	0.684499	1.58566	1.51174	2.3787	1.04762	0	0	2.21121	1.3661	0	0	0	0	0	0.750317
mir-191-CGGAATCCCAAAAGCAGCTGT	0	0	0	0	0	0	0	0	0	0	1.53379	0	0	1.02822	0	0	0	0	0	0	0	0	0	2.93841	2.18215	2.94553	0	0	1.72584	0	3.42833	2.47765	2.5009	1.73385	1.59715	1.87397	1.64918	1.63536	1.04762	0.849025	0	0	0	0	0	0	0	0	1.05044
mir-1948-TTAGGCAGAGCACTCGTACAG	0	0	0	0	0	0	0	0	0	0	0	0	0	0	0	0	0	0	0	0	0	0	0	0	0	0	0	0	0	0	0	0	0	0	0	0	0	0	1.04762	4.31587	3.75804	0	0	0	0	0	0	0	0
mir-21a-ACAGCAGTCGATGGGCTGTCT	0	0	0	0	0	0	0	0	0	0	0	0	0	0	0	0	0	0	0	0	0	0	0	3.60624	3.76918	3.2657	0	0	0	0	5.14249	4.9553	6.19272	2.47694	2.37292	1.29737	0	1.78403	1.04762	2.54707	1.62111	0	0	0	0	0	0	0	1.80076
mir-501-ATGCACCCGGGCAAGGATTTG	1.83133	3.40844	2.17198	3.54662	3.80167	1.86235	0.912084	1.79695	1.14056	2.2697	1.53379	3.99758	3.04121	2.72175	3.15099	4.97179	3.10032	2.39709	3.80995	3.39954	2.58057	3.70345	3.00911	1.73634	1.45476	1.5368	0	0	0	0	1.12645	1.34206	1.66728	1.1559	1.36899	3.02718	3.43579	3.56805	1.04762	0.849025	0.663185	0	0	1.92329	0	0	0	0	1.12548
mir-7015-TCTCACTGTCCTCTGCACTAG	2.31968	2.37109	2.17198	5.31993	6.01196	3.04185	1.82418	1.5274	1.42569	3.07075	2.14732	4.65173	2.72815	3.50805	1.90373	2.51659	2.0909	2.79661	5.37877	6.23248	3.67536	3.23317	2.8561	0	0	0	0	0	0	0	0	0	0.952727	0	0	0	0	1.33802	1.04762	0	0	0	0	0	0	0	0	0	0.825349
mir-1198-ATGTGTTCCTGGCTGGCTTGG	2.80803	3.85302	3.86131	7.53656	10.0788	4.59381	2.33088	2.06649	1.56827	3.47129	1.99394	4.43368	3.44374	2.90319	3.74181	4.35799	3.46082	5.02247	8.85254	9.72648	5.00475	4.35009	5.25319	0.868165	1.52089	1.28066	0	0	1.5101	0	1.42031	1.08397	1.54818	1.23847	1.36899	2.73888	3.4358	1.93269	0.942854	0	0.663185	0	0	2.56439	0	0	0	2.54884	1.35057
mir-12182-AATTAGGCTCTGGATCTGTGA	0	0	0	0	0	0	0	0	0	0	0	0	0	0	0	0	0	0	0	0	0	0	0	0	0	0	0	0	0	0	0	0	0	0	0	0	0	0	0.942854	0	0	0	0	0	0	0	0	0	0
mir-141-TCCATCTTCCAGTGCAGTGTT	0	0	0	0	0	0	0	0	0	0	0	0	0	0	0	0	0	0	0	0	0	0	0	118.805	116.381	131.012	0	0	0	0	105.69	87.6468	96.8206	95.5273	81.6376	16.8658	23.0885	13.8262	0.942854	0	0	41.7918	37.2262	42.9534	36.4327	0	0	0	1.12548
mir-151-TACTAGACTGAGGCTCCTTGA	1.58715	1.63012	2.53398	3.43579	2.82916	1.30365	1.01343	0	1.14056	2.00267	1.53379	2.10781	1.65478	1.87498	1.70679	2.08693	1.8025	0.8561	1.90498	3.49398	3.04977	4.76157	3.21312	1.80312	1.52089	1.47277	1.5549	0	2.1573	0	1.46929	1.08397	1.07182	1.56872	1.09519	0.864909	2.33634	2.52737	0.942854	0	0.589494	3.0957	2.21991	0	2.35741	2.59115	0	0	0
mir-152-GTCAGTGCATGACAGAACTTG	0	0	0	0	0	0	0	0	0	0	0	1.38098	0	0	0	0	0	0	0	0	0	0	0	1.93668	1.45476	2.36923	4.40554	1.79944	1.94156	0	1.86109	2.0647	3.21545	1.56872	1.87096	4.03624	4.53524	3.71672	0.942854	0.990529	1.17899	3.75906	2.39067	2.56439	4.71483	0	0	3.31351	0
mir-192-TGGCTGCCAATTCCATAGGTC	0	0	0	0	0	0	0	0	0	0	0	0	0	0	0	0	0	0	0	0	0	0	0	1.20208	1.19026	1.921	0	0	0	0	1.32235	1.80662	1.66727	2.3118	2.14476	1.15321	0	1.33802	0.942854	1.27353	1.17899	0	0	0	0	0	0	0	0
mir-200a-CATCTTACCGGACAGTGCTGG	0.732532	0	0	0	0	0	0	0	0	0	0	0	0	0	0	0	0	0	0	0	0	0	0	130.625	150.701	158.995	0	0	0	0	78.8025	76.8068	84.0782	82.7293	58.0909	60.1112	65.4175	56.1968	0.942854	0.566017	0	22.1121	15.1979	21.1562	20.5737	2.59115	0	0	0
mir-200b-ATACTGCCTGGTAATGATGAC	0	0	0	0	0	0	0	0	0	0	0	0	0	0	0	0	0	0	0	0	0	0	0	106.05	109.107	120.319	0	0	0	0	74.6884	65.3995	70.3826	63.5746	52.9801	40.3623	42.3289	37.1672	0.942854	0.566017	0.589494	11.9405	11.7826	10.4712	15.0017	0	0	0	0
mir-200b-CATCTTACTGGGCAGCATTGG	0.732532	0	0	0	0	0	0	0	0	0	0	0	0	0	0	0	0	0	0	0	0	0	0	173.166	190.178	195.558	0	0	0	0	93.9848	96.6283	92.8908	89.5824	67.8566	79.8599	91.6669	72.699	0.942854	0.778271	0	27.4189	23.9067	33.1233	33.218	4.14584	0	0	0.975412
mir-212-TAACAGTCTCCAGTCACGGCC	193.754	250.89	212.251	327.841	311.473	175.496	19.3565	20.5751	263.041	260.213	283.138	193.337	141.909	141.289	167.791	222.872	137.64	219.961	328.553	359.03	189.164	154.429	146.121	7.88032	5.35619	6.97963	4.92383	3.14901	3.6674	4.00596	5.14248	6.7619	5.95454	6.35746	4.92838	3.02719	3.84808	3.12205	0.942854	0.707521	0.663185	2.43233	1.3661	0	2.78603	2.59115	0	0	1.20051
mir-222-TCAGTAGCCAGTGTAGATCCT	6.95905	8.2988	8.08459	8.64488	7.78018	4.59381	0.912084	0.808629	5.84537	5.34045	6.59533	13.8825	11.1809	8.58864	5.05473	6.38353	4.61442	5.82151	12.1022	13.4093	6.09954	4.05616	4.08015	1.00173	0	0	0	0	0	0	0	0.774263	0	0	0	3.45964	3.71066	3.71672	0.942854	0.919775	0.66318	2.65345	2.04915	4.27396	0	0	0	0	0
mir-23b-GGGTTCCTGGCATGCTGATTT	0.854618	0	0	0	1.94505	1.30365	0	0	1.56826	1.46862	1.84055	2.32587	1.65478	1.8145	0.853391	0	0.937297	1.19855	0	1.69978	2.03318	1.88111	1.83607	2.00346	1.71927	1.60084	0	2.69915	2.58875	0	1.12645	0.929122	1.66727	1.89898	0	2.59473	2.6112	2.67604	0.942854	1.13203	0.810552	4.42242	4.26906	5.12876	3.64327	0	0	0	0
mir-28a-CAAGGAGCTCACAGTCTATTG	0	0	0	0	0	0	1.62149	1.16802	0	0	0	1.38098	0	0	0.656455	1.22761	0	0	0	0	0	0	0	1.93668	2.18215	1.5368	0	0	0	0	1.0285	0.774263	1.42909	1.32103	1.18646	1.87397	1.92404	0	0.942854	0	0	0	1.70763	0	0	0	0	0	0
mir-3068-CAGTAGCTGGGTGAATTGCAG	0.732532	1.18554	0	0	0	0	0	0	1.28313	0	0	0	0	0	0	0	0	0	0	0	0	0	0	0	1.05801	1.1526	0	0	0	0	0	0	0	0	0	1.72982	0	1.93269	0.942854	0.91977	0.884244	0	0	0	0	0	0	0	1.12548
mir-31-TATGCCAACATATTGCCATCT	0.732532	0	0	0	0	0	0	0	0	0	0	0	0	0	0	0	0	0	0	0	0	0	0	0	0	0	0	0	1.29437	0	1.66519	0.980735	1.54819	1.98154	2.19039	0	0	0	0.942854	0.778271	1.32637	0	0	0	0	0	0	0	0
mir-331-CTAGGTATGGTCCCAGGGATC	3.29639	4.89036	3.25797	3.32496	2.91756	1.80028	0.810747	0.808629	1.85341	2.13617	3.06759	3.48879	3.22012	2.5403	4.52956	5.03317	3.10031	1.71221	3.69789	3.87169	2.58057	5.76092	3.62113	0.93495	0.727382	1.1526	2.33235	1.79944	0	0	1.46928	1.29044	1.90545	1.48616	0.867026	1.29737	0	1.48669	0.942854	0.778271	0.589494	0	1.70763	1.92329	0	0	0	2.03907	0.750317
mir-351-CCCTGAGGAGCCCTTTGAGCC	0.854618	1.03736	0.844662	0	0	0	0	0	0.997985	0	0	0	1.02865	0	1.70679	1.04346	1.44201	0	0	1.41647	0.860191	0	0	0.734603	0.727382	1.02454	2.59149	2.69915	1.5101	2.8614	0.636689	0	0	0	0	6.77512	7.42131	4.7574	0.942854	1.06128	0.884244	8.18148	8.19661	7.47945	11.1441	2.59115	0	0	0.975412
mir-3535-TAGATAGTCAAGTTCTGATCC	0	0	0.965322	0	0	0	0	0	0	0	0	0	0	0	0	0	0	0	0	0	0	0	0	0	0	0.960496	0	0	0	0	0	0	1.19091	0	0	1.58566	2.19891	1.33802	0.942854	0.636767	0	0	0	0	0	0	0	0	0.525222
mir-3535-TCCTCTAGATAGTCAAGTTCT	0	0	0.965322	0	0	0	0	0	0	0	0	0	0	0	0	0	0	0	0	0	0	0	0	0	0	0	0	0	0	5.7228	0	0	0	0	0	1.00907	2.19892	1.63536	0.942854	0	0	0	0	0	0	0	0	0	0
mir-449a-TGGCAGTGTATTGTTAGCTGG	5.00562	10.3735	13.8765	138.207	182.126	97.0291	16.4176	8.53549	9.26701	6.67556	6.13517	14.3186	6.75329	7.6209	8.40267	22.4037	12.4013	72.7119	133.909	122.478	47.3887	9.7583	35.4972	1.8699	0.99189	1.40874	2.85064	8.09743	4.53031	5.72282	4.84863	6.55544	4.64455	3.63283	3.33122	5.62191	3.4358	4.46007	0.942854	2.83007	2.57904	338.315	294.223	309.009	362.826	2.33203	0	0	2.62611
mir-5101-TTTGTTTGTTTTGCTGATGCA	0	0	0	0	0	0	1.01343	0	0	0	0	0	0	0	0	0	0	0	0	0	0	0	0	0.868165	0	0	0	0	0	0	0	0.825883	0	0	0	2.45057	4.53524	3.56805	0.942854	0	0	0	1.53687	0	2.14311	0	0	0	0
mir-574-ACGCTCATGCACACACCCACA	0	0	0	0	0	0	0	0	0	0	0	0	0	0	0	0	0	0	0	0	0	0	0	1.40242	0.727382	1.08856	0	0	1.5101	0	0	0.67103	0	0	0	0	1.37432	0	0.942854	0	0.736871	1.99009	0	0	0	0	0	0	0
mir-652-CAACCCTAGGAGGGGGTGCCA	2.31968	3.55663	3.01664	7.3149	7.86857	3.72471	2.63492	1.88679	2.56625	2.93724	2.60745	2.90732	2.23619	2.11692	3.67617	4.05108	3.96552	6.67761	10.1972	9.72648	5.94313	6.2312	4.99818	4.54118	5.55457	4.9946	1.5549	1.79944	1.94156	0	3.03652	2.83897	3.93	1.98155	2.23602	4.03624	5.63469	4.46007	0.942854	0.495262	0.736871	2.87457	3.24449	2.35069	2.78603	0	0	0	0.975412
mir-6911-TCAATCACACTCTGTCCACAG	0	0	1.80998	1.32998	1.94505	1.11742	1.62149	0.718782	1.28313	0	1.53379	1.59903	1.52062	1.14918	0.984686	1.5345	0.8652	1.36976	2.57732	2.26637	1.17298	1.64597	1.68306	0	0	0.960496	0	0	0	0	0	0	0	0	0	1.00907	1.23688	1.04068	0.942854	0.495262	0	0	0	0	0	0	0	0	0
mir-6988-TGACCTCTGTATCTCCTGCCA	1.22088	1.33374	1.32732	0	2.21027	1.24158	0.810747	0	1.56826	0	1.53379	1.81708	1.38644	1.0887	1.50985	2.27106	1.6583	0.799031	2.12909	1.88864	1.40759	1.1757	1.37705	0	0	0	0	0	0	0	0	0	0	0	0	1.00907	1.23688	1.04068	0.942854	0.566017	0.66318	1.76897	0	0	0	0	0	0	0.525222
mir-802-GGAGAGTCTTTGTCACTCAGT	0	0	0	0	0	0	0	0	0	0	0	0	0	0	0	0	0	0	0	0	0	0	0	0	0	0	0	0	0	0	0	0	0	0.908209	0.638864	0	0	0	0.942854	0	0	0	0	0	0	0	0	0	0
mir-875-TATACCTCAGTTTTATCAGGT	0	0	0	0	0	0	0	0	0	0	0	0	0	0	0	0	0	0	0	0	0	0	0	3.53945	1.98377	5.5709	0	0	0	0	0	0	0	0	0	0	0	0	0.942854	0	0	0	0	0	0	0	0	0	0
mir-10a-AAATTCGTATCTAGGGGAATA	0	0	0	0	0	0	0	0	0	0	0	0	0	0	0	0	0	0	0	0	0	0	0	0.801388	0	0	0	0	0	0	1.56724	2.99383	3.69182	0.825641	1.23209	6.63096	9.34534	5.94675	0.838092	0	0.589494	0	3.07373	2.56439	0	0	0	0	0
mir-10a-ACAAATTCGTATCTAGGGGAA	0	0	0	0	0	0	0	0	0	0	0	0	0	0	0	0	0	0	0	0	0	0	0	1.46921	1.45476	1.5368	0	0	0	0	2.59573	4.54236	3.81091	1.98154	2.19039	14.5592	12.7811	9.96083	0.838092	0	0.589494	4.42242	3.58601	3.84657	4.5005	0	0	0	0
mir-12191-CCCATGGAGCTGTAGGAGCCG	0	0	0	0	0	0	0	0	0	0	0	0	0	0	0	0	0	0	0	0	0	0	0	0	0	0	0	0	0	0	0	0	0	0	0	0	0	0	0.838092	0	0	0	0	0	0	0	0	0	0.525222
mir-130b-AGTGCAATGATGAAAGGGCAT	1.34298	1.33374	0.965322	3.76829	3.53644	1.30365	0	0	2.70882	2.4032	1.84056	1.45366	0.98392	1.02822	1.05033	1.78003	1.9467	2.62538	4.37024	3.5884	3.51896	3.82103	3.11111	12.8221	11.1753	11.654	0	0	0	0	10.285	12.3882	10.8372	10.238	7.48379	0	0	1.18935	0.838092	0.636767	0	0	2.04915	0	0	0	0	2.03907	3.97668
mir-16-CCAATATTATTGTGCTGCTTT	0	0	0	0	0	0	0	0	0	0	0	0	0	0	0	0	0	0	0	0	0	0	0	1.8699	1.58702	2.04907	0	0	1.72584	2.8614	1.76314	2.63251	1.78636	2.14667	2.19039	0	1.23688	0	0.838092	0.566017	1.25268	1.76897	1.87839	2.99179	2.14311	0	0	0	3.37643
mir-1843a-AATATGGAGGTCTCTGTCTGA	0	0	0	1.77331	1.59139	0.931176	0.810747	0	1.14056	1.46862	0	0	0	1.02822	0	1.47312	0.793104	0.970251	0	2.26637	0.860191	0	1.17304	0	0	0	0	0	0	0	0	0	0	0	0	0	0	0	0.838092	0	0	0	0	0	0	0	0	0	0
mir-188-ATCCCTTGCATGGTGGAGGGT	1.0988	0	1.68932	2.21663	2.29868	0	0.810747	1.43756	0	1.33512	0	1.38098	1.29699	1.33064	1.37856	2.57796	1.0094	0.741955	1.90498	2.45523	1.95497	1.88111	1.02004	1.20208	1.52089	1.34469	0	0	0	0	1.07747	0.877502	0.952727	0.990771	0.912661	2.16228	3.0235	3.56805	0.838092	0	0	0	1.3661	0	0	0	0	0	0
mir-331-TCTAGGTATGGTCCCAGGGAT	3.05221	4.89037	3.98197	3.54662	3.44802	1.92444	3.547	3.50405	2.56625	1.86916	3.06759	4.21562	3.39901	3.56852	3.74181	6.26077	4.68652	2.34002	4.37024	3.68284	2.89336	4.93792	4.38616	0.801388	1.05801	1.40873	2.85066	0	3.23593	0	0.832591	0.877502	1.07182	1.40359	1.09519	1.58567	2.33634	1.93269	0.838092	1.13203	1.25268	2.65345	0	3.20549	2.35741	0	0	2.29397	0.975412
mir-3535-AATTCCTCTAGATAGTCAAGT	0.732532	1.03735	0	0	0	0	0	0.988323	0	0	0	1.23562	0	0	0	1.10484	0.721	0	1.56881	1.51091	0	0	0	0.93495	0	1.40874	0	2.24929	0	8.5842	0	0.774263	0	0	0.775763	0	2.74863	1.33802	0.838092	0.636767	0.663185	0	0	0	2.14311	0	0	2.03907	1.72573
mir-455-AGTCCACGGGCATATACACTT	0	0	0	0	0	0	0	0	0	0	0	0	0	0	0	0	0	0	0	0	0	0	0	0	0	0	0	0	0	0	0	0	0	0	0	0	0	0	0.838092	0	0	0	0	0	0	0	0	0	0
mir-503-GAGTATTGTTTCCACTGCCTG	0	0	0	0	0	0	0	0	0	0	0	0	0	0	0.722103	0	0	0	0	0	0	0	0	0	0	0	3.36894	4.04872	3.02021	5.7228	0	0	0	0.990771	0.730128	7.20757	7.55874	6.09542	0.838092	0	1.32637	6.63362	4.78136	8.54793	9.64395	2.59115	0	0	0.525222
mir-106b-ACCGCACTGTGGGTACTTGCT	0	0	0	0	1.59139	0	0	0	0	0	0	0	0	0	0.656455	0	0	0.8561	0	0	0	0	0	1.26886	1.38864	1.28067	0	0	1.94157	0	0.73464	1.23883	1.54819	1.07334	0.867032	1.15321	0	1.33802	0.733331	0.636767	0.589494	1.76897	1.53687	2.77809	0	0	0	0	2.02586
mir-126a-TTATTACTTTTGGTACGCGCT	0	0	0	0	0	0	0	0	0	0	0	0	0	0	0	0	0	0	0	0	0	0	0	0	0	0	4.14639	4.04872	2.58875	0	0	0.67103	0	0.74308	0	1.29736	1.23688	1.78403	0.733331	0	0.736866	7.07586	7.17204	9.18903	10.5012	0	0	0	0
mir-184-TGGACGGAGAACTGATAAGGG	1.22088	2.22289	1.44799	5.87407	5.48147	1.24157	0	0	7.12848	6.14151	5.9818	3.56148	2.86232	1.69354	2.75713	2.08693	1.87461	4.16637	9.86106	5.00488	1.79858	1.11692	1.27505	1.26886	0.727382	1.34469	0	2.69915	0	0	1.76314	2.11632	2.02454	2.06411	1.50589	0	1.37432	1.33802	0.733331	0.990525	1.47374	2.21121	0	0	0	4.14582	0	0	1.6507
mir-1955-AGTCCCAGGATGCACTGCAGC	0	0	0	0	0	0	0	0	0	0	0	0	0	0	0	0	0	0	0	0	0	0	0	0.93495	1.19026	0	0	0	0	0	0.979524	0	0.952727	1.07334	0	0	0	1.33802	0.733331	0.778271	0	0	1.3661	0	0	0	0	0	0.600254
mir-200c-AATACTGCCGGGTAATGATGG	0	0	0	0	0	0	0	0	0	0	0	0	0	0	0	0	0	0	0	0	0	0	0	145.385	157.115	158.163	0	2.2493	0	0	110.392	113.146	115.638	126.323	103.177	34.1639	31.4718	22.3003	0.733331	0.707521	0	60.8081	46.4476	66.033	74.5799	7.25519	0	3.82327	2.02586
mir-203-TTGTGAAATGTTTAGGACCAC	0	0	0	0	0	0	0	0	0	0	0	0	0	0	0	0	0	0	0	0	0	0	0	0	0	0.83243	0	0	0	0	2.20392	1.49691	2.02454	2.55949	1.77969	0	0	1.63536	0.733331	0.707521	0	0	0	0	0	0	0	0	0
mir-221-CCTGGCATACAATGTAGATTT	1.83133	3.70482	3.98196	2.77079	2.21027	1.48988	0.912084	0	4.98993	3.47129	5.21491	7.05028	4.96435	5.38303	2.03502	2.88486	1.8025	2.05465	4.14613	3.96613	1.40758	1.99869	1.58106	0	0	0	0	0	0	0	0	0	0	0	0	1.15321	1.09946	1.18935	0.733331	0	0	0	1.53687	2.35069	0	0	0	0	0
mir-223-GTGTCAGTTTGTCAAATACCC	0	0	0	0	0	0	0	0	0	0	0	0	0	0	0	0	0	0	0	0	0	0	0	0	0	0.896463	1.55489	1.79942	0	0	0	0.72265	0	0	0.684499	0	0	0	0.733331	0	0.663185	0	1.3661	0	2.14311	0	0	0	2.77617
mir-28c-AGGAGCTCACAGTCTATTGAA	0	0	0	0	0	0	0	0	0	0	0	0	0	0	0	0	0	0	0	0	0	0	0	0	0	0	0	0	0	0	0	0	0	0	0	0	0	0	0.733331	0	0	0	0	0	0	0	0	0	0
mir-3105-CTGCTTATGAGCTTGCACTCC	0	0	0	0	0	0	0	0	0	0	0	0	0	0	0	0	0	0	0	0	0	0	0	0	0	0	0	0	0	0	0	0	0	0	0	0	0	0	0.733331	0	0	0	0	0	0	0	0	0	0
mir-33-TGCATTGTAGTTGCATTGCAT	0	0	0	0	0	0	0	0	0	0	0	0	0	0	0	0	0	0	0	0	0	0	0	0	0	0	0	0	0	0	0	0	0	0	0	0	0	0	0.733331	0	0.663185	0	0	0	0	0	0	0	0.975412
mir-3535-AAGAAAATTCCTCTAGATAGT	0	0	0	0	0	0	0	0	0	0	0	0	0	0	0	0	0	0	0	0	0	0	0	0	0	0	0	0	0	0	0	0	0	0	0	0	1.09946	0	0.733331	0	0	0	0	0	0	0	0	0	0.675285
mir-3535-CTCTAGATAGTCAAGTTCTGA	0	0	0	0	1.59139	0.869103	0	0.808629	0.855418	1.20159	0	0	0	1.02822	0.656455	0	0	0	1.56881	0	0	0	0	0.868165	1.25638	0	1.5549	2.69915	0	8.58422	0	0	1.07182	0.990771	0	5.3336	7.69617	1.33802	0.733331	0	0.663185	0	0	0	0	0	0	0	1.12548
mir-423-CTCGGTCTGAGGCCCCTCAGT	0	0	0	0	0	0	0	0	0	0	0	0	0	0	0	0	0	0	0	0	0	0	0	0	0	1.02453	0	0	0	0	0.636689	0	0	0.825641	0	0	0	0.892013	0.733331	0.566017	0	0	0	0	0	0	0	0	0.975412
mir-450b-TTGGGAACATTTTGCATGCAT	0	0	0	0	0	0	0	0	0	0	0	0	0	0	0	0	0	0	0	0	0	0	0	0	0	0	1.5549	2.2493	1.29438	0	0	0	0	0	0	2.59472	2.06147	2.52737	0.733331	0	0	4.42242	2.56145	3.41917	6.64361	0	0	0	0
mir-669o-AGTTGTGTGTGCATGTTTATG	0.854618	2.96385	3.25797	1.77331	2.56392	1.17949	2.43223	2.60557	1.14056	1.2016	0	2.32587	1.69951	1.02822	2.82277	3.37591	2.30721	1.31269	2.12909	1.88864	2.65877	2.99804	2.8561	2.6045	2.97566	3.39376	2.59149	1.79944	0	0	1.71416	1.23883	1.66728	1.65129	0.958296	1.72982	1.78661	1.48669	0.733331	0	0	2.21121	1.70763	3.84657	0	0	0	2.03907	7.27808
mir-7065-TTGGTTTTCCTGTTTGCACAG	0	1.03735	1.08599	0	1.76823	0	0	0	0	0	0	1.52635	0	1.02822	0	1.2276	0.793104	0	0	0	0.860191	1.46962	0.969035	0	0	0	0	0	0	0	0	0	0	0	0	0	1.23688	0	0.733331	0.495262	0	0	0	0	0	0	0	0	0
mir-96-TTGGCACTAGCACATTTTTGC	0	0	0	0	0	0	0	0	0	0	0	0	0	0	0	0	0	0	0	0	0	0	0	9.61661	8.99313	11.0137	0	0	0	0	8.57079	6.4006	6.54999	6.77032	4.79147	2.88302	3.57323	2.3787	0.733331	0	0.736866	3.31682	1.87839	2.56439	3.85757	0	0	0	0
let-7c-GGTAGTAGGTTGTATGGTTTT	0	0	0	0	0	0	0	0	0	0	0	0	0	0	0	0	0	0	0	0	0	0	0	0	0	0	0	0	0	4.00596	0	0	0	0	0	0	0	0	0.628569	0	0	0	0	0	0	0	0	0	0
let-7f-TTAGGGTCATACCCCATCTTG	2.80803	5.92771	4.34396	5.65243	7.07287	3.72472	3.34432	2.69542	4.98993	4.53938	4.75476	6.46881	5.23268	5.68543	3.28229	4.78765	3.74922	3.08197	3.69789	6.42135	3.98816	5.34943	3.77414	0.734603	0.859633	1.08857	1.81404	0	0	0	0.73464	0.877502	0	0	0	1.87397	1.37431	1.18935	0.628569	0.566017	0	0	1.53687	0	0	0	0	0	0
mir-12182-TAATTAGGCTCTGGATCTGTG	0	0	0	0	0	0	0	0	0	0	0	0	0	0	0	0	0	0	0	0	0	0	0	0	0	0	0	0	0	0	0	0	0	0	0	0	0	0	0.628569	0	0	0	0	0	0	0	0	0	0
mir-122-CATCAAACGCCATTATCACAC	0	0	0	0	0	0	0	0	0	0	0	0	0	0	0	0	0	0	0	0	0	0	0	0	0	0	0	0	0	0	0	0	0	0	0	0	0	0	0.628569	0	0.736871	0	0	0	0	0	0	0	0
mir-148b-AAGTTCTGTTATACACTCAGG	0	0	0	0	1.50299	0	0	0	0	0	0	0	0	0	0	0	0	0	0	0	0	0	0	0	0	0	0	0	0	0	0.832591	0.929116	0	0	0	0	0	0	0.628569	0	0	0	0	0	0	0	0	0	0
mir-16-CTAGCAGCACGTAAATATTGG	0.732532	1.77832	0	0	0	0	1.11477	0.808629	1.14056	0	1.22704	0	0	0	0.656455	0	0	0	1.34469	0	1.09478	1.23449	1.32605	2.00346	1.19026	1.28066	2.59149	2.69915	1.29438	0	1.02849	1.29044	1.31	1.65128	1.36899	1.44152	3.98552	2.52737	0.628569	0.990525	1.54743	2.65345	2.56145	2.35069	3.21465	0	0	0	1.20051
mir-1843a-AGTCTGATCGTTCACCTCCAT	1.0988	0	0	2.54914	2.03345	1.36573	0	0	2.56625	1.60213	1.22704	1.30829	1.52061	1.27015	1.70679	1.71864	1.2257	1.19855	2.1291	1.69978	1.01659	2.64532	1.22404	0	0	0	0	0	0	0	0	0	0	0	0	1.15321	0	0	0.628569	0.707521	0	0	0	0	0	0	0	0	0
mir-18a-ACTGCCCTAAGTGCTCCTTCT	0	0	0	0	0	0	0	0	0	0	0	0	0	0	0.656455	0	0	0	0	0	0	1.23449	0	4.07371	3.90142	3.90603	0	0	1.5101	0	4.65272	5.47148	4.40637	6.10977	3.78755	1.72982	2.06147	1.78403	0.628569	0.849025	0.884244	2.21121	2.21991	1.70959	3.00034	0	0	0	4.80203
mir-190a-ATATGTTTGATATATTAGGTT	1.83132	2.22289	3.01664	5.31993	6.10035	2.79353	0	0.808629	1.71084	0	2.91421	2.47123	1.74423	2.35885	1.50985	3.37591	2.23511	4.28051	6.94756	5.76033	3.12796	5.17308	3.72314	0.734603	1.32252	1.02453	0	0	1.94156	0	0	0.72265	0	0.825641	0	13.2619	14.1554	10.7042	0.628569	0.636767	0.736871	0	0	1.92329	0	0	0	2.03907	0
mir-19a-TGCAAATCTATGCAAAACTGA	0	0	0	0	0	0	0	0	0	0	0	0	0	0	0	0	0	0	0	0	0	0	0	1.00173	0	0	0	0	0	0	0.930542	1.49691	1.31	1.07334	1.14083	0	0	0	0.628569	0.566017	0	0	0	0	0	0	0	0	1.57567
mir-214-GTACAGCAGGCACAGACAGGC	0	0	0	0	0	0	0	0	0	0	0	0	0	0	0	0	0	0	0	0	0	0	0	3.7398	3.10791	4.16217	4.14639	3.59886	4.09884	0	2.4488	2.52927	2.5009	3.63284	2.60108	4.03623	3.98551	3.41938	0.628569	0.566017	1.54743	4.86466	4.26906	5.12876	4.28619	0	0	0	1.20051
mir-219a-ATTGTCCAAACGCAATTCTCG	0	0	0	1.44082	0	0	0	0	0	0	0	0	0	0	0.984686	0	0	0	0	0	0	0	0	0	0	0	0	0	1.29437	0	0	0	0	0	0	0	0	1.18935	0.628569	0	0	0	0	0	0	0	0	0	0
mir-28a-CTAGATTGTGAGCTGCTGGAG	0	0	0	0	0	0	0	0	0	0	0	0	0	0	0	0	0	0	0	0	0	0	0	1.40243	1.98377	1.72889	0	0	0	0	0.979524	0.774263	0	0.825641	0.775763	1.15321	1.51174	0	0.628569	0	0	0	0	0	0	0	0	0	0
mir-3065-TCAACAAAATCACTGATGCTG	0	0	0	0	0	0	0	0	0	0	0	0	0	0	0	0	0	0	0	0	0	0	0	0	0	0	0	0	0	0	0	0	0	0.990771	0.684499	0	0	0	0.628569	4.52812	0.589494	0	0	0	0	0	0	0	0
mir-3068-TAGCTGGGTGAATTGCAGTAC	0	0	0	0	0	0	0	0	0	0	0	0	0	0	0	0	0	0	0	0	0	0	0	1.1353	1.19026	0	0	0	0	0	0	0	0.952727	1.07333	0	0	1.09945	0	0.628569	0	0.66318	0	0	0	0	0	0	0	0
mir-30e-CTGTAAACATCCTTGACTGGA	0	0	0.965322	0	0	0	0	0	0	0	1.38041	0	1.11809	0	0	1.22761	0	0	1.45675	0	0	0	0	0	0	0	2.33234	2.69915	3.23594	0	0	0	0	0	0	3.17133	1.92404	2.23003	0.628569	0	0	0	0	0	0	0	0	0	0
mir-32-TTGCACATTACTAAGTTGCAT	0	0	0	0	0	0	0	0	0	0	0	0	0	0	0	0	0	0	0	0	0	0	0	0	0	0	0	0	0	0	0	0	0	0	0	0	1.23688	0	0.628569	0	0	0	0	0	0	0	0	0	0
mir-335-AGAGCAATAACGAAAAATGTT	1.0988	4.59398	2.89598	2.32747	2.29868	1.17949	0	0	3.13653	2.53671	4.14124	0	1.43117	1.02822	2.69148	3.98971	1.8025	2.68246	2.9135	3.96613	1.64218	1.46962	1.83607	0	0	0	0	0	0	0	0	0	0	0	0	0	0	0	0.628569	0	0	0	0	0	0	0	0	0	0
mir-338-CAGCATCAGTGATTTTGTTGA	12.5751	10.8181	14.4799	22.4989	24.5783	15.2714	8.31019	7.3675	12.6887	12.016	13.9575	14.9001	12.1649	13.8507	16.1489	19.9485	21.0533	8.4469	17.8172	22.2858	33.7821	48.8504	34.5792	0	0	0	0	0	0	0	0	0	0	0	0	0	0	0	0.628569	0	0	2.43233	0	0	2.14311	0	0	2.80372	0
mir-3535-CAAGAAAATTCCTCTAGATAG	0	0	0	0	0	0	0	0	0	0	0	0	0	0	0	0	0	0	0	0	0	0	0	0	0	0	0	0	0	0	0	0	0	0	0	1.15321	0	0	0.628569	0	0	0	0	0	0	0	0	0	0
mir-361-CCCCAGGTGTGATTCTGATTT	2.31968	4.00121	2.65465	4.43327	4.86259	2.29691	1.41881	2.15634	1.14056	3.33778	3.37435	4.72442	3.39901	2.9032	2.69148	4.17385	2.30721	1.9405	4.4823	5.57147	3.12797	4.7028	3.46813	0	0	0	1.81405	2.24929	0	0	0	0.67103	0	0	0	0	1.23689	0	0.628569	0.566017	0.663185	0	2.39067	0	0	0	0	0	1.27554
mir-425-TCGGGAATGTCGTGTCCGCCC	1.0988	2.0747	1.80998	3.21412	2.29868	1.30365	0	0	0	0	0	1.88976	2.14674	2.11692	1.77244	1.78003	1.65831	1.25562	2.12909	1.60534	1.64218	2.17504	2.19308	0	0	0	0	0	1.29437	0	1.46928	1.44529	1.90545	0.990771	1.09519	1.29736	1.92404	1.63536	0.628569	0	0	0	0	0	0	0	0	0	0
mir-455-TGTGCCTTTGGACTACATCGT	0	0	0	0	0	0	0	0	0	0	0	0	0	0	0	0	0	0	0	0	0	0	0	0	0	0	0	0	0	0	0.73464	0.72265	0	0	0.684499	2.16228	1.51174	2.67604	0.628569	1.34429	0	0	0	0	0	0	0	0	0
mir-574-GAGTGTGTGTGTGTGAGTGTG	0	0	0	0	0	0	0	0	0	0	0	0	0	0	0	0	0	0	0	0	0	0	0	1.66955	2.11602	2.62536	1.5549	0	1.29438	0	0	0.980735	1.42909	0	0.730128	0	0	0	0.628569	0	0	2.87457	0	3.20549	2.35741	0	0	0	0.675285
mir-669f-CATATACATACACACACACGT	1.34297	3.26024	3.61997	1.88413	2.29868	1.1795	1.31745	1.25786	0.855418	0	1.53379	2.25318	1.8784	1.69354	3.61052	6.01525	2.73981	1.88343	3.69791	1.88864	2.18958	2.64533	1.63206	0.868165	1.85152	1.02453	0	0	1.5101	0	0	0.774263	0	1.07334	0.867026	0	0	0	0.628569	0	0	0	0	0	0	0	0	0	1.95082
mir-6936-CGGCGCGCGCGGTCGCTCACC	0.732532	2.0747	0.965322	1.77331	1.59139	0.931176	0	0	0.855418	0	0	1.59903	1.20754	1.57257	1.05033	1.47312	1.1536	0.913175	1.79291	1.88863	0	1.35205	1.07104	0	0	0	0	0	0	0	0	0	0	0	0	1.00907	0	0	0.628569	0	0	0	0	0	0	0	0	0	0
mir-741-TGAGAGATGCCATTCTATGTA	0	0	0	0	0	0	0	0	0	0	0	0	0	0	0	0	0	0	0	0	0	0	0	0	0	0	0	0	0	0	0	0	0	0	0	0	0	0	0.628569	1.34429	7.14764	0	0	0	0	0	0	0	0
let-7a-CTGTACAGCCTCCTAGCTTTC	1.95342	2.66747	3.37864	4.32245	3.35962	2.85561	2.1282	1.79694	3.56424	2.80373	2.91422	2.25318	1.61005	2.11692	2.36325	3.06901	3.24451	1.48392	2.57732	3.30511	4.84835	7.23055	4.84518	0	0	0	1.5549	0	1.29438	0	0	0	0	0	0	0	0	0	0	0	0	0	0	0	0	0	0	0	0
let-7a-TAGAGTTACATCAAGGGAGAT	0	0	0	0	0	0	0	0	0	0	0	0	0	0	0	0	0	0	0	0	0	0	0	0	0	0	0	0	0	0	0	0	0	0	0	0	0	0	0	0	0	0	0	0	0	0	0	0	0
let-7a-TAGGGTCACACCCACCACTGG	0	0	0	0	0	0	0	0	0	0	0	0	0	0	0	0	0	0	0	0	0	0	0	0	0	0	0	0	0	0	0	0	0	0	0	0	0	0	0	0	0	0	0	0	0	0	0	0	0
let-7a-TATACAATCTACTGTCTTTCC	0.732532	0	0	0	0	0	0	0	0.855418	0	0	0	0	0	0	0	0	0	0	0	0	0	0	0	0	0	1.55489	0	0	0	0	0	0	0	0	0.864909	1.09945	1.11502	0	0	0	0	0	0	0	0	0	0	0
let-7a-TTAGGGTCACACCCACCACTG	2.31968	2.66748	4.58529	4.43328	5.74672	1.92443	3.74969	3.14465	2.99396	4.13884	3.83449	3.99758	4.29348	4.29432	2.49455	3.43728	2.66771	3.0249	5.37877	3.87171	3.04977	4.11495	2.39709	0.801388	0	0	0	0	0	0	0.636689	0	0	0	0	0.864909	0	1.04068	0	0	0	1.76897	0	0	0	0	0	0	0
let-7b-CAGGGCAGTGATGTTGCCCCT	0	0	0	0	0	0	0	0	0	0	0	0	0	0	0	0	0	0	0	0	0	0	0	0	0	0	0	0	0	0	0	0	0	0	0	0	0	0	0	0	0	0	0	0	0	0	0	0	0
let-7b-GTGAGGTAGTAGGTTGTGTGG	0	0	0	0	0	0	0	0	0	0	0	1.23561	0	0	0	0	0	0	0	0	0	0	0	0	0	0	0	1.79944	0	0	0	0	0	0	0	0	0	0	0	0	0	0	0	0	0	0	0	0	0
let-7b-TCAGGGCAGTGATGTTGCCCC	1.34297	1.33374	2.29265	2.21664	2.3871	0.807022	2.73626	2.06649	2.28111	2.00266	2.76083	5.08783	3.26484	3.99191	0.656455	1.65727	1.1536	0.741955	1.34469	2.26637	1.17299	1.35205	1.12204	0	0.793511	0	0	0	0	0	1.17543	0	0.952727	0.908209	0	1.00907	0	1.18935	0	0.566017	0	0	0	1.70959	0	0	0	0	0
let-7c-AACTGTACAACCTTCTAGCTT	0	0	0	0	0	0	0	0	0	0	0	0	0	0	0	0	0	0	0	0	0	0	0	0	0	0	0	1.79944	0	0	0	0	0	0	0	0	0	0	0	0	0	0	0	0	0	0	0	0	0
let-7c-CTGTACAACCTTCTAGCTTTC	2.93013	3.85301	4.94729	2.54913	2.91756	2.48314	1.62149	2.24618	3.99195	2.93725	3.52773	7.48638	5.85882	4.77819	2.69148	2.02555	2.73981	1.99757	2.3532	3.68283	2.26777	3.82103	2.7541	0	0	0	6.99704	4.49857	4.74605	4.00596	0	0	0	0	0	2.30642	2.74863	1.78403	0	0.566017	0.736871	1.76897	1.70763	0	0	2.33203	0	0	0
let-7c-GGTAGTAGGTTGTATGGTTTA	0	0	0	0	0	0	0	0	0	0	0	0	0	0	0	0	0	0	0	0	0	0	0	0	0	0	0	0	0	0	0	0	0	0	0	0	0	0	0	0	0	0	0	0	0	0	0	0	0
let-7c-GTGAGGTAGTAGGTTGTATGG	0.854618	0	1.44799	0	0	0	1.01343	1.25786	0.855418	1.46862	1.07366	1.67171	1.02865	1.75402	0.919039	0	0.721	0	0	0	0	0	0	0	0	1.1526	1.5549	0	0	0	0	0	0	0	0	1.15321	1.09946	1.18935	0	0	0	0	0	0	0	0	0	0	0
let-7c-GTTGAGGTAGTAGGTTGTATG	0	1.03735	0	0	0	0	0	0	0	1.33511	1.07366	3.05269	1.96785	2.29837	1.31292	1.35037	0.793104	0	0	1.41647	0.860191	0	0	0	0	0	0	0	0	0	0	0	0	0	0	0	0	0	0	0	0	0	0	0	0	0	0	0	0
let-7c-TAGAGTTACACCCTGGGAGTT	1.70924	2.66748	0	1.44082	1.67981	0.993256	0	0	1.42569	1.60213	2.45407	4.43368	3.7568	3.2661	1.11598	1.41174	0.937304	1.0844	0	1.88864	0.860191	1.70476	1.07104	0	0	0	0	0	0	0	0	0	0	0	0	0	0	0	0	0	0	0	0	0	0	0	0	0	0
let-7c-TATACAATCTACTGTCTTTCC	0.732532	0	0	0	0	0	0	0	0.855418	0	0	0	0	0	0	0	0	0	0	0	0	0	0	0	0	0	1.55489	0	0	0	0	0	0	0	0	0.864909	1.09945	1.11502	0	0	0	0	0	0	0	0	0	0	0
let-7c-TGTACAACCTTCTAGCTTTCC	0.854618	0	0	0	0	0	0	0	0	0	0	0	0	0	0	0	0	0	0	0	0	0	0	0	0	0	1.5549	0	0	0	0	0	0	0	0	0	0	0	0	0	0	0	0	0	0	0	0	0	0
let-7c-TTGGGCTCTGCCCCGCTCTGC	0	0	0.965322	1.88414	1.32617	0	0	0.718782	1.14056	0	1.84056	1.67171	1.52061	1.0887	0	0	0	0	0	0	0	1.1757	0	0	0	0	0	0	0	0	0	0	0	0	0	0	0	0	0	0	0	0	0	0	0	0	0	0	0
let-7d-TTAGGGCAGAGATTTTGCCCA	0	0	0	0	0	0	0	0	0	0	0	0	0	0	0	0	0	0	0	0	0	0	0	0	0	0	0	0	0	0	0	0	0	0	0	0	0	0	0	0	0	0	0	0	0	0	0	0	0
let-7e-AGGAAGACACCCGAGGAGATC	0	0	0	0	0	0	0	0	0	0	0	0	0	0	0	0	0	0	0	0	0	0	0	0	0	0	0	0	0	0	0	0	0	0	0	0	0	0	0	0	0	0	0	0	0	0	0	0	0
let-7e-AGGTAGGAGGTTGTATAGTTG	1.83132	3.55663	3.13731	2.65997	2.82916	1.61404	1.21612	1.34771	2.8514	2.13617	3.0676	4.36101	2.32563	2.54031	2.03502	3.49867	2.2351	1.54099	3.36172	3.96613	1.64218	2.88046	2.04007	0	0	0	0	0	0	0	0	0	0	0	0	1.00907	0	0	0	0	0	2.65345	2.04915	0	0	0	0	0	0
let-7e-CTGAGGTAGGAGGTTGTATAG	0	0	0	0	0	0	0	0	0	0	0	0	0	0	0	0	0	0	0	0	0	0	0	0	0	0	0	0	0	0	0	0	0	0	0	0	0	0	0	0	0	0	0	0	0	0	0	0	0
let-7e-GAGGAAGACACCCGAGGAGAT	0	0	0	0	0	0	0	0	0	0	0	0	0	0	0	0	0	0	0	0	0	0	0	0	0	0	0	0	0	0	0	0	0	0	0	0	0	0	0	0	0	0	0	0	0	0	0	0	0
let-7e-TAGGAGGTTGTATAGTTGAGG	0	0	0	0	0	0	0	0	0	0	0	0	0	0	0	0	0	0	0	0	0	0	0	0	0	0	0	0	0	0	0	0	0	0	0	0	0	0	0	0	0	0	0	0	0	0	0	0	0
let-7e-TATACGGCCTCCTAGCTTTCC	0.976705	1.03735	1.56866	3.21412	2.56392	1.42781	1.4188	1.16802	2.28111	1.86916	1.99394	2.54392	1.56534	1.75402	1.50985	2.39382	1.8025	1.31269	2.3532	2.73852	1.17299	2.46897	1.78506	0	0	0	0	0	0	0	0	0	0	0	0	0	0	0	0	0	0	0	0	0	0	0	0	0	0
let-7f-GTGAGGTAGTAGATTGTATAG	0.854618	1.33373	1.44799	1.66247	1.32617	0.807022	1.31746	1.07817	1.14055	1.2016	0	1.45366	1.02865	1.14918	0.853391	1.65727	0.793104	0.799031	1.90498	1.98307	0.860191	1.1757	0	0	0	0.83243	1.5549	0	0	0	0	0	0	0	0	0	1.64919	2.82471	0	0.707521	0.810557	2.21121	1.70763	0	0	0	0	0	0
let-7f-GTGGGGTAGTGATTTTACCCT	0	0	0	0	0	0	0	0	0	0	0	0	0	0	0	0	0	0	0	0	0	0	0	0	0	0	0	0	0	0	0	0	0	0	0	0	0	0	0	0	0	0	0	0	0	0	0	0	0
let-7g-ACTGTACAGGCCACTGCCTTG	0	0	0	0	0	0	0	0	0	0	0	0	0	0	0	1.90278	0	0	0	0	0	1.52841	0	0	0	0	0	0	0	0	0	0	0	0	0	0	0	0	0	0	0	0	0	0	0	0	0	0	0
let-7g-GCTGAGGTAGTAGTTTGTACA	0	0	0	0	0	0	0	0	0	0	0	0	0	0	0	0	0	0	0	0	0	0	0	0	0	0	0	0	1.5101	0	0	0	0	0	0	0	0	0	0	0	0	0	0	0	0	0	0	0	0
let-7g-TGAGGGTCTATGATACCACCC	0	0	0	0	0	0	0	0	0	0	0	0	0	0	0	0	0	0	0	0	0	0	0	0	0	0	0	0	0	0	0	0	0	0	0	0	0	0	0	0	0	0	0	0	0	0	0	0	0
let-7i-AGGTAGTAGTTTGTGCTGTTG	0	0	0	0	1.94503	0.807022	0	0	0	0	0	0	0	0	0	0	0	0	0	0	0	0	0	0	0	0	0	0	0	0	0	0	0	0	0	0	0	0	0	0	0	0	1.53686	0	0	0	0	0	0
let-7i-CTGAGGTAGTAGTTTGTGCTG	0	1.03735	0	1.44082	0	0	0	0.718782	0	0	0	0	0	0	0	0	0	0.799031	1.34469	1.7942	0	0	0	0	0	0	0	2.69915	1.94156	0	0	0	0	0	0	0	0	0	0	0	0	0	1.3661	0	0	0	0	0	0
let-7i-GGTCGGGTTGTGACATTGCCC	0	0	0	0	0	0	0	0	0	0	0	0	0	0	0	0	0	0	0	0	0	0	0	0	0	0	0	0	0	0	0	0	0	0	0	0	0	0	0	0	0	0	0	0	0	0	0	0	0
mir-101a-AGTTATCACAGTGCTGATGCT	0	0	0	0	0	0	0	0	0	0	0	0	0	0	0	0	0	0	0	0	0	0	0	0	0	0	0	0	0	0	0	0	0	0	0	0	0	0	0	0	0	0	0	0	0	0	0	0	0
mir-101a-GGTACAGTACTGTGATAACTG	0	0	0	0	1.32617	0	0	1.07817	0	0	0	0	1.11809	1.39112	0	0	0	0	0	0	0	0	0	0	0	0	0	0	0	0	0	0	0	0	0	1.29737	1.23689	1.48669	0	0	0	0	0	0	0	0	0	0	0
mir-101a-TGTCCATTCTAAAGGTACAGT	0.732532	0	0.965322	0	0	0	0	0.898476	1.28313	0	0	0	0	0	0	1.22761	1.2257	0	0	0	0	0	0	0	0	0	0	0	0	0	0	0	0	0	0	0	0	0	0	0	0	0	0	0	0	0	0	0	0
mir-101b-AGGTACAGTACTGTGATAGCT	0	0	0	0	0	0	0	0	0	0	0	0	0	0	0	0	0	0	0	0	0	0	0	0	0	0	0	0	0	0	0	0	0	0	0	0	0	0	0	0.566017	0	0	0	0	0	0	0	0	0
mir-101b-CTGAGACTGAACTGCCCTTTT	0	0	0	0	0	0	0	0	0	0	0	0	0	0	0	0	0	0	0	0	0	0	0	0	0	0	0	0	0	0	0	0	0	0	0	0	0	0	0	0.495262	0	0	0	0	0	0	0	0	0
mir-101c-GCACAGTACTGTGATAACTGA	0	1.03735	0	1.55165	1.50299	0	1.52014	0	0.997985	1.06809	1.07366	0	1.02865	1.27015	0	1.10484	0.793104	0.913175	1.34469	2.0775	1.09479	1.82233	1.22404	0	0	0	0	0	0	0	0	0	0	0	0	1.29737	1.51174	1.93269	0	0	0	0	0	1.70959	0	0	0	0	0
mir-103-AAGCAGCATTGTACAGGGCTA	0	0	0	0	0	0	0	0	0	0	0	0	0	0	0	0	0	0	0	0	0	0	0	0	0	0	0	0	0	0	0	0	0	0	0	0	0	0	0	0	0	0	0	0	0	0	0	0	0
mir-103-AGCATTGTACAGGGCTATGAA	0	0	0	0	0	0	0	0	0	0	0	0	0	0	0	0	0	0	0	0	0	0	0	0	0	0	0	0	0	0	0	0	0	0	0	0	0	0	0	0	0	0	0	0	0	0	0	0	0
mir-103-GCTTCTTTACAGTGCTGCCTT	0	0	1.80999	0	0	0	0	0	0	0	0	0	0	0	1.57549	2.76211	0	0	2.9135	0	0	0	0	0	0	0	0	0	0	0	0	0	0	0.701796	0	0	0	0	0	0	0	0	0	0	0	0	0	0	0
mir-106a-AAAGTGCTAACAGTGCAGGTA	0	0	0	0	0	0	0	0	0	0	0	0	0	0	0	0	0	0	0	0	0	0	0	0	0	0	0	0	0	0	11.0686	10.3236	11.5518	2.88975	1.18646	4.4687	4.94754	4.7574	0	0	0	0	0	0	0	0	0	0	4.35184
mir-106a-AAGTGCTAACAGTGCAGGTAG	0	0	0	0	0	0	0	0	0	0	0	0	0	0	0	0	0	0	0	0	0	0	0	0	0	0	0	0	0	0	0.636689	1.29044	0	0	0	0	0	0	0	0	0	0	0	0	0	0	0	0	0
mir-106b-AAGTGCTGACAGTGCAGATAG	0	0	0	0	0	0	0	0	0	0	0	0	0	0	0	0	0	0	0	0	0	0	0	0	0	0	0	0	0	0	0	0	0	0	0	0	0	0	0	0	0	0	0	0	0	0	0	0	0
mir-106b-CGCACTGTGGGTACTTGCTGC	0	0	0	0	0	0	0	0	0	0	0	0	0	0	0	0	0	1.0844	0	0	0	0	0.918033	0	0	0	0	0	0	0	1.0285	0.929122	0	0.825641	0.867026	0	0	1.33802	0	0	0	0	0	0	0	0	0	0	0
mir-107-CAGCATTGTACAGGGCTATCA	0	0	0	0	0	0	0	0	0	0	0	0	0	0	0	0	0	0	0	0	0	0	0	0	0	0	0	0	0	0	0	0	0	0	0	0	0	0	0	0	0	0	0	0	0	0	0	0	0
mir-10a-AATTCGTATCTAGGGGAATAT	0	0	0	0	0	0	0	0	0	0	0	0	0	0	0	0	0	0	0	0	0	0	0	0	0	0	0	0	0	0	0.783615	1.755	2.14363	0.74308	0	4.18039	5.08497	2.3787	0	0	0	0	0	0	0	0	0	0	0
mir-10a-CACAAATTCGTATCTAGGGGA	0	0	0	0	0	0	0	0	0	0	0	0	0	0	0	0	0	0	0	0	0	0	0	0	0	0	0	0	0	0	0	0	0	0	0	2.45058	2.6112	0.892013	0	0	0	0	0	0	0	0	0	0	0
mir-10a-CCTGTAGATCCGAATTTGTGT	0	0	0	0	0	0	0	0	0	0	0	0	0	0	0	0	0	0	0	0	0	0	0	0	0	0	0	0	0	0	1.17543	1.80662	2.14363	0.74308	0.867026	7.06342	6.87158	7.43344	0	0	0	0	0	0	2.14311	0	0	0	0
mir-10a-TCACAAATTCGTATCTAGGGG	0	0	0	0	0	0	0	0	0	0	0	0	0	0	0	0	0	0	0	0	0	0	0	0	0	0	0	0	0	0	0	0	0.952727	0	0	1.58567	0	1.04068	0	0	0	0	0	0	0	0	0	0	0
mir-10b-ATACCCTGTAGAACCGAATTT	0	0	0	0	0	0	0	0	0	0	0	0	0	0	0	0	0	0	0	0	0	0	0	0	0	0	0	0	0	0	0	0	0	0	0	1.87397	1.09946	1.04068	0	0	0	0	0	0	0	0	0	0	0
mir-10b-CACAGATTCGATTCTAGGGGA	0	0	0	0	0	0	0	0	0	0	0	0	0	0	0	0	0	0	0	0	0	0	0	0	0	0	0	0	0	0	0	0	0	0	0	1.15321	1.37431	0	0	0	0	0	0	0	0	0	0	0	0
mir-10b-CCTGTAGAACCGAATTTGTGT	0	0	0	0	0	0	0	0	0	0	0	0	0	0	0	0	0	0	0	0	0	0	0	0	0	0	0	0	0	0	0	0	0	0	0	4.03624	3.29836	2.82471	0	0	0	0	0	0	0	0	0	0	0
mir-1188-TGGTGTGAGGTTGGGCCAGGA	1.83133	5.48314	5.18863	2.1058	3.00598	2.23483	0.912084	1.25786	1.42569	0	1.53379	2.6166	3.5779	2.29837	4.13569	8.10218	4.32602	2.7966	3.92201	3.96614	2.97156	4.87915	4.02915	0	0	0	0	0	0	0	0	0	0	0	0	0	0	0	0	0	0	0	0	0	0	0	0	0	0
mir-1192-TTTGCTCTTTTTGTTTGTTTG	0	0	0	0	0	0	0	0	0	0	0	0	0	0	0	0	0	0	0	0	0	0	0	0	0	0	0	0	0	0	0	0	0	0	0	1.00907	0	0	0	0.495262	0	0	0	0	0	0	0	0	0
mir-1194-TCTGCTGGAGACAATATAAGG	0	0	0	0	0	0	0	0	0	0	0	0	0	0	0	0	0	0	0	0	0	0	0	0	0	0	0	0	0	0	0	0	0	0	0	0	0	0	0	0	0	0	0	0	0	0	0	0	0
mir-1197-TAGGACACATGGTCTACTTCT	1.95342	3.70482	3.74064	3.98994	3.97849	2.29691	0	0	1.56827	1.33511	1.07366	2.03513	3.13067	2.41933	3.61052	5.34006	3.60502	2.7966	4.59436	3.87171	2.73697	4.05616	2.6521	0	0	0	0	0	0	0	0	0	0	0	0	0	0	0	0	0	0	0	0	0	0	0	0	0	0
mir-1198-AAGCTAGCCTCTAACTCATGG	0	0	0	2.32747	1.85663	0.869103	0	0	0	0	0	0	0	0	0	0	1.15361	0.741955	1.90498	1.51091	0	0	0	0	0	0	0	0	0	0	0	0	0	0	0	0	0	0	0	0	0	0	0	0	0	0	0	0	0
mir-1199-TCTGAGTCCCGGTCGCGCGGG	0	0	0	0	0	0	0	0	0	0	0	0	0	0	0	0	0	0	0	0	0	0	0	0	0	0	0	0	0	0	0	0	0	0	0	0	0	2.97338	0	0	0	0	1.53687	0	0	0	0	0	0
mir-12194-TCTGTGGGTCTGTTTGTCCGT	1.22088	1.77832	0.844662	0	1.41457	0.807022	0	0	0	0	0	0	1.29699	1.51208	1.18162	1.28898	0.937304	0.970251	1.90498	1.98307	1.56399	1.41084	0.969035	0	0	0	0	0	0	0	0	0	0	0	0	0	0	0	0	0	0	0	0	0	0	0	0	0	0
mir-122-AGTGTGACAATGGTGTTTGTG	0	0	0	0	0	0	0	0	0	0	0	0	0	0	0	0	0	0	0	0	0	0	0	0	0	0	0	0	0	0	0	0	0	0	0	0	0	0	0	0.566017	0	0	0	0	0	0	0	0	0
mir-12202-TCTTCTCTTTCCAGTCATCAG	0	0	0	0	0	0	0	0	0	0	0	0	0	0	0	0	0	0	0	0	0	0	0	0	0	0	0	0	0	0	0	0	0	0	0	0	0	0	0	0	0	0	0	0	0	0	0	0	0
mir-1224-CCCCACCTCTTCTCTCCTCAG	16.4819	10.3735	19.6685	5.98491	7.16129	6.02162	2.22955	2.42588	19.532	22.0294	26.9948	8.57664	5.94826	6.04834	13.7856	27.4983	17.232	2.85368	6.83551	8.21555	8.28908	17.5768	8.77227	0	0	0	0	0	0	0	0	0	0	0	0	0	0	0	0	0	0	0	0	0	0	0	0	0	0
mir-1224-TGAGGACTGGGGAGGTGGAGG	1.46506	1.18554	1.44799	0	0	0	0	0	1.56827	2.13618	1.38041	0	0	0	0	1.8414	0	0	0	0	0	1.35205	0	0	0	0	0	0	0	0	0	0	0	0	0	0	0	0	0	0	0	0	0	0	0	0	0	0	0
mir-1231-TGCCCTGTCTGTTCTGCCCAC	0	0	0	0	0	0	0	0	0	0	0	0	0	0	0	0	0	0	0	0	0	0	0	0	0	0	0	0	0	0	0	0	0	0	0	0	0	0	0	0	0	0	0	0	0	0	0	0	0
mir-124-AAGGCACGCGGTGAATGCCAA	645.238	742.743	588.365	1617.38	1475.58	799.261	947.458	830.278	852.706	950.867	1020.44	1128.7	828.554	890.497	442.781	618.956	482.568	796.459	1456.86	1506.09	743.674	886.595	607.634	0	0	0	0	0	0	0	0	0	0	0	0	0	0	0	0	0	0	0	0	0	0	0	0	0	0
mir-124-AGGCACGCGGTGAATGCCAAG	0	0	0	7.42573	5.83514	4.28341	4.15505	4.76191	0	0	0	0	0	0	0	0	0	3.42441	7.17169	6.98795	0	0	0	0	0	0	0	0	0	0	0	0	0	0	0	0	0	0	0	0	0	0	0	0	0	0	0	0	0
mir-124-ATTAAGGCACGCGGTGAATGC	2.1976	3.85301	0	4.32245	5.12783	2.35899	3.14163	2.24619	3.56423	3.87184	5.06151	4.65173	3.04121	3.26608	0	3.13038	0	0	3.92203	6.89353	2.81516	3.35075	0	0	0	0	0	0	0	0	0	0	0	0	0	0	0	0	0	0	0	0	0	0	0	0	0	0	0
mir-124-CAATTAAGGCACGCGGTGAAT	0	0	0	0	0	0	0	0	0	0	0	0	0	0	0	6.44491	2.9561	0	0	0	0	0	0	0	0	0	0	0	0	0	0	0	0	0	0	0	0	0	0	0	0	0	0	0	0	0	0	0	0
mir-124-CGTGTTCACAGCGGACCTTGA	111.833	131.447	109.444	192.848	216.253	111.121	118.166	111.86	165.381	173.03	193.411	238.546	146.739	164.092	88.6218	105.267	78.5174	122.48	199.798	222.387	102.675	161.659	100.473	0	0	0	0	0	0	0	0	0	0	0	0	0	0	0	0	0	0	0	0	0	0	0	0	0	0
mir-124-GTGTTCACAGCGGACCTTGAT	3.29639	4.0012	3.74064	5.87407	5.74673	3.53849	2.43222	2.15633	6.13048	5.07342	6.74869	7.12295	4.83019	5.68544	2.82276	0	2.66771	2.85367	5.93906	5.3826	0	4.76156	3.00912	0	0	0	0	0	0	0	0	0	0	0	0	0	0	0	0	0	0	0	0	0	0	0	0	0	0
mir-1247-CACCCGTCCCGTTCGTCCCCG	0.854618	0	0	0	0	0	0	0	0	0	0	0	0	0	0	0	0	0	0	0	0	0	0	0	0	0	0	0	0	0	0	0	0	0	0	0	1.37432	0	0	0	0	0	0	0	0	0	0	0	0
mir-1249-AACGCCCTTCCCCCCCTTCTT	0	0	0	0	0	0	0	0	0	0	0	0	0	0	1.11598	1.22761	0	0	0	0	0	1.35205	1.12204	0	0	0	0	0	0	0	0	0	0	0	0	0	0	0	0	0	0	0	0	0	0	0	0	0	0
mir-1249-AGGAGGGAGGGGATGGGCCAA	1.22088	2.0747	1.20666	0	0	1.05534	0	0	0	0	0	0	0	1.02822	1.64115	2.57797	2.45141	0.741955	0	0	2.50237	3.11561	2.34609	0	0	0	0	0	0	0	0	0	0	0	0	0	0	0	0	0	0	0	0	0	0	0	0	0	0
mir-1249-CGCCCTTCCCCCCCTTCTTCA	0	0	1.08599	0	0	0.744942	0	0.718782	0	0	0	0	0	0	1.11598	2.02554	1.2257	0	0	0	1.40758	3.05681	2.04007	0	0	0	0	0	0	0	0	0	0	0	0	0	0	0	0	0	0	0	0	0	0	0	0	0	0
mir-1251-ACTCTAGCTGCCAAAGGCGCT	1.0988	6.0759	2.77532	1.44082	1.32617	0	0	0	0	0	1.22704	0	0	0	4.85778	11.9691	4.18182	0.913175	2.01703	1.98307	1.72038	4.2913	1.47905	0	0	0	0	0	0	0	0	0	0	0	0	0	0	0	0	0	0	0	0	0	0	0	0	0	0
mir-1251-AGCGCTTTGCTCAGCCAGTGT	0	0	0	0	0	0	0	0	0	0	0	0	0	0	0	1.16622	0	0	0	0	0	0	0	0	0	0	0	0	0	0	0	0	0	0	0	0	0	0	0	0	0	0	0	0	0	0	0	0	0
mir-1251-CGCTTTGCTCAGCCAGTGTAG	0	0	0	0	0	0	0	0	0	0	0	0	0	0	0.722103	1.28898	0	0	0	0	0	1.1757	0	0	0	0	0	0	0	0	0	0	0	0	0	0	0	0	0	0	0	0	0	0	0	0	0	0	0
mir-125a-CAGGTGAGGTTCTTGGGAGCC	0	0	0	0	0	0	0	0	0	0	0	0	0	0	0	0	0	0	0	0	0	0	0	0	0	0	0	0	0	0	0	0	0	0	0	0	0	0	0	0	0	0	0	0	0	0	0	0	0
mir-125a-CTGAGACCCTTTAACCTGTGA	4.2731	8.00243	6.03328	6.31741	6.36559	3.97303	3.85103	2.60557	3.84938	4.53938	6.74869	7.05028	5.50103	6.59268	4.92344	7.42699	4.68652	5.07954	6.94756	9.06545	4.37915	7.87718	5.15118	1.06852	0.727382	1.60084	2.59149	0	0	0	0	0.877502	0	0	0	3.45964	3.98551	3.86539	0	0	0.810557	3.31682	2.56145	3.84657	2.35741	0	0	0	0
mir-125a-GTCCCTGAGACCCTTTAACCT	0.976705	1.33373	0	1.44082	1.41457	0.744942	1.21612	1.25786	0	0	1.22704	0	0	1.02822	1.05033	1.5345	1.00941	0	1.34469	0	0	0	0	0	0	0	0	0	0	0	0	0	0	0	0	0	1.09945	0	0	0	0	0	0	0	0	0	0	0	0
mir-125b-CAAGTCAGGTTCTTGGGACCT	1.95342	2.0747	1.68932	2.21664	2.12186	1.30365	1.62149	0.718782	1.71084	1.06809	1.68717	2.10781	2.59398	3.14513	1.64114	2.70073	1.2257	1.0844	1.45675	3.11625	1.25119	1.88112	1.83607	0	0	0	0	0	0	0	0	0	0	0	0	0	0	0	0	0	0	0	0	0	0	0	0	0	0
mir-125b-CACAAGTCAGGTTCTTGGGAC	1.22088	1.03735	0.965322	0	1.32617	0.869103	0.810747	0	0	0	0	1.59903	1.6995	1.4516	0.853398	1.16622	1.0815	0.913175	0	0	0	1.1757	0	0	0	0	2.33235	0	0	0	0	0	0	0	0	0	0	0	0	0	0	0	0	0	0	0	0	0	0
mir-125b-CACGGGTTAGGCTCTTGGGAG	1.70924	2.96386	2.89598	2.32747	3.09438	2.42106	1.62149	1.7071	1.42569	2.93724	3.06759	2.6166	3.04122	2.66127	3.8731	4.41937	4.18182	2.73953	4.70642	5.00489	3.44076	4.2913	3.72314	0	0.925762	0.83243	0	0	0	0	0	0	0	0	0	0	0	0	0	0	0	0	0	0	0	0	0	0	0
mir-125b-CCACGGGTTAGGCTCTTGGGA	0	0	0	0	0	0	0	0	0	0	0	0	0	0	0	0	0	0	0	0	0	0	0	0	0	0	0	0	0	0	0	0	0	0	0	0	0	0	0	0	0	0	0	0	0	0	0	0	0
mir-125b-CCTGAGACCCTAACTTGTGAT	0	1.03735	0.965322	0	0	0	0.912084	0	0	0	0	1.30829	0.98392	1.75402	0.722103	0	0	0	0	0	1.09478	0	0.918033	0	0	0	0	0	0	0	0	0	0	0	0	0	0	0	0	0	0	0	0	0	0	0	0	0	0
mir-125b-CGGGTTAGGCTCTTGGGAGCT	0	0	0.844662	0	0	0.869103	0	0	0	0	0	0	0	0	0	0	0.793104	0	0	0	0	0	0.918033	0	0	0	0	0	0	0	0	0	0	0	0	0	0	0	0	0	0	0	0	0	0	0	0	0	0
mir-125b-CTGAGACCCTAACTTGTGAGG	0	0	0	0	0	0	0	0	0	1.06809	0	1.23561	1.16282	1.02822	0	0	0	0	0	0	1.09478	0	0	0	0	0	0	1.79944	0	0	0	0	0	0	0	0	0	0	0	0	0	0	0	0	0	0	0	0	0
mir-125b-GTCCCTGAGACCCTAACTTGT	3.90683	4.2976	3.86131	5.31993	3.62485	2.04859	2.02686	1.88679	3.70681	2.40319	3.06759	5.30589	5.50103	4.41528	4.20133	5.2173	4.10971	3.25319	4.70641	5.09931	3.04977	5.76092	4.02915	0	0	0	0	0	0	0	0	0	0	0	0	0	0	0	0	0	0	0	0	0	0	0	0	0	0
mir-125b-TCCACGGGTTAGGCTCTTGGG	0.732532	1.03736	2.29265	2.1058	0	1.11742	0	0	0	1.33511	0	0	0	0	2.10067	3.37591	2.8119	1.0844	1.45675	2.17193	1.79858	2.76289	1.88707	0	0	0	0	0	0	0	0	0	0	0	0	0	0	0	0	0	0	0	0	0	0	0	0	0	0
mir-1264-AAATCTTATTTGAGCACCTGT	1.58715	3.70483	4.46463	3.65745	3.97848	1.61404	0	0	0	0	0	0	0	1.33064	3.151	3.49867	3.96552	3.93807	6.38727	4.81601	2.34598	1.82233	7.95628	0	0	0	0	0	0	0	0	0	0	0	0	0	0	0	0	0	0	0	0	0	0	0	0	0	0
mir-1264-ACAAATCTTATTTGAGCACCT	6.95905	15.1157	14.4799	14.5189	20.7765	7.51153	0.912092	0	0	0	0	0	4.96434	4.17335	13.9825	24.1224	17.232	14.7821	25.9974	24.7412	12.0427	9.34681	24.5319	0	0	0	0	0	0	0	0	0	0	0	0	0	0	0	0	0	0	3.53794	3.58602	2.35069	3.42896	0	0	0	0
mir-1264-AGGTCCTCAATAAGTATTTGT	15.139	28.4531	25.2191	30.368	36.8673	17.3199	1.4188	0	0	0	1.22704	3.77954	8.2739	6.83462	21.7287	34.066	23.9373	29.1075	50.3139	49.5766	18.846	11.6982	40.8524	0	0	0	0	0	0	0	0	0	0	0	0	0	0	0	0	0	0	5.74915	4.61059	3.84657	3.21467	0	0	0	0
mir-1264-CAAATCTTATTTGAGCACCTG	49.568	104.921	86.0342	110.832	112.812	59.2851	6.99267	0.898476	2.28111	3.20427	2.76083	13.5917	31.0831	27.6409	92.2975	128.408	107.646	107.755	174.025	167.239	81.1703	54.7875	188.299	0	0	0	0	0	0	0	0	0	0	0	0	0	0	0	0	0	0	26.3133	25.273	22.2246	18.2163	0	0	0	0
mir-1264-GGTCCTCAATAAGTATTTGTT	0	0	0	0	0	0	0	0	0	0	0	0	0	0	0.853398	0	0.721	0	2.01703	1.51091	0	0	1.37705	0	0	0	0	0	0	0	0	0	0	0	0	0	0	0	0	0	0	0	0	0	0	0	0	0	0
mir-126a-GTACCGTGAGTAATAATGCGC	0	0	0	0	0	0	0	0	0	0	0	0	0	0	0	0	0	0	0	0	0	0	0	0	0	0	0	0	0	0	0	0	0	0	0	0	0	0	0	0	0	0	1.70763	0	2.14311	0	0	0	0
mir-127-AAGCTCAGAGGGCTCTGATTC	5.73816	8.00241	10.7393	17.8439	18.8315	10.5534	1.31746	1.7071	7.27105	7.61013	6.28856	9.1581	7.28998	6.95559	7.8775	8.53184	7.06585	10.7869	17.1448	17.5643	8.91465	9.17046	8.26225	0	0	0	0	0	0	0	0	0	0	0	0	0	0	0	0	0	0	0	0	0	0	0	0	0	0
mir-127-CATCGGATCCGTCTGAGCTTG	75.9391	146.415	121.39	197.059	196.272	95.291	28.9841	22.7314	67.7205	71.0279	78.5303	116.366	105.101	103.426	120.394	160.755	123.075	132.468	229.046	219.932	109.636	121.979	99.3007	2.80485	1.25639	2.8815	0	0	0	0	0.930542	1.13559	1.42909	1.1559	1.18646	0.864909	0	0	0	0	0	0	0	0	0	3.62762	0	2.80374	0
mir-127-GCTGAAGCTCAGAGGGCTCTG	5.3719	8.5952	7.84326	5.65242	7.60335	4.65589	1.62149	1.7071	4.56223	3.87182	6.90208	5.6693	6.75329	5.56447	8.59957	12.5829	8.94044	5.25077	7.73197	8.49885	5.47394	7.64204	5.96722	0	0	0	0	0	0	0	0	0	0	0	0	0	0	0	0	0	0	0	0	0	0	0	0	0	0
mir-127-GGATCCGTCTGAGCTTGGCTG	3.54057	4.00121	3.74063	3.98996	3.89009	1.67612	0	0	3.2791	2.4032	3.68111	1.81708	2.28092	2.05644	2.56019	3.56005	2.16301	3.0249	5.15465	4.15499	2.89337	3.1156	3.06011	0	0	0	0	0	0	0	0	0	0	0	0	0	0	0	0	0	0	0	0	0	0	0	0	0	0
mir-127-TCATCGGATCCGTCTGAGCTT	0.732532	0	0	0	0	0	0	0	0	0	0	0	0	0	0.78775	1.47312	0.721	0	0	0	0	0	0	0	0	0	0	0	0	0	0	0	0	0	0	0	0	0	0	0	0	0	0	0	0	0	0	0	0
mir-127-TGCTGAAGCTCAGAGGGCTCT	10.2554	19.2652	12.0666	18.3981	20.5114	11.5466	4.05371	4.04313	11.6907	13.3511	13.6507	13.3737	13.8196	11.0684	16.871	25.5955	18.4576	15.2387	22.7477	25.2134	13.2156	16.1659	14.2805	0	0	0	0	0	0	0	0	0	0	0	0	0	0	0	0	0	0	0	0	0	0	0	0	0	0
mir-128-ACAGTGAACCGGTCTCTTTTT	1.22089	2.51928	1.80998	2.32747	2.74074	1.24157	0.912084	0.898476	2.85139	5.07342	2.91421	2.76197	2.54926	1.4516	0	0	0	1.19855	2.12909	1.98307	0	2.29262	1.07104	0	0	0	0	0	0	0	0	0	0	0	0	0	0	0	0	0	0	0	0	0	0	0	0	0	0
mir-128-CACAGTGAACCGGTCTCTTTC	33.4522	36.3072	27.5117	36.242	39.5197	23.2795	11.0464	9.0746	42.6282	50.7342	50.6152	32.0534	27.4157	24.3748	20.941	19.0279	11.7523	24.7128	42.4698	47.8769	20.3318	28.0992	19.8906	0	0	0	0	0	0	0	0	0	0	0	0	0	0	0	0	0	0	0	0	0	0	0	0	0	0
mir-128-CGGGGCCGTAGCACTGTCTGA	19.0458	18.0795	13.5145	20.0606	18.2126	11.7329	1.31745	0.718782	36.2126	41.789	38.0382	20.2787	13.9539	14.516	7.28668	6.26077	4.25392	15.2957	23.0838	28.3295	7.97631	7.17176	7.49727	0	0	0	0	0	0	0	0	0	0	0	0	0	0	0	0	0	0	0	0	0	0	0	0	0	0
mir-128-CTCACAGTGAACCGGTCTCTT	14.7727	21.0434	15.3246	19.2848	23.429	10.8638	2.43223	2.60557	17.6786	20.8278	20.5529	18.0981	16.5925	14.395	10.3721	11.3554	5.55172	13.983	22.8598	28.3296	12.2773	12.58	9.69035	0	0	0	0	0	0	0	0	0	0	0	0	0	0	0	0	0	0	0	0	0	0	0	0	0	0
mir-128-GGGGGCCGATGCACTGTAAGA	5.49398	6.2241	4.10263	3.76829	7.24971	3.84888	1.52014	1.52741	9.26701	7.47661	9.96968	6.5415	5.27741	5.32253	3.74182	2.88487	1.3699	3.93807	7.39579	7.83784	2.89337	3.29196	2.95811	0	0	0	0	0	0	0	0	0	0	0	0	0	0	0	0	0	0	0	0	0	0	0	0	0	0
mir-128-GGGGGGCCGATGCACTGTAAG	1.58715	1.63012	0	0	1.67981	0	0	0	1.56826	1.06809	1.84056	0	0	0	0.656455	0	0	0	0	0	0	0	0	0	0	0	0	0	0	0	0	0	0	0	0	0	0	0	0	0	0	0	0	0	0	0	0	0	0
mir-129-AGCCCTTACCCCAAAAAGCAT	41.6322	65.7977	41.7502	79.0232	96.0143	56.7398	19.7619	18.3288	41.9155	51.1347	48.6213	44.2642	31.754	33.8102	58.6873	77.1548	56.8871	64.8356	116.988	120.212	57.0854	70.5419	58.193	0	0	0	0	0	0	0	0	0	0	0	0	1.00907	0	0	0	0	0	0	0	0	0	0	0	0	0
mir-129-AGCCCTTACCCCAAAAAGTAT	3.66265	2.22289	1.44799	10.0857	12.5544	7.01487	5.1685	5.48069	8.12646	8.94525	8.2825	3.99758	1.6995	2.78224	1.83808	3.25315	2.52351	5.65029	10.8696	11.0485	2.89336	4.99672	4.59017	0	0	0	0	0	0	0	0	0	0	0	0	0	0	0	0	0	0	0	0	0	0	0	0	0	0
mir-129-GAAGCCCTTACCCCAAAAAGC	1.46506	2.81566	1.20666	3.54662	4.0669	3.41432	0	0	1.56827	2.26969	1.38041	1.45366	1.16282	1.20967	2.16631	2.7621	2.66771	2.28294	3.92201	5.09931	1.87678	2.88046	1.68306	0	0	0	0	0	0	0	0	0	0	0	0	0	0	0	0	0	0	0	0	0	0	0	0	0	0
mir-129-GAAGCCCTTACCCCAAAAAGT	8.42408	5.92771	3.61997	25.0479	29.2641	18.6856	14.5934	13.9264	13.6867	20.9613	22.7001	7.34102	3.17539	5.02012	4.59521	4.72627	5.33542	11.5289	20.0584	19.2641	10.7915	12.9326	13.1074	0	0	0	0	0	0	0	0	0	0	0	0	0	0	0	0	0	0	0	0	0	0	0	0	0	0
mir-129-GGAAGCCCTTACCCCAAAAAG	9.40082	4.2976	4.70596	22.388	27.1422	17.1958	11.9585	13.4771	20.2449	19.7596	23.9273	7.4137	3.17539	5.14109	4.66085	6.81319	5.62382	10.844	20.9548	21.9081	9.54029	11.1692	10.5574	0	0	0	0	0	0	0	0	0	0	0	0	0	0	0	0	0	0	0	0	0	0	0	0	0	0
mir-129-TGTTCTCTCGACAGTAGTCAG	0	0	0	0	0	0	0	1.07817	0	0	0	0	0	0	0	0	0	0	0	0	0	0	0	0	0	0	0	0	0	0	0	0	0	0	0	0	0	0	0	0	0	0	0	0	0	0	0	0	0
mir-129-TTTTTGCGGTCTGGGCTTGCT	3.54057	2.66747	0	7.75823	8.04542	8.38062	3.14163	5.03145	5.13251	6.14151	5.9818	5.01513	2.01258	3.02416	2.2976	2.70073	2.6677	5.30785	9.74902	11.4262	4.14456	4.58522	4.94718	0	0	0	0	0	0	0	0	0	0	0	0	0	0	0	0	0	0	0	0	0	0	0	0	0	0
mir-1291-TGGCTCTTACTGAAGACTAGC	0	0	0	0	0	0	0	0	0	0	0	0	0	0	0	0	0	0	0	0	0	0	0	0	0	0	0	0	0	0	0	0	0	0	0	0	0	0	0	0	0	0	0	0	0	0	0	0	0.525222
mir-1298-ATCTGGGCAACTGATTGAACT	3.05221	2.0747	2.65465	2.32747	2.65234	1.30365	0	0	0	0	0	0	0	0	1.83808	2.94625	1.2257	2.39709	2.35322	3.02181	1.56398	0	2.49909	0	0	0	0	0	0	0	0	0	0	0	0	0	0	0	0	0	0	0	0	0	0	0	0	0	0
mir-1298-CATACATCTGGGCAACTGATT	0	0	0	0	0	0	0	0	0	0	0	0	0	0	0.984686	1.28898	0	0	0	0	0	0	0	0	0	0	0	0	0	0	0	0	0	0	0	0	0	0	0	0	0	0	0	0	0	0	0	0	0
mir-1298-CATCTGGGCAACTGATTGAAC	44.3181	60.4627	55.8682	56.081	61.4456	27.3767	2.63492	0	1.56827	1.33512	2.30069	7.63174	17.7554	17.1773	48.7092	60.5822	49.2445	58.7857	88.0771	92.9208	36.6754	25.3363	60.3352	0	0	0	0	0	0	0	0	0	0	0	0	0	0	0	0	0	0	1.76897	1.87839	1.70959	2.14311	0	0	0	0
mir-1298-TACATCTGGGCAACTGATTGA	0	0	0	0	0	0	0	0	0	0	0	0	0	0	0	1.22761	0	0	0	0	0	0	0	0	0	0	0	0	0	0	0	0	0	0	0	0	0	0	0	0	0	0	0	0	0	0	0	0	0
mir-1298-TCATTCGGCTGTCCAGATGTA	2.19759	3.40844	2.05132	1.44082	1.94505	0.744942	1.82417	0	0	0	0	0	0	0	2.2976	3.31452	1.6583	2.56831	3.58584	3.30511	1.79858	2.23383	26.4189	0	0	0	0	0	0	0	0	0	0	0	0	0	0	0	0	0	0	2.43233	3.2445	0	0	0	0	0	0
mir-1298-TTCATTCGGCTGTCCAGATGT	47.1261	57.2025	59.2469	37.1287	46.4157	21.9758	61.1099	0	1.42569	1.46862	1.53379	7.63175	14.2222	12.0361	48.0527	59.2932	45.9279	54.1628	78.3282	78.7561	62.4811	76.6555	975.306	0	0	0	0	0	0	0	0	0	0	0	0	0	0	0	0	0	0	91.1017	102.287	78.8546	81.4377	0	0	0	0
mir-1306-ACCACCTCCCCTGCAAACGTC	0	0	0	0	0	0	0	0	0	0	0	0	0	0	0	0	0	0	0	0	0	0	0	0	0	0	0	0	0	0	0	0	0	0	0	0	0	0	0	0	0	0	0	0	0	0	0	0	0
mir-1306-ACGTTGGCTCTGGTGGTGATG	0	0	1.32732	0	0	0	1.11477	0	0	0	0	1.59903	0	0	0.78775	0	1.2978	0.8561	1.34469	0	1.48578	0	1.07104	0	0	0	1.5549	0	1.29437	0	0.685664	0	0	0	0	0	0	0	0	0	0	0	0	0	0	0	0	0	0
mir-1306-CACCTCCCCTGCAAACGTCCA	0	0	0	0	0	0	0	0	0	0	0	0	0	0	0	0	0	0	0	0	0	0	0	0	0	0	0	0	0	0	0	0	0	0	0	0	0	0	0	0	0	0	0	0	0	0	0	0	0
mir-1306-GACGTTGGCTCTGGTGGTGAT	0	0	0	0	0	0.744942	0	0	0	0	0	0	0	0	0.656455	0	0	0	0	0	0	0	0	0	0	0	0	0	0	0	0	0	0	0	0	0	0	0	0	0	0	0	0	0	0	0	0	0	0
mir-1306-GGACGTTGGCTCTGGTGGTGA	0	0	0	0	0	0	0	0	0	0	0	0	0	0	0	0	0	0	0	0	0	0	0	0	0	0	0	0	0	0	0	0	0	0	0	0	0	0	0	0	0	0	0	0	0	0	0	0	0
mir-130a-CTCTTTTCACATTGTGCTACT	0	0	0	0	0	0	0	0	0	0	0	0	0	0	0	0	0	0	0	0	0	0	0	0	0	0	0	0	0	0	0	0	0	0	0	0	0	0	0	0	0	0	0	0	0	0	0	0	0
mir-130a-GCAGTGCAATGTTAAAAGGGC	0	0	0	0	0	0	0	0	0	0	0	0	0	0	0	0	0	0	0	0	0	0	0	0	0	0.896463	0	0	0	0	0	0	0	0	0	1.87397	1.37432	1.33802	0	0	0	0	0	1.70959	0	0	0	0	0
mir-130b-ACTCTTTCCCTGTTGCACTAC	9.27871	13.041	10.2566	15.6273	18.6546	9.31176	1.72283	1.79694	13.1164	11.482	13.4974	8.79469	7.8714	7.49994	14.1139	19.2119	20.4044	11.2435	20.7307	19.453	12.9029	23.3377	17.9017	16.8291	18.0523	16.7127	0	0	1.29437	0	14.0072	14.6078	14.41	13.3754	9.2635	2.16227	2.33634	1.48669	0	0	0.736871	1.99009	3.92754	0	0	0	0	0	8.92877
mir-130b-CTCTTTCCCTGTTGCACTACT	0	0	0	0	0	0	0	0	0	0	0	0	0	0	0.722103	0	0	0	0	0	0	0	0	0	0	0	0	0	0	0	0	0	0	0	0	0	0	0	0	0	0	0	0	0	0	0	0	0	0
mir-132-AACCGTGGCTTTCGATTGTTA	60.9222	69.0579	52.3689	109.391	104.237	60.4025	7.49939	7.63702	103.933	120.827	137.121	50.4423	35.8237	36.9553	42.4072	50.9455	35.257	70.828	108.136	110.863	55.1305	46.6164	43.1985	1.00173	1.12414	1.47277	0	0	0	0	1.2244	1.29045	1.42909	1.07334	1.14083	0	0	0	0	0	0	0	0	0	0	0	0	0	0
mir-132-ACAGTCTACAGCCATGGTCGC	3.78475	4.1494	2.41331	5.65242	6.27718	3.60056	0	0	6.41563	6.54204	7.5156	2.1805	2.59398	3.14513	2.88842	3.49867	1.8025	3.08197	5.2667	5.85476	4.06636	3.17438	2.24408	0	0	0	0	0	0	0	0	0	0	0	0	0	0	0	0	0	0	0	0	0	0	0	0	0	0
mir-132-CAACCGTGGCTTTCGATTGTT	0.732532	0	0	0	0	0	0	0	1.28313	0	1.07366	0	0	0	0	0	0	0	0	0	0	0	0	0	0	0	0	0	0	0	0	0	0	0	0	0	0	0	0	0	0	0	0	0	0	0	0	0	0
mir-132-CCGTGGCTTTCGATTGTTACT	25.7607	26.2301	23.1678	48.101	46.3274	23.0932	1.62149	2.24619	51.4677	50.8677	54.1429	23.4767	14.5352	15.7257	16.674	20.5009	10.6708	26.9958	37.6513	42.1165	21.1138	16.1071	13.7195	0.93495	0	0	0	0	0	0	0	0	0	0	0.775763	0	0	0	0	0	0	0	0	0	0	0	0	0	0
mir-133a-AAAATGGAACCAAATCAGCTG	0	0	0	0	0	0	0	0	0	0	0	0	0	0	0	0	0	0	0	0	0	0	0	0	0	0	0	0	1.29438	0	0	0	0	0	0	0	0	0	0	0	0	0	0	0	0	0	0	0	0
mir-133a-AATGGATTTGGTCCCCTTCAA	0	0	0	0	0	0	0	0	0	0	0	0	0	0	0	0	0	0	0	0	0	0	0	0	0	0	0	1.79944	0	0	0	0	0	0	0	0	0	0	0	0	0	0	0	0	0	0	0	0	0
mir-133a-CTTCAATGGATTTGGTCCCCT	0	0	0	0	0	0	0	0	0	0	0	0	0	0	0	0	0	0	0	0	0	0	0	0	0	0	0	0	0	3.43369	0	0	0	0	0	0	0	0	0	0	0	0	0	0	0	0	0	0	0
mir-133a-TAAAATGGAACCAAATCAGCT	0	0	0	0	0	0	0	0	0	0	0	0	0	0	0	0	0	0	0	0	0	0	0	0	0	0	0	0	1.72584	0	0	0	0	0	0	0	0	0	0	0	0	0	0	0	0	0	0	0	0
mir-133a-TCTTCAATGGATTTGGTCCCC	0	0	0	0	0	0	0	0	0	0	0	0	0	0	0	0	0	0	0	0	0	0	0	0	0	0	1.5549	3.14901	0	4.00596	0	0	0	0	0	0	0	0	0	0	0	0	0	0	0	0	0	0	0
mir-133a-TGGATGGATTTGGTCCCCTTC	0	0	0	0	0	0	0	0	0	0	0	0	0	0	0	0	0	0	0	0	0	0	0	0	0	0	0	0	1.5101	3.43367	0	0	0	0	0	0	0	0	0	0	0	0	0	0	0	0	0	0	0
mir-133b-CAGCAGGGCTGGCAAAGCTCA	0	0	0	0	0	0	0	0	0	0	0	0	0	0	0	0	0	0	0	0	0	0	0	0	0	0	0	0	0	0	0	0	0	0	0	0	0	0	0	0	0	0	0	0	0	0	0	0	0
mir-133b-GCTGGTCAAACGGAACCAAGT	0	0	0	0	0	0	0	0	0	0	0	0	0	0	0	0	0	0	0	0	0	0	0	0	0	0	0	0	0	0	0	0	0	0	0	0	0	0	0	0	0	0	0	0	0	0	0	0	0
mir-133b-GGCTGGTCAAACGGAACCAAG	0	0	0	0	0	0	0	0	0	0	0	0	0	0	0	0	0	0	0	0	0	0	0	0	0	0	0	0	0	0	0	0	0	0	0	0	0	0	0	0	0	0	0	0	0	0	0	0	0
mir-134-CTGTGGGCCACCTAGTCACCA	4.63936	4.00121	4.46463	4.21162	4.86261	2.17275	0.810747	0.988323	3.70681	4.13884	4.75477	4.65173	5.00907	3.56852	4.13568	5.95387	3.96551	2.96782	4.4823	4.34386	2.81516	5.4082	3.46813	0	0	0	0	0	0	0	0	0	0	0	0	0	0	0	0	0	0	0	0	0	0	0	0	0	0
mir-134-GTGACTGGTTGACCAGAGGGG	0	0	2.05132	1.44081	0	0	0	0	0	0	1.22704	0	0	0	1.90373	3.25315	1.87461	0.799031	0	0	1.17298	1.76355	1.42805	0	0	0	0	0	0	0	0	0	0	0	0	0	0	0	0	0	0	0	0	0	0	0	0	0	0
mir-134-GTGTGACTGGTTGACCAGAGG	0	1.03735	0	0	0	0	0	0	0	0	0	0	0	0	0	0.982083	0	0	0	0	0	0	0	0	0	0	0	0	0	0	0	0	0	0	0	0	0	0	0	0	0	0	0	0	0	0	0	0	0
mir-134-TGTGGGCCACCTAGTCACCAA	0	1.33373	0	1.44081	0	0	0	0	1.28313	0	0	0	0	0	0.853398	1.28898	0.721	0	0	0	1.09479	0	0	0	0	0	0	0	0	0	0	0	0	0	0	0	0	0	0	0	0	0	0	0	0	0	0	0	0
mir-135a-ATATAGGGATTGGAGCCGTGG	0	1.03735	0	0	0	0	0	0	0	0	0	0	0	0	0	0	0	0	0	0	0	0	0	0	0	0	0	0	0	0	0	0	0	0	0	0	0	0	0	0	0	0	0	0	0	0	0	0	0
mir-135a-ATGGCTTTTTATTCCTATGTG	22.4644	77.6531	47.9042	25.8239	31.0323	10.8017	12.3638	10.8715	13.4015	17.3565	17.3318	14.3186	12.0754	12.3387	68.0088	153.082	58.0408	17.0649	37.6513	37.2061	26.9787	59.1376	37.3334	0	0	0	10.1068	4.04871	6.25614	8.58422	0	0	0	0	0	0	0	0	0	0	0	0	0	0	0	0	0	0	0
mir-135a-ATGTAGGGATGGAAGCCATGA	1.0988	3.70482	1.44799	0	0	0	0	0	0	0	0	0	0	0	3.01971	5.09455	2.37931	0	0	0	0.860191	2.11626	1.58106	0	0	0	0	0	0	0	0	0	0	0	0	0	0	0	0	0	0	0	0	0	0	0	0	0	0
mir-135a-TATAGGGATTGGAGCCGTGGC	0	0	0	0	0	0	0	0	0	0	1.07366	0	0	0	0	0	0	0	0	0	0	0	0	0	0	0	0	0	0	0	0	0	0	0	0	0	0	0	0	0	0	0	0	0	0	0	0	0	0
mir-135a-TGGCTTTTTATTCCTATGTGA	3.05221	8.74339	4.94729	2.99245	3.44802	0	0	1.34771	1.8534	0	0	0	0	0	6.82717	14.3016	6.34483	1.65514	3.80996	3.49396	3.67535	6.93664	3.97814	0	0	0	0	0	0	0	0	0	0	0	0	0	0	0	0	0	0	0	0	0	0	0	0	0	0
mir-135a-TGTAGGGATGGAAGCCATGAA	4.2731	11.8554	6.03328	3.76829	4.59737	2.9177	3.64835	1.97664	1.8534	1.60213	1.22704	3.56148	2.50454	3.02416	11.2911	17.8003	8.07526	3.36734	5.71494	4.7216	5.16114	7.17177	7.49727	0	0	0	0	0	1.94157	3.43367	0	0	0	0	0	0	0	0	0	0	0	0	0	0	0	0	0	0	0
mir-135a-TTATGGCTTTTTATTCCTATG	0	0	0	0	0	0	0	0	0	0	0	0	0	0	1.18162	1.8414	1.2257	0	0	0	0	0	0	0	0	0	0	0	0	0	0	0	0	0	0	0	0	0	0	0	0	0	0	0	0	0	0	0	0
mir-135b-ATGGCTTTTCATTCCTATGTG	6.10443	6.22411	2.65464	2.1058	2.82916	1.42781	2.22955	0.898476	3.99195	3.07075	3.52773	2.47122	0	0	4.52956	9.20702	4.54232	1.02733	3.24967	3.39954	2.34597	4.99673	2.29508	0	0	0	0	0	0	0	0	0	0	0	0	0	0	0	0	0	0	0	0	0	0	0	0	0	0
mir-135b-ATGTAGGGCTAAAAGCCATGG	0	1.18554	0	0	0	0	0	0	0	0	0	0	0	0	0.722103	2.20969	0.937304	0	0	0	0	0	0	0	0	0	0	0	0	0	0	0	0	0	0	0	0	0	0	0	0	0	0	0	0	0	0	0	0
mir-135b-TATGGCTTTTCATTCCTATGT	129.658	173.831	59.2468	80.6855	83.283	33.2741	73.7775	32.5248	77.5578	97.4631	98.7764	64.5428	13.4171	18.9917	135.493	277.99	123.075	46.8003	102.757	99.9088	59.1968	132.031	74.0546	2.33737	2.38053	1.28067	0	0	2.1573	0	0.930542	1.13559	1.07182	0	0	1.15321	0	0	0	0	0	4.42242	11.0996	3.63287	0	0	0	0	0
mir-136-AGCTCCATCATCGTCTCAAAT	0	0	0	0	0	0	0	0	0	0	0	0	0	0	0	1.10484	0	0	0	0	0	0	0	0	0	0	0	0	0	0	0	0	0	0	0	0	0	0	0	0	0	0	0	0	0	0	0	0	0
mir-136-AGGACTCCATTTGTTTTGATG	4.88354	7.85423	5.42995	10.8615	12.6428	5.40084	2.12819	1.43756	5.27507	7.07609	8.2825	7.05028	7.42415	5.80641	5.31731	8.6546	6.05642	5.30784	11.9902	9.34873	5.00474	7.93597	5.15119	0	0	0	0	0	0	0	0	0	0	0	0	0	0	0	0	0	0	0	0	0	0	0	0	0	0
mir-136-CTCCATCATCGTCTCAAATGA	0	0	0	0	0	0	0	0	0	0	0	0	0	0	0	0	0.721	0	0	0	0	0	0	0	0	0	0	0	0	0	0	0	0	0	0	0	0	0	0	0	0	0	0	0	0	0	0	0	0
mir-136-GACTCCATTTGTTTTGATGAT	5.24981	8.15061	6.15395	11.6373	10.2557	4.22135	2.53357	0.988323	4.7048	5.60747	5.98179	4.21563	6.88747	5.86688	5.90812	8.71598	5.84012	4.68003	9.86107	8.97101	5.47393	7.11299	5.35519	0	0	0	0	0	0	0	0	0	0	0	0	0	0	0	0	0	0	0	0	0	0	0	0	0	0
mir-136-GGACTCCATTTGTTTTGATGA	26.8595	40.4567	33.3037	49.6527	53.3119	27.0041	10.8437	9.88323	24.3794	32.7102	29.909	34.1612	35.0188	31.6328	32.2321	58.5567	36.8433	33.3881	62.0799	57.0368	28.3863	42.7955	29.3261	0.93495	0	0	0	0	0	0	0	0	0	0	0.821397	0	0	0	0	0	0	0	0	0	0	0	0	0	0
mir-136-TCCATTTGTTTTGATGATGGA	5.98234	7.55784	7.96393	13.4106	12.1123	4.6559	3.24297	2.15633	7.27104	9.34578	8.12912	5.59661	8.40808	7.49994	4.52956	10.7415	4.90282	4.45174	11.0937	11.0485	8.21088	9.64073	5.25319	0	0	0	0	0	0	0	0	0	0	0	0	0	0	0	0	0	0	0	0	0	0	0	0	0	0
mir-137-ACGGGTATTCTTGGGTGGATA	4.2731	8.15061	5.42996	3.21412	4.42055	2.79353	0	0	0.997985	2.13618	2.91421	6.83223	5.41158	4.65722	5.57989	6.01526	4.47021	4.22344	6.83551	6.04363	4.37915	2.93925	2.8051	0	0	0	0	0	0	0	0	0	0	0	0	0	0	0	0	0	0	0	0	0	0	0	0	0	0
mir-137-GTTATTGCTTAAGAATACGCG	0	1.03735	1.32732	0	0	0	0	0	0	0	0	0	0.98392	0	0	0	0	0	0	0	0	0	0	0	0	0	0	0	0	0	0	0	0	0	0	0	0	0	0	0	0	0	0	0	0	0	0	0	0
mir-138-ACGAGCAGCGCATCCTCTTAC	1.0988	2.96386	2.89598	8.42321	8.9295	5.2146	0	0	2.13854	2.4032	2.91422	5.16052	4.20404	3.56852	2.16631	3.25315	3.24451	5.30784	8.74049	8.02669	4.53555	3.29196	3.46813	0	0	0	0	0	0	0	0	0	0	0	0	0	0	0	0	0	0	0	0	0	0	0	0	0	0
mir-138-CAGCTGGTGTTGTGAATCAGG	0	1.11145	1.32732	3.43579	3.09438	1.48988	0	0	0	0	1.38041	1.30829	1.36407	1.36088	0	0	0.901256	1.3983	2.68938	3.30511	1.52488	0	0	0	0	0	0	0	0	0	0	0	0	0	0	0	0	0	0	0	0	0	0	0	0	0	0	0	0
mir-138-CGGCTACTTCACAACACCAGG	0	1.18554	1.32732	4.21161	4.42055	1.73821	0	0	1.42569	1.60213	0	3.56149	1.92312	2.29837	1.37856	1.35036	1.2978	2.73953	4.4823	4.72157	2.11138	1.29328	1.32605	0	0	0	0	0	0	0	0	0	0	0	0	0	0	0	0	0	0	0	0	0	0	0	0	0	0
mir-138-CTATTTCACGACACCAGGGTT	2.56386	3.26025	2.65465	3.98996	5.03943	3.29016	0	0	1.42569	1.46863	2.30069	3.9249	3.17539	3.20562	1.90373	2.39383	2.45141	3.19612	6.27522	6.61023	3.67536	2.52775	2.6521	0	0	0	0	0	0	0	0	0	0	0	0	0	0	0	0	0	0	0	0	0	0	0	0	0	0
mir-138-CTGGTGTTGTGAATCAGGCCG	15.8715	29.935	23.2885	66.61	79.1279	40.1649	3.74969	4.40252	19.8171	21.0948	25.6144	42.011	34.6163	36.7739	17.5274	22.8334	18.7461	43.7183	76.5352	72.9956	33.7039	21.5153	25.348	0	0	0	0	0	0	0	0	0	0	0	0.661678	0	0	0	0	0	0	0	0	0	0	0	0	0	0
mir-138-GCTACTTCACAACACCAGGGC	14.0402	21.7844	19.3064	64.5043	73.381	38.1783	5.37118	4.04313	20.53	15.7544	17.0251	32.8529	25.8951	30.2417	17.3305	18.7823	19.1066	37.8969	60.511	59.492	32.5308	21.9857	28.765	0	0	0	0	0	0	0	0	0	0	0.74308	0	0	0	0	0	0	0	0	0	0	0	0	0	0	0
mir-138-GCTATTTCACGACACCAGGGT	31.621	57.647	55.1442	100.303	120.681	70.7072	14.0867	13.8365	30.6525	31.1081	37.5779	75.2998	61.2269	62.177	47.5276	62.2395	57.464	94.514	141.417	141.742	79.6068	58.0208	62.8343	0	0.793511	0	0	0	0	0	0	0	0	0	0	1.29737	0	0	0	0	0	0	0	0	0	0	0	0	0
mir-138-TGGTGTTGTGAATCAGGCCGA	1.34298	1.03735	1.56865	4.87661	7.16129	4.53174	0	0	2.13854	1.46862	1.22704	1.96245	1.6995	2.72176	1.70679	1.8414	0	3.99515	5.82698	7.08238	2.11137	1.41084	1.63206	0	0	0	0	0	0	0	0	0	0	0	0	0	0	0	0	0	0	0	0	0	0	0	0	0	0
mir-138-TGGTGTTGTGAATCAGGCCGT	6.34861	10.0771	8.20526	22.388	25.6392	14.216	2.1282	1.5274	7.41361	8.54471	9.66291	14.5366	9.8392	13.5484	5.84248	8.10218	5.33542	15.0103	25.325	22.9469	11.6516	8.40625	8.46632	0	0	0	0	0	0	0	0	0	0	0	0	0	0	0	0	0	0	0	0	0	0	0	0	0	0
mir-139-AGACGCGGCCCTGTTGGAGTA	0	0	0	0	0	0	0	0	0	0	0	0	0	0	0	0	0	0.970251	0	0	0	0	0	0	0	0	0	0	0	0	0	0	0	0	0	0	0	0	0	0	0	0	0	0	0	0	0	0	0
mir-139-GGAGACGCGGCCCTGTTGGAG	2.0755	2.81566	2.77531	9.97487	9.54838	7.44942	0	0	1.8534	2.4032	2.45407	3.41611	2.0573	2.41933	1.44421	1.5345	1.6583	7.93319	9.30077	10.0098	5.00475	1.1757	3.92714	0	0	0	0	0	0	0	0	0	0	0	0	0	0	0	0	0	0	0	0	0	0	0	0	0	0
mir-139-TACAGTGCACGTGTCTCCAGT	5.00563	6.81687	6.39528	20.9473	23.5173	10.305	0	0	2.99395	4.53938	2.76083	5.88735	5.67993	4.89916	4.5952	3.98971	4.32602	15.524	22.9718	22.4747	10.3223	4.76158	9.74129	1.80312	0	1.60084	2.33234	0	1.72583	0	0	0	0	0	0	0.864909	0	1.04068	0	0.566017	0	0	0	0	0	0	0	0	0.600254
mir-140-ACAGGGTAGAACCACGGACAG	0	0	0	0	0	0	0	0	0	0	0	0	0	0	0	0	0	0	0	0	0	0	0	0	0	0	0	0	0	0	0	0	0	0	0	0	0	0	0	0	0	0	0	0	0	0	0	0	0
mir-140-CACAGGGTAGAACCACGGACA	0	0	0	0	0	0	0	0	0	0	0	0	0	0	0.853398	0	0	0	0	0	0	1.23449	1.12204	0	0	0	0	0	1.5101	2.8614	0	0.72265	0	0	0	1.87397	1.92404	1.93269	0	0	0	0	0	0	2.35741	0	0	0	0
mir-140-CTACCACAGGGTAGAACCACG	0	0	0	0	0	0	0	0	0	0	0	0	0	0	0	0	0	0	0	0	0	0	0	0	0	0	0	0	0	0	0	0	0	0	0	0	0	0	0	0	0	0	0	0	0	0	0	0	0
mir-140-GGTTTTACCCTATGGTAGGTT	0	0	0	0	0	0	0	0	0	0	0	0	0	0	0	0	0	0	0	0	0	0	0	0	0	0	0	0	0	0	0	0	0	0	0	0	0	0	0	0	0	0	0	0	0	0	0	0	0
mir-140-GTGGTTTTACCCTATGGTAGG	0	0	0	0	0	0	0	0	0	0	0	0	0	0	0	0	0	0	0	0	0	0	0	0	0	0	0	0	0	0	0	0	0	0	0	0	0	0	0	0	0	0	0	0	0	0	0	0	0
mir-141-AACACTGTCTGGTAAAGATGG	0	0	0	0	0	0	0	0	0	0	0	0	0	0	0	0	0	0	0	0	0	0	0	164.751	153.346	163.092	0	0	0	0	192.721	139.522	178.874	168.184	158.073	22.1993	25.2874	18.7322	0	0	0	43.7819	38.5923	45.9452	46.9339	3.36848	0	0	0.900381
mir-141-ACACTGTCTGGTAAAGATGGC	0	0	0	0	0	0	0	0	0	0	0	0	0	0	0	0	0	0	0	0	0	0	0	39.9358	34.7822	39.3164	0	0	0	0	46.5762	32.4159	43.8254	42.6858	38.8794	2.88303	3.29836	2.67604	0	0	0	5.74913	3.75677	6.41096	5.78635	0	0	0	0
mir-141-ATCTTCCAGTGCAGTGTTGGA	0	0	0	0	0	0	0	0	0	0	0	0	0	0	0	0	0	0	0	0	0	0	0	2.00347	1.45477	2.24117	0	0	0	0	1.81211	1.85824	1.78636	1.48616	0.775763	0	0	0	0	0	0	0	0	0	0	0	0	0	0
mir-141-CACTGTCTGGTAAAGATGGCC	0	0	0	0	0	0	0	0	0	0	0	0	0	0	0	0	0	0	0	0	0	0	0	1.53599	1.91765	1.79293	0	0	0	0	2.2529	1.70339	3.09636	1.81642	1.64279	0	0	0	0	0	0	0	0	0	0	0	0	0	0
mir-141-CATCTTCCAGTGCAGTGTTGG	0	0	0	0	0	0	0	0	0	0	0	0	0	0	0	0	0	0	0	0	0	0	0	34.2593	34.5176	36.6911	0	0	0	0	36.683	34.5322	38.7045	27.6591	24.1399	6.19851	5.77212	5.50075	0	0	0	9.95045	8.19662	9.61644	10.5012	0	0	0	0.525222
mir-141-CCATCTTCCAGTGCAGTGTTG	0	0	0	0	0	0	0	0	0	0	0	0	0	0	0	0	0	0	0	0	0	0	0	7.27925	7.14158	9.4769	0	0	0	0	7.78719	6.7619	9.17002	7.26566	5.84104	1.00907	0	1.04068	0	0	0	1.99009	2.04915	0	0	0	0	0	0
mir-141-CTAACACTGTCTGGTAAAGAT	0	0	0	0	0	0	0	0	0	0	0	0	0	0	0	0	0	0	0	0	0	0	0	26.045	23.0779	27.0861	0	0	0	0	23.3126	18.5824	19.769	22.2924	17.9338	6.34266	6.87158	6.6901	0	0	0	11.0561	9.22118	13.463	13.0729	0	0	0	0
mir-142a-GGAGGGTGTAGTGTTTCCTAC	0	0	0	0	0	0	0	0	0	0	0	0	0	0	0	0	0	0	0	0	0	0	0	0	0	0	0	0	0	0	0	0	0	0	0	0	0	0	0	0	0	0	0	0	0	0	0	0	0.600254
mir-142a-GTGTAGTGTTTCCTACTTTAT	0	0	0	0	0	0	0	0	0	0	0	0	0	0	0	0	0	0	0	0	0	0	0	0	0	0	0	0	0	0	0	0	0	0	0	0	0	0	0	0	0	0	0	0	0	0	0	0	1.87579
mir-142a-TAAAGTAGAAAGCACTACTAA	0	0	0	0	0	0	0	0	0	0	0	0	0	0	0	0	0	0	0	0	0	0	0	0	0	0	0	0	0	0	0	1.90986	0	0	0	0	0	0	0	0	0	0	0	0	0	0	0	0	6.3777
mir-143-AGATGAAGCACTGTAGCTCAG	0	0	0	0	0	0	0	0	0	0	0	0	0	0	0	0	0	0	0	0	0	0	0	0	0	0	0	0	0	0	0.73464	0	0	0	0	0	0	0	0	0	0	0	0	0	0	0	0	0	0
mir-143-AGTCTGAGATGAAGCACTGTA	0	0	0	0	0	0	0	0	0	0	0	0	0	0	0	0	0	0	0	0	0	0	0	0	0	0	0	0	0	0	0	0	0	0	0	0	0	0	0	0	0	0	0	0	0	0	0	0	0
mir-143-GTCTGAGATGAAGCACTGTAG	0	0	0	0	0	0	0	0	0	0	0	0	0	0	0	0	0	0	0	0	0	0	0	0	0	0.83243	0	0	0	0	0	0	0	0	0	0	0	0	0	0	0	0	0	0	0	0	0	0	0
mir-143-TCAGTTGGGAGTCTGAGATGA	0	0	0	0	0	0	0	0	0	0	0	0	0	0	0	0	0	0	0	0	0	0	0	0	0	0	0	0	0	0	0	0	0	0	0	0	0	0	0	0	0	0	0	0	0	0	0	0	0
mir-144-ATATCATCATATACTGTAAGT	0	0	0	0	0	0	0	0	0	0	0	0	0	0	0	0	0	0	0	0	0	0	0	0	0	0	0	0	2.1573	0	0	0	0	0	0	0	0	0	0	0	0	0	0	0	0	0	0	0	0.600254
mir-145a-CAGTTTTCCCAGGAATCCCTT	0	0	0	0	0	0	0	0	0	0	0	0	0	0	0	0	0	0	0	0	0	0	0	2.27059	1.52089	2.43327	0	1.79944	1.94157	0	1.4203	1.80662	3.21545	1.48616	0.958296	0	0	0	0	0	0	0	0	0	0	0	0	0	0
mir-145a-GGTCCAGTTTTCCCAGGAATC	0	0	0	0	0	0	0	0	0	0	0	0	0	0	0	0	0	0	0	0	0	0	0	2.27059	1.19026	1.79293	0	0	0	0	1.76314	1.65177	2.02454	1.1559	0.821397	0	0	0	0	0	0	0	0	0	0	0	0	0	0
mir-146a-ACCTGTGAAATTCAGTTCTTC	0	0	0	0	0	0	0	0	0	0	0	0	0	0	0	0	0	0	0	0	0	0	0	0	0	0	0	0	0	0	0	0	0	0	0	0	0	0	0	0	0	0	0	0	0	0	0	0	0.600254
mir-146a-AGAACTGAATTCCATGGGTTA	0	0	0	0	0	0	0	0	0	0	0	0	0	0	0	0	0	0	0	0	0	0	0	0	0	0	0	0	0	0	0	1.08397	0.952727	0	0	0.864909	0	0	0	0	0	0	1.70763	0	0	0	0	0	1.57567
mir-146a-CCTGTGAAATTCAGTTCTTCA	0	0	0	0	0	0	0	0	0	0	0	0	0	0	0	0	0	0	0	0	0	0	0	0	0	0	0	0	0	0	0	0	0	0	0	0	0	0	0	0	0	0	0	0	0	0	0	0	0.825349
mir-146a-GAACTGAATTCCATGGGTTAT	0	0	0	0	0	0	0	0	0	0	0	0	0	0	0	0	0	0	0	0	0	0	0	0	0	0	0	0	0	0	0	0	0	0	0	0	0	0	0	0	0	0	0	0	0	0	0	0	0.675285
mir-146b-AGAACTGAATTCCATAGGCTG	1.22089	1.77831	1.80998	0	2.21028	1.05534	0	0	1.28313	0	1.53379	1.52635	1.16282	0	2.2976	2.08693	1.87461	1.02733	2.1291	1.69978	0.938388	0	1.58106	1.8699	1.85152	0	0	0	0	0	0	0	0	0	0.821397	1.58566	1.37432	0	0	0	0	3.53794	3.75678	4.06028	3.85757	2.33203	0	0	0.825349
mir-146b-GAACTGAATTCCATAGGCTGT	0	2.0747	0.844662	0	0	0	0.810747	0	0	0	0	0	0	0	0	1.22761	0	0	1.45674	0	0.938388	1.23449	0	0.93495	0	0	0	0	0	0	0	0	0	0	0	0.864909	1.09946	0	0	0	0	2.21121	1.87839	0	0	0	0	0	0
mir-146b-GCCCTAGGGACTCAGTTCTGG	1.22089	1.33373	1.08599	0	2.29868	0.869103	0	0.718782	0	1.33511	1.38041	0	1.11809	0	0	1.8414	1.0815	0	1.79291	1.60534	1.17299	0	1.07104	0	0	0	0	0	0	0	0	0	0	0	0	0	0	0	0	0	0	0	2.39067	2.35069	2.14311	0	0	0	0
mir-147-AGTGTGCGGAAATGCTTCTGC	0	0	0	0	0	0	0	0	0	0	0	0	0	0	0	0	0	0	0	0	0	0	0	11.7536	7.07549	7.94013	0	0	0	0	2.79163	2.73574	4.52545	0	0.958296	0	0	0	0	0	0	0	0	0	0	0	0	0	0
mir-147-CTAGTGGAAACATTTCTGCAC	0	0	0	0	0	0	0	0	0	0	0	0	0	0	0	0	0	0	0	0	0	0	0	0.93495	1.12414	0	0	0	0	0	0	0	0	0	0	0	0	0	0	0	0	0	0	0	0	0	0	0	0
mir-147-GGAAACATTTCTGCACAAACT	0	0	0	0	0	0	0	0	0	0	0	0	0	0	0	0	0	0	0	0	0	0	0	0	0	1.08856	0	0	0	0	0	0	0	0	0	0	0	0	0	0	0	0	0	0	0	0	0	0	0
mir-147-GTGGAAACATTTCTGCACAAA	0	0	0	0	0	0	0	0	0	0	0	0	0	0	0	0	0	0	0	0	0	0	0	0	0	0	0	0	0	0	0	0	0	0	1.55153	0	0	0	0	0	0	0	0	0	0	0	0	0	0
mir-147-GTGTGCGGAAATGCTTCTGCT	0.732532	1.03735	1.08599	0	0	0	0	0	0	0	0	0	0	0	0	1.04346	0	0	0	0	0	0	0	156.404	116.051	116.285	0	0	2.1573	0	37.5157	43.7202	46.2072	11.8893	16.291	1.15321	0	1.78403	0	0	0	5.52803	3.58601	2.56439	5.14345	0	0	0	1.05044
mir-147-TGGAAACATTTCTGCACAAAC	0	1.03735	0	0	0	0	0	0	0	0	0	0	0	0	0	0	0	0	0	0	0	0	0	22.5056	14.68	15.4321	0	0	0	0	5.04453	5.47148	7.14545	1.65129	2.73799	0	0	0	0	0	0	0	0	0	0	0	0	0	0
mir-147-TGTGCGGAAATGCTTCTGCTA	0	0	0	0	0	0	0	0	0	0	0	0	0	0	0	0	0	0	0	0	0	0	0	9.01557	5.68681	5.44283	0	0	0	0	1.86109	2.83897	2.14363	0	1.14083	0	0	0	0	0	0	0	0	0	0	0	0	0	0
mir-149-AGGGAGGGACGGGGGCGGTGC	0	0	0	0	0	0	0	0	0	0	0	0	0	0	0	0	0	0	0	0	0	0	0	0	0	0	0	0	0	0	0	0	0	0	0	0	0	0	0	0	0	0	0	0	0	0	0	0	0
mir-149-TGGCTCCGTGTCTTCACTCCC	1.22088	1.63012	0.844662	1.44081	1.59139	0	0	0	0.997985	0	0	0	1.11809	0	0.984686	2.4552	1.65831	0.913175	2.01703	1.7942	1.01659	1.29326	1.27505	0	0	0	3.62809	2.2493	0	0	0	0	0	0	0	0	0	0	0	0	0	0	0	0	0	0	0	0	0
mir-150-CCTGGTACAGGCCTGGGGGAT	1.95342	0	1.08599	1.99497	1.76823	0.869103	0	0	2.70882	2.13617	2.60745	1.38098	1.43116	1.39112	1.44421	1.04346	1.8025	0.741955	0	0	1.25119	1.93991	1.58106	0	0	0	1.5549	0	2.1573	0	0	3.66486	0	0	0	0	0	0	0	0	0	5.08578	4.61059	3.84658	4.07188	4.40495	0	4.58793	13.3556
mir-150-CTGGTACAGGCCTGGGGGATA	0	0	0.965322	0	0	0	0	0	1.14056	1.33511	0	0	0	0	0.722103	0	0	0	0	1.51091	0	1.11692	0.918033	0	0	0	0	0	0	0	0	1.39368	0	0	0	0	0	0	0	0	0	0	0	0	0	0	0	2.54884	7.27808
mir-150-GTCTCCCAACCCTTGTACCAG	0	0	0	0	0	0	0	0	0	0	0	0	0	0	0	0	0	0	0	0	0	0	0	0	0	0	0	0	0	0	0	0	0	0	0	0	0	0	0	0	0	0	0	0	0	0	0	0	2.17592
mir-150-TCCCAACCCTTGTACCAGTGC	0	0	0	0	0	0	0	0	0	0	0	0	0	0	0	0	0	0	0	0	0	0	0	0	0	0	0	0	0	0	0	0	0	0	0	0	0	0	0	0	0	0	0	0	0	0	0	0	1.6507
mir-150-TGTCTCCCAACCCTTGTACCA	0	0	0	0	0	0	0	0	0	0	0	0	0	0	0	0	0	0	0	0	0	0	0	0	0	0	0	0	0	0	0	0	0	0	0	0	0	0	0	0	0	0	0	0	0	0	0	0	2.25095
mir-151-AGACTGAGGCTCCTTGAGGAC	0	0	0	0	0	0	0	0	0	0	0	0	0	0	0	0	0	0	0	0	0	0	0.918033	0	0	0	0	0	0	0	0	0	0	0	0	0	0	0	0	0	0	0	0	0	0	0	0	0	0
mir-151-CCCTCGAGGAGCTCACAGTCT	0	0	0	0	0	0	0	0	0	0	0	0	0	0	0	0	0	0	0	0	1.09478	0	1.07104	0	0	0	0	0	0	0	0	0	0	0	0	0	0	0	0	0	0	0	0	0	0	0	0	0	0
mir-152-GGTTCTGTGATACACTCCGAC	0	0	0	0	0	0	0	0	0	0	0	0	0	0	0	0	0	0	0	0	0	0	0	0	0	0	0	0	0	0	0	0	0	0	0	0	0	0	0	0	0	0	0	0	0	0	0	0	0
[truncated: 1,197 more rows]
[truncated: 3 more columns]

## Sheet: Table S5 Mouse Tissues Transpsd
miRNAs per 10 pg total RNA	let-7a-AGGTAGTAGGTTGTATAGTTT	let-7a-ATGAGGTAGTAGGTTGTATAG	let-7a-CTATACAATCTACTGTCTTTC	let-7a-CTGTACAGCCTCCTAGCTTTC	let-7a-GAGGTAGTAGGTTGTATAGTT	let-7a-TAGAGTTACATCAAGGGAGAT	let-7a-TAGGGTCACACCCACCACTGG	let-7a-TATACAATCTACTGTCTTTCC	let-7a-TGAGGTAGTAGGTTGTATAGT	let-7a-TTAGGGTCACACCCACCACTG	let-7a-TTGAGGTAGTAGGTTGTATAG	let-7b-AGGTAGTAGGTTGTGTGGTTT	let-7b-CAGGGCAGTGATGTTGCCCCT	let-7b-CTATACAACCTACTGCCTTCC	let-7b-GAGGTAGTAGGTTGTGTGGTT	let-7b-GTGAGGTAGTAGGTTGTGTGG	let-7b-TCAGGGCAGTGATGTTGCCCC	let-7b-TGAGGTAGTAGGTTGTGTGGT	let-7c-AACTGTACAACCTTCTAGCTT	let-7c-AGGTAGTAGGTTGTATGGTTT	let-7c-CTATACAATCTACTGTCTTTC	let-7c-CTGTACAACCTTCTAGCTTTC	let-7c-GAGGTAGTAGGTTGTATGGTT	let-7c-GGTAGTAGGTTGTATGGTTTA	let-7c-GGTAGTAGGTTGTATGGTTTT	let-7c-GTGAGGTAGTAGGTTGTATGG	let-7c-GTTGAGGTAGTAGGTTGTATG	let-7c-TAGAGTTACACCCTGGGAGTT	let-7c-TATACAATCTACTGTCTTTCC	let-7c-TGAGGTAGTAGGTTGTATGGT	let-7c-TGTACAACCTTCTAGCTTTCC	let-7c-TTGAGGTAGTAGGTTGTATGG	let-7c-TTGGGCTCTGCCCCGCTCTGC	let-7d-AAGAGGTAGTAGGTTGCATAG	let-7d-AGAGGTAGTAGGTTGCATAGT	let-7d-AGGTAGTAGGTTGCATAGTTT	let-7d-CTATACGACCTGCTGCCTTTC	let-7d-GAGGTAGTAGGTTGCATAGTT	let-7d-TATACGACCTGCTGCCTTTCT	let-7d-TTAGGGCAGAGATTTTGCCCA	let-7e-AGGAAGACACCCGAGGAGATC	let-7e-AGGTAGGAGGTTGTATAGTTG	let-7e-CTATACGGCCTCCTAGCTTTC	let-7e-CTGAGGTAGGAGGTTGTATAG	let-7e-GAGGAAGACACCCGAGGAGAT	let-7e-GAGGTAGGAGGTTGTATAGTT	let-7e-TAGGAGGTTGTATAGTTGAGG	let-7e-TATACGGCCTCCTAGCTTTCC	let-7e-TGAGGTAGGAGGTTGTATAGT
[truncated: 52 more rows]
[truncated: 2,379 more columns]

[truncated: 2 more sheets: Table S5 Mouse Cell Lines, Table S5 Human Cell Lines]
