# Supplementary material
Source: HighWire-hosted journal article supplement (doi:10.1101/rna.080566.125)
Supplement: SupplementalTable6.xlsx [file SupplementalTable6.xlsx]

## Sheet: Table S6
	miRNAs per 10 pg total RNA	Reporter name	BFP reads	AcrIIC3-mCherry reads	Ratio of AcrIIC3-mCherry reads to BFP reads	Mean ratio of AcrIIC3-mCherry reads to BFP reads for no-miR reporter	Repression = ratio of reporter mRNA to no-miR reporter	Number of reporter mRNAs per BFP positive cell	Q1, Q2, Q3 for number of reporter mRNAs per cell in experiments with no detectable repression (BFP positive cells only)	Q1, Q2, Q3 for number of reporter mRNAs per 10 pg total RNA in experiments with no detectable repression (BFP positive cells only); based on each HEK293T cell having 40 pg total RNA (see Table S3)	Total mRNAs per cell	Mean mRNAs per cell	Reads mapping uniquely on hg38	Cells per library prep	Mean cells per library prep	Fraction of BFP positive cells	Mean fractioin of BFP positive cells	ERCC reads
100 ng plasmid per 500,000 cells	0	No_miR_rep1	6687	12714	1.9013	1.68324		4418.78	4085.29	1021.32	996004	1.07817e+06	16105255	151900	174575	0.1288	0.17794	57739
	0	No_miR_rep2	7049	10328	1.46517			4657.1	4674.52	1168.63	993358		12380343	132300		0.1654		44503
	1	miR-1_rep1	21166	37372	1.76566		1.04897	16139.9	6606.7	1651.67	1.07244e+06		13955456	159250		0.2105		46466
	1	miR-1_rep2	17242	28444	1.64969		0.980072	13039.6			1.16031e+06		14224200	139650		0.34		43774
	70	miR-151a_rep1	3426	6164	1.79918		1.06888	3469.6			975528		9739771	164150		0.1469		35651
	70	miR-151a_rep2	5668	11438	2.018		1.19888	6662.5			1.0621e+06		10247152	143325		0.2082		34451
	291	miR-125a_rep1	6176	10524	1.70402		1.01234	4691.93			1.02966e+06		12979296	117968		0.1537		45011
	291	miR-125a_rep2	5892	11505	1.95265		1.16006	6439.29			1.18538e+06		11902332	137200		0.1808		35854
	658	miR-378a_rep1	3939	7519	1.90886		1.13404	2677.66			828562		13075442	210700		0.0996		56350
	658	miR-378a_rep2	7066	13602	1.92499		1.14363	6324.86			1.08994e+06		13172866	159250		0.1047		43156
	1000	miR-107_rep1	6993	9831	1.40583		0.835197	4638.65			1.15364e+06		13740546	203350		0.1678		42530
	1000	miR-107_rep2	10187	13621	1.3371		0.79436	3974.13			723303		13932010	171500		0.2119		68779
	1661	miR-221_rep1	5069	8052	1.58848		0.943705	7106.56			1.84663e+06		11758454	186200		0.1648		22737
	1661	miR-221_rep2	10899	19277	1.76869		1.05077	8979.93			1.05465e+06		12723372	134750		0.2531		43078
	3657	miR-16_rep1	5131	3786	0.737868		0.438363	1356.43			963659		15115905	90405		0.1301		56011
	3657	miR-16_rep2	9159	9078	0.991156		0.588839	4796.25			1.08805e+06		11573510	164150		0.2472		37982
	5940	miR-20a_rep1	6919	2643	0.381992		0.226939	922.719			992814		15981672	126175		0.1542		57480
	5940	miR-20a_rep2	8025	3996	0.497944		0.295825	1640.53			925955		12675310	183750		0.2339		48880
	6572	miR-92a_rep1	3482	2269	0.651637		0.387133	1127.55			1.13261e+06		12808709	166600		0.0904		40382
	6572	miR-92a_rep2	4088	2385	0.583415		0.346603	818.184			863408		14144244	177625		0.1668		58496
10 ng plasmid per 500,000 cells	0	No_miR_rep1	1359	796	0.585725	0.500391		953.63	937.631	234.408	1.28601e+06		17416048	213150		0.0468	0.061635	48358
	0	No_miR_rep2	1501	623	0.415057			962.404	1064.48	266.12	1.14606e+06		12036769	117968		0.0692		37503
	1	miR-1_rep1	4670	2624	0.561884		1.12289	3357.54	2293.92	573.479	1.09186e+06		13844600	128625		0.0565		45277
	1	miR-1_rep2	3547	2458	0.69298		1.38488	3886			1.0524e+06		10800227	200900		0.1341		36645
	70	miR-151a_rep1	1006	420	0.417495		0.834338	642.592			1.12388e+06		11918099	158025		0.0464		37866
	70	miR-151a_rep2	1365	615	0.450549		0.900395	1012.92			1.18773e+06		11700047	160475		0.0675		35175
	291	miR-125a_rep1	1033	651	0.630203		1.25942	889.635			1.00772e+06		11964108	142100		0.0536		42394
	291	miR-125a_rep2	1359	581	0.42752		0.854373	1116.04			1.36304e+06		11512662	165375		0.0721		30160
	658	miR-378a_rep1	4227	1562	0.369529		0.738481	1939.38			1.08276e+06		14148977	189875		0.0279		46661
	658	miR-378a_rep2	3094	1226	0.396251		0.791883	1799.48			1.17389e+06		12976039	200900		0.0587		39471
	1000	miR-107_rep1	4914	1393	0.283476		0.566509	1850.29			1.18841e+06		14516094	187425		0.0287		43616
	1000	miR-107_rep2	2139	380	0.177653		0.355029	591.277			1.07102e+06		11167712	167825		0.0951		37233
	1661	miR-221_rep1	902	274	0.303769		0.607064	440.711			1.11261e+06		11223087	153125		0.0424		36019
	1661	miR-221_rep2	1166	388	0.332762		0.665004	582.238			1.17035e+06		12653789	183750		0.0541		38607
	3657	miR-16_rep1	1111	139	0.125113		0.25003	193.606			970156		11300816	148225		0.0481		41594
	3657	miR-16_rep2	1620	226	0.139506		0.278794	321.928			1.11697e+06		12722284	161700		0.0807		40671
	5940	miR-20a_rep1	897	76	0.0847269		0.169321	123.704			934656		9316517	171500		0.0498		35593
	5940	miR-20a_rep2	1620	115	0.0709877		0.141864	211.405			1.2711e+06		11218492	178850		0.0874		31515
	6572	miR-92a_rep1	4083	352	0.0862111		0.172288	257.544			628967		13947356	191100		0.0315		79182
	6572	miR-92a_rep2	2574	159	0.0617716		0.123447	198.358			1.00915e+06		13124303	641900		0.0821		46439
Number of ERCC mRNAs added before library prep
623367330
