# Supplementary material
Source: HighWire-hosted journal article supplement (doi:10.1101/rna.080566.125)
Supplement: SupplementalTable7.xlsx [file SupplementalTable7.xlsx]

## Sheet: Table S7
Each HEK293T cells contains ~1,000,000 mRNAs (see Table S6) in 40 pg total RNA (see Table S3). Number of transcripts per 10 pg total RNA = (TPM * 10) / 40
Gene name	Transcripts per 10 pg total RNA			Transcripts per million (TPM)
	Q1	Median	Q3	47_10ng_miR-151a_rep2	9_10ng_BFP_Only_Ctrl_rep1	45_10ng_miR-20a_rep2	3_100_ng_BFP_Only_Ctrl_rep1	7_10ng_miR92a_rep1	1_100ng_miR92a_rep1	46_10ng_miR-125a_rep2	30_100_ng_miR-221_rep1_2	28_100_ng_miR-125a_rep1	33_10ng_miR-20a_rep1	12_10ng_miR-1_rep1	32_10ng_miR-16_rep1	38_100_ng_miR-16_rep2	16_100_ng_miR-107_rep2	41_100_ng_miR-151a_rep2	2_100_ng_miR-378a_rep1	44_10ng_miR-16_rep2	6_100_ng_miR-1_rep1	4_100_ng_miR-107_rep1	43_10ng_No_miR_rep2	8_10ng_miR-378a_rep1	29_100_ng_miR-151a_rep1	15_100_ng_BFP_Only_Ctrl_rep2	22_10ng_miR-107_rep2	35_10ng_miR-151a_rep1	13_100ng_miR92a_rep2	10_10ng_miR-107_rep1	19_10ng_miR92a_rep2	37_100ng_No_miR_rep2	39_100_ng_miR-20a_rep2	20_10ng_miR-378a_rep2	27_100_ng_miR-20a_rep1	31_10ng_No_miR_rep1_2	14_100_ng_miR-378a_rep2	48_10ng_miR-221_rep2	26_100_ng_miR-16_rep1	25_100ng_No_miR_rep1	34_10ng_miR-125a_rep1	40_100_ng_miR-125a_rep2	24_10ng_miR-1_rep2	42_100_ng_miR-221_rep2	21_10ng_BFP_Only_Ctrl_rep2	36_10ng_miR-221_rep1	18_100_ng_miR-1_rep2
ENSG00000198804_MT-CO1	3955.34	4106.57	4359.78	16346.6	15946.5	16865.9	16270.8	15096.3	15503.2	16490.6	16036.5	18502.4	16344.4	16145.3	17774.7	17786.9	14424.3	17526.5	16242.1	16635.4	17412.5	17350.9	16909.1	17213	17658	16252.3	15455.3	17198.7	14710.6	16116.3	15715	16297.1	15751.4	15576.6	17471.3	15415.9	14928.9	17448	17455.5	17352.7	17962.4	17687.2	17009.2	16362	16502.6	18966.6	15779.6
ENSG00000210082_MT-RNR2	3042.68	3191.88	3331.49	11842.1	12157.6	12426	13844.8	13419.3	19056	12211.1	12047.1	12913.3	13004.8	12976	13438.8	13060	11846	12680.7	16007.2	12601.3	15424.3	15759.8	11810.5	14044.4	12597.5	13572.1	12697.6	13338.3	10816.8	14625.6	12554.8	12209.9	11575.1	12964.9	12837.5	13288.9	12499.6	11178.5	12494.1	11833	13268.8	12473.6	13092.9	10870.2	13091.2	13064.1	11493.5
ENSG00000198712_MT-CO2	2882.04	3020.89	3191.51	11945.6	11549.9	12004.9	11520.9	11439.1	13609.5	11733.4	10970.3	12771.2	11767.2	12615.8	12162.3	13366.1	10156.3	13264.5	12729.2	12432	11893.5	13303.2	12860.3	11969.6	12639.4	11504	11271.1	11833.1	11494.5	11821.2	11106.2	12562.1	13363.8	10176.2	12517.1	11064	11203.9	13512.4	12750.4	12433.1	12689.3	12887.6	11819.5	12938.9	12517.7	14705	11726.3
ENSG00000198938_MT-CO3	2816.15	2938.69	3053.46	11484.8	11591.9	11325.6	10916.1	10599	12287.7	11119.4	11702.7	12653.9	11714.8	11466	12175.9	11964.9	10675.5	12441.9	12024.6	11744	11288.6	12010.6	12015.3	11326.5	12727.8	10904.4	10915.7	12273.7	11341.9	10926.4	10967.1	11657.3	12023.3	10167.5	12221.3	11256.6	11084.2	13213.9	12540.2	12191.4	12724	12108.9	12052.2	12427.1	11970.7	14742.7	11765.5
ENSG00000198899_MT-ATP6	2320.3	2505.32	2659.2	9846.23	9660.71	9978.06	9380.65	9248.03	10457.9	9912.96	8856.33	10704	9514.82	9652.93	10448.9	10875.6	8565.21	11270.7	10200.8	10650.9	10135.7	10385.1	10797.9	9886.8	10673.6	9487.69	8464.93	10132.3	8709.28	9203.91	8732.66	10761.5	10758.5	8111.59	10199.2	8918.8	8584.94	10958	10342.6	9989.76	10527.5	11165.4	9174.66	10594.5	10052.8	11549.4	9419.68
ENSG00000198886_MT-ND4	2149.97	2270.22	2440.13	9073.9	9087.9	9328.72	9274.92	8003.64	8035.52	9550.02	8364.6	10407.4	9622.69	8658.59	10534.4	9772.46	7897.46	9932.5	8684.94	9504.91	8449.89	8898.45	9724.74	9130.98	10451.1	8610.02	8596.48	10120.5	7767.48	8800.69	8411.26	9267.5	8774.69	8507.82	10087.1	8685.13	8269.16	9311.76	10160.8	9460.04	10883	9807.22	9073.83	8762.49	8692.34	11252	8329.65
ENSG00000228253_MT-ATP8	1915.31	2062.2	2162.33	8244.37	7660.71	8470.05	7136.02	7662.81	7833.75	8253.22	8119.06	8686.86	8536.29	7712.3	8542.47	8597.03	7321.46	8611.53	7522.85	8871.64	7395.74	8271.42	9430.2	7139.34	9222.82	7976.99	7801.22	8523.72	7090.13	7197.88	7610.74	8916.43	8190.09	6672.03	9150.49	8338.01	8100.52	8974.01	8413.57	7945	8843.95	9026.23	7611.54	7766.58	8661.9	10085.1	8549.81
ENSG00000212907_MT-ND4L	1745.97	1896.77	2030.43	7596.85	7431.16	7882.94	7774.12	6416.1	5928.42	7680.17	7590.74	9102.61	8276.57	6915.67	9224.31	7914.07	6401.9	7982.91	6980.18	7524.1	6825.23	7592.1	8149.82	7583.42	9324.32	6783.67	7329.05	8971.07	6451.6	7230	7112.93	7475.81	5814.78	6940.7	8738.17	7962.73	6994.94	7928.89	9063.16	8586.01	9726.88	8037.43	7552.52	6880.15	7171.51	9771.86	7070.55
ENSG00000140988_RPS2	1716.28	1752.77	1852.38	7145.47	7453.6	6945.59	7961.81	6801.35	6946.3	7223.39	5962.89	6870.16	7026.48	7028.08	7391.36	7300.65	7948.69	7011.89	7190.18	7145.05	6780.6	6910.05	6848.29	6803.04	6724.83	7215.76	7415.58	6937.61	8408.83	6918.56	7832.71	6992.7	7860.94	7807.85	6602.25	6384.31	7306.09	6911.13	6765.14	6562.21	6984.46	6863.43	7722.96	7503.22	6962.48	7010.23	7604.09
ENSG00000198727_MT-CYB	1426.04	1505.3	1599.76	5971.16	5922.14	5996.3	5473.53	5232.87	6364.03	6118.76	6111.74	6408.91	5718.04	5983.16	5908.17	6277.75	5262.66	6420.74	6539.08	6247.77	5586.95	6377.15	6406.34	5919.44	6664.31	5568.64	5233.16	6561.89	5999.12	5699.52	5275.8	5963.32	5799.62	4504.74	6079.23	6043.27	5587.56	6877.01	6355.42	6332.5	6774.05	6433.36	5454.22	6272.5	6735.16	7931.56	5891.85
ENSG00000156508_EEF1A1	1383.05	1468.49	1658.83	6913.56	5599.01	7700.07	5716.24	4795.76	4831.77	5550.11	7431.26	5498.85	5887.97	5208.07	5961.21	6670.88	6331.75	6287.61	5442.26	5833.53	5074.16	4913.98	5526.22	5987.76	7093.89	5289.52	5870.54	5870.52	5506.66	6080.65	7454.73	7175.81	5811.04	6792.23	5550.96	6528.56	6208.61	6415.1	7686.47	7181.81	5800.61	5697.05	5877.39	7304.39	6136.83	5661.51	5358.87
ENSG00000204628_RACK1	1376.24	1441.49	1486.59	6022.58	5431.71	5962.16	6029.98	5267.56	5405.69	5831.57	5536.32	5926.28	6183.57	5430.56	6036.57	6074.31	5825.98	5951.65	5461.36	5926.04	5509.51	5576.52	5795.06	5503.42	5747.37	5385.28	5484.26	5782.96	5704.34	5448.16	5668.68	5799.64	6130.77	5726.43	5777.85	5540.6	5579.75	5976.58	5754.09	5692.29	6016.74	5842.36	5800.4	6061.12	5240.74	5930.5	5270.05
ENSG00000211459_MT-RNR1	1105.95	1192.53	1464.69	4505.54	4642.39	4427.77	5926.73	9867.52	16262	4266.26	4222.13	4179.91	4422.48	8682.11	4846.89	4917.14	5077.91	4630.16	12094.1	4623.98	12929.5	10499	4104.82	9115.5	4190.15	7871.1	4860.5	5036.22	4568.34	8739.34	5371.91	4807.81	4435.8	5004.17	4134.55	4356.5	5519.48	4558.86	4090.22	4166.24	4357.73	4732.45	5654.91	4682.68	7194.66	5650.79	4553.13
ENSG00000198763_MT-ND2	1020.31	1094.64	1173.46	4358.94	4697.82	4553.66	4681.97	3607.45	4063.51	4640.48	3781.97	4992.73	4705.54	4439.88	5006.48	4070.03	4058.89	4337.57	4282.67	4698.43	3939.79	4430.02	4641.82	4279.34	4888.54	4497.55	4383.61	4876.63	4071.36	4114.75	4137.7	3997.53	3933.39	3907.29	4922.4	4373.5	4318.91	4244.23	4771.41	4444.28	5252.06	4392.24	4226.14	3828.95	4650.12	5234.73	4110.94
ENSG00000161016_RPL8	1001.21	1074.22	1126.11	4504.52	4577.26	4497.05	4394.68	4226.35	4504.15	4455.34	3690.77	3655.51	4013.09	4353.62	4002.07	3979.25	4645.39	4225.49	4453.54	4233.42	4290.69	4555.08	4200.36	4042.73	3795.47	4326.81	4303.07	3817.07	5029.26	4555.09	4310.73	4337.17	4802.42	4356.24	3706.25	3821.25	4852.3	4265.56	3926.49	3687.21	4037.44	4133.52	4212.96	4676.45	4575.22	3890.34	4677.18
ENSG00000100316_RPL3	933.792	1003.01	1033.05	4088.27	4398.59	4105.85	4258.78	3820.03	3884.99	4140.96	3513.03	3646.3	3701.65	4061.11	3841.92	3939	4346.17	4014.98	4101.3	4047.43	3886.66	3885.5	3897.3	3899.69	3604.49	4302.14	4028.87	3619.17	4664.48	4054.03	4172.91	4053.35	4297.42	4237.27	3636.39	3694.83	4499.17	3842.16	3706.88	3652.06	3626.53	4016.1	4037.1	3937.66	4009.09	3395.42	4401.15
ENSG00000198888_MT-ND1	900.087	1000.41	1064.87	3914.09	3463.02	3955.94	3743.63	4151.19	4350.69	3996.53	3229.43	3985.34	3858.82	4518.89	4022.53	4268.67	2985.85	4479.46	4231.86	4048.62	4557	4638.12	4073.96	4594.08	3846.49	4327.42	3394.44	3979.43	3005.43	4364.28	3288.4	4049.54	4052.75	3250.25	3839.93	3470.93	3236.75	4006.76	3807.69	3703.34	4142.69	4350.78	3566.02	4105.8	4394.04	4186.93	3311.79
ENSG00000111640_GAPDH	935.871	985.001	1052.42	4289.07	3775.45	4243.18	4742.86	3903.74	3579.97	4350.5	3347.74	3929.24	3914.69	3932.49	4225.34	4036.8	4283.73	3875.95	3644.61	4068.78	4188.93	3947.52	3747.33	4297.06	3831.75	4127.84	4302.69	4080.98	3720.76	4216.59	4161.02	3742.2	4118.21	4917.08	3977.97	3592.98	3979.09	3696.69	3856.25	3606.57	4137.91	3921.45	4337.71	3665.82	3756.55	3643.55	3660.54
ENSG00000148303_RPL7A	938.651	975.294	1017.27	4075.1	3888.17	4036.56	4213.55	3774.57	3822.99	4057.51	3702.83	3763.81	3761.72	3869.8	3752.23	4072.93	4326.06	3992.45	3735.85	4001.79	3799.71	3862.76	3874.25	3705.83	3513.98	4002.38	4033.39	3641.1	4141.63	3961.38	4218.04	3947.62	4321.46	4315.36	3714.82	3895.1	4383.45	3978.72	3286.34	3629.22	3698.12	3907.24	4150.8	3957.34	3882.84	3604.99	4213.05
ENSG00000142541_RPL13A	904.142	953.017	998.631	4056.09	4131.32	4057.63	4469.55	3645.03	3614.02	3903.13	3359.3	3565.17	3804.25	3997.69	3819.88	4235.35	3918.2	3955.33	3570.16	3631.72	3945.44	3624.2	3482	3928.2	3646.3	3643.83	4168.54	3527.32	4116.09	3853.39	3985.03	3736.71	4493.61	4002.68	3827.76	3682.31	3832.42	3517.89	3522.01	3666.95	3538.31	3590.57	3794.52	4078.63	3537.37	3642.87	3976.53
ENSG00000229117_RPL41	912.571	938.989	979.786	4001.75	3755.34	3924.57	4116.86	3789.88	3594.57	3898.24	3641.14	3619	3774.51	4089.6	3645.98	3756.34	4229.69	3753.18	3585.68	3866.56	3872.9	3718.93	3607.82	3755.57	3510.86	3788.8	3973.7	3647.78	3900.61	3966.59	4106.72	3671.32	4066.74	4343.44	3445.87	3689.64	3874.87	3736.48	3450.89	3526.17	3712.8	3657.78	4271.12	3773.1	3752.02	3672.06	3902.88
ENSG00000231500_RPS18	861.201	918.525	954.358	3795.85	3675.02	3808.95	3550.7	3453.4	3689.84	3755.78	3589.57	3674.26	4089.24	3415.64	3823.89	3359.4	4086.5	3405.23	3641	3917	3140.78	3134.43	3688.57	3286.37	3695.52	3670.1	3644.53	3608.75	4253.72	3312.16	4125.66	3442.3	4310.24	3820.26	3731.45	3452.31	4108.31	3847.77	3673.94	3422.89	3371.75	3311.31	3601.56	3501.04	3869.93	3726.78	3706.89
ENSG00000254772_EEF1G	844.574	882.359	919.592	3597.84	3687.68	2898.31	3985.45	3228.73	3143.11	3684.22	3177.52	3251.6	3668.13	3125.6	3517.87	3352.17	3672.95	3730.42	3541.46	2604.18	3370.85	3480.02	3500.89	3400.65	3535.1	3520.62	3528.38	3518.31	3844.62	3469.69	3671.75	3684.63	3814.8	3702.83	3314.35	3520.55	3889.84	3559.75	3680.17	3597.44	3662.32	3530.49	3667.7	3731.83	3181.04	3441.02	3402.3
ENSG00000229807_XIST	779.897	879.022	972.796	3127.93	4020.66	3341.22	4091.56	2762.55	2119.29	3849.47	3474.31	4143.03	3597.16	2954.23	4030.12	4000.33	2820.65	3580.75	3208.24	3970.38	2786.63	3043.21	3527.5	2956.23	3431.53	2854.82	3465.98	3573.77	2853.83	3116.81	3620.93	3460.41	2276.7	3854.03	4285.23	3660.46	3291.1	3402.63	4223.17	4276.59	3944.87	3337.44	3903.57	3609.36	3585.17	3826.22	3504.67
ENSG00000142937_RPS8	823.277	860.621	906.128	3704.59	3282.54	3549.01	3461.58	3204.91	3045.88	3437.39	3336.67	3450.22	3521.8	3228.85	3499.12	3375.66	4135.86	3378.32	3148.85	3639.16	3219.7	3121.31	3476.28	3102.12	3322.74	3651.69	3847.06	3447.57	3580.58	3202.74	3859.28	3559.02	3774.73	3831.5	3365.66	3462.53	3870.81	3449.04	3415.34	3317.51	3418.3	3363.65	3765.96	3266.12	3414.49	3284.97	3699.43
ENSG00000198786_MT-ND5	791.498	852.516	928.129	3554.11	3201.53	3719.9	3491.57	2664.2	2518.83	3849.9	2939.96	3893.57	3483.47	3075.26	4030.17	3606.47	3070.27	3690.35	3000.26	3623.66	2857.68	3154.74	3829.98	3351.05	3863.27	3262.43	3408.11	4020.21	2717.05	3215.65	3199.74	3396.67	2792.53	3412.02	3686.12	3202.33	3213.66	3567.97	3736.15	3481.93	4116.88	3761.16	3518.41	3143.46	3406.78	4151	3215.08
ENSG00000161970_RPL26	767.666	821.225	891.025	3733.33	3218.43	3448.09	3657.71	3133.08	2605.02	3560.99	3651.22	3418.06	3530.8	2929.95	3223.72	3026.86	3749.78	3371.94	2820.22	3612.42	2854.15	2785.57	3343.62	2947.46	3296.09	2952.37	3726.71	3273.71	3409.03	3063.25	3542.51	3066.3	3593.14	3742.31	3230.77	3705.45	3565.14	3407.42	3182.69	3193.62	3271.73	3083.76	3543.97	2791.22	3192.19	3217.73	3645.65
ENSG00000089157_RPLP0	768.793	823.944	855.069	3405.93	3171.85	3268.29	3375.11	3066.28	2892.11	3298.06	2952.6	3207.39	3039.4	3105.44	3314.6	3435.26	3569.6	3549.58	3068.9	3492.47	3284.27	2975.9	3377.4	2991.32	3221.21	3667.91	3027.93	3297.95	3066.12	3427.91	3293.61	3289.3	3419.19	3515.52	3541.22	2864.29	3142.56	3093.98	3500.55	3551.25	3366.43	3304.35	3402.19	3125.09	3420.64	2981.59	3320.49
ENSG00000122406_RPL5	790.764	814.003	834.707	3444.22	2948.86	3389.89	3022.63	2893.86	2833.44	3260.22	3510.13	3256.18	3415.82	3065.58	3339.69	3368.69	3469.21	3339.59	2925.95	3336.55	3019.71	2976.84	3325.05	3013.75	3230.65	3183.64	3215.62	3240.85	3089.18	3187.19	3296	3211.09	3419.18	3257.74	3202.97	3528.14	3321.06	3305.1	3263.48	3251.49	3407.21	3255.84	3209.69	3156.2	3185.21	3307.26	3335.66
ENSG00000198918_RPL39	733.563	803.336	846.062	3011.41	2703.79	3284.73	3390.64	2772.64	2564.84	3095.95	3448.66	3365.07	3442.92	3138.1	3355.41	2940.64	3794.91	2924.74	2909.52	3253.99	2881.06	2828.56	2881.68	3042.97	3234.62	3289.79	3182.76	3289.16	3348.53	3131.49	3622.35	2886.64	3342.05	3716.54	3192.07	3557.72	3551.46	2932.12	3348.23	3235.65	3438.29	2916.52	3484.51	2948.36	3054.84	3081.16	3593.37
ENSG00000198034_RPS4X	763.972	794.313	822.607	3328.66	2959.91	3341.54	3398.82	2829.95	2791.91	3286.41	3107.27	3256.94	3446.65	3041.15	3327.46	3167.98	3187.88	3165.21	2886.49	3340.06	2974.55	3039.88	3194	3186.52	3243.69	3054.29	3279.39	3295.43	2924.62	3186.83	3075.92	3042.66	3328.56	3330.21	3248.31	3291.77	3164.15	3155.86	3219.69	3076.46	3371.78	3123.88	3158.86	3060.67	3054.13	3272.4	3065.97
ENSG00000142534_RPS11	758.825	773.401	792.462	3072.81	3104.77	3171.28	3117.81	3035.3	3093.45	3124.59	2963.79	3004.52	3117.36	2980.48	3190.21	3170.83	3388.77	3140.13	2957.7	3071.68	3072.57	3093.76	2998.88	2821.62	3042.86	2898.11	3166.91	3059.04	3093.85	3015.55	3110.73	3133.67	3352.81	3348.59	3085.82	3058.41	3228.87	3231.74	3062.12	3072.61	2967.94	3035.3	3415.69	3249.16	2923.2	3153.25	3185.13
ENSG00000198840_MT-ND3	718.221	765.178	799.545	3075.31	2962.19	3037.41	3063.75	3244.79	3219.85	3046.53	2609.3	2961.76	3244.02	3453.18	2979.91	2666.46	3109.72	3057.67	3196.22	3198.83	3078.15	3176.96	3134.91	3265.61	3147.18	3346.1	3184.44	3112.5	2834.03	3200.15	2842.97	2802.58	2926.57	2619.77	2818.92	2773.62	3030.57	3271.51	2995.22	2824.78	3192.76	2854.99	2951.5	2766.17	3714.84	3263.01	3010.88
ENSG00000138326_RPS24	719.87	752.027	785.862	3276.31	2731.66	3239.71	3093.14	2666.73	2684.79	3143.55	3160.53	2978.69	3143.15	2916.42	3056.43	2880	3289.29	2992.07	2661.96	3084.79	2665.96	2802.36	3065.02	2717.55	2921.92	2971.39	3363.9	2975.3	2923.87	2934.28	3192.58	2863.93	3138.82	3215.65	3024.15	3376.35	3186.36	3033.34	2879.31	2760.28	2924.93	2885	3279.45	2778.99	3103.1	3081.84	3111.13
ENSG00000167658_EEF2	699.939	750.222	808.228	3226.03	3555.73	3223.03	3093.22	2798.22	3198.31	3322.98	2496.63	2804.37	2731.95	3010.79	2954.74	3301.94	2973.6	3234.21	3270.11	3138.81	2986.93	3103.99	3204.69	2859.81	2740.5	3108.71	2850.24	2763.74	3807.05	2924.61	2990.98	3424.47	3419.1	2892.31	2732.52	2644.22	3229.01	3329.87	2786.98	2903.95	2777.78	3350.56	2796.52	3435.5	2990.33	2693.53	3208.24
ENSG00000182774_RPS17	706.932	742.929	769.001	3029.88	2844.03	2608.49	3183.09	2986.92	2703.39	2966.21	2747.09	3039.13	3211.4	2871.71	2802.58	3089.42	3497.31	2807.16	2584.59	2686.87	2891.89	3089.6	3020.17	2822.3	3075.21	3214.15	2943.35	3022.56	3071.99	2934.2	3226.82	2904.77	2977.22	3461.02	3064.71	2872.55	3076.27	3213.45	2818.2	3026.64	2811.68	2959.05	2735.13	2912.21	2879.56	3023.55	3361.75
ENSG00000168028_RPSA	712.493	735.838	757.612	2888.67	2809.81	2891.27	3102.44	2805.06	2723.41	2887.7	2764.71	2964.39	2959.44	2829.57	3046.76	3147.03	3353.08	3039.39	2814.46	2867.75	2956.71	2859.69	2861.63	2867.42	2825.56	2931.4	2960.16	2857.1	2955.3	2973.41	3160.18	2773.82	3307.22	3220.72	2902.01	2956.45	3049	2720.81	2956.14	3003.63	3127.7	2976.55	2995.32	2923.01	2847.59	2792.09	3078.26
ENSG00000174444_RPL4	675.069	738.562	799	3485.8	2599.36	3382.64	2949.19	3071	3018.07	2959.31	2624.62	2963.95	2923.67	3098.1	3378.63	2649.26	3735.18	2972.57	3133.14	2665.53	3098.69	2566.69	2592.39	3141.78	2802.58	3200.45	3767.85	2773.23	3441.76	3115.75	3346.39	2532.27	2622.79	2861.87	2726.68	2943.19	2737.32	2751.72	2910.28	2691.48	2839.76	2531.55	3497.9	3182.63	3249.15	2656.9	3443.91
ENSG00000177954_RPS27	696.183	733.721	764.636	3129.14	2706.27	3019.56	3047.08	2693.95	2627.07	3082.55	2938.14	2931.63	2964.55	2784.59	2989.9	2900.47	3171.27	2906.96	2603.55	3099.63	2726.15	2685.43	3011.96	2722.88	2982.91	2703.78	3012.98	3095.33	2823.9	2766.5	2927.08	2729.96	3255.56	2995.19	2872.95	3105.71	2947.22	3062.37	2900.38	2811.56	3068.75	2919.38	3089.85	2920.63	2785.17	3384.64	3001.79
ENSG00000145425_RPS3A	662.062	698.781	734.222	2906	2598.13	2925.04	2940.83	2482.97	2389.91	2749.81	3116.96	2842.73	3046.11	2729.29	2849.71	2846.84	3289.22	2791.7	2422.93	2998.53	2598.18	2545.97	2738.02	2577.67	2697.74	2816.09	2906	2736.55	2732.21	2838.61	3046.65	2621.94	3046.31	3088.38	2760.48	3289.71	2943.73	2613.88	2888.86	2789.02	2798.55	2748	2798.84	2631.75	2788.97	2562.06	2980.11
ENSG00000147403_RPL10	669.588	696.582	723.125	2801.14	2682.07	2726	2899.72	2927.84	2700.63	2767.26	2549.47	2725.42	2791.31	2925.62	2802.04	2655.01	3104.85	2708.92	2874.86	2784.97	2902.98	2787.69	2616.23	2896.1	2649.42	2942.04	2828.84	2872.91	2964.78	2948.76	2863.34	2589.68	2966.02	2708.77	2677.11	2603.81	2909.24	2634.05	2762.42	2714.39	2740.23	2635.48	2648.52	2881.68	2808.21	2537.59	2825.31
ENSG00000063177_RPL18	652.904	687.249	720.689	3014.16	2884.93	2846.23	2967.06	2721.38	2808.83	2871.72	2318.12	2638.09	2602.75	2644.49	2750.25	2720.37	2989.94	2801.33	2688.15	2943.6	2621.52	2611.35	2633.25	2561.49	2553.56	2769.76	2928.94	2612.41	3278.02	2676.84	2928.89	2897.85	3178.3	2906.15	2438.42	2383.86	2747.74	2846.35	2595.79	2643.89	2538.15	2788.4	2833.14	2876.23	2569.91	2474.13	2871.75
ENSG00000162244_RPL29	641.924	671.265	702.137	2793.65	2567.68	2784.66	2731.86	2564.77	2435.87	2871.13	2449.32	2616.69	2540.91	2567.74	2748.22	2809.33	3103.69	2740.85	2520.88	2791.41	2559.49	2644.21	2672.17	2561.31	2512.91	2643.72	2891.51	2617.25	2947.67	2632.75	2978.88	2697.95	3039.91	2992.55	2615.8	2557.1	2840.74	2782.83	2541.06	2603.17	2721.77	2736.82	2972.64	2806.19	2630.22	2633.95	2924.26
ENSG00000240972_MIF	622.565	666.309	701.555	2806.94	2550.01	2739.52	2938.99	3114.1	2807.96	2859.39	1855.99	2551.86	2461.38	2971.57	2591.03	2644.61	2576.97	2716.39	2794.7	2768.8	2998.35	2804.05	2463.35	3062.62	2468.18	2452.34	2621.68	2642.79	2705	2857.23	2492.38	2678.47	2973.56	2732.86	2478.67	1949.18	2449.89	2729.23	2452.87	2652.01	2509.71	2728.51	2693.63	2904.13	2489.55	2502.59	2339.11
ENSG00000131469_RPL27	631.989	667.04	693.395	2727.32	2472.67	2703.41	2826.86	2517.71	2453.22	2777.05	2715.1	2773.97	2858.62	2475.45	2921.87	2491.65	2775.01	2632.81	2487.95	2822.78	2437.33	2537.61	2628.17	2585.75	2803.88	2409.88	2772.42	2753.15	2746.05	2425.14	2635.68	2672.23	2951.88	2664.09	2652.18	2801.18	2557.35	2697.47	2742.31	2648.24	2771.86	2599.88	2662.67	2672.96	2407.41	2893.71	2524.74
ENSG00000142676_RPL11	616.126	644.909	685.14	2740.22	2605.78	2590.79	2740.67	2363.71	2270.22	2771.48	2466.68	2542.94	2543.96	2370.7	2475.47	2687.2	2824.59	2636.47	2339.68	2746.02	2446.13	2410.58	2503.8	2304.26	2381.89	2645.48	2921.08	2501.82	2802.62	2583.87	2769.08	2634.08	2844.91	2956.42	2513.59	2575.41	2971.31	2647.02	2416.73	2463.78	2623.23	2500.86	2894.55	2572.63	2545.25	2438.95	2732.81
ENSG00000089009_RPL6	626.537	646.704	660.56	2552.88	2315.41	2686.06	2527.63	2405.51	2311.09	2522.16	2959.45	2506.11	2601.3	2581.79	2643.25	2812.33	2689.62	2590.28	2459.35	2746.27	2476.09	2451.3	2625.07	2415.33	2607.03	2442.25	2557.57	2631.56	2548.65	2668.66	2584.26	2524.15	2808.11	2717.49	2639.22	2944.54	2552.27	2486.86	2506.27	2678.45	2607.63	2637.45	2580.06	2633.34	2623.52	2589.38	2475.1
ENSG00000197958_RPL12	621.284	641.78	665.804	2760.91	2391.53	2625.62	2769.71	2288.36	2251.48	2803.5	2311.35	2529.87	2674.01	2484.59	2593.71	2630.83	2772.42	2594.27	2359.34	2730.88	2283.98	2433.1	2607.77	2423.52	2422.18	2555.26	2701.81	2519.68	2577.13	2529.91	2588.43	2562.36	2825.62	2750.76	2553.95	2554.52	2775.96	2571.88	2498.65	2394.24	2592.11	2604.57	2678.74	2550.78	2486.76	2513.39	2598.81
ENSG00000137154_RPS6	609.318	631.54	652.3	2691.04	2284.06	2639.69	2525.83	2251.26	2245.21	2647.12	2742.24	2535.73	2792.08	2414.18	2609.29	2519.01	2611.33	2530.93	2261.96	2652.75	2293.02	2354.17	2517.53	2332.64	2551.78	2431.49	2588.03	2563.07	2433.66	2489.96	2471.12	2502.35	2693.95	2558.27	2561.84	2805.86	2525.21	2563.03	2516.81	2448.11	2608.94	2544.15	2526.49	2454.7	2409.59	2611.9	2468.9
ENSG00000149273_RPS3	591.508	622.348	656.439	2461.14	2691.65	2612.28	2629.63	2255.85	2551.61	2728.44	2292.55	2273.16	2572.08	2557.62	2321.6	2653.99	2844.3	2489.61	2538.6	2491.77	2389.61	2405.09	2403.94	2407.65	2138.55	2730.38	2580.1	2232.5	2959.64	2489.17	2656.92	2614.12	2865.87	2534.21	2155.31	2268.09	2717.07	2438.62	2378.62	2285.15	2480	2470.31	2475.93	2534.22	2361.84	2269.3	2774.01
ENSG00000170315_UBB	587.176	599.918	623.222	2337.63	2299.4	2274.55	2494.58	2472.12	2438.57	2354.11	2369.97	2396.15	2479.56	2452.27	2398.2	2506.09	2535.94	2500.14	2333.29	2301.6	2496.91	2491.91	2260.88	2461.91	2304.85	2396.63	2365.27	2207.3	2428.22	2513.91	2472.78	2421.65	2627.78	2566.26	2343.56	2401.15	2369.79	2379.62	2364.53	2397.94	2286.94	2455.79	2525.72	2565.67	2346.9	2374.27	2493.22
ENSG00000105193_RPS16	580.12	598.875	620.165	2395.83	2380.92	2286.91	2569.14	2345.62	2355.68	2472.04	2343.27	2379.7	2483.53	2259.52	2467.67	2434.82	2638.34	2442.06	2395.18	2317.22	2331.9	2268.02	2350.15	2287.11	2445.73	2466.26	2500.83	2295.87	2713.21	2235.58	2513.76	2531.55	2741.17	1549.24	2402.02	2400.81	2573.55	2242.98	2255.86	2330.26	2379.58	2449.04	2489.51	2500.95	2241.69	2352.98	2423.54
ENSG00000136942_RPL35	543.13	581.739	599.867	2529.57	2458.48	2281.79	2346.49	2315.93	2375.36	2381.57	2016.65	2111.15	1961.73	2285.49	2311.5	2340.2	2488.14	2455.27	2208.83	2403.52	2296.21	2267.11	2371.84	2096.91	2087.68	2240.42	2429.09	2144.49	2518.67	2352.07	2348.18	2324.02	2480.75	2362.32	2127.98	2091.95	2387.3	2422.34	1909.4	2128.74	2221.05	2347.84	2497.17	2451.83	2296.39	2160.42	2329.89
ENSG00000112306_RPS12	545.209	577.419	606.096	2205.39	2150.73	2139.68	2515.31	2373.73	2094.63	2176.54	2279.73	2427.2	2574.55	2310.09	2445.53	2070.35	2546.29	2147.03	2220.74	2307.86	2162.18	2212.01	2133.75	2349.57	2323.85	2309.27	2484.61	2451.14	2385.45	2393.65	2311.58	2161.45	2449.61	2347.49	2458.29	2415.93	2372.42	2054.49	2434.79	2395.63	2452.66	2093.92	2193.94	2226.16	2219.57	2193.72	2302.95
ENSG00000074800_ENO1	528.539	557.699	591.609	2414.57	1952.66	2399.67	2400.26	2341.57	2124.36	2435.99	2066.31	2253.4	2267.01	2293.95	2432.12	2247.91	2160.31	2185.57	2161.67	2325.59	2505.36	2236.87	2150.94	2410.75	2218.86	2371.17	2039.29	2411.56	1922.89	2449.34	2121.37	2247.85	2352.24	2411.91	2274.22	2109.81	2023.36	2089.47	2224.72	2179.97	2329.94	2209.44	2101.36	2205.53	2111.75	2001.39	1895.57
ENSG00000105640_RPL18A	514.386	546.886	582.883	2430.61	2183.03	2049.57	2474.94	2361.76	2084.94	2297.11	1819.57	1995.91	1915.52	2297.48	2115.33	2000.24	2517.82	2221.14	2051.53	2129.46	2194.51	2227	2075.58	2203.55	1943.29	2118.43	2423.6	2160.29	2542.14	2036.06	2449.01	2306.45	2720.5	2122.47	1726.52	1937.61	2224.46	2339.89	2172.84	2203.7	2099.62	2222.4	2408.36	2397.55	1977.81	2186.34	2188.75
ENSG00000241343_RPL36A	505.822	535.082	559.366	2357.15	2002.88	2295.64	2177.18	2034.22	1936.27	2132.75	2147.35	2096.87	2364.24	2082.99	2258.94	1978.3	2338.7	2046.98	1913.46	2265.77	1937.69	1965.08	2162.92	1917.42	2209.49	2022.03	2271.45	2133.31	2156.66	2156.87	2038.41	2087.56	2233.32	2238.84	2309.43	2380.24	2275.96	2027.05	2188.26	2001.38	2169.96	1939.68	2190.18	1967.67	2097.4	2092.55	2153.66
ENSG00000198755_RPL10A	509.794	520.719	535.191	2092.3	2032.91	2069.63	2213.37	2039	1973.23	2129.88	2024	2128.28	2171.24	2075.99	2158.33	2085.67	2256.94	2084.45	2012.08	2135.67	2030.75	2060.85	2031.66	2092.94	2019.85	2175.34	2143.96	2077.79	2142.55	2054.07	2039.71	2051	2265.61	2167.5	2069.16	2145.24	2130.5	1998.02	2034.89	2031.46	2142.46	2065.26	2134.02	2081.3	2126.18	2044.08	2100.49
ENSG00000248527_MTATP6P1	471.351	518.707	558.391	2153.5	1917.52	2069.86	2094.5	2094.65	2362.78	2188.66	1723.83	2230.13	2341.81	1995.81	2211.9	1835.07	1739.71	2059.81	2079.8	2234.71	2004.13	2112.52	2293.7	1958.17	2446.55	1900.19	1917.73	2327	1845.74	1856.4	1644.35	2290.71	2157.38	1495.27	2274.93	1803.02	1837.33	2387.34	2260.84	1947.78	2131.49	2039.07	1844.99	2109.66	1929.86	2660.57	1880.48
ENSG00000184009_ACTG1	484.212	507.184	524.909	2116.39	1936.79	2120.44	1995.91	2098.74	2031.24	2185.91	1846.97	2046.12	1953.37	2063.08	2044.77	2138.73	1896.67	2050.38	1907.5	2036.73	2069.11	2207.34	1937.03	2193.02	1935.94	2026.24	1855.12	2172.48	1968.34	2099.93	1912.61	2052.23	2145.34	1962.53	1951.83	1849.78	1867.83	1897.24	2019.31	2045.25	2046.38	2170.76	1941.15	2144.23	1954.26	1967.87	1822.01
ENSG00000177600_RPLP2	490.229	504.423	524.447	2037.4	1972.78	1972.25	2145.19	2246.07	2053.31	2000.69	1790.73	2017.57	2085.61	2043.88	2017.81	1851.26	2334.71	1950.51	2011.93	2066.49	1959.36	1917.36	1873.51	2027.15	1951.4	2101.85	2122.71	1970.46	2187.07	1955.6	2114.57	1999.6	2242.47	2143.84	2033.62	1853.05	2233.74	1965.58	2052.12	1978.13	1993.34	1911.31	2065.52	2029.78	1994.46	1923.13	2193.42
ENSG00000118181_RPS25	467.204	503.439	531.084	2001.79	1888.31	2021.79	2195.08	1861.04	1713.25	2018.13	2077.01	2040.48	2251.18	1902.98	2126.25	1811.55	2351.41	1756.25	1813.97	2065.25	1787.54	1811.67	1939.44	1840.7	2009.38	2082.7	2270.67	2009.16	2189.2	1920.12	2138.35	1862.32	2006.46	2261.87	2105.56	2187.2	2211.3	1933.94	2041.4	1921.92	2066.92	1765.42	2118.61	1819.09	1993.06	2049.66	2207.86
ENSG00000265681_RPL17	479.502	497.978	521.451	1985.52	1914.26	2093	2153.86	1704.47	1716.98	2104.98	2190.94	2115.02	2035.62	1969.51	2060	2159.81	2189.1	1991.32	1854.06	1977.93	1898.69	1906.8	1900.6	1965.11	1929.23	1954.46	2024.86	1995.35	2043	1951.03	2046.91	1844.89	2148.26	2102.26	1992.5	2196.42	2166.26	1896.38	2057.55	2018.7	1949.96	1889.77	2043.3	1964.88	1860.49	1962.45	2064.23
ENSG00000198242_RPL23A	474.33	484.682	506.036	1956.23	1895.41	1952.02	2024.15	1965.02	1863.85	2029.66	1936.35	1950.13	1914.17	1926.91	1913.7	2000.69	2147.8	1903.04	1867.5	1935.66	1893.02	1883.52	1858.56	1884.44	1821.36	1959.91	2131.81	1903.82	2042.98	1941.1	2077.46	1997.12	2109.31	2157.97	1944.98	2069.32	2101.7	1932.45	1883.84	1852.31	1893.22	1917.98	2167.96	1918.13	1978.44	1908.03	2024.11
ENSG00000163682_RPL9	452.995	481.688	513.806	1950.14	1821.84	1973.54	1947.63	1788.61	1745.69	1794.73	2092.13	2013.03	2195.02	1981.59	2046.68	1781.91	2310.88	1881.64	1753.57	1890.23	1808.69	1773.38	1829.94	1878.04	2057.63	2000.95	2075.11	1857.19	2021.39	1927.22	2178.34	1768.81	2074.36	2271.87	1926.28	2165.33	2137.26	1822.5	1985.18	1749.56	1822.1	1793.42	2048	1791.89	1876.36	1869.86	2130.74
ENSG00000114391_RPL24	433.987	458.43	474.556	1807.41	1651.91	1735.18	1997.92	1774.47	1621.43	1827.84	2035.64	1882.38	2067.21	1759.98	1925.74	1776.62	2058.46	1811.21	1681.44	1901.94	1697.65	1694.25	1615.39	1686.41	1872.75	1823.23	1846.57	1868.41	1861.99	1767.67	1879.19	1822.02	1887.06	1982.25	1839.6	2056.12	1880.37	1703.22	1814.95	1913.74	1858.18	1738.27	1944.01	1701.75	1695.61	1862.1	1940.05
ENSG00000171863_RPS7	430.804	458.14	495.093	2086.71	1617.63	2008.39	1687.1	1667.54	1632.92	1970.39	2067.05	2048.85	1956.2	1762.34	2073.56	1760.02	1971.94	1861.47	1608.18	2105.9	1692.99	1818.91	1829.04	1737.26	1857.06	1692.37	1827.48	2085.1	1721.72	1680.54	1717.76	1737.22	1836.08	1727.69	1873	2052.69	1786.89	1873.57	1962.31	1983.19	2069.78	1799	1640.55	1906.26	1765.19	2110.6	1858.47
ENSG00000108298_RPL19	431.136	450.069	473.218	1901.75	1748.54	1892.63	1847.06	1770.04	1730.17	1863.82	1729.26	1691.45	1703.22	1735.78	1742.06	1803.19	1905.62	1965.62	1714.23	2062.2	1700.19	1745.17	1840.25	1753.44	1692.6	1783.57	1879.74	1700.32	2076.83	1815.04	1905.09	1832.2	1994.58	1898.09	1696.92	1722.97	2041.3	1797.37	1824.08	1671.65	1683.96	1837.87	1896.94	1892.95	1789.63	1713.53	1876.29
ENSG00000210144_MT-TY	413.106	450.018	488.359	1713.02	1688.37	1707.22	1844.34	1851.72	1544.54	1802.05	1650.1	1983.97	1821.1	2006.61	1931.15	1869.42	1492.93	1798.1	1961.11	1561.98	2132.76	2036.6	1728.05	2296.42	1816.59	2054.46	1648.68	1822.92	1451.47	2277.32	1549.84	1654.85	1539.5	1749.59	1772.35	1651.61	1462.38	1816.68	1733.15	1795.92	1967.81	1912.13	1784.41	1802.81	2086.36	1960.87	1556.53
ENSG00000130255_RPL36	421.149	446.705	463.305	1843.27	1893.58	1798.44	1686.71	1931.09	1809.96	1806.54	1444.58	1674.36	1664.35	1820.45	1743.22	1623.02	1996.76	1690.42	1840.39	1856.54	1683.57	1701.02	1775.15	1698.12	1595.5	1858.44	2040.27	1687.21	2153.26	1703.65	1900.8	1833.46	1994.46	1842.57	1825.99	1502.38	2121.53	1798.03	1691.35	1673.35	1646.81	1683.89	1809.65	1775.61	1761.21	1630.84	2056.39
ENSG00000123416_TUBA1B	408.097	441.01	456.863	1820.43	1627.1	1792.53	1908.02	1818.46	1671.86	1761.47	1619.89	1775.58	1799.04	1544.78	1627.54	1860.58	1646.92	1831.65	1766.61	1810.08	1846.77	1843.69	1731.71	1919.3	1795.76	1829.93	1583.25	1874.89	1387.66	1867.86	1653.63	1685.06	1857.22	1703.29	1775.06	1613.79	1583.59	1738.34	1823.49	1717.9	1828.77	1806.55	1599.49	1613.41	1747.8	1755.98	1541.79
ENSG00000110700_RPS13	429.594	439.682	461.787	1749.91	1688.93	1743.96	1941.24	1735.27	1633.88	1740.91	1847.28	1848.08	1962.93	1750.94	1714.95	1743.1	1912.61	1767.23	1669.87	1592.02	1736.61	1704.06	1764.48	1762.41	1846.75	1762.49	1839.47	1851.34	1719.82	1779.63	1855.09	1709.47	1915.86	1818.22	1667.84	1900.9	1780.42	1667.87	1864.59	1856.4	1713.82	1783.02	1774.31	1742.53	1717.89	1737.77	1755.04
ENSG00000150991_UBC	389.227	433.285	452.728	1749.29	1486.9	1819.67	1496.17	1616.18	1811.72	1912.42	1719.3	1718.99	1816.29	1637.25	1845.26	1800.19	1788.9	1726.26	1493.9	1795.56	1749.31	1881.5	1808.5	1509.29	1743.68	1920.5	1577.52	1455.1	1290.25	1550.04	1603.64	1651.64	1489.24	1828.66	1828.34	1835.72	1724.3	1740.02	1745.31	1636.69	1763.19	1841.31	1780.63	1706.74	1538.41	1424.77	1541.77
ENSG00000124614_RPS10	419.284	436.382	456.143	1925.22	1741.45	1930	1649.48	1303.97	1718.81	1741.94	1512.93	1829.71	1790.18	1795.71	2086.91	1963.27	1861.64	1771.82	1749.12	1811.31	1802.08	1766.86	1675.77	1670.41	1495.56	1843.83	1586.89	1794.19	1884.56	1722.35	1878.55	1671.73	1828.39	1820.9	1713.59	1715.2	1825.8	1777.74	1685.65	1687.31	1650.67	1681.22	1757.09	1706	1694.77	1356.63	1585
ENSG00000237973_MTCO1P12	400.501	443.755	473.71	1789.41	1641.84	1769.55	1872.81	1780.49	1869.67	1823.57	1817.84	2042.72	2172.68	1665.54	1947.2	1413.12	1476.28	1544.93	1699.98	1807.14	1684.61	1752.08	1859.52	1704.46	2289.88	1580.5	1902.19	2250.46	1550.6	1605.76	1454.18	1789.31	1511.17	1359.4	2235.78	1821.16	1606.67	1993.59	2133.01	1839.17	1971.4	1600.75	1629.95	1671.63	1532.81	2338.65	1529.08
ENSG00000181163_NPM1	391.507	417.457	440.704	1754.23	1551.99	1736.18	1655.09	1464.35	1477.61	1890.06	1883.73	2341.48	1748.46	1550.27	1869.66	1838.91	2429.99	1616.07	1584.9	1777.65	1583.13	1557.75	1725.83	1543.42	1542.6	1702.69	2268.4	1630.55	1580.47	1654.89	1561.21	1729.2	1744.88	1648.77	1673.86	1986.11	1756.97	1497.58	1557.55	1596.01	1665.79	1746.71	1764.77	1479.72	1891.13	1620.55	1725.9
ENSG00000149925_ALDOA	315.804	411.457	433.836	1720.16	1057.42	1074.41	1806.08	1776.24	1625.69	1757.51	792.015	1684.94	1472.55	1666.9	1623.87	1206.94	1653.17	1744.7	1593.59	1725.59	1918.81	1653.98	902.405	1737.34	1765.53	1638.48	1504.21	1790.88	991.856	1632.32	1677.71	1568.49	1753.78	1802.35	1702.93	1398.3	1695.98	826.98	960.507	872.074	1615.87	1782.84	1729.35	1705.08	1366.49	898.064	1228.79
ENSG00000134333_LDHA	373.836	410.958	447.48	2010.36	1420.47	1640.2	1747.33	1337.49	1418.71	1513.04	1866.65	1739.95	1492.19	1443.14	1529.84	1367.41	1745.83	1602.02	1491.02	1904.04	1782.13	1605.54	1705.93	1818.32	1434.12	1760.13	1504.8	2004.29	1387.6	1827.31	1647.46	1769.71	1624.45	2080.68	1836.13	1854.07	1601.74	1579.57	1792.52	1692.55	1950.17	1374.06	1728	1526.54	1563.53	1745.51	1468.77
ENSG00000147604_RPL7	396.013	408.347	426.406	1646.93	1599.45	1706.8	1742.14	1462.15	1506.23	1601.18	1762.24	1648.26	1750.83	1575.54	1686.11	1639.91	1896.5	1626.5	1501.08	1652.02	1520.97	1563.5	1638.9	1523.17	1594.74	1702.1	1670.81	1581.04	1644.82	1621.05	1749.6	1593.09	1743.49	1822.55	1618.49	1816.12	1759.94	1563.65	1621.81	1627.87	1623.94	1624.75	1672.11	1559.71	1648.25	1574.22	1767.29
ENSG00000188846_RPL14	325.36	403.443	438.032	1262.54	1580.4	1418.14	1803.95	1452.87	1512.26	1003.83	1628.92	1760.79	2032.82	1576.3	1863.76	745.841	435.858	1579.47	1514.51	1667.23	1247.64	1420.33	1860.5	1532.38	1715.45	1646.24	1710.71	942.356	1799.5	753.441	1701.75	1791.58	448.041	1939.04	1702.64	577.984	1675.56	1728	1655.28	1513.78	2049.5	775.633	1685.77	1203.65	1598.63	1892.08	1760.17
ENSG00000174748_RPL15	355.507	395.815	436.052	1455.54	1390.46	1472.38	1603.6	2065.69	1391.95	1362.73	1889.5	1538.57	1635.21	2182.05	1658.39	1691.12	1706.31	1545.64	2077.68	1486.09	1370.6	1387.72	1547.67	1802.55	1442.94	1425.86	1416.86	1470.14	2382.6	1295.6	1621.28	1322.28	1585.49	1647.51	1754.16	2120.31	1638.89	1420.75	1709.58	1389.32	1714.34	1525.87	1853.7	1401.5	2172.61	1581.03	1790.61
ENSG00000182899_RPL35A	370.022	394.347	417.358	1525.8	1500.03	1480.8	1644.49	1660.56	1360.34	1383.72	1623.44	1583.65	1711.9	1629.4	1547.21	1382.37	1539.75	1307.44	1582.05	1576	1517.51	1578.77	1359.52	1625.36	1501.24	1749.53	1880.75	1316.66	1744.9	1479.85	1838.79	1464.48	1591.22	1672.39	1638.74	1707.24	1815.08	1444.1	1620.68	1453.96	1550.7	1505.39	1789.52	1460.9	1699.98	1549.13	1793.17
ENSG00000137818_RPLP1	377.773	391.847	405.936	1574.67	1509.02	1491.93	1746.06	1675.32	1560.11	1518.79	1405.22	1646.59	2418.03	1579.96	1623.75	1487.98	1705.13	1479.47	1516.74	1610.37	1483.24	1525.8	1462.36	1535.17	1598.24	1541.16	1633.07	1589.17	1616.93	1538.18	1590.41	1524.05	1707.36	1624	2137.35	1448.16	1595.69	1509.21	1632.58	1593.53	1623.73	1448.24	1545.32	1551.86	1490.41	1598.28	1532.12
ENSG00000209082_MT-TL1	368.806	391.793	440.845	1508.7	1348.84	1512.62	1581.12	1723.58	1669.03	1660.57	1382.03	1540.74	1492.12	1874.55	1745.47	1711.89	1350.8	1763.44	1878.23	1517.51	1850.16	1990.09	1510.86	2135.7	1700.56	1923.83	1480.47	1768.59	1206.95	1972.26	1358.85	1637.35	1432.04	1475.11	1574.55	1536.75	1475.55	1413.85	1478.56	1434.98	1785.6	1736.03	1450.42	1559.79	1864.9	1763.21	1366.34
ENSG00000115268_RPS15	355.805	382.914	408.995	1698.52	1706.05	1489.12	1520.02	1555.05	1794.24	1503.04	1216.31	1443.95	1375.41	1574.56	1458.07	1598.35	1636.75	1421.07	1678.55	1542.91	1668.47	1578.36	1576.14	1429.69	1354.98	1555.9	1574.04	1365.12	1950.02	1520.4	1695.38	1633.66	1718.66	1461.21	1357.85	1213.59	1694.32	1558.06	1379.82	1353.83	1293.18	1497.46	1488.81	1604.53	1458.44	1331.98	1771.86
ENSG00000167526_RPL13	354.214	384.91	437.642	1550.44	2016.98	1617.78	1969	1387.09	1562.24	1470.06	1216.45	1381.57	1438.05	1776.06	1263.38	1413.09	1796.16	1539.29	2045.56	1751.35	1520.91	1997.11	1541.59	1495.36	1218.41	1500.77	1707.58	1595.45	1944.13	1748.23	1380.63	1975.47	1708.79	1539.99	1352.22	1174.54	1834.44	1481.93	1351.01	1494.77	1428.17	1549.44	1475.97	1552.69	1476.8	1145.27	1910.78
ENSG00000135486_HNRNPA1	357.743	376.595	396.539	1576.85	1488.42	1556.81	1483.58	1459.37	1430.82	1541.98	1589.52	1376.47	1465.48	1516.73	1431.42	1636.03	1604.72	1496.03	1557.65	1432.29	1425.8	1586.01	1582.2	1527.68	1350.2	1609.06	1461.23	1441.25	1609.59	1671.23	1540.65	1617.05	1655.64	1596.33	1303.07	1304.67	1652.4	1184.76	1540.81	1484.28	1546.71	1297.67	1318.05	1315.44	1586.2	1355.83	1481.68
ENSG00000156482_RPL30	362.973	376.734	394.207	1455.71	1479.25	1477.86	1596.78	1456.91	1415.68	1426.35	1516.48	1566.93	1690.08	1457.03	1626.44	1376.78	1596.73	1459.7	1450.05	1510.9	1542.85	1412.68	1396.28	1450.62	1601.13	1461.1	1556.83	1595.54	1574.78	1488.44	1489.28	1393.53	1624.5	1544.57	1538.4	1663.96	1529.79	1413.24	1523.83	1640.99	1577.51	1398.39	1541.4	1502.97	1383.33	1592.66	1468.71
ENSG00000186468_RPS23	298.919	378.632	427.744	1662.34	1665.33	1639.63	1627.11	975.337	1503.88	1794.73	1056.14	1887.65	1784.16	1458.75	1224.05	1687.55	1328.07	1643.64	1230.79	1711.51	1002.9	1046.17	1186.3	1091.58	1324.15	1767.5	1757.1	1548.97	1734.54	1103.21	1842.03	1173.88	1805.9	1442.46	1709.38	1785.91	1223.8	1392.55	1251.53	1677.99	1063.98	1610.49	1818.48	1014.18	1075.87	1525.18	1251.29
ENSG00000111716_LDHB	356.653	366.57	378.298	1443.32	1332.67	1397.59	1383.09	1465.74	1402.08	1402.13	1711.24	1478.58	1534.22	1430.44	1466.82	1483.47	1589.73	1467.46	1448.48	1394.98	1478.87	1504.1	1392.47	1487.64	1454.45	1492.34	1392.09	1555.48	1426.21	1559.11	1542.69	1397.37	1528.7	1508.61	1439.6	1642.62	1431.16	1348.11	1476.45	1541.32	1523.85	1464.18	1427.8	1435.42	1499.96	1438.69	1514.72
ENSG00000196205_EEF1A1P5	343.654	363.514	397.081	1454.71	1351.19	1441.47	1603.14	1453.4	1393.62	1451.04	1628.34	1511.6	1753.34	1328.46	1536.29	1178.83	1748.77	1264.75	1379.5	1468.54	1264.2	1337.09	1427.01	1358.97	1647.23	1466.94	1711.99	1597.34	1561.28	1372.99	1493.84	1415.71	1365.37	1475.66	1675.52	1783.97	1664.35	1389.29	1653.75	1433.92	1509.21	1280.26	1434.44	1315.56	1417.37	1515.45	1529.04
ENSG00000143947_RPS27A	345.938	362.819	379.162	1433.85	1345.89	1401.18	1494.34	1483.11	1287.93	1391.46	1672.87	1482.87	1635.85	1445.4	1520.38	1322.98	1765.58	1385.8	1332.66	1448.13	1410.28	1332.66	1383.07	1396.51	1443.97	1528.41	1594.04	1505.44	1487.33	1462.07	1541.96	1346.54	1479.85	1549.33	1501.7	1681.17	1583.1	1296.07	1501.73	1425.56	1495.78	1345.76	1454.43	1341.49	1446.48	1323.91	1595.16
ENSG00000196230_TUBB	346.464	362.478	372.712	1569.28	1387.4	1528.93	1497.95	1364	1279.2	1534.88	1377.47	1479.64	1408.01	1369.85	1511.77	1513.33	1365.86	1494.35	1386.48	1453.65	1468.83	1454.35	1451.59	1503.95	1441.33	1480.34	1344.34	1515.93	1280.47	1479.43	1426.18	1385.65	1423.18	1495.99	1434.96	1373.44	1302.2	1453.24	1427.69	1467.79	1522.85	1474.43	1448.23	1438.64	1455.43	1439.29	1281.78
ENSG00000164587_RPS14	315.933	345.659	361.553	1400.79	1373.84	1457.97	1459.78	1276.75	1425.67	1388.68	1232.38	1271.95	1215.91	1510.95	1248.56	1253.7	1555.93	1423.65	1420.47	1376.59	1434.92	1286.47	1449.98	1389.78	1219.67	1419.17	1408.78	1309.49	1696.02	1333.69	1414.24	1274.05	1542.21	1463.24	1225.37	1230.75	1480.89	1308.81	1260.99	1166.69	1234.65	1275.79	1349.96	1420.39	1557.67	1170.78	1534.06
ENSG00000166165_CKB	276.098	333.93	371.127	1285.33	1712.78	1235.16	1387.04	1642.29	1768.95	1231.07	974.432	1054.42	1034.58	1604.1	1133.93	1259.28	1348.33	1281.49	1643.59	1206.11	1631.21	1561.18	1290.6	1443.21	1030.1	1491.58	1343.28	1094.54	1812.17	1581.05	1373.35	1430.37	1463.29	1338.41	1050.61	953.937	1460.03	1333.04	1045.42	1088.65	1067.6	1306.08	1329.55	1412.62	1386.18	1062.38	1580.43
ENSG00000083845_RPS5	321.435	337.506	348.133	1373.52	1329.79	1392.87	1453.5	1396.31	1357.86	1242.46	1100.87	1331.46	1394.94	1332.33	1425.46	1375.38	1425.64	1361.55	1428.6	1224.8	1423.92	1389.5	1301.83	1342.19	1248.16	1298.85	1331.28	1323.07	1382.61	1367.81	998.992	1405.82	1578.45	1413.13	1299.51	1201.93	1301	1255.07	1169.71	1391.5	1276.12	1374.78	1379.81	1387.15	1292.16	1240.69	1283.6
ENSG00000122026_RPL21	321.621	333.812	348.232	1353.43	1275.05	1382.4	1412.38	1190.34	1177.17	1395.2	1373.31	1256.66	1385.94	1305.25	1373.2	1380.49	1543.28	1370.24	1203.88	1345.76	1316.31	1288.84	1333.18	1245.15	1216.97	1391.64	1393.36	1311.13	1336.39	1323.83	1443.75	1271.37	1476.02	1519.53	1317.46	1429.07	1422.29	1304.89	1334.1	1305.83	1310.54	1279.12	1462.96	1214.01	1338.44	1285.7	1460.84
ENSG00000144713_RPL32	305.397	331.434	357	1325.87	1218.87	1331.91	1357.06	1223.6	1167.25	1325.6	1381.06	1605.05	1499.61	1442.74	1430.48	1234.83	1459.12	1344.9	1120.96	1320.05	1220.92	1103.45	1245.02	1167.73	1409.28	1094.07	1184.79	1274.88	1627.27	1332.39	1387.57	1377.18	1665.05	1350.88	1313.43	1217.33	1420.56	1738.94	1239.73	1760.79	1455.17	1238.16	1211.92	1239.02	1103.03	1233.69	1580.56
ENSG00000172809_RPL38	309.917	327.721	348.999	1328	1187.27	1305.16	1312.46	1278.96	1307.18	1372.62	1383.27	1117.12	1711.98	1232.51	1396.25	1053.97	1497.62	1162.25	1185.78	1391.31	1196.55	1204.99	1277.67	1276.64	1349.66	1137.75	1431.43	1538.73	1384.73	1219.74	1291.09	1284.54	1433.22	1309.31	1395.24	1454.74	1476.96	1265.6	1458.14	1321.51	1391.83	1261.13	1312.47	1035.38	1281.87	1562.11	1412.6
ENSG00000128272_ATF4	308.257	324.193	353.69	1359.65	1100.89	1424.93	1362.71	1340.34	1297.79	1457.64	1254.4	1280.32	1212.74	1414.09	1229.54	1429.14	1208.46	1442.7	1291.55	1429.03	1487.1	1427.61	1345.51	1450.81	1227.46	1371.24	1236.93	1402.22	1167.63	1453.71	1208.69	1245.69	1409.12	1180.95	1263.66	1276.42	1231.73	1406.41	1231.53	1295.75	1239	1338.88	1270.98	1414.98	1510.75	1269.71	1166.36
ENSG00000161960_EIF4A1	309.862	322.632	336.516	1299.8	1162.55	1292.02	1206.34	1393.91	1343.76	1311.2	1360.9	1300.87	1269.35	1346.83	1302.66	1347.11	1204.27	1291.19	1359.64	1279.4	1307.53	1371.94	1236.27	1387.37	1264.55	1417.28	1152.64	1363.17	1096.64	1420.98	1218.78	1278.95	1332.45	1224.17	1242.32	1276	1167.84	1251.29	1238.49	1289.87	1328.76	1310.66	1265.88	1269.02	1400.19	1247.73	1184.67
ENSG00000187514_PTMA	292.999	317.929	342.082	1272.61	1558.22	1281.54	1240.24	1457.09	1413.1	1290.42	1132	1157.4	1254.9	1460.21	1162.01	1164.15	1270.82	1189.86	1326.95	1230.68	1312.73	1299.45	1188.87	1368.33	1159.29	1456.05	1347.92	1217.54	1530.7	1478.99	1373.56	1255.64	1304.26	1387.99	1153.77	1131.18	1410.96	1247.76	1140.36	1159.62	1187.51	1251.12	1356.66	1166.82	1368.32	1130.88	1344.95
ENSG00000171858_RPS21	302.011	316.965	337.306	1244.04	1250.95	1183	1402.56	1538.98	1261.71	1206.72	1213.62	1217.44	1327.09	1311.98	1253.13	1084.44	1653.9	1180.82	1276.26	1289.22	1219.95	1200.11	1140.32	1202.62	1289.74	1356.88	1482.08	1333.88	1563.01	1255.11	1430.56	1236.58	1332.52	1417.6	1274.01	1176.01	1504.5	1155.11	1311.26	1274.68	1212.02	1119.32	1354.34	1258.85	1282.3	1190.21	1401.29
ENSG00000210151_MT-TS1	295.904	316.629	358.962	1504.34	1032.26	1493.65	1159.83	1251.41	1272.16	1557.17	1134.44	1260.87	1302.21	1157.12	1252.01	1552.94	1184.79	1563.77	1137.94	1543.84	1444.79	1219.02	1593.88	1076.85	1362.28	1300.2	1334.01	1229.16	1088.89	1126.61	1183.23	1318.75	1603.4	1249.39	1329.6	1256.51	1148.05	1597.98	1280.22	1129.96	1190.83	1561.29	1360.86	1365.53	1230.01	1409.03	1257.27
ENSG00000071082_RPL31	302.713	314.356	336.645	1274.42	1179.17	1207.64	1428.24	1298.97	1210.47	1149.84	1346.03	1302.27	1218.21	1279.5	1256.95	1162.2	1593.52	1222.05	1247.92	1248.05	1216.84	1218.43	1174.42	1211.99	1257.9	1346.76	1429.59	1247.17	1382.97	1254.2	1388.36	1162	1356.42	1378	1285.6	1337.38	1408.08	1135.96	1269.72	1277.52	1255.96	1178.81	1354.95	1198.45	1302.91	1190.26	1367.92
ENSG00000134419_RPS15A	281.791	298.335	320.374	1190.49	1011.25	1307.8	1119.87	1129.3	1074.12	1126.45	1221.08	1280.47	1297.92	1079.17	1280.48	1176.09	1186.02	1218.91	1044.47	1383.96	1019.25	1092.81	1177.48	1057.11	1254.2	1042.02	1151.41	1177.36	1156.84	1156.8	1311.68	1253.74	1232.08	1345.17	1592.8	1332.22	1132.81	1122.31	1387.06	1196.19	1233.19	1282.28	1281.61	1281.14	1184.42	1260	1668.62
ENSG00000145741_BTF3	278.371	290.815	305.206	1257.32	1062.64	1207.31	1135.19	1064.84	972.763	1247.2	1291.79	1193.91	1315.97	1111.5	1276.09	1146.07	1207.81	1156.61	983.66	1171.66	1053.41	1068.09	1168.22	1055.29	1249.42	1131.47	1161.86	1279.88	1071	1085.9	1121.46	1126.62	1203.12	1185.63	1227.13	1361.79	1151.48	1211.92	1167.39	1164.66	1223.79	1207.67	1121.89	1112.03	1146.61	1246.61	1117.84
ENSG00000075624_ACTB	257.513	287.616	316.632	1181	990.322	1135.08	972.259	1462.4	1269.62	1099.84	1096.38	1253.51	1020.12	1257.25	1150.73	1322.45	941.522	1245.06	1274.27	1150.2	1347.68	1336.73	1161.76	1292.05	1107.92	1101.6	878.377	1126.02	943.882	1283.42	858.609	1231.68	1288.14	915.038	1094.99	994.292	854.243	1154.66	1059.85	1219.28	1076.96	1293.29	1097.02	1314.33	1195.63	1215.65	887.476
ENSG00000005022_SLC25A5	265.409	272.326	279.562	1050.8	1023.15	1037.56	1119.23	1109.39	1055.49	1050.6	1093.53	1129.86	1120.27	1064.81	1155.25	1091.06	1161.96	1079.85	1072.61	1068.74	1108.55	1107.32	1022.21	1108.46	1092.89	1118.27	1041.01	1108.06	1075.54	1132.47	1148.02	1038.71	1094.43	1149.6	1086.41	1087.54	1080.65	996.549	1118.19	1136.45	1132.47	1074.28	1093.72	1060.04	1060.58	1086.15	1080.38
ENSG00000087460_GNAS	258.416	268.144	277.934	1091.12	1129.62	1088.08	1151.39	1071.11	1194.9	1027.7	1006.97	1053.92	913.866	1054.48	1122.03	1078.34	1046.14	1119.74	1129.46	1004.65	1049.07	1161.23	1051.97	1154.58	924.053	1019.54	1029.51	1035.06	1120.56	1147.37	1087.71	1018.84	1103.05	1033.2	1002.16	1051.16	1079.7	1113.43	1106.1	1090.89	1040.46	1074.04	958.623	1063.34	1106.67	1050.72	1085.48
ENSG00000096384_HSP90AB1	248.777	263.084	271.104	1076.53	937.527	1090.92	992.581	1061.67	970.107	1094.24	1149.25	1048.8	1058.84	1050.18	1082.94	1109.62	960.635	1055.38	1002.7	1064.3	1114.74	1068.64	1019.45	1092.24	1043.45	1131.68	934.226	1062.51	891.742	1126.04	989.312	1041.66	1079.11	1040.12	1052.04	1114.36	962.777	1013.69	1056.08	1052.63	1047.91	1084.91	992.232	1010.72	1094.41	991.059	943.063
ENSG00000166441_RPL27A	227.077	253.667	271.823	1228.99	907.06	1050.28	1214.59	1012.62	1020.4	1092.22	1016.71	924.971	887.286	929.567	1144.28	912.047	1065.71	952.635	844.279	1245.19	1002.13	927.554	1004.34	988.218	1045.03	949.961	1368.51	1061.73	807.612	993.706	1178.01	864.766	1100.58	1114.18	1115.42	1068.68	1184.77	1031.99	1018.11	830.965	1072.51	856.049	1067.89	900.199	863.227	827.402	869.778
ENSG00000008988_RPS20	208.726	249.221	276.669	1141.67	814.503	977.626	1042.46	965.436	759.517	1005.28	1002.73	851.297	1419.95	782.482	813.631	797.299	1314.01	1108.67	1300.87	975.82	980.539	1100.71	1230.33	829.44	773.865	991.039	1024.74	729.278	1165.72	861.628	1043.09	591.178	1067.55	1024.08	853.162	1013.27	1421.28	1052.13	923.771	1361.11	748.257	968.902	922.032	1069.62	1296.37	747.187	1341
ENSG00000110955_ATP5F1B	242.72	248.55	256.863	994.087	910.043	999.396	940.178	991.895	956.318	960.311	1068.62	1007.79	1031.16	992.041	1003.44	1027.85	982.718	1026.26	975.075	979.622	1023.48	1030.44	969.961	1032.75	984.773	990.29	906.853	1039.75	926.694	1038.61	976.43	962.865	1047.43	994.317	973.63	1019.17	925.763	1002.16	1003.2	1038.04	1039.05	1006.55	948.12	1042.89	976.792	1012.54	937.684
ENSG00000221983_UBA52	218.672	247.696	269.738	1056	867.225	988.677	1081.42	972.407	1111.56	1297.86	675.046	1105.87	925.639	981.425	1105.97	1108.75	963.233	1052.46	911.404	1070.4	975.416	1163.45	1116.77	936.307	760.992	663.745	992.888	1183.86	995.576	973.283	743.747	1051.67	1071.57	1016.14	1017.78	853.696	893.848	762.875	1011.94	1011.43	868.3	949.843	757.447	1416.51	827.199	1184.66	656.098
ENSG00000196531_NACA	222.74	244.74	261.046	1112.6	955.254	1095.55	866.936	1056.76	834.496	994.048	1166.62	908.256	920.146	735.155	992.623	967.877	1190.49	1013.46	728.492	957.338	883.569	998.198	1001.79	1001.33	854.46	1120.32	1079.2	802.147	1046.68	827.383	982.258	911.697	875.807	854.642	975.662	1156.57	1053.55	1010.62	954.19	975.55	948.238	1006.21	1055.64	885.193	1036.71	993.772	949.799
ENSG00000070756_PABPC1	231.31	242.422	256.546	924.828	1002.79	992.648	1043.4	940.784	844.019	957.458	980.865	1085.2	1019.3	925.22	1140.13	1065.37	951.008	1011.94	925.302	942.36	903.874	996.148	987.702	951.814	1084.76	1023.61	964.785	1049.02	920.228	914.578	920.751	893.192	970.262	985.777	1044.08	1068.53	987.702	909.478	1029.97	1091.49	1027.04	966.354	949.324	893.052	928.943	969.112	847.387
ENSG00000225630_MTND2P28	223.521	239.583	267.429	958.645	1013.39	966.333	1099.11	821.203	915.727	1042.15	902.186	1096.67	1122.67	964.868	1114.52	794.125	898.234	843.262	936.49	989.432	833.145	968.067	1026.27	912.857	1167.42	958.02	1036.46	1136.61	914.261	888.432	859.529	909.326	767.154	821.106	1138	1078.9	976.888	955.994	1103.8	956.65	1142.49	892.699	922.994	806.658	1029.68	1208.94	878.662
ENSG00000111669_TPI1	212.18	234.57	249.416	1006.25	886.625	929.45	968.566	1009.87	1056.11	1003.67	746.598	792.008	807.837	982.902	900.316	940.796	938.598	882.837	999.855	896.289	1022.6	1005.07	916.502	947.072	788.015	1075.7	833.915	838.069	1021.95	991.095	937.965	941.542	1055.24	1003.39	812.975	775.063	980.698	927.969	777.681	775.525	882.503	976.562	880.673	914.164	972.927	782.208	990.911
ENSG00000197756_RPL37A	215.356	233.612	260.211	907.975	993.068	902.271	1146.3	1137.03	945.081	929.861	591.983	620.202	1012.95	1014.58	610.87	879.875	1331.31	877.578	975.419	550.689	812.231	971.692	536.07	908.923	860.92	1042.9	1173.75	849.39	1221.09	947.347	1034.68	989.911	1089.93	1138.96	1010.75	1045.01	1215.45	793.671	862.939	901.284	906.822	883.449	642.172	935.935	932.961	769.492	1123.41
ENSG00000109971_HSPA8	199.64	234.669	257.506	1074.57	624.563	1089.13	719.19	816.099	792.713	1053.85	1143.1	969.034	959.937	817.639	958.586	1055.51	739.637	1072.8	827.3	1029.42	908.404	912.267	1024.84	910.167	987.009	880.573	742.608	1078.12	672.534	937.052	745.221	940.298	1014.34	760.481	931.75	1030.22	733.348	1084.5	930.697	960.221	1027.93	1081.14	744.177	974.245	907.488	1030.93	760.713
ENSG00000105372_RPS19	206.938	230.441	254.607	981.358	1023.03	825.205	922.656	1138.11	1133.45	958.282	814.719	709.25	920.872	1059.85	746.23	880.143	1065.26	828.446	1117.29	855.924	1137.03	1068.47	790.52	879.712	818.84	914.01	924.194	787.424	1170.63	973.744	931.204	838.195	998.423	836.653	892.595	709.429	961.356	1050.06	918.929	827.522	753.741	840.698	953.855	1004.61	1125.11	793.738	923.984
ENSG00000196262_PPIA	210.34	226.841	258.972	894.643	846.141	953.201	1073.81	820.34	907.695	864.925	1027.8	845.014	945.356	831.419	896.01	791.79	958.419	787.849	975.046	1072.26	1100.01	765.251	844.037	1080.97	907.034	1077.08	815.982	777.564	800.971	1177.79	1295.23	859.219	1133.57	1035.93	916.263	1146.13	878.309	1033.13	1016.09	820.08	1010.29	1110.47	877.22	726.894	840.467	1035.75	876.206
ENSG00000080824_HSP90AA1	217.354	223.597	233.522	857.572	788.597	880.579	793.427	902.78	782.257	850.789	1074.69	903.494	935.215	898.334	890.439	930.7	943.377	912.294	823.475	873.548	960.875	888.061	868.31	945.559	879.892	939.237	904.458	888.767	774.066	975.206	970.941	867.255	915.152	993.578	886.902	986.443	882.462	840.551	873.623	910.348	878.272	904.487	924.907	862.046	929.29	872.728	949.622
ENSG00000143761_ARF1	208.355	220.614	236.849	826.991	1009.67	881.831	1122.91	957.39	702.78	917.336	796.31	971.56	795.793	950.772	907.397	778.694	847.708	874.959	876.563	831.512	958.993	897.289	815.228	852.452	816.871	937.517	955.127	839.146	825.217	916.139	1018.83	930.562	865.201	1106.14	913.838	820.565	950.69	841.869	890.73	935.715	870.629	891.043	873.319	883.078	870.477	707.834	969.906
ENSG00000125691_RPL23	198.445	221.258	241.981	932.916	857.197	1016.06	707.814	748.547	768.612	833.72	875.444	803.339	939.354	899.179	843.159	772.933	1212.46	793.591	690.945	837.711	782.776	901.054	805.382	794.342	938.896	974.199	1095.12	916.744	923.359	1048.42	1107.31	781.175	1002.51	906.439	892.867	974.72	1081.15	807.051	853.517	877.194	735.46	755.942	949.099	943.222	1031.05	700.215	1034.32
ENSG00000167996_FTH1	210.183	218.193	224.858	892.94	884.99	908.013	828.811	899.569	835.839	893.744	861.86	886.325	876.391	934.544	820.427	931.034	847.564	891.276	867.882	872.643	880.422	838.585	899.022	917.347	741.606	989.365	857.74	787.138	918.594	871.807	836.842	828.21	1001.67	906.009	849.268	883.765	885	861.547	789.452	847.178	872.904	903.445	911.137	857.898	817.402	832.604	860.688
ENSG00000170889_RPS9	199.382	217.126	232.928	876.576	1012.19	890.407	875.1	942.006	932.306	950.532	730.649	769.6	748.643	977.164	806.324	839.952	908.149	837.244	943.779	861.91	913.507	845.062	853.665	859.235	770.026	915.612	822.688	794.594	1065.39	887.053	929.938	906.659	1043.65	847.289	716.321	736.249	902.608	921.118	770.423	786.223	719.598	944.691	817.789	936.294	837.183	712.549	963.248
ENSG00000197111_PCBP2	199.683	216.087	246.363	815.757	865.67	1009.79	1020.41	752.808	763.35	792.405	1144.83	873.122	1086.42	983.207	793.096	1159.04	806.553	796.271	819.154	844.765	1022.44	936.103	794.992	756.8	863.413	971.956	863.595	780.357	870.137	893.471	682.399	996.034	833.281	765.828	865.103	811.264	1053.07	811.686	1112.2	909.864	994.114	953.825	806.115	822.335	905.951	986.201	763.573
ENSG00000104904_OAZ1	160.962	214.262	232.328	873.486	889.876	812.162	853.587	1030.48	999.263	593.534	532.427	814.809	797.927	953.042	779.029	936.786	1007.16	868.165	902.339	593.86	990.688	639.346	911.711	901.172	544.557	620.994	913.881	523.477	927.058	930.062	1044.78	966.809	964.917	632.138	851.534	816.619	617.713	553.465	860.513	836.832	556.181	904.901	911.074	989.753	849.96	825.336	657.348
ENSG00000240342_RPS2P5	198.731	212.97	226.203	929.134	997.587	891.63	876.549	854.193	997.044	899.237	810.292	759.94	921.722	841.85	829.053	674.849	945.731	745.215	876.868	885.948	728.772	783.689	888.73	746.755	905.63	851.472	957.861	875.537	1197.42	795.43	826.255	920.851	858.172	785.447	852.181	825.364	972.865	929.021	851.582	757.609	741.418	794.754	812.327	840.877	779.26	823.771	902.366
ENSG00000109475_RPL34	194.836	212.347	228.195	900.024	793.027	822.635	814.143	866.978	798.31	779.431	900.554	839.907	987.187	832.744	969.084	768.178	950.168	817.902	750.353	877.453	707.058	658.748	723.929	839.737	952.519	882.373	988.421	858.869	913.568	772.028	891.132	740.661	910.412	1020.98	874.037	958.155	889.98	782.209	920.885	926.618	874.455	777.374	779.314	713.813	807.857	735.19	993.191
ENSG00000067225_PKM	198.391	212.067	228.264	930.946	772.293	921.013	817.258	925.577	941.68	945.594	798.831	813.348	790.969	888.854	831.428	896.704	791.508	883.068	922.482	886.796	976.833	899.38	865.11	936.467	800.721	905.443	713.374	882.335	777.563	933.037	771.085	914.345	929.757	808.715	807.195	791.808	763.247	883.344	809.462	820.53	831.409	896.192	759.489	909.191	830.391	773.723	752.505
ENSG00000108518_PFN1	197.35	211.959	225.716	881.419	876.081	858.923	788.828	1008.2	975.28	853.613	715.875	753.626	797.681	966.239	765.041	839.673	798.44	859.225	940.404	847.118	995.414	935.862	805.477	944.402	746.476	874.803	795.061	848.555	863.499	947.843	827.109	883.592	960.728	814.144	763.118	722.887	791.115	873.401	781.046	785.117	775.489	909.291	824.589	920.901	848.669	783.174	815.304
ENSG00000175061_SNHG29	204.627	211.678	218.978	844.282	829.768	827.187	849.43	798.616	731.685	860.991	813.399	863.827	896.644	773.333	848.483	876.538	987.807	855.017	738.417	838.114	766.593	776.088	874.039	762.916	853.66	783.854	933.849	883.527	925.427	816.619	897.271	827.745	895.144	880.213	839.848	824.3	844.942	840.242	865.97	870.424	890.948	833.935	824.171	864.422	788.819	859.944	881.315
ENSG00000034510_TMSB10	193.157	206.75	221.837	862.472	809.865	833.949	908.967	929.516	808.35	874.875	787.283	759.546	806.859	874.705	782.961	783.213	923.573	769.806	808.718	854.833	872.754	891.116	753.211	897.269	781.09	875.077	984.76	787.854	827.134	930.353	944.493	807.666	892.706	1026.22	764.247	826.914	876.049	758.41	709.132	705.398	756.832	763.479	977.328	768.725	872.427	760.384	827.083
ENSG00000243678_NME2	193.622	202.713	218.315	781.9	878.938	778.675	786.724	892.781	879.343	745.836	763.476	802.836	806.141	839.098	764.599	826.38	948.201	827.033	803.813	799.701	811.601	873.627	759.709	882.214	803.422	895.662	815.108	773.095	904.115	757.723	810.102	824.213	950.853	733.759	816.45	751.846	901.764	851.293	783.823	732.446	799.75	840.597	490.687	872.154	846.225	765.92	891.49
ENSG00000234741_GAS5	178.444	201.876	212.042	687.375	800.832	710.436	832.544	709.335	680.924	790.297	859.909	861.234	915.367	708.184	886.755	785.699	914.886	794.263	678.535	822.248	687.419	677.538	796.132	680.938	840.499	730.937	837.209	805.046	823.725	715.483	809.962	751.802	860.221	819.841	831.893	926.838	816.663	755.279	860.532	850.726	835.213	721.564	822.569	852.638	680.46	713.205	864.387
ENSG00000169045_HNRNPH1	191.292	201.412	214.346	788.029	800.377	814.022	751.786	885.624	755.75	774.012	872.765	829.312	803.17	853.333	773.702	826.395	667.244	863.726	743.851	777.359	841.286	826.297	867.72	855.154	748.533	914.04	686.904	803.771	674.179	882.082	757.993	886.162	807.529	800.608	824.095	817.297	720.85	862.069	811.598	786.836	762.325	903.145	728.545	858.126	911.934	786.765	776.591
ENSG00000108953_YWHAE	193.444	201.371	211.238	807.702	776.039	813.398	734.61	759.659	749.711	846.69	860.513	804.854	933.435	771.545	797.043	835.981	745.515	934.656	886.819	806.033	773.037	795.974	817.629	852.644	791.841	797.577	869.933	839.737	749.271	810.984	744.74	896.398	804.657	771.328	800.484	849.759	775.987	862.622	781.997	815.51	862.212	834.473	753.607	804.934	837.996	826.076	754.083
ENSG00000149806_FAU	186.682	199.379	206.775	892.058	810.617	800.823	780.194	825.214	799.726	827.731	657.977	713.83	796.713	839.505	754.889	769.049	844.717	801.922	816.853	817.036	792.165	812.345	759.071	777.12	660.712	775.236	787.638	720.27	868.878	798.318	837.784	837.494	896.214	806.958	712.711	679.102	827.961	821.626	712.083	717.361	724.845	744.007	764.2	839.528	784.586	663.979	857.884
ENSG00000123562_MORF4L2	183.935	194.782	200.117	736.074	779.849	779.15	821.929	726.627	628.42	753.222	792.267	796.958	775.184	750.501	836.693	786.967	829.33	765.739	685.868	735.627	751.384	707.754	748.42	789.69	738.593	805.093	862.366	727.635	769.398	801.32	887.077	724.236	715.904	961.756	785.872	825.603	790.896	686.837	797.918	779.11	794.203	767.466	873.406	677.683	780.433	715.119	805.601
ENSG00000111775_COX6A1	183.359	190.993	200.135	749.776	702.184	666.331	832.786	847.212	826.812	727.093	685.315	732.901	771.785	772.662	800.848	690.077	855.213	731.977	768.559	740.421	804.119	775.963	681.856	788.475	745.794	745.336	799.61	777.169	838.334	771.756	828.316	753.252	797.651	832.55	733.318	715.831	760.572	736.795	765.928	762.013	743.531	714.043	854.785	787.492	733.784	804.048	741.033
ENSG00000173660_UQCRH	181.561	189.564	196.679	736.565	782.924	724.623	755.831	785.675	744.859	731.52	787.063	718.701	789.206	772.348	760.574	704.015	842.848	687.326	766.736	734.113	769.553	755.937	746.809	762.321	714.6	790.095	804.873	727.186	785.427	783.067	836.812	725.929	823.8	832.196	709.382	776.793	804.163	749.458	716.294	742.621	710.033	707.38	818.772	755.489	771.467	714.369	801.784
ENSG00000114942_EEF1B2	178.701	186.162	191.463	797.622	627.542	745.676	672.411	671.186	691.526	770.071	806.046	744.991	775.698	746.25	795.633	750.6	737.909	789.249	679.381	757.258	707.844	671.771	744.306	705.934	803.931	751.143	716.006	739.626	686.024	757.923	714.722	741.569	823.806	722.173	715.049	784.577	746.269	766.573	736.834	755.435	787.447	763.694	706.106	732.75	750.161	730.222	731.976
ENSG00000092199_HNRNPC	177.058	183.699	188.54	756.271	548.694	780.551	660.346	718.84	687.892	783.379	752.481	715.485	723.305	737.419	736.247	631.875	744.435	762.811	741.274	733.345	658.059	769.822	744.856	762.997	668.009	750.771	696.016	746.545	715.361	762.294	624.372	724.768	741.091	733.125	679.882	754.722	705.856	726.204	728.812	719.665	795.802	792.959	747.652	732.272	791.683	671.803	749.143
ENSG00000274012_RN7SL2	152.495	184.316	283.484	741.636	2357.95	743.883	1529.3	1293.81	4615.76	56.5108	595.599	700.235	688.664	1545.76	651.004	662.636	787.576	181.694	3774.89	831.272	1403.49	1490.89	781	935.753	831.605	1457.51	661.821	576.229	444.199	1058.04	617.997	825.903	672.571	601.483	854.014	732.673	1159.24	186.283	732.893	691.793	608.697	613.824	505.859	746.825	1417.91	459.595	516.078
ENSG00000132507_EIF5A	166.109	177.902	197.406	751.682	680.135	712.734	586.957	813.545	847.622	686.579	709.318	695.463	647.549	775.518	630.696	802.151	641.004	794.326	773.677	712.597	846.319	797.801	712.63	844.383	710.618	753.701	608.708	717.032	666.121	795.235	651.854	749.792	812.489	618.687	685.139	663.876	610.507	767.279	707.578	706.849	677.108	808.153	622.907	841.561	756.529	706.89	647.999
ENSG00000163468_CCT3	172.184	177.412	182.879	741.1	633.405	732.384	614.138	674.215	708.2	706.95	792.538	704.122	684.184	682.126	692.022	760.319	690.393	776.609	704.449	725.868	721.178	725.972	716.283	673.779	704.511	711.097	636.927	735.977	680.209	701.804	697.013	728.915	776.231	658.635	694.012	750.208	696.624	754.986	688.183	726.016	713.75	755.583	652.461	749.409	715.213	728.611	713.529
ENSG00000133112_TPT1	144.043	173.297	193.118	511.964	578.933	883.503	717.437	863.009	463.947	476.946	891.067	595.444	506.899	722.293	474.474	554.266	838.862	747.53	459.719	729.494	883.277	783.897	799.841	695.93	677.091	672.308	694.46	691.912	663.022	593.564	539.992	490.555	634.28	760.196	688.022	935.306	794.182	570.024	779.213	694.556	664.143	698.618	575.253	655.679	733.568	701.496	776.566
ENSG00000102024_PLS3	163.295	173.217	183.987	737.355	558.249	778.691	571.77	585.617	552.586	731.724	853.52	726.373	720.006	622.186	693.38	750.859	661.793	747.513	601.175	731.465	621.937	665.453	744.942	683.493	723.255	671.831	621.425	768.133	577.002	685.368	659.127	689.742	678.761	660.539	703.456	826.221	618.626	723.875	723.867	737.516	756.716	761.834	655.996	692.357	696.919	726.573	652.242
ENSG00000165119_HNRNPK	161.926	170.6	182.571	644.925	624.559	700.767	576.431	749.916	673.039	681.336	791.365	666.473	698.983	733.692	667.095	723.88	648.849	737.463	673.1	643.181	753.249	732.417	702.55	777.311	698.723	738.687	618.944	685.665	609.471	752.676	633.806	676.353	633.035	643.526	665.988	722.691	647.322	742.096	681.362	688.071	678.128	693.31	656.423	683.435	733.204	705.039	635.554
ENSG00000234851_RPL23AP42	157.333	170.535	182.94	739.643	628.433	690.935	708.017	678.369	680.728	713.375	749.982	678.135	753.52	623.493	672.887	542.104	768.312	579.896	632.028	692.06	608.329	577.863	682.627	625.326	786.959	620.354	865.025	739.333	722.586	640.454	681.651	707.054	691.112	668.361	741.112	818.285	770.839	712.97	734.816	601.492	668.169	546.417	672.897	621.055	674.592	686.872	692.071
ENSG00000026025_VIM	163.801	169.034	174.399	685.112	695.196	694.552	772.842	637.207	600.539	686.927	630.045	663.105	676.196	702.109	720.073	669.293	720.788	654.416	676.077	681.334	650.336	688.928	661.879	698.398	658.002	736.821	691.299	673.894	723.642	728.124	673.115	639.4	671.199	726.759	654.98	677.245	710.949	617.569	652.168	666.837	704.873	665.846	655.87	639.321	685.018	608.547	693.701
ENSG00000125743_SNRPD2	160.886	166.565	174.928	727.351	617.694	626.359	586.536	766.23	657.164	665.314	660.997	631.99	643.522	721.464	615.411	639.689	776.333	682.403	685.356	666.642	702.95	694.875	648.729	694.967	622.525	665.881	726.005	618.987	691.52	713.721	741.348	643.611	701.292	709.078	665.645	647.449	716.493	666.704	665.049	646.177	592.883	648.896	690.806	688.195	687.691	602.168	694.683
ENSG00000106153_CHCHD2	155.442	163.782	168.699	669.39	677.612	646.365	650.055	726.369	658.346	628.283	603.034	593.717	621.442	696.089	631.36	622.749	697.379	659.509	664.274	665.061	640.763	667.368	600.404	690.077	609.694	677.893	668.894	598.93	701.579	669.271	678.917	615.919	686.961	675.615	588.563	590.722	663.76	633.401	595.746	623.995	626.417	640.347	651.909	677.878	663.193	564.492	672.341
ENSG00000117450_PRDX1	156.386	163.82	168.473	657.549	593.169	610.243	575.626	716.331	695.573	600.345	759.419	657.957	665.782	624.594	646.596	636.359	664.439	619.273	654.838	619.74	726.834	671.195	594.448	707.621	664.845	684.606	597.727	651.94	614.464	716.752	685.967	628.394	674.087	662.601	642.576	690.342	621.65	636.105	666.001	672.059	634.478	629.011	655.724	650.88	673.299	678.378	646.917
ENSG00000127184_COX7C	156.04	162.189	173.116	640.343	606.585	681.188	639.309	718.32	602.681	622.98	687.952	686.241	733.113	619.246	715.195	560.92	827.65	644.055	620.672	668.041	649.378	610.675	608.824	681.02	648.133	675.742	718.897	669.916	693.966	730.177	773.094	575.481	629.248	783.709	684.522	644.394	629.155	627.695	679.925	580.773	634.852	606.245	787.883	628.553	650.921	630.127	699.445
ENSG00000233927_RPS28	157.101	160.412	165.336	638.885	652.85	633.104	698.875	700.216	645.213	641.145	587.034	638.982	632.609	660.446	591.24	616.618	699.992	630.856	634.596	681.938	646.211	642.41	567.764	661.645	580.381	642.326	667.482	653.164	742.981	590.169	639.005	649.262	697.902	628.29	636.783	540.947	643.211	663.341	612.658	628.741	624.876	638.441	671.551	674	612.228	651.414	642.154
ENSG00000173812_EIF1	142.805	157.593	173.852	539.707	715.792	564.951	710.904	612.012	576.168	575.724	549.858	634.933	619.338	743.246	695.591	598.765	721.013	641.802	666.241	569.719	649.921	709.733	565.249	728.721	593.173	765.991	658.812	553.738	649.367	709.656	607.589	558.667	557.69	675.088	538.479	657.025	694.855	496.039	625.809	581.311	678.132	526.464	659.735	624.656	703.404	577.159	736.626
ENSG00000198744_MTCO3P12	144.47	160.829	175.457	659.617	608.042	612.988	686.155	662.367	782.709	676.23	653.385	689.2	827.466	581.5	673.973	427.59	576.673	557.953	617.224	671.471	522.549	632.881	731.175	562.542	837.882	537.087	777.007	822.69	633.249	552.778	523.623	700.703	552.085	421.23	795.563	702.202	653.538	804.173	786.102	625.205	657.275	551.211	589.291	595.695	591.848	918.642	584.132
ENSG00000099194_SCD	146.688	156.312	167.379	634.205	566.56	669.607	728.725	553.048	477.049	670.128	653.853	683.394	667.984	551.758	705.565	633.843	620.131	603.874	564.355	631.271	563.346	593.96	627.826	638.334	669.25	644.565	621.43	692.475	538.986	628.913	597.131	587.56	521.899	693.132	693.359	673.176	597.501	586.483	689.19	667.72	698.885	622.671	597.151	565.72	614.471	603.851	544.993
ENSG00000233476_EEF1A1P6	145.529	156.55	173.488	616.536	576.03	596.136	700.506	658.095	620.269	625.731	706.266	666.486	805.718	571.155	670.345	465.979	790.577	513.566	594.09	636.982	518.684	562.823	624.546	558.28	766.865	635.901	801.104	737.553	674.288	580.531	611.952	626.673	570.042	617.669	775.071	786.559	755.705	586.875	764.744	628.473	664.491	526.789	593.141	550.255	595.424	645.668	654.768
ENSG00000147140_NONO	152.504	157.084	161.593	584.428	671.735	638.089	660.464	548.092	589.435	618.617	594.988	608.775	620.734	613.737	652.315	644.532	637.255	636.48	623.199	625.984	552.617	623.608	630.687	619.387	646.602	562.347	567.591	600.858	658.562	602.843	652.268	656.943	646.341	641.824	625.449	642.724	646.38	618.718	633.059	655.185	635.051	658.094	573.34	648.954	642.702	625.805	614.628
ENSG00000144381_HSPD1	148.758	156.226	161.872	629.615	541.237	655.502	563.895	524.687	508.629	625.689	741.915	663.774	656.521	578.675	661.958	611.796	655.344	614.944	533.891	608.687	591.512	597.812	594.108	628.812	656.473	646.509	603.695	645.142	544.693	642.802	642.456	617.494	624.115	663.731	647.814	753.677	601.87	568.084	635.569	641.86	700.298	618.157	635.835	575.511	645.719	600.794	599.197
ENSG00000070669_ASNS	145.549	156.975	167.766	535.951	672.317	585.956	814.263	511.017	573.482	582.261	658.93	657.234	650.505	572.823	627.055	606.127	694.705	621.927	591.779	579.91	489.579	582.172	640.415	547.205	640.943	592.083	659.99	531.687	690.084	569.34	619.476	577.432	597.365	602.253	628.742	799.659	715.328	667.31	673.276	758.982	672.407	610.315	631.551	634.622	643.518	692.219	716.27
ENSG00000236824_BCYRN1	140.687	155.021	170.368	688.587	564.247	706.881	747.946	643.32	409.54	696.802	553.985	707.342	751.096	579.182	768.507	594.78	585.074	640.912	557.522	672.34	528.189	586.275	596.649	635.041	710.87	467.408	620.919	790.17	538.661	638.456	581.318	564.846	628.571	649.095	663.9	559.821	562.248	617.88	619.245	649.781	783.314	619.007	684.518	548.419	514.191	662.294	526.279
ENSG00000135624_CCT7	141.839	151.772	160.289	621.895	521.511	613.048	552.828	641.929	588.537	659.965	645.884	566.917	574.928	575.361	545.932	598.044	552.493	609.487	609.669	602.569	665.449	638.84	663.185	608.601	626.182	610.916	561.101	643.19	576.651	674.457	607.773	606.403	649.726	593.866	591.421	627.92	559.007	701.135	568.68	605.006	623.372	651.419	543.341	667.851	557.393	535.265	548.443
ENSG00000269028_MTRNR2L12	139.009	152.68	176.875	583.736	581.534	551.438	753.324	792.787	1095.3	589.569	576.87	622.893	740.367	612.19	654.965	408.345	569.832	489.054	818.41	609.249	671.752	730.565	588.081	648.498	765.669	587.162	797.14	751.807	528.351	683.837	528.831	613.207	463.763	506.242	755.822	700.674	653.77	549.127	709.773	571.953	622.228	486.794	597.292	510.049	583.803	695.923	535.972
ENSG00000084207_GSTP1	141.471	150.114	156.141	630.801	567.108	614.962	586.839	655.245	679.302	625.323	535.994	546.581	561.098	622.614	564.985	598.109	608.153	621.805	600.298	609.158	640.479	640.223	571.035	684.838	534.42	609.61	583.999	547.681	586.744	676.577	603.62	584.938	654.147	619.441	530.915	529.464	568.412	608.166	537.274	533.565	568.751	623.791	600.617	624.824	636.892	570.448	565.476
ENSG00000164032_H2AZ1	143.164	149.878	158.261	572.01	582.427	509.425	561.259	647.892	611.78	510.581	634.377	579.823	558.224	625.983	571.892	636.26	702.985	603.185	636.286	574.596	648.51	621.504	520.653	614.521	578.465	623.148	571.074	588.949	646.944	620.008	691.193	577.04	637.075	614.668	583.825	613.7	587.549	529.687	595.841	629.041	570.01	579.504	579.356	639.488	623.977	558.099	655.478
ENSG00000092621_PHGDH	139.522	146.925	157.238	581.788	711.647	582.897	609.563	598.135	663.636	563.059	559.298	571.101	563.281	618.199	555.637	595.428	583.443	619.317	657.281	583.256	529.489	644.985	683.366	591.442	551.425	627.826	539.119	542.434	724.43	560.025	560.701	624.277	680.8	460.395	491.986	583.96	619.862	630.544	557.683	594.626	508.093	645.685	482.562	680.068	629.329	525.548	621.924
ENSG00000065978_YBX1	127.146	143.584	151.8	573.56	537.143	586.043	493.701	556.986	571.869	577.569	492.988	491.543	490.324	570.446	506.678	601.576	573.06	592.275	575.113	600.271	610.57	613.624	572.381	578.535	456.05	638.915	610.355	460.356	635.506	606.201	583.924	594.24	608.982	634.151	514.299	525.67	637.932	580.628	479.06	494.155	491.662	564.948	617.135	551.222	607.532	455.413	613.741
ENSG00000009307_CSDE1	138.823	143.006	149.043	566.718	526.326	562.956	532.299	495.272	438.644	578.401	660.604	603.804	571.843	570.096	624.698	554.983	647.742	530.199	487.17	528.487	526.805	577.39	596.738	568.193	588.529	571.519	594.401	579.907	570.857	586.785	585.71	521.157	467.123	616.59	585.418	645.137	624.122	560.161	590.587	596.841	615.815	565.93	594.471	556.212	572.208	557.87	597.624
ENSG00000105202_FBL	128.661	143.844	157.115	557.353	513.546	589.128	590.838	560.269	711.645	588.797	575.059	645.031	759.253	521.659	659.774	540.255	488.758	633.416	508.455	629.359	527.054	668.734	517.945	566.653	638.985	519.996	469.844	511.862	511.241	575.696	481.909	527.403	599.084	506.529	623.82	625.77	455.628	620.74	487.053	591.544	643.704	676.558	701.347	554.827	591.309	612.547	469.659
ENSG00000241468_ATP5MF	136.882	142.198	146.704	589.131	496.257	586.955	484.934	607.605	569.529	586.393	589.148	571.022	505.686	585.203	536.488	565.661	568.739	544.206	584.654	584.161	592.512	583.615	562.283	563.613	585.429	576.343	565.94	568.091	502.994	589.262	550.051	591.677	616.865	590.542	539.453	539.235	566.732	590.206	536.117	546.686	580.823	555.443	568.843	562.854	601.18	557.284	540.816
ENSG00000108107_RPL28	117.41	143.597	162.219	631.302	679.528	672.456	839.809	595.398	401.594	511.568	495.79	468.415	520.956	410.275	682.452	578.745	410.803	681.898	675.568	672.182	705.518	609.421	591.602	442.885	614.328	378.755	577.115	627.562	545.923	654.735	421.366	562.398	701.921	609.287	473.314	488.62	399.524	740.612	441.416	412.317	527.994	620.777	571.665	445.665	554.037	586.494	546.303
ENSG00000135390_ATP5MC2	126.037	139.591	146.117	530.958	461.551	576.146	581.778	560.758	522.846	554.151	551.869	595.578	561.099	502.022	497.058	526.763	591.717	596.142	570.702	528.923	564.587	491.659	433.415	636.382	760.3	436.082	581.941	640.45	564.583	589.884	428.623	522.102	565.979	571.967	598.73	555.966	493.187	510.519	585.247	640.185	511.308	484.533	582.138	527.511	443.773	661.59	414.726
ENSG00000224114_-	132.111	139.035	148.376	528.999	523.519	557.861	564.777	585.181	550.292	541.34	566.401	558.779	552.466	510.516	594.393	471.422	670.436	475.482	528.314	575.172	513.716	526.242	525.282	505.578	606.246	605.774	615.43	560.407	627.235	531.262	554.415	581.064	590.832	544.831	614.963	627.796	709.596	518.014	568.859	563.063	528.841	490.479	536.842	535.305	608.518	541.751	603.014
ENSG00000210140_MT-TC	124.542	137.523	151.78	542.335	550.119	522.129	623.117	585.104	475.102	563.09	488.036	607.004	538.249	616.904	607.16	576.505	446.423	550.063	633.553	488.784	661.928	684.993	505.995	684.909	503.736	619.172	497.282	560.244	483.124	745.344	491.117	494.84	477.807	543.321	530.542	500.821	432.578	511.708	510.766	550.741	602.156	598.279	575.354	563.44	647.228	618.97	458.103
ENSG00000063046_EIF4B	132.148	136.675	143.184	527.256	536.509	547.575	568.206	487.974	535.774	571.45	610.197	545.822	556.303	599.311	562.106	580.94	606.21	544.149	508.926	615.849	504.232	521.462	543.669	495.448	524.496	551.493	505.908	508.745	556.625	584.766	557.224	582.965	566.012	592.028	584.043	572.103	588.356	541.52	534.592	540.141	521.706	569.029	532.604	532.612	541.977	504.361	572.946
ENSG00000169100_SLC25A6	119.886	136.399	146.134	570.037	664.897	545.022	510.846	557.422	628.502	567.162	431.045	477.688	451.689	603.793	492.927	523.964	532.751	572.048	642.553	550.358	567.007	562.552	546.17	517.051	473	547.02	496.083	478.065	742.964	543.037	549.989	608.505	641.525	498.374	456.837	420.45	577.574	614.017	477.154	478.583	471.722	599.265	482.42	630.295	511.976	468.858	586.858
ENSG00000187840_EIF4EBP1	122.376	135.313	143.135	541	594.979	508.307	559.097	439.62	558.029	574.97	461.303	491.634	525.499	543.583	486.42	606.599	553.548	615.211	553.685	537.29	477.183	532.466	565.244	490.256	475.257	498.788	541.983	449.91	680.345	479.938	509.708	582.493	662.571	465.537	478.27	475.376	552.954	590.62	489.254	525.383	499.841	595.732	561.245	619.523	541.504	554.746	611.995
ENSG00000172757_CFL1	128.469	133.317	147.662	521.726	533.827	501.274	515.305	644.178	663.634	514.668	530.967	476.312	492.2	575.919	498.069	528.916	536.365	565.388	632.287	539.303	636.731	580.397	519.945	593.548	478.9	593.811	481.373	532.706	551.326	614.646	536.712	599.239	603.895	523.823	513.613	493.397	528.679	610.431	529.786	490.277	485.126	569.432	516.234	592.96	583.713	473.137	552.573
ENSG00000196419_XRCC6	125.599	133.561	139.371	539.227	481.383	553.83	510.71	500.651	500.644	509.434	675.794	502.316	557.995	462.372	531.351	595.652	567.136	554.402	533.098	539.047	575.203	492.095	501.773	495.929	513.616	522.318	518.203	505.018	483.289	502.634	555.947	549.812	598.257	490.627	560.48	564.477	492.346	535.387	544.695	520.251	544.884	560.265	526.733	536.029	537.333	560.032	561.624
ENSG00000172270_BSG	116.552	132.848	138.476	551.974	552.914	534.563	519.143	565.397	598.107	528.219	442.855	432.33	437.448	547.16	464.448	546.588	506.366	554.235	560.651	545.589	587.319	543.502	542.505	537.108	451.559	549.756	465.219	457.493	593.913	521.657	491.516	563.564	595.969	516.124	466.073	438.066	506.533	589.345	446.536	463.396	466.61	555.495	496.087	616.24	535.242	475.795	520.328
ENSG00000136810_TXN	127.811	132.299	138.434	517.444	469.481	552.983	513.079	553.919	477.86	531.513	583.313	527.018	571.929	539.944	559.011	479.231	542.735	515.687	470.079	544.701	496.361	517.659	514.113	555.332	576.264	533.798	548.349	553.181	466.976	565.374	529.367	454.017	556.448	529.027	534.143	575.679	510.632	487.217	527.837	559.182	584.713	525.354	521.766	484.474	526.652	534.237	502.838
ENSG00000100201_DDX17	114.405	137.035	146.424	551.983	544.293	574.139	481.801	402.148	381.489	593.907	655.444	628.416	527.927	397.921	564.955	603.49	419.888	568.691	429.685	582.397	399.329	427.136	625.665	397.34	631.082	402.191	476.292	581.922	470.227	388.831	505.193	564.232	463.364	494.471	618.954	582.429	465.9	586.786	628.77	659.344	590.849	572.853	526.942	564.029	455.707	579.185	527.771
ENSG00000100353_EIF3D	123.456	132.967	139.331	550.877	467.918	556.039	531.473	476.033	505.067	539.481	551.629	554.519	544.449	488.235	557.977	569.809	498.674	568.478	488.994	529.097	514.707	518.113	561.518	501.806	561.548	472.068	478.846	514.49	487.586	511.604	499.713	546.72	557.614	493.442	571.494	561.607	475.395	532.265	550.182	556.454	537.971	565.649	492.027	562.986	494.964	582.252	489.421
ENSG00000234648_-	122.858	132.087	148.456	527.343	524.309	529.35	582.043	588.591	505.465	540.028	538.711	621.467	683.432	455.961	598.612	400.295	591.459	458.237	514.016	535.951	466.065	493.142	522.459	526.793	645.987	491.091	567.602	679.991	594.611	461.018	482.102	540.568	492.449	459.195	632.965	628.537	611.267	501.91	659.189	567.332	623.268	496.534	488.798	519.015	454.629	568.503	484.94
ENSG00000087086_FTL	122.682	130.74	134.832	521.752	521.296	464.656	608.596	538.436	538.638	524.511	440.977	542.229	535.469	530.718	540.414	503.315	548.318	527.375	510.412	509.462	582.082	531.184	482.967	562.337	507.262	478.879	556.584	484.852	508.197	516.906	527.982	468.004	556.844	553.646	521.987	481.833	500.483	487.477	511.293	527.512	539.556	479.847	557.605	538.375	487.253	523.936	467.75
ENSG00000131143_COX4I1	114.697	131.682	138.908	562.171	550.252	542.22	440.004	505.075	601.252	532.474	459.576	501.117	457.121	562.91	414.049	573.531	537.714	515.547	551.073	537.654	523.459	451.583	496.547	443.575	505.192	603.357	510.836	430.393	564.357	495.093	535.66	561.226	573.644	577.22	417.171	388.898	565.257	534.139	435.907	502.707	458.524	533.303	551.701	556.943	529.999	412.364	520.773
ENSG00000176340_COX8A	122.554	129.115	135.473	511.408	514.028	484.716	546.443	552.578	545.217	480.062	463.575	530.682	504.803	527.753	520.495	480.658	559.458	514.406	475.662	509.728	542.333	540.632	451.744	570.611	498.053	508.901	524.771	518.511	543.223	542.232	595.841	455.269	530.539	565.99	505.81	476.637	530.905	489.633	530.898	535.994	491.968	452.358	547.373	540.867	512.675	479.704	509.298
ENSG00000127022_CANX	123.453	129.787	134.631	536.887	492.821	524.398	506.455	427.69	416.539	525.984	592.171	575.282	592.541	496.63	551.983	546.434	510.959	517.743	468.829	519.88	458.892	492.868	554.986	526.061	538.661	492.874	505.444	499.547	473.793	518.413	507.524	522.487	480.898	544.867	549.879	600.642	520.594	497.553	538.116	583.005	523.32	520.013	482.968	512.312	500.311	527.19	479.972
ENSG00000198695_MT-ND6	116.761	129.146	134.313	488.534	552.52	507.922	453.752	527.782	584.678	466.593	325.54	515.753	488.868	540.095	563.817	539.368	391.821	560.481	517.415	526.7	522.808	530.378	530.205	534.55	525.48	631.811	436.979	501.663	422.949	489.564	422.813	557.508	530.277	441.867	521.766	348.685	468.4	468.914	513.465	464.463	538.152	576.921	440.142	470.745	524.611	550.551	485.95
ENSG00000218426_-	112.23	126.588	132.322	565.49	486.708	506.697	534.477	516.185	508.009	535.281	530.635	512.221	567.304	439.223	505.746	342.928	514.805	416.466	455.558	525.245	424.258	429.188	522.524	425.975	566.777	454.536	653.227	598.855	455.923	447.978	440.233	514.462	462.59	438.74	585.627	574.155	515.93	512.105	555.397	456.122	506.005	392.042	451.749	428.741	471.815	518.328	475.307
ENSG00000100129_EIF3L	118.509	125.683	133.155	504.036	440.707	494.441	522.152	410.718	471.651	551.248	510.118	538.134	517.13	423.764	532.77	500.232	552.961	474.006	429.525	491.979	492.727	472.205	516.924	417.387	460.397	478.49	493.608	476.951	532.162	464.046	474.166	512.069	474.13	561.49	521.714	535.028	545.442	506.211	582.511	530.531	515.718	543.139	542.032	471.062	501.428	624.222	497.129
ENSG00000166598_HSP90B1	116.863	124.86	132.605	476.36	517.721	482.176	541.269	480.978	382.966	467.612	525.325	531.893	556.064	507.228	534.044	540.07	567.51	524.346	465.789	444.623	467.398	491.919	460.905	498.021	476.532	496.612	574.316	408.256	470.613	515.306	562.98	446.951	510.983	625.172	521.877	602.743	500.856	457.904	525.998	447.224	495.233	516.243	556.603	404.16	505.193	409.972	492.225
ENSG00000132341_RAN	121.307	124.676	128.976	499.51	464.166	505.78	513.145	518.308	481.593	472.262	554.131	491.934	490.449	484.906	496.841	517.688	497.9	517.961	497.369	559.554	502.65	511.244	477.309	491.165	504.084	489.933	439.901	516.823	476.659	491.39	531.52	481.42	543.295	509.983	527.278	564.77	489.965	486.199	477.242	502.741	487.323	503.32	463.493	550.343	507.379	500.254	474.605
ENSG00000099901_RANBP1	113.833	122.786	130.028	526.507	454.424	540.937	401.448	454.789	506.517	533.554	528.186	425.782	487.333	524.975	456.965	519.186	441.191	518.664	489.059	547.73	477.109	520.166	519.958	469.998	443.06	502.151	444.315	493.228	523.204	470.106	474.497	513.166	558.61	466.058	460.007	438.274	432.47	555.435	445.81	449.458	457.521	531.955	512.521	515.204	480.112	508.713	511.946
ENSG00000108561_C1QBP	119.572	124.212	127.915	504.737	434.739	502.922	411.12	499.643	519.268	485.404	555.188	494.241	484.202	478.022	488.365	491.162	477.241	520.857	496.834	500.241	534.435	513.318	486.284	499.804	513.632	498.243	460.199	500.02	474.516	493.559	476.929	506.689	525.116	475.383	477.679	516.007	451.925	521.764	490.351	506	496.866	530.381	479.089	528.727	499.294	487.751	471.088
ENSG00000145592_RPL37	110.861	134.614	169.154	792.313	422.848	645.407	720.054	726.319	431.011	641.082	277.709	476.322	499.877	660.918	463.092	554.216	680.488	627.104	730.115	482.261	420.347	566	448.28	458.195	813.232	631.309	793.292	479.74	433.564	640.013	410.669	437.956	487.303	426.583	768.156	463.187	441.83	704.273	522.698	612.649	752.531	636.969	470.221	739.724	434.052	665.001	422.672
ENSG00000157514_TSC22D3	114.423	122.916	135.75	481.536	647.921	498.083	727.558	430.63	444.01	505.807	457.195	490.746	509.064	500.464	528.215	435.633	659.98	428.226	471.638	486.254	461.783	459.189	450.579	462.669	493.322	547.928	624.815	502.369	629.078	476.701	609.141	433.572	448.927	631.783	485.382	503.815	619.769	452.359	474.803	473.171	520.284	412.045	607.331	413.556	505.596	492.584	596.378
ENSG00000163041_H3-3A	118.283	122	127.125	476.32	441.197	487.218	448.89	521.533	495.521	482.262	510.407	499.067	485.208	516.829	472.068	468.489	502.118	510.324	484.839	463.845	513.74	500.168	490.318	503.865	481.443	509.984	455.462	495.929	480.523	546.431	494.512	438.884	457.64	483.212	480.987	481.2	436.229	500.337	519.807	521.904	505.448	488.78	486.676	557.171	470.621	509.518	451.946
ENSG00000163399_ATP1A1	119.835	121.947	125.325	491.622	439.915	498.562	504.458	469.439	480.375	486.764	525.219	506.1	491.21	447.66	492.952	517.744	475.409	496.895	471.598	479.171	502.236	499.548	483.755	487.399	487.602	479.851	445.849	487.973	466.661	482.817	481.12	495.284	486.193	501.403	503.701	506.098	464.788	494.208	505.142	516.831	490.958	500.986	473.802	504.365	480.341	484.189	464.413
ENSG00000145912_NHP2	116.341	121.499	128.231	521.175	474.735	503.854	456.237	571.404	529.08	475.454	463.836	445.659	469.946	543.849	461.367	477.596	480.209	478.922	489.569	500.301	555.941	506.333	475.11	517.81	435.15	515.086	482.423	477.41	479.846	525.979	506.732	512.838	570.304	481.476	436.095	441.672	512.952	495.985	419.647	458.7	462.147	500.962	498.575	514.811	509.876	460.74	503.695
ENSG00000241837_ATP5PO	117.728	120.861	123.275	491.578	440.973	477.879	481.24	480.887	460.665	465.902	498.008	499.797	511.132	479.908	471.039	484.34	519.215	487.127	456.447	501.614	490.472	471.99	482.551	459.315	463.157	470.872	488.085	492.746	438.601	493.217	486.522	471.192	523.295	508.555	456.312	556.331	491.856	481.563	481.133	481.752	504.189	457.726	484.845	490.007	470.337	488.432	508.422
ENSG00000115053_NCL	116.65	121.572	129.318	533.895	473.085	511.757	426.598	481.207	468.083	493.737	533.622	419.196	509.735	471.775	488.43	492.649	462.537	519.111	525.628	529.561	467.611	505.391	547.616	482.569	478.143	569.382	475.889	466.265	471.629	520.173	510.088	508.158	502.39	476.057	458.24	492.918	498.119	465.145	445.305	465.643	452.635	558.367	523.657	462.723	554.916	451.844	484.142
ENSG00000167815_PRDX2	115.881	119.645	127.2	508.981	454.019	506.46	498.283	521.051	516.828	500.459	473.413	442.39	437.003	512.529	467.193	508.24	473.083	516.903	508.264	510.279	562.367	539.728	453.98	501.411	456.55	473.894	438	477.013	458.088	506.345	444.509	498.35	575.213	452.629	463.355	468.512	431.656	497.33	477.265	490.167	468.222	515.013	475.117	548.295	479.898	473.685	464.039
ENSG00000276168_RN7SL1	102.015	119.831	198.846	473.28	1609.13	451.17	1112.16	899.329	3638.21	379.77	420.731	469.065	437.039	1076.56	409.525	438.342	498.853	347.403	3097.7	517.049	1044.5	1061.32	500.872	605.423	529.799	872.328	415.352	373.934	300.399	642.62	378.816	571.623	438.648	404.562	521.273	503.03	846.304	341.684	467.223	485.367	407.572	425.943	332.699	509.093	890.626	312.567	321.773
ENSG00000229344_MTCO2P12	106.923	119.652	133.887	503.283	415.101	477.456	449.916	534.882	598.821	479.76	503.769	505.902	611.691	420.76	487.338	335.306	434.498	398.373	482.455	492.086	391.584	456.827	558.8	417.622	606.962	440.961	565.566	581.483	459.996	415.106	391.399	538.764	428.773	355.132	626.752	519.942	530.858	535.771	554.072	429.492	493.098	398.998	432.375	427.332	476.847	627.903	476.837
ENSG00000167978_SRRM2	111.72	119.076	127.208	466.504	529.205	481.536	505.087	522.214	459.544	532.068	445.025	499.192	418.35	469.072	491.762	546.192	326.568	511.572	473.671	498.168	510.078	463.735	520.305	520.828	478.938	487.443	388.248	462.504	352.911	479.974	385.559	543.459	447.585	436.178	505.071	434.872	355.451	493.733	466.888	479.54	463.993	513.27	446.648	526.953	449.529	458.86	386.857
ENSG00000143742_SRP9	112.025	117.608	125.091	457.074	425.341	469.908	471.608	441.361	389.969	447.576	526.106	505.089	512.663	436.375	477.128	440.697	521.999	479.462	409.952	458.947	431.153	449.671	462.181	475.679	505.673	470.363	479.593	489.881	450.542	470.504	518.107	420.867	452.923	521.744	496.926	524.713	479.241	428.404	488.237	501.51	503.441	463.926	510.767	426.439	465.178	454.601	495.266
ENSG00000110958_PTGES3	108.681	115.656	120.405	451.369	436.281	445.58	432.663	452.588	395.622	420.448	521.664	481.466	484.976	456.944	481.67	443.033	495.682	472.715	419.701	424.588	447.703	457.448	433.083	482.553	475.622	487.761	469.232	466.538	420.966	486.121	496.504	434.207	445.385	553.738	479.747	522.114	461.857	397.71	472.444	494.612	480.915	442.445	470.579	420.85	463.394	420.13	475.593
ENSG00000115484_CCT4	110.005	115.309	119.138	438.826	427.994	432.383	466.676	445.699	413.443	428.467	495.364	476.458	506.508	443.599	493.101	460.587	502.884	451.334	434.726	458.273	463.199	426.131	433.963	452.586	465.591	475.829	458.979	457.181	463.434	476.584	502.642	421.739	447.624	518.262	466.582	499.128	480.729	420.125	469.995	472.763	492.328	454.108	484.628	426.265	461.884	450.19	469.037
ENSG00000135069_PSAT1	108.378	115.528	118.85	426.713	470.946	437.522	468.11	383.44	387.536	431.27	521.406	462.221	474.854	427.603	442.625	435.607	517.058	475.584	439.093	437.121	376.139	433.758	474.017	409.961	468.51	439.511	474.261	441.513	499.277	414.215	484.628	415.312	428.902	433.429	441.617	516.864	509.564	463.444	462.355	498.002	492.154	464.033	462.002	459.228	484.785	471.946	535.247
ENSG00000142168_SOD1	110.222	113.679	117.431	465.64	445.122	457.225	415.129	469.753	455.126	453.277	454.304	430.21	450.355	474.768	436.984	434.256	495.721	462.93	471.718	457.96	459.684	440.477	429.171	451.864	438.554	504.397	469.63	445.749	466.966	509.485	469.487	467.506	502.255	479.552	442.916	453.704	467.299	416.367	448.404	431.773	438.408	475.128	444.219	442.12	488.837	427.682	485.717
ENSG00000067560_RHOA	98.2792	112.651	118.869	459.903	450.664	381.679	435.683	358.476	354.703	442.928	499.198	406.178	382.494	388.433	464.699	516.812	466.867	477.702	442.507	450.541	459.759	474.976	406.566	475.641	481.087	470.165	507.868	473.469	503.611	464.354	487.485	359.882	387.489	484.32	400.868	392.028	461.293	371.292	431.655	392.361	516.124	395.384	494.217	435.292	422.45	340.625	473.294
ENSG00000166681_BEX3	103.641	110.656	121.549	463.47	475.783	432.285	425.359	519.108	528.417	423.025	426.609	373.024	412.217	498.21	391.316	424.688	486.203	421.6	477.488	432.211	493.046	486.183	428.838	485.187	387.209	488.816	425.126	432.918	514.545	497.424	473.634	452.327	493.404	407.012	367.791	395.913	469.728	454.156	398.718	407.032	373.754	457.123	431.036	487.226	481.31	402.062	503.398
ENSG00000283041_-	107.327	112.852	117.385	470.343	444.448	454.475	515.294	462.432	457.424	480.172	444.237	433.247	490.36	421.074	438.369	360.712	508.451	395.902	434.797	445.038	407.605	421.193	458.422	415.674	466.892	449.47	539.812	478.232	484.307	413.432	465.248	455.927	428.671	454.979	478.845	466.786	483.909	443.659	471.723	413.748	432.233	401.731	453.344	431.211	447.099	425.375	467.136
ENSG00000133124_IRS4	99.4923	111.672	120.012	481.395	372.39	516.219	387.395	416.972	326.443	518.524	472.336	462.841	423.074	425.82	461.846	460.314	345.524	445.015	451.334	466.073	417.799	476.001	487.916	512.711	470.538	488.227	422.169	529.544	334.848	496.754	352.381	397.242	316.727	400.78	442.705	461.607	372.556	426.087	448.358	470.17	483.308	489.174	400.152	381.07	508.093	425.419	373.888
ENSG00000130741_EIF2S3	105.63	111.453	117.192	421.213	439.383	444.116	469.02	377.158	343.004	450.447	460.771	478.256	483.777	419.037	485.379	458.196	460.677	440.137	397.848	466.036	368.823	393.875	460.781	400.722	473.307	427.704	468.004	447.439	427.366	422.527	443.208	422.516	426.723	483.417	477.464	501.437	460.482	394.072	495.342	498.127	484.242	443.713	457.017	406.243	444.187	429.343	450.566
ENSG00000124767_GLO1	105.94	110.502	114.793	436.544	405.685	449.185	408.477	390.457	377.609	447.498	480.613	472.767	461.855	428.947	466.436	437.589	448.614	451.761	380.068	439.734	423.479	421.659	443.365	440.651	450.367	432.275	446.531	459.279	411.857	432.506	466.666	404.253	417.017	486.031	458.858	480.292	437.074	434.295	461.436	476.279	492.721	435.336	447.964	424.6	446.333	443.708	418.513
ENSG00000104408_EIF3E	104.798	110.86	120.845	446.028	385.55	523.426	432.964	327.832	376.106	422.155	467.401	430.651	520.976	418.689	522.212	502.921	499.572	527.919	339.028	436.366	384.895	407.723	456.944	325.515	511.081	398.983	476.094	430.577	448.047	412.803	438.384	469.21	406.69	504.228	453.771	423.691	459.57	476.375	494.062	440.855	501.619	481.986	436.245	420.699	448.231	483.843	426.082
ENSG00000143621_ILF2	104.375	110.265	114.3	448.163	384.896	441.228	399.632	439.441	441.393	479.129	484.463	417.89	445.19	438.791	376.486	458.145	395.383	453.848	442.342	457.34	460.111	472.481	453.228	462.152	422.943	435.662	438.098	447.701	360.51	457.335	413.492	436.956	473.687	451.071	414.012	426.77	383.441	467.436	417.369	456.793	428.667	471.341	401.532	428.177	440.89	442.217	404.867
ENSG00000122566_HNRNPA2B1	105.05	110.144	112.239	432.206	438.8	414.047	368.219	474.58	442.541	424.526	527.621	409.431	443.15	446.605	405.178	448.809	422.211	452.501	440.507	422.984	457.896	447.943	446.502	458.209	400.089	493.206	416.26	419.527	449.006	494.379	456.211	448.073	438.471	428.144	414.422	440.647	422.748	424.138	404.707	417.019	416.628	444.902	440.855	446.906	503.266	428.885	466.769
ENSG00000125356_NDUFA1	104.653	109.696	115.449	453.967	453.046	422.5	456.128	518.553	459.896	388.031	447.677	430.567	438.272	460.855	422.598	362.025	574.74	389.216	435.513	402.135	429.572	450.429	421.191	470.954	446.988	451.43	494.179	424.672	464.288	481.461	476.34	406.46	450.938	486.133	430.107	439.294	479.989	404.629	436.223	410.43	417.153	383.743	437.196	408.415	464.102	417.75	462.108
ENSG00000158710_TAGLN2	103.462	109.748	113.936	438.702	435.553	468.558	444.508	468.159	391.187	474.807	375.135	461.159	448.406	426.631	479.268	439.576	424.887	455.823	401.799	461.767	406.724	410.169	439.767	442.761	425.531	437.765	437.096	448.946	394	447.797	451.904	426.693	480.355	470.422	448.42	395.651	405.276	409.884	459.508	435.988	439.283	459.501	455.509	425.795	434.711	390.056	407.818
ENSG00000244398_-	98.8725	109.37	118.002	504.795	412.796	493.547	459.363	462.899	460.718	495.335	463.818	394.246	538.686	374.225	455.381	299.239	456.273	346.598	388.407	441.289	328.083	346.309	455.531	386.201	494.111	418.176	624.685	486.909	422.716	343.539	399.221	453.182	415.074	403.341	501.887	524.038	477.201	449.165	474.738	354.718	415.374	375.991	418.511	407.466	405.009	463.646	433.668
ENSG00000235174_RPL39P3	104.69	109.121	123.405	450.084	391.371	435.611	500.19	429.094	371.852	411.149	520.974	442.065	490.638	431.399	437.358	385.854	633.896	377.434	423.72	454.641	421.657	363.439	426.148	421.192	456.369	499.196	579.918	415.157	465.787	431.219	529.391	425.161	494.611	534.442	451.22	574.993	525.403	414.926	470.504	421.479	428.865	396.753	483.109	417.951	469.7	348.643	515.102
ENSG00000123975_CKS2	101.625	108.536	115.984	405.949	436.311	398.086	429.385	449.848	408.148	375.26	418.422	485.372	464.512	432.222	513.467	379.486	512.967	409.294	397.343	401.197	431.025	428.623	403.409	482.037	453.611	451.953	481.296	436.07	427.305	443.165	522.473	388.434	398.784	540.584	474.321	454.285	455.868	368.061	453.802	462.215	478.207	415.954	516.034	375.093	429.358	421.32	458.719
ENSG00000120438_TCP1	105.093	107.689	113.678	405.525	385.805	419.289	416.383	473.77	407.576	412.622	480.81	429.292	442.284	459.696	443.629	429.624	454.77	431.884	422.491	425.026	474.54	450.439	413.833	477.057	422.796	476.751	416.73	421.143	426.268	462.088	454.534	422.714	428.729	476.672	426.714	459.112	436.672	399.187	428.994	439.615	435.834	433.891	459.585	420.117	445.638	413.564	439.535
ENSG00000159377_PSMB4	105.734	108.929	112.201	424.776	385.928	443.567	416.662	438.657	438.307	418.01	449.452	446.858	486.377	430.832	436.063	436.989	423.518	445.817	423.158	452.479	437.519	429.193	437.272	463.054	456.048	429.398	410.321	476.059	412.234	427.444	407.339	424.706	466.189	404.308	427.662	435.367	403.997	409.991	455.483	454.745	443.233	437.17	429.471	461.402	422.863	459.749	413.197
ENSG00000213923_CSNK1E	102.668	107.51	114.732	417.525	491.739	409.799	434.554	474.589	472.424	444.881	364.76	433.095	420.006	475.018	410.466	460.563	374.369	449.085	462.754	429.473	474.981	442.518	433.289	430.606	411.358	446.783	412.582	378.062	462.555	444.376	408.598	468.74	482.133	414.475	398.855	365.8	417.761	439.5	402.63	420.674	421.048	454.025	403.389	473.318	411.285	391.335	427.009
ENSG00000147274_RBMX	101.6	108.589	114.693	462.238	375.525	447.312	359.098	399.82	357.01	489.656	492.093	437.81	418.234	399.645	448.973	483.986	410.319	470.602	391.992	463.278	433.643	425.048	443.371	413.844	408.839	466.47	381.843	436.877	390.367	417.561	403.521	452.248	406.118	420.288	422.784	464.135	407.244	460.947	449.72	439.117	435.066	469.154	390.05	446.603	438.546	463.065	424.164
ENSG00000100632_ERH	101.69	106.817	109.647	436.15	391.808	456.366	391.512	412.005	387.098	414.066	439.391	430.266	431.168	433.859	433.704	399.428	381.298	439.985	407.978	438.483	428.53	427.654	437.525	438.622	450.598	406.352	415.423	470.315	379.277	432.475	413.645	408.968	425.831	393.095	418.207	440.502	394.534	465.665	417.884	442.29	449.272	435.892	402.623	426.879	424.568	466.369	387.134
ENSG00000167468_GPX4	98.8157	106.229	110.481	425.012	450.692	403.952	443.195	457.553	466.76	420.916	347.213	388.746	395.219	434.192	395.394	436.82	430.155	442.971	438.774	426.299	453.556	436.68	394.731	411.756	391.557	405.821	421.962	402.054	467.524	401.129	458.85	433.912	457.411	444.294	375.806	345.013	424.824	410.403	370.593	405.177	357.66	429.727	432.379	467.711	379.581	393.054	427.905
ENSG00000116251_RPL22	100.051	104.783	110.043	430.298	416.034	435.648	435.681	393.759	357.579	418.495	455.68	414.625	452.402	417.663	419.773	420.097	480.248	396.256	383.108	425.541	382.952	397.497	415.621	399.12	422.254	441.138	460.501	406.142	437.28	425.661	462.996	396.639	422.17	483.171	406.34	463.546	463.707	414.246	407.031	398.646	403.459	407.178	460.299	388.825	425.072	386.518	467.885
ENSG00000247627_MTND4P12	94.6038	107.066	119.429	431.979	414.519	434.772	479.381	448.496	453.335	484.892	424.548	449.585	550.09	378.611	469.062	280.045	381.269	357.977	407.971	482.128	342.741	397.458	460.933	403.753	576.596	378.022	530.078	566.61	384.694	375.589	358.664	455.624	352.248	325.916	569.661	478.502	435.288	459.066	537.238	403.011	475.364	371.677	389.87	367.789	379.371	554.326	378.35
ENSG00000143799_PARP1	98.5991	103.682	106.171	408.808	416.083	416.075	380.675	421.463	426.262	416.874	416.505	362.638	371.64	404.804	385.642	425.784	397.437	416.042	425.264	401.034	431.576	438.228	415.922	420.218	396.224	433.92	387.706	393.86	414.486	429.599	414.968	427.656	415.75	406.397	382.31	392.054	406.134	426.748	377.772	396.007	373.001	434.733	400.505	425.012	423.695	378.751	405.215
ENSG00000092841_MYL6	95.8663	102.409	108.665	422.708	366.162	411.828	357.49	497.114	470.477	395.817	384.24	339.867	383.207	464.53	350.503	404.066	407.445	421.766	446.969	415.378	463.478	440.838	385.199	434.994	404.787	428.31	401.048	386.218	405.478	453.897	402.918	434.74	473.233	415.265	352.083	365.09	428.912	434.424	364.22	343.462	365.193	425.158	399.514	431.805	466.825	368.661	422.701
ENSG00000168653_NDUFS5	94.6515	102.787	105.833	425.208	370.627	410.944	346.777	420.749	395.032	418.445	440.07	343.416	413.621	418.56	370.074	411.35	433.402	419.812	371.666	413.447	381.489	426.581	378.257	397.038	380.136	444.87	424.162	374.333	377.403	450.388	417.241	374.641	428.518	452.927	382.35	414.306	418.252	398.911	369.525	379.652	374.232	397.307	447.022	402.106	433.668	394.857	420.837
ENSG00000213741_RPS29	95.545	102.519	113.031	384.393	403.056	383.761	439.249	428.218	375.441	376.668	358.4	457.577	474.851	406.557	417.113	321.649	609.38	352.025	397.181	419.356	397.333	369.394	361.525	391.896	421.992	425.68	560.863	453.399	493.775	465.275	511.445	345.635	436.676	451.956	416.201	413.599	501.501	392.972	403.03	385.994	371.742	374.967	453.411	381.653	421.015	400.229	452.181
ENSG00000119335_SET	98.4058	101.55	108.247	416.309	383.397	402.682	370.604	388.573	373.276	378.278	470.222	399.772	415.365	402.906	407.505	404.895	448.036	396.879	386.779	375.837	404.512	439.491	433.268	393.614	394.853	436.741	387.427	393.651	393.096	409.652	423.182	399.986	389.675	439.796	412.967	484.072	437.326	410.2	441.446	402.14	415.415	432.144	410.196	393.942	422.63	435.045	441.918
ENSG00000126267_COX6B1	96.803	101.914	105.39	430.172	375.464	408.904	419.751	441.625	437.088	407.704	387.138	417.167	424.647	411.338	415.561	386.922	366.197	409.955	374.271	423.085	445.796	413.302	387.433	404.987	423.244	368.49	388.504	409.113	361.75	412	364.717	393.559	460.882	385.013	407.608	396.875	360.961	416.1	435.693	400.488	393.037	395.485	396.415	422.16	394.306	437.265	350.364
ENSG00000231414_RPL39P15	95.2144	102.564	115.383	461.483	390.069	443.912	512.728	386.719	445.251	437.279	511.109	455.988	566.435	417.877	383.749	306.47	452.771	331.089	371.105	465.679	361.272	394.901	402.631	328.709	465.368	378.68	536.136	476.966	445.887	394.554	367.826	397.012	400.264	380.25	498.322	525.607	443.367	461.551	476.189	349.992	357.421	328.011	386.19	392.456	382.681	444.707	421.21
ENSG00000142864_SERBP1	97.872	101.47	105.606	420.779	386.991	441.024	352.426	370.234	362.415	411.92	437.203	392.113	431.286	390.027	407.31	406.01	380.909	423.818	392.117	416.211	396.698	382.69	424.079	394.465	407.53	439.545	407.559	414.59	405.221	375.862	429.18	398.448	394.73	399.833	391.28	445.209	417.536	417.262	405.539	409.137	437.921	430.003	369.009	389.285	395.243	405.746	422.971
ENSG00000103495_MAZ	92.7168	101.283	108.138	409.601	470.841	433.339	427.453	438.318	515.066	414.303	329.272	358.865	396.8	415.53	396.038	411.313	383.789	403.678	423.449	402.677	443.369	456.628	418.74	372.509	370.32	370.013	380.356	368.069	511.074	436.419	430.192	425.457	480.262	395.868	336.398	303.85	406.585	480.123	323.649	350.138	401.995	421.008	339.225	480.195	352.342	388.065	380.502
ENSG00000215030_RPL13P12	91.1276	100.718	107.96	429.869	396.853	401.503	407.605	432.311	443.74	427.821	396.776	364.144	453.31	355.951	405.146	288.31	466.089	319.268	368.617	435.282	324.282	320.659	421.351	332.414	412.576	378.426	502.076	404.238	447.247	343.479	380.766	439.315	405.647	360.61	448.116	438.095	474.752	430.425	426.162	349.755	373.902	335.505	397.743	365.609	390.409	391.532	428.084
ENSG00000031698_SARS1	96.4847	99.9524	106.405	390.515	445.004	398.557	412.139	339.377	397.771	396.181	415.05	392.169	384.724	380.612	377.443	445.899	410.873	430.155	412.355	407.833	360.062	393.194	426.367	341.694	389.585	401.062	390.542	347.105	488.53	355.484	391.868	423.385	449.232	361.883	372.695	423.18	429.655	440.516	393.468	416.133	397.362	435.339	373.427	437.652	416.517	411.718	469.727
ENSG00000125835_SNRPB	90.5231	98.8587	105.172	409.71	430.78	393.132	361.682	438.645	450.432	389.091	351.339	350.781	357.981	448.268	356.126	388.749	397.738	392.952	447.432	402.654	447.564	399.335	388.948	415.908	357.285	418.19	379.255	369.209	438.785	405.867	385.239	429.87	460.509	371.102	359.334	338.339	407.435	419.402	367.064	363.324	360.236	421.117	361.027	453.358	403.637	349.995	412.18
ENSG00000130985_UBA1	90.4283	98.5982	102.055	398.93	356.737	405.291	361.733	393.716	394.503	395.541	377.478	394.668	367.054	380.55	383.232	438.09	310.244	442.235	398.845	396.855	411.718	412.091	399.561	416.953	396.399	361.707	302.475	394.198	321.288	384.231	332.373	416.596	418.405	332.73	393.57	357.716	307.369	409.197	394.282	409.78	396.602	430.655	328.72	445.975	379.348	397.805	314.16
ENSG00000143612_C1orf43	93.9444	98.4965	102.462	405.944	366.207	401.743	407.344	379.686	375.404	361.997	421.834	409.204	419.25	361.849	379.059	421.258	408.571	392.874	382.617	379.431	372.306	402.14	403.541	360.287	371.971	395.064	357.923	376.899	418.036	350.274	398.752	400.715	410.887	448.622	374.707	441.416	390.489	407.342	389.632	410.065	420.542	381.047	414.519	392.908	372.226	431.169	382.324
ENSG00000146701_MDH2	92.9242	97.7403	102.258	396.627	368.928	389.978	414.377	410.984	408.187	389.402	357.749	408.658	400.236	396.005	386.694	420.687	342.52	406.57	410.075	383.954	415.366	411.177	388.554	399.029	378.344	372.782	341.589	416.936	334.121	390.583	358.024	409.159	444.349	369.832	393.778	371.335	322.509	391.339	388.003	401.678	379.322	428.781	384.395	421.005	367.364	396.037	328.099
ENSG00000166508_MCM7	91.3839	97.1189	103.538	387.094	408.537	378.185	397.513	416.263	433.833	368.977	380.223	365.657	350.728	399.385	364.079	415.101	345.774	417.568	432.191	365.495	409.854	421.588	391.82	397.055	369.845	425.108	329.86	347.336	397.82	408.45	373.443	443.645	436.323	370.603	356.457	361.516	366.914	411.303	364.492	389.857	350.874	421.899	367.361	455.717	404.553	354.351	376.926
ENSG00000169020_ATP5ME	92.0219	96.686	103.1	427.888	370.013	417.563	419.005	444.807	407.913	405.221	379.967	353.768	398.521	400.967	382.876	338.019	415.937	355.522	379.55	396.941	398.337	383.05	346.471	412.525	371.598	412.026	478.845	387.919	378.312	385.569	408.236	397.53	407.997	446.648	352.759	381.985	441.576	368.005	354.852	342.44	324.538	368.335	425.487	365.001	430.591	351.66	380.807
ENSG00000140990_NDUFB10	86.8581	96.8938	100.197	399.502	387.754	395.794	354.037	414.956	428.289	355.08	345.089	326.902	331.405	374.627	325.427	363.068	389.774	391.794	412.855	379.515	389.052	403.299	353.253	404.642	330.584	396.242	361.175	360.758	431.664	390.975	407.674	423.83	434.008	358.269	329.575	332.147	392.699	401.216	311.194	345.492	335.852	390.212	386.053	403.187	387.397	328.942	390.989
ENSG00000113328_CCNG1	87.6578	96.9982	104.115	422.12	338.585	437.869	369.703	315.307	318.325	406.64	431.457	414.714	433.373	343.177	424.914	387.405	428.013	390.814	326.122	414.553	337.279	346.346	394.151	346.714	404.882	369.22	358.971	434.146	349.293	354.645	389.365	360.929	349.158	423.098	389.543	443.135	374.406	386.873	388.581	401.683	429.483	417.04	384.807	336.182	375.706	381.034	413.396
ENSG00000132646_PCNA	94.035	96.5336	99.4706	392.838	356.093	388.487	386.2	408.747	381.144	366.1	413.942	401.497	394.405	416.607	378.813	379.37	397.528	376.742	379.581	395.365	399.164	395.718	365.583	413.244	381.741	392.961	387.675	392.735	368.663	419.728	375.475	344.522	377.395	401.065	370.94	407.465	365.271	376.107	378.337	386.07	399.375	376.238	389.378	381.893	398.001	371.579	371.033
ENSG00000106028_SSBP1	91.0081	96.6592	102.069	372.857	335.1	434.408	322.15	384.133	348.114	362.992	503.071	374.273	420.142	417.432	385.433	414.07	397.469	387.841	333.539	350.723	367.012	339.816	418.828	365.913	396.427	406.348	393.86	395.092	355.156	406.26	408.6	411.881	379.08	402.176	363.406	493.176	398.309	407.299	358.366	383.837	375.933	388.377	366.999	385.285	418.302	363.047	410.915
ENSG00000136938_ANP32B	93.3185	96.2543	101.174	399.757	403.036	400.619	360.778	352.853	359.595	396.482	405.249	379.247	379.99	387.904	378.703	407.423	385.532	400.486	377.847	393.436	356.923	372.467	408.828	367.823	364.068	410.023	384.502	351.203	420.925	391.958	378.103	411.575	438.843	382.85	365.581	413.258	412.626	387.943	375.695	376.257	381.499	417.685	371.382	381.093	392.165	354.182	411.293
ENSG00000180817_PPA1	90.0885	96.4489	99.7372	387.449	342.771	391.854	341.83	333.051	341.031	378.492	463.403	399.493	433.172	339.675	404.124	389.074	388.279	387.839	351.068	405.368	356.931	356.985	379.705	354.75	406.639	368.7	378.271	414.691	351.171	361.309	386.517	371.179	401.158	384.138	397.317	435.178	379.221	385.447	393.204	404.007	436.36	386.145	371.69	360.036	366.916	393.545	386.436
ENSG00000173726_TOMM20	89.8358	96.0563	102.137	382.413	358.12	396.991	382.17	341.302	300.99	388.7	412.401	432.171	436.627	361.941	455.977	376.101	374.062	391.788	351.854	386.867	349.433	371.574	396.701	387.65	415.595	386.038	371.928	421.846	351.325	389.654	365.581	354.233	359.263	394.157	415.972	436.353	359.127	359.585	429.394	437.232	452.504	391.697	362.061	358.14	366.715	390.955	351.639
ENSG00000242299_-	89.6788	95.776	106.368	422.127	355.556	404.127	422.74	451.62	386.579	403.904	426.381	379.584	468.911	356.902	415.34	266.161	461.777	312.453	374.47	421.162	308.323	333.724	377.078	329.779	456.968	378.82	518.939	467.992	394.908	361.514	365.675	408.709	361.689	357.832	473.24	484.967	456.949	385.733	468.164	359.104	388.203	327.915	341.935	358.586	370.39	376.118	380.475
ENSG00000239719_-	84.4378	95.1122	114.509	474.688	384.574	409.209	460.639	453.382	422.228	455.825	329.305	402.366	515.205	379.867	427.678	212.978	377.339	289.991	364.731	458.773	290.791	354.971	434.813	385.657	549.294	303.677	657.177	588.569	331.818	369.869	340.145	380.862	303.321	313.068	575.832	441.051	379.3	466.322	539.267	374.331	380.035	304.471	367.196	337.184	339.452	521.372	293.001
ENSG00000179218_CALR	74.027	90.7832	103.723	302.889	471.879	295.66	433.172	438.715	403.288	295.222	290.783	296.572	277.547	413.997	312.018	360.663	411.191	355.379	415.189	293.164	440.908	444.958	317.397	432.723	278.991	426.465	389.885	265.385	421.021	427.814	399.133	345.439	370.719	422.375	307.997	284.782	406.303	314.357	295.953	303.689	281.46	340.325	393.859	365.603	408.052	285.225	413.192
ENSG00000210049_MT-TF	69.0868	90.5469	131.174	283.214	355.627	274.059	406.239	919.015	757.436	270.146	209.492	243.764	343.724	832.394	357.208	305.144	447.517	291.458	665.009	257.968	869.18	789.556	255.353	980.786	216.182	752.156	510.696	395.295	339.286	826.258	409.394	313.306	306.211	529.362	269.839	332.073	388.107	253.293	257.733	214.947	396.21	367.167	506.801	308.685	677.195	388.625	372.43
ENSG00000178035_IMPDH2	90.336	95.2152	100.616	391.194	331.573	400.685	387.381	379.351	322.311	471.146	369.703	403.055	416.889	383.065	398.701	456.752	363.637	403.201	370.559	404.178	374.146	354.386	389.982	364.864	389.767	410.426	356.285	436.676	349.276	368.006	351.543	360.579	404.27	378.967	356.382	397.978	365.257	397.311	380.377	407.61	414.562	381.345	357.437	356.574	359.341	391.094	366.902
ENSG00000102054_RBBP7	89.7946	94.5123	100.253	401.018	333.21	426.952	339.249	375.546	315.744	419.432	438.896	387.193	401.62	365.135	412.861	403.847	362.099	386.242	355.001	388.439	380.082	356.818	415.199	384.93	360.484	400.99	356.215	398.628	319.292	392.655	373.549	386.675	372.332	356.686	400.225	418.163	348.863	389.653	373.87	404.078	376.017	409.525	363.57	374.099	358.743	361.125	354.186
ENSG00000156261_CCT8	91.8822	94.7669	101.161	385.339	349.418	367.985	361.308	370.105	314.2	379.866	450.505	405.554	438.154	374.606	416.161	366.12	412.749	368.498	353.043	371.471	378.27	367.377	350.471	392.289	394.635	389.156	368.156	398.669	345.575	401.909	410.765	369.001	363.129	415.751	406.399	436.614	374.629	357.642	394.148	418.854	409.705	377.6	397.577	365.126	383.755	383.979	375.523
ENSG00000180879_SSR4	88.9116	93.3311	98.2392	394.471	369.402	373.168	350.885	397.759	347.566	391.65	296.374	373.904	387.294	360.948	341.694	347.293	401.206	397.149	378.636	393.392	373.481	422.82	378.559	382.695	374.295	359.475	367.229	363.482	393.794	366.441	401.471	409.151	402.439	373.488	354.67	318.119	350.81	359.536	339.962	350.017	337.002	381.825	379.214	394.32	358.575	371.058	371.102
ENSG00000104824_HNRNPL	89.6073	93.1466	97.3592	386.963	317.462	380.417	318.695	419.014	372.577	377.865	395.767	372.596	361.245	371.185	378.806	390.185	317.459	399.982	366.098	378.593	424.688	387.192	358.377	412.495	363.497	413.392	323.419	374.495	287.74	404.313	326.194	391.308	391.059	343.332	371.866	383.335	290.708	363.125	367.53	396.032	368.576	380.342	337.241	382.375	360.033	358.584	299.534
ENSG00000115128_SF3B6	89.3895	93.0412	97.4843	356.539	363.569	378.359	371.127	373.203	324.962	366.874	415.786	367.529	424.893	376.959	386.631	361.548	401.06	363.654	344.56	390.79	351.089	360.616	352.601	375.538	353.155	379.057	412.177	347.667	347.521	385.316	395.654	331.964	375.05	442.871	375.531	403.325	399.301	366.847	365.256	351.176	369.526	387.379	413.696	345.017	392.765	361.344	386.202
ENSG00000160752_FDPS	89.8906	92.8745	96.421	383.238	367.691	372.713	421.982	392.71	360.615	387.377	324.592	341.944	355.439	374	378.556	376.817	395.128	359.608	358.098	371.75	377.648	366.252	357.641	370.927	349.222	385.261	392.953	367.081	385.825	371.246	400.21	374.636	398.206	428.358	359.547	342.696	391.482	366.531	340.976	353.421	363.443	368.391	401.962	369.522	373.376	319.592	376.133
ENSG00000102144_PGK1	82.4869	90.8367	96.5813	355.388	338.833	372.175	444.344	364.424	306.919	372.722	321.751	360.622	377.25	370.844	409.445	334.914	434.654	317.001	326.356	355.676	392.161	337.8	328.444	385.556	362.269	387.827	386.582	375.584	381.352	390.385	413.4	328.427	313.954	471.06	381.364	342.111	388.964	296.769	359.613	345.731	379.378	320.531	412.371	306.428	334.457	317.3	373.067
ENSG00000115738_ID2	78.2909	86.5444	119.906	329.325	365.928	292.442	410.384	614.097	648.767	293.238	342.459	316.28	295.024	549.896	303.209	313.187	416.841	333.697	531.636	295.508	635.867	579.623	323.473	551.353	295.849	534.958	399.656	322.777	467.966	537.941	415.039	333.657	287.831	394.843	291.208	313.156	448.883	376.145	277.015	298.861	323.732	317.014	421.753	345.859	531.777	346.496	483.51
ENSG00000156976_EIF4A2	83.4715	90.4967	99.2362	328.865	352.657	361.804	395.37	412.286	317.897	351.244	348.245	357.25	397.47	421.419	416.854	321.958	391.052	325.724	362.17	345.154	424.242	395.062	332.278	453.211	355.379	448.681	379.373	370.18	352.549	480.462	380.658	314.881	293.599	447.615	359.083	377.208	369.474	306.416	355.494	338.709	374.58	319.917	410.749	308.84	407.139	316.824	379.308
ENSG00000198563_DDX39B	87.1589	92.0873	96.1367	378.904	355.35	321.253	374.257	394.808	389.851	340.591	359.326	375.002	350.502	405.813	368.005	398.167	296.925	394.406	437.146	357.796	402.619	383.891	354.545	414.599	363.156	372.477	324.236	348.013	292.524	421.348	320.695	362.28	376.898	330.294	351.701	364.035	311.495	383.284	368.694	376.369	384.766	355.802	346.596	392.765	372.126	368.896	324.687
ENSG00000215021_PHB2	88.3412	92.7652	94.9278	411.823	379.011	408.248	354.863	350.332	373.595	393.191	352.95	361.558	330.069	372.853	375.839	401.694	347.836	376.068	375.061	372.22	351.66	363.92	362.458	373.08	374.157	348.67	349.373	395.782	369.902	340.51	345.182	418.621	417.052	336.543	324.03	355.882	366.573	430.71	366.663	366.716	379.945	415.606	354.61	398.286	356.751	373.991	373.606
ENSG00000212802_RPL15P3	83.1192	91.8728	96.3056	367.806	373.225	382.898	367.176	366.273	372.012	364.91	386.248	372.569	409.559	331.957	380.318	276.006	385.405	304.108	337.211	366.345	319.808	320.332	370.439	331.473	417.258	327.066	428.528	414.831	384.675	334.037	341.53	368.006	341.379	325.772	419.101	408.589	380.865	375.577	394.532	343.707	385.549	325.661	325.914	351.42	322.416	418.525	339.734
ENSG00000182199_SHMT2	87.6356	91.5193	97.0375	362.165	422.25	348.501	375.533	362.695	388.971	361.861	330.312	354.472	379.813	374.16	344.952	379.796	404.161	388.989	416.823	367.255	355.031	388.201	391.965	339.068	357.848	353.594	369.492	330.063	447.354	341.278	356.748	361.363	414.616	326.989	331.075	338.175	387.838	413.368	349.525	386.364	364.899	380.552	327.712	411.139	387.997	359.152	383.584
ENSG00000198830_HMGN2	86.6975	90.4737	98.0223	393.285	333.518	384.562	328.554	357.405	315.044	378.754	351.799	355.439	366.014	358.728	347.126	380.756	363.253	392.001	346.702	403.462	342.001	352.059	405.884	365.313	337.623	396.066	356.738	376.203	347.055	417.634	360.537	336.004	399.815	398.184	346.219	375.251	378.131	413.93	344.793	351.257	345.449	392.119	349.663	377.435	394.595	298.091	393.277
ENSG00000139644_TMBIM6	88.2837	91.2168	94.1644	364.658	373.799	347.452	401.731	357.751	338.285	353.438	378.894	380.847	432.694	368.428	400.624	375.379	355.005	370.852	347.406	355.52	373.086	361.015	376.917	366.179	365.457	353.033	332.325	361.493	339.796	375.879	360.804	338.061	349.349	371.224	392.471	365.077	349.561	354.459	386.568	398.341	381.302	361.491	351.34	379.087	355.846	375.297	343.502
ENSG00000128050_PAICS	81.2476	90.5029	94.6353	393.734	331.358	362.356	328.139	329.581	323.941	385.249	356.122	367.705	313.027	371.737	372.935	408.072	393.422	262.186	302.515	357.173	347.84	307.649	384.151	368.787	369.239	336.992	374.849	387.919	254.291	377.985	350.838	292.291	276.437	398.562	258.031	422.398	334.724	369.563	378.727	396.523	408.267	361.667	312.028	359.544	364.243	372.65	319.249
ENSG00000011304_PTBP1	85.7265	90.1034	93.9237	360.468	362.223	360.359	346.482	380.168	381.721	358.727	329.467	358.464	338.372	373.479	355.823	372.789	324.503	371.271	383.326	348.23	410.24	388.128	358.031	398.708	357.024	376.204	322.968	360.305	341.714	371.883	341.25	375.793	363.396	333.411	361.069	327.419	315.95	375.4	366.562	382.625	349.882	386.022	329.956	396.528	363.069	356.719	319.756
ENSG00000165629_ATP5F1C	86.3156	90.2317	93.4508	396.328	308.564	401.024	364.914	342.142	344.469	374.978	411.536	373.397	376.254	316.023	369.814	355.559	380.223	355.587	315.681	367.063	361.476	349.353	370.265	345.89	393.28	349.909	364.376	374.772	335.097	350.282	372.274	345.053	354.991	363.645	336.218	376.85	324.219	360.276	340.603	360.378	373.938	371.02	371.103	353.905	360.365	389.807	332.613
ENSG00000008018_PSMB1	86.0704	89.0475	91.6688	371.808	287.14	365.445	338.704	378.971	335.171	356.874	398.829	355.789	384.042	359.081	356.209	366.815	372.165	352.246	353.165	343.342	360	357.284	323.909	353.116	342.747	401.166	348.995	350.824	314.212	376.857	349.09	341.302	386.376	377.491	356.171	366.256	332.03	331.438	350.256	360.288	363.61	361.199	361.123	354.5	375.126	347.099	342.671
ENSG00000205937_RNPS1	84.5791	89.1171	94.2449	351.963	328.645	368.368	356.895	393.34	359.599	387.61	297.496	362.583	342.267	387.643	356.042	394.672	333.992	379.346	367.898	346.701	390.44	376.16	354.63	387.577	331.62	375.367	324.938	341.477	315.279	377.253	342.655	372.301	399.296	385.157	351.748	337.022	333.854	337.263	360.085	357.413	350.467	382.082	343.864	373.25	350.627	321.829	304.255
ENSG00000163479_SSR2	84.7488	88.7471	92.2664	356.147	353.137	395.6	412.07	303.849	297.867	375.074	335.165	352.448	386.237	356.441	361.008	361.384	405.863	333.05	321.882	370.322	324.72	345.971	346.987	356.923	340.445	340.552	369.393	363.931	350.43	368.083	369.819	349.267	376.577	371.472	353.83	347.723	344.076	333.214	338.512	333.181	366.57	357.581	381.606	362.959	312.173	333.526	365.771
ENSG00000196305_IARS1	84.1018	89.285	107.16	344.971	331.927	351.032	309.864	268.529	355.267	351.775	445.169	463.706	375.119	335.797	354.262	430.813	361.783	443.926	331.054	367.226	326.623	338.236	462.083	320.961	372.575	343.466	324.642	414.805	436.554	318.944	321.567	382.533	358.397	309.169	453.878	422.117	354.665	420.354	459.483	488.686	454.721	355.805	348.168	355.883	385.313	446.857	390.416
ENSG00000178982_EIF3K	84.5754	88.3109	91.5264	382.913	334.415	338.107	360.442	322.681	353.855	365.048	351.244	368.675	367.415	357.654	325.646	364.141	345.971	398.72	280.388	370.477	356.554	352.291	314.586	370.322	337.378	347.944	340.748	366.458	338.886	375.299	333.209	347.779	417.7	361.101	361.916	348.552	302.275	361.65	342.339	352.632	358.229	370.75	346.069	394.261	361.108	314.501	326.029
ENSG00000230202_-	78.3233	88.137	95.2764	395.379	318.178	365.054	386.609	347.578	341.38	393.093	346.446	312.134	377.076	315.42	323.735	255.213	429.066	297.721	302.532	396.659	305.02	305.898	381.995	298.814	380.384	352.88	466.094	368.311	369.761	299.259	380.27	356.348	334.617	353.655	352.216	376.316	420.531	381.346	339.073	290.786	324.253	310.903	385.098	312.584	353.332	342.407	389.655
ENSG00000101361_NOP56	81.9486	87.4744	101.221	335.289	349.398	346.749	346.245	449.009	410.628	384.201	381.74	342.734	325.768	452.524	327.513	413.977	270.791	363.91	402.197	274.542	432.459	425.705	369.753	375.942	350.398	408.746	320.2	345.569	337.005	463.418	333.037	417.257	405.778	359.162	328.637	296.384	286.346	314.043	321.997	353.777	251.71	368.799	336.797	389.447	413.253	344.929	296.044
ENSG00000171314_PGAM1	83.5408	86.6204	90.9359	357.215	306.206	364.886	342.542	385.418	317.661	367.449	339.779	341.143	333.04	363.943	359.095	351.6	363.793	333.739	335.949	356.586	390.671	362.861	336.909	403.42	337.553	373.317	344.503	378.101	320.008	400.238	363.595	313.266	354.183	403.271	330.646	339.421	334.918	333.912	319.053	337.784	363.262	348.46	351.238	337.187	354.671	320.322	327.123
ENSG00000283498_MIR1244-2	82.5675	87.706	93.5211	347.118	329.696	335.251	362.56	403.913	340.433	325.273	353.764	331.357	388.538	386.387	351.469	294.086	404.538	341.805	345.096	351.057	390.846	350.591	286.277	373.465	355.921	404.149	374.291	348.532	325.699	399.766	376.128	305.634	337.754	378.493	329.908	363.635	363.012	289.964	363.782	293.8	339.859	310.243	356.906	298.017	356.672	346.311	376.934
ENSG00000179010_MRFAP1	81.1134	87.2994	91.4419	340.991	356.303	335.797	351.553	361.982	342.354	308.648	360.703	312.521	337.072	352.116	368.258	348.769	372.284	349.626	383.334	324.275	388.468	355.663	322.919	334.94	299.327	361.4	334.213	314.028	387.008	367.029	370.888	350.405	388.997	360.403	306.906	345.245	347.118	324.991	294.494	313.993	312.397	376.552	369.345	344.587	357.562	307.579	376.472
ENSG00000115541_HSPE1	83.7465	87.5652	91.1953	371.651	311.272	368.418	293.195	372.093	321.55	350.239	403.896	333.509	340.958	356.229	339.418	343.704	349.878	363.375	329.107	359.068	359.803	348.96	350.283	382.287	327.054	380.822	350.831	364.728	329.558	401.862	364.799	344.192	380.992	377.619	329.147	363.047	339.813	372.48	341.044	314.557	356.562	340.846	351.096	345.078	353.227	322.085	323.598
ENSG00000060138_YBX3	83.6721	86.8027	91.2133	355.094	380.852	331.745	345.557	342.591	334.019	367.296	328.604	330.301	338.275	364.736	346.543	341.436	373.78	376.892	336.698	373.7	332.718	342.316	360.174	358.905	337.532	378.885	365.561	328.39	402.22	364.892	347.879	355.174	364.332	340.729	323.897	330.414	380.373	352.989	324.947	321.772	343.564	361.179	338.811	361.264	364.632	324.945	387.412
ENSG00000134684_YARS1	83.0964	87.8593	90.0884	335.985	360.407	335.359	351.958	297.059	322.992	357.168	371.463	335.969	343.508	336.931	320.257	383.356	354.249	366.6	347.757	364.026	308.794	341.559	359.134	313.43	341.251	354.628	324.022	314.741	364.948	323.848	337.616	349.374	366.652	327.855	354.822	372.326	314.618	360.06	350.917	360.195	353.391	383.181	331.395	358.829	363.447	355.581	369.544
ENSG00000137309_HMGA1	82.0544	86.6543	92.0248	342.536	372.546	360.813	353.079	371.607	385.984	366.064	279.577	338.362	320.292	357.185	338.975	356.363	332.874	371.666	378.363	344.591	376.945	364.012	348.817	365.005	318.625	343.566	304.237	322.142	379.779	345.473	324.69	382.994	386.638	321.619	347.761	303.243	358.701	377.459	327.463	318.392	336.325	360.356	330.482	368.778	312.653	344.581	344.711
ENSG00000160014_CALM3	78.1238	86.1372	91.3122	331.535	379.902	349.259	329.573	365.374	364.874	345.676	291.457	306.911	299.108	358.806	309.117	353.791	315.005	355.046	370.263	342.573	380.078	375.255	329.007	389.573	309.535	348.213	400.218	324.617	355.431	374.334	342.493	349.128	368.607	348.501	297.786	277.318	330.951	338.944	310.491	311.659	298.713	351.884	315.368	368.434	386.05	311.397	343.421
ENSG00000101856_PGRMC1	83.1209	85.8753	87.8914	354.974	305.747	356.728	295.75	353.249	333.25	349.105	365.877	350.607	332.347	346.333	341.396	331.572	346.839	351.885	339.979	348.582	352.09	361.775	329.287	348.042	349.195	358.339	321.083	361.878	338.04	349.317	337.438	329.144	328.323	337.516	318.736	368.309	332.894	345.606	333.41	340.844	357.063	350.141	346.752	331.966	337.124	320.331	338.318
ENSG00000143933_CALM2	79.9024	86.3242	89.5022	367.178	327.651	361.911	285.541	319.157	291.871	300.332	438.906	322.524	393.405	356.587	343.316	353.752	395.926	312.499	288.663	335.82	264.324	323.147	340.165	347.533	259.337	353.615	352.709	354.204	309.193	356.441	319.435	350.532	380.607	320.133	336.134	395.063	361.033	358.483	299.309	343.03	322.768	330.898	352.202	349.666	347.278	369.632	378.738
ENSG00000117592_PRDX6	82.9292	85.5441	88.1423	365.993	305.362	356.311	338.785	329.576	329.641	338.861	366.22	351.09	346.97	331.974	351.315	346.847	332.894	371.348	309.522	342.306	335.216	352.987	339.202	370.633	348.771	338.225	331.631	362.539	297.548	350.22	313.24	327.212	350.301	332.315	349.735	365.113	322.026	332.537	354.038	358.113	367.895	351.294	326.109	349.308	341.019	342.047	314.256
ENSG00000197451_HNRNPAB	78.0114	85.2587	90.2911	337.268	380.324	330.028	279.362	358.523	395.497	313.357	354.351	292.338	301.848	369.049	294.285	341.638	322.894	337.52	372.951	312.649	369.307	348.569	345.362	348.256	300.293	353.424	311.401	312.184	421.681	351.331	348.777	352.218	368.263	315.621	285.142	311.999	340.432	361.883	298.684	306.194	302.225	363.335	330.95	359.011	372.234	318.37	386.224
ENSG00000167553_TUBA1C	79.3363	85.9648	96.812	393.899	301.36	328.303	343.507	319.801	317.693	327.546	280.063	410.738	366.121	332.368	413.542	333.602	335.039	387.593	352.467	492.324	430.901	353.708	337.253	488.537	336.302	298.244	361.526	344.212	284.695	357.478	317.229	377.092	349.169	294.528	369.984	301.078	267.219	323.645	386.213	424.109	381.046	429.693	300.653	398.617	296.25	435.582	253.485
ENSG00000164104_HMGB2	79.1759	84.1256	88.331	351.993	327.185	338.045	326.555	340.189	307.842	341.296	361.547	316.672	326.212	341.485	303.58	333.055	381.379	341.432	303.531	331.646	311.809	342.391	334.606	335.616	305.203	374.775	379.633	316.797	347.104	357.251	353.399	337.388	342.573	397.384	328.044	375.03	381.066	312.21	302.728	305.384	316.048	330.745	353.098	323.663	378.445	301.033	379.211
ENSG00000169230_PRELID1	81.0549	84.3775	88.615	345.029	331.484	333.871	308.855	383.144	381.674	339.524	305.239	323.391	316.272	371.933	308.298	356.302	332.15	358.612	354.212	334.107	378.541	382.935	312.49	343.536	304.916	334.954	317.828	356.616	341.172	354.543	345.053	341.335	394.244	336.29	345.804	310.043	327.016	341.112	326.705	336.081	313.24	341.746	338.73	399.006	335.86	322.155	330.985
ENSG00000108654_DDX5	80.0427	83.7413	88.8601	312.21	301.797	305.456	334.569	390.62	335.361	298.784	388.987	291.221	326.457	431.864	286.283	346.392	344.264	331.574	358.849	328.079	410.104	408.276	318.829	398.398	316	356.075	338.018	324.919	324.024	406.545	323.538	336.793	310.522	350.506	325.119	336.433	347.067	325.007	319.507	356.149	324.816	339.496	336.301	310.623	423.255	322.161	353.536
ENSG00000178741_COX5A	80.0296	84.1709	87.392	317.822	349.035	349.156	314.945	441.19	303.455	327.116	422.224	355.692	370.047	322.64	345.967	305.112	334.832	359.514	314.653	329.589	399.082	323.671	317.684	343.815	343.207	327.323	320.104	339.829	304.918	317.628	349.705	368.341	331.793	345.96	338.653	420.164	327.429	301.803	342.312	396.284	337.195	320.161	339.164	329.709	305.861	336.172	396.927
ENSG00000146066_HIGD2A	80.4578	83.5922	86.2402	337.393	326.745	341.563	393.179	346.093	307.462	315.005	296.124	334.979	336.095	331.44	348.112	338.349	353.337	326.317	315.708	338.398	339.878	336.306	302.09	356.189	325.507	305.474	329.744	321.335	360.92	325.4	357.983	332.267	356.733	380.328	323.427	323.321	315.134	312.407	336.939	333.329	340.55	312.606	371.755	333.759	308.059	349.379	335.125
ENSG00000213585_VDAC1	80.4351	83.3594	87.0866	319.341	322.176	337.23	318.085	323.849	317.413	332.361	357.006	352.161	351.601	331.011	361.12	339.861	325.207	332.474	320.815	321.719	339.437	334.402	316.621	359.663	342.647	334.994	321.806	356.388	309.008	330.93	343.021	319.458	331.009	353.38	342.124	350.122	314.182	322.907	363.304	358.248	354.277	338.973	338.254	315.799	329.553	340.179	314.673
ENSG00000196683_TOMM7	76.2879	83.4067	94.4147	333.273	330.058	280.322	390.09	399.262	303.533	270.314	310.007	329.587	351.074	352.32	351.452	276.68	500.963	271.449	322.494	311.663	328.347	320.853	291.465	350.346	333.981	398.792	380.017	325.56	428.307	359.609	417.238	294.178	318.589	401.454	338.033	358.352	435.836	259.633	348.866	326.254	337.238	283.529	381.755	284.254	370.584	282.425	388.682
ENSG00000256393_RPL41P5	76.0613	83.3775	89.0534	334.799	318.921	359.09	356.861	371.372	330.384	353.665	405.802	280.782	384.992	317.272	344.266	193.347	424.256	257.793	284.883	323.534	265.447	295.463	348.838	238.301	337.714	357.544	460.391	327.319	349.913	291.249	333.762	376.404	319.66	340.729	344.089	412.503	402.344	344.527	333.258	229.071	321.05	273.609	302.97	308.071	354.27	314.647	333.098
ENSG00000205581_HMGN1	74.6032	82.9475	94.7157	337.249	363.378	331.875	378.211	404.576	308.819	333.677	331.705	329.349	302.764	394.688	272.66	275.578	403.636	264.376	351.669	270.94	372.593	387.763	327.76	379.08	260.22	415.742	354.944	315.102	410.56	376.114	381.557	298.825	327.275	431.304	291.636	370.902	415.641	264.286	326.951	293.357	301.489	259.741	334.82	298.276	327.93	270.932	430.506
ENSG00000250182_EEF1A1P13	73.2757	81.7644	89.3469	332.109	307.467	317.883	370.507	356.387	344.631	327.222	357.721	345.879	447.592	297.114	355.344	203.443	367.836	249.802	310.788	338.112	264.867	285.89	330.426	280.187	421.999	296.842	445.756	396.36	337.222	292.554	297.59	327.214	270.276	286.995	429.973	375.581	363.209	310.946	412.044	326.331	326.901	254.371	292.938	288.011	293.597	355.81	312.285
ENSG00000110321_EIF4G2	76.6943	81.9184	85.542	372.842	300.828	353.949	287.782	307.208	271.485	329.785	367.504	364.934	316.924	304.282	306.634	347.414	305.834	342.447	286.209	307.638	344.803	309.73	341.332	334.329	321.56	323.99	328.725	365.883	326.66	337.486	335.205	331.629	275.318	302.626	308.071	336.757	303.061	366.349	300.586	331.299	322.198	366.636	347.706	328.687	340.939	313.09	320.352
ENSG00000161547_SRSF2	74.3413	81.5231	86.783	317.173	324.872	336.371	299.79	354.487	347.637	293.864	325.848	323.935	331.407	349.384	321.977	327.833	240.08	385.443	326.337	303.896	356.645	345.339	328.274	404.781	307.411	333.68	258.951	322.409	294.899	372.652	229.181	326.415	334.623	249.828	296.557	305.06	267.644	334.98	345.617	362.11	288.743	353.431	264.073	369.557	349.57	309.43	278.677
ENSG00000186010_NDUFA13	74.0548	81.4863	90.2126	346.405	397.276	279.41	306.819	380.686	411.548	353.276	282.541	275.658	293.49	307.391	294.474	337.456	331.764	324.601	358.632	301.454	345.12	327.289	262.238	312.377	308.327	375.742	347.9	310.69	485.54	363.149	347.232	360.887	376.31	314.92	304.213	282.996	377.988	334.415	284.051	276.696	301.756	308.667	288.95	379.495	360.74	287.621	390.517
ENSG00000164924_YWHAZ	76.2624	80.3472	93.2162	349.553	326.149	369.743	346.395	421.878	300.583	266.476	345.277	391.07	302.615	369.004	314.046	319.15	316.751	319.212	280.656	303.213	319.159	380.936	332.988	327.057	331.135	305.725	311.953	321.221	285.021	383.215	315.92	286.278	280.443	443.113	389.551	387.306	296.298	254.056	306.393	381.546	453.585	385.071	304.825	334.392	319.775	373.906	321.557
ENSG00000189343_RPS2P46	74.4467	82.6366	88.3053	361.718	314.726	329.894	348.405	335.323	366.943	353.225	311.3	335.109	395.432	280.536	336.296	230.832	352.479	266.921	303.18	353.21	267.307	282.51	331.199	280.701	403.245	298.005	424.737	406.011	364.115	276.614	309.414	341.801	303.919	281.178	391.429	343.663	351.532	341.371	383.258	297.714	311.33	256.845	306.939	306.076	287.36	359.267	308
ENSG00000173915_ATP5MK	75.7283	82.2797	86.5946	318.748	288.179	314.176	302.764	360.764	298.691	334.574	355.628	314.994	330.162	310.137	360.147	287.591	328.076	303.359	279.814	345.429	351.883	330.359	309.264	346.695	335.838	336.394	344.117	391.655	284.324	348.534	340.243	278.269	321.949	345.042	335.382	343.346	291.781	302.289	352.166	351.514	350.597	311.023	346.889	313.57	299.522	321.497	298.815
ENSG00000168385_SEPTIN2	79.197	80.7118	85.3334	343.316	303.423	318.268	283.918	348.334	288.273	317.443	357.288	327.359	321.362	326.667	316.803	350.12	343.762	324.012	306.8	303.786	325.139	335.099	319.168	320.901	340.799	320.686	316.612	329.328	309.446	321.682	334.658	326.335	314.042	342.648	317.87	341.512	320.729	317.837	344.752	352.421	334.261	347.479	315.524	344.452	316.783	338.679	312.265
ENSG00000214389_RPS3AP26	73.6073	80.3674	87.8731	338.422	291.217	332.831	350.873	319.81	326.875	325.627	362.154	315.695	385.78	314.635	328.454	214.415	386.297	261.231	287.712	363.766	264.084	276.713	330.614	289.415	367.072	292.527	416.391	351.699	336.609	300.135	314.11	324.897	307.204	310.552	352.792	391.985	357.442	318.408	358.859	292.457	319.82	255.078	309.909	266.078	323.119	313.631	333.153
ENSG00000104549_SQLE	74.9012	79.3219	85.3128	326.956	307.051	336.49	373.386	315.355	254.757	336.746	306.108	318.351	329.555	304.114	358.418	295.97	338.914	279.82	281.704	317.166	321.997	312.42	299.32	348.666	315.785	353.499	360.928	355.308	292.458	352.997	352.202	281.465	264.791	431.889	325.644	323.161	334.991	287.219	314.302	303.796	342.03	300.459	380.977	254.627	317.409	295.256	305.814
ENSG00000112695_COX7A2	76.0141	79.2976	82.1408	298.261	302.032	328.616	338.76	341.136	274.016	305.797	292.61	300.768	326.522	314.012	345.131	276.425	382.951	303.476	307.846	311.738	317.549	323.404	301.932	318.105	321.835	321.7	328.406	335.516	314.1	345.162	358.576	316.256	352.298	375.129	310.656	319.379	326.609	258.689	315.445	327.392	310.414	292.798	336.742	293.013	316.832	306.545	319.315
ENSG00000136149_RPL13AP25	71.4916	80.5786	88.3276	336.687	300.757	326.82	353.668	339.378	358.558	341.156	336.342	336.602	385.105	284.146	315.174	210.258	352.238	272.237	314.415	356.05	264.109	282.686	336.441	267.696	359.547	285.491	379.189	357.395	333.312	284.67	296.82	331.05	300.512	287.392	370.793	359.445	371.051	317.809	363.822	287.563	283.586	262.577	284.976	299.448	288.71	345.442	314.976
ENSG00000135940_COX5B	73.896	78.5671	81.3288	323.273	298.341	299.982	298.716	344.735	331.229	324.491	294.507	281.203	307.437	326.203	293.026	307.749	340.145	319.539	297.4	310.366	318.197	328.666	303.913	318.093	284.859	335.183	306.242	286.635	323.904	338.188	315.49	318.571	350.196	321.104	278.948	293.752	326.534	321.497	275.977	294.979	271.184	297.481	320.513	313.047	325.59	293.685	337.139
ENSG00000166986_MARS1	74.2105	79.3844	83.4056	286.496	337.722	292.155	346.798	302.843	340.84	304.334	332.603	320.046	294.135	317.916	291.455	331.838	298.494	349.316	321.238	308.743	295.664	347.266	337.025	291.644	309.73	299.082	284.515	286.146	319.18	287.857	296.291	320.902	352.905	270.467	316.175	322.678	307.729	324.635	317.159	333.823	308.937	337.943	308.007	346.007	336.004	323.912	333.02
ENSG00000124207_CSE1L	73.5448	79.3993	84.3153	321.309	282.46	335.726	293.707	263.533	255.349	329.491	357.094	338.205	346.102	279.167	341.535	318.855	328.55	317.777	290.148	323.02	282.164	298.543	333.007	307.321	338.159	295.597	313.924	347.591	289.043	300.35	307.93	283.66	277.425	330.946	330.908	360.943	310.918	301.956	340.671	343.999	365.99	330.769	317.417	292.659	310.65	337.773	314.6
ENSG00000198931_APRT	73.6297	78.9009	82.9659	310.029	316.972	317.644	303.868	366.322	341.505	307.937	274.766	293.15	278.091	346.635	298.486	311.181	314.234	332.045	332.971	317.098	343.852	327.915	294.241	321.726	302.316	330.721	288.008	286.065	342.457	320.128	311.304	337.913	360.615	312.788	277.28	265.276	311.713	331.32	278.503	281.709	295.35	338.128	325.755	389.041	318.032	290.815	321.762
ENSG00000149136_SSRP1	74.9277	78.3592	81.3104	331.541	302.649	310.675	290.123	284.406	317.293	321.014	340.397	318.42	292.276	313.977	312.737	342.933	296.59	312.333	304.001	321.868	304.729	318.21	297.731	299.212	301.207	340.186	275.305	312.897	312.373	290.181	314.788	346.237	348.794	285.148	292.371	325.246	326.51	335.07	319.369	294.047	316.117	308.45	309.534	344.342	328.055	325.229	324.297
ENSG00000273716_-	70.4004	78.403	86.0654	368.743	273.497	340.084	315.151	323.073	347.73	339.534	350.013	323.51	431.522	286.345	321.331	237.734	333.484	233.159	258.992	326.52	224.544	229.754	312.254	301.19	313.889	277.124	452.034	337.55	300.663	250.794	310.832	313.335	287.279	286.744	363.351	372.89	350.451	383.399	378.456	261.544	280.02	302.628	345.654	298.981	278.384	334.731	299.157
ENSG00000185825_BCAP31	75.0322	78.2872	82.4173	302.313	294.822	286.555	330.805	321.843	358.032	312.32	320.489	309.143	308.122	316.136	295.105	297.27	298.924	326.897	307.347	321.553	344.565	326.747	300.388	343.144	314.838	319.276	269.819	318.575	313.978	351.766	300.042	352.565	383.315	282.99	330.594	308.692	281.219	331.631	326.787	301.234	348.537	301.693	286.017	380.884	302.734	293.515	303.274
ENSG00000085662_AKR1B1	75.9029	78.086	81.1045	312.254	296.51	295.418	296.78	312.14	333.487	298.701	312.624	309.974	311.527	334.447	304.149	324.095	312.739	328.418	338.742	299.656	338.414	327.83	303.433	332.471	302.355	320.036	282.549	312.434	320.185	323.533	299.62	313.042	361.397	302.768	306.685	308.495	306.504	318.449	307.116	326.537	310.071	324.526	296.925	351.745	321.729	322.255	305.58
ENSG00000227063_RPL41P1	75.3324	77.3748	81.2162	334.023	303.232	342.867	332.684	304.401	300.155	316.956	310.113	278.478	303.07	322.222	304.994	307.324	356.521	312.391	295.345	316.321	302.427	304.865	306.171	298.47	275.892	313.293	356.321	300.964	344.454	306.859	330.181	312.335	342.46	323.339	306.499	335.908	325.373	311.353	290.9	272.404	292.305	297.311	350.279	300.671	316.679	308.886	323.3
ENSG00000128524_ATP6V1F	75.2551	77.5199	79.7655	316.033	316.665	310.618	317.691	311.809	326.04	318.344	272.322	292.482	293.05	308.663	298.079	322.713	309.542	301.729	330.165	307.891	320.216	336.282	297.146	307.289	285.971	307.952	315.028	303.631	336.229	308.346	321.996	315.114	350.983	316.79	297.736	269.977	319.301	314.503	288.45	296.013	300.784	304.168	319.569	341.068	308.454	304.067	316.01
ENSG00000104738_MCM4	74.0617	77.3385	79.3208	302.47	291.231	304.094	289.002	332.009	280.983	300.317	315.34	321.387	320.662	322.486	320.32	308.106	294.541	304.337	299.675	297.922	310.31	321.264	302.372	340.046	309.69	309.32	295.917	315.154	272.447	311.962	297.237	299.881	276.117	326.485	309.86	321.105	285.029	282.264	313.719	316.466	317.555	309.387	311.082	294.935	318.883	309.614	276.394
ENSG00000166226_CCT2	73.817	77.0234	79.3323	305.548	268.009	311.557	252.603	310.499	274.129	292.245	357.092	318.231	329.966	295.263	311.692	299.536	305.724	312.759	293.483	299.135	315.877	296.059	317.802	300.416	314.102	307.404	282.504	319.621	268.392	295.283	328.166	308.783	298.122	288.49	315.911	360.088	291.521	309.172	305.664	327.917	326.312	314.228	277.75	309.639	318.52	331.919	296.876
ENSG00000187109_NAP1L1	72.7352	76.466	81.1991	293.542	296.704	309.49	331.221	285.264	262.934	317.69	377.54	322.497	379.172	272.321	372.558	319.282	325.252	293.637	285.366	329.425	272.14	287.714	301.111	293.38	344.427	323.43	306.055	331.75	305.673	308.105	301.137	286.777	284.769	300.024	331.402	383.39	305.488	279.072	340.628	299.217	321.037	312.492	317.217	273.013	307.479	290.128	301.262
ENSG00000170515_PA2G4	72.8734	76.2621	79.6776	323.529	268.422	344.271	268.676	293.608	274.697	330.767	319.228	301.361	300.911	304.488	308.293	337.818	277.921	313.404	289.426	318.954	294.396	292.177	313.217	307.39	307.964	308.261	281.583	318.817	255.665	318.39	280.717	319.455	348.838	291.266	296.885	327.178	271.395	319.35	299.784	292.895	311.934	313.548	299.392	305.609	308.524	304.286	278.523
ENSG00000130811_EIF3G	68.5629	76.2406	83.2787	338.046	349.603	333.115	275.626	326.737	357.83	331.932	272.469	263.224	247.545	337.451	273.793	328.475	262.403	324.561	339.972	331.181	325.315	311.03	310.645	300.917	289.407	295.822	279.847	286.013	358.44	305.178	283.163	358.387	383.182	269.605	252.454	257.762	297.83	349.177	265.177	270.386	266.034	333.114	286.244	353.149	304.747	284.744	306.384
ENSG00000204256_BRD2	71.6639	75.9337	81.5121	281.516	292.848	303.989	337.599	402.878	314.799	312.284	277.593	312.635	286.398	343.419	332.381	335.613	255.392	319.901	328.098	296.477	393.583	362.874	308.543	386.094	287.43	380.773	270.904	268.368	260.611	379.033	285.813	303.48	285.955	311.199	305.096	299.02	279.194	287.656	317.017	291.155	318.987	299.179	301.949	297.36	311.951	287.874	271.857
ENSG00000113407_TARS1	71.9872	76.2792	79.4033	302.471	304.656	297.594	303.875	241.839	254.816	290.989	372.03	312.344	328.787	271.774	304.331	312.898	320.888	290.817	272.1	310.75	249.729	281.785	308.088	257.481	311.281	278.601	308.092	295.229	322.872	287.027	324.195	286.574	290.781	317.897	284.895	363.439	316.76	311.896	305.577	323.572	316.559	290.714	324.853	310.036	293.989	325.402	332.231
ENSG00000205609_EIF3CL	68.448	76.7335	83.0957	336.016	276.674	328.202	272.831	258.836	295.513	338.706	322.53	308.281	306.441	271.37	307.427	350.791	258.79	346.526	300.531	333.776	285.988	302.542	344.352	280.286	315.317	299.495	256.561	315.399	267.661	284.458	250.033	345.806	352.785	253.993	306.41	321.581	261.972	344.56	310.75	326.744	319.965	361.372	249.545	352.417	297.976	315.013	265.095
ENSG00000184110_EIF3C	69.5916	77.1641	82.9304	332.405	280.536	329.352	263.31	259.399	297.592	338.051	317.634	308.026	302.34	280.137	305.564	353.899	256.281	352.184	302.572	338.687	277.776	309.426	349.07	282.304	325.283	295.65	257.678	309.286	267.855	287.502	246.038	341.045	358.087	250.09	310.072	326.503	269.548	350.16	312.042	329.672	310.6	358.736	253.556	352.217	296.225	321.508	270.908
ENSG00000170144_HNRNPA3	71.4035	75.7548	80.2762	321.715	313.712	285.573	264.327	288.392	269.579	338.004	323.617	286.458	290.995	311.005	281.332	307.845	317.086	285.737	311.383	257.381	233.496	324.016	342.083	292.319	275.868	350.55	307.324	280.312	302.887	326.541	301.277	302.022	303.64	312.12	302.026	340.712	330.275	319.274	308.399	302.494	279.428	303.151	301.995	273.297	332.153	246.459	327.274
ENSG00000179091_CYC1	69.9642	75.2912	78.4032	305.81	319.676	299.552	305.343	324.312	333.138	301.712	276.117	289.907	275.33	306.836	274.416	317.787	314.377	292.501	305.737	278.925	324.552	310.229	309.369	311.32	273.339	316.495	297.801	285.589	336.593	297.553	318.523	303.628	352.37	285.021	266.833	242.957	279.842	302.749	300.468	276.807	281.664	300.618	276.288	324.454	262.999	279.9	308.768
ENSG00000116560_SFPQ	72.8533	75.3416	81.194	287	331.874	292.866	287.454	347.291	293.989	297.706	331.436	294.242	284.025	372.671	274.301	325.46	254.525	315.897	324.718	309.231	312.088	321.255	309.092	363.593	294.277	349.717	296.171	290.152	296.528	355.627	284.058	303.134	299.599	298.117	297.737	306.232	288.206	287.719	298.007	333.891	290.929	310.3	307.078	310.466	362.502	265.571	324.795
ENSG00000150753_CCT5	72.238	75.6463	77.8	323.077	281.307	303.586	281.364	280.625	277.827	302.39	335.923	273.898	342.542	285.024	310.826	302.669	308.032	306.628	302.501	301.716	303.201	305.127	313.046	306.178	288.586	301.25	317.444	290.049	295.54	291.248	300.428	310.088	320.249	279.878	295.192	310.592	285.147	309.295	311.325	312.896	285.663	290.509	288.065	319.053	332.504	316.791	302.349
ENSG00000277791_PSMB3	72.6067	75.1952	77.9114	315.512	276.09	296.515	290.267	300.426	318.239	299.015	294.787	297.818	299.824	287.678	287.239	312.1	277.147	320.563	300.545	314.342	327.739	313.008	303.847	314.959	301.016	304.043	276.314	304.345	290.908	293.044	307.899	318.369	333.915	288.558	292.418	299.928	261.447	307.912	304.214	302.344	276.639	310.282	302.587	330.461	289.169	301.452	274.262
ENSG00000106682_EIF4H	72.2528	74.9925	77.2619	288.592	323.347	287.478	308.112	301.652	307.14	310.869	258.748	291.951	252.567	322.186	294.95	304.9	309.359	298.575	310.367	290.269	305.549	307.144	305.495	297.462	272.977	328.205	294.234	267.996	331.067	303.043	315.196	299.756	304.308	315.246	277.24	279.519	318.322	299.169	276.402	293.636	285.128	300.244	293.449	299.475	300.184	264.827	313.656
ENSG00000235552_RPL6P27	67.2879	76.1926	80.4208	310.501	275.244	331.541	298.502	315.734	308.286	318.773	323.176	301.168	369.231	268.752	313.505	232.672	308.027	258.875	258.091	319.054	253.594	257.261	309.809	253.089	349.41	291.878	358.919	359.585	286.362	285.854	268.07	307.83	280.466	265.531	335.937	346.934	321.759	338.547	321.456	270.351	308.602	261.603	264.154	280.249	272.783	329.095	301.711
ENSG00000131473_ACLY	70.8564	74.9189	78.51	306.011	276.062	319.742	271.154	306.007	288.302	316.179	305.436	291.253	275.473	288.262	298.286	336.337	265.972	318.626	308.934	299.003	327.445	320.081	301.289	324.889	290.828	306.933	258.877	301.324	267.127	317.328	282.71	302.515	300.348	282.323	291.834	296.836	269.785	314.997	288.041	308.046	288.358	324.614	273.609	317.735	311.169	285.572	257.436
ENSG00000062485_CS	70.7815	75.1144	79.6039	281.702	291.707	303.794	284.012	278.563	278.571	309.875	310.129	323.355	303.413	281.585	329.671	340.904	269.583	321.485	288.685	299.528	307.143	297.495	323.367	301.387	339.165	289.771	260.216	306.048	255.128	295.858	264.261	312.784	295.112	275.52	333.392	312.341	282.831	299.334	319.401	334.907	306.139	319.656	289.094	315.46	291.602	326.598	265.561
ENSG00000166136_NDUFB8	65.2954	74.6267	76.9895	297.98	302.54	299.77	260.074	315.161	305.889	299.033	255.432	259.863	279.039	310.604	239.413	304.735	244.273	301.24	354.953	304.418	345.455	277.829	260.323	305.506	268.403	323.347	295.304	263.758	332.534	286.088	301.044	299.637	351.391	296.1	240.133	249.212	308.647	325.386	267.328	244.141	198.635	301.622	275.699	309.867	317.451	225.616	285.667
ENSG00000171530_TBCA	68.7057	74.1863	81.6251	301.814	262.867	314.514	290.398	282.373	240.392	305.223	327.372	316.787	329.513	293.147	292.01	295.101	328.831	276.749	271.394	313.94	266.995	311.093	307.819	285.13	274.181	326.687	329.904	293.437	266.424	328.112	325.942	272.514	305.64	350.948	278.673	349.565	328.807	279.831	264.116	268.817	298.39	278.951	344.242	245.693	307.881	271.758	327.589
ENSG00000134308_YWHAQ	71.9612	74.3114	76.6574	303.221	277.767	306.101	265.31	290.309	272.923	297.849	317.771	296.642	294.738	296.064	306.325	287.542	287.182	316.622	280.143	283.014	311.086	307.646	289.284	311.025	294.902	306.731	290.842	304.841	286.415	307.234	300.389	275.569	283.064	310.959	288.754	310.931	290.095	298.042	296.137	299.281	311.474	298.05	302.633	278.675	316.728	289.641	303.336
ENSG00000141756_FKBP10	64.5114	73.7537	77.7276	309.405	377.292	298.082	315.341	308.686	298.749	322.747	207.8	249.483	245.946	317.952	291.74	311.018	256.661	312.78	300.487	302.488	293.799	294.835	311.561	291.792	245.075	310.588	277.447	247.603	332.689	295.194	286.981	334.22	344.319	284.137	256.212	227.354	290.516	298.112	249.078	252.756	262.199	310.302	290.196	334.301	274.646	243.818	298.529
ENSG00000168209_DDIT4	68.1072	74.2128	88.4648	320.66	549.957	310.259	507.018	236.537	275.425	345.331	204.485	279.105	285.592	294.485	330.234	268.139	441.394	282.461	299.391	323.241	247.594	271.735	308.192	253.363	268.328	356.702	428.456	274.51	539.738	283.271	410.416	310.889	329.278	435.638	276.144	237.343	494.987	280.974	281.733	289.721	302.556	299.217	368.932	268.951	240.57	233.681	451.298
ENSG00000124562_SNRPC	71.8682	74.0182	77.7842	307.703	307.498	315.763	286.939	296.292	275.911	293.749	321.152	289.73	293.283	311.871	289.075	330.97	321.186	308.581	272.439	303.314	289.711	321.795	309.367	325.239	279.469	290.961	295.853	286.678	281.687	296.939	307.911	311.18	322.497	289.317	289.534	277.245	283.295	311.006	283.814	282.826	293.965	313.23	301.399	338.765	286.276	296.366	289.725
ENSG00000088986_DYNLL1	71.0083	73.8052	76.3223	303.574	280.521	289.591	283.968	304.172	295.11	279.7	284.503	279.154	276.504	295.202	282.798	297.147	316.867	297.946	289.735	268.771	305.163	322.07	288.305	309.325	252.865	284.227	285.789	303.584	309.135	323.142	321.246	266.949	302.911	313.933	286.071	290.292	305.331	315.393	279.827	304.057	282.239	307.442	308.143	295.239	303.628	298.596	292.878
ENSG00000100650_SRSF5	69.3555	73.0867	80.1371	300.912	261.002	307.1	333.838	341.508	299.363	313.776	315.54	257.273	276.327	341.76	260.659	277.304	281.976	293.314	318.433	320.844	318.372	332.058	291.535	337.416	270.502	350.471	289.225	284.616	290.304	358.917	274.013	321.167	293.158	278.018	278.949	305.609	277.776	319.66	263.68	278.295	261.317	273.525	285.289	285.191	353.005	263.406	324.054
ENSG00000100380_ST13	71.3436	73.551	75.4697	299.299	280.741	310.008	286.078	247.834	246.908	301.718	322.702	296.525	297.071	274.381	307.187	308.442	311.615	302.006	260.33	298.652	264.317	294.13	295.841	277.093	285.14	301.605	292.484	294.278	292.065	286.087	301.932	273.082	286.078	299.499	293.092	315.771	308.794	296.945	292.078	286.992	301.566	306.872	290.907	265.106	289.316	281.165	310.127
ENSG00000147224_PRPS1	69.4036	73.645	81.5909	324.66	282.827	275.672	327.424	293.579	265.715	318.377	292.137	336.513	296.602	295.772	334.709	288.239	295.582	270.175	260.414	265.777	299.381	323.781	255.914	333.281	276.665	352.537	301.842	338.813	264.248	325.432	280.464	304.511	281.787	289.276	332.308	336.215	290.763	256.904	335.015	290.316	326.674	275.639	284.004	286.899	308.322	340.263	271.966
ENSG00000175063_UBE2C	71.5766	73.5998	77.5229	290.585	289.66	298.487	289.152	304.394	288.905	297.001	284.173	280.022	306.376	314.904	286.455	294.672	278.489	319.729	286.257	295.477	306.946	289.999	298.747	324.461	272.913	292.077	288.646	274.401	279.329	318.85	310.259	294.996	330.879	319.905	294.756	294.127	289.852	291.133	270.923	277.567	313.009	311.431	309.59	334.661	315.568	284.423	275.482
ENSG00000197746_PSAP	69.6673	72.9245	75.4136	273.336	332.069	277.295	335.15	295.317	299.805	279.497	273.235	272.833	281.856	290.418	294.893	296.219	314.303	288.114	284.681	272.543	316.455	297.831	279.911	302.271	282.78	305.769	290.834	267.174	315.554	292.562	317.201	294.579	293.386	325.171	280.199	272.562	310.347	269.133	278.393	286.188	275.381	286.186	296.972	293.561	293.5	255.353	305.734
ENSG00000130726_TRIM28	66.3935	71.8924	80.2894	283.069	322.179	291.276	268.923	343.594	351.585	283.864	259.886	262.479	241.298	330.165	247.6	311.067	250.503	327.171	329.192	276.051	327.056	326.597	276.769	316.249	263.256	314.211	256.613	273.105	317.415	308.059	276.523	334.009	328.438	273.578	259.105	250.019	269.219	309.075	268.797	291.361	258.853	318.093	264.499	368.986	303.961	271.529	292.573
ENSG00000129351_ILF3	67.7817	72.1316	77.2769	310.657	317.725	288.748	277.842	331.605	303.762	285.201	279.351	264.01	244.043	317.972	298.229	349.861	274.179	280.157	307.35	275.489	292.37	290.285	303.318	265.304	270.109	288.304	230.2	264.298	308.811	320.455	264.707	349.566	287.797	267.489	294.476	262.138	279.011	309.034	247.68	285.955	258.507	310.18	278.115	310.839	316.895	289.83	309.132
ENSG00000084623_EIF3I	68.6726	72.338	74.9327	292.181	233.977	285.625	262.348	276.218	291.971	281.391	327.353	292.455	308.675	283.756	317.753	307.765	309.022	297.083	263.892	300.874	299.469	273.494	273.292	301.544	293.801	265.281	274.181	291.343	270.309	299.818	281.715	270.165	308.442	324.892	287.362	298.976	283.376	286.191	285.004	293.396	294.171	296.928	283.011	304.379	273.788	266.65	276.837
ENSG00000165502_RPL36AL	70.392	71.8735	75.4954	307.34	283.73	285.657	308.857	295.996	295.418	300.701	281.598	257.523	263.636	296.07	273.504	275.273	323.194	284.034	283.711	282.017	286.403	276.982	285.49	286.038	277.901	306.546	303.504	281.558	321.617	290.796	293.1	292.992	322.081	318.232	293.119	299.49	314.879	276.429	269.884	263.423	282.04	288.611	317.413	287.951	287.037	280.223	302.409
ENSG00000147123_NDUFB11	70.3191	72.1495	74.7813	269.899	281.244	282.01	305.279	297.273	307.014	286.542	291.969	282.919	307.453	294.437	276.486	307.1	304.061	272.75	285.533	296.184	309.925	298.707	281.374	291.021	279.082	279.069	292.033	299.265	298.642	287.129	286.626	286.297	318.811	281.39	263.034	271.331	290.335	280.381	272.608	306.11	290.886	285.087	324.605	306.919	274.545	287.411	289.785
ENSG00000100504_PYGL	69.0894	71.7309	72.9771	287.009	272.425	293.238	296.262	261.679	252.531	290.931	289.225	292.709	300.199	287.842	292.724	286.438	296.702	278.936	273.32	278.369	267.99	277.83	290.931	275.883	288.375	285.14	286.838	285.521	277.782	288.274	287.193	272.029	271.506	301.06	285.861	302.168	287.958	273.008	287.851	291.141	296.388	284.74	296.95	271.994	292.164	273.157	284.428
ENSG00000173207_CKS1B	66.329	71.488	74.2807	250.362	300.64	269.359	333.968	279.678	267.186	261.595	258.647	289.857	297.476	281.652	296.074	277.987	331.379	253.61	288.678	264.692	295.637	264.615	263.789	289.019	278.222	279.867	310.469	267.434	321.284	287.065	324.327	246.021	297.472	346.581	285.681	289.497	294.34	228.617	278.923	303.044	292.982	271.461	318.915	259.665	262.371	286.223	294.035
ENSG00000111229_ARPC3	68.7838	71.7838	73.5036	288.587	273.235	287.467	297.314	278.71	262.095	293.031	304.17	274.016	290.731	289.276	287.39	263.817	300.755	264.577	269.277	281.259	285.846	287.06	274.404	300.173	293.076	289.129	294.327	287.211	281.589	300.899	299.093	265.803	294.985	316.135	272.417	308.942	282.914	271.628	279.28	292.712	281.02	260.807	302.39	279.571	289.583	282.936	277.33
ENSG00000075415_SLC25A3	64.9218	71.3621	75.4991	288.914	289.87	285.725	300.884	346.092	279.541	317.826	239.559	277.626	242.889	283.797	312.104	286.204	260.553	261.757	301.138	290.501	283.936	301.534	257.76	285.171	282.967	259.398	301.767	317.297	197.939	350.734	259.108	276.804	249.985	305.499	363.103	285.921	318.598	226.95	348.98	291.983	309.243	258.226	302.073	284.761	272	247.74	240.636
ENSG00000102119_EMD	67.6676	70.7154	74.3129	298.281	270.551	291.18	296.544	297.654	292.933	301.301	254.714	271.028	276.035	297.521	272.663	291.115	255.299	284.201	281.491	308.913	324.191	268.364	271.857	313.429	272.671	295.633	297.488	305.159	274.934	264.479	288.191	294.856	304.372	300.356	263.234	231.379	279.507	274.859	263.195	281.522	295.869	288.853	280.582	260.588	257.883	287.342	267.367
ENSG00000188229_TUBB4B	62.0756	70.5895	78.478	291.655	310.275	279.673	273.883	327.096	333.003	273.274	219.71	244.935	216.9	355.777	244.035	292.976	263.887	300.058	322.889	265.366	356.969	314.322	279.587	339.844	233.303	321.697	259.417	248.51	321.466	338.864	281.045	283.672	316.388	280.28	224.977	212.3	262.151	305.012	239.897	248.233	235.105	300.545	283.746	312.681	293.451	231.295	300.674
ENSG00000168439_STIP1	67.3027	70.9025	74.1817	281.015	273.26	285.701	246.962	280.925	283.962	292.144	310.461	287.792	254.483	264.268	262.529	304.877	264.014	296.091	281.671	295.58	311.085	296.939	308.556	279.491	267.861	280.832	265.861	257.93	283.229	279.151	291.046	293.865	292.038	294.726	266.106	300.241	274.337	300.056	266.523	292.251	261.938	299.828	282.076	307.932	300.282	283.258	300.305
ENSG00000186298_PPP1CC	68.6911	71.1592	74.3062	272.935	262.099	276.891	270.11	274.92	268.481	267.566	327.249	298.985	304.777	280.831	296.153	288.965	287.479	281.685	270.142	274.712	288.302	286.622	281.686	289.841	310.074	294.716	271.988	294.576	280.197	282.533	290.218	269.702	272.036	292.409	298.857	325.182	282.652	275.765	305.442	315.579	308.668	276.022	286.824	267.347	281.505	297.616	297.582
ENSG00000115677_HDLBP	67.482	70.6284	72.9837	286.964	286.579	282.639	294.544	249.706	254.74	286.349	283.259	299.136	263.529	261.168	282.388	314.628	274.586	284.864	282.034	276.943	269.261	285.163	304.628	267.303	278.747	282.652	269.922	253.636	276.251	268.812	269.401	295.328	292.43	308.972	277.794	274.651	293.541	299.175	279.75	300.206	269.946	290.451	274.124	304.64	284.471	266.939	282.689
ENSG00000204388_HSPA1B	58.3704	70.4489	81.536	284.848	273.136	301.378	228.238	468.26	302.893	313.571	194.32	266.491	288.347	423.162	312.679	302.588	206.66	310.532	343.248	298.258	430.365	343.096	278.743	467.312	251.437	457.356	224.926	256.113	227.694	476.383	219.108	336.027	338.856	249.958	268.756	220.565	219.625	243.376	272.907	257.443	269.27	330.335	222.131	286.664	311.605	199.271	230.184
ENSG00000096746_HNRNPH3	67.258	69.6518	73.1938	281.158	269.015	271.596	281.489	269.963	268.026	265.014	283.361	275.051	256.761	288.252	257.012	274.822	316.866	287.19	288.357	258.677	259.539	271.999	286.917	274.781	268.652	327.859	312.644	262.267	353.104	287.195	319.017	295.269	276.057	300.218	269.085	286.804	323.614	273.808	259.31	282.031	275.989	283.654	305.107	275.488	294.248	256.503	329.698
ENSG00000164111_ANXA5	68.2376	70.6655	72.6624	283.22	250.219	293.279	293.163	282.104	259.809	280.913	310.614	272.988	292.038	291.073	278.577	286.991	289.378	272.26	261.402	272.043	299.094	279.658	279.262	294.49	294.84	274.373	274.254	285.089	256.644	285.935	279.619	266.975	267.473	291.914	289.345	310.38	283.629	274.614	272.938	278.924	287.59	270.032	271.893	284.969	286.841	294.45	284.815
ENSG00000153187_HNRNPU	65.286	71.7356	75.9999	335.064	264.033	281.083	243.351	247.783	267.435	301.64	363.615	293.898	266.258	238.423	285.721	315.982	227.342	290.776	261.351	306.902	309.071	275.703	304.623	248.496	329.38	253.385	258.445	307.634	261.075	309.319	251.446	295.391	253.949	250.034	288.164	295.131	275.675	298.329	297.467	302.128	264.026	278.483	298.307	318.683	295.145	314.193	274.4
ENSG00000089597_GANAB	66.1942	70.1898	71.4984	282.372	272.661	284.38	298.389	271.149	265.877	284.378	263.919	280.342	271.928	257.716	271.543	309.103	245.428	290.796	290.309	278.907	282.326	280.59	288.203	282.888	286.155	288.595	232.524	280.09	248.963	281.803	245.521	293.149	291.412	257.041	283.94	264.41	243.377	274.987	283.728	280.928	285.509	295.806	243.794	300.803	283.567	271.137	250.991
ENSG00000105438_KDELR1	68.1435	70.4158	73.4123	274.571	296.038	271.731	298.573	279.167	284.097	273.858	272.88	290.928	290.351	287.635	295.042	283.908	280.445	294	261.693	262.125	282.881	273.814	276.402	321.819	301.434	272.472	264.841	293.944	269.1	276.53	270.722	273.419	292.765	279.246	295.636	285.8	257.168	267.593	291.249	285.983	299.57	294.363	277.971	292.27	263.806	309.623	268.939
ENSG00000079246_XRCC5	66.4374	69.951	73.7294	303.561	230.916	298.857	251.458	242.84	239.866	292.353	332.156	295.196	286.093	246.19	299.514	298.323	281.146	284.883	249.868	286.236	259.41	271.408	278.461	265.09	300.024	278.209	264.301	304.31	255.401	275.561	274.684	275.782	266.474	284.476	292.776	329.857	267.047	274.793	294.081	293.885	303.28	291.385	271.289	265.508	284.857	303.671	275.166
ENSG00000242071_RPL7AP6	62.656	69.9393	75.6679	302.436	252.314	277.514	300.804	317.635	289.555	305.502	305.028	250.11	302.75	246.59	282.001	207.383	318.408	231.262	252.008	293.778	219.679	240.959	288.581	234.933	304.115	274.484	352.362	306.844	293.47	248.237	272.638	274.745	250.684	266.467	309.929	319.87	336.803	285.476	293.409	225.053	267.471	235.099	270.541	250.604	261.601	297.65	297.866
ENSG00000215301_DDX3X	64.6073	69.7286	80.1233	243.285	280.283	259.11	258.202	395.751	325.147	246.065	323.167	268.106	260.845	354.584	269.682	273.138	278.674	256.454	341.788	247.52	378.079	352.225	253.331	374.818	269.006	376.178	277.8	273.297	281.064	371.587	300.095	248.76	208.155	310.277	279.155	287.213	284.296	261.13	272.551	292.373	284.092	255.405	312.47	256.054	395.466	255.854	302.247
ENSG00000185787_MORF4L1	65.8901	69.2119	75.7429	257.888	307.392	276.42	278.489	303.087	280.661	258.625	299.21	276.895	271.119	312.108	260.673	255.441	312.735	257.877	276.8	267.788	302.625	288.68	271.825	302.182	269.829	309.517	307.642	261.796	312.879	289.159	337.965	269.979	268.113	328.978	260.52	291.452	314.662	253.533	263.565	268.793	263.182	263.559	302.154	261.619	295.228	268.987	339.46
ENSG00000022267_FHL1	66.5905	69.1967	72.155	266.533	275.194	255.329	295.952	282.769	250.467	264.058	281.348	285.274	267.762	273.084	287.854	274.781	289.695	262.746	257.645	267.113	291.751	296.396	258.04	278.978	280.046	270.864	286.333	276.792	290.372	281.154	300.903	254.648	249.137	314.051	288.875	284.578	291.902	266.835	260.582	310.19	267.963	260.883	301.196	266.305	269.12	276.781	286.041
ENSG00000002586_CD99	63.7181	69.3906	73.3512	268.888	305.809	275.899	283.613	285.86	295.782	259.925	254.051	236.799	251.589	301.008	243.859	264.182	300.525	263.976	293.426	262.669	286.544	280.875	263.158	276.535	251.246	296.193	302.631	251.083	302.309	278.59	295.059	281.038	284.882	292.52	262.272	233.915	295.88	279.307	245.196	243.279	242.279	258.827	297.082	257.335	278.834	241.367	293.34
ENSG00000174231_PRPF8	62.039	70.311	73.5021	273.488	246.505	282.911	273.605	256.213	235.954	293.523	291.948	301.919	272.018	241.544	291.347	331.23	217.656	300.52	272.224	279.577	275.593	287.938	301.343	285.154	304.51	269.998	216.88	290.824	209.104	267.165	213.57	285.659	253.109	228.387	299.798	288.852	214.462	277.887	294.171	310.221	299.152	308.721	224.922	299.036	284.741	287.431	206.069
ENSG00000114867_EIF4G1	63.2918	69.6422	76.1304	296.848	268.755	288.455	253.646	302.159	334.283	281.203	274.112	249.544	227.878	296.355	238.888	304.203	229.12	303.67	331.214	290.886	336.78	332.924	299.715	311.343	253.008	304.628	242.476	267.962	261.19	304.9	275.934	331.076	290.646	232.536	254.809	252.257	244.54	313.573	263.268	268.616	242.792	332.56	251.789	324.066	299.212	259.403	265.942
ENSG00000159352_PSMD4	66.2525	68.9814	72.5137	282.314	269.142	291.238	271.736	267.375	282.606	292.052	269.464	258.368	257.774	289.257	256.509	302.886	264.966	302.233	279.096	276.966	278.18	268.589	271.483	284.892	256.04	296.106	274.761	259.733	286.006	286.311	281.62	274.885	313.47	273.256	258.722	267.829	291.253	291.708	265.144	263.877	258.293	308.732	259.01	296.418	287.885	255.79	290.321
ENSG00000165672_PRDX3	66.5277	69.1876	71.8468	258.825	251.639	265.849	270.738	279.4	250.047	256.312	292.432	276.877	281.555	270.094	294.763	277.362	293.958	288.125	270.698	264.495	295.806	271.752	276.295	295.957	276.624	271.949	265.781	276.292	274.327	283.226	303.517	252.158	262.957	289.219	277.413	290.5	274.003	266.896	285.174	290.991	284.317	265.779	284.23	256.941	291.082	278.721	284.564
ENSG00000156467_UQCRB	63.0464	69.1259	72.2086	274.827	280.091	266.154	319.245	255.728	250.628	276.857	285.536	281.187	312.831	261.436	277.197	242.398	318.6	249.396	226.072	276.3	253.247	279.17	236.972	229.227	288.024	286.645	318.283	272.339	278.664	276.707	319.704	254.205	251.832	322.446	289.104	293.082	304.092	280.445	262.301	261.465	257.348	228.446	327.698	238.588	242.448	248.746	316.368
ENSG00000069275_NUCKS1	65.998	69.3833	74.0233	277.525	252.296	282.335	238.318	254.099	223.308	268.621	326.647	303.041	290.501	259.08	296.921	292.976	284.552	293.61	259.598	277.686	256.024	262.422	301.375	275.959	305.264	277.542	262.449	293.261	259.637	269.585	275.103	272.736	249.079	280.571	298.99	321.02	275.263	270.079	312.545	323.925	297.446	303.325	269.239	274.613	287.987	288.063	276.426
ENSG00000161203_AP2M1	65.6251	69.0473	72.8784	317.243	291.66	280.351	261.972	296.266	288.665	270.832	280.874	285.856	260.48	296.067	258.237	302.355	264.244	281.738	277.169	269.416	291.888	304.184	278.587	274.132	258.562	275.958	264.086	272.003	276.421	294.789	254.705	285.807	310.576	240.96	248.356	291.019	252.573	291.075	260.945	269.44	268.809	306.261	260.999	318.151	274.397	266.068	260.21
ENSG00000131747_TOP2A	65.0966	69.408	72.0851	269.06	251.137	288.686	241.957	245.342	218.168	277.893	343.553	293.611	298.93	264.301	291.916	289.159	274.374	279.058	239.373	271.198	259.081	258.208	288.206	267.65	286.153	254.439	270.651	278.194	249.439	272.557	283.051	268.952	232.859	285.904	291.319	337.074	273.245	269.191	284.207	298.173	297.618	282.812	281.107	258.29	277.371	288.385	285.062
ENSG00000163931_TKT	65.5321	68.9459	72.5587	275.874	281.936	273.872	295.769	266.576	335.503	286.892	224.975	262.582	243.009	308.276	277.479	288.592	292.625	271.909	290.035	331.093	286.434	279.643	265.763	279.7	250.361	275.256	244.031	269.901	292.133	258.474	262.745	297.42	293.285	260.061	290.301	238.706	271.797	275.693	261.977	299.209	252.746	288.162	252.657	295.24	268.044	279.776	259.268
ENSG00000126602_TRAP1	66.5484	68.7327	72.3211	298.613	292.833	274.749	276.934	274.63	292.96	303.565	253.603	265.892	256.238	279.597	264.506	278.271	255.421	290.428	294.328	271.006	280.008	285.853	285.275	274.035	258.586	271.856	242.869	267.097	296.8	272.396	282.191	301.564	304.592	270.458	265.312	256.955	275.415	291.846	270.611	283.75	263.43	277.317	261.052	303.867	275.113	273.99	269.272
ENSG00000117632_STMN1	63.1824	67.9787	75.3912	256.228	251.395	256.756	244.271	251.503	240.801	252.707	306.801	319.705	264.555	265.362	288.383	262.109	294.166	260.254	241.123	293.317	252.798	324.467	269.994	288.089	238.279	303.487	249.996	257.342	274.424	284.26	381.302	238.346	289.751	250.318	321.389	302.064	349.038	322.712	262.805	239.577	274.815	266.67	300.066	273.836	298.214	322.382	347.205
ENSG00000143575_HAX1	65.1405	68.718	70.9448	268.433	254.941	278.617	271.252	239.934	287.114	297.78	251.101	268.685	273.111	254.777	273.955	299.213	301.211	298.285	277.936	276.834	248.843	271.921	292.644	244.026	261.898	267.749	281.004	258.572	279.217	270.436	267.932	277.126	333.708	275.788	255.579	276.745	272.093	288.27	247.642	255.112	260.117	284.199	277.695	282.519	294.213	281.24	292.866
ENSG00000177606_JUN	50.1154	56.0765	98.447	190.618	421.261	209.485	370.146	479.938	495.844	218.435	147.618	210.309	230.177	457.237	255.368	188.077	300.966	202.036	478.241	216.756	512.361	428.276	210.426	401.669	186.036	476.332	299.685	177.901	453.454	436.159	293.114	215.796	214.468	311.758	205.748	195.377	336.085	171.446	199.946	194.834	209.312	202.008	290.07	188.763	358.473	156.292	346.982
ENSG00000108424_KPNB1	65.4366	68.28	72.624	261.757	263.379	272.266	249.211	263.166	241.548	276.792	315.463	292.325	290.744	259.231	287.221	294.985	268.204	281.629	258.613	296.159	251.795	266.414	295.68	254.391	289.753	267.003	260.158	280.402	253.592	254.686	263.465	276.775	253.883	287.431	291.95	315.275	265.058	273.466	294.903	293.487	300.958	285	261.743	272.774	285.644	288.891	267.577
ENSG00000138385_SSB	65.8109	68.0867	69.7388	284.993	229.951	279.156	227.518	273.155	244.886	281.164	379.568	269.623	269.484	264.235	271.477	277.823	269.635	273.537	239.71	289.35	260.296	263.54	271.1	263.145	260.026	272.419	257.553	279.575	246.414	289.543	275.501	268.793	278.354	273.509	272.057	345.876	280.977	281.142	269.144	254.643	275.846	273.806	277.245	252.117	290.92	272.274	277.84
ENSG00000182944_EWSR1	63.8711	67.9303	70.575	249.928	271.961	284.716	243.949	274.759	260.728	303.094	273.801	266.985	246.781	264.671	273.387	310.887	218.137	301.694	271.481	259.69	283.093	274.264	295.895	260.027	279.92	256.414	253.363	278.376	242.321	267.353	234.054	299.357	286.448	221.996	268.617	277.421	241.713	304.343	274.014	276.474	271.385	294.317	233.099	320.954	271.331	278.815	255.175
ENSG00000152234_ATP5F1A	50.7699	68.1772	76.4337	323.309	173.059	321.74	217.14	268.591	293.221	274.712	175.44	179.098	321.473	272.074	315.366	170.188	307.815	292.808	231.917	164.387	391.154	247.85	274.319	296.166	198.393	287.161	253.888	335.592	239.704	302.027	316.547	245.664	190.499	270.904	328.111	283.189	174.233	225.845	172.252	295.281	310.982	273.344	157.382	283.432	239.898	306.971	147.639
ENSG00000090861_AARS1	63.1989	67.6412	74.8111	208.948	351.511	203.015	337.632	228.155	301.163	204.323	269.643	270.926	258.908	231.163	258.804	292.154	311.444	278.861	260.084	257.646	268.212	295.566	267.199	248.943	193.047	294.518	286.08	228.015	370.705	270.204	302.174	303.106	228.899	295.562	271.183	265.315	332.828	263.681	286.096	256.652	250.107	280.856	290.397	301.678	300.47	251.51	328.954
ENSG00000116288_PARK7	64.6207	67.4189	70.652	273.996	261.352	277.159	249.453	297.252	269.825	261.895	297.466	254.212	257.414	277.734	258.236	267.13	300.043	257.833	271.983	254.844	283.46	281.101	247.928	304.852	259.219	285.855	281.483	253.531	276.512	304.987	286.988	259.273	297.164	282.855	263.198	266.638	281.868	262.23	246.524	258.238	260.815	265.28	269.526	272.859	279.19	254.762	284.898
ENSG00000224631_RPS27AP16	60.3608	67.4108	74.1349	274.475	236.115	237.05	281.502	325.76	263.946	270.138	298.068	258.46	332.259	243.07	252.456	145.64	365.154	202.968	256.369	269.66	235.423	231.454	295.438	221.258	326.004	291.746	393.678	296.906	288.783	240.901	269.626	268.295	252.077	271.338	303.432	335.326	344.826	245.012	289.316	206.458	254.382	206.249	273.334	233.906	284.315	256.112	299.559
ENSG00000131876_SNRPA1	57.692	65.7484	71.9584	241.127	252.518	227.005	299.258	268.539	278.195	280.667	217.795	288.26	227.249	246.704	234.993	272.447	311.429	240.506	269.177	292.295	252.369	270.67	213.011	276.056	226.54	255.446	289.794	211.124	308.495	296.159	316.83	261.966	283.315	309.998	227.407	253.567	315.327	189.344	211.384	268.427	229.36	263.076	286.554	246.336	262.911	224.967	327.003
ENSG00000130175_PRKCSH	62.231	67.1585	70.6572	276.366	313.604	269.479	268.609	273.155	290.48	305.797	232.985	255.697	261.073	280.281	248.189	277.714	233.341	288.348	283.054	281.352	258.414	268.658	280.591	277.974	275.439	267.512	243.303	267.871	284.673	274.916	238.275	304.27	332.651	225.412	235.631	236.173	237.784	291.331	256.245	261.462	251.491	299.16	233.265	326.269	251.128	241.665	257.019
ENSG00000124795_DEK	62.3323	67.0073	69.9767	251.794	260.574	278.072	255.277	235.265	221.988	267.368	341.446	277.548	281.666	241.906	274.003	244.604	283.048	252.803	222.894	264.214	224.16	248.929	268.126	248.57	290.956	255.453	281.023	275.153	274.778	248.987	297.289	250.357	234.219	285.104	270.284	334.205	284.758	257.414	267.932	280.518	271.314	255.973	274.964	232.704	274.198	268.31	282.571
ENSG00000167552_TUBA1A	62.1207	67.1836	70.8339	263.887	241.274	247.969	268.756	279.653	336.344	338.347	254.73	262.359	294.704	273.406	274.938	272.194	222.161	251.808	260.242	296.464	279.613	290.811	230.142	276.945	294.658	285.673	268.713	318.78	230.145	266.41	235.181	313.464	272.423	250.025	334.2	245.982	229.703	282.807	283.512	267.611	271.189	243.994	211.867	252.978	251.443	277.384	245.588
ENSG00000111481_COPZ1	63.9671	66.2905	68.7011	258.732	268.333	250.773	292.952	252.894	238.361	250.966	264.692	268.434	266.704	257.786	275.048	248.203	293.861	275.096	247	254.84	265.632	251.315	255.792	262.368	279.299	260.287	279.975	260.081	274.071	269.053	290.499	249.007	256.097	308.952	270.227	260.188	291.244	249.026	283.29	266.781	271.174	261.039	301.161	261.483	268.396	260.716	268.574
ENSG00000041357_PSMA4	59.9159	67.0093	71.2243	272.759	250.226	285.035	182.556	229.297	209.723	272.536	348.726	277.896	206.264	247.19	256.862	278.664	249.274	304.925	226.85	293.56	206.493	252.545	337.81	244.858	284.482	169.042	237.932	330.704	246.811	196.229	263.253	279.999	331.41	296.338	268.75	268.819	302.898	257.684	262.803	344.249	277.558	301.547	267.325	219.437	198.226	274.007	278.847
ENSG00000178952_TUFM	60.5918	65.733	72.6203	270.595	292.049	263.094	253.104	269.98	319.367	270.05	243.464	231.498	231.679	289.645	234.799	290.76	242.371	291.5	303.057	254.132	295.149	284.43	272.317	259.707	232.45	278.736	233.334	238.093	303.485	267.261	260.676	297.29	318.513	244.281	235.706	231.104	261.561	299.342	238.408	251.284	225.43	286.928	250.002	299.373	262.769	242.366	275.335
ENSG00000102225_CDK16	60.9602	66.2779	72.7051	283.901	272.742	252.962	258.353	329.15	265.824	319.836	223.537	238.522	226.836	279.018	262.718	330.743	235.392	264.131	308.94	274.916	281.23	275.305	250.295	309.975	237.908	260.595	247.607	253.47	272.395	300.403	240.546	260.38	291.642	242.585	302.739	230.178	264.399	249.466	271.822	297.301	236.942	275.767	288.355	312.027	294.462	223.651	222.502
ENSG00000165704_HPRT1	62.2292	66.8518	71.7065	292.953	230.061	300.778	244.586	245.824	216.147	287.51	330.285	275.29	311.149	259.203	290.336	259.695	259.683	272.281	229.54	300.77	259.563	261.755	270.844	268.618	280.454	293.894	260.499	301.588	218.713	283.993	248.774	249.344	276.629	257.292	284.775	316.49	245.166	261.489	281.432	268.674	316.848	266.197	248.424	236.89	275.242	264.675	240.456
ENSG00000146731_CCT6A	63.5915	65.9933	67.7183	268.052	231.612	267.377	226.357	263.882	230.18	258.239	313.304	277.576	281.101	257.481	276.264	257.261	272.12	268.112	247.907	259.424	270.086	255.647	253.832	268.789	264.106	277.835	257.868	280.169	245.458	264.064	273.86	253.172	244.493	263.609	267.873	293.629	252.145	254.818	263.799	269.941	277.532	254.215	265.878	247.181	271.135	264.098	255.984
ENSG00000219200_RNASEK	60.2171	65.6192	70.3508	250.629	255.266	304.091	282.617	302.65	298.073	224.859	287.259	292.221	240.538	266.395	241.86	221.929	263.82	266.309	271.508	254.551	277.002	249.315	255.258	293.675	261.133	192.284	277.761	276.405	271.771	245.617	268.854	186.133	258.045	255.64	290.393	237.93	232.063	177.447	291.251	159.644	289.876	242.386	272.144	271.852	209.565	297.393	217.181
ENSG00000227081_-	58.7164	65.4961	72.9518	300.265	238.296	298.405	279.397	274.421	273.754	261.345	307.406	259.85	291.826	250.893	250.558	195.372	287.604	223.476	230.83	286.999	201.165	231.246	279.144	241.235	291.75	253.793	342.251	315.394	221.368	233.722	260.466	297.471	262.623	230.985	319.831	345.118	278.539	283.75	287.211	214.08	292.361	215.535	259.133	221.087	246.763	326.995	261.34
ENSG00000204435_CSNK2B	60.9665	65.7657	71.4332	286.549	246.841	246.521	255.522	248.392	254.867	266.248	273.144	286.747	305.57	261.728	283.285	200.432	231.016	292.644	239.193	261.506	268.136	264.398	247.53	275.708	290.647	238.53	247.977	302.298	238.115	252.584	239.433	265.938	198.357	239.875	282.34	240.817	243.567	296.812	281.146	290.226	274.024	294.257	267.54	289.126	242.761	326.959	244.763
ENSG00000165637_VDAC2	62.0293	65.0358	66.7118	249.606	241.106	244.127	266.861	254.784	234.456	232.042	271.981	282.825	266.805	264.384	289.009	247.621	283.856	262.016	240.819	295.645	251.593	280.604	228.772	255.532	263.513	266.428	254.972	265.016	245.737	263.02	264.68	240.09	255.308	284.462	265.374	323.268	260.91	229.323	259.377	262.708	284.446	253.274	281.02	249.823	255.829	236.7	258.726
ENSG00000044574_HSPA5	58.7757	63.2328	70.0592	220.635	261.502	226.969	310.408	296.028	236.884	252.449	217.956	251.616	250.837	308.357	267.897	250.75	264.963	271.662	250.273	244.079	321.899	271.155	235.334	329.531	217.363	351.655	293.163	182.98	249.482	333.219	281.021	230.941	259.285	311.674	247.867	262.339	266.114	189.755	233.453	235.026	253.413	243.045	277.884	218.462	292.126	196.391	274.816
ENSG00000146677_RPL32P18	55.7109	66.1314	70.3292	282.053	256.36	277.022	281.539	268.334	288.821	278.415	280.65	261.194	308.91	210.531	255.508	172.009	276.795	201.802	226.686	284.042	206.504	213.871	267.858	230.39	308.023	219.334	329.066	317.108	273.633	233.849	222.244	279.102	245.28	211.252	306.631	306.358	269.256	259.782	273.639	207.996	276.842	196.679	256.706	218.744	228.207	306.208	224.643
ENSG00000169714_CNBP	56.9283	64.1008	69.6502	226.108	299.761	212.598	269.822	273.323	259.42	238.58	293.119	307.679	217.07	277.14	217.4	263.556	311.864	213.816	293.635	250.352	272.992	236.916	207.685	220.586	254.93	274.5	233.099	226.662	306.673	250.324	359.059	212.13	233.531	342.479	212.112	249.328	328.696	259.749	231.348	243.783	277.062	230.868	272.976	213.876	257.876	279.088	281.357
ENSG00000078369_GNB1	62.9044	64.6902	67.1045	240.607	261.551	237.897	280.688	252.624	253.732	246.804	258.255	260.395	253.419	248.673	255.028	267.37	270.749	257.279	259.266	247.578	271.188	265.548	241.942	268.767	272.863	245.069	266.084	253.979	271.317	264.596	272.439	242.922	243.913	276.225	255.616	254.611	259.479	246.166	259.5	279.1	261.945	252.905	275.149	264.231	251.282	270.778	256.468
ENSG00000186480_INSIG1	59.9054	64.2108	70.846	235.625	235.159	260.907	285.962	272.65	219.267	257.429	248.51	268.27	282.742	244.806	327.148	242.496	267.77	240.445	244.385	244.973	268.133	253.648	237.702	286.035	276.147	305.116	286.372	272.057	225.337	285.976	266.136	224.911	225.218	331.725	283.598	256.258	244.529	216.93	296.085	271.421	289.616	239.347	296.135	206.771	248.148	231.186	254.209
ENSG00000163938_GNL3	60.771	64.695	66.5668	263.041	229.088	272.991	229.232	260.4	223.671	270.908	302.946	260.578	278.383	255.677	289.49	268.158	229.49	266.285	228.749	255.619	259.278	236.594	266.215	251.191	259.414	267.676	260.621	258.282	220.895	263.54	260.745	260.955	241.861	274.73	258.093	292.807	234.116	246.754	250.94	255.726	277.899	253.371	265.944	237.313	250.654	247.71	237.059
ENSG00000166710_B2M	61.4349	64.5191	67.0373	248.152	244.339	256.53	267.269	249.615	236.687	237.656	292.508	259.649	284.06	248.206	269.328	251.657	281.608	243.653	220.184	252.466	259.623	246.063	260.533	248.055	246.309	238.18	268.008	243.552	245.632	256.056	284.335	241.255	246.685	282.021	260.159	284.363	272.146	268.032	260.539	275.638	271.99	240.415	264.583	240.439	264.058	268.188	261.144
ENSG00000167863_ATP5PD	61.8814	64.3932	69.2523	251.31	253.623	248.427	281.83	282.243	242.119	254.965	278.887	254.746	282.943	265.674	256.449	247.225	304.917	242.012	241.227	239.094	238.908	264.774	227.236	255.632	272.102	258.27	284.876	271.342	265.038	251.773	279.151	241.133	257.448	291.286	268.283	286.39	274.907	240.699	261.328	277.71	256.202	244.787	288.922	232.579	253.206	257.697	257.753
ENSG00000172053_QARS1	62.219	64.8694	68.064	275.648	260.909	259.24	273.415	246.53	258.641	304.291	301.564	245.063	251.561	244.709	266.444	290.452	231.449	269.755	272.894	296.447	251.126	267.082	236.043	245.494	260.32	250.266	250.06	265.504	265.308	244.844	247.767	285.238	310.822	231.411	256.146	255.325	250.367	256.619	266.976	287.07	263.955	296.944	245.806	270.342	259.715	249.221	248.761
ENSG00000106105_GARS1	60.2633	64.6085	69.8251	268.91	256.557	267.026	242.924	212.028	239.008	256.949	315.061	277.654	289.575	224.432	249.163	254.124	279.405	280.592	252.129	265.635	207.513	234.794	290.327	229.205	266.275	245.634	250.737	275.433	221.867	225.913	222.064	273.488	278.814	240.733	247.523	313.414	242.014	289.023	252.923	262.086	281.453	287.942	259.919	289.68	235.009	316.108	278.987
ENSG00000105281_SLC1A5	57.4293	64.2359	67.1264	265.768	264.034	258.419	257.381	267.597	285.689	270.637	221.942	220.839	223.373	249.909	233.961	266.104	231.296	269.855	296.436	268.313	248.258	285.016	266.185	256.506	241.286	257.946	204.223	250.883	269.245	258.47	222.139	262.773	282.546	209.558	217.394	214.809	229.191	286.358	238.291	231.522	228.848	273.334	207.903	279.276	268.57	240.978	238.937
ENSG00000169976_SF3B5	60.913	63.6754	67.4584	270.265	234.718	268.539	247.914	296.254	251.442	259.135	213.558	253.605	243.039	277.638	239.298	242.742	237.307	257.166	248.905	270.369	285.982	263.003	253.603	283.737	245.218	242.419	256.96	286.133	243.798	281.951	244.369	249.438	308.456	265.349	244.484	245.115	226.097	255.798	271.069	255.88	257.078	242.439	263.963	285.022	243.603	260.115	219.915
ENSG00000116754_SRSF11	58.9571	63.8014	69.306	254.823	249.78	271.731	230.517	248.821	206.271	268.287	315.945	287.088	276.772	235.807	278.93	271.613	204.128	268.03	224.051	269.188	235.892	239.848	276.15	249.829	280.687	255.588	225.09	277.375	212.33	231.81	221.985	252.819	228.152	242.505	280.588	283.346	222.497	285.491	288.827	282.55	288.652	273.53	242.714	259.01	253.749	270.445	238.145
ENSG00000105323_HNRNPUL1	60.5886	63.4861	66.5841	268.99	275.877	245.202	240.152	254.116	254.577	283.792	233.02	260.101	226.899	265.728	245.288	269.967	238.944	267.408	269.006	242.262	260.913	261.669	279.081	251.397	253.773	248.56	249.223	236.666	268.845	265.053	241.084	269.162	255.027	242.631	241.101	237.604	259.494	260.618	242.165	246.904	263.567	266.699	247.272	266.539	252.957	237.476	244.65
ENSG00000102393_GLA	55.8847	63.7235	68.9601	294.142	192.559	275.144	208.1	254.215	277.694	275.573	281.067	234.99	263.379	228.414	267.158	249.662	178.955	264.16	210.151	226.627	287.236	247.668	287.129	256.215	238.558	253.324	197.62	241.488	222.509	233.179	258.311	269.701	289.547	207.806	255.574	294.099	175.577	275.93	266.086	278.422	276.982	243.753	221.985	263.068	221.732	281.637	220.244
ENSG00000165283_STOML2	60.2974	63.2341	65.7029	261.16	235.955	275.506	241.665	265.155	261.441	263.67	247.455	253.854	234.844	259.173	251.189	265.277	239.627	266.281	260.493	260.699	265.288	262.248	252.925	252.947	244.528	246.179	238.798	263.967	254.704	250.777	240.548	262.828	294.341	236.211	244.983	233.133	234.408	262.763	247.131	257.546	247.418	276.488	234.746	272.608	241.031	251.159	237.851
ENSG00000112118_MCM3	62.1562	62.9251	64.9439	244.712	264.216	247.475	257.617	240.94	242.375	256.138	251.68	253.315	240.643	251.066	251.266	265.429	266.298	256.648	251.311	249.868	248.559	260.082	249.594	249.642	249.031	268.399	243.963	235.045	271.174	251.721	263.732	253.802	248.989	272.231	253.283	254.601	263.214	251.203	243.944	255.28	245.929	258.856	258.197	248.823	263.942	236.928	272.531
ENSG00000167986_DDB1	59.2678	63.2114	65.5513	253.015	236.637	267.873	226.314	251.777	238.374	261.926	268.601	276.667	239.66	234.681	244.5	287.282	218.638	260.344	255.977	257.077	259.454	276.218	254.451	255.204	275.782	248.954	209.176	254.967	210.706	250.485	222.446	269.908	262.449	231.326	255.524	248.952	205.992	249.17	252.677	270.793	250.273	282.383	223.387	261.425	249.222	262.298	228.231
ENSG00000198258_UBL5	56.6809	62.4343	66.565	243.316	219.057	222.771	249.472	348.187	265.996	270.592	259.996	256.387	248.61	259.579	269.981	226.564	266.348	250.002	248.055	262.762	296.978	244.742	230.621	299.528	259.547	244.601	291.743	270.758	222	293.265	266.86	218.254	259.361	277.919	220.105	241.457	216.196	201.784	242.677	219.832	208.082	227.204	259.236	224.32	254.179	237.446	258.677
ENSG00000104529_EEF1D	57.054	62.7882	68.9674	313.012	334.036	255.367	249.027	267.122	304.103	252.541	206.07	214.105	234.694	264.029	228.529	248.733	249.197	256.733	294.54	265.204	257.867	253.071	259.345	239.352	219.453	251.201	217.951	227.586	389.358	247.852	251.105	275.135	303.339	240.675	225.938	198.285	305.215	291.052	219.173	236.988	216.449	276.346	228.112	276.114	245.815	223.584	290.894
ENSG00000178464_RPL10P16	58.7657	63.18	68.0831	267.426	239.345	252.823	273.718	320.424	277.445	257.315	261.962	239.8	284.686	240.685	254.834	140.988	288.635	209.616	249.245	254.23	221.805	238.169	256.252	233.037	322.452	252.617	338.391	305.658	265.556	237.273	230.061	254.634	213.954	216.967	302.029	294.104	268.175	249.601	306.571	237.004	234.416	194.853	216.051	232.691	241.021	258.124	240.115
ENSG00000116459_ATP5PB	56.7547	62.5084	67.2177	225.604	173.216	256.646	216.397	237.32	220.357	259.009	259.964	247.437	292.978	226.376	266.456	260.322	243.203	245.523	246.27	307.547	343.363	250.134	221.53	308.037	277.5	303.491	225.057	287.294	204.732	317.716	249.933	218.133	260.393	228.948	239.099	269.676	225.858	246.235	260.198	236.65	288.114	279.819	214.828	265.908	249.915	250.985	265.027
ENSG00000065150_IPO5	58.4428	62.467	67.7896	241.543	222.695	257.163	236.727	207.64	196.019	256.788	313.609	291.059	275.582	216.59	295.967	269.176	245.712	260.789	227.629	254.36	229.578	234.972	268.682	227.76	280.278	237.068	232.967	270.698	228.84	233.371	244.716	253.725	226.236	250.095	289.159	300.184	245.024	244.597	289.512	301.029	290.407	263.752	244.253	267.887	248.614	271.312	249.641
ENSG00000077312_SNRPA	59.0766	62.1896	64.0287	268.922	252.128	248.166	248.832	255.952	243.411	268.895	216.858	257.85	235.817	274.572	245.079	252.329	226.854	253.975	261.742	259.024	248.685	255.782	241.881	269.877	237.774	252.013	235.181	256.169	212.04	243.21	221.253	255.193	259.78	223.696	253.783	229.954	232.04	252.116	239.786	257.916	245.854	253.148	225.962	267.321	242.067	245.003	225.623
ENSG00000213442_RPL18AP3	59.8734	62.0472	64.8292	247.221	255.156	249.425	249.263	315.612	264.227	241.467	253.066	239.436	251.192	247.196	242.86	195.634	299.08	218.848	244.58	248.169	229.484	244.45	228.518	235.471	254.636	263.252	289.212	260.282	298.306	239.668	260.294	252.115	271.902	244.696	249.269	254.287	282.893	235.997	265.616	230.25	232.42	244.842	232.353	244.093	234.65	248.209	256.423
ENSG00000163902_RPN1	60.1802	62.0581	63.7071	246.661	254.826	255.982	261.643	227.651	228.049	256.538	248.48	241.565	235.476	225.579	250.478	254.367	242.916	252.671	234.679	248.265	249.524	240.569	255.181	242.677	237.609	244.365	246.416	242.565	253.985	241.176	263.469	248.2	255.872	262.64	240.153	243.729	257.785	250.495	249.277	242.595	237.723	257.145	261.469	254.829	238.245	232.928	248.779
ENSG00000213553_RPLP0P6	55.1186	62.3866	65.4527	251.603	226.539	251.405	262.011	270.966	261.209	254.339	257.293	246.466	297.416	223.172	258.237	171.09	265.306	212.882	226.376	252.027	207.872	216.246	253.209	217.628	306.234	221.242	317.599	300.784	244.968	201.584	235.05	260.449	226.759	207.657	305.041	285.375	249.591	250.482	294.254	227.393	249.502	208.772	214.57	220.218	214.71	266.097	222.577
ENSG00000129559_NEDD8	57.8595	61.8857	64.7588	261.684	240.696	231.724	228.839	265.652	258.356	251.988	231.766	211.051	242.016	248.424	229.744	226.742	247.89	248.26	246.036	241.817	257.21	291.397	247.195	268.094	231.343	264.659	246.736	233.11	245.234	264.457	253.036	244.77	262.339	275.796	223.729	207.906	248.034	248.763	222.503	218.469	211.497	250.226	275.438	259.262	257.295	202.401	262.496
ENSG00000164919_COX6C	57.9339	61.7564	64.2747	236.304	230.655	233.506	257.726	254.675	246.538	230.311	264.743	211.627	296.977	252.207	254.465	228.353	281.99	259.007	239.128	274.038	255.153	228.545	225.269	241.497	247.777	249.285	268.315	246.668	232.897	251.819	274.077	238.948	261.815	266.961	233.23	248.086	257.911	223.845	230.745	240.219	233.147	219.735	252.018	231.348	247.384	219.913	255.216
ENSG00000178057_NDUFAF3	59.3925	61.6087	64.0928	231.208	241.776	236.576	244.507	286.183	259.354	228.961	201.374	252.552	247.813	245.849	245.699	243.104	249.462	255.988	258.241	224.497	260.349	259.544	241.754	284.55	255.946	249.839	229.392	240.128	264.672	262.14	240.838	237.455	264.345	244.964	248.464	217.449	248.497	226.407	241.224	252.009	237.916	263.725	247.021	256.499	254.685	233.07	234.543
ENSG00000229638_RPL4P4	53.9508	61.7657	66.3084	263.482	232.903	265.079	253.34	240.125	253.357	262.895	269.225	252.53	299.745	203.091	245.976	165.144	265.285	199.822	214.794	258.93	199.519	212.233	262.472	199.826	298.702	223.114	324.875	310.516	243.018	196.549	227.967	256.796	218.832	211.732	290.097	276.302	270.986	248.149	292.635	228.025	255.422	191.545	222.253	219.818	205.074	274.19	231.4
ENSG00000125991_ERGIC3	59.4028	62.0371	64.2531	260.876	256.381	254.489	274.177	257.185	254.265	234.851	246.564	238.438	247.624	234.244	252.387	266.255	250.558	270.485	234.566	281.296	237.336	266.596	246.322	241.708	249.881	256.495	227.633	230.622	255.497	248.673	235.057	272.9	290.854	240.053	229.615	235.481	255.382	251.06	269.509	239.685	235.395	243.325	232.805	295.061	242.956	241.64	240.106
ENSG00000110651_CD81	57.6921	61.6097	66.1379	244.099	254.915	265.066	236.195	279.732	243.138	265.077	203.086	237.557	219.155	256.691	220.475	244.534	217.921	267.66	267.345	240.992	263.007	266.116	251.608	271.669	234.588	248.125	243.058	248.221	251.006	265.639	227.034	249.533	288.57	232.491	243.138	211.975	206.786	254.334	247.783	245.862	247.016	282.531	213.748	276.534	230.194	221.667	223.427
ENSG00000167747_C19orf48	58.9884	61.4676	64.8153	240.487	295.828	223.821	262.581	247.986	271.036	248.521	191.352	247.18	221.647	270.308	240.146	243.425	243.832	228.918	279.217	240.915	251.471	259.765	239.4	265.015	242.155	249.208	227.774	248.101	294.883	251.829	236.122	250.391	274.286	236.23	225.312	211.53	244.561	223.275	227.051	257.78	247.874	255.836	235.897	259.755	260.227	206.496	240.071
ENSG00000140740_UQCRC2	59.0531	61.4783	64.4428	249.501	234.206	252.176	236.911	220.493	199.667	252.526	271.009	259.433	257.891	223.532	268.902	256.813	253.919	234.153	223.172	243.325	230.656	240.603	239.374	235.979	257.412	244.848	252.791	264.892	227.822	245.259	246.568	233.528	233.806	258.514	253.538	274.696	243.238	250.756	259.931	268.917	273.741	248.131	242.584	242.308	238.83	263.379	238.356
ENSG00000065518_NDUFB4	57.4079	61.3075	64.8268	255.312	231.537	243.542	242.618	258.617	204.303	248.618	223.736	250.491	257.407	259.537	237.336	217.129	292.671	225.623	227.602	238.112	246.918	240.068	259.871	242.867	211.073	237.791	277.832	270.87	274.551	232.714	271.825	214.232	250.783	270.468	255.755	230.342	291.241	219.689	229.531	229.934	270.17	229.007	261.21	220.782	254.87	249.469	250.376
ENSG00000164611_PTTG1	55.9912	60.9782	63.4302	269.714	183.939	249.856	194.544	225.822	214.483	263.453	271.382	236.971	272.846	241.136	244.869	234.298	216.782	262.292	217.5	241.241	253.958	250.547	253.008	286.077	238.267	225.264	220.688	248.72	189.004	285.988	230.088	254.876	277.324	248.146	223.531	292.99	215.314	245.698	237.153	232.469	252.715	246.717	218.456	242.956	246.003	251.618	197.21
ENSG00000152795_HNRNPDL	56.6607	61.1786	64.2066	229.719	220.419	254.837	215.788	225.606	212.164	265.095	306.273	255.083	257.193	229.34	255.727	258.566	206.289	261.981	222.61	245.388	230.902	221.419	257.913	235.742	265.166	250.44	251.407	259.714	202.214	250.522	249.557	226.485	227.116	230.315	249.98	263.241	221.699	264.704	245.638	241.856	273.55	244.041	227.643	234.337	252.563	241.285	221.729
ENSG00000214736_TOMM6	45.5311	61.3543	68.0273	277.067	180.661	275.338	245.479	283.374	279.421	111.623	263.986	245.356	270.878	175.595	255.317	223.095	249.523	173.535	92.113	230.295	186.516	180.447	244.643	232.509	274.696	240.192	258.14	315.358	155.771	244.56	163.554	161.435	306.891	267.599	275.666	257.301	137.941	211.625	275.71	247.08	272.519	296.721	263.604	174.487	228.971	257.577	205.492
ENSG00000218175_-	56.7159	60.8645	65.2022	243.721	256.553	240.88	264.713	289.678	277.202	237.213	256.936	243.195	282.199	259.528	234.252	161.394	268.591	191.564	249.555	250.692	220.087	233.283	231.207	203.84	288.57	232.311	311.446	274.571	245.25	236.906	218.249	261.236	255.96	233.017	273.37	257.471	290.002	234.053	240.781	195.566	216.369	210.589	225.416	210.961	224.281	253.594	253.756
ENSG00000143321_HDGF	57.1958	60.7956	63.1177	275.492	268.533	246.796	196.515	252.928	263.451	251.098	247.258	224.894	233.714	245.517	223.76	248.179	227.345	260.575	240.969	242.969	249.176	238.065	246.203	232.43	221.342	243.396	215.838	233.491	278.583	243.681	243.575	269.901	261.117	231.291	215.646	227.563	227.981	268.305	217.764	237.753	226.49	256.815	231.189	262.242	232.057	232.547	247.089
ENSG00000143977_SNRPG	57.803	60.4059	64.6141	236.123	231.538	245.338	227.485	269.858	234.166	237.03	257.993	230.803	251.136	239.87	230.327	226.522	259.141	227.341	230.148	228.402	258.568	259.946	224.851	237.494	240.605	278.421	268.449	260.277	213.422	258.866	266.713	255.993	269.379	269.416	229.086	252.393	231.103	243.517	234.68	239.155	240.207	237.638	254.192	242.642	258.123	242.96	254.266
ENSG00000174886_NDUFA11	55.6216	60.5827	64.6744	260.144	225.366	246.816	223.953	253.169	266.314	280.858	220.328	212.489	245.967	252.734	225.828	262.517	235.487	250.52	270.314	232.647	277.29	253.504	221.521	285.701	245.735	200.759	262.731	222.367	254.359	269.9	248.238	241.461	288.58	230.076	195.376	206.834	210.67	267.505	216.846	234.538	224.786	243.201	221.722	251.441	222.846	194.864	232.619
ENSG00000136628_EPRS1	56.791	60.7902	63.5568	238.172	211.403	243.946	218.901	198.299	193.206	242.375	293.574	250.896	257.903	205.971	247.546	253.915	260.059	253.349	212.124	245.052	200.35	222.96	253.777	217.666	254.937	230.867	242.007	244.104	233.885	226.59	236.942	230.93	219.908	239.149	247.194	300.314	255.344	239.67	254.331	260.966	257.623	255.25	228.887	233.777	249.386	252.826	255.342
ENSG00000134825_TMEM258	55.8551	60.2085	66.4929	242.244	267.714	233.895	285.378	229.293	200.796	218.955	219.165	235.506	275.51	244.219	295.064	199.238	271.219	259.105	215.803	223.859	213.491	224.868	210.75	266.313	272.458	233.394	279.356	231.542	269.196	227.589	276.848	191.681	223.274	239.424	264.948	206.173	264.148	244.456	242.645	245.874	273.705	227.111	249.505	256.323	214.848	230.354	252.788
ENSG00000084234_APLP2	58.8257	60.4329	62.3113	248.692	250.239	240.398	254.671	229.679	219.081	243.319	250.453	239.706	234.684	234.716	238.399	264.053	239.911	250.677	236.137	238.151	233.142	241.683	247.548	238.286	232.114	253.931	229.297	224.012	252.052	245.669	242.26	251.36	244.439	242.273	235.025	241.78	249.262	239.272	233.026	241.037	243.792	257.453	237.113	251.413	249.194	227.8	243.64
ENSG00000229119_-	56.6635	60.7424	65.4998	268.814	227.169	247.123	250.997	273.403	262.667	246.62	251.607	243.361	303.459	235.778	256.968	182.207	250.885	206.096	226.483	272.231	229.956	197.342	253.103	223.832	290.942	232.92	271.975	284.042	230.158	219.312	238.5	258.138	237.215	216.041	303.036	266.283	245.953	242.578	286.658	219.258	259.997	216.905	234.083	211.729	202.08	240.821	233.227
ENSG00000184076_UQCR10	58.477	60.2794	63.4741	265.684	223.363	239.322	227.47	268.276	247.294	235.178	236.02	232.621	253.6	234.535	239.247	244.335	264.21	233.695	243.48	237.291	265.322	254.013	233.214	254.344	213.528	229.725	250.89	253.995	240.222	248.983	261.077	222.571	261.924	258.854	229.786	241.31	240.426	241.59	227.274	234.52	250.695	233.704	264.278	240.925	238.533	244.652	241.828
ENSG00000105220_GPI	55.1708	60.1256	62.2573	247.738	222.521	237.425	234.546	243.055	226.33	252.359	216.45	239.461	220.07	248.342	243.669	252.266	213.49	254.642	233.87	249.085	246.215	230.827	239.151	248.863	245.95	242.356	216.647	245.933	205.602	246.363	217.613	258.827	254.494	229.599	252.969	216.365	217.282	223.861	251.368	250.183	241.543	255.82	218.602	260.923	237.467	219.846	203.04
ENSG00000204469_PRRC2A	56.1995	60.0459	67.3167	220.262	295.578	222.263	259.186	281.122	279.317	243.529	198.476	244.991	218.62	270.285	238.902	266.213	217.7	253.357	279.376	229.325	279.206	273.419	236.637	286.752	231.129	279.617	222.902	218.371	249.438	275.695	226.97	264.012	241.465	237.789	234.734	213.813	219.284	232.401	238.223	243.245	231.442	264.578	233.728	270.943	261.258	224.074	218.681
ENSG00000179222_MAGED1	56.2657	59.8771	63.5834	214.18	261.451	218.254	290.911	275.34	230.166	208.208	202.6	232.243	219.684	242.145	237.707	251.028	253.279	245.218	260.857	243.276	250.815	271.167	240.262	291.385	221.567	245.157	239.613	228.144	229.722	254.685	254.69	206.384	236.098	300.795	238.936	232.068	231.643	209.226	224.036	240.475	239.403	246.161	255.3	233.34	268.776	202.805	222.861
ENSG00000138668_HNRNPD	57.7989	60.3008	64.5792	263.492	202.461	275.293	189.044	253.889	235.949	268.315	297.338	235.985	242.07	233.174	244.043	248.648	224.732	263.625	235.94	247	238.465	237.582	247.095	238.059	236.057	259.793	202.997	262.992	197.38	264.272	225.225	269.508	247.103	230	244.068	290.379	208.406	253.489	225.767	239.446	235.791	249.011	230.536	248.802	262.372	229.553	240.336
ENSG00000197747_S100A10	57.227	59.6209	63.6637	255.788	234.117	251.254	258.072	228.472	210.015	263.283	230.217	226.29	268.609	236.499	244.313	232.73	274.075	214.122	211.392	249.282	241.545	228.086	224.731	236.315	231.714	245.424	273.91	235.365	246.607	247.258	263.205	219.854	237.495	285.937	240.109	244.518	264.087	233.766	237.196	218.181	246.358	231.627	280.164	208.707	215.253	239.473	258.608
ENSG00000140319_SRP14	57.6093	59.5657	64.8836	239.022	218.928	245.101	233.693	308.367	269.017	236.322	218.414	230.344	240.154	286.267	279.714	236.854	277.683	225.94	232.156	227.825	240.574	232.653	223.364	254.216	232.948	257.548	274.913	237.504	236.529	249.923	280.583	227.915	241.741	271.712	233.783	216.96	260.196	249.269	223.487	246.039	230.715	234.567	257.015	218.384	287.441	220.485	262.461
ENSG00000267541_MTCO2P2	55.2699	60.2283	68.3932	230.114	218.843	225.181	225.176	276.987	348.45	242.366	261.383	225.926	296.898	251.99	236.161	146.345	266.156	199.886	236.908	219.67	239.238	239.46	268.888	219.714	358.71	249.136	349.811	257.435	280.238	216.421	225.97	274.208	237.319	199.587	298.661	271.666	277.54	271.364	296.068	195.549	205.308	203.874	256.929	211.094	261.929	326.496	231.724
ENSG00000135404_CD63	53.821	58.243	63.2274	251.756	265.012	230.932	215.05	276.228	245.941	212.565	216.63	206.504	192.295	243.284	196.824	216.275	258.997	235.653	235.012	225.783	261.953	256.252	229.959	241.978	215.986	262.475	223.763	214.817	270.809	250.285	244.993	250.1	252.773	256.995	194.686	205.515	264.328	225.155	200.02	221.154	191.553	220.844	251.652	227.456	252.955	205.718	277.306
ENSG00000230979_-	55.2145	60.0535	65.7648	271.921	236.957	249.915	255.153	292.857	269.149	247.337	254.117	233.691	273.863	236.3	231.044	149.583	263.293	180.727	233.486	244.265	209.968	223.631	271.131	212.579	285.37	209.999	325.215	283.127	244.698	217.601	219.934	249.586	239.516	199.407	268.764	263.031	262.039	240.912	260.542	199.014	228.381	184.732	237.37	232.374	227.08	263.069	213.788
ENSG00000137970_RPL7P9	54.6453	59.5804	63.6713	238.833	199.524	243.625	241.046	229.324	222.872	240.658	259.506	230.497	283.866	202.932	234.77	193.88	297.872	193.52	211.041	240.712	191.232	205.187	254.899	196.283	254.043	237.81	294.668	273.688	247.89	232.463	239.794	237.12	219.486	241.995	279.411	299.428	297.699	229.666	257.54	218.28	227.231	202.225	247.32	198.323	241.499	219.729	263.272
ENSG00000134291_TMEM106C	55.8284	59.4756	62.6295	216.175	256.635	231.407	265.553	215.138	212.433	237.139	246.232	240.535	231.223	223.048	265.505	231.921	254.894	237.812	218.936	225.45	226.315	214.933	237.993	232.448	218.892	218.908	252.037	224.375	250.784	224.11	258.016	221.075	241.551	291.222	244.354	249.544	252.956	235.806	245.966	244.425	218.627	244.905	278.579	254.217	220.64	249.719	245.303
ENSG00000130066_SAT1	50.0928	58.4897	75.9405	172.141	325.395	198.955	389.068	252.493	249.879	203.147	185.761	247.531	258.635	232.521	306.524	204.9	317.939	183.639	220.923	205.304	295.477	239.535	192.964	217.971	209.919	268.352	333.699	185.667	324.835	221.706	366.295	199.676	202.456	397.373	262.43	222.936	316.459	165.611	252.868	235.397	246.577	172.332	364.622	169.166	198.008	209.359	318.277
ENSG00000154277_UCHL1	55.1797	59.2999	67.1657	222.134	209.03	228.119	210.343	302.695	302.225	220.247	272.565	238.456	235.941	268.689	218.839	249.398	256.321	274.585	244.005	202.055	296.48	289.271	228.081	234.822	229.858	272.67	207.366	188.517	268.586	279.919	263.208	247.173	233.743	206.401	210.325	233.096	246.299	251.018	231.258	241.34	210.617	230.126	214.46	276.702	269.097	257.855	235.943
ENSG00000110717_NDUFS8	56.4172	59.0856	62.4533	237.334	257.459	229.403	248.166	270.357	277.668	243.305	194.112	215.555	219.193	249.885	225.901	232.84	233.937	249.599	242.012	252.551	257.332	252.12	239.315	236.724	211.131	230.863	225.591	212.386	259.37	241.34	238.828	245.217	292.188	226.112	207.363	187.155	233.358	264.225	212.139	219.743	198.177	235.96	246.632	282.476	226.862	230.75	235.772
ENSG00000185624_P4HB	53.9358	59.1877	62.544	247.601	308.886	237.009	234.47	235.76	208.376	244.509	202.733	206.28	216.467	241.254	215.502	249.17	241.546	236.493	243.524	238.152	250.512	229.999	234.32	221.275	210.641	231.138	241.604	207.012	287.318	262.383	258.645	231.818	255.685	278.116	221.736	204.13	257.758	246.989	202.32	203.43	213.75	234.815	250.946	268.471	243.856	185.691	250.917
ENSG00000182481_KPNA2	54.0455	58.8798	61.7799	224.429	198.375	217.826	186.444	245.591	235.678	225.827	265.64	231.751	235.071	244.911	239.653	237.752	202.522	233.352	242.504	210.757	259.667	232.409	300.279	264.98	239.856	232.835	191.716	236.64	192.625	258.693	210.48	235.36	247.629	202.958	238.56	264.714	190.768	229.339	238	241.194	252.015	266.103	215.634	230.569	262.225	257.315	200.622
ENSG00000147162_OGT	52.5615	60.7332	65.4299	230.407	244.839	242.473	240.311	197.102	173.122	261.771	264.994	279.536	244.509	218.124	253.777	273.688	177.209	257.082	217.259	252.655	190.857	218.809	275.252	217.828	270.817	210.225	208.931	244.474	188.226	210.31	196.914	246.427	199.595	205.623	275.737	266.586	193.99	252.119	270.404	280.676	267.489	261.564	224.065	243.393	230.429	252.042	224.11
ENSG00000101444_AHCY	57.1143	58.701	60.679	233.078	249.49	240.743	250.784	222.685	222.853	237.406	206.557	233.782	232.805	222.446	234.726	249.995	242.994	241.195	240.8	223.65	228.964	241	235.674	229.805	211.225	233.312	229.337	213.072	259.143	227.537	239.908	249.919	254.626	249.283	228.376	222.861	243.721	235.178	229.326	234.882	228.702	241.185	241.882	252.799	232.203	219.149	243.002
ENSG00000132475_H3-3B	51.1848	57.246	64.6779	187.708	399.834	193.219	249.246	260.511	234.126	185.909	217.678	207.196	202.425	262.306	225.114	233.552	262.874	211.257	240.168	198.662	232.854	280.942	203.854	255.021	191.139	250.426	236.316	208.942	263.48	260.474	255.177	222.054	221.563	274.529	204.315	201.359	259.89	195.835	215.96	207.503	206.355	206.012	247.43	239.997	273.753	195.689	279.243
ENSG00000255717_SNHG1	52.5122	57.6263	63.7722	219.192	237.118	223.021	279.718	231.069	200.947	220.435	208.696	243.092	245.996	255.896	269.636	236.434	181.853	202.745	218.653	211.444	245.069	245.494	217.681	261.906	228.249	271.487	271.894	242.692	198.612	268.862	181.087	209.584	205.022	229.942	237.335	229.618	218.538	201.145	252.668	258.846	262.947	220.227	260.978	203.954	245.298	257.126	199.146
ENSG00000100814_CCNB1IP1	55.3634	58.391	64.0043	233.016	234.112	228.037	263.879	184.55	193.744	227.438	244.515	258.122	263.398	210.345	258.13	232.404	274.501	227.236	216.768	228.577	200.956	198.707	225.584	195.532	260.2	206.803	248.885	229.531	271.653	195.436	254.376	229.035	235.014	253.448	248.346	262.222	256.564	221.386	254.213	250.611	268.475	218.649	247.336	222.004	221.657	237.499	262.861
ENSG00000230897_RPS18P12	51.7275	58.3436	65.5226	271.132	227.906	270.155	235.311	243.844	243.185	276.577	222.718	242.676	299.774	193.647	264.876	146.651	240.907	188.072	196.443	253.733	185.315	198.271	252.197	207.964	294.759	205.08	354.667	294.625	210.634	197.534	216.195	239.582	210.889	218.884	287.859	247.171	245.669	275.483	284.979	218.389	231.438	204.302	215.768	206.559	205.747	250.668	220.79
ENSG00000169567_HINT1	51.7135	57.904	62.6257	177.426	276.48	233.766	225.207	198.533	200.544	226.734	280.362	203.729	243.716	251.997	215.354	223.299	311.187	223.306	266.442	275.422	199.414	209.341	244.567	203.098	234.897	239.239	242.82	256.74	211.919	256.216	242.845	246.122	245.271	228.968	270.359	226.441	229.466	237.042	251.963	203.431	267.997	200.125	167.021	239.043	217.711	199.736	206.025
ENSG00000103363_ELOB	55.562	58.316	62.2043	228.943	223.819	228.077	225.749	267.012	266.964	221.412	174.142	208.54	186.693	253.039	230.359	232.337	260.035	242.291	232.849	246.511	244.196	251.479	240.417	246.587	221.724	234.559	283.171	226.111	254.642	233.057	264.87	246.961	278.693	249.436	223.845	189.914	233.471	231.859	194.603	209.858	202.498	244.281	215.563	252.15	234.307	216.91	241.238
ENSG00000168066_SF1	53.6688	58.0547	62.1528	202.102	239.534	203.922	210.56	240.989	248.187	240.252	212.905	233.754	199.461	257.361	208.048	246.358	219.106	241.946	252.96	230.53	227.078	249.812	233.069	261.967	223.548	248.752	231.368	219.061	227.174	246.295	217.681	255.868	257.84	191.206	223.767	219.545	190.79	253.752	235.687	257.302	216.12	244.708	208.444	259.603	263.745	205.411	214.194
ENSG00000126432_PRDX5	51.4235	57.9394	62.5527	233.128	288.204	228.666	224.249	244.056	274.128	232.329	183.146	184.105	213.433	261.842	201.898	217.939	242.626	235.913	261.393	231.414	240.523	227.56	218.811	215.13	188.388	245.216	232.323	191.622	331.541	232.101	251.103	263.283	264.425	209.756	176.578	202.193	250.723	248.675	204.34	194.87	195.256	236.997	226.442	258.799	225.425	180.411	271.411
ENSG00000137409_MTCH1	52.9498	56.8756	61.3139	214.149	277.251	219.183	253.895	243.851	249.306	216.948	203.276	210.312	207.736	245.013	212.729	219.508	259.634	225.453	238.347	216.963	250.578	245.108	211.282	232.621	203.551	238.458	245.11	209.679	271.145	236.27	260.135	219.483	229.551	263.897	208.599	202.187	260.514	218.054	211.577	212.466	210.406	215.49	245.304	231.61	237.865	199.518	259.384
ENSG00000118705_RPN2	54.735	58.4778	60.5344	237.686	204.791	248.737	227.531	218.036	210.38	236.463	242.335	242.977	231.283	221.653	236.66	250.14	207.567	247.114	222.93	232.913	227.249	222.652	234.91	237.327	242.294	225.732	203.002	244.074	205.455	227.353	214.435	230.353	241.744	214.05	235.449	236.905	198.651	241.247	240.692	242.269	251.453	251.229	215.702	238.383	223.857	255.227	207.422
ENSG00000118816_CCNI	55.3109	58.5024	62.1964	215.004	248.078	213.315	240.741	217.344	208.792	221.848	256.534	253.433	254.123	238.654	257.64	249.021	239.107	235.24	219.567	226.866	217.458	225.011	225.464	231.4	250.623	219.194	217.668	241.066	242.088	223.03	231.388	237.124	228.996	242.422	259.59	259.308	230.705	215.4	267.353	273.834	264.615	242.349	221.042	232.78	217.745	245.9	225.628
ENSG00000141522_ARHGDIA	51.633	58.5873	63.34	253.968	271.107	238.821	206.992	227.578	286.408	257.339	187.467	199.902	207.5	249.087	208.005	241.287	198.511	251.3	267.77	253.398	245.469	245.511	244.085	254.585	195.911	241.194	193.316	229.877	250.238	241.181	197.455	265.91	276.759	204.484	207.311	178.792	214.275	253.248	211.896	206.998	203.029	259.726	206.379	274.088	220.604	202.937	223.343
ENSG00000175334_BANF1	54.3641	57.6556	62.4321	229.965	251.942	234.025	254.292	253.625	260.766	216.095	191.746	233.063	202.245	237.881	226.061	248.362	227.536	227.128	260.108	209.302	230.795	251.93	228.805	256.98	215.243	241.488	211.464	235.98	251.953	270.969	265.05	223.563	250.184	243.597	202.114	189	239.089	230.449	202.292	223.821	208.582	221.541	231.942	226.771	233.239	202.618	222.293
ENSG00000049449_RCN1	55.0297	57.8106	60.9354	222.798	243.648	236.477	249.779	197.208	215.651	230.983	257.049	216.801	231.024	220.012	222.925	239.628	259.052	241.799	220.439	231.598	208.458	231.461	238.17	217.252	211.411	231.535	240.49	210.779	265.413	220.801	258.18	226.308	231.736	261.156	214.671	256.154	267.644	233.625	218.334	225.436	230.772	229.503	252.16	222.957	243.773	217.595	278.811
ENSG00000099797_TECR	54.3644	57.8608	63.5234	232.706	223.184	221.643	206.835	260.453	260.286	230.508	206.913	227.45	209.433	237.675	228.637	262.441	202.548	232.378	263.747	235.224	269.888	256.23	233.572	249.049	228.3	217.328	209.826	226.955	237.923	222.936	235.635	245.177	255.775	213.376	222.126	194.721	202.347	261.589	213.523	233.797	246.05	257.925	215.863	282.485	220.476	261.522	217.846
ENSG00000232112_TMA7	52.8649	57.5099	63.4967	240.873	247.661	241.082	242.257	258.712	214.259	230.742	214.144	183.833	203.287	238.733	213.824	200.963	275.623	229.338	238.769	227.254	219.04	231.88	216.48	242.633	203.137	275.194	273.024	228.542	257.012	261.616	263.481	221.197	246.67	272.018	210.432	214.508	256.095	197.301	199.805	200.431	184.147	224.926	262.867	210.672	269.202	190.821	242.806
ENSG00000204387_SNHG32	54.9128	57.7488	61.8016	211.973	293.5	230.418	281.809	221.899	218.716	219.352	204.237	242.036	231.573	238.744	232.114	224.143	266.293	212.976	225.127	238.187	218.222	226.464	223.802	203.604	208.679	244.741	248.028	197.612	332.663	220.549	259.77	228.613	249.131	250.943	221.935	223.433	286.417	240.861	243.04	232.781	237.018	206.303	251.426	239.113	224.62	216.91	283.772
ENSG00000107223_EDF1	47.0835	57.654	62.9941	233.283	288.776	237.989	212.516	227.627	270.102	240.011	183.556	167.968	187.728	255.796	185.382	203.118	231.328	220.01	262.084	224.414	226.86	233.124	252.392	220.288	187.788	246.697	250.731	189.972	312.677	246.908	231.763	238.166	277.177	192.487	182.177	185.258	255.961	259.733	172.335	184.302	180.138	229.903	212.253	256.606	239.993	178.276	268.862
ENSG00000126247_CAPNS1	53.9975	57.4058	60.3993	245.14	223.156	247.409	250.66	207.133	233.7	245.434	209.397	238.251	229.114	215.912	224.335	242.237	211.009	254.051	222.475	233.769	235.429	225.458	225.894	237.835	243.12	259.812	207.019	231.519	214.895	228.044	212.263	233.442	252.069	216.225	222.646	207.604	194.085	237.789	223.181	230.181	267.247	230.133	213.266	247.5	222.021	239.679	197.338
ENSG00000146223_RPL7L1	56.1676	57.579	60.1629	225.872	218.397	226.902	208.924	253.447	226.462	226.966	258.714	231.544	238.312	220.367	227.519	250.714	239.838	234.903	226.787	221.588	226.26	215.996	224.497	214.474	240.923	222.628	238.331	222.47	225.19	220.58	242.34	235.289	239.701	237.369	223.39	249.811	229.159	229.353	226.57	236.737	231.279	233.719	245.006	252.416	244.161	243.009	254.581
ENSG00000129562_DAD1	53.6352	57.2299	59.3366	224.85	202.714	211.33	232.066	245.259	228.334	213.614	246.056	237.056	249.386	233.52	256.581	223.483	234.363	229.254	242.163	210.887	237.987	230.596	211.201	251.036	216.266	220.795	221.337	238.54	225.421	240.579	228.586	211.733	215.707	230.369	235.64	228.134	206.871	214.152	230.018	256.599	237.443	211.871	236.337	198.848	199.866	218.615	233.658
ENSG00000126016_AMOT	44.6844	57.3892	62.6673	275.433	167.81	270.13	171.455	209.86	174.851	265.13	259.759	227.039	202.87	205.76	223.748	252.22	156.805	238.286	213.829	249.922	218.146	229.856	250.918	257.802	260.976	234.741	167.676	288.587	142.427	252.428	158.61	225.834	190.398	162.113	229.647	240.756	161.45	229.467	231.249	238.884	245.566	268.809	166.831	222.425	247.565	231.75	153.347
ENSG00000233762_RPS15P4	53.1171	57.7006	64.8658	254.777	233.653	234.833	243.871	278.973	305.947	291.31	221.367	215.169	262.332	211.212	221.135	145.475	259.001	198.942	225.393	259.618	222.702	199.644	248.863	217.944	248.457	214.557	295.939	262.694	282.335	210.364	229.222	263.719	227.378	180.69	264.77	227.709	246.521	278.297	258.707	204.724	186.645	174.501	216.225	241.687	211.773	232.383	210.939
ENSG00000122565_CBX3	55.0394	56.8499	59.7107	238.345	210.831	234.758	215.101	228.437	212.462	213.383	279.281	226.001	230.835	241.096	234.734	220.481	226.31	227.505	213.066	220.05	227.295	222.126	222.793	230.117	218.793	238.939	215.942	251.168	206.264	244.345	244.726	223.775	210.541	240.721	217.812	264.431	225.454	220.665	231.834	231.57	239.787	223.672	250.825	224.234	238.555	233.821	242.066
ENSG00000130707_ASS1	52.6158	57.2944	59.6108	227.852	229.565	236.899	224.08	169.073	224.034	234.653	229.783	229.442	227.419	209.948	222.613	257.949	224.617	236.42	238.682	242.328	189.316	229.195	262.332	183.71	217.496	192.009	207.269	216.87	257.254	182.861	188.529	246.084	261.704	164.255	212.009	237.726	235.742	266.664	231.73	233.86	209.719	250.972	182.933	268.424	221.687	229.16	256.947
ENSG00000159131_GART	54.6372	57.6178	62.121	238.709	218.401	250.222	197.313	219.767	197.115	232.719	265.925	259.002	244.233	210.178	252.004	242.441	218.99	238.753	212.701	235.803	221.25	220.449	242.307	213.397	254.779	222.061	215.211	239.492	212.549	221.169	235.135	219.446	206.447	217.799	260.65	261.721	218.193	229.403	249.901	264.081	255.772	231.54	239.987	221.347	222.821	257.826	222.764
ENSG00000121774_KHDRBS1	55.5444	56.9736	58.9028	238.028	227.13	237.127	203.974	209.25	202.195	240.026	255.369	223.621	240.26	225.104	231.196	237.209	217.931	245.035	222.14	225.119	210.153	228.073	236.069	221.865	226.249	231.61	216.306	230.722	221.775	231.554	220.089	228.871	225.438	226.823	222.291	251.318	231.843	234.237	230.089	237.26	233.127	243.854	221.883	232.634	227.716	226.646	223.081
ENSG00000023734_STRAP	55.2288	57.0693	57.9915	230.809	199.894	228.877	201.332	221.845	199.789	220.663	256.01	240.713	243.99	217.297	247.016	230.664	226.285	236.382	210.262	225.405	228.582	227.972	233.448	221.672	241.476	228.92	224.496	223.524	200.281	228.959	225.815	212.489	223.731	231.72	229.065	250.255	219.534	210.435	231.111	238.864	240.517	230.542	231.484	219.7	232.048	224.567	223.664
ENSG00000197728_RPS26	53.4809	56.5588	59.8622	310.778	193.182	227.928	284.107	226.525	240.874	349.418	204.778	234.205	228.93	243.774	338.29	241.85	224.82	235.173	211.222	281.507	230.879	309.294	214.769	234.483	209.842	217.581	208.222	220.037	191.382	232.084	214.697	210.614	299.393	227.13	221.621	220.813	209.536	213.666	216.368	219.815	229.789	225.945	234.208	349.238	212.886	221.688	199.89
ENSG00000143420_ENSA	54.2657	56.7847	58.1277	240.536	217.745	224.581	196.728	235.797	237.159	232.317	232.331	220.031	230.394	237.689	211.989	232.444	209.52	226.999	224.968	231.94	231.178	232.533	218.93	227.278	211.764	232.742	212.395	216.847	217.709	241.915	221.868	224.383	237.131	201.099	215.443	219.304	229.646	250.008	210.759	213.629	209.897	229.409	227.572	235.846	229.649	226.541	233.477
ENSG00000264281_-	52.9971	56.5943	61.1942	227.986	223.126	233.536	261.726	232.512	245.346	221.465	241.611	237.705	243.069	214.062	251.65	176.964	260.983	179.777	211.915	212.207	190.981	195.823	208.976	209.826	238.256	215.452	264.096	250.649	264.002	205.333	240.898	242.624	215.24	212.457	255.633	276.963	249.467	240.033	235.78	224.768	215.519	200.296	222.796	192.571	216.233	260.54	211.574
ENSG00000125971_DYNLRB1	54.0771	56.5763	58.5117	225.784	224.818	233.31	232.758	217.801	215.811	225.302	210.495	227.25	215.486	219.773	219.316	249.909	229.776	247.126	230.794	214.711	231.771	227.931	241.338	228.508	201.946	213.167	243.073	226.368	228.71	234.975	231.531	211.354	243.513	236.833	226.242	179.292	221.772	234.293	206.069	212.573	226.166	222.645	238.181	234.31	205.297	241.537	223.028
ENSG00000106263_EIF3B	53.8373	56.4561	61.4035	223.132	215.169	219.492	191.109	249.879	280.635	225.58	232.219	216.372	215.889	255.677	217.142	245.065	205.198	245.878	236.517	228.243	254.872	244.714	267.286	230.921	208.287	251.05	209.971	210.002	214.538	259.038	205.582	245.797	242.44	233.761	216.508	219.421	204.691	247.67	217.207	226.068	211.118	232.268	218.816	252.551	230.463	225.113	205.473
ENSG00000178999_AURKB	53.927	56.955	60.5657	218.857	227.473	235.299	231.349	224.816	228.167	254.517	229.024	246.902	217.397	214.351	216.008	268.035	207.541	265.017	233.312	223.662	234.158	228.308	236.772	239.894	215.608	210.579	195.523	226.355	212.051	221.278	209.181	253.843	271.887	221.934	242.68	228.563	209.059	259.179	222.858	249.424	214.245	250.992	223.879	272.977	205.845	241.01	196.271
ENSG00000181524_RPL24P4	50.082	58.1985	63.456	252.998	207.539	253.639	234.261	235.082	262.617	274.966	231.327	238.332	318.703	203.849	253.024	159.31	235.474	182.699	216.503	256.036	194.245	194.686	236.009	196.482	297.368	212.944	282.457	271.794	216.62	189.556	186.764	253.885	192.933	197.421	299.055	252.957	199.618	247.572	257.355	212.892	247.736	187.736	216.334	218.857	208.502	269.782	202.457
ENSG00000089220_PEBP1	52.3344	55.9857	57.6581	242.377	217.298	232.172	194.316	240.968	223.14	224.746	199.661	196.487	216.817	229.317	208.588	236.496	237.972	230.274	205.967	227.066	226.609	229.454	226.078	230.752	198.982	232.879	211.585	222.534	213.593	238.94	216.456	228.12	234.548	229.272	203.524	198.226	217.177	227.056	200.773	204.083	212.195	232.885	216.17	224.746	235.516	200.604	215.034
ENSG00000189060_H1-0	46.1799	53.9386	63.4147	187.988	291.42	183.894	230.811	273.555	281.667	199.586	169.101	180.475	174.76	247.885	185.483	191.907	269.621	192.678	256.653	184.907	265.812	255.583	198.199	212.288	171.206	234.092	244.652	172.06	358.685	224.052	272.529	219.221	204.736	246.531	178.419	157.944	301.883	224.453	169.422	184.657	169.968	197.098	246.464	224.717	228.58	197.17	316.417
ENSG00000251562_MALAT1	49.1227	55.849	61.9916	185.012	263.914	193.551	380.772	198.302	233.378	204.61	195.887	244.893	248.101	174.647	250.885	221.658	286.832	177.6	235.885	239.926	200.635	230.028	204.059	203.208	234.354	222.142	341.404	191.657	201.252	223.179	268.183	206.578	178.616	335.255	259.924	247.563	296.154	126.068	243.92	235.384	216.245	184.251	293.324	145.335	223.613	186.74	233.541
ENSG00000177156_TALDO1	51.6698	55.8372	57.8644	234.249	197.943	225.591	199.391	230.345	241.71	223.375	230.811	224.867	200.303	236.575	203.536	223.8	203.058	228.304	231.84	223.322	245.665	247.182	213.065	237.383	206.193	231.465	206.233	227.476	212.433	229.125	211.715	222.634	248.218	200.91	206.719	221.566	192.09	230.251	206.666	214.344	207.428	235.016	200.485	246.187	231.435	211.707	211.186
ENSG00000146425_DYNLT1	51.3619	55.4353	57.4106	200.681	231.835	224.861	226.613	220.455	198.743	208.44	220.019	203.389	214.623	228.114	219.774	200.951	243.16	201.594	223.228	198.762	223.851	210.996	205.038	240.102	198.732	223.028	239.109	202.475	234.19	226.932	240.776	206.676	229.932	247.746	217.177	223.402	238.116	208.213	225.045	209.322	231.313	204.626	239.055	200.359	228.772	209.734	227.114
ENSG00000087365_SF3B2	52.8614	55.6475	57.5433	217.715	236.344	225.318	213.745	214.858	212.232	228.136	201.811	223.045	203.033	236.461	211.183	222.741	226.574	227.585	221.839	215.525	218.308	229.151	230.514	214.63	198.084	242.745	222.439	201.354	233.98	220.106	223.091	242.011	235.955	251.816	207.665	209.678	226.615	228.665	202.302	205.71	194.811	230.948	232.249	227.624	232.818	187.905	221.809
ENSG00000138071_ACTR2	52.0804	55.3585	58.6722	205.826	207.583	221.892	206.941	207.633	174.051	215.575	270.771	238.142	240.453	204.291	236.759	217.897	232.594	220.976	199.236	210.388	198.725	211.689	213.026	225.091	232.359	230.173	219.218	236.048	217.244	223.602	236.312	199.197	181.319	237.755	232.548	252.44	229.156	213.775	235.387	249.003	237.809	219.498	219.532	201.98	230.213	225.218	230.85
ENSG00000101057_MYBL2	53.4235	55.6123	59.488	225.866	237.284	226.68	214.585	223.147	238.028	246.609	207.99	220.934	210.92	233.548	208.124	256.582	213.462	249.975	239.492	221.751	235.432	236.139	237.724	219.365	221.043	223.24	217.246	195.353	244.776	220.823	218.27	249.019	261.409	214.389	202.067	199.494	229.187	244.738	213.211	216.485	205.785	257.243	204.059	260.88	220.618	210.39	226.995
ENSG00000262902_MTCO1P40	49.2575	55.794	66.374	248.026	201.077	270.863	236.492	266.357	288.655	274.057	233.371	244.251	311.514	218.434	222.302	148.207	191.914	179.957	223.825	253.799	188.951	213.414	254.105	219.369	324.861	209.345	306.481	316.795	191.104	198.842	189.329	252.066	199.359	148.78	318.106	255.54	222.527	262.914	285.431	205.911	233.611	196.426	221.392	195.776	182.957	281.84	188.101
ENSG00000143870_PDIA6	51.9526	54.7454	58.2663	210.392	244.493	206.522	240.126	219.183	201.182	205.028	210.942	210.41	224.663	232.213	218.78	222.928	243.195	216.551	206.377	205.357	230.69	225.097	223.308	226.867	203.254	236.861	232.246	206.759	238.517	243.923	237.148	210.25	229.724	256.739	206.997	215.129	247.036	199.186	213.276	218.003	206.755	217.42	233.338	212.453	231.655	190.346	240.281
ENSG00000010256_UQCRC1	52.5831	55.4306	57.5338	224.042	250.879	210.241	227.773	226.346	250.016	222.466	196.425	197.785	209.009	223.674	223.521	229.636	219.302	223.748	239.807	217.83	232.364	225.127	208.637	211.474	220.978	243.763	202.317	212.084	263.261	217.818	220.72	249.875	260.156	205.466	205.429	196.323	230.302	227.967	199.557	217.852	207.621	231.414	212.184	245.241	210.606	211.914	223.694
ENSG00000270647_TAF15	52.287	55.4051	61.401	222.018	268.162	215.986	184.435	214.658	215.345	200.433	258.199	254.226	219.736	208.82	195.397	210.134	186.562	232.597	239.633	187.89	194.957	198.544	220.019	213.827	246.281	227.444	222.065	223.838	228.049	204.327	197.857	237.399	274.502	221.222	257.48	220.94	220.584	229.376	243.575	260.425	229.804	247.052	193.994	258.646	250.644	219.641	264.129
ENSG00000100219_XBP1	52.612	55.0735	58.5784	208.977	255.205	219.096	239.624	210.004	205.922	214.236	192.257	213.543	208.801	225.291	214.512	220.844	232.304	239.471	219.581	224.851	203.902	196.792	253.559	199.31	202.047	216.436	233.544	180.383	238.807	217.476	249.555	212.502	229.835	237.512	207.844	224.561	236.241	211.78	232.414	219.744	212.342	234.57	225.67	239.084	222.76	227.351	249.516
ENSG00000226221_RPL26P19	49.6021	54.9481	60.2361	234.849	219.675	229.444	272.439	223.657	236.872	219.749	250.43	227.412	294.179	192.906	222.273	138.264	235.196	179.058	200.37	242.88	178.213	191.755	223.101	198.792	242.234	188.843	297.749	290.474	209.491	216.157	191.431	223.613	199.959	198.338	244.268	285.473	219.835	237.075	261.818	217.28	216.791	177.76	195.196	215.497	197.409	246.927	198.619
ENSG00000117118_SDHB	52.758	54.9232	56.2453	222.46	191.677	227.042	207.223	228.315	201.645	217.352	228.45	210.239	223.236	226.254	218.259	226.593	214.146	209.985	199.168	209.958	223.599	240.54	219.342	212.527	225.058	203.493	226.083	222.036	221.078	215.929	223.236	210.533	224.75	214.864	220.043	233.222	207.458	218.276	215.329	224.247	232.447	206.547	232.249	218.897	220.047	221.767	217.534
ENSG00000014641_MDH1	52.389	54.4494	58.6486	254.579	210.77	218.203	229.22	232.147	201.087	194.19	238.999	212.357	260.491	235.41	224.196	227.91	213.143	222.272	213.799	208.079	248.09	257.433	236.62	216.334	243.031	204.445	193.834	242.336	209.852	226.551	215.799	209.965	209.457	217.392	198.377	225.105	194.612	205.77	216.603	211.044	220.63	203.799	224.008	199.529	244.231	241.263	223.746
ENSG00000203879_GDI1	51.3599	54.4667	56.6115	212.764	247.538	206.661	258.237	226.406	231.664	233.303	182.964	205.361	199.839	240.38	214.541	219.313	220.116	205.674	220.687	219.438	236.235	226.235	200.292	226.459	204.28	223.036	216.504	204.882	228.893	235.747	223.492	218.365	222.166	237.679	200.54	182.571	214.399	208.994	191.333	199.661	209.355	215.04	227.82	223.046	213.263	190.347	217.368
ENSG00000057608_GDI2	52.4768	54.9475	57.0489	210.932	200.739	214.572	224.517	185.955	180.47	218.633	253.949	223.255	263.377	197.14	226.094	216.693	242.16	227.796	190.377	212.151	189.724	219.513	215.846	204.544	220.11	218.179	228.713	224.894	209.566	220.358	245.352	197.779	205.052	234.234	215.291	265.543	226.511	211.396	226.469	241.623	228.329	224.58	212.808	196.737	230.137	220.067	237.766
ENSG00000103202_NME4	45.8899	54.7186	58.7334	211.547	252.989	212.842	194.751	235.219	260.779	197.575	168.134	168.218	157.348	240.719	190.521	195.369	223.52	220.865	235.652	205.563	248.738	221.35	195.451	221.307	175.212	236.803	214.246	164.496	277.27	243.452	218.464	236.074	233.813	219.285	164.016	153.555	225.858	225.053	168.083	164.978	167.811	218.057	220.251	234.078	222.346	181.239	244.132
ENSG00000104419_NDRG1	46.8708	54.5502	59.9956	233.719	169.88	224.352	207.687	251.14	193.753	221.013	178.995	253.796	243.122	252.6	266.358	231.011	160.272	217.75	214.89	209.05	262.099	235.118	206.835	248.627	232.976	241.604	167.285	229.481	151.819	254.356	183.698	218.003	218.398	201.341	250.633	197.02	170.796	183.106	241.992	231.12	235.068	215.196	174.297	202.938	185.393	222.421	153.47
ENSG00000088832_FKBP1A	50.5768	54.327	56.9138	229.287	220.975	215.029	185.014	227.782	238.736	230.369	224.995	200.484	227.274	216.165	197.841	232.55	201.814	215.197	208.164	203.789	228.468	204.729	215.981	252.495	222.341	214.124	201.492	218.451	195.784	224.052	222.826	207.14	196.985	193.697	214.71	198.212	199.384	225.518	215.708	261.612	238.243	257.516	219.201	223.939	242.123	222.538	197.789
ENSG00000182979_MTA1	49.7115	53.776	57.6506	222.466	262.324	229.724	198.775	230.895	263.183	245.133	215.16	180.979	168.265	233.001	181.926	222.965	175.473	209.188	217.926	207.76	227.979	212.042	256.812	208.498	213.092	214.691	184.274	185.883	225.902	219.882	198.664	250.014	233.882	206.68	177.065	178.995	221.462	252.048	200.949	195.931	199.058	243.695	216.891	231.626	215.048	206.605	226.996
ENSG00000125166_GOT2	51.3644	54.0704	56.1928	210.818	212.723	204.153	208.429	206.74	215.702	223.387	242.752	225.798	208.361	204.489	218.63	236.531	195.343	224.024	227.764	214.414	226.886	219.899	222.515	202.955	227.114	197.852	195.708	216.438	205.03	210.474	209.903	225.02	219.318	203.121	216.125	223.269	203.6	222.262	219.5	240.365	230.892	218.804	205.007	225.493	200.89	233.34	208.905
ENSG00000169564_PCBP1	51.3205	53.9538	57.6401	226.383	208.845	216.734	178.944	237.611	228.993	224.617	203.258	218.731	205.952	236.74	208.001	241.119	187.076	228.785	229.767	216.984	249.364	227.92	218.398	232.859	205.755	230.825	190.746	212.927	207.902	236.392	205.125	227.788	242.857	200.288	210.48	197.734	194.332	240.64	202.781	212.568	213.241	236.687	200.885	235.738	214.896	213.959	200.46
ENSG00000125534_PPDPF	49.8633	54.1007	57.366	233.235	220.726	219.875	245.895	222.896	197.898	228.552	177.471	214.056	215.935	229.67	218.747	190.637	206.595	225.921	214.893	228.633	209.216	238.889	208.98	238.186	231.239	187.501	228.603	247.085	195.221	231.266	182.243	212.129	240.078	215.693	229.857	173.671	195.238	216.871	192.758	207.886	228.847	225.112	195.238	238.741	204.922	204.118	177.936
ENSG00000136238_RAC1	52.5429	53.9445	56.0785	206.581	217.607	208.721	216.854	203.948	212.952	214.934	239.663	224.317	222.464	221.751	224.943	240.186	202.909	226.957	204.678	215.667	213.514	215.385	212.45	216.514	215.889	196.715	190.214	209.691	214.883	211.61	207.135	218.103	236.907	212.537	218.208	227.928	210.432	227.197	221.59	231.727	222.125	224.304	213.751	230.108	210.085	240.44	207.263
ENSG00000244038_DDOST	52.4938	54.054	55.7778	227.491	202.815	209.155	219.145	209.416	203.765	220.48	207.588	220.027	211.502	211.236	229.714	236.779	213.645	219.323	216.331	221.577	219.913	209.118	213.299	229.022	221.627	213.351	208.513	223.606	214.161	229.833	209.555	224.326	232.604	217.953	214.851	208.275	206.628	220.2	217.922	214.72	229.273	224.619	216.101	240.482	215.131	212.207	202.935
ENSG00000116221_MRPL37	51.3819	53.7145	56.1157	226.077	196.95	222.014	202.498	199.877	203.936	229.63	211.194	227.413	217.336	210.302	232.602	236.825	202.296	225.385	211.146	224.981	215.649	212.879	218.062	214.065	216.318	211.428	197.737	220.394	210.805	213.281	201.784	212.394	232.92	214.359	211.949	215.357	196.655	221.861	222.733	222.909	229.339	234.42	193.821	234.261	201.467	221.377	199.149
ENSG00000142192_APP	51.4632	53.5466	56.1182	199.27	240.624	211.451	248.301	202.74	202.102	210.564	216.254	206.047	198.663	210.794	202.63	225.223	227.561	205.788	218.874	211.145	209.162	218.058	220.514	215.097	203.408	221.065	225.273	198.746	269.865	219.954	222.224	211.07	204.322	226.59	202.879	209.049	228.615	210.129	214.343	214.03	232.338	216.452	230.848	211.557	225.976	203.313	221.846
ENSG00000167397_VKORC1	51.2681	52.8439	55.9435	212.562	223.837	219.586	265.885	217.932	203.386	229.994	167.356	205.053	209.667	221.589	218.927	207.827	223.585	218.047	204.451	207.208	219.253	210.189	195.275	226.544	184.254	207.187	230.319	205.546	223.914	228.576	227.175	205.307	224.417	264.029	202.409	181.505	213.594	200.068	215.324	205.13	205.151	209.631	240.05	210.083	186.983	197.876	215.411
ENSG00000106628_POLD2	51.2898	53.557	56.8223	211.469	209.918	217.916	215.264	222.884	225.574	224.491	185.421	210.476	204.59	227.975	206.866	229.955	195.128	230.383	238.216	229.78	226.733	227.928	225.124	234.432	201.737	212.097	204.359	213.192	227.43	223.395	195.773	225.123	237.386	203.88	197.973	186.292	208.217	226.868	193.786	201.128	208.135	244.239	209.276	233.118	209.136	217.611	209.357
ENSG00000253729_PRKDC	48.8302	54.3496	59.2976	212.288	197.419	223.15	195.303	195.374	169.9	222.157	269.21	251.954	225.111	187.725	245.51	251.158	192.416	227.186	209.466	212.564	200.036	211.13	234.512	220.1	251.592	207.024	182.929	236.252	182.55	209.837	193.111	220.521	168.343	195.454	252.932	259.029	192.5	215.833	252.375	278.576	241.815	237.503	191.828	218.964	228.52	234.072	187.917
ENSG00000129084_PSMA1	50.5254	53.3429	55.1153	230.664	184.354	236.364	189.967	202.082	196.412	202.159	229.987	204.763	248.281	208.938	218.433	210.872	214.976	219.601	187.493	220.413	196.797	197.882	230.231	221.439	208.354	214.596	214.321	213.536	186.521	193.323	220.477	201.589	224.064	217.887	220.218	236.167	207.364	222.382	209.413	224.827	213.208	219.081	218.283	199.683	208.691	211.067	204.019
ENSG00000100591_AHSA1	49.8823	52.8088	54.4389	209.935	196.04	214.358	193.236	222.755	199.316	206.405	221.852	178.01	203.858	213.68	204.694	208.815	227.477	195.988	198.516	180.819	215.515	210.199	208.775	210.7	200.169	216.761	217.13	197.941	221.248	218.723	217.943	205.171	241.736	212.413	176.595	193.237	234.439	221.118	209.989	217.192	186.158	211.771	234.537	213.256	214.139	215.576	222.008
ENSG00000101182_PSMA7	48.3047	52.8904	55.8333	218.973	215.812	206.266	188.209	238.464	233.56	193.192	212.089	193.299	187.174	228.463	190.524	202.639	224.441	197.389	212.075	204.906	233.795	225.57	204.526	211.048	197.026	218.455	191.439	184.187	237.704	223.386	221.824	222.407	239.613	187.255	183.388	187.156	223.174	217.028	191.171	195.227	181.967	213.031	200.911	237.885	214.501	196.492	227.484
ENSG00000225972_MTND1P23	48.0493	53.5704	60.6892	223.517	162.677	207.216	218.167	266.747	281.412	227.681	183.446	225.219	266.325	210.129	200.063	169.06	165.664	193.373	221.254	246.427	205.626	233.938	213.182	232.313	265.297	232.784	248.349	286.362	183.465	198.971	163.497	245.608	201.907	133.78	279.47	234.203	191.218	226.9	246.782	200.827	215.381	192.004	173.788	192.775	201.63	269.291	163.73
ENSG00000101972_STAG2	48.6524	53.4312	57.2074	199.432	225.99	246.251	206.351	182.289	155.249	199.843	284.849	229.036	234.142	195.155	246.073	214.656	253.127	188.903	186.05	194.428	188.921	217.632	203.976	182.854	221.123	192.328	230.968	224.85	216.346	207.377	212.793	186.226	162.931	246.006	226.08	242.926	209.984	206.17	219.285	236.111	217.379	209.217	236.876	186.696	198.377	218.206	228.212
ENSG00000143418_CERS2	50.7488	52.8417	55.016	199.07	218.652	208.697	237.799	207.457	220.36	193.386	194.549	241.743	216.953	200.716	233.777	200.119	233.906	195.153	202.103	202.14	197.453	215.954	208.202	213.194	214.01	206.522	219.178	225.346	228.835	200.622	230.987	219.112	205.56	207.904	208.346	210.599	216.704	209.912	250.712	212.567	223.237	199.296	244.157	212.135	206.592	214.003	207.934
ENSG00000168906_MAT2A	50.9423	53.0999	55.6144	210.302	226.502	224.627	221.84	207.881	207.705	214.803	234.917	200.621	186.214	212.159	174.324	245.721	176.738	227.309	207.694	212.641	207.068	213.037	229.723	217.742	222.663	198.376	202.949	220.144	191.521	198.916	206.837	220.006	187.987	183.123	208.449	212.642	195.757	242.827	210.5	213.696	206.23	234.495	225.556	231.807	215.348	214.185	208.015
ENSG00000100804_PSMB5	49.9486	52.6593	55.6535	202.339	205.694	207.665	196.571	222.363	238.726	211.651	210.643	196.844	199.16	222.698	200.258	229.857	224.285	215.285	222.826	212.948	243.54	225.056	189.581	213.18	204.047	225.112	196.393	208.402	235.851	202.07	220.156	206.845	223.061	211.492	187.041	198.417	202.162	213.492	190.537	206.747	199.639	210.631	199.288	211.986	218.948	199.404	237.776
ENSG00000116489_CAPZA1	49.321	53.285	54.9226	207.178	185.512	219.754	197.519	180.024	174.189	217.795	236.578	215.078	225.577	194.368	210.632	218.549	220.835	227.614	185.18	211.348	193.038	198.266	220.401	203.695	215.233	193.944	216.593	214.542	194.849	192.138	218.517	198.182	189.033	212.66	213.62	240.635	205.086	205.131	222.346	230.033	223.778	219.499	217.345	197.206	206.077	222.625	216.02
ENSG00000167283_ATP5MG	50.7309	52.5574	56.6489	210.947	200.109	202.649	243.267	233.997	209.512	211.471	204.376	224.155	239.257	232.322	205.156	185.522	238.879	187.633	212.439	205.97	214.963	222.437	201.639	231.957	208.879	201.31	234.385	201.732	223.966	245.174	236.998	194.237	221.968	228.102	202.431	206.464	220.182	202.721	206.176	211.382	207.846	206.728	227.409	203.53	204.636	202.498	212.106
ENSG00000100714_MTHFD1	48.1535	52.9241	55.9252	230.9	172.387	210.384	188.408	172.959	167.48	238.027	259.756	223.469	208.017	199.798	213.55	217.553	197.552	229.617	192.063	226.083	187.059	205.76	217.586	191.401	215.045	199.673	203.737	228.309	182.321	208.436	190.229	224.413	212.846	194.266	210.546	220.257	182.408	223.778	217.158	226.543	224.369	217.05	183.787	217.448	224.228	222.402	194.625
ENSG00000228502_EEF1A1P11	48.4589	52.5618	62.2429	205.858	190.749	206.401	256.799	236.764	223.423	208.614	250.968	220.315	297.384	193.898	228.968	134.391	275.172	161.07	199.883	211.867	161.954	187.129	208.497	184.202	258.231	227.202	280.757	259.82	242.981	193.815	218.541	206.76	185.712	212.002	272.669	260.787	268.357	191.168	265.024	207.431	208.628	157.974	200.543	175.071	204.592	225.733	227.826
ENSG00000147684_NDUFB9	47.9248	52.2958	55.5948	249.606	191.017	215.815	205.255	182.082	220.083	177.452	222.441	214.924	184.136	176.104	171.563	166.697	196.243	202.672	197.822	217.576	198.091	238.747	197.488	222.192	193.745	227.478	219.611	242.974	225.952	188.08	208.753	213.445	247.256	196.383	201.038	175.533	211.976	211.754	162.152	209.613	213.018	237.519	227.379	243.947	205.163	233.417	186.187
ENSG00000131051_RBM39	50.4474	52.5127	54.8254	203.032	208.794	206.562	189.951	226.013	204.635	207.359	242.447	219.191	183.65	248.849	217.204	215.135	188.996	201.565	214.186	206.898	223.682	219.338	213.862	231.281	217.851	250.36	190.166	218.665	186.086	215.378	201.701	202.055	203.819	203.902	209.91	228.951	204.236	221.083	200.94	195.425	224.995	217.829	193.434	216.039	235.626	210.192	187.54
ENSG00000166794_PPIB	48.511	52.4572	56.147	180.492	213.997	267.351	220.739	225.579	211.676	241.116	208.393	211.265	185.509	248.3	175.217	187.715	205.747	224.28	231.054	223.584	200.385	214.947	205.035	219.858	174.276	235.091	205.236	201.809	220.845	201.908	198.505	205.039	240.936	224.691	172.566	143.47	192.557	200.662	169.322	189.607	215.276	247.619	201.002	217.738	231.693	176.602	244.147
ENSG00000173113_TRMT112	49.0712	52.0945	54.8294	213.253	209.025	197.268	206.084	262.73	214.597	205.033	184.905	197.62	194.903	234.186	197.667	187.083	214.705	209.776	219.795	216.394	217.793	222.228	191.164	235.501	205.583	244.025	207.731	219.495	207.119	231.398	233.805	202.143	210.539	218.784	186.971	202.002	215.032	198.74	189.332	191.674	188.268	187.736	231.529	209.709	222.166	175.255	195.957
ENSG00000197157_SND1	49.2549	52.6357	54.8265	223.446	196.195	219.419	201.125	190.766	200.276	227.281	208.651	213.781	200.42	195.903	210.881	228.419	181.629	237.402	207.237	217.684	212.907	205.081	228.201	199.493	213.946	202.823	174.446	210.204	193.027	203.868	182.14	230.223	231.025	181.258	211.401	212.618	195.696	218.968	212.161	223.355	211.556	227.696	174.624	238.34	212.179	203.468	180.459
ENSG00000115875_SRSF7	49.791	52.2087	56.578	204.064	199.083	201.7	196.344	278.611	235.102	186.18	230.75	191.624	185.369	269.332	188.024	211.151	209.679	220.866	226.251	204.613	266.316	254.79	205.799	282.485	188.194	254.168	209.25	201.536	199.408	277.202	208.232	202.608	215.089	217.899	170.384	209.511	208.419	211.74	183.811	194.267	193.419	224.491	226.333	207.644	260.874	202.818	218.487
ENSG00000230629_RPS23P8	47.2934	52.2664	59.7829	221.592	186.533	212.902	234.648	246.918	229.147	206.404	243.032	211.04	250.865	193.901	198.034	133.192	274.552	151.82	173.472	226.009	174.348	178.056	217.432	176.537	247.806	198.552	295.525	242.257	207.091	195.942	214.615	217.002	186.915	193.744	253.195	264.349	240.626	193.209	265.507	216.007	201.798	179.735	187.828	166.692	202.84	194.662	214.051
ENSG00000256148_-	45.0326	52.2271	60.2668	219.654	181.563	185.32	210.585	249.349	258.196	204.369	241.515	210.391	274.174	171.201	191.268	123.592	244.291	165.827	191.831	215.207	179.653	187.265	231.619	188.963	278.35	199.721	303.357	260.856	177.443	201.41	161.14	227.008	167.119	172.02	264.379	283.136	227.724	193.686	253.076	178.088	215.133	131.515	214.687	140.197	207.425	220.191	239.723
ENSG00000013306_SLC25A39	50.2949	52.6266	56.6448	218.227	212.114	217.475	205.766	227.158	239.334	218.084	171.554	208.862	199.917	217.313	193.739	235.803	200.55	233.571	234.288	208.899	219.93	227.343	198.683	233.256	207.432	207.557	190.849	189.484	230.558	203.07	214.435	244.514	239.369	206.01	205.77	172.623	194.674	224.844	200.224	206.867	212.276	219.712	205.838	246.223	199.213	208.757	212.708
ENSG00000170906_NDUFA3	49.0478	52.1005	55.7549	290.845	210.212	217.046	213.193	208.893	205.93	243.758	187.221	225.188	198.847	235.685	204.355	197.545	162.918	178.793	218.882	230.354	193.045	207.91	207.868	228.354	197.772	209.939	213.325	234.428	188.199	242.621	199.623	216.381	220.842	204.111	214.447	169.292	177.717	207.095	198.321	194.554	223.745	190.048	195.74	230.501	217.041	258.092	169.577
ENSG00000168036_CTNNB1	50.7863	51.9216	53.6627	199.929	184.154	206.983	185.846	222.042	207.707	193.295	234.359	213.893	197.505	202.935	209.589	210.426	215.509	207.58	204.118	198.295	225.974	203.776	199.178	229.787	208.803	214.458	206.283	204.672	207.01	212.984	218.641	197.479	204.645	221.597	214.663	220.057	200.988	186.723	218.885	240.523	213.48	205.583	212.055	214.614	209.341	206.792	207.667
ENSG00000184117_NIPSNAP1	48.6153	51.3385	53.6318	204.393	203.398	199.427	220.739	206.208	204.499	200.987	180.668	192.531	193.447	213.485	194.141	220.17	219.881	198.848	208.238	207.457	215.728	214.529	198.775	209.196	185.525	214.524	207.902	183.751	225.228	210.315	234.412	207.118	212.399	226.515	190.593	184.153	217.91	195.424	198.523	193.125	190.367	204.409	217.789	202.851	210.778	179.542	219.942
ENSG00000244313_-	47.3406	51.9199	58.2637	214.298	202.422	203.004	240.732	239.534	243.169	224.957	219.184	212.488	255.341	194.313	215.423	148.627	235.754	169.001	191.423	220.825	184.44	202.731	213.005	188.675	246.461	186.295	270.283	224.29	195.969	199.299	181.145	204.717	193.507	182.366	246.586	243.696	216.634	210.642	245.133	176.066	204.462	182.873	185.298	211.652	174.042	236.203	202.42
ENSG00000099341_PSMD8	50.1222	51.7332	53.5853	218.95	208.515	216.758	201.866	199.468	200.03	217.735	178.134	207.027	194.938	209.133	197.702	219.409	197.387	222.095	206.238	214.064	212.495	206.685	208.623	221.062	193.387	206.839	207.773	203.632	203.172	210.301	206.71	208.97	228.89	204.775	195.325	187.403	199.155	212.667	191.15	204.522	203.672	214.434	223.404	225.997	204.612	214.61	212.413
ENSG00000168488_ATXN2L	48.459	51.7134	53.2891	174.278	236.26	197.377	233.039	212.245	202.469	213.194	176.588	211.183	186.556	213.654	193.76	226.452	191.866	221.284	231.597	201.566	202.163	211.529	198.225	225.839	197.475	192.21	177.003	203.49	207.778	210.107	175.305	221.427	208.949	179.358	207.066	180.96	194.064	206.641	200.438	208.87	214.623	213.045	197.586	235.127	211.304	207.722	191.449
ENSG00000155463_OXA1L	46.6427	51.7501	55.8541	223.895	212.959	226.768	196.052	174.898	200.173	217.653	209.097	247.353	234.225	189.126	231.425	224.537	204.975	199.267	157.836	205.874	202.644	206.859	200.87	218.193	217.703	176.195	168.199	217.156	167.536	181.148	202.08	184.664	226.982	207.142	170.576	185.719	176.867	241.839	212.087	207.578	235.756	234.305	216.285	228.46	191.558	221.98	178.885
ENSG00000105669_COPE	46.208	51.5059	54.3958	212.363	228.339	226.116	217.843	216.803	237.877	210.143	176.335	177.773	188.89	207.397	160.537	205.305	191.556	206.742	213.512	184.785	208.433	220.07	197.455	211.009	180.941	211.908	168.969	198.314	244.181	218.443	208.167	220.767	223.972	193.895	159.335	152.71	200.512	215.771	183.076	180.618	177.973	223.725	204.728	242.779	191.9	184.973	200.097
ENSG00000116030_SUMO1	48.4073	50.8404	53.506	188.815	184.453	193.935	188.073	217.233	191.995	178.266	225.365	202.057	218.528	202.047	211.426	212.003	222.641	202.066	184.418	187.659	193.527	202.448	215.91	200.628	214.288	213.232	215.787	200.587	205.953	219.693	264.598	205.348	202.276	211.463	203.587	212.32	215.097	191.584	195.314	194.259	192.591	208.368	240.14	174.301	211.043	203.137	211.785
ENSG00000136930_PSMB7	49.7348	51.7138	53.26	219.518	171.097	217.13	190.366	212.465	200.427	209.723	213.787	208.603	200.073	187.391	196.127	208.326	211.469	211.976	195.288	223.118	204.829	206.85	194.642	199.341	213.231	201.764	204.196	221.661	195.188	213.549	202.057	189.669	219.872	206.86	208.422	211.107	207.711	198.891	198.562	208.021	204.177	213.914	188.73	213.512	199.084	217.596	204.333
ENSG00000140612_SEC11A	49.0333	51.0432	54.01	191.993	211.938	203.073	207.662	188.527	177.732	207.616	217.625	206.69	245.193	197.153	221.647	200.78	238.775	197.52	195.945	213.564	189.566	191.533	202.053	198.477	205.272	212.646	224.78	193.53	214.14	199.967	218.465	189.879	216.39	222.624	193.505	224.824	223.396	190.588	199.712	211.519	199.085	199.175	214.99	192.6	205.501	196.7	228.282
ENSG00000104852_SNRNP70	49.0451	50.7271	57.2687	228.508	218.339	207.404	177.113	243.236	232.602	236.125	210.982	202.476	196.152	216.086	177.531	197.322	177.11	243.904	197.944	201.726	228.061	209.854	219.834	201.104	202.714	231.308	186.19	194.126	215.461	230.747	196.265	229.263	233.639	197.341	189.504	194.951	161.484	238.197	198.514	199.797	192.336	225.001	191.988	229.405	232.932	201.627	203.102
ENSG00000140374_ETFA	47.8334	51.0912	53.3901	192.698	203.157	205.905	173.266	186.606	208.016	197.459	227.879	174.126	193.728	208.816	210.095	225.184	225.573	203.814	175.28	209.548	212.644	208.182	174.476	213.866	184.886	238.805	185.373	202.177	205.952	199.801	244.918	209.767	186.897	204.916	238.458	236.745	209.43	193.219	192.205	231.192	191.043	214.248	196.13	168.403	216.754	199.662	173.809
ENSG00000123131_PRDX4	49.1545	51.0689	52.4577	205.26	180.422	208.225	180.489	208.283	200.351	208.232	215.956	208.188	196.486	196.015	185.202	234.078	205.39	228.79	199.921	213.306	222.631	204.326	204.225	206.254	200.287	200.01	184.216	209.531	186.21	203.68	207.2	197.666	230.844	209.931	197.383	212.178	189.217	220.621	190.982	194.585	197.013	224.795	198.632	222.706	197.316	204.729	193.021
ENSG00000105223_PLD3	47.9059	50.6773	53.3476	192.849	228.288	219.525	214.973	183.304	219.92	204.462	164.54	193.213	187.325	197.224	195.158	219.482	181.776	226.448	213.381	201.798	203.62	212.144	199.636	196.207	189.641	200.687	191.215	173.582	232.648	196.049	190.065	230.406	234.232	186.102	204.688	185.91	206.785	208.03	193.915	204.982	194.202	213.394	208.279	236.479	203.915	185.059	209.993
ENSG00000104341_LAPTM4B	49.1578	51.1089	52.3398	201.555	189.393	215.784	193.678	193.984	197.544	202.675	210.957	207.892	208.569	196.624	209.379	196.002	206.511	209.753	196.712	189.924	217.55	206.136	200.783	222.196	204.672	202.897	191.725	208.218	202.036	239.217	209.3	196.449	200.606	206.635	203.133	196.653	195.186	196.106	208.932	222.757	214.979	204.639	205.418	204.232	196.515	214.205	221.786
ENSG00000143569_UBAP2L	46.5167	52.5956	54.8636	210.31	176.498	212.423	175.554	212.007	179.368	223.285	197.035	217.836	203.827	195.805	202.852	231.546	152.75	232.602	190.192	217.762	211.995	202.998	221.27	224.797	220.254	194.707	161.69	229.61	149.732	199.046	155.464	210.455	219.554	184.691	218.154	199.197	147.711	225.389	211.37	214.613	219.463	217.033	181.3	225.18	203.302	219.43	150.587
ENSG00000174021_GNG5	48.4435	50.8549	53.603	218.407	215.106	200.316	241.745	195.375	189.99	191.9	162.006	214.072	211.388	167.616	208.305	201.658	216.257	207.309	179.86	228.374	227.516	193.509	199.737	203.88	215.111	204.135	228.27	211.488	211.051	201.355	207.547	184.424	210.754	234.886	214.525	190.477	208.589	196.969	173.681	174.995	202.959	201.994	197.647	141.648	194.568	216.102	201.016
ENSG00000228716_DHFR	48.622	50.7162	51.6802	203.846	180.069	214.198	173.537	194.02	158.289	204.522	244.36	213.43	213.479	193.813	206.297	200.532	203.718	203.968	175.867	203.948	185.952	195.89	209.232	200.622	204.248	203.396	199.864	208.75	186.119	204.655	203.964	180.709	188.03	201.5	206.862	229.584	201.525	199.561	202.333	214.83	216.813	204.931	200.974	192.002	207.939	201.05	201.512
ENSG00000126457_PRMT1	47.4749	50.6156	55.0354	220.656	209.458	206.131	181.167	228.025	251.144	194.925	188.029	180.035	180.314	197.374	190.054	207.517	193.379	227.626	224.684	202.649	250.146	219.823	217.015	214.59	180.613	206.404	177.114	190.728	220.248	206.766	210.705	230.079	230.438	184.334	191.151	177.788	186.319	228.671	192.208	193.107	187.211	211.793	194.138	239.391	202.276	198.874	189.848
ENSG00000149923_PPP4C	47.1922	50.4445	55.4174	206.954	222.913	184.41	193.25	239.408	241.28	201.449	194.383	180.435	197.408	227.25	200.847	226.276	203.537	209.605	241.386	202.107	217.001	230.035	206.913	238.483	185.533	184.93	179.691	192.587	217.939	227.373	204.26	217.111	243.655	186.68	186.019	179.372	180.789	208.418	193.8	198.021	187.872	213.839	196.259	272.822	191.459	184.604	192.728
ENSG00000065911_MTHFD2	45.5915	50.6793	53.3619	184.68	205.668	189.6	211.814	156.992	168.254	210.595	221.086	233.235	220.339	171.797	205.118	193.219	216.246	202.137	184.746	207.163	156.546	184.57	190.675	162.504	199.648	203.297	201.122	181.231	235.841	172.387	210.78	173.986	180.236	181.631	209.777	229.741	220.853	170.232	213.668	247.601	213.714	193.389	204.775	188.969	212.786	207.211	224.584
ENSG00000228474_OST4	47.5783	50.3936	54.3716	220.742	170.437	193.198	205.666	257.923	196.67	210.024	161.001	205.846	201.866	202.824	208.554	174.098	215.938	183.144	190.159	217.578	225.463	204.955	186.255	217.213	197.784	221.697	223.599	226.228	196.2	224.458	217.622	193.902	214.07	248.381	201.283	173.064	198.649	198.014	184.58	195.97	192.901	181.595	230.375	161.887	189.572	204.415	190.777
ENSG00000102030_NAA10	45.4126	50.3869	56.943	202.399	237.41	258.407	163.42	192.37	214.122	224.466	199.323	168.962	196.111	251.592	173.921	220.079	172.231	235.748	189.568	239.922	218.959	214.736	207.994	219.845	191.712	182.951	166.332	214.845	196.852	236.254	199.558	265.522	245.654	221.162	178.994	190.651	178.67	228.874	174.431	200.696	181.217	236.445	173.268	230.988	195.896	177.139	215.991
ENSG00000164985_PSIP1	47.8471	50.5336	52.836	217.691	186.671	199.254	181.209	174.022	175.004	204.296	238.713	195.98	220.07	190.142	191.537	201.017	208.775	205.114	185.357	206.754	179.351	200.626	207.706	205.424	197.948	213.059	212.309	185.477	194.502	197.065	212.958	212.182	189.875	203.252	191.339	224.499	229.791	208.83	215.625	204.797	199.741	198.89	199.75	188.977	215.213	206.033	207.797
ENSG00000100075_SLC25A1	44.528	49.8665	52.915	189.903	224.822	181.808	222.313	214.237	208.317	207.809	157.606	173.947	168.746	217.197	188.74	199.617	206.946	186.714	228.476	194.664	212.882	209.625	177.453	202.966	176.756	220.233	201.589	182.114	239.066	217.41	204.288	193.924	219.333	212.339	170.691	156.526	209.364	180.088	167.529	176.546	168.709	199.315	190.065	200.788	192.266	155.327	203.296
ENSG00000113810_SMC4	48.1747	50.3141	53.1776	201.841	191.87	217.217	172.393	193.058	173.526	214.118	257.431	221.108	208.074	196.347	209.243	216.403	191.435	211.543	185.926	212.733	191.793	192.966	223.578	195.868	212.643	200.672	186.159	201.871	186.081	194.289	193.955	192.609	177.761	197.063	202.24	237.991	200.54	212.787	202.998	219.694	211.074	209.438	199.415	187.551	199.428	219.143	207.226
ENSG00000132780_NASP	48.7937	50.3489	53.8593	220.754	194.717	215.478	161.183	199.771	197.826	214.827	250.2	198.139	199.813	198.149	187.011	215.314	185.66	210.355	192.41	214.345	190.969	209.935	217.363	221.119	202.259	214.143	190.029	198.288	187.558	203.339	194.896	220.756	226.984	194.106	200.328	217.414	193.206	232.082	200.532	217.196	197.516	228.001	196.012	212.147	213.318	198.411	209.098
ENSG00000112081_SRSF3	48.1767	49.996	54.6563	198.014	173.004	194.141	181.315	256.823	232.26	213.983	220.173	190.076	198.651	271.259	201.483	203.75	202.748	190.85	241.629	193.955	264.675	255.647	200.049	272.304	192.291	258.271	199.919	212.304	184.43	266.547	189.784	191.176	198.658	194.607	187.718	207.976	177.267	199.077	195.543	206.305	194.969	200.442	185.125	213.498	259.824	199.218	200.287
ENSG00000198868_MTND4LP30	42.9905	50.6777	59.6011	201.023	228.976	205.437	220.798	208.465	210.803	208.126	188.199	261.931	239.273	172.768	242.448	125.741	171.075	159.241	207.306	203.226	170.204	202.196	235.798	181.999	301.72	165.534	252.82	259.373	170.3	182.572	162.489	195.519	131.842	167.857	309.576	240.833	215.278	225.121	281.627	198.23	256.395	171.693	190.276	160.138	198.628	285.425	178.578
ENSG00000188612_SUMO2	48.0816	49.9292	52.0492	192.229	199.838	199.628	201.63	186.095	185.913	201.242	222.697	199.105	211.582	207.294	199.624	196.038	221.065	195.243	182.556	183.804	201.009	200.475	193.146	192.797	191.527	208.67	208.498	183.597	202.961	198.155	218.803	183.409	202.75	219.44	191.425	214.514	217.742	192.612	192.837	201.828	192.231	203.178	213.969	183.168	199.806	195.087	219.692
ENSG00000244687_UBE2V1	47.1611	50.2598	53.1871	202.392	193.651	237.095	203.844	183.619	168.21	216.72	244.131	224.528	229.143	194.446	215.673	200.825	180.968	217.895	187.81	201.254	188.313	207.812	202.346	195.161	211.127	213.289	172.597	210.854	170.662	191.06	191.738	194.245	193.916	176.808	224.769	222.956	176.292	205.544	211.055	198.106	220.947	204.647	206.595	183.683	189.639	194.659	186.712
ENSG00000234797_RPS3AP6	45.8777	49.8424	53.6631	199.87	187.78	190.666	209.833	199.75	176.419	198.083	225.854	202.037	247.147	188.604	216.241	152.63	244.788	176.543	171.585	198.989	181.393	166.797	201.061	179.739	225.259	198.785	230.148	223.875	195.724	186.507	204.851	180.483	183.441	206.999	226.39	247.011	225.2	183.721	229.183	201.918	201.938	168.189	186.083	172.357	196.189	209.887	203.494
ENSG00000081154_PCNP	46.1532	49.6884	51.4678	184.069	199.858	198.849	202.056	182.065	168.355	205.901	219.543	202.636	217.621	201.426	214.269	193.483	202.88	179.796	187.157	208.606	180.528	182.547	204.263	207.498	180.182	195.695	202.615	191.75	185.235	192.138	220.116	171.217	173.476	234.098	209.875	222.446	202.04	184.406	190.305	205.783	208.836	189.859	198.658	162.633	196.575	189.139	204.498
ENSG00000089693_MLF2	46.3084	49.2482	51.8273	192.848	220.736	195.802	188.689	208.901	216.002	207.705	161.318	185.448	176.107	209.278	175.691	201.679	185.162	200.911	198.485	190.881	214.89	198.183	185.66	201.115	170.792	203.587	179.489	191.725	219.217	202.347	191.59	203.648	222.704	206.12	178.228	161.092	194.057	210.139	180.176	175.229	182.29	209.631	186.36	210.21	199.884	188.113	205.59
ENSG00000117519_CNN3	48.5071	49.5242	51.8912	195.481	191.559	198.141	192.93	193.045	176.954	190.814	218.578	208.197	207.715	198.027	210.835	195.255	207.115	204.164	188.224	195.406	196.558	200.409	198.523	205.159	204.642	193.75	195.919	202.201	197.287	198.053	216.992	180.826	180.719	217.986	203.957	212.338	202.889	187.958	213.531	217.918	218.062	194.863	208.51	184.93	197.152	196.237	202.697
ENSG00000042753_AP2S1	46.7955	49.443	50.6935	194.055	202.474	197.14	217.931	213.492	204.577	202.874	159.604	187.1	188.431	210.986	198.215	202.137	212.013	195.012	206.936	199.577	199.854	199.248	182.839	217.714	187.426	198.542	181.351	178.649	198.028	197.379	200.171	187.061	224.501	202.36	191.67	174.703	189.532	178.105	183.723	196.588	187.925	203.049	200.194	210.032	186.194	174.835	197.517
ENSG00000154723_ATP5PF	47.0508	48.9246	52.1034	187.08	173.163	180.607	179.177	211.874	189.028	214.225	215.542	207.786	196.007	212.406	198.134	188.901	237.2	200.634	185.225	195.311	206.943	187.158	189.77	212.248	187.266	211.853	204.044	208.623	189.515	214.854	203.707	195.39	220.457	216.636	193.464	205.758	182.814	202.889	187.971	194.874	200.428	193.185	202.213	186.612	189.339	194.134	179.606
ENSG00000163466_ARPC2	47.2984	49.3288	50.5368	197.751	191.711	195.628	188.966	208.723	187.443	198.094	230.966	196.222	197.988	198.467	183.924	197.019	209.108	199.676	182.283	202.35	210.047	192.063	185.149	218.592	190.054	199.093	201.539	195.861	186.274	201.287	204.047	181.94	211.821	209.319	192.083	198.311	201.221	194.264	184.003	191.83	188.519	188.401	208.389	188.48	197.611	189.876	209.069
ENSG00000166913_YWHAB	46.6893	49.5161	51.5718	200.015	170.461	194.082	160.062	192.662	185.945	195.371	235.908	202.572	196.502	198.069	203.22	209.529	182.319	209.963	185.542	189.193	202.826	196.387	207.78	211.888	191.072	201.992	168.892	206.776	172.776	206.524	190.359	194.104	205.577	183.651	198.06	212.292	174.457	195.511	204.721	211.822	203.96	216.944	172.633	205.171	201.708	208.935	184.691
ENSG00000156411_ATP5MJ	47.4806	49.3194	50.4488	199.192	184.253	201.773	197.343	201.179	189.198	205.239	223.456	190.265	203.72	196.796	193.898	201.803	197.563	183.916	189.9	199.309	202.211	192.435	197.212	202.509	199.903	200.335	205.659	213.453	189.793	199.828	203.12	181.63	185.656	195.635	198.844	200.628	188.59	192.977	182.897	193.873	196.716	176.844	212.681	189.991	182.18	194.547	206.82
ENSG00000089006_SNX5	45.5343	49.3719	51.8975	192.234	200.764	203.203	197.601	178.031	155.802	221.315	236.434	208.086	217.162	184.809	218.255	204.845	188.274	192.448	172.394	201.733	190.363	179.955	202.004	182.115	211.49	192.951	197.374	206.102	175.303	180.991	199.285	181.022	178.941	209.584	215.131	216.238	180.727	199.34	206.049	215.106	220.605	193.468	203.782	182.203	183.826	195.44	176.757
ENSG00000256338_RPL41P2	43.525	48.9731	54.0013	215.537	186.864	194.734	218.816	230.08	216.161	203.983	201.717	214.469	254.771	185.097	187.39	127.556	217.707	147.655	177.676	197.667	159.725	166.069	182.096	184.512	223.008	167.5	255.695	264.064	209.177	174.304	197.051	181.231	165.645	157.652	229.957	209.963	202.606	206.183	238.239	174.032	181.176	158.058	204.25	166.19	159.933	223.311	181.639
ENSG00000143727_ACP1	45.5045	48.6069	51.0492	182.719	195.274	207.061	200.615	170.659	153.998	199.605	213.702	204.9	210.714	174.787	207.492	181.417	204.306	183.785	165.302	173.536	169.672	181.105	191.947	181.972	190.47	184.875	206.701	206.205	201.141	187.406	214.551	170.92	183.46	212.955	191.21	203.871	197.551	193.581	196.667	199.846	199.905	182.155	211.551	177.961	187.029	196.342	201.368
ENSG00000213465_ARL2	45.164	48.7046	51.3501	205.032	218.323	196.648	205.523	204.411	207.611	192.616	144.733	169.439	194.157	203.752	192.403	193.705	195.756	205.945	207.892	181.044	209.846	204.783	176.478	212.394	170.846	190.725	193.307	180.527	227.226	195.528	200.268	191.06	227.947	190.253	171.641	165.5	185.079	196.508	175.269	173.257	166.755	209.259	208.835	200.343	189.466	174.84	195.48
ENSG00000267855_NDUFA7	47.2422	49.3888	52.2966	199.304	199.553	214.944	210.762	221.106	189.365	209.387	180.527	219.742	226.298	230.39	185.164	201.051	189.117	179.176	206.332	205.901	208.423	195.193	195.112	193.886	173.864	194.472	217.037	188.919	208.058	204.66	166.348	184.932	202.744	211.432	195.029	180.489	190.964	183.09	208.586	197.757	224.217	53.2918	195.673	237.761	190.098	197.353	183.11
ENSG00000109606_DHX15	45.3875	48.825	50.7094	189.766	179.779	198.848	172.667	181.945	168.931	197.927	224.894	206.221	207.325	180.637	213.829	201.614	177.564	194.661	176.107	195.939	187.31	184.769	198.083	197.666	194.477	190.354	175.077	212.369	168.316	187.991	196.794	177.21	171.101	203.246	200.197	209.065	181.418	196.035	205.175	213.072	203.999	197.173	207.205	190.418	185.622	198.816	182.59
ENSG00000168003_SLC3A2	46.4186	48.2277	53.4677	179.501	214.466	184.901	216.87	213.332	228.205	191.344	185.021	192.234	180.002	219.222	186.088	193.588	188.429	210.537	228.603	192.011	207.12	221.775	187.492	209.82	190.003	204.619	168.217	179.659	222.587	208.473	184.098	196.603	215.089	169.789	189.094	187.884	184.318	200.337	188.496	224.186	185.537	199.226	180.262	237.961	214.051	191.853	205.537
ENSG00000155561_NUP205	46.8368	48.9006	52.765	192.405	184.781	192.292	197.501	180.024	161.473	193.107	226.078	219.498	214.215	178.652	224.484	208.461	200.104	191.254	192.424	192.186	188.458	197.592	198.073	195.691	212.378	196.705	184.05	211.927	180.725	188.339	198.816	185.572	165.887	204.735	216.33	226.547	186.445	184.89	219.937	231.609	213.828	198.031	191.679	192.11	195.514	207.702	187.016
ENSG00000132676_DAP3	46.2376	48.5902	51.5684	191.793	192.422	203.561	184.698	179.24	194.356	195.435	225.623	190.542	216.139	214.946	182.845	204.652	193.669	208.584	174.85	206.236	183.161	172.129	198.588	191.624	201.701	191.754	194.366	207.655	164.357	201.22	177.868	166.472	193.605	177.404	198.416	252.493	206.286	185.707	180.639	210.033	214.171	196.873	186.829	224.411	219.562	187.094	194.567
ENSG00000165732_DDX21	45.4184	49.3907	53.2475	201.605	181.224	204.328	153.478	180.716	161.995	200.47	252.311	212.392	218.44	181.558	216.24	212.061	174.606	207.311	177.268	203.167	182.021	183.557	215.504	185.125	213.106	179.115	179.524	212.643	176.438	179.779	198.367	196.759	184.903	185.288	214.394	237.034	183.246	206.534	219.185	219.422	221.664	207.783	191.267	196.454	189.197	215.285	192.315
ENSG00000130725_UBE2M	45.8807	48.4374	51.3794	205.6	222.734	178.215	195.124	211.251	222.395	184.749	178.683	181.983	182.196	194.1	176.313	205.272	206.533	192.73	202.794	190.76	213.61	191.454	188.952	191.813	189.46	180.436	200.91	181.506	233.719	183.114	203.31	194.293	205.825	201.451	168.247	169.323	193.443	209.3	184.83	194.056	174.206	189.579	208.389	222.487	190.049	199.836	198.107
ENSG00000122218_COPA	46.6575	48.4816	51.3494	185.188	201.771	188.767	242.15	180.417	155.053	197.444	198.943	215.735	205.699	190.331	212.26	207.153	198.517	181.253	175.177	194.61	186.279	193.256	192.162	190.052	202.433	195.776	192.807	189.816	187.684	197.357	207.031	188.562	177.948	211.846	206.46	208.64	194.596	168.535	204.493	211.053	219.244	189.251	183.881	182.688	183.639	189.457	197.812
ENSG00000186184_POLR1D	47.165	48.6612	50.7351	206.966	185.954	193.595	210.059	182.607	165.739	205.447	199.075	200.144	199.51	185.567	218.681	205.361	196.847	194.064	184.55	212.464	189.351	173.686	199.673	188.05	194.484	197.35	205.398	191.68	191.899	180.251	211.976	200.05	214.004	203.089	183.168	220.683	193.314	188.634	188.995	193.142	188.739	190.819	202.495	184.734	196.753	194.805	195.716
ENSG00000280987_MATR3	39.345	47.6598	52.793	196.614	153.37	214.325	177.058	179.685	78.0955	123.381	138.185	203.743	182.691	205.631	238.199	236.716	221.33	220.062	162.47	190.548	210.42	205.648	218.676	211.029	140.953	135.407	195.991	142.844	181.295	197.708	215.409	170.635	211.219	170.358	162.402	214.595	122.631	210.411	155.706	189.929	221.801	131.702	122.666	190.73	218.105	172.525	208.412
ENSG00000163191_S100A11	46.1995	48.027	49.8879	187.79	184.249	188.838	206.918	186.854	171.18	202.532	161.692	178.622	188.558	201.928	191.248	199.13	206.519	213.824	188.971	202.38	182.633	191.442	197.253	181.997	184.882	164.112	199.692	208.888	194.561	191.598	181.77	188.892	198.883	216.023	188.088	192.617	196.535	184.77	184.291	197.723	199.064	196.737	205.42	196.311	180.53	218.362	197.715
ENSG00000073111_MCM2	45.2441	48.2819	51.8276	197.278	197.313	192.869	185.076	194.224	219.775	197.335	180.278	186.091	172.781	199.807	184.535	209.685	180.156	208.29	213.742	193.434	207.834	208.063	193.385	197.836	174.719	192.871	165.308	188.12	211.294	196.125	179.72	211.005	212.579	166.376	173.81	173.746	188.703	205.739	187.87	191.978	178.647	210.251	170.462	222.905	199.718	185.005	183.072
ENSG00000169223_LMAN2	45.7287	48.1704	50.5026	201.868	202.058	200.569	194.016	188.059	222.278	206.793	174.772	166.949	182.908	193.717	185.937	195.578	192.265	216.716	206.733	200.235	193.875	202.467	186.556	196.537	179.244	188.74	171.683	193.099	213.141	199.487	188.241	199.944	212.649	182.937	167.79	174.993	176.739	204.226	187.633	187.903	164.942	203.707	175.041	221.588	189.446	176.004	186.093
ENSG00000196924_FLNA	42.0678	48.1294	54.2057	212.913	246.412	212.112	180.722	212.643	240.228	219.045	160.544	167.077	162.447	204.205	182.437	217.415	156.123	215.047	221.773	213.636	223.167	201.309	207.81	189.6	170.078	210.337	154.374	182.644	211.789	188.609	167.669	226.794	220.717	158.63	160.085	163.931	170.995	223.759	170.403	178.243	171.005	227.946	155.975	222.829	195.435	161.094	172.065
ENSG00000141682_PMAIP1	41.0397	47.1838	56.113	157.354	258.443	170.144	248.979	207.052	196.965	166.761	180.122	178.283	200.681	210.436	185.505	149.893	271.46	163.775	197.644	154.797	205.785	207.904	165.311	192.331	165.424	225.496	247.449	151.803	266.874	203.851	271.6	138.409	142.072	258.126	174.092	180.509	261.495	144.444	173.268	173.819	191.966	144.607	264.248	139.808	221.32	163.503	265.747
ENSG00000079459_FDFT1	46.1043	47.8214	50.6497	186.645	186.456	204.359	221.237	192.585	171.02	188.609	188.131	190.27	188.525	185.905	211.361	191.843	212.055	184.717	180.482	189.18	195.246	195.956	179.73	202.994	201.413	204.001	205.124	198.942	165.871	207.719	207.506	177.826	184.317	238.661	192.288	188.417	200.362	171.718	197.507	190.728	193.264	168.787	205.796	175.407	184.078	174.501	193.014
ENSG00000249353_NPM1P27	44.6923	47.9335	52.6953	195.713	172.137	193.292	185.263	204.089	187.673	211.631	221.1	197.485	224.643	178.287	193.804	128.053	225.993	156.665	180.593	204.837	167.795	167.259	208.232	167.444	229.122	187.406	258.08	219.351	180.216	186.929	183.76	204.09	168.663	180.707	233.127	248.401	223.159	196.707	221.77	169.499	197.987	160.518	188.473	155.524	188.277	190.176	204.058
ENSG00000082898_XPO1	43.5642	47.9106	50.7987	200.841	178.104	210.409	168.383	173.262	154.994	195.039	235.601	201.68	214.91	172.642	203.432	178.2	156.427	209.915	170.897	191.056	160.403	190.776	201.752	201.987	209.706	192.229	169.013	204.252	172.714	204.629	195.516	166.992	177.242	198.473	189.887	217.26	187.949	172.215	202.484	208.108	212.125	196.298	187.62	189.681	189.07	199.256	188.349
ENSG00000170296_GABARAP	43.903	47.9522	49.602	198.671	192.083	193.922	175.818	195.149	198.582	173.853	190.155	208.221	195.76	176.351	195.622	196.7	195.699	180.866	186.02	185.721	194.836	175.211	166.206	224.458	172.279	191.534	206.221	183.903	167.543	210.729	163.328	173.354	201.272	176.908	214.62	189.368	160.52	174.825	197.885	159.14	194.12	224.415	193.754	215.998	206.061	182.891	175.543
ENSG00000154473_BUB3	45.6721	47.9662	50.2272	168.561	177.07	170.531	185.526	190.973	182.684	178.247	192.988	196.94	195.41	193.271	186.573	215.438	202.74	167.263	193.159	179.39	202.083	192.757	193.246	195.348	186.408	173.001	167.78	187.867	204.325	184.666	221.754	182.7	188.192	210.238	179.661	185.821	193.693	186.916	186.694	193.7	197.388	206.24	205.584	202.109	179.639	209.923	203.388
ENSG00000155368_DBI	44.6929	47.2347	48.9925	190.401	177.987	205.452	180.16	208.79	190.588	185.038	195.175	169.31	171.285	192.81	178.309	194.455	204.83	180.756	174.755	194.857	228.746	180.294	182.944	200.541	165.005	191.498	201.971	184.544	187.477	196.204	195.268	174.392	200.034	217.162	190.568	182.152	191.301	186.043	161.561	167.765	180.822	187.339	213.73	176.283	198.111	170.034	193.303
ENSG00000182117_NOP10	45.256	47.1852	49.9603	199.056	175.962	206.38	204.796	211.784	178.684	201.602	188.751	174.895	180.894	194.165	186.745	186.273	182.058	199.934	194.438	174.392	202.909	205.382	175.79	194.049	188.73	174.419	199.565	188.545	180.717	196.857	209.736	172.058	225.357	194.297	181.913	186.53	173.416	188.209	181.414	188.688	203.25	186.265	192.395	226.646	198.713	197.543	175.473
ENSG00000168268_NT5DC2	43.1216	47.6036	51.0159	204.366	187.988	182.175	175.09	216.317	213.029	193.327	162.742	170.958	163.64	201.146	158.59	210.098	175.077	205.197	194.146	192.828	203.635	204.206	199.615	214.493	170.724	190.882	174.045	179.227	177.981	198.018	172.979	198.899	217.219	166.26	180.556	153.027	161.084	209.484	172.322	191.882	181.554	216.903	170.32	226.168	189.947	190.92	167.336
ENSG00000130396_AFDN	45.5022	47.5381	49.9392	149.228	205.797	190.17	191.232	181.358	150.409	186.862	223.679	200.08	193.498	190.276	183.962	199.861	170.004	188.515	170.189	180.423	160.828	197.878	202.049	187.721	203.915	180.611	190.134	187.538	187.352	166.713	198.882	178.785	153.795	187.961	200.737	205.809	188.403	200.675	197.193	229.039	189.052	194.172	199.445	187.487	196.116	194.662	201.417
ENSG00000179262_RAD23A	44.5668	47.4502	49.6295	176.893	226.069	180.894	200.031	196.763	214.063	196.271	167.405	173.482	172.278	218.187	174.945	187.443	186.949	185.315	210.963	189.608	197.129	199.177	185.571	185.75	182.557	195.14	194.857	175.482	212.056	198.933	189.223	199.686	202.658	184.273	175.568	171.452	189.993	191.955	171.039	172.729	177.391	192.062	193.221	203.166	182.513	190.238	197.275
ENSG00000113013_HSPA9	45.5233	47.702	50.2126	184.22	170.64	194.917	171.133	176.646	161.276	188.576	229.954	209.497	203.856	176.785	194.869	212.455	189.274	202.294	173.617	190.3	181.596	186.399	205.203	181.453	199.585	187.313	180.963	188.667	187.286	174.746	183.585	200.959	190.4	183.976	196.37	221.087	193.093	194.985	201.73	211.693	196.211	200.526	174.236	201.321	195.608	197.574	191.216
ENSG00000154518_ATP5MC3	43.25	47.411	49.8057	165.076	157.223	178.157	190.163	231.257	162.465	160.342	180.8	199.44	194.148	197.296	211.313	166.372	214.89	187.154	200.795	176.87	198.57	204.952	196.571	183.422	197.944	213.161	170.856	192.654	188.293	182.026	170.172	140.249	173.586	207.414	166.946	189.125	192.623	172.22	172.804	188.333	193.017	193.407	203.218	212.208	199.579	177.164	192.031
ENSG00000135387_CAPRIN1	44.8725	47.479	49.9655	194.003	164.994	201.271	180.27	148.992	166.629	192.171	212.217	193.066	194.176	186.9	208.866	224.036	184.663	189.378	172.949	183.983	165.886	184.014	199.94	190.454	203.5	188.978	184.128	223.179	163.135	176.78	174.644	205.718	179.23	197.678	193.174	198.168	166.27	199.628	203.399	225.041	192.72	205.023	174.192	180.661	191.101	186.471	182.405
ENSG00000279483_-	45.1774	47.3465	49.9363	200.107	181.793	207.126	203.423	195.288	188.09	198.761	193.471	171.152	183.291	188.795	189.977	161.576	216.872	173.272	180.013	185.232	175.732	180.518	180.123	170.351	192.664	183.848	228.866	193.274	221.224	187.982	192.311	185.392	191.658	185.498	198.378	208.405	206.159	196.567	181.283	160.394	186.332	160.971	203.928	176.941	193.997	200.074	200.486
ENSG00000004779_NDUFAB1	44.9433	46.9594	49.9423	182.075	166.335	189.795	180.75	210.87	192.861	174.168	200.188	190.954	194.898	208.644	171.903	182.928	193.474	188.952	178.721	192.56	212.562	192.225	176.769	211.127	179.147	198.512	186.279	209.082	158.51	215.399	200.399	173.439	208.949	213.457	180.545	189.017	185.781	182.067	183.253	202.467	182.738	186.723	192.159	179.516	176.04	178.877	184.873
ENSG00000116649_SRM	43.3711	47.2161	49.777	205.362	173.387	196.905	169.204	196.047	190.543	221.169	173.777	183.494	201.192	188.857	183.873	216.577	153.581	223.725	186.641	196.432	195.902	193.403	184.752	188.829	188.871	174.976	172.865	194.027	165.982	188.106	161.328	209.109	230.88	171.238	178.693	172.011	153.867	199.686	189.363	201.459	197.374	221.874	181.906	231.424	171.554	192.049	158.766
ENSG00000213719_CLIC1	45.274	46.9281	48.7441	200.464	186.431	194.739	195.931	186.268	185.578	197.693	169.961	179.128	182.074	189.291	189.3	195.056	180.749	197.705	184.502	201.65	189.166	181.028	204.469	179.694	188.353	193.536	186.203	189.25	181.301	187.071	191.62	182.679	200.596	205.897	177.063	186.85	185.944	191.232	162.601	168.156	179.02	193.907	197.135	197.712	176.888	174.88	190.123
ENSG00000119705_SLIRP	44.3623	47.1246	50.3141	212.901	154.793	180.546	186.715	201.614	167.489	175.291	194.513	187.446	204.005	186.355	165.33	173.527	204.315	193.769	190.65	210.562	200.182	170.841	173.037	210.093	172.609	190.461	194.802	204.707	167.862	203.536	181.464	182.753	191.713	174.939	206.325	198.183	181.154	177.011	185.368	202.002	184.121	207.521	195.131	191.862	189.551	183.422	178.763
ENSG00000136450_SRSF1	43.4024	47.7564	52.1575	196.765	173.563	192.366	170.412	170.799	154.856	188.783	235.417	201.951	203.144	184.052	181.84	228.536	166.783	223.096	189.685	208.789	177.759	176.739	213.104	173.751	211.1	165.316	162.111	208.153	166.431	171.883	198.557	217.179	173.134	188.028	193.175	201.219	157.076	228.017	211.254	199.803	221.725	217.304	175.947	199.274	180.946	200.415	176.015
ENSG00000120802_TMPO	45.6879	47.2721	49.7699	182.664	178.402	192.085	157.656	172.838	173.742	187.381	223.992	200.739	199.474	193.924	188.113	205.553	190.864	207.776	176.82	188.689	183.015	195.801	207.183	182.176	190.83	183.336	174.468	183.055	186.492	189.71	187.889	186.793	179.304	181.079	195.89	219.283	179.827	194.201	197.898	204.821	189.488	204.537	183.2	183.1	209.226	206.069	195.621
ENSG00000140264_SERF2	44.2315	46.8131	53.0326	291.921	184.366	188.066	192.928	230.565	182.131	187.451	146.306	231.238	156.853	178.902	209.354	187.054	197.386	176.749	211.449	250.727	224.642	206.721	183.212	184.448	218.229	235.283	191.735	181.233	188.718	222.331	199.211	198.725	224.241	212.358	170.598	166.217	184.234	173.677	166.38	160.632	176.339	177.457	234.049	170.03	181.594	146.229	187.025
ENSG00000155380_SLC16A1	45.5652	47.3885	49.6637	189.233	168.426	192.786	165.51	182.621	160.549	182.175	225.569	203.169	186.345	184.313	203.195	197.675	183.726	198.981	176.691	181.599	186.378	181.012	194.285	196.05	203.13	186.832	169.074	202.39	176.126	189.875	194.119	195.394	186.098	181.34	194.172	213.574	180.727	189.887	201.255	217.377	208.958	197.67	183.668	194.118	183.421	203.811	182.518
ENSG00000084754_HADHA	45.9891	47.1649	49.2026	186.284	172.194	186.751	176.248	170.657	183.051	188.115	209.771	197.867	183.832	172.042	186.501	198.667	189.204	201.47	192.437	185.929	181.705	187.301	193.295	176.562	182.812	194.113	185.106	197.71	182.627	183.09	187.938	191.734	189.643	185.588	187.93	207.043	191.721	191.917	192.459	204.15	201.053	203.408	184.33	193.596	191.402	209.831	198.296
ENSG00000167792_NDUFV1	39.7227	47.1604	50.2366	199.594	250.634	192.955	155.142	222.174	222.435	198.118	159.34	152.437	163.149	213.026	156.493	183.497	163.216	189.477	215.425	191.555	199.419	187.806	194.955	195.127	158.741	198.396	157.402	160.379	240.313	194.576	167.59	208.61	225.649	166.023	141.962	152.89	186.61	209.117	161.742	152.588	155.753	189.569	155.23	215.093	185.398	150.101	201.397
ENSG00000062582_MRPS24	43.9895	46.7456	48.9139	188.02	209.059	196.007	194.571	206.632	197.826	179.013	176.116	167.042	165.358	190.931	190.783	190.261	213.044	170.691	207.647	189.958	189.236	190.831	164.341	205.075	161.967	183.645	168.158	178.205	206.903	183.142	199.262	194.203	221.477	194.6	182.664	156.004	188.682	175.905	179.848	173.104	166.554	176.179	183.71	210.951	185.945	183.671	174.98
ENSG00000132386_SERPINF1	44.4751	46.8224	48.6085	183.28	176.937	197.002	185.139	178.839	209.172	187.819	189.615	188.276	166.767	186.061	178.488	192.642	178.227	205.001	189.672	194.202	184.863	203.811	189.461	189.39	175.539	177.129	165.801	175.016	194.398	183.588	166.026	194.446	206.377	160.516	172.032	200.417	186.76	212.024	177.791	190.652	180.855	201.109	173.448	196.103	205.858	188.337	186.166
ENSG00000163463_KRTCAP2	44.477	46.7804	52.3773	198.98	157.361	177.49	231.255	182.005	179.918	154.788	187.476	207.285	181.79	172.218	194.218	216.854	172.644	224.147	175.54	181.901	208.63	249.253	185.922	228.574	182.127	210.113	187.96	179.163	185.724	211.345	193.388	176.96	250.708	186.768	209.802	162.54	211.227	183.388	192.323	169.699	188.574	177.44	203.474	201.628	179.525	238.068	161.381
ENSG00000235655_H3P6	44.3053	46.6509	49.7592	184.875	174.119	177.612	172.044	212.453	184.058	175.454	205.356	178.86	177.091	191.68	185.138	201.952	197.968	195.422	198.792	175.034	195.485	199.601	172.313	218.71	166.643	210.186	177.974	184.35	198.205	203.369	208.612	191.069	201.268	184.817	174.699	186.599	175.595	174.854	179.602	187.73	188.808	190.325	173.073	200.641	199.118	183.767	186.608
ENSG00000125107_CNOT1	43.9626	46.5582	51.0044	177.538	169.611	185.759	173.423	163.627	149.301	190.513	219.252	215.666	193.162	161.075	205.068	204.657	183.081	202.099	174.411	183.494	177.241	176.182	198.245	181.618	209.338	169.475	178.029	201.086	171.853	169.067	183.798	189.013	157.076	188.619	218.534	208.201	188.984	186.239	209.309	226.717	205.556	198.979	181.524	189.235	186.227	207.155	175.74
ENSG00000112514_CUTA	44.1899	46.4909	49.577	184.117	183.115	180.453	174.752	199.167	214.034	176.218	207.232	184.63	194.014	180.753	192.174	199.328	165.612	192.689	197.669	191.585	198.521	199.363	184.042	194.184	177.013	175.225	166.229	199.613	176.675	184.509	196.248	196.287	204.154	162.484	174.868	179.397	175.444	208.039	180.335	196.38	187.297	193.083	179.591	210.462	174.34	199.676	165.538
ENSG00000133706_LARS1	41.7083	46.6379	48.9814	187.304	156.369	164.682	157.565	145.298	158.596	194.639	196.354	194.043	276.638	191.718	185.297	216.106	191.259	181.215	166.803	196.413	149.635	181.285	191.045	157.486	185.799	168.936	170.982	182.421	191.829	163.997	158.687	246.074	166.924	171.106	205.993	225.248	184.054	187.575	233.021	283.388	263.295	227.773	166.479	192.019	194.488	190.584	174.952
ENSG00000101439_CST3	43.4248	46.0105	48.9732	183.171	187.863	177.895	198.822	192.81	195.785	186.094	141.361	165.222	173.924	189.501	176.57	206.631	175.664	189.219	206.487	185.648	179.164	200.847	186.791	203.347	151.357	191.232	166.056	157.676	214.514	203.174	175.627	194.325	207.579	163.068	172.541	141.894	195.929	184.914	173.624	181.971	176.426	202.694	181.665	210.258	173.379	165.296	180.933
ENSG00000184575_XPOT	43.4821	46.6723	49.0244	170.115	185.404	177.222	173.862	158.281	162.182	177.343	228.311	196.251	182.71	173.015	189.767	198.575	187.594	191.43	177.791	174.127	166.332	186.126	201.097	164.87	197.63	171.209	179.439	178.822	198.408	166.516	187.252	181.937	156.702	172.804	194.224	210.602	193.062	190.398	194.738	213.316	199.032	193.613	178.216	195.638	192.549	201.925	206.864
ENSG00000117593_DARS2	41.6607	45.708	48.6709	181.708	152.8	193.83	161.227	159.137	144.865	183.956	192.34	200.664	194.735	181.223	202.518	191.62	161.131	193.9	160.97	195.626	164.762	170.277	196.943	196.688	206.031	190.102	166.797	195.57	149.32	191.535	157.492	168.46	170.524	181.272	197.125	202.486	166.591	167.089	189.25	194.53	212.659	189.897	176.858	178.751	194.338	178.265	162.025
ENSG00000137106_GRHPR	42.9372	46.348	48.9421	189.413	184.739	191.713	197.563	171.479	197.063	204.736	167.944	167.755	156.037	186.128	169.828	193.801	174.971	209.146	190.663	205.768	194.536	193.984	185.621	170.661	194.457	172.557	160.989	190.031	199.303	183.818	177.799	201.142	216.855	169.53	163.865	173.632	186.662	202.178	163.803	185.163	166.623	196.179	181.557	207.86	181.45	182.433	184.743
ENSG00000151465_CDC123	43.7199	45.9255	47.6391	177.495	148.269	189.555	153.621	174.5	164.376	176.967	197.364	208.044	182.411	167.134	191.049	191.614	174.706	189.954	184.999	175.4	165.989	180.101	184.987	165.339	177.888	195.676	184.923	195.303	168.009	190.659	182.288	185.684	171.204	195.128	189.532	195.851	175.978	207.81	178.471	182.896	186.444	184.508	189.697	195.558	182.484	190.25	170.415
ENSG00000227615_-	41.2872	46.3967	53.2196	216.41	156.442	191.636	187.407	217.015	181.525	197.341	189.411	186.212	251.574	163.702	214.309	117.382	220.832	170.336	180.49	195.212	152.458	153.674	201.736	165.991	220.543	183.987	240.236	246.967	180.155	184.962	162.102	177.069	162.588	164.868	222.152	221.808	219.66	188.702	208.586	179.796	202.961	153.473	168.735	158.513	163.545	199.699	172.838
ENSG00000184897_H1-10	37.8849	44.9368	50.2319	161.709	261.83	151.329	186.315	240.088	270.293	152.173	137.282	149.488	165.848	221.298	146.338	148.089	204.408	155.566	239.851	161.408	218.816	198.549	155.001	193.324	154.416	196.755	192.505	148.291	292.589	187.13	201.721	178.44	189.28	182.804	136.659	138.11	220.825	175.423	148.397	154.577	139.391	170.461	181.055	195.154	185.908	139.191	217.504
ENSG00000088247_KHSRP	39.7817	45.6178	51.5887	180.175	230.636	188.336	156.178	211.855	229.159	177.861	159.62	156.44	154.528	211.85	156.351	183.236	161.524	197.563	221.288	181.707	202.917	207.019	196.475	204.362	162.146	197.276	158.474	159.931	217.885	211.566	161.344	216.068	203.163	155.021	149.409	151.379	181.491	192.96	158.442	170.255	158.962	209.644	154.885	212.758	192.289	159.77	193.179
ENSG00000203950_RTL8A	44.0274	45.8709	48.0975	189.544	182.878	183.283	198.928	196.821	172.839	205.679	158.327	187.908	179.464	199.944	177.663	177.156	164.723	197.097	181.003	192.516	175.761	183.809	177.994	203.43	180.083	168.301	171.766	191.194	170.158	187.462	183.016	184.73	193.353	180.411	190.359	157.895	168.528	189.082	185.909	179.659	199.127	197.594	183.684	195.86	170.838	192.012	168.925
ENSG00000135446_CDK4	43.896	46.1223	48.175	196.256	169.308	188.071	164.505	194.421	187.147	186.126	177.505	174.943	170.071	204.101	170.865	190.38	179.768	185.369	194.933	180.741	185.404	178.062	178.627	193.036	185.599	181.583	164.588	183.957	188.014	193.051	173.691	179.274	208.893	155.168	179.475	160.138	182.591	193.015	171.862	194.271	197.822	191.755	171.005	205.768	186.584	185.021	178.796
ENSG00000167325_RRM1	42.4129	45.9272	48.0292	183.237	157.504	192.396	169.283	152.912	136.743	183.095	198.993	194.021	195.721	177.505	199.143	188.639	189.055	185.496	158.706	182.014	159.028	167.603	191.279	179.955	204.7	179.504	183.29	201.097	157.185	179.81	185.169	167.243	162.764	202.118	196.379	197.5	187.088	167.784	187.539	190.731	210.71	184.128	186.675	170.759	177.218	189.164	178.036
ENSG00000254999_BRK1	44.5293	45.7083	46.662	182.818	182.364	185.166	191.156	172.305	186.637	189.905	177.744	179.902	186.843	175.944	185.562	185.356	209.588	179.922	175.632	173.931	179.885	178.296	173.623	184.218	179.958	182.141	193.769	186.651	190.764	182.849	191.847	174.24	181.862	193.01	180.975	170.25	182.651	178.058	183.273	190.354	184.396	188.745	186.307	169.529	184.855	177.873	185.024
ENSG00000144028_SNRNP200	43.3925	46.2989	48.4704	198.909	168.245	187.089	172.98	190.076	181.099	192.489	202.928	192.849	181.128	159.169	188.568	206.372	156.229	196.786	182.775	180.147	182.313	193.303	183.302	177.474	194.729	175.94	147.549	190.559	158.344	175.342	155.031	194.897	181.169	159.843	189.123	191.021	157.557	194.074	189.429	206.321	203.733	206.568	170.763	194.898	182.556	192.478	166.366
ENSG00000175768_TOMM5	43.8057	45.4804	47.4725	170.743	187.259	161.065	195.983	188.978	163.684	169.663	200.194	167.935	181.832	179.02	180.824	175.146	219.458	184.714	161.325	165.646	176.798	182.011	179.096	179.708	181.208	192.975	188.16	187.556	197.957	184.875	210.423	175.815	183.184	187.502	178.746	193.816	189.663	165.069	182.698	175.454	180.116	170.574	206.444	189.966	191.111	171.646	192.286
ENSG00000122203_KIAA1191	44.0664	45.4127	47.7602	163.106	196.372	174.781	187.118	187.027	165.764	178.203	178.526	187.666	181.063	184.541	180.245	186.403	210.874	174.133	169.81	172.213	188.795	179.051	179.483	191.625	174.837	188.824	206.14	183.382	176.506	189.289	208.138	176.7	165.205	221.722	176.186	178.76	200.792	171.981	182.239	184.66	196.328	180.824	202.712	173.202	200.099	177.863	193.205
ENSG00000183291_SELENOF	43.7682	45.8975	47.8918	178.618	161.52	173.167	168.223	183.023	171.723	175.448	219.629	190.281	205.792	174.948	194.548	186.63	184.158	199.168	167.375	175.554	188.101	187.059	187.379	175.818	191.759	180.1	171.478	189.319	167.256	170.873	202.419	179.39	190.526	182.523	189.99	216.391	179	187.756	210.637	205.167	206.285	199.785	167.423	190.992	175.813	182.694	169.923
ENSG00000198911_SREBF2	44.4628	45.6763	47.4155	170.543	203.452	178.018	208.625	172.051	174.172	191.529	158.05	190.44	177.796	177.478	189.068	200.761	186.912	191.896	185.419	178.358	181.699	184.966	180	183.659	179.309	182.436	172.34	180.173	198.026	177.145	185.25	189.86	179.581	197.399	187.131	166.342	186.325	178.503	184.1	192.426	179.029	192.158	182.974	188.354	175.876	171.622	180.711
ENSG00000138363_ATIC	41.7206	45.9142	49.5706	199.849	155.174	182.533	161.788	166.856	164.49	184.639	219.923	211.887	191.842	166.242	193.701	193.842	156.026	199.526	172.687	191.288	173.987	178.001	181.51	182.674	198.457	182.465	166.962	205.087	160.637	176.023	156.744	190.401	188.786	161.156	199.74	206.776	156.592	205.992	209.162	204.539	197.757	196.81	173.363	195.335	181.834	194.366	161.409
ENSG00000228929_RPS13P2	42.6265	46.4041	49.3775	196.714	160.058	194.836	217.421	190.812	190.528	191.705	195.276	171.617	227.357	191.274	205.75	142.972	172.959	144.479	165.88	195.687	163.12	182.081	182.472	185.717	217.456	147.938	232.088	239.43	185.516	172.429	166.403	185.717	177.683	172.236	197.775	211.174	193.433	202.2	222.876	170.832	172.034	159.037	175.123	170.397	143.619	208.972	146.475
ENSG00000065427_KARS1	42.9529	45.7861	47.7878	189.161	148.631	183.819	189.419	159.699	156.294	178.459	190.617	195.393	200.348	163.461	195.283	188.643	187.828	198.411	157.378	172.203	174.632	160.59	195.578	171.201	191.329	165.445	185.129	202.936	177.813	168.579	171.681	180.863	181.467	181.181	197.545	213.907	175.187	184.525	182.469	189.891	202.674	189.355	162.933	185.47	174.162	193.559	177.213
ENSG00000078668_VDAC3	43.81	45.433	46.3075	181.901	162.911	176.749	173.186	169.215	168.974	183.094	210.043	183.421	183.257	173.924	178.594	185.42	187.835	192.673	158.119	194.156	174.844	186.805	172.806	184.394	175.333	175.222	178.41	177.978	168.535	180.514	184.659	181.853	182.035	192.017	182.767	200.944	170.569	190.4	180.499	178.892	183.588	188.071	181.611	181.151	182.376	186.535	175.294
ENSG00000086598_TMED2	44.0989	45.4456	46.8677	178.13	187.523	187.315	189.196	176.117	155.491	186.064	183.592	181.819	178.016	180.406	181.702	179.127	190.344	193.094	162.061	182.708	178.512	176.228	181.746	190.023	186.112	171.728	184.352	175.415	173.438	187.65	193.652	172.792	172.661	209.446	176.898	186.415	187.01	178.173	176.911	186.491	191.846	188.045	188.641	172.326	181.888	179.424	175.707
ENSG00000139684_ESD	43.0845	45.4414	46.8802	181.844	165.383	187.317	182.022	158.499	137.816	186.166	181.687	177.709	207.46	168.044	199.385	168.827	203.224	186.02	163.4	188.049	168.8	172.57	172.929	183.212	198.339	179.064	204.425	167.399	176.077	183.404	176.442	165.89	180.358	183.476	187.589	194.47	195.827	178.491	181.094	185.757	200.8	182.063	176.676	162.812	183.546	202.652	172.261
ENSG00000168374_ARF4	41.2679	45.2553	47.2804	153.987	191.242	167.486	201.808	183.016	160.485	156.237	185.644	192.157	205.511	181.088	194.408	173.576	192.91	171.7	164.136	163.842	201.761	182.72	156.568	188.536	177.099	184.5	189.317	173.436	176.494	188.234	207.921	153.978	164.753	232.734	179.761	183.732	187.015	166.027	180.955	186.043	180.928	163.806	205.22	163.891	159.796	172.531	186.668
ENSG00000134294_SLC38A2	39.7811	44.8747	53.2966	140.722	201.064	143.958	191.849	242.123	208.532	140.315	196.843	161.276	159.112	235.782	165.16	154.109	194.454	156.601	224.682	140.242	231.902	232.398	159.163	229.973	168.885	214.086	176.896	158.762	210.487	228.147	214.54	154.284	121.324	186.487	159.234	177.938	200.082	160.69	163.522	182.073	163.991	155.426	205.127	162.099	240.373	181.06	224.313
ENSG00000140350_ANP32A	44.0019	45.2693	46.303	182.614	178.87	182.712	165.271	178.397	188.416	175.967	207.974	167.032	168.012	181.305	172.413	187.711	171.523	184.311	178.296	175.689	183.55	178.482	194.411	185.303	174.25	180.096	167.554	177.774	190.179	184.939	183.156	188.044	194.553	176.128	160.54	189.33	170.105	188.512	176.677	178.205	177.789	182.768	180.849	192.318	181.766	184.924	182.32
ENSG00000163597_SNHG16	43.1428	45.5073	48.8106	171.539	209.502	172.721	185.541	191.389	191.601	165.116	172.521	195.269	195.351	226.824	205.856	196.559	163.317	179.128	186.568	198.116	190.341	181.089	161.953	181.955	195.165	182.104	156.954	180.431	173.447	193.475	174.211	180.301	188.11	175.676	200.075	188.608	170.159	141.033	216.833	223.349	201.34	178.023	170.089	158.241	187.554	172.873	155.314
ENSG00000114416_FXR1	40.6398	45.3375	48.3627	187.084	161.312	189.346	170.539	160.814	136.764	182.002	195.717	178.968	197.363	166.299	188.698	182.216	205.173	175.361	144.385	174.576	160.131	147.792	179.352	183.081	190.736	196.771	189.82	195.989	172.027	200.604	175.274	170.689	166.771	205.593	193.697	194.617	192.713	159.175	156.838	180.697	201.855	150.338	194.699	159.429	190.637	148.873	192.485
ENSG00000175130_MARCKSL1	40.7569	45.2701	48.4475	193.599	169.652	190.298	154.503	213.367	197.978	181.294	162.708	162.988	181.247	203.667	170.919	186.534	155.658	187.94	200.673	171.671	212.073	194.347	185.147	218.953	174.823	176.954	144.897	183.775	170.462	224.047	163.147	193.854	209.099	160.888	160.26	150.692	151.227	181.86	167.405	165.333	180.914	198.235	155.82	188.806	182.455	170.639	148.902
ENSG00000232573_RPL3P4	41.7554	45.2243	50.8269	209.707	186.227	197.718	198.213	190.835	207.06	205.009	180.122	169.416	229.402	176.105	197.638	116.892	171.614	132.776	181.673	192.621	143.352	164.4	193.566	165.116	205.28	166.223	253.301	224.244	176.589	144.22	175.073	179.818	173.949	165.421	224.421	219.43	192.508	202.034	216.973	139.804	190.431	163.636	175.691	158.619	170.477	203.732	170.873
ENSG00000100567_PSMA3	43.6132	45.1235	47.8517	183.573	156.864	186.786	161.955	190.582	172.316	177.658	227.903	181.31	193.221	191.535	185.904	174.499	179.032	179.677	165.84	178.965	197.217	171.722	186.503	178.728	192.229	175.459	169.779	207.226	161.093	191.022	177.189	167.108	186.263	189.329	188.26	206.981	167.111	179.415	187.717	196.005	195.155	174.438	175.213	193.002	178.238	203.108	173.412
ENSG00000105887_MTPN	42.3758	45.1035	47.5949	163.24	173.435	185.174	169.567	166.959	147.743	168.092	199.011	200.243	179.978	169.482	190.497	180.154	191.365	175.098	164.84	167.418	164.596	182.856	180.673	183.162	196.236	175.354	182.46	190.029	174.883	182.053	187.463	162.828	144.222	191.26	190.674	198.336	177.422	174.088	193.428	201.904	201.692	182.402	178.535	166.826	183.251	185.372	179.081
ENSG00000137804_NUSAP1	39.0726	44.6376	47.4038	147.218	169.881	195.915	133.52	110.682	123.972	197.342	187.961	194.87	191.557	171.377	197.341	155.011	192.095	183.289	144.497	189.872	163.993	160.895	187.639	176.33	180.7	178.653	204.536	176.285	133.25	183.15	182.675	173.086	135.255	160.127	194.316	204.531	170.213	149.033	187.676	184.965	203.605	178.009	187.324	149.493	188.846	178.448	135.039
ENSG00000109332_UBE2D3	41.9626	44.9266	46.744	160.239	163.563	179.441	193.645	186.864	148.487	185.172	182.695	172.273	179.972	180.772	193.184	188.964	176.2	178.056	149.848	174.215	166.894	153.536	177.364	175.471	190.322	202.692	183.491	202.42	166.147	187.013	175.445	194.982	146.625	180.461	181.486	194.436	173.619	184.684	167.126	198.215	200.439	181.903	167.908	157.182	167.831	177.092	186.35
ENSG00000175203_DCTN2	43.057	44.9355	45.894	171.334	175.803	175.623	184.438	180.539	183.063	170.594	196.512	179.931	174.941	167.778	166.331	189.874	182.449	174.911	164.606	168.484	179.452	180.046	175.507	176.696	180.768	195.006	179.144	170.695	184.126	155.691	175.725	193.268	205.083	169.939	182.759	183.613	185.986	186.028	183.344	180.556	169.36	178.518	162.383	182.755	183.465	179.553	183.621
ENSG00000075239_ACAT1	42.1853	44.7446	46.4144	188.426	156.879	184.358	152.616	177.342	161.502	189.965	196.637	177.136	164.37	188.443	158.981	175.629	190.643	178.384	171.874	172.951	181.36	172.202	167.11	168.881	183.013	185.705	179.572	179.904	166.417	177.668	185.513	168.694	154.858	191.052	181.671	200.292	195.978	161.949	172.014	179.86	167.574	180.545	189.608	180.302	190.195	175.701	181.03
ENSG00000117318_ID3	40.3574	44.7834	49.2244	167.583	182.769	162.208	181.495	217.201	230.576	164.599	143.999	171.885	156.025	223.373	153.067	179.498	197.216	179.19	212.38	173.806	220.538	221.044	161.17	210.786	144.392	179.077	182.384	168.502	210.542	205.695	207.266	156.673	186.395	178.175	159.225	136.398	182.917	171.726	152.848	165.145	159.371	163.674	195.873	191.844	189.526	157.165	195.943
ENSG00000133318_RTN3	42.8833	45.1157	48.4895	175.437	175.318	174.823	167.471	165.388	179.511	179.833	213.924	147.641	190.138	171.987	191.772	207.757	174.091	200.062	181.093	171.382	176.118	183.051	184.634	184.343	196.056	135.337	168.886	178.839	183.924	167.41	169.828	190.764	194.592	170.008	189.42	214.448	173.756	190.485	197.543	200.853	196.678	194.44	123.894	200.987	154.554	192.512	172.307
ENSG00000130770_ATP5IF1	39.7732	44.8391	50.5799	182.194	219.132	176.519	159.022	213.45	215.671	165.839	174.876	124.826	151.131	202.408	135.817	166.451	210.692	168.352	221.199	164.022	187.261	189.194	172.296	189.35	155.625	194.461	187.669	139.468	287.068	205.073	202.592	191.554	185.06	159.307	154.615	153.644	202.053	211.713	153.972	176.275	135.996	168.615	166.783	197.392	192.5	144.382	209.489
ENSG00000086758_HUWE1	41.3351	44.9501	47.5307	169.622	179.334	174.231	164.307	168.241	166.976	172.566	189.825	198.554	165.934	165.404	196.955	206.623	146.384	189.739	193.831	168.286	180.387	186.925	189.616	190.222	183.935	164.18	148.203	180.266	153.154	180.294	156.581	187.599	148.007	163.212	199.821	195.06	154.6	180.637	200.144	228.021	183.596	190.348	159.687	198.876	178.472	176.474	165.319
ENSG00000164754_RAD21	42.3359	44.3468	47.0893	160.323	171.437	171.387	170.509	152.863	158.31	159.429	222.404	186.061	183.379	168.719	179.554	189.099	193.062	180.717	161.234	166.642	164.751	172.922	176.037	168.955	182.57	179.679	178.738	174.262	193.808	171.283	190.527	166.037	159.354	190.946	174.653	200.549	185.981	174.019	179.459	192.071	186.132	174.999	191.116	172.993	185.77	190.619	195.977
ENSG00000125977_EIF2S2	42.3634	44.4769	47.2898	178.571	183.78	181.201	183.925	153.266	163.857	176.292	195.303	182.839	184.129	169.612	177.502	178.314	214.21	176.719	159.16	175.423	156.858	168.878	176.216	163.807	169.401	183.174	196.246	168.419	194.881	179.718	212.305	166.615	190.399	202.017	170.321	196.159	210.722	166.094	172.948	175.555	185.438	176.038	206.617	167.907	183.069	170.736	204.626
ENSG00000147955_SIGMAR1	41.7296	44.9376	46.8991	169.748	168.442	200.451	179.714	186.391	195.883	182.281	166.608	136.323	173.724	184.489	146.737	204.373	173.6	211.83	203.409	158.397	184.095	171.777	181.439	180.223	152.673	206.723	167.849	151.844	217.049	181.709	176.646	181.197	179.311	182.865	173.348	161.477	179.786	216.117	145.832	143.481	165.757	188.81	157.902	187.831	193.874	176.277	186.894
ENSG00000092201_SUPT16H	43.2986	44.4224	45.9047	174.366	156.558	184.489	162.962	161.585	145.684	176.808	202.055	180.462	176.775	167.06	183.762	183.188	185.979	175.763	161.887	181.328	169.559	173.002	187.224	177.062	179.55	173.176	174.408	176.37	165.828	179.585	185.853	173.763	171.203	189.778	176.197	195.824	182.156	180.106	178.456	184.964	184.308	177.028	182.784	173.248	185.634	178.317	179.997
ENSG00000168090_COPS6	42.5869	44.4208	46.3553	180.196	182.839	182.018	170.29	175.085	184.426	187.813	192.829	162.638	170.863	180.769	162.577	188.661	170.569	206.53	177.395	177.972	185.753	170.52	182.53	160.804	179.102	181.013	170.821	166.224	201.265	176.833	176.409	192.42	214.408	164.342	169.089	170.018	180.645	178.952	171.065	169.568	169.136	191.325	175.588	199.055	174.681	168.142	190.747
ENSG00000241685_ARPC1A	42.7117	44.1566	45.8953	171.979	193.024	174.541	200.272	189.891	164.6	177.016	166.732	175.284	176.237	180.384	170.77	183.969	182.419	180.358	177.899	169.981	180.278	193.583	157.402	191.567	184.245	174.198	158.71	170.683	175.979	186.753	189.094	164.528	177.118	205.447	180.77	170.512	178.882	171.075	170.215	180.44	182.193	175.837	189.127	175.822	175.345	176.159	163.941
ENSG00000104889_RNASEH2A	41.5655	44.0658	45.6532	196.669	199.616	183.712	188.57	171.505	177.048	200.948	151.879	169.622	163.943	189.158	168.484	174.339	178.508	175.304	180.918	170.403	183.659	169.827	170.544	165.522	158.464	180.031	177.875	168.567	191.812	178.126	165.383	178.549	190.672	179.173	151.109	155.961	182.647	175.22	149.366	160.617	165.413	181.697	195.613	179.237	175.478	153.3	182.509
ENSG00000163918_RFC4	42.5845	43.978	48.9366	169.779	199.556	171.258	224.614	171.125	156.623	169.714	187.787	186.196	176.622	201.439	175.202	177.908	202.501	174.907	178.929	165.009	173.084	170.095	165.758	173.063	199.646	193.238	204.837	171.066	192.791	174.938	196.583	167.283	180.666	208.962	172.782	191.364	206.507	167.751	186.337	172.97	171.071	161.445	203.942	165.267	184.857	169.43	203.3
ENSG00000074696_HACD3	42.5335	44.2979	46.1478	179.273	168.932	182.962	165.818	174.068	143.009	171.849	194.258	176.736	174.883	169.438	188.784	177.378	180.875	173.542	150.842	169.81	173.209	168.485	185.659	184.345	171.996	174.411	180.158	189.747	169.179	177.372	187.296	167.524	151.323	196.677	181.523	184.673	181.209	177.336	191.9	189.276	188.747	181.719	194.812	165.713	171.105	172.514	177.048
ENSG00000142230_SAE1	42.0125	44.2761	46.2707	193.041	147.776	173.859	151.476	165.56	174.419	188.863	192.461	163.809	167.322	188.014	172.513	190.328	187.57	186.281	179.291	177.847	169.325	181.803	177.391	178.157	180.824	174.245	153.757	158.545	163.186	176.817	165.983	169.781	184.874	185.676	169.343	188.77	168.131	184.442	175.463	179.807	186.943	175.894	165.081	185.153	184.723	184.65	168.023
ENSG00000143252_SDHC	41.7734	44.1951	45.4901	167.527	153.029	182.606	178.469	174.109	170.565	156.255	183.276	166.695	197.804	177.83	182.252	166.949	179.969	168.2	171.681	176.381	173.992	171.297	159.131	191.617	178.218	180.735	187.594	174.604	156.991	177.121	179.073	153.128	181.086	178.243	183.725	177.298	176.44	164.223	185.576	191.599	190.794	176.18	180.675	164.17	182.541	159.356	162.986
ENSG00000244716_-	40.5378	44.9597	49.3262	206.755	166.331	197.828	189.285	161.835	181.055	198.67	190.887	184.029	222.472	166.142	187.338	136.847	186.278	158.006	163.864	197.22	163.95	149.787	182.053	156.284	203.454	145.493	203.728	213.189	172.144	160.936	163.043	178.623	159.927	162.023	194.024	213.825	185.166	200.745	202.105	164.273	190.282	152.154	173.532	170.864	155.72	197.333	162.535
ENSG00000136997_MYC	39.2792	43.9728	48.9563	175.868	159.008	172.656	142.364	287.211	322.418	175.998	177.463	160.592	151.835	262.329	162.391	175.914	152.128	184.702	290.946	178.544	311.588	286.899	169.862	263.643	157.037	257.148	135.318	183.317	167.555	275.092	158.987	191.829	177.755	139.405	156.023	150.192	141.132	179.103	157.354	170.842	172.505	196.129	153.931	194.914	238.87	181.273	154.711
ENSG00000214485_RPL7P1	40.024	43.8771	46.9449	178.555	161.727	176.028	188.218	186.465	169.634	183.678	212.215	179.157	216.744	151.03	174.835	123.58	211.191	135.775	169.959	181.518	138.682	145.435	176.867	150.745	190.15	176.065	228.279	201.362	183.785	159.516	174.854	182.843	169.173	158.37	213.9	218.28	221.296	174.445	193.351	159.552	174.989	144.092	167.965	140.052	164.658	171.477	183.749
ENSG00000225200_-	40.5498	43.7872	49.3528	195.094	163.043	163.317	174.633	180.673	172.537	190.464	195.851	173.969	227.776	144.782	170.088	119.601	195.676	123.501	163.008	204.961	113.876	146.027	181.665	148.769	215.948	167.049	252.725	207.475	198.2	153.669	178.6	173.424	161.368	167.238	214.392	197.881	196.003	198.545	218.925	171.556	175.665	143.697	178.175	161.929	157.112	198.916	182.775
ENSG00000236439_-	39.5225	44.0008	50.2475	174.944	163.994	163.124	186.313	188.408	178.784	185.815	168.222	185.444	203.955	146.741	204.685	135.794	175.276	140.538	165.131	206.072	117.745	150.431	208.198	156.807	231.009	151.095	248.678	237.453	192.095	155.416	157.913	214.785	188.66	140.235	231.026	171.684	181.082	191.528	219.931	171.153	192.057	158.921	171.63	176.73	143.89	214.086	158.622
ENSG00000120265_PCMT1	42.2471	43.754	45.0968	176.217	167.226	172.356	154.833	175.101	170.471	167.707	194.113	172.131	181.923	177.626	163.039	172.606	197.188	174.931	167.494	169.535	183.643	174.229	165.068	183.948	176.175	175.112	165.369	172.314	179.984	168.985	195.569	165.355	175.422	181.367	173.245	189.028	178.332	178.716	177.086	180.521	165.601	172.678	184.838	176.052	168.999	166.129	181.192
ENSG00000090060_PAPOLA	40.8597	43.5995	45.6209	161.367	171.603	174.563	151.025	155.404	145.617	159.79	204.533	185.75	171.315	153.239	175.644	179.55	175.777	172.139	154.055	162.578	171.304	166.455	174.606	166.519	182.641	161.575	174.958	178.145	175.47	165.673	191.434	162.694	138.837	184.822	182.012	189.537	174.911	173.481	182.756	191.426	179.73	173.801	183.055	166.274	174.233	186.97	186.314
ENSG00000100902_PSMA6	40.5356	43.4373	45.3245	176.137	166.287	118.822	158.19	173.033	163.576	161.665	208.174	122.497	177.58	179.842	184.195	184.98	193.197	191.808	174.066	180.991	160.468	181.401	177.63	172.267	189.797	185.47	175.055	190.093	172.321	173.815	178.259	165.738	173.62	138.248	173.683	156.551	186.653	149.512	178.572	184.585	166.529	66.2851	179.566	167.356	164.711	92.1914	158.656
ENSG00000204463_BAG6	41.6941	43.6277	46.8326	172.094	174.64	170.338	174.997	196.191	199.036	182.938	157.568	171.875	160.163	169.548	168.714	194.602	160.521	198.295	184.608	169.71	196.947	185.727	178.25	187.865	172.123	178.05	166.481	178.331	183.579	178.103	164.236	192.647	207.027	160.825	174.382	160.155	163.246	193.179	163.705	183.66	170.892	194.445	150.741	201.631	170.104	165.532	167.663
ENSG00000111639_MRPL51	40.8439	43.3142	45.756	188.783	168.061	177.903	155.208	194.984	187.247	156.086	187.118	151.947	163.327	187.62	141.024	167.749	179.842	172.189	178.799	171.209	183.93	182.061	167.492	183.21	155.359	179.162	162.016	169.135	172.832	188.797	182.576	188.824	192.003	183.173	149.948	174.995	182.333	175.879	161.457	163.696	157.548	173.682	163.522	165.997	167.693	148.998	179.785
ENSG00000159199_ATP5MC1	41.7958	43.466	46.6897	169.238	164.143	173.793	150.826	195.837	185.714	191.205	174.374	171.268	179.058	172.961	173.193	187.107	135.496	177.121	179.603	171.983	178.716	188.617	167.7	202.24	172.735	167.17	142.525	191.762	155.383	193.402	160.741	188.276	219.555	161.319	185.561	166.133	144.201	190.745	173.935	167.223	183.433	177.161	172.113	189.777	173.602	183.69	137.436
ENSG00000167460_TPM4	41.035	43.1559	45.5922	173.061	172.186	178.902	165.946	161.927	155.443	175.55	174.23	171.014	182.781	171.455	170.887	164.953	184.456	179.351	154.912	177.101	153.386	158.166	162.547	153.555	172.113	182.566	189.221	164.61	188.375	174.676	196.464	166.095	168.925	194.422	165.589	182.74	185.251	156.92	163.606	163.484	184.721	176.185	187.203	163.984	176.532	176.742	181.776
ENSG00000123144_TRIR	41.1829	43.4218	46.1258	182.418	197.583	173.285	167.347	163.903	209.139	184.309	165.429	152.703	175.603	182.246	149.21	182.608	152.742	182.138	186.741	184.568	169.186	178.116	186.889	171.597	165.038	161.169	173.723	159.015	215.792	169.971	173.236	194.609	199.577	157.454	161.06	155.864	173.652	204.439	156.635	167.596	170.731	177.562	164.629	213.965	176.705	188.645	176.812
ENSG00000175166_PSMD2	40.5722	43.3062	44.6849	162.084	175.059	173.386	159.5	184.636	181.916	157.959	171.534	164.698	152.178	179.792	152.216	181.688	163.027	182.637	176.135	165.808	191.564	179.079	177.027	175.782	167.118	181.005	160.197	153.296	180.739	179.618	169.373	175.817	176.6	162.928	159.853	156.878	162.903	174.817	163.979	173.064	155.671	174.783	163.179	188.284	177.721	152.611	173.997
ENSG00000111786_SRSF9	38.9169	42.7565	46.0469	182.139	191.458	163.249	148.916	194.872	194.017	157.518	168.634	152.593	147.625	188.258	145.198	159.92	217.354	174.963	175.753	172.806	177.156	188.301	167.048	184.801	145.407	201.997	151.298	173.965	184.723	191.648	178.326	168.91	174.171	176.846	148.266	155.465	164.15	168.193	148.25	156.276	146.138	169.246	165.972	182.583	184.812	145.148	174.567
ENSG00000105401_CDC37	39.0033	43.5892	47.1808	192.197	215.366	183.818	154.729	182.775	212.748	188.843	158.191	140.027	157.513	196.02	148.648	176.921	143.594	172.803	188.364	176.699	188.896	173.723	183.355	163.656	156.689	174.991	163.929	155.788	207.644	176.046	161.269	208.07	216.72	143.24	143.805	138.34	167.107	209.022	142.447	150.955	138.999	182.61	161.859	205.595	175.468	161.631	178.233
ENSG00000135829_DHX9	38.8695	43.4662	45.7308	182.191	132.913	181.591	121.088	155.195	158.173	178.277	223.826	178.578	173.47	156.326	171.941	198.91	137.19	187.528	158.6	174.162	173.861	166.45	180.852	172.067	186.081	157.155	140.048	189.944	140.301	171.749	141.778	176.672	173.869	144.27	173.871	193.285	140.01	193.846	180.693	194.314	178.981	183.167	152.281	196.151	172.708	199.66	140.926
ENSG00000132424_PNISR	35.0623	45.8998	49.7744	196.265	170.112	197.238	164.003	134.696	119.871	202.254	220.786	206.785	200.197	139.289	202.081	198.32	134.543	185.341	127.789	195.692	139.007	138.194	212.38	140.522	206.07	140.158	170.254	197.637	135.57	132.734	153.363	184.638	155.764	173.599	212.351	209.065	154.925	187.188	199.357	196.609	205.774	185.803	191.909	170.607	139.335	182.56	165.343
ENSG00000104960_PTOV1	39.2708	43.0675	48.3221	175.599	215.011	157.244	169.343	192.876	224.219	171.908	143.933	158.672	140.68	199.45	154.076	181.606	162.411	193.426	196.782	172.632	205.055	185.965	173.04	180.309	156.098	178.961	153.719	148.265	196.504	173.111	157.729	206	209.233	151.631	157.03	148.35	170.363	201.047	168.309	156.817	144.062	190.929	171.765	210.856	170.055	170.084	187.143
ENSG00000149547_EI24	41.6393	43.0982	45.0681	177.824	154.168	170.338	158.494	169.334	188.966	180.97	180.959	166.686	180.462	171.691	157.381	183.827	181.629	161.726	164.326	173.704	173.082	166.536	198.026	174.23	169.61	164.939	166.621	188.484	168.362	178.207	171.036	165.295	183.236	179.704	161.206	189.133	171.258	171.703	175.169	176.753	173.273	178.135	175.278	185.397	166.185	170.322	161.257
ENSG00000073578_SDHA	40.2673	42.3171	44.4923	163.252	184.692	160.38	166.822	178.533	177.528	169.365	154.671	149.147	148.956	154.96	153.384	165.929	158.492	156.814	177.26	175.537	178.081	185.038	168.109	185.374	165.949	182.616	164.531	169.172	183.063	165.184	173.529	183.393	174.823	175.105	151.503	173.052	177.93	178.443	157.111	165.755	142.807	168.091	177.982	172.708	163.138	172.208	185.555
ENSG00000100442_FKBP3	41.5792	43.0779	44.8281	171.341	164.303	172.407	153.857	169.515	164.841	177.354	204.704	166.508	179.336	181.261	172.521	183.057	179.431	169.506	159.707	180.222	178.379	169.145	179.241	160.188	162.699	175.837	166.738	183.784	167.169	166.253	173.716	163.44	177.409	167.086	158.475	203.265	181.088	182.644	161.003	171.228	161.802	176.851	169.116	173.414	182.295	178.906	172.217
ENSG00000184752_NDUFA12	40.1028	43.071	44.6359	173.465	163.731	173	149.381	160.373	146	143.627	175.682	163.241	179.182	168.222	153.513	162.845	189.056	172.294	151.57	149.448	156.818	181.549	169.985	175.583	178.998	169.55	169.214	157.305	182.103	173.652	173.141	160.527	182.951	172.274	172.446	184.047	194.713	154.133	161.303	158.859	177.093	186.557	197.047	166.201	186.315	172.529	177.182
ENSG00000168255_POLR2J3	39.1119	43.2124	45.6554	190.588	155.274	170.266	175.886	171.115	161.829	176.774	148.091	181.385	141.916	178.9	172.216	184.39	151.299	175.496	159.969	184.99	164.615	165.467	145.655	173.484	183.034	166.707	175.627	177.567	153.512	153.528	146.894	200.622	192.183	154.582	190.849	164.498	152.604	180.007	169.553	188.955	181.374	192.203	177.15	190.803	155.231	190.351	161.587
ENSG00000249264_EEF1A1P9	37.6796	43.6341	49.7946	190.862	162.211	172.789	196.691	184.505	176.284	168.833	204.872	199.449	255.4	146.743	205.295	110.533	184.378	140.208	160.381	178.451	137.582	139.548	177.506	150.373	230.417	159.067	229.411	233.279	181.362	149.39	160.88	170.455	148.914	155.618	234.407	221.572	198.367	178.319	232.742	171.025	191.007	134.505	151.757	140.988	149.301	209.453	160.853
ENSG00000158864_NDUFS2	39.4074	42.6173	44.4052	157.542	151.934	172.953	179.706	170.284	177.525	134.236	166.571	153.216	178.673	172.526	148.518	176.191	189.036	177.115	181.098	146.33	174.642	182.26	168.832	165.187	170.655	201.252	157.892	146.377	160.596	177.472	174.828	173.915	192.584	176.428	166.825	139.859	186.654	162.476	152.748	146.056	160.556	158.902	187.175	178.202	177.653	163.028	156.065
ENSG00000285043_-	32.0329	42.8896	70.9055	170.63	481.37	545.088	265.958	113.784	143.321	140.36	482.548	74.4757	210.789	189.134	199.58	424.432	147.3	23.2561	142.908	141.826	65.1382	144.853	569.233	172.487	19.5	193.539	189.661	83.8083	548.369	212.078	125.899	217.57	146.043	215.877	110.177	147.247	100.517	567.294	540.741	559.49	134.83	30.091	145.219	74.5453	255.053	491.552	289.51
ENSG00000122705_CLTA	40.5906	42.8007	44.9316	175.73	169.39	185.243	154.228	171.033	190.829	171.887	162.133	154.607	161.319	170.28	153.825	180.207	177.417	175.677	169.898	180.084	181.004	177.902	167.442	163.05	159.729	181.325	166.034	165.44	192.555	171.373	172.324	173.687	196.617	167.513	159.515	163.517	178.653	181.885	156.901	159.562	153.256	182.532	160.381	192.366	167.608	175.239	174.082
ENSG00000089053_ANAPC5	40.6282	42.6878	43.4337	168.874	160.776	173.244	148.481	178.539	166.362	173.383	190.572	173.13	167.085	166.004	171.888	184.079	147.963	173.18	156.65	173.448	172.506	166.205	170.67	171.016	174.845	162.803	156.958	176.528	143.872	178.345	153.609	174.261	173.83	161.414	170.503	170.446	153.053	173.219	179.5	183.205	170.833	173.067	165.165	175.965	162.416	167.876	154.742
ENSG00000004059_ARF5	39.675	42.4103	44.4531	163.856	177.224	170.003	186.93	196.675	166.89	179.432	134.246	159.082	165.327	188.108	148.92	168.735	182.415	182.967	169.279	160.368	176.22	177.807	167.703	170.463	143.635	170.559	157.449	148.586	183.339	180.377	156.422	173.503	192.822	172.051	143.053	142.482	160.281	165.333	158.573	146.262	173.075	174.111	177.814	180.443	160.609	146.16	172.545
ENSG00000183010_PYCR1	35.9994	42.3725	45.6917	167.027	210.698	179.633	176.922	191.846	190.902	163.994	139.291	138.612	147.379	164.695	127.796	195.143	170.204	168.374	179.666	144.958	162.282	183.144	166.12	169.472	138.16	191.781	152.197	126.042	252.2	177.903	190.635	175.952	174.475	159.694	136.279	143.678	200.235	181.634	143.533	137.966	130.301	169.508	181.561	183.963	180.523	132.182	185.165
ENSG00000067704_IARS2	40.8266	42.3987	44.2532	163.232	153.89	173.832	153.299	166.777	148.913	162.781	196.576	179.734	177.685	166.579	178.936	174.996	177.768	166.499	162.451	170.166	171.614	167.431	173.485	177.822	174.763	169.407	158.76	178.034	157.396	170.832	165.115	161.712	156.716	178.879	174.839	189.476	169.019	164.255	171.686	179.253	179.604	169.622	169.567	163.529	172.311	167.88	161.921
ENSG00000146963_LUC7L2	40.4513	42.4936	43.4316	169.858	166.325	172.514	158.146	163.173	147.789	175.85	187.396	168.233	171.065	174.023	157.067	179.579	139.895	180.586	149.937	181.772	163.873	160.795	176.219	172.223	161.367	182.852	172.399	164.355	145.794	167.316	155.563	168.732	163.12	172.836	177.132	170.766	161.27	171.311	170.09	177.096	165.73	172.095	166.707	172.132	180.273	151.473	171.658
ENSG00000239672_NME1	38.8452	42.3049	45.0265	170.302	142.166	162.455	122.647	199.43	176.798	152.809	181.209	159.539	182.429	175.572	151.464	186.245	164.236	181.759	182.373	150.27	174.336	168.137	159.58	183.418	172.809	188.936	150.379	173.145	140.826	173.651	160.965	176.237	189.135	153.381	163.387	162.279	166.115	184.161	152.191	162.77	170.619	172.549	121.495	174.23	182.735	154.208	158.897
ENSG00000233276_GPX1	40.9459	42.2675	47.0358	202.022	164.55	191.035	155.81	193.534	173.814	196.697	145.267	169.016	173.898	170.246	172.086	184.137	164.111	189.141	168.227	194.256	188.217	173.59	179.668	175.751	159.574	156.017	164.937	169.124	181.254	166.131	167.421	198.159	220.749	155.901	163.985	136.005	167.686	187.922	162.092	169.013	163.716	201.663	162.271	227.248	162.042	166.565	156.306
ENSG00000089280_FUS	37.5467	42.2427	46.5605	146.994	189.872	154.221	160.959	206.919	196.158	145.1	159.877	162.858	154.216	210.474	140.094	176.949	127.274	183.523	210.179	151.826	195.385	196.225	169.152	196.544	151.672	183.204	139.777	186.68	151.389	184.929	135.146	181.211	176.47	131.863	179.097	151.484	137.02	171.158	158.247	216.449	171.672	168.789	145.536	184.385	194.293	149.786	146.735
ENSG00000143543_JTB	38.8145	41.7172	45.1716	149.973	182.21	163.682	182.208	180.798	189.499	162.035	151.847	153.734	170.78	160.682	141.592	141.331	194.167	153.757	181.183	161.342	186.132	170.537	147.428	169.974	154.998	183.781	169.831	147.086	217.205	163.471	180.351	172.368	185.218	177.189	163.475	162.697	178.616	156.039	165.804	164.575	154.375	167.934	170.763	179.833	164.848	152.765	189.563
ENSG00000124422_USP22	40.9711	42.2243	43.3333	154.613	167.714	157.001	171.839	174.85	159.356	165.556	166.96	172.479	160.657	163.86	174.073	185.772	164.677	176.043	176.583	160.889	173.356	173.024	169.128	181.884	169.697	169.903	158.284	163.957	168.152	173.264	167.439	171.613	167.601	170.741	169.366	164.856	163.481	159.851	178.635	192.026	167.879	174.663	169.929	176.279	168.666	163.314	160.167
ENSG00000063244_U2AF2	35.0411	42.2048	45.9526	176.695	184.182	168.247	137.282	194.884	204.036	183.393	141.351	138.154	131.527	176.702	139.866	183.844	128.554	177.538	198.532	181.824	197.268	182.702	180.118	171.141	163.916	162.461	128.075	169.391	176.023	195.252	138.112	192.067	188.43	129.427	150.015	130.23	152.606	183.71	141.059	159.338	152.792	184.087	135.821	201.671	161.088	151.663	138.5
ENSG00000101210_EEF1A2	37.2711	42.0733	46.205	172.836	236.01	159.407	161.198	178.149	217.724	170.763	135.114	141.187	132.129	187.469	148.095	181.696	176.663	167.497	187.458	156.548	175.317	180.982	169.09	158.507	135.725	166.577	160.552	137.883	241.514	170.862	177.141	198.268	199.155	161.614	137.486	141.464	185.869	178.524	142.672	152.053	139.82	185.861	157.928	208.604	154.217	138.451	193.945
ENSG00000215492_HNRNPA1P7	38.8884	42.7857	46.7064	183.132	155.112	185.953	164.182	163.754	169.931	190.059	200.652	175.277	207.697	155.169	187.116	138.459	174.792	153.247	152.484	183.931	136.84	158.756	194.237	156.734	192.814	172.354	195.607	207.968	157.741	156.706	151.054	175.414	159.396	153.376	195.144	228.765	184.029	172.768	189.892	148.086	184.766	160.477	152.827	140.731	166.519	172.678	167.9
ENSG00000075785_RAB7A	40.2709	41.9947	42.9431	158.653	149.384	166.16	165.315	163.568	160.956	168.035	170.92	153.872	167.963	142.687	157.249	185.517	148.708	179.955	163.262	164.233	171.27	170.348	173.559	180.034	177.583	148.963	154.086	172.29	166.862	165.657	169.168	162.985	171.94	170.27	169.437	169.494	165.288	179.116	167.995	161.466	159.738	179.436	168.089	155.414	173.825	178.091	169.552
ENSG00000130826_DKC1	41.0337	41.9921	43.6053	164.965	178.432	164.011	164.96	155.533	146.755	159.616	182.1	173.474	179.083	165.871	174.441	163.971	172.627	164.861	160.247	169.249	164.506	167.776	166.2	168.153	169.165	167.983	184.393	163.641	169.319	169.54	174.905	163.662	160.249	194.166	170.534	182.404	184.578	161.678	168.386	179.437	163.482	165.586	174.362	167.954	165.317	167.223	178.71
ENSG00000143222_UFC1	41.0751	41.9379	43.3086	177.532	174.572	171.169	182.937	169.116	152.521	168.125	167.752	165.506	169.343	166.101	162.176	167.595	183.313	151.643	167.751	172.764	166.953	155.818	166.088	167.246	152.205	173.063	174.423	162.974	162.752	167.897	189.965	171.811	180.315	184.299	152.443	165.05	181.235	165.852	164.621	157.295	162.512	167.158	172.12	164.194	173.292	170.374	180.876
ENSG00000135821_GLUL	39.2286	41.666	43.8557	162.616	154.639	191.518	151.463	182.493	159.193	175.515	144.843	168.146	151.962	180.959	173.604	165.714	161.227	160.004	167.614	175.145	172.59	170.959	146.8	192.656	164.52	186.488	175.857	157.982	163.575	202.649	155.074	171.806	159.674	205.868	160.687	168.682	156.558	181.366	167.987	193.288	168.404	161.479	155.81	151.597	174.524	150.182	149.139
ENSG00000226360_RPL10AP6	38.358	42.08	46.3489	176.596	148.094	185.198	185.14	195.173	180.294	173.665	180.647	179.609	205.745	148.593	191.687	109.96	166.109	135.338	161.977	185.461	138.196	147.144	183.288	147.843	211.094	155.379	197.861	208.265	167.943	166.527	141.947	174.422	154.959	151.318	209.415	206.673	189.964	168.697	194.473	159.888	163.5	152.946	158.035	150.389	154.889	183.176	167.246
ENSG00000074071_MRPS34	32.9568	41.6182	46.3804	163.28	239.503	158.401	165.977	193.662	219.595	160.452	121.25	123.296	114.905	178.927	132.862	157.375	178.261	156.713	202.183	145.338	192.89	182.78	152.235	167.573	126.414	182.163	165.234	131.482	252.056	176.695	196.163	185.067	196.406	166.969	124.196	122.851	199.638	167.412	126.259	124.916	124.724	183.398	162.706	180.632	185.673	120.724	203.007
ENSG00000131462_TUBG1	39.8502	41.7959	44.7047	170.567	189.446	161.159	180.38	171.581	161.386	157.422	138.965	160.429	145.014	159.559	148.656	176.759	164.428	153.583	168.86	170.356	184.298	166.681	159.836	167.686	159.348	172.45	178.265	151.258	183.69	162.853	191.463	165.126	171.713	179.004	157.004	137.617	179.558	173.48	151.082	165.355	169.18	181.937	185.95	184.124	162.304	140.034	188.24
ENSG00000161249_DMKN	40.5114	41.7149	43.7493	194.156	180.373	171.74	166.58	173.877	163.891	176.019	150.684	160.161	159.918	161.056	157.857	178.343	156.58	167.082	165.837	170.881	173.156	166.701	175.207	164.424	156.642	166.498	164.089	156.013	183.9	167.018	159.937	183.87	191.351	174.368	181.557	161.698	163.088	170.026	160.306	166.087	170.39	184.634	171.075	189.368	164.958	165.364	170.681
ENSG00000100138_SNU13	40.5723	41.8084	43.4634	187.343	161.026	169.089	164.949	173.886	153.564	178.066	163.244	163.273	164.091	167.462	169.181	162.563	161.562	177.423	153.034	176.528	168.942	166.298	164.837	180.23	167.904	158.98	172.111	177.007	153.843	167.197	167.27	166.691	171.945	169.435	162.198	177.994	148.917	168.218	173.757	164.417	178.018	165.26	154.908	177.204	154.341	174.155	148.851
ENSG00000100823_APEX1	38.9124	41.6281	45.8982	186.862	154.739	199.002	154.991	165.4	185.983	184.812	166.181	166.763	162.479	166.262	154.468	173.78	143.159	187.128	170.592	175.372	174.464	179.934	190.348	164.634	173.782	168.478	149.884	175.384	156.917	172.747	145.04	193.957	188.271	150.723	158.337	173.9	145.591	198.773	157.316	158.336	155.227	192.655	140.558	188.946	164.433	165.241	153.432
ENSG00000162772_ATF3	32.7497	41.1487	47.0411	117.786	199.114	123.972	233.04	177.581	158.747	137.718	108.728	165.534	157.945	174.98	203.045	125.649	253.482	119.941	180.197	142.986	178.53	170.19	131.009	167.244	151.213	239.59	202.027	125.793	186.758	162.35	238.922	131.684	130.996	223.58	169.603	137.155	188.633	98.1138	167.723	143.829	169.21	122.293	197.041	112.396	163.656	114.513	218.441
ENSG00000126261_UBA2	39.5761	41.3197	43.283	162.693	158.258	169.023	158.443	145.031	138.11	173.257	198.372	174.834	171.263	157.767	167.61	172.751	182.533	162.561	147.108	158.563	155.126	151.515	186.637	164.004	166.609	159.34	190.866	163.371	159.237	157.228	191.763	162.995	154.671	195.2	172.758	200.923	176.647	152.624	164.526	168.36	184.635	166.711	166.031	155.466	160.3	166.473	168.677
ENSG00000278771_RN7SL3	33.1766	41.9678	61.8214	164.374	468.134	162.455	389.296	325.763	1128.3	135.906	159.371	172.61	167.852	282.829	140.883	111.116	167.89	115.573	864.822	186.432	301.559	293.886	181.05	193.967	216.955	257.396	163.006	151.477	93.7157	206.731	123.182	193.947	127.738	117.751	215.42	171.485	269.04	110.784	193.375	151.997	126.433	132.582	111.605	152.526	261.727	133.078	103.98
ENSG00000169813_HNRNPF	38.2076	41.4034	42.9478	184.262	151.359	178.281	140.523	174.419	166.233	163.55	176.444	149.266	136.766	169.358	140.322	167.526	177.012	166.213	168.591	158.587	182.669	163.756	157.704	165.516	143.196	171.182	146.13	171.994	168.352	167.853	164.537	165.711	160.996	163.418	163.409	152.077	176.345	176.857	145.717	160.855	151.82	186.352	155.09	169.493	176.516	147.912	167.478
ENSG00000204525_HLA-C	36.7659	41.0154	44.3275	169.037	205.304	152.084	169.112	194.602	204.997	154.118	143.354	132.247	145.127	182.469	145.209	161.408	186.072	161.691	186.123	156.661	177.317	174.116	155.471	163.432	147.02	178.726	158.562	142.643	224.099	166.433	171.51	171.74	180.969	154.789	138.914	140.538	173.443	164.036	142.374	139.14	142.146	170.259	164.088	182.596	177.288	147.195	174.917
ENSG00000136240_KDELR2	39.1335	40.9832	44.4713	146.772	185.634	154.774	199.699	158.535	147.605	156.928	169.78	177.257	162.307	165.253	183.593	165.546	185.856	162.663	152.387	152.589	162.088	160.778	159.057	167.023	177.028	161.822	181.352	154.794	175.814	158.821	189.032	149.998	153.316	201.071	173.645	161.22	180.159	145.603	178.095	183.221	172.861	165.202	189.209	152.888	156.403	162.257	173.452
ENSG00000170043_TRAPPC1	39.2495	41.3682	43.4293	165.15	152.581	166.716	164.61	196.121	169.946	165.276	162.571	155.503	173.909	171.284	165.158	184.686	151.279	179.696	148.852	173.143	171.735	187.617	162.858	175.101	183.616	147.401	143.103	185.238	153.727	163.93	156.618	169.235	193.836	157.382	169.247	149.945	146.65	169.973	175.14	156.87	166.199	165.669	159.313	187.978	159.322	173.128	164.417
ENSG00000189403_HMGB1	38.431	41.0963	44.8372	167.683	144.414	165.888	153.885	175.9	151.084	174.4	183.749	149.527	164.414	199.972	154.819	157.204	155.788	182.869	184.59	168.876	180.211	211.224	154.289	182.698	160.707	197.068	164.356	167.711	142.942	191.57	153.67	145.083	156.116	170.096	146.733	176.762	151.31	167.597	143.655	157.077	150.834	181.492	165.153	148.741	200.953	154.247	162.185
ENSG00000240409_MTATP8P1	37.0404	43.0902	49.6752	194.336	140.727	202.105	149.039	152.229	189.621	177.446	187.583	178.185	203.969	159.502	172.303	125.415	152.252	140.281	154.752	184.911	142.278	160.788	267.41	148.289	217.995	143.901	181.688	229.223	172.418	129.799	131.876	204.713	143.608	121.434	212.956	198.171	201.594	315.317	187.276	167.883	198.878	159.413	148.119	174.483	143.82	223.47	161.615
ENSG00000105185_PDCD5	38.3221	40.9991	42.7353	146.914	165.587	165.237	165.319	145.689	132.183	171.331	163.759	138.361	155.197	171.009	155.002	165.957	191.904	158.322	158.78	162.072	144.655	169.769	170.194	149.394	159.624	180.377	182.637	164.234	172.103	180.131	173.471	148.654	171.002	169.536	152.717	170.76	177.189	163.73	144.569	156.473	142.755	167.42	168.74	160.483	163.44	145.199	178.146
ENSG00000106211_HSPB1	36.4514	40.6256	44.835	130.782	189.393	146.635	206.163	218.972	222.165	152.908	128.444	140.583	145.039	186.101	141.521	148.548	177.381	151.377	191.402	126.385	204.476	181.918	128.536	192.308	145.529	162.703	172.401	146.663	174.273	174.621	179.993	159.197	176.684	170.426	150.612	124.761	171.862	153.428	152.102	149.56	138.639	144.29	181.25	163.702	165.855	162.302	165.756
ENSG00000105404_RABAC1	37.4268	41.1678	43.3215	160.738	184.271	155.657	181.935	188.073	187.385	149.007	132.688	144.213	150.9	169.681	147.769	158.845	173.779	159.291	184.511	163.921	172.193	173.429	149.01	170.279	145.639	168.891	165.392	146.413	196.448	176.557	171.314	172.401	179.632	167.811	157.315	128.722	162.248	165.164	153.106	172.858	131.917	149.31	165.474	183.139	157.521	138.387	164.178
ENSG00000124785_NRN1	38.58	40.8795	43.3043	170.429	148.338	182.331	162.221	185.13	151.772	177.266	171.498	169.307	163.337	158.01	179.298	156.861	172.069	141.172	144.058	165.308	199.273	166.668	163.7	161.649	150.484	176.756	149.257	181.033	160.591	162.323	182.841	153.339	155.376	173.506	168.733	155.937	176.017	167.875	157.038	153.968	172.35	149.514	176.413	159.797	143.149	147.888	165.754
ENSG00000106803_SEC61B	38.8454	41.029	43.3217	171.674	151.458	156.175	153.929	184.253	152.18	144.701	155.069	162.205	173.287	170.858	175.635	140.175	189.057	172.482	172.177	169.133	155.117	157.557	146.083	179.105	166.779	174.946	173.286	166.731	160.042	174.626	188.216	151.636	174.272	183.853	165.564	158.615	154.622	163.408	157.914	162.502	156.558	150.663	164.824	162.834	179.745	157.163	167.368
ENSG00000134590_RTL8C	39.4062	40.5967	42.9664	177.23	171.056	160.859	191.213	182.505	161.939	166.068	126.987	162.834	155.004	174.317	161.145	166.236	157.615	171.514	158.153	171.223	167.511	171.051	159.825	175.557	154.21	171.983	153.915	174.333	155.076	174.806	159.194	167.488	179.157	172.306	157.654	129.178	155.783	159.906	153.668	154.747	158.494	175.604	167.702	169.539	158.222	158.271	142.951
ENSG00000214223_HNRNPA1P10	37.5693	40.8067	44.7663	176.973	162.598	177.421	160.938	170.89	162.502	189.785	188.03	170.894	191.443	155.281	176.912	125.716	173.322	146.15	151.069	179.077	143.011	150.013	179.03	148.429	186.691	156.003	193.245	204.394	154.93	163.856	138.618	166.461	147.618	141.732	194.503	210.026	182.857	170.755	193.721	152.571	164.565	148.647	142.726	148.75	158.351	160.623	159.603
ENSG00000100813_ACIN1	38.764	41.058	43.0766	173.93	172.657	165.419	158.339	163.74	161.831	169.667	177.934	166.194	153.715	157.695	156.103	179.092	133.349	166.934	163.67	173.237	163.27	165.07	172.747	150.439	163.916	153.757	145.424	177.043	154.707	157.265	148.32	180.123	171.253	151.931	169.431	167.582	142.658	184.569	169.736	175.05	162.842	170.36	152.12	185.039	161.89	164.548	154.642
ENSG00000116478_HDAC1	39.2444	40.8719	41.9641	158.261	144.687	163.787	156.698	170.858	155.368	156.232	188.585	161.756	164.596	157.818	155.806	171.337	160.113	164.433	154.82	162.698	160.041	160.882	163.539	165.786	155.151	163.202	160.167	167.857	153.568	173.836	172.702	164.56	167.695	161.86	155.611	169.669	152.932	171.955	154.901	166.823	167.854	172.788	165.181	178.879	163.436	171.874	164.036
ENSG00000124193_SRSF6	35.7621	40.7114	43.6299	128.379	158.912	165.816	174.806	251.233	179.066	128.498	166.532	158.088	164.348	175.59	119.041	162.082	128.031	149.695	173.662	166.152	210.265	189.607	144.422	179.26	163.833	172.45	162.2	134.95	161.055	201.368	142.591	160.001	163.215	128.97	162.476	139.348	162.225	180.394	175.638	138.996	127.144	168.314	138.187	166.693	180.925	157.279	170.225
ENSG00000137876_RSL24D1	37.9864	40.8718	42.2811	151.821	152.102	168.322	169.231	128.299	127.924	164.181	198.936	172.017	190.509	158.557	179.158	151.894	181.264	168.024	148.595	170.64	131.33	145.941	160.013	145.906	167.299	157.19	168.805	162.542	165.767	151.71	174.144	147.025	154.971	156.54	167.284	207.802	153.694	159.527	166.512	162.885	181.064	161.239	165.926	143.53	164.089	164.913	175.984
ENSG00000141698_NT5C3B	39.1103	40.8512	43.7037	162.327	163.661	164.542	145.38	150.985	181.305	181.165	164.638	166.261	145.767	163.148	152.943	178.439	177.474	173.069	157.458	167.371	162.411	161.596	167.755	161.656	152.88	167.044	148.661	156.392	180.858	155.784	177.447	158.43	179.711	168.454	152.326	155.301	158.604	171.032	157.572	166.685	141.09	175.397	157.092	183.201	156.59	179.451	184.842
ENSG00000140525_FANCI	38.108	40.742	43.1153	156.226	162.042	162.136	179.96	142.825	121.459	162.529	174.765	171.156	169.11	158.448	175.703	163.093	174.656	151.556	144.435	162.843	144.052	149.172	176.102	152.202	165.554	155.689	167.968	165.076	153.123	170.773	164.593	154.523	136.85	193.934	174.333	179.944	173.199	150.194	166.022	171.916	172.643	149.626	167.851	151.436	157.303	156.42	178.623
ENSG00000239559_RPL37P2	37.6871	40.6877	44.6881	178.789	136.383	184.678	161.332	138.758	161.908	193.045	178.642	163.593	188.803	132.676	172.174	126.151	149.159	158.762	128.079	195.831	146.034	122.083	187.112	127.892	189.786	153.203	221.111	187.416	157.767	154.9	123.867	165.206	156.247	154.493	179.791	177.745	172.055	165.743	171.547	157.812	166.418	150.086	163.676	172.418	152.736	182.943	153.895
ENSG00000155660_PDIA4	36.6188	40.4571	43.3438	146.971	190.5	146.583	177.394	175.327	152.386	143.86	134.085	142.083	145.843	168.614	146.75	164.278	162.857	162.32	165.334	145.419	179.177	174.302	152.629	180.972	138.251	175.008	165.562	126.125	177.341	177.881	174.263	164.25	164.682	186.967	146.503	142.325	170.713	143.967	146.466	152.223	147.206	159.839	170.627	157.956	161.337	132.524	162.483
ENSG00000107581_EIF3A	39.1345	40.8854	42.2396	166.598	162.115	164.423	141.249	140.422	148.377	166.315	194.029	162.139	159.45	148.488	162.66	174.562	161.599	166.314	158.393	167.731	142.13	148.767	176.324	144.17	165.231	157.683	147.064	162.621	178.122	150.207	159.445	169.368	158.139	156.156	166.078	189.825	171.832	172.222	165.321	173.625	165.569	175.285	153.421	158.08	166.471	166.221	170.913
ENSG00000107438_PDLIM1	38.7861	40.6695	42.6011	171.933	152.127	168.769	166.276	162.536	145.982	177.494	155.097	179.83	186.275	156.307	174.184	173.213	151.683	165.23	159.431	159.41	150.823	162.598	167.678	171.723	170.95	156.06	147.364	166.948	144.009	164.463	146.74	155.581	174.059	159.591	173.793	165.032	146.403	151.02	166.159	162.758	182.348	167.355	158.293	160.335	155.285	168.716	144.776
ENSG00000165678_GHITM	38.9065	40.6223	41.8153	164.511	145.882	160.85	155.833	150.109	135.735	164.903	178.405	159.224	172.406	151.113	167.277	151.287	182.884	167.215	151.538	160.623	158.631	156.525	153.666	166.856	163.582	169.284	164.475	160.283	157.56	166.778	168.912	145.245	155.557	170.535	160.106	177.658	164.835	153.544	163.201	170.853	165.456	168.743	162.814	152.248	170.236	162.164	158.284
ENSG00000205339_IPO7	37.32	40.5017	43.8152	161.007	147.548	167.876	148.379	135.183	120.311	161.774	192.166	183.22	176.254	140.429	183.5	163.442	166.55	156.874	138.435	151.904	145.202	143.818	168.742	152.51	174.204	149.997	159.49	175.77	159.697	144.849	175.327	149.041	122.056	175.529	175.062	188.516	165.625	160.052	179.124	189.137	180.306	162.24	164.357	150.379	157.354	173.02	163.951
ENSG00000070087_PFN2	37.4611	40.5466	41.9248	167.1	137.391	171.909	149.24	164.376	129.043	158.871	166.06	167.794	145.14	182.669	151.881	185.584	164.015	187.957	146.015	167.023	153.363	160.999	166.421	180.724	161.464	167.415	147.825	179.809	148.557	163.18	151.658	165.005	159.494	183.69	179.356	158.224	153.754	138.402	148.494	177.57	162.909	166.99	153.9	135.058	159.318	141.504	173.721
ENSG00000100941_PNN	38.1677	40.1678	43.7715	180.596	180.36	187.285	146.849	152.661	143.128	192.431	177.85	161.87	160.881	167.24	160.461	175.456	129.154	172.875	153.152	185.511	146.946	153.791	181.882	144.646	154.346	160.303	158.916	155.842	143.986	158.023	151.59	181.846	171.963	164.937	157.115	169.626	158.851	187.25	151.276	150.366	152.698	179.205	164.833	173.976	166.792	147.686	161.844
ENSG00000067064_IDI1	36.5	39.7379	42.9399	152.53	148.934	166.515	172.804	176.429	124.97	163.097	155.784	158.451	175.616	167.908	192.822	143.253	178.435	135.522	150.028	152.229	161.775	147.163	139.732	170.936	152.788	194.472	196.105	159.452	136.128	170.675	170.71	135.517	142.967	212.705	172.034	161.563	163.938	113.981	160.985	149.422	177.58	152.735	208.49	105.437	145.612	129.062	149.813
ENSG00000111642_CHD4	38.0269	40.3133	42.1279	161.766	159.153	152.182	157.071	170.139	177.689	159.837	186.304	159.084	152.083	153.137	147.156	169.309	146.287	168.842	173.726	158.908	162.932	170.304	166.391	158.906	149.67	163.126	129.294	149.754	164.367	166.412	148.535	192.055	167.52	146.609	156.109	174.551	149.713	162.042	162.417	161.31	149.844	181.964	150.608	173.304	166.988	161.196	157.131
ENSG00000099956_SMARCB1	36.9052	39.9186	43.2019	117.398	179.511	108.482	166.864	149.355	182.935	110.751	158.985	152.313	114.794	167.879	112.968	187.053	161.92	172.644	172.862	160.703	160.069	165.629	170.548	168.796	141.114	151.854	151.239	156.478	180.878	159.279	164.653	189.216	184.364	147.043	138.732	158.684	155.149	178.859	155.216	154.72	138.534	130.844	100.512	189.583	161.461	175.578	176.9
ENSG00000178719_GRINA	37.6832	40.0911	42.041	174.392	166.933	156.258	159.49	163.354	163.872	160.705	136.805	156.703	154.395	161.691	155.759	173.537	134	170.185	157.472	172.135	167.035	166.189	158.605	173.744	166.625	152.308	147.736	168.297	143.274	150.208	146.578	164.053	193.328	148.799	172.267	144.635	130.598	160.024	158.464	167.765	174.995	186.01	158.41	179.978	145.24	167.542	132.687
ENSG00000170540_ARL6IP1	38.4992	40.0396	40.8832	160.464	140.006	163.194	150.571	154.06	144.293	158.286	173.168	155.063	162.527	162.436	160.202	156.2	161.114	163.314	138.646	163.757	165.152	163.793	154.18	174.776	162.788	163.606	146.496	162.841	146.285	171.738	159.593	144.659	152.76	160.115	153.464	173.187	154.344	154.459	149.284	163.221	165.379	171.623	156.382	153.976	164.364	155.842	160.827
ENSG00000143774_GUK1	34.6628	39.7663	41.5479	178.798	180.762	157.378	158.259	165.534	186.192	165.747	128.96	135.679	129.509	192.909	128.137	162.031	159.872	137.977	181.144	171.899	166.318	174.961	152.928	152.162	140.952	165.005	154.202	126.398	209.562	163.292	152.739	162.578	193.058	148.316	126.513	128.331	157.031	169.446	123.257	140.674	135.095	162.93	154.429	165.812	160.654	125.355	164.6
ENSG00000113649_TCERG1	36.808	40.7799	44.6826	172.41	149.61	175.354	129.772	142.764	115.914	177.987	181.817	198.236	170.461	148.432	185.099	169.484	123.208	156.197	149.914	169.585	150.637	142.848	203.094	157.982	188.201	174.139	142.276	189.154	119.638	151.579	146.832	161.287	135.5	172.661	182.522	178.978	143.094	164.953	177.453	185.153	191.962	167.354	151.679	151.973	156.035	180.729	136.614
ENSG00000055044_NOP58	37.3601	40.2184	42.1914	175.893	127.568	172.662	134.617	161.819	127.842	170.01	210.682	167.796	166.68	157.76	155.372	161.649	142.097	168.581	136.959	158.614	150.066	143.571	170.207	157.324	159.774	160.098	149.232	176.191	122.857	162.552	145.525	163.993	151.095	154.165	171.482	190.132	138.855	168.827	166.824	171.759	172.591	162.551	151.485	156.455	162.024	166.753	147.197
ENSG00000147889_CDKN2A	36.0966	39.9674	43.9557	170.823	207.76	162.545	136.922	174.614	199.623	172.764	139.368	140.08	141.548	184.384	142.547	153.637	156.288	166.021	177.405	169.864	172.086	165.893	158.142	168.895	124.146	161.596	153.035	151.873	244.943	156.709	156.269	184.164	189.139	137.02	148.111	125.086	167.685	183.282	137.867	143.145	135.7	176.226	152.398	180.75	156.248	155.525	176.389
ENSG00000086061_DNAJA1	36.7377	39.836	41.6338	143.505	142.589	146.044	130.794	160.075	166.005	137.875	192.107	147.125	147.455	166.712	133.342	163.555	173.1	162.447	155.491	140.108	171.614	173.656	151.766	160.547	139.856	178.952	148.488	147.935	165.352	170.577	162.186	151.561	154.134	151.603	140.859	165.929	170.77	164.571	146.893	158.355	143.97	159.08	159.608	166.763	174.893	162.87	183.904
ENSG00000132485_ZRANB2	36.0796	40.3465	44.3258	179.844	145.029	178.965	140.649	139.877	115.33	177.211	202.593	182.849	170.872	139.447	188.333	170.219	137.096	167.315	122.389	176.054	142.433	143.048	174.805	144.286	186.697	144.475	160.833	192.181	123.227	144.6	158.805	156.041	144.417	161.939	177.334	189.982	141.953	173.644	166.479	178.35	184.69	166.07	154.822	151.397	145.161	167.189	149.809
ENSG00000111897_SERINC1	38.0293	39.7807	42.7826	146.228	152.974	159.594	148.847	154.397	133.429	152.362	183.659	169.089	163.715	156.584	173.953	149.361	173.516	153.93	139.142	152.124	152.115	151.862	150.613	159.234	160.498	158.101	168.802	166.589	166.008	153.436	175.486	139.358	131.579	178.308	170.042	180.017	171.493	161.178	168.317	173.13	177.42	153.813	172.128	143.089	154.171	159.012	173.265
ENSG00000164466_SFXN1	38.656	39.7833	41.9359	169.411	156.565	169.061	159.384	156.593	131.022	157.691	168.093	170.556	164.527	158.486	172.211	155.39	157.804	153.48	145.605	157.911	153.425	154.134	159.348	163.667	169.456	155.166	162.903	172.364	138.477	162.632	165.296	150.851	140.978	179.234	170.567	164.117	155.383	144.731	166.695	174.891	172.047	159.588	162.684	155.219	158.919	154.443	151.116
ENSG00000148834_GSTO1	37.9849	39.5587	41.5218	167.274	138.169	156.375	175.603	153.076	136.319	141.697	151.188	160.303	172.166	165.532	154.779	143.788	182.981	143.188	153.59	161.705	153.791	151.208	148.277	166.272	158.872	168.664	164.363	163.756	152.024	162.068	174.62	142.28	168.725	185.339	154.309	170.645	165.34	144.492	164.066	157.598	153.984	152.176	171.052	151.911	161.091	154.87	159.49
ENSG00000213178_RPL22P1	36.3653	39.6961	43.3889	174.092	146.039	154.086	160.424	157.229	142.812	163.9	193.676	152.15	183.983	148.378	171.948	136.662	199.578	143.014	130.004	160.34	130.977	132.363	151.582	145.269	165.379	177.647	214.07	164.342	170.175	149.405	188.392	153.184	169.291	163.31	162.14	199.194	188.875	153.713	151.969	134.052	144.236	143.824	163.532	135.249	178.507	149.962	174.317
ENSG00000224094_RPS24P8	34.5346	39.8498	42.5348	174.976	126.801	160.432	159.447	154.406	136.422	170.397	163.075	169.365	204.611	138.369	159.351	108.564	176.466	127.654	136.724	160.534	111.484	114.277	180.047	120.998	182.432	155.746	212.728	187.598	148.949	146.813	145.164	159.596	142.807	159.607	177.315	204.115	167.465	167.632	163.842	136.135	152.611	138.062	158.201	124.266	144.407	181.314	162.614
ENSG00000102898_NUTF2	37.8802	39.5704	41.6897	160.474	149.013	142.09	201.996	167.34	149.217	159.057	156.716	167.719	152.635	152.611	151.775	149.901	145.892	167.778	153.654	151.436	153.229	158.384	189.757	154.456	158.607	182.567	151.856	161.827	147.347	162.782	158.179	182.974	155.505	159.604	145.756	196.241	137.321	151.411	155.159	165.017	189.946	173.243	160.776	164.797	203.96	158.548	148.594
ENSG00000095139_ARCN1	37.5269	39.5612	41.1767	144.072	160.56	153.824	170.757	134.107	127.268	146.667	164.802	178.291	163.468	153.789	164.422	163.721	166.654	138.309	138.351	143.242	155.843	145.772	153.205	157.843	158.283	165.733	170.08	146.774	158.916	156.506	180.492	151.898	122.542	189.554	153.341	164.392	164.329	149.939	162.091	160.468	165.271	156.188	195.853	158.488	150.614	167.76	158.207
ENSG00000114686_MRPL3	37.7813	39.5786	41.4552	168.988	143.087	172.322	139.54	135.404	132.539	160.639	189.119	158.369	159.506	152.509	158.26	159.749	161.882	170.177	147.308	167.191	144.888	153.901	162.639	150.921	166.491	150.195	157.03	166.98	147.047	151.793	153.687	151.121	156.698	154.733	150.553	179.657	151.137	160.733	158.126	168.348	173.198	174.632	158.868	160.939	163.811	162.018	154.656
ENSG00000234742_-	33.3493	39.951	45.5756	186.834	136.628	191.673	164.9	145.551	177.387	172.361	159.361	172.377	220.7	127.787	192.386	118.653	162.129	122.66	118.37	178.666	127.874	122.097	167.341	130.768	181.721	141.508	185.836	206.448	136.477	127.047	125.02	169.331	143.656	132.371	187.246	182.496	167.678	183.162	188.243	160.247	155.9	146.359	142.575	137.565	123.895	213.351	150.818
ENSG00000160213_CSTB	37.7229	39.3334	42.3512	158.403	118.431	163.051	156.044	169.544	141.852	150.798	175.144	149.543	149.89	153.023	148.905	153.349	160.007	171.027	151.173	174.56	178.873	156.441	178.225	180.381	157.091	162.216	157.577	160.934	140.535	168.987	164.709	172.091	179.689	156.936	148.857	154.308	138.905	166.195	145.23	144.273	156.56	174.86	162.271	170.948	162.279	154.098	156.68
ENSG00000085733_CTTN	37.5727	39.5651	40.6119	150.696	173.331	157.815	162.663	161.762	159.908	155.611	133.534	150.156	142.569	158.492	156.118	170.142	142.232	161.56	163.257	159.78	162.498	150.044	162.6	158.029	146.111	164.857	151.832	141.919	159.1	162.296	157.582	166.966	167.84	163.838	159.663	144.098	147.317	163.324	150.92	161.994	141.985	161.374	157.126	162.102	152.365	142.141	155.379
ENSG00000110492_MDK	33.443	38.7691	44.1739	165.744	211.733	151.184	195.86	159.927	133.258	165.238	111.721	121.615	129.019	187.331	140.415	139.552	193.616	136.189	171.142	153.481	132.676	158.848	156.672	167.29	127.61	192.272	209.907	145.272	202.872	182.287	164.907	146.71	169.166	183.841	132.307	120.18	184.861	138.221	125.643	118.623	135.313	149.172	174.271	142.032	161.864	112.151	177.504
ENSG00000099795_NDUFB7	36.2671	39.5021	43.2107	166.011	199.28	164.724	181.989	167.455	210.641	163.196	121.268	135.956	149.306	168.964	131.332	152.142	157.981	171.814	176.388	158.036	167.567	192.254	173.186	166.391	137.366	145.882	149.825	148.458	207.59	145.094	153.097	195.195	183.813	153.932	138.437	119.529	166.627	175.622	125.957	145.06	137.288	170.383	141.959	185.605	153.534	141.341	154.491
ENSG00000006125_AP2B1	37.3317	39.6356	41.0266	147.263	139.425	159.335	158.516	135.241	122.965	155.759	172.11	166.42	195.782	173.82	167.902	164.536	152.365	159.945	139.058	151.113	146.59	151.1	162.103	159.002	168.8	150.425	146.042	159.215	133.389	156.293	160.551	147.512	152.896	160.588	162.82	165.044	144.989	158.569	181.429	168.401	173.949	161.222	152.661	154.351	149.137	159.453	149.895
ENSG00000170142_UBE2E1	37.5658	39.2081	40.5847	147.833	138.548	159.053	154.118	149.8	142.752	165.823	170.937	154.974	148.087	156.812	160.316	151.653	144.194	160.809	147.803	171.956	144.508	159.207	164.242	165.252	172.233	154.095	160.664	152.548	156.852	162.05	152.61	143.076	148.983	160.315	162.435	161.546	167.074	167.347	155.25	156.256	162.854	159.887	146.035	153.64	155.547	165.394	161.219
ENSG00000130332_LSM7	35.1458	39.046	40.6002	158.958	188.25	161.463	149.093	176.261	167.381	155.518	118.869	120.516	153.623	167.297	127.552	153.859	157.921	139.117	163.916	148.264	159.298	144.983	156.85	149.713	121.821	159.251	167.582	157.116	201.254	151.395	157.822	162.713	187.472	148.15	133.151	126.029	165.191	157.63	137.5	125.479	119.343	152.135	147.373	158.615	158.942	128.475	164.975
ENSG00000160075_SSU72	37.7085	39.0192	41.253	155.48	179.658	155.988	151.699	161.812	167.822	147.609	165.182	147.558	143.075	157.153	145.315	156.081	166.706	169.251	156.731	152.521	164.503	166.687	156.046	154.57	136.145	147.961	167.941	150.729	183.52	163.149	172.703	159.12	172.449	162.002	141.768	152.215	163.458	154.547	144.656	149.552	137.434	151.15	156.072	166.157	157.088	156.012	159.542
ENSG00000155506_LARP1	37.5983	39.2784	41.3236	149.832	164.309	150.502	142.524	155.387	149.749	146.809	170.404	175.849	153.443	156.814	153.168	191.143	148.712	173.14	157.779	158.955	156.642	153.987	170.659	157.48	165.623	145.617	146.476	154.826	150.357	162.112	152.513	170.659	155.559	155.805	158.791	159.029	141.183	158.491	161.47	172.905	186.928	169.913	149.008	172.222	157.414	158.64	146.102
ENSG00000112110_MRPL18	36.6742	38.9784	40.3709	141.64	155.503	150.394	147.246	161.096	144.156	147.302	160.065	146.382	134.008	156.324	150.945	169.775	158.581	140.716	154.117	147.495	168.869	157.336	147.638	156.956	132.915	157.341	162.193	157.849	161.508	163.025	173.679	143.095	161.689	167.884	157.396	140.425	157.019	163.572	140.054	150.717	133.618	164.091	161.411	154.875	154.073	146.514	168.428
ENSG00000099977_DDT	36.5522	39.1573	43.3865	176.731	140.436	161.986	132.316	179.521	177.164	150.334	116.656	145.685	155.128	182.074	152.345	159.497	156.812	177.884	135.638	166.667	188.49	183.546	161.636	183.317	151.748	167.938	162.744	174.149	150.432	192.313	138.8	165.482	183.054	169.707	154.599	128.598	144.661	147.779	149.994	134.452	151.613	171.737	139.228	170.369	156.446	149.462	145.269
ENSG00000166197_NOLC1	37.3393	39.0845	41.0598	184.101	151.433	164.1	135.028	172.666	157.298	160.883	169.601	148.016	144.606	150.213	152.695	186.276	132.433	172.608	149.072	157.474	181.823	158.273	163.822	155.972	152.727	162.174	131.632	156.704	157.333	167.822	153.469	174.269	153.429	150.687	147.958	157.573	141.524	166.695	151.877	157.122	148.792	164.285	150.496	170.414	155.543	148.466	146.8
ENSG00000010292_NCAPD2	36.1363	39.2989	41.9681	160.766	130.701	156.032	143.782	147.658	141.959	162.818	163.269	173.441	158.359	144.097	165.775	188.74	138.868	176.219	152.236	161.049	145.2	148.921	172.986	149.775	170.56	146.862	133.301	148.799	134.327	155.978	144.327	172.563	160.871	153.228	176.82	168.053	132.02	158.631	167.33	177.723	149.989	174.72	139.653	170.81	164.431	162.531	133.083
ENSG00000137955_RABGGTB	35.2026	38.196	42.0194	135.434	145.208	162.96	160.667	182.945	131.939	151.882	162.484	152.448	167.702	176.028	171.216	138.181	155.828	140.328	153.119	142.466	166.108	159.047	138.366	198.31	151.454	192.121	176.182	147.02	127.228	192.439	148.38	129.273	142.257	177.867	168.203	156.167	151.991	140.242	164.857	147.868	150.337	139.338	178.824	131.316	179.469	134.184	158.169
ENSG00000205544_TMEM256	35.6389	38.5921	42.5688	146.788	156.08	136.821	197.681	198.626	155.24	137.794	141.097	137.342	145.417	173.549	151.966	129.018	182.487	137.43	170.506	155.842	182.686	151.189	127.891	187.749	151.604	160.654	169.582	159.933	168.914	175.987	171.562	141.682	161.425	175.733	141.542	145.177	156.545	138.344	151.283	151.569	156.444	132.001	172.403	150.25	152.849	153.497	158.859
ENSG00000143549_TPM3	37.4777	38.9672	40.5577	163.036	160.227	155.583	144.009	149.083	150.567	165.014	169.023	154.323	146.402	159.507	149.55	159.316	141.908	160.612	156.889	165.754	152.695	161.67	164.402	168.277	147.56	156.413	145.32	144.88	163.153	160.888	155.842	150.171	149.825	151.262	141.066	163.307	150.168	159.579	149.329	155.895	153.349	156.227	164.211	154.809	172.362	151.205	162.418
ENSG00000155959_VBP1	37.7194	38.6493	40.8634	142.41	149.83	156.485	142.959	154.005	132.798	151.204	194.057	163.515	163.169	152.307	159.745	154.052	175.582	157.383	133.944	148.48	150.769	152.021	151.923	166.724	152.908	167.896	149.25	163.266	147.32	162.954	168.652	151.744	152.186	171.248	152.749	180.512	163.27	145.274	155.876	177.047	163.658	154.424	163.02	146.907	154.771	155.596	165.938
ENSG00000058262_SEC61A1	37.1012	38.8766	39.6544	158.846	170.479	155.93	169.302	150.517	141.276	154.934	150.958	156.618	145.726	155.342	151.949	168.26	146.823	157.219	155.235	144.856	157.497	157.614	158.747	162.285	154.755	151.565	147.701	147.179	162.324	152.541	156.219	154.247	151.707	159.592	157.528	142.857	147.013	159.504	156.931	166.396	155.67	158.228	157.662	163.851	147.614	145.829	145.551
ENSG00000197102_DYNC1H1	36.4316	39.0511	42.0522	140.844	145.689	146.603	162.883	146.094	182.133	144.492	188.204	178.211	140.451	132.065	173.548	196.505	155.693	177.881	168.745	153.15	174.506	150.465	165.309	173.687	165.825	155.199	127.677	144.012	118.346	156.716	145.837	166.599	132.57	146.438	198.433	160.987	123.44	146.021	161.449	203.209	150.108	162.41	114.138	162.143	161.264	156.822	148.178
ENSG00000129103_SUMF2	37.2951	38.8462	41.3631	154.37	174.992	148.639	157.985	166.367	147.409	159.414	134.457	148.725	142.655	172.378	144.775	165.677	177.595	155.374	153.071	176.617	149.167	155.396	166.892	154.997	142.305	164.777	147.873	145.97	164.413	158.501	165.79	163.848	187.368	155.775	166.468	170.293	160.239	145.965	152.101	157.273	153.408	151.244	150.898	151.809	149.221	156.164	153.052
ENSG00000100300_TSPO	33.5746	38.0962	42.5099	144.759	202.105	134.413	145.951	190.018	216.05	134.087	120.511	126.256	134.26	178.013	135.165	156.609	162.696	142.127	178.24	156.185	189.06	165.54	132.379	154.34	137.897	164.617	136.75	122.215	228.318	158.557	171.219	167.535	181.609	139.589	124.24	113.288	166.24	150.429	135.767	157.352	127.119	160.661	129.324	175.237	149.048	124.326	170.875
ENSG00000091527_CDV3	37.0419	38.7294	40.4283	149.052	155.551	153.424	147.981	141.987	136.796	138.423	175.676	163.05	167.542	167.638	160.514	147.827	161.743	152.056	141.493	139.172	149.941	158.825	151.097	151.943	157.606	153.929	154.931	148.728	151.249	167.588	164.741	154.904	135.044	153.969	166.365	172.116	158.249	145.123	156.636	161.623	162.935	143.857	156.846	144.982	160.676	164.045	155.434
ENSG00000142507_PSMB6	35.4948	38.6101	41.3958	172.4	159.356	159.041	135.255	174.082	167.092	153.708	146.152	134.535	142.202	167.884	128.427	175.705	154.533	151.117	165.536	142.905	162.836	154.602	146.657	153.808	135.276	161.302	137.836	137.461	154.347	174.427	157.022	165.599	181.446	157.405	137.022	125.469	164.527	178.674	133.567	141.905	148.158	148.595	151.825	178.95	167.338	141.252	157.766
ENSG00000141425_RPRD1A	35.1178	39.2141	41.9119	153.399	151.076	166.371	137.886	131.179	125.533	167.041	188.837	175.443	175.586	140.307	161.157	165.75	138.312	162.661	125.034	156.975	137.049	140.963	168.181	146.26	175.548	134.46	144.094	168.663	142.347	138.017	157.164	150.349	132.684	157.236	165.554	174.773	146.697	156.738	169.863	178.504	167.85	161.211	169.172	140.017	144.28	166.246	152.434
ENSG00000198805_PNP	36.9469	38.2089	41.7729	161.06	154.147	170.103	173.853	167.326	159.705	152.981	144.057	147.753	148.501	156.82	155.558	150.237	158.165	144.235	161.397	150.017	173.326	166.387	141.076	175.405	144.114	177.677	171.027	149.452	147.892	174.463	175.052	152.691	149.804	186.796	152.276	141.406	151.275	141.574	146.883	139.883	154.676	144.083	175.954	152.471	163.678	134.597	150.589
ENSG00000133226_SRRM1	36.4286	38.8338	40.9025	168.033	166.985	153.983	151.756	155.987	120.522	165.46	163.599	161.097	160.608	161.825	168.063	163.614	118.668	150.231	129.906	175.084	146.068	149.764	162.652	148.773	164.795	163.48	147.486	150.135	117.135	155.985	135.974	165.022	138.039	158.311	166.719	160.101	120.867	142.357	164.546	165.844	162.294	154.685	150.122	138.086	145.597	148.642	132.544
ENSG00000170312_CDK1	35.9218	38.4605	39.4917	155.315	136.902	155.786	140.962	143.114	115.689	156.719	169.087	157.12	168.294	150.265	164.203	140.98	163.356	145.812	124.88	158.85	139.822	147.516	152.665	157.115	158.641	157.071	156.561	149.732	134.322	158.036	157.758	139.551	132.542	173.273	155.423	174.724	150.234	145.408	149.895	149.489	166	150.383	164.343	136.738	152.66	155.019	156.807
ENSG00000175826_CTDNEP1	37.2862	38.5613	40.0101	152.442	160.054	147.602	157.695	142.324	161.43	155.264	151.509	150.324	158.907	149.101	164.647	158.289	149.277	146.078	153.225	152.122	176.506	145.457	162.214	154.196	149.57	135.568	149.89	156.797	157.15	148.808	152.574	160.002	171.776	172.753	162.608	148.059	155.2	164.405	160.569	154.295	157.203	164.902	148.803	152.887	131.95	156.96	141.945
ENSG00000178127_NDUFV2	36.6626	38.1961	39.5857	149.474	140.555	140.922	146.444	161.82	144.119	158.563	175.743	145.716	166.102	157.682	151.292	152.881	156.268	159.482	149.066	148.474	151.535	154.862	141.945	154.333	151.479	148.373	154.162	152.688	152.457	159.194	155.818	135.878	145.798	159.567	154.106	175.724	154.7	142.394	156.413	144.178	163.697	147.271	163.82	137.825	157.101	151.446	167.262
ENSG00000115307_AUP1	36.4925	38.3203	41.2951	159.331	151.492	166.281	145.914	164.376	172.673	160.054	159.57	147.216	139.46	149.64	153.827	169.752	146.137	167.048	159.741	165.448	173.977	160.408	163.78	157.967	138.886	145.296	143.597	149.504	144.886	148.685	142.315	172.003	186.201	152.736	156.904	144.438	130.983	175.687	144.525	151.429	142.244	168.28	150.899	177.574	149.705	156.373	147.295
ENSG00000145494_NDUFS6	32.876	38.0568	40.7545	162.128	189.907	149.727	139.667	159.952	185.72	152.403	131.289	121.136	126.457	177.664	132.15	140.963	148.594	135.494	162.707	152.051	155.001	160.085	142.434	154.035	124.683	168.499	161.873	130.484	198.637	163.122	136.96	170.526	158.994	134.689	120.79	128.011	171.584	154.323	123.946	118.997	118.413	164.51	141.801	165.219	161.104	106.827	175.156
ENSG00000093009_CDC45	37.2531	38.4483	39.1499	148.858	155.095	149.428	163.872	164.1	148.84	156.367	152.378	158.554	150.709	155.788	152.189	161.176	143.963	155.68	153.827	157.757	151.81	153.959	156.677	148.498	159.116	149.047	151.424	145.51	149.108	156.866	145.496	155.86	171.38	149.001	155.371	154.974	142.623	144.275	146.469	158.13	144.689	150.316	154.143	159.974	153.759	154.096	150.825
ENSG00000130816_DNMT1	36.9168	38.0145	41.4228	143.943	180.558	146.797	153.202	157.078	173.728	147.863	149.859	147.895	130.194	160.33	144.683	171.88	141.92	168.66	174.259	159.378	168.668	168.356	155.175	149.934	144.949	165.879	132.55	132.78	171.224	148.632	148.259	174.088	156.395	138.576	149.014	149.981	150.914	158.034	155.28	165.13	142.584	160.814	150.136	171.044	162.892	149.178	147.602
ENSG00000117523_PRRC2C	36.6322	38.3972	40.9139	143.612	151.507	146.668	153.412	152.315	134.129	151.858	174.715	169.89	146.482	144.472	159.296	171.086	136.998	157.411	154.384	148.327	154.756	153.765	160.525	166.25	166.009	148.202	139.494	150.792	131.17	156.106	145.646	164.273	130.257	151.879	166.138	173.919	140.771	148.921	170.806	175.898	156.822	159.999	147.993	156.911	161.804	165.059	142.814
ENSG00000183011_NAA38	35.4156	38.0141	40.0226	173.437	164.606	143.085	137.863	195.818	179.747	157.822	126.113	137.403	149.266	160.1	143.907	126.81	157.598	141.188	152.181	155.974	169.757	156.796	148.543	151.931	140.496	126.182	150.23	135.24	156.087	162.265	163.889	154.334	178.073	164.097	143.101	126.641	160.064	159.546	131.815	147.702	130.675	145.08	146.235	163.51	153.523	151.11	158.15
ENSG00000245910_SNHG6	36.3359	38.2056	40.2085	142.558	156.244	145.375	170.428	157.008	142.384	150.99	153.9	168.449	155.811	131.497	154.906	153.044	208.089	136.174	140.569	148.979	142.73	146.319	161.401	126.843	138.187	159.131	195.79	145.625	196.596	145.333	180.933	147.463	153.896	182.287	142.816	156.372	189.849	148.715	150.174	152.601	155.21	146.76	188.729	145.744	145.02	155.837	183.179
ENSG00000228232_GAPDHP1	34.6571	38.0257	42.1148	165.389	131.122	161.55	186.001	172.869	151.788	174.322	143.883	160.606	182.881	142.739	154.178	101.642	167.134	118.289	134.989	168.901	142.753	135.937	166.241	150.111	184.209	153.126	215.968	199.368	138.717	140.861	140.778	155.325	129.263	143.592	186.586	154.187	175.974	152.418	171.319	129.718	159.552	116.91	138.599	122.734	147.455	148.774	137.185
ENSG00000224861_YBX1P1	34.3758	38.1807	40.6872	168.579	137.493	158.813	127.792	158.64	175.448	172.126	143.154	136.966	168.383	130.599	137.533	118.245	161.499	125.031	145.554	161.954	130.2	145.219	163.014	136.969	168.912	157.78	206.071	154.51	165.285	141.123	146.101	179.785	151.678	151.808	157.591	149.376	181.376	157.265	153.638	128.633	129.985	135.591	143.403	146.976	159.02	155.036	163.329
ENSG00000102316_MAGED2	35.7856	37.5746	43.083	151.189	178.1	148.193	193.9	163.344	151.285	141.465	142.272	149.408	148.775	165.151	153.507	141.961	192.59	138.649	159.156	145.194	160.252	160.433	143.859	163.822	144.252	172.533	185.068	142.903	189.941	171.727	196.511	141.739	144.574	194.005	149.079	135.488	185.289	139.094	144.514	147.957	144.803	137.694	179.351	135.777	161.735	125.967	191.017
ENSG00000175183_CSRP2	33.5844	37.4178	41.6699	131.604	162.521	139.131	173.2	155.057	162.143	142.438	143.096	133.292	153.335	156.412	151.266	120.642	191.889	136.03	152.235	132.867	165.716	158.926	123.026	152.408	145.054	170.209	171.392	129.801	167.001	158.52	195.185	133.747	146.165	200.964	139.272	148.076	175.131	119.448	145.82	133.774	146.027	131.728	189.703	122.454	168.267	137.406	175.999
ENSG00000172354_GNB2	33.9717	37.7996	40.105	155.58	160.582	138.097	149.651	158.477	169.871	135.783	108.371	126.789	125	163.358	135.398	157.506	177.645	151.871	150.526	141.617	182.04	146.439	138.115	152.614	120.789	153.736	141.297	127.591	180.448	158.99	163.802	155.15	160.457	161.084	131.904	121.124	160.047	141.31	122.426	150.497	136.762	163.618	152.539	166.317	136.199	118.747	160.31
ENSG00000143815_LBR	35.6881	38.6103	42.0744	149.83	128.422	154.437	118.075	146.78	137.801	154.446	213.757	173.686	168.32	143.27	164.443	162.351	143.415	161.433	141.156	156.306	144.357	148.738	167.246	147.674	177.436	138.118	132.279	174.018	136.945	143.463	143.127	155.791	142.627	134.94	167.93	184.789	134.352	168.878	170.731	185.576	168.231	168.517	133.435	163.189	155.621	183.008	148.827
ENSG00000167513_CDT1	34.8011	38.0279	40.3567	154.453	198.63	142.719	168.32	153.914	177.292	161.232	112.566	138.13	136.296	168.518	152.768	152.341	142.15	150.795	178	157.59	155.234	155.443	151.883	138.716	129.732	160.06	143.403	138.502	209.323	144.41	140.67	167.121	171.196	141.65	136.392	123.438	161.492	160.09	141.746	142.006	137.828	158.885	129.944	168.849	145.02	135.604	165.221
ENSG00000115524_SF3B1	35.8883	38.1289	40.7619	143.127	141.536	152.306	142.198	147.244	126.034	159.805	206.426	169.646	149.903	134.828	164.129	164.861	151.647	152.725	142.811	154.966	141.575	156.756	151.073	149.147	168.05	157.151	140.95	158.893	135.115	151.786	167.411	141.489	141.943	157.698	156.415	174.302	145.09	148.013	153.151	171.598	180.795	173.077	149.353	144.834	159.167	158.983	165.576
ENSG00000180964_TCEAL8	36.3609	37.888	39.1435	173.214	120.496	158.598	143.928	136.428	120.252	154.623	157.147	147.676	147.797	150.065	152.573	145.445	148.925	152.242	117.923	160.613	139.211	145.443	156.344	154.437	146.146	159.226	150.493	161.345	137	154.973	156.651	136.596	143.23	165.449	150.711	161.947	156.016	150.256	155.853	153.426	166.997	151.649	159.514	132.813	155.516	147.286	151.456
ENSG00000188290_HES4	33.2345	37.8971	41.5158	154.951	261.889	141.956	174.036	202.825	205.743	148.043	107.451	132.67	136.858	197.482	130.358	127.557	153.673	148.752	190.368	162.464	161.881	154.965	140.519	149.504	127.397	164.59	161.585	130.068	258.345	148.178	163.331	172.2	179.954	137.25	118.549	110.205	159.848	166.259	124.06	128.313	133.742	137.98	156.811	170.141	143.225	112.584	165.476
ENSG00000051596_THOC3	35.92	37.8501	39.263	153.6	153.139	149.99	144.203	152.879	151.532	146.133	151.503	136.894	147.767	157.774	150.141	143.506	162.274	140.785	158.28	146.828	152.922	160.315	144.798	140.49	133.572	153.748	154.068	151.816	166.522	160.209	159.711	143.294	157.839	166.882	136.461	141.553	160.04	151.297	139.709	149.441	141.835	148.544	154.886	154.684	147.94	134.289	166.786
ENSG00000221978_CCNL2	35.722	38.2878	41.352	145.882	188.283	180.913	154.308	165.765	145.357	156.144	160.473	157.266	139.743	156.86	142.764	167.067	99.8233	164.339	170.87	160.933	158.167	161.149	154.461	171.858	177.426	134.352	143.258	156.992	131.859	126.787	120.353	166.927	148.966	122.411	144.514	147.471	119.128	178.276	150.396	134.148	145.43	151.994	178.205	148.512	139.444	167.021	150.062
ENSG00000108848_LUC7L3	33.7858	37.8767	41.0589	169.063	164.348	180.872	151.211	130.394	113.244	186.978	188.462	161.667	157.142	113.675	158.299	165.311	134.44	159.547	103.75	176.773	105.227	115.788	170.315	105.898	151.057	133.745	134.86	163.9	135.993	118.291	157.091	151.803	146.769	157.276	170.952	194.607	140.125	201.894	151.069	156.85	150.443	142.1	149.253	160.326	149.819	150.765	162.756
ENSG00000134779_TPGS2	36.286	37.8864	39.8614	151.579	143.649	163.079	161.484	142.605	129.462	150.595	151.581	163.054	141.217	145.756	150.549	164.686	166.711	153.975	144.582	144.823	143.704	154.491	153.078	155.785	146.226	146.022	158.326	156.079	151.512	144.528	156.177	136.287	144.94	157.877	150.046	157.943	144.475	149.581	149.796	161.015	173.384	163.772	168.686	146.817	159.819	160.246	148.346
ENSG00000168137_SETD5	36.5108	37.5966	40.2464	132.853	163.642	143.881	163.512	150.046	137.716	153.833	163.446	167.757	153.103	146.213	157.516	149.587	142.016	153.857	158.985	139.644	146.017	138.576	150.964	148.785	154.085	150.089	140.018	152.49	133.935	146.121	172.303	165.016	115.395	173.636	172.343	150.142	149.253	149.657	160.601	165.762	150.677	161.114	163.449	133.465	150.302	149.227	150.47
ENSG00000077152_UBE2T	36.0157	37.5163	39.0818	141.018	155.793	141.948	155.023	145.854	134.654	146.046	157.298	158.046	153.189	141.232	150.993	150.708	148.657	154.076	139.171	135.811	149.157	147.053	150.131	149.383	157.948	152.144	157.573	145.322	143.204	143.696	162.049	136.482	153.341	145.163	158.179	150	156.506	149.004	146.343	152.094	152.983	135.804	164.606	140.504	159.229	161.942	159.039
ENSG00000198856_OSTC	36.0091	37.5591	38.8794	149.336	141.175	168.26	151.365	136.158	118.866	145.416	146.4	151.812	174.068	155.719	163.114	146.261	153.688	149.12	125.026	153.781	127.367	140.986	155.314	152.34	150.524	158.023	161.772	152.106	132.677	149.949	168.077	128.684	143.606	177.599	148.794	171.808	148.999	145.329	154.815	153.929	173.962	147.051	151.802	134.522	147.884	139.072	155.585
ENSG00000111144_LTA4H	32.1834	37.1791	40.2278	168.417	111.354	148.868	115.383	129.927	127.984	148.009	160.741	161.092	165.368	124.69	173.256	153.61	169.015	128.336	121.591	113.887	160.968	152.953	120.642	161.007	159.397	161.144	135.525	158.091	165.452	132.495	131.017	132.708	147.177	164.63	122.789	122.04	154.75	139.56	132.599	122.199	159.232	147.697	157.607	148.564	150.439	160.988	153.971
ENSG00000111678_C12orf57	35.9798	37.403	39.535	155.042	174.551	151.438	196.175	149.503	166.02	140.852	128.69	147.939	148.008	150.554	156.216	148.297	162.892	138.419	153.953	158.645	148.473	147.284	144.549	144.375	149.721	132.342	143.767	140.13	179.877	135.596	175.09	154.829	174.458	162.829	139.215	138.799	163.266	152.419	154.902	155.181	140.502	146.535	140.065	165.701	144.407	149.141	156.625
ENSG00000113643_RARS1	35.1232	37.6015	39.2686	153.019	125.164	161.045	140.34	137.407	123.204	154.412	180.988	160.409	171.132	138.499	164.843	153.201	150.908	148.042	130.344	152.016	140.431	137.818	149.904	151.801	155.898	156.757	153.323	169.482	126.813	157.989	157.18	140.452	140.615	167.684	149.227	174.202	135.569	145.611	153.249	151.078	162.066	144.679	146.432	144.281	147.444	142.71	146.578
ENSG00000130520_LSM4	34.8541	37.3183	39.481	144.812	172.368	143.315	149.416	154.032	181.225	146.818	123.645	139.137	140.255	154.106	147.854	164.449	149.131	145.467	153.31	144.456	152.078	149.653	147.429	168.382	138.316	156.688	163.387	132.878	179.974	160.158	147.657	149.603	158.162	164.089	129.418	132.538	158.121	144.663	133.222	134.466	134.518	137.491	153.889	153.997	160.909	138.022	157.333
ENSG00000105677_TMEM147	35.7867	37.5493	39.086	143.715	151.509	141.256	155.065	171.672	156.909	146.618	144.397	161.739	153.842	148.411	160.107	140.962	154.259	152.242	157.408	141.932	160.917	159.752	140.625	151.703	146.452	148.179	145.807	153.917	156.77	147.104	139.957	147.714	158.973	151.702	146.985	138.113	124.13	150.53	156.837	150.193	141.86	142.958	150.202	154.329	136.265	161.419	140.711
ENSG00000111142_METAP2	34.5714	37.2083	39.6841	141.484	139.387	166.761	125.795	138.234	152.088	146.234	191.24	148.041	160.72	151.314	163.054	161.729	140.092	138.441	123.875	149.897	149.164	137.257	146.465	128.713	136.967	149.597	159.384	159.235	125.372	146.818	148.503	137.798	157.241	156.551	147.923	187.9	144.964	154.39	133.366	152.152	152.39	164.858	169.958	124.04	169.476	128.968	149.527
ENSG00000090621_PABPC4	36.2834	37.1707	40.0694	144.983	141.59	147.276	148.511	172.266	160.561	155.588	145.636	148.134	144.465	165.443	145.585	163.732	140.471	148.352	170.197	159.429	170.193	172.025	148.854	184.113	149.262	172.829	142.74	131.981	147.469	165.532	138.796	156.007	157.285	142.31	145.661	157.862	138.949	139.105	145.753	153.727	147.395	152.993	154.774	149.478	176.718	137.701	146.431
ENSG00000132432_SEC61G	33.8557	37.39	40.5202	138.677	148.055	158.765	161.246	157.185	127.92	125.641	151.04	141.684	181.555	134.338	167.405	133.333	193.311	131.293	153.516	144.287	129.961	146.13	131.147	128.769	141.848	173.705	175.492	116.821	152.4	173.338	159.789	129.743	162.359	181.171	150.561	168.558	170.223	109.936	148.775	148.47	148.068	146.564	162.701	139.042	159.611	150.346	154.806
ENSG00000158290_CUL4B	32.2211	37.126	39.5233	152.037	130.023	155.477	127.082	133.656	107.655	119.894	163.216	147.569	157.969	151.804	173.247	149.439	144.676	132.693	116.879	149.772	154.84	145.027	157.405	169.877	153.987	142.582	133.859	161.362	108.755	163.378	127.757	132.276	113.391	160.919	158.322	165.579	123.704	123.812	158.135	167.783	176.157	150.741	131.8	128.505	146.543	150.953	122.275
ENSG00000183779_ZNF703	32.9814	36.9656	46.4084	128.122	211.705	124.815	169.061	233.7	222.669	126.177	117.641	127.373	133.354	219.331	131.326	136.906	163.168	137.442	219.123	128.787	190.436	200.058	123.33	197.644	142.127	188.203	147.445	140.8	213.262	190.593	154.966	154.679	148.521	146.786	137.279	119.815	165.533	129.313	135.136	135.414	131.891	152.833	148.28	155.421	177.925	132.031	166.286
ENSG00000266472_MRPS21	35.9549	37.0973	38.3597	144.331	135.524	153.667	152.261	148.118	138.493	155.566	144.229	151.005	155.264	139.235	148.479	147.522	156.206	147.323	136.759	144.297	143.628	139.879	152.374	148.3	153.036	149.173	156.384	152.221	142.551	150.518	142.908	136.531	155.666	156.995	151.46	153.573	145.259	146.262	145.228	149.323	157.215	152.664	156.676	153.87	143.683	143.57	147.049
ENSG00000141552_ANAPC11	32.4293	36.6585	40.0589	151.478	183.327	134.079	157.358	178.27	166.121	147.918	124.983	128.93	142.774	159.118	129.712	127.941	158.077	133.482	164.818	144.27	159.541	144.874	135.817	141.143	109.53	173.746	146.895	129.733	200.27	160.467	158.897	163.453	166.001	167.109	126.876	106.936	159.411	141.674	128.74	127.316	113.745	135.7	157.239	146.373	152.115	122.019	164.559
ENSG00000134057_CCNB1	34.6058	37.1232	39.097	152.241	122.451	148.842	115.88	152.352	138.065	148.533	188.652	144.594	148.453	145.507	138.921	158.856	135.603	171.099	138.257	150.535	156.443	140.61	147.101	154.19	155.854	134.216	123.056	159.569	128.185	149.898	142.862	146.009	156.221	135.469	153.516	165.301	125.484	164.359	147.864	161.661	152.038	159.868	129.173	170.2	144.703	163.298	143.943
ENSG00000101294_HM13	34.583	37.0934	39.4587	164.333	157.238	160.315	130.101	144.612	163.336	145.413	158.58	147.491	148.159	129.756	148.957	148.588	130.512	169.475	147.606	151.784	153.188	172.385	144.928	137.635	158.033	134.672	113.171	151.675	154.755	130.714	130.095	151.958	159.756	125.699	146.437	147.874	134.224	165.022	156.391	149.122	147.357	171.361	140.422	166.517	133.493	156.626	141.887
ENSG00000170089_-	36.213	36.9624	38.7262	155.682	144.744	146.093	145.772	150.614	141.997	141.784	158.393	155.45	158.737	146.821	147.445	147.303	148.667	141.006	146.095	150.061	136.184	153.584	138.246	151.383	147.417	143.566	159.06	164.772	147.455	156.032	155.345	138.708	148.958	165.818	141.71	147.258	167.283	146.032	145.176	150.436	150.946	148.244	163.237	152.756	144.38	139.756	153.095
ENSG00000105701_FKBP8	30.8127	36.8748	41.8597	140.355	210.352	133.203	144.015	184.992	200.457	142.702	117.403	116.992	122.107	192.913	117.605	138.122	159.524	147.675	182.884	137.416	161.406	169.106	147.866	148.915	120.496	155.539	144.183	125.547	232.207	154.628	161.438	165.345	177.219	147.324	115.312	118.315	168.137	153.567	119.682	122.486	120.505	155.718	146.441	178.865	147.175	112.421	173.896
ENSG00000111371_SLC38A1	34.6704	37.2547	40.5498	135.492	142.996	147.07	139.294	119.352	117.673	144.986	181.756	165.735	158.127	132.416	158.878	153.227	149.903	154.086	140.013	138.477	131.835	138.035	162.74	130.705	167.306	132.38	143.022	148.134	162.942	124.248	157.207	143.358	113.507	143.694	162.863	176.206	154.176	160.076	163.15	177.786	161.9	157.099	143.574	146.079	155.353	177.641	162.299
ENSG00000143256_PFDN2	33.286	36.6258	39.4323	157.805	194.727	136.318	128.852	151.105	155.531	165.896	139.796	131.181	135.028	154.573	144.828	151.136	146.859	132.516	139.454	140.811	127.254	135.503	146.148	129.106	128.942	159.395	155.078	123.917	199.029	143.42	161.581	162.2	169.184	155.69	118.327	139.811	165.831	148.301	122.518	128.064	137.039	148.891	152.324	157.501	158.832	123.302	182.277
ENSG00000072778_ACADVL	31.801	36.8319	39.0614	142.639	186.731	156.192	152.379	162.238	155.382	149.686	111.731	132.493	126.877	181.919	132.771	151.514	103.39	166.535	142.295	153.767	156.263	149.387	148.658	149.985	126.706	155.688	128.183	111.613	140.277	158.779	146.46	178.054	172.972	141.141	123.478	118	121.318	171.575	118.868	123.057	132.033	148.196	140.485	179.019	143.014	124.295	160.733
ENSG00000099783_HNRNPM	32.8412	37.2419	39.4107	144.218	153.844	147.062	110.471	152.144	172.347	135.631	170.787	134.076	130.369	159.668	114.762	147.593	125.815	161.286	154.513	143.1	155.291	155.938	154.396	151.456	150.343	155.873	126.582	131.009	163.508	153.85	128.063	161.856	172.6	110.82	120.551	143.495	138.52	158.211	132.434	142.445	122.568	168.028	117.251	176.764	165.889	135.697	154.199
ENSG00000135535_CD164	34.7781	36.8288	38.0218	135.743	139.388	151.609	140.773	138.221	126.561	137.644	167.848	154.506	157.198	145.255	152.214	145.4	141.045	146.055	131.405	135.005	136.596	147.823	146.955	152.651	154.871	130.159	139.02	149.793	140.158	146.422	153.235	136.584	125.841	155.526	150.09	151.707	151.028	140.951	150.973	154.473	162.476	147.676	148.787	140.453	149.029	154.604	148.756
ENSG00000077097_TOP2B	34.4353	36.7539	38.7497	148.334	122.931	147.089	132.919	129.017	116.674	146.942	185.191	156.735	163.367	131.783	157.662	148.775	141.494	148.509	123.138	142.705	132.456	144.604	149.592	153.695	156.352	159.015	147.629	155.434	124.352	143.702	139.72	142.084	125.026	148.388	161.47	178.929	142.543	140.722	152.219	156.053	177.963	147.499	141.349	130.07	146.676	150.086	137.082
ENSG00000168259_DNAJC7	35.2744	36.7726	37.8773	135.342	130.319	149.942	136.039	137.887	143.089	148.562	173.142	146.629	162.71	131.472	140.929	141.603	150.45	149.565	128.781	151.726	142.779	150.224	148.929	124.322	159.028	143.637	145.631	150.705	148.787	142.568	156.602	143.306	156.906	133.76	150.86	163.252	147.552	134.799	154.422	148.826	140.665	157.246	145.432	146.485	144.253	166.934	168.074
ENSG00000011485_PPP5C	35.2766	36.4932	38.1093	144.515	157.965	145.541	151.151	142.167	152.667	150.972	136.329	131.78	134.531	148.998	127.51	154.436	150.889	148.306	148.811	137.956	142.352	149.171	146.072	154.716	131.01	160.262	140.577	142.305	165.13	145.873	151.789	155.019	151.683	141.653	142.879	133.099	156.173	160.69	136.651	141.738	146.987	152.653	141.624	154.884	145.769	131.776	140.934
ENSG00000071859_FAM50A	31.7595	36.583	39.3429	142.893	203.245	150.678	138.259	162.896	184.342	149.509	123.057	122.427	133.412	157.562	125.591	141.261	152.884	146.737	163.97	150.425	155.564	145.341	145.927	129.949	114.325	150.917	145.576	114.088	217.041	143.222	148.116	161.917	170.991	139.522	117.993	126.068	156.8	159.93	122.296	118.274	114.304	144.982	148.604	165.287	151.036	117.186	181.451
ENSG00000069849_ATP1B3	35.2085	36.429	38.1706	140.81	145.531	149.832	143.526	146.588	140.261	138.293	159.061	151.677	158.443	140.791	156.01	145.524	148.509	142.798	129.113	139.457	149.153	142.468	137.328	157.615	140.907	141.98	144.518	148.121	138.358	156.987	149.542	142.427	143.885	152.961	151.845	158.942	140.786	137.719	154.84	165.91	154.966	146.562	145.075	145.901	140.77	153.074	149.398
ENSG00000134440_NARS1	34.8892	36.726	38.3595	145.19	146.146	146.308	141.687	124.722	121.803	138.739	185.096	149.398	154.792	134.363	140.827	149.611	162.139	143.395	140.432	141.769	125.851	140.823	158.067	134.78	148.721	144.787	153.282	139.265	154.705	131.428	156.934	139.012	132.012	144.884	148.835	174.207	157.265	150.099	150.605	157.146	153.49	151.568	147.5	137.794	150.068	147.993	159.533
ENSG00000131100_ATP6V1E1	35.6466	36.607	38.6131	131.193	120.785	144.279	137.709	143.643	125.622	145.155	158.632	163.437	159.269	159.272	154.601	140.77	151.265	150.771	144.789	142.009	153.796	144.657	145.786	149.807	140.714	142.419	156.271	154.008	131.544	140.615	144.631	154.85	157.419	145.433	143.087	160.236	153.074	145.093	148.682	150.592	136.296	147.419	160.884	145.415	147.07	169.399	147.999
ENSG00000110107_PRPF19	34.0665	36.6425	38.6343	153.498	130.681	146.153	129.154	148.148	151.894	149.674	154.882	149.915	146.159	138.619	138.474	167.593	129.351	168.496	144.143	147.085	161.655	149.214	153.503	146.981	145.954	134.553	132.8	156	134	151.126	137.817	159.09	170.695	128.923	138.084	139.111	125.005	161.138	144.34	148.054	135.749	159.267	132.506	178.517	141.318	159.802	122.896
ENSG00000185883_ATP6V0C	32.8635	36.5269	38.3527	139.583	130.959	143.704	140.337	155.166	172.684	156.942	134.489	156.11	141.982	152.347	146.87	153.644	117.126	165.003	146.033	148.241	172.46	149.401	150.307	147.489	143.607	131.316	114.46	146.182	131.868	147.553	123.475	166.011	158.209	113.299	144.896	120.478	113.788	163.628	144.964	152.711	142.372	152.488	128.297	169.854	125.736	151.085	129.3
ENSG00000111906_HDDC2	35.0424	36.4528	37.6261	164.075	141.941	159.938	145.246	130.692	133.401	147.537	149.32	147.725	145.936	145.687	154.326	157.84	151.428	150.548	140.126	121.047	132.696	145.035	145.17	145.118	145.101	150.725	149.98	158.921	141.987	152.819	156.221	137.906	145.411	149.112	139.51	151.775	146.274	137.542	135.053	140.301	150.109	144.952	149.457	135.057	150.373	135.1	146.37
ENSG00000100836_PABPN1	32.8401	36.488	39.9747	157.398	160.104	160.856	147.82	165.392	131.283	150.812	127.184	121.279	127.882	161.046	142.292	162.068	131.09	143.879	133.684	162.316	148.984	87.0945	149.611	137.107	150.288	167.319	162.885	138.516	141.11	159.283	125.512	157.455	99.6438	110.417	143.879	133.281	144.084	171.291	153.903	148.222	136.424	154.276	127.416	167.743	131.594	120.378	165.074
ENSG00000102172_SMS	34.5268	36.1922	38.2508	136.9	154.906	144.615	155.137	149.562	118.574	139.777	158.523	134.981	149.342	144.885	147.636	140.374	162.245	137.846	138.888	136.493	144.045	140.824	132.113	141.792	143.224	145.847	157.009	141.697	147.514	152.34	159.121	137.847	149.33	170.736	144.653	154.418	152.221	133.299	150.579	145.175	154.579	137.62	155.218	128.689	143.46	131.585	153.224
ENSG00000004487_KDM1A	35.0753	36.2164	37.1156	135.168	140.201	143.194	146.53	138.408	134.613	142.329	162.225	146.529	152.765	138.274	146.481	153.414	143.791	146.682	137.877	140.069	145.886	142.922	146.214	142.023	150.993	146.276	140.603	146.998	136.976	144.715	139.525	149.144	144.157	150.351	149.202	156.429	138.687	139.704	148.455	154.721	144.322	149.085	147.178	145.017	148.465	142.568	141.375
ENSG00000065154_OAT	34.7621	36.3462	37.3681	145.447	124.536	157.728	128.941	145.806	136.042	146.349	178.418	146.145	145.322	149.704	148.128	138.922	143.545	148.777	137.249	139.59	149.939	148.344	139.567	160.924	141.209	143.671	136.748	140.709	127.58	159.238	146.111	136.016	133.551	152.786	141.408	150.062	143.134	148.509	137.379	145.479	147.474	152.213	155.582	139.427	142.545	150.958	138.743
ENSG00000214199_EEF1A1P12	34.4924	36.3504	39.309	148.323	142.778	153.049	169.566	159.263	149.229	150.571	149.442	140.664	185.446	137.744	146.225	101.647	165.359	118.605	144.179	151.995	123.781	136.166	154.691	125.416	165.474	139.433	196.904	169.254	150.45	140.3	142.541	140.889	122.963	136.175	167.994	158.084	171.407	144.367	167.661	138.647	136.742	113.908	149.997	132.974	142.539	151.14	144.578
ENSG00000138777_PPA2	33.1767	35.9921	39.9471	141.2	116.968	160.685	157.249	146.36	138.044	116.959	143.141	162.124	144.834	160.524	122.158	131.839	164.755	125.029	134.67	127.694	152.079	151.744	120.94	159.065	140.293	141.363	140.533	167.519	156.965	167.998	160.029	141.791	134.845	161.52	135.428	197.834	177.049	126.746	132.052	144.795	175.376	148.663	130.71	126.055	148.106	145.592	137.128
ENSG00000127616_SMARCA4	34.8236	36.0097	39.7993	146.284	169.312	139.777	151.636	141.77	170.907	152.026	132.181	128.328	135.321	143.796	140.903	171.805	127.753	167.501	166.391	141.672	162.971	137.256	144.354	140.075	123.583	165.396	137.884	139.373	159.298	147.38	149.615	175.447	158.442	127.091	142.935	143.315	144.17	158.896	143.461	149.076	112.12	159.331	139.268	168.312	158.855	130.583	143.908
ENSG00000169504_CLIC4	33.7305	36.2456	38.0228	129.651	145.194	141.457	142.537	118.302	108.379	135.728	166.64	151.33	150.832	137.57	144.888	137.078	165.204	145.637	131.901	130.356	123.342	136.479	151.608	136.407	145.076	134.542	151.949	138.854	153.947	134.02	158.931	128.928	120.223	149.123	142.62	163.047	154.636	143.191	146.431	163.509	152.138	146.072	151.769	134.653	154.594	152.381	163.823
ENSG00000034713_GABARAPL2	34.47	36.1273	37.9192	129.354	139.417	139.248	144.886	154.77	135.671	134.859	152.376	136.113	145.983	147.958	136.975	140.916	165.097	142.683	146.069	132.302	147.669	137.875	130.712	146.78	147.926	145.685	145.113	141.262	151.782	144.132	166.725	122.28	141.561	166.203	156.143	153.013	151.36	139.258	142.477	159.753	140.039	137.895	152.449	135.194	147.283	137.432	155.916
ENSG00000124702_KLHDC3	34.1149	35.9067	37.871	141.434	150.414	140.659	142.892	158.578	160.844	135.222	137.324	132.103	132.735	150.906	140.309	141.935	158.326	142.968	155.104	141.87	155.07	157.334	135.461	150.094	134.123	150.364	136.083	136.872	158.885	152.497	147.637	141.469	159.247	144.285	125.463	131.076	145.526	151.677	136.322	140.82	125.547	146.377	150.617	150.369	147.823	130.376	153.078
ENSG00000109180_OCIAD1	34.7959	36.4184	38.8132	144.066	137.551	158.016	138.564	131.254	118.475	158.182	181.407	153.723	163.371	142.051	149.978	142.228	144.423	150.27	128.297	161.734	136.965	135.311	153.29	141.689	149.666	138.062	144.262	172.205	120.228	144.256	146.381	142.244	144.792	155.763	149.212	167.984	135.305	150.889	153.301	150.159	162.407	180.782	141.041	135.039	161.282	150.51	144.967
ENSG00000141030_COPS3	34.1543	35.6422	38.7984	135.297	137.998	136.078	136.263	159.657	141.609	135.42	165.19	159.232	150.579	157.921	125.805	152.901	153.293	142.492	134.611	157.833	142.448	151.318	142.646	154.364	163.533	131.322	125.549	151.315	141.782	140.123	142.116	126.166	140.559	130.112	155.47	155.981	139.544	152.523	137.877	147.725	153.524	152.096	128.838	156.254	160.999	163.872	137.681
ENSG00000226084_-	32.5532	36.2487	39.9812	169.757	143.302	165.193	160.39	129.115	136.142	148.935	153.439	158.529	198.449	139.723	153.954	107.866	154.811	127.467	133.673	154.595	122.673	116.557	148.219	124.561	178.339	118.947	162.726	178.58	145.168	130.01	130.821	142.517	144.822	128.083	170.698	166.2	145.74	153.511	170.795	144.101	154.531	129.244	142.655	136.439	119.41	168.5	133.263
ENSG00000203875_SNHG5	27.5645	36.0947	40.7077	181.498	106.305	163.009	110.875	160.094	131.874	162.295	206.882	88.2575	171.376	155.291	186.78	98.9384	149.618	104.566	170.792	170.217	128.425	110.052	153.691	131.483	168.716	141.382	139.304	145.072	167.505	94.4452	151.22	98.2607	107.903	120.71	145.197	176.826	128.474	95.7053	181.283	127.074	108.186	145.337	143.685	161.674	120.325	103.203	147.825
ENSG00000175216_CKAP5	33.6296	36.6062	38.6984	148.509	118.537	152.976	128.314	122.048	114.763	157.945	169.893	157.624	149.115	130.292	160.174	158.998	136.704	149.468	127.261	144.237	142.791	137.754	153.561	146.01	153.574	134.533	130.456	152.07	121.485	150.936	141.742	149.396	127.032	146.84	161.315	174.225	128.299	142.458	156.131	167.35	155.201	163.22	136.853	144.349	139.418	153.171	134.513
ENSG00000239264_TXNDC5	33.9727	36.0416	38.0619	137.862	152.833	120.83	148.427	128.769	123.086	145.745	135.864	153.742	151.38	134.448	152.3	151.436	154.408	156.883	136.505	143.626	128.31	135.971	138.612	146.176	143.617	130.936	152.09	136.535	157.76	142.009	161.615	78.2782	144.706	170.615	135.486	141.702	156.832	109.808	147.638	152.886	146.87	146.273	156.96	145.712	139.12	136.917	134.241
ENSG00000171720_HDAC3	34.5852	35.9786	37.1046	141.927	146.166	144.066	130.046	156.76	153.004	136.375	139.78	149.36	140.076	162.274	140.335	154.88	139.874	142.883	137.687	138.557	143.669	137.508	146.384	146.398	137.6	134.354	141.449	148.453	143.763	158.282	138.269	147.895	172.274	145.677	136.075	147.581	132.495	143.582	148.316	151.513	146.077	156.591	147.314	150.39	138.02	145.885	129.854
ENSG00000072501_SMC1A	34.5699	35.9581	37.3604	138.148	151.177	147.082	145.001	127.968	134.264	148.657	147.909	143.51	129.78	130.548	139.767	157.381	141.261	142.102	149.459	134.746	134.201	147.175	154.36	139.033	145.293	148.659	138.676	131.874	156.406	138.844	144.155	153.412	135.096	141.515	141.244	146.691	149.389	147.69	139.822	150.819	132.825	152.304	134.907	151.148	155.326	140.514	154.714
ENSG00000100462_PRMT5	34.177	36.2422	37.8857	151.546	124.144	162.618	114.277	142.457	154.106	145.558	166.671	144.445	135.941	139.753	139.141	160.075	123.122	156.944	140.196	147.355	151.745	148.706	151.534	140.988	150.338	131.75	118.451	150.428	119.895	142.797	127.381	164.144	164.973	131.787	140.619	148.847	115.031	149.266	144.55	140.965	145.387	158.546	145.941	177.555	139.01	148.862	128.516
ENSG00000071626_DAZAP1	32.4807	36.1246	38.8279	155.675	159.572	158.779	112.448	146.064	179.88	149.406	135.612	127.305	129.299	152.22	132.133	143.516	121.042	157.359	148.352	154.221	147.661	149.66	153.161	132.121	132.892	138.264	129.265	136.985	152.259	160.819	123.717	167.723	161.65	121.003	126.742	128.859	143.669	164.151	134.407	135.988	124.384	156.927	129.618	171.699	146.436	130.836	145.328
ENSG00000103257_SLC7A5	34.1116	36.0917	38.5177	136.361	167.549	138.168	158.362	119.917	145.148	144.779	126.23	146.895	138.796	134.213	136.701	158.307	144.484	157.818	156.115	142.798	117.979	142.006	157.072	121.711	148.166	126.212	138.108	129.05	176.952	122.627	143.348	153.708	154.192	122.431	146.635	140.78	144.966	148.9	148.168	162.845	142.812	156.672	131.932	175.45	142.31	147.844	144.25
ENSG00000126934_MAP2K2	33.2739	35.7358	37.7743	148.008	187.249	142.185	148.976	147.826	171.044	148.733	123.359	128.127	121.904	153.117	132.855	147.314	132.408	142.987	165.015	146.847	150.825	142.899	136.517	147.433	133.816	149.469	138.972	135.139	192.523	139.129	139.215	161.353	174.951	138.826	119.631	118.538	151.1	157.995	131.74	140.535	123.925	157.007	131.551	155.978	138.911	124.623	151.089
ENSG00000126698_DNAJC8	34.3037	35.7686	37.0356	157.823	127.415	152.706	127.87	128.953	143.532	149.644	158.478	146.97	138.913	135.865	134.885	147.878	135.57	147.586	143.001	147.58	142.764	147.451	153.469	138.331	137.334	139.115	138.309	139.547	135.619	136.547	135.82	146.596	155.783	138.451	138.719	151.069	135.337	148.23	143.404	137.362	147.105	148.344	137.175	143.295	143.148	154.13	150.095
ENSG00000004478_FKBP4	34.1453	35.6813	36.8001	151.404	138.54	140.092	132.585	146.858	152.165	142.811	146.532	136.577	136.594	143.11	132.186	145.982	132.321	143.604	142.889	136.341	157.138	153.145	140.297	147.971	141.769	156.592	129.6	131.722	142.64	147.93	143.782	147.858	153.139	138.363	128.452	138.074	137.082	143.072	132.425	140.857	132.67	149.032	142.331	147.315	145.442	132.354	144.424
ENSG00000122952_ZWINT	34.0563	35.5531	38.1321	139.08	153.967	149.825	146.241	136.207	142.453	142.977	136.678	131.815	137.843	143.592	138.189	144.439	153.726	148.501	141.774	136.193	142.459	145.501	133.431	145.811	131.455	153.961	156.064	138.654	172.588	151.721	154.158	140.482	135.704	162.197	126.987	136.279	157.798	138.067	129.218	127.48	131.122	136.53	157.017	141.971	152.797	131.394	167.183
ENSG00000012660_ELOVL5	33.2272	35.6746	38.6477	144.616	130.108	149.437	139.695	118.563	117.059	154.724	162.491	163.993	157.408	131.168	159.452	149.959	132.162	154.91	123.745	154.191	122.339	134.54	151.563	138.558	147.896	142.384	140.156	152.632	124.564	137.563	136.871	137.695	125.091	142.905	156.952	162.129	142.492	138.725	152.125	162.852	165.439	148.334	140.28	127.792	144.54	155.353	132.365
ENSG00000168291_PDHB	34.0987	35.6471	36.7575	131.334	143.301	129.095	138.525	143.793	134.802	138.039	161.701	150.58	146.989	146.279	140.694	143.199	157.756	144.824	146.244	133.776	140.315	131.282	136.11	129.153	130.092	146.813	140.112	130.951	147.044	138.14	162.038	146.706	132.608	149.649	137.25	152.144	165.43	137.348	142.493	153.195	142.684	131.422	155.888	140.677	142.979	138.015	158.89
ENSG00000152082_MZT2B	29.8366	35.3455	40.4285	137.188	177.454	135.566	118.328	183.007	202.767	133.161	105.428	104.667	110.504	178.013	108.792	96.4871	139.438	122.405	174.133	162.19	136.618	146.418	107.948	147.468	156.172	144.411	143.325	144.827	248.813	145.185	159.968	160.171	177.009	105.047	101.902	126.897	173.129	163.547	96.6414	131.83	115.109	171.459	128.877	160.287	154.63	122.401	130.331
ENSG00000141367_CLTC	33.4144	35.2981	37.3952	133.823	126.981	133.602	141.812	130.721	122.547	140.206	167.987	149.752	140.573	147.092	160.305	143.525	144.852	144.133	136.249	127.682	137.503	139.508	142.923	149.069	161.109	150.726	139.083	184.448	132.548	139.587	138.022	129.514	118.522	144.042	187.536	162.468	131.903	136.056	179.189	157.902	142.675	132.95	130.203	134.391	146.625	151.876	144.368
ENSG00000198901_PRC1	33.1111	35.7329	38.9271	120.564	135.73	144.039	162.299	127.956	130.273	146.441	155.964	145.529	175.921	128.939	132.944	148.199	146.339	141.73	154.943	136.261	139.08	131.167	136.038	132.477	157.203	139.546	126.766	128.88	164.544	147.275	191.652	129.005	142.401	146.446	136.465	165.036	156.563	162.582	124.839	132.433	148.096	141.352	147.681	143.462	126.846	175.133	156.96
ENSG00000197043_ANXA6	33.0314	35.0001	36.7664	138.998	132.045	144.883	139.508	154.834	145.033	138.787	133.331	124.102	121.663	139.451	134.05	140.072	137.112	146.301	154.512	143.212	146.582	150.978	126.562	141.021	130.582	144.707	128.501	138.598	149.271	142.985	146.382	148.001	149.078	139.928	127.81	131.255	138.09	155.293	130.198	132.367	118.502	155.482	148.659	147.226	148.486	124.233	143.902
ENSG00000104722_NEFM	32.9456	35.3548	37.3701	135.356	179.083	135.804	149.436	144.086	132.348	142.173	110.441	127.055	138.614	142.25	144.751	131.754	144.928	128.831	142.146	134.406	150.817	153.088	131.868	138.542	117.524	177.019	163.704	124.741	172.76	147.346	182.3	145.989	144.831	169.365	132.895	139.862	172.658	116.376	140.199	126.37	130.989	141.275	149.495	119.868	141.563	120.946	162.448
ENSG00000210077_MT-TV	31.3793	34.2781	47.8404	119.834	150.662	120.051	176.213	296.268	195.578	136.882	136.152	124.573	178.711	282.658	137.084	126.761	132.866	172.31	260.29	130.948	291.217	252.819	125.102	327.318	95.1038	223.467	154.016	198.941	102.207	304.077	134.695	140.787	110.052	137.14	108.789	133.053	135.36	93.1009	108.225	98.7132	157.982	142.835	156.43	130.992	258.621	163.825	132.024
ENSG00000183207_RUVBL2	31.0612	36.1412	39.3071	157.657	153.663	158.47	114.196	144.748	175.078	153.932	122.156	124.11	111.536	152.774	124.948	155.896	122.025	158.159	162.658	151.484	148.559	155.942	148.035	133.639	128.253	145.914	117.897	135.168	162.732	144.382	124.651	162.229	182.693	114.887	122.492	112.58	127.37	166.048	124.012	130.161	133.138	169.979	113.225	181.291	146.755	126.709	137.151
ENSG00000068745_IP6K2	33.4514	35.2586	36.8251	146.643	163.117	155.915	166.671	147.519	132.533	160.986	145.107	143.916	128.803	141.81	150.51	142.3	139.328	140.641	125.547	139.328	132.543	135.7	152.23	124.104	129.496	141.199	140.87	141.346	132.908	148.841	152.288	143.625	139.195	155.966	144.968	117.93	151.181	146.09	137.603	128.117	131.968	133.433	145.382	134.924	140.415	139.105	135.391
ENSG00000072274_TFRC	28.6313	37.1796	40.6995	149.019	69.4938	159.037	68.6452	142.108	115.385	154.134	175.426	164.804	163.527	121.619	184.636	166.467	76.8626	150.006	115.635	151.213	154.942	128.047	153.028	139.809	160.134	126.354	72.6017	164.845	69.4745	128.781	79.5028	157.244	125.084	89.5836	176.287	168.727	72.6151	140.388	172.883	176.654	164.725	160.611	75.5155	148.418	114.239	149.156	89.1048
ENSG00000115241_PPM1G	32.6465	35.2973	36.9284	144.554	153.203	140.225	124.313	141.401	157.618	145.135	137.42	123.769	128.395	143.975	122.017	151.347	129.031	146.381	145.21	141.584	159.143	153.196	137.369	135.175	131.887	146.226	125.81	129.74	154.88	140.977	142.378	151.176	161.078	130.327	127.512	133.059	133.808	155.204	122.353	132.383	125.011	148.158	131.363	159.5	142.504	132.978	145.254
ENSG00000157020_SEC13	32.4355	35.1497	38.9934	144.35	162.138	140.846	165.448	149.597	128.112	132.408	118.307	129.735	118.135	142.343	139.237	138.772	161.47	126.915	154.063	146.782	147.426	129.762	131.543	149.152	126.26	158.99	163.032	122.995	170.201	144.932	174.259	141.2	131.884	178.841	140.351	120.532	156.611	130.286	127.698	134.746	130.799	122.679	160.479	134.282	142.849	111.57	162.419
ENSG00000214535_RPS15AP1	30.0276	35.2874	37.5477	154.783	119.785	152.073	140.581	144.479	144.18	150.356	149.311	135.276	158.256	102.986	142.411	89.4238	149.483	100.409	117.854	151.867	105.769	121.378	149.694	117.039	166.174	122.325	198.422	161.367	141.404	110.568	130.036	145.011	121.087	128.15	157.666	140.895	151.465	144.52	154.708	131.238	125.129	110.766	148.022	110.441	122.899	147.108	119.502
ENSG00000172531_PPP1CA	32.4718	35.246	38.1113	149.956	139.116	141.38	129.649	145.564	163.988	152.865	134.194	134.978	128.176	149.416	124.199	161.335	127.132	158.243	156.948	145.456	154.717	153.44	136.411	155.763	139.538	136.726	116.786	143.622	140.588	149.451	122.96	155.47	169.469	120.668	127.038	127.128	118.266	143.166	137.863	146.905	136.771	151.187	119.693	161.334	146.546	130.602	132.715
ENSG00000177410_ZFAS1	33.1508	35.8459	39.0622	91.931	147.076	132.341	156.255	150.138	128.966	123.126	168.987	151.995	156.864	157.431	153.389	105.982	168.343	103.033	146.149	138.673	120.401	136.151	134.536	125.436	133.942	146.725	133.389	141.752	149.874	145.771	174.252	134.77	140.069	167.864	139.508	134.374	173.11	98.6947	160.9	156.231	182.687	137.708	176.518	97.9324	130.454	145.015	149.871
ENSG00000262814_MRPL12	30.1853	35.1108	37.3821	141.037	162.257	132.027	132.746	156.733	169.971	133.62	120.375	119.044	121.546	151.482	116.944	144.51	143.289	149.625	161.689	133.372	150.891	155.868	132.041	139.816	108.596	147.573	119.269	116.223	164.733	145.106	144.395	149.229	158.139	129.509	105.632	118.458	147.666	140.133	110.003	126.928	118.549	146.838	126.982	157.061	149.239	120.473	140.753
ENSG00000105373_NOP53	32.6517	35.3685	38.933	163.661	172.613	155.115	138.81	134.745	146.056	156.762	139.313	113.465	125.831	142.476	122.858	147.887	140.472	144.838	159.722	154.799	103.342	112.035	143.944	102.804	126.192	130.478	146.731	160.675	206.03	136.89	143.962	170.527	162.952	122.75	130.993	160.247	155.913	170.243	131.163	118.594	140.247	155.19	129.339	139.137	135.28	133.735	155.054
ENSG00000205531_NAP1L4	34.0268	35.1986	35.6675	137.782	141.975	133.523	141.998	138.685	128.385	139.038	142.697	142.483	128.292	145.724	144.263	142.305	140.573	131.14	142.906	134.383	135.894	141.444	126.939	138.094	138.842	145.599	136.747	130.889	140.139	147.576	141.955	142.587	139.515	156.443	137.902	147.946	141.052	131.801	145.35	152.055	138.178	134.217	142.521	141.016	141.708	131.154	147.807
ENSG00000047315_POLR2B	33.677	35.3876	36.4311	141.545	125.696	138.913	126.65	127.2	117.419	137.465	178.447	142.174	139.908	120.802	152.708	144.69	137.333	139.534	121.236	156.895	134.839	135.874	143.409	141.708	141.857	131.924	146.466	144.772	121.025	145.773	149.405	137.447	122.791	150.056	148.733	163.01	134.664	143.846	154.249	141.556	148.274	143.348	137.223	129.302	137.251	145.578	141.86
ENSG00000125931_CITED1	29.9268	35.3276	41.3566	199.077	108.442	175.904	96.408	157.655	146.925	172.265	146.365	135.699	154.442	136.916	136.177	158.224	104.87	177.258	129.916	174.896	161.552	136.154	172.225	141.164	138.189	120.012	112.853	179.295	90.6212	142.039	115.505	178.649	166.238	114.053	134.642	140.235	96.7463	189.115	135.792	142.611	141.457	162.993	115.808	176.06	119.606	156.037	90.8271
ENSG00000242660_-	31.1568	35.1497	38.1942	160.686	138.405	132.037	164.857	145.202	128.833	123.691	161.298	117.868	143.613	160.319	157.975	92.3763	184.058	103.946	130.804	132.671	125.625	149.16	152.287	124.411	131.244	144.947	167.806	160.47	142.168	139.008	134.456	110.976	125.275	124.282	149.027	162.128	200.827	139.03	144.994	96.9507	146.671	123.403	146.386	95.3758	146.839	97.1621	152.94
ENSG00000139726_DENR	32.8233	35.1142	36.4619	93.6464	141.22	140.122	131.549	130.585	131.208	143.472	159.648	143.478	98.3809	149.223	137.901	139.384	143.162	144.4	150.846	136.523	128.262	95.3999	147.62	138.908	146.051	136.704	96.0161	131.864	98.1459	142.431	140.792	92.0347	146.304	158.177	143.47	155.999	96.8198	142.433	139.736	156.538	137.853	141.499	145.236	139.747	146.9	103.889	151.258
ENSG00000148672_GLUD1	32.819	35.0774	36.4984	127.538	133.336	143.748	134.194	121.111	110.388	146.534	154.44	146.117	152.853	126.512	146.246	140.787	142.957	140.427	131.726	141.772	123.621	131.126	146.202	127.271	151.807	142.766	135.082	141.557	131.761	138.661	143.084	131.854	130.194	146.863	139.305	157.689	143.706	129.568	145.624	149.559	155.061	140.192	127.984	130.573	142.508	136.486	132.641
ENSG00000070831_CDC42	31.6451	35.0741	37.4807	105.266	115.734	134.928	83.3518	130.785	126.088	143.292	167.874	151.029	146.77	130.503	154.911	140.345	150.925	156.463	128.618	145.045	141.246	124.139	90.8733	127.176	153.671	95.2281	143.139	152.37	140.249	141.576	143.552	126.382	129.581	157.23	139.35	130.325	95.6288	112.9	146.916	151.41	143.726	139.649	134.346	101.764	152.232	158.342	142.998
ENSG00000101166_PRELID3B	33.4951	35.0656	36.5472	143.535	137.136	146.637	124.094	127.614	118.346	137.305	166.621	141.094	152.754	132.276	141.757	138.517	144.746	138.969	124.534	138.078	133.577	133.591	146.293	137.527	146.445	131.837	145.875	151.832	138.409	135.147	148.361	133.313	121.202	142.065	139.646	164.282	143.646	145.764	140.879	153.778	149.811	138.653	151.657	127.959	139.276	143.374	142.113
ENSG00000079616_KIF22	33.6692	34.5467	37.3494	141.545	147.712	141.762	137.303	139.935	155.692	152.434	130.532	136.937	125.522	143.698	135.209	156.527	136.177	154.929	142.485	141.605	151.242	144.628	154.454	134.979	137.574	140.492	129.172	126.563	149.959	136.485	138.499	159.29	168.848	137.874	128.433	134.576	129.098	145.884	133.692	131.365	130.424	153.711	135.779	158.242	135.421	131.245	135.805
ENSG00000216866_RPS2P55	31.6507	35.0527	39.5521	160.278	159.793	151.531	158.224	138.958	166.69	147.407	124.02	134.783	165.763	130.797	130.719	98.0834	143.317	106.739	138.161	148.288	119.117	115.436	155.323	114.733	166.354	132.653	194.396	157.856	170.896	132.002	130.368	168.266	127.711	117.185	158.162	131.931	158.624	143.561	165.263	122.833	126.234	119.479	143.387	132.272	124.156	149.428	141.463
ENSG00000100348_TXN2	33.1672	34.8897	36.6017	156.942	145.096	148.172	138.953	135.42	138.49	151.253	129.993	131.383	132.422	154.385	136.813	146.02	140.026	146.421	133.939	153.325	143.081	146.365	151.376	133.409	129.349	145.761	141.28	141.708	142.806	138.334	141.51	140.211	164.676	132.033	122.545	123.079	150.29	130.744	128.028	132.059	146.568	135.064	146.871	139.091	135.178	120.175	135.939
ENSG00000251495_PPIAP11	30.114	34.4471	37.049	155.698	114.185	147.814	148.044	164.377	147.909	141.94	149.169	132.844	145.606	128.715	120.429	87.7439	137.083	115.654	129.057	146.274	119.959	119.081	162.779	136.438	141.726	145.101	174.63	163.337	122.387	138.494	121.281	153.408	130.74	115.692	154.037	146.245	152.743	148.247	142.785	97.6022	117.677	114.375	137.048	119.482	136.67	120.535	154.07
ENSG00000047849_MAP4	33.7479	35.2619	38.1355	154.33	144.283	142.119	132.117	136.919	130.021	165.822	141.381	136.482	145.117	128.335	144.01	166.856	121.435	174.748	149.293	139.106	129.607	139.124	158.676	149.393	158.341	137.369	128.385	134.835	137.862	140.299	117	157.767	137.661	140.714	145.333	143.396	123.82	153.591	143.906	146.588	157.53	156.874	135.463	158.278	137.477	134.483	118.786
ENSG00000240087_RPSAP12	32.9714	34.9504	37.7988	151.387	129.74	145.899	142.881	152.166	153.945	139.093	130.281	139.339	161.724	138.818	135.235	104.008	159.025	125.554	139.017	143.139	126.78	128.315	147.997	130.852	167.57	140.265	179.732	168.511	135.244	129.681	143.385	147.83	134.986	139.034	172.246	149.058	150.619	142.948	155.79	124.937	147.047	126.774	138.446	128.313	136.88	161.412	136.961
ENSG00000143878_RHOB	26.5921	30.0695	47.2265	103.782	171.443	116.607	189.72	224.345	231.105	120.065	79.4736	114.004	119.184	225.127	120.49	106.251	168.393	104.915	223.155	114.58	227.614	216.009	106.72	217.484	104.333	233.724	167.361	100.441	193.826	219.195	158.662	120.013	116.021	171.339	104.875	99.8043	170.094	86.6025	108.74	107.316	120.884	111.309	161.384	101.299	186.465	87.8208	167.526
ENSG00000115758_ODC1	31.5369	34.9868	36.6897	151.033	112.74	151.841	117.916	121.663	117.42	145.023	150.043	139.65	145.558	140.001	135.071	148.538	121.935	147.131	128.107	141.639	125.931	135.834	141.873	153.48	144.756	137.847	126.798	145.642	114.658	150.539	122.892	139.893	148.973	127.8	134.599	152.118	120.52	132.998	145.618	140.661	150.449	152.065	115.442	140.584	143.396	139.579	120.972
ENSG00000143401_ANP32E	33.6166	34.9598	36.4617	139.663	135.361	146.981	121.077	142.444	129.301	127.839	171.311	140.932	142.916	128.73	137.609	139.246	135.813	142.613	130.205	123.216	131.33	131.252	164.433	135.804	138.868	144.726	132.973	151.358	140.015	139.313	149.662	132.34	134.168	138.985	145.303	154.779	140.726	142.991	140.07	154.924	144.636	146.028	138.952	137.883	146.93	147.951	147.647
ENSG00000138095_LRPPRC	31.1206	34.8709	38.8103	130.449	97.8668	139.721	102.921	124.316	118.384	153.697	185.973	175.102	140.2	129.116	163.603	135.949	117.681	133.586	123.944	151.879	139.234	140.142	171.129	137.891	154.383	118.453	136.558	161.728	111.614	140.664	120.83	155.527	145.223	124.982	136.177	158.006	135.154	159.003	161.278	183.737	145.313	157.72	118.827	148.505	139.246	152.841	108.651
ENSG00000159140_SON	32.0928	34.8935	36.3469	132.512	130.046	134.435	124.092	145.643	113.387	140.827	164.522	144.62	132.956	138.004	144.327	165.148	116.149	149.916	127.813	127.533	148.536	140.084	143.983	149.793	142.307	141.455	111.819	139.388	114.448	139.401	133.229	142.146	123.37	130.235	155.451	149.968	120.971	146.808	143.572	146.966	151.524	144.192	125.011	139.747	137.219	137.133	125.816
ENSG00000232176_-	30.7197	34.842	39.2909	155.052	124.481	144.232	137.534	147.624	147.012	143.876	163.698	136.388	186.507	120.095	139.581	90.0664	161.695	117.237	120.752	144.345	105.667	113.239	160.672	107.683	180.258	129.339	204.797	166.184	140.931	123.218	139.155	157.296	122.766	120.717	168.641	166.228	156.766	135.842	164.335	124.773	132.436	113.575	126.511	121.877	136.373	154.192	143.094
ENSG00000120727_PAIP2	33.3371	34.8343	36.3867	133.091	149.449	145.583	143.558	137	111.41	143.639	145.832	143.859	141.754	140.327	140.059	138.861	155.826	137.093	122.757	136.817	135.661	124.536	143.025	115.182	138.973	121.488	159.193	128.167	145.769	134.605	152.391	134.696	134.121	162.286	138.192	153.602	139.734	135.186	139.701	140.644	147.992	131.177	148.669	130.777	124.469	123.24	145.439
ENSG00000099622_CIRBP	28.882	35.9646	38.7461	165.433	99.4534	149.595	139.576	111.182	111.481	155.189	148.749	150.689	189.707	111.674	154.37	120.214	122.257	174.71	112.552	171.193	115.504	136.701	142.924	135.64	160.173	99.3696	144.793	150.58	96.9469	151.335	133.394	168.511	173.068	130.913	172.03	145.602	125.284	137.678	111.238	152.3	149.879	160.652	115.602	149.908	93.9679	165.427	106.601
ENSG00000167085_PHB	30.9475	34.4956	38.3493	165.796	126.908	145.077	109.892	154.4	119.482	160.835	156.108	139.081	148.158	126.351	141.295	133.878	150.585	164.809	169.238	171.591	170.594	122.353	124.779	132.314	140.277	126.236	136.391	150.572	117.114	122.568	127.772	164.852	177.016	109.992	115.217	142.403	113.185	123.461	149.99	111.562	154.335	136.884	120.767	134.48	125.208	140.654	143.907
ENSG00000148248_SURF4	33.8053	34.6994	36.5106	131.967	152.936	135.111	155.917	149.874	139.209	134.22	120.037	137.665	138.146	144.661	137.436	142.223	152.036	144.317	135.852	130.685	151.427	146.503	135.831	155.854	133.194	138.939	143.483	125.584	149.665	140.755	156.794	136.197	141.398	155.318	137.347	126.13	143.382	135.551	137.838	130.897	137.882	138.656	151.96	139.145	132.575	126.096	140.586
ENSG00000174903_RAB1B	32.6964	34.5557	36.3947	139.227	164.375	134.855	139.034	137.083	158.854	142.731	112.408	122.67	122.529	146.372	125.368	151.706	131.79	135.337	155.394	130.708	157.695	140.425	137.456	139.736	127.116	131.525	136.78	128.23	166.599	138.989	142.32	145.843	155.253	135.117	129.272	114.034	143.856	155.092	119.072	142.381	126.846	144.787	137.01	154.466	136.459	131.019	140.608
ENSG00000054148_PHPT1	31.8259	34.5975	37.1127	149.173	152.617	148.856	140.263	147.991	138.556	144.294	100.027	130.48	119.927	163.382	119.625	139.571	126.777	144.211	148.604	142.799	158.523	162.669	134.915	154.399	114.823	133.69	135.708	143.964	149.6	147.479	128.884	131.182	163.491	136.15	125.619	106.939	132.133	147.584	119.471	119.728	125.055	145.33	130.916	163.747	133.161	123.18	138.224
ENSG00000127483_HP1BP3	29.3672	34.9652	36.4294	128.638	141.6	145.969	116.858	111.922	89.9978	142.581	165.531	156.839	144.95	103.353	144.433	153.38	116.81	143.744	108.365	142.863	97.1486	107.161	139.7	103.301	152.071	117.229	141.316	142.789	134.925	109.131	138.771	128.49	118.19	123.737	147.383	157.007	120.202	140.884	156.606	169.625	137.95	140.022	153.218	136.959	124.309	148.208	144.964
ENSG00000171824_EXOSC10	33.2462	34.647	36.8766	146.549	133.441	147.464	124.487	138.849	124.288	149.409	158.001	146.723	137.081	130.329	142.609	158.212	117.544	149.303	138.092	141.018	137.869	131.771	148.22	133.888	143.945	134.541	132.742	150.534	128.938	132.904	129.408	147.52	136.131	136.208	143.436	141.474	130.625	146.283	138.327	154.533	151.983	144.014	133.226	154.45	135.206	148.016	129.388
ENSG00000160710_ADAR	33.4001	34.6558	36.0023	137.786	142.245	139.288	137.604	129.06	116.968	137.481	150.92	144.193	131.535	134.614	142.883	164.32	128.502	137.703	133.448	139.855	139.982	138.218	146.021	139.029	141.978	136.593	122.488	143.457	123.291	138.131	136.369	131.555	123.133	141.749	144.87	146.003	123.134	134.057	147.223	146.742	143.062	150.52	135.418	147.198	143.368	148.841	125.01
ENSG00000126088_UROD	32.1371	34.4459	37.5146	158.829	137.705	157.023	143.606	168.409	172.991	142.791	135.311	128.324	139.016	156.629	120.346	131.394	129.221	145.318	134.188	169.24	141.921	150.225	143.666	131.839	149.559	132.662	134.758	137.862	118.175	133.654	133.902	171.299	161.264	117.771	122.085	124.246	118.268	151.615	127.076	138.428	127.053	140.215	111.373	149.188	155.968	136.082	126.689
ENSG00000125676_THOC2	32.6394	35.0168	36.0514	134.75	141.46	142.983	130.432	124.242	123.885	137.516	172.332	151.077	136.566	127.018	143.632	141.017	128.225	137.326	120.673	144.012	130.05	122.237	147.77	132.793	147.361	130.933	139.86	154.388	131.154	130.079	142.161	133.103	117.821	147.897	148.985	158.421	131.674	143.621	140.901	158.607	143.391	144.27	147.952	127.907	134.606	140.275	143.036
ENSG00000101367_MAPRE1	33.2762	34.3748	35.3927	126.331	133.846	132.346	129.262	135.028	134.69	139.071	160.348	137.365	146.845	132.467	141.634	142.483	143.784	138.878	129.955	129.787	130.033	135.182	129.708	141.382	147.045	135.219	137.021	140.411	139.522	140.878	148.218	133.816	130.72	147.638	136.095	149.527	140.396	132.868	139.303	143.743	132.157	137.633	145.212	136.043	135.981	137.861	137.718
ENSG00000204389_HSPA1A	28.331	34.3969	39.6865	145.78	151.665	150.549	107.408	236.488	157.973	157.294	85.9949	116.77	133.616	211.63	139.681	135.495	97.0973	154.459	174.076	145.389	201.762	159.004	141.737	219.173	117.454	222.036	112.976	114.369	124.471	226.149	104.764	173.751	166.569	110.745	120.999	99.4784	111.203	125.958	123.726	109.775	119.292	165.175	103.033	141.812	154.103	89.0087	121.452
ENSG00000071553_ATP6AP1	32.938	34.568	36.9966	140.566	155.973	136.336	146.376	117.947	153.501	148.253	145.33	163.148	135.912	116.222	131.714	163.83	133.567	165.845	132.492	134.362	143.206	131.215	146.229	150.834	137.524	125.356	122.452	146.895	142.747	137.675	137.491	143.089	151.069	135.577	135.327	126.115	116.58	121.017	113.527	160.072	138.868	147.188	140.048	172.962	131.865	158.428	115.518
ENSG00000131174_COX7B	32.0856	34.3503	36.5048	146.651	122.351	146.098	137.793	147.77	136.895	148.565	123.978	135.924	152.613	130.193	128.039	125.62	150.763	131.66	119.507	133.57	146.58	134.371	126.658	165.952	145.784	125.33	149.192	155.921	126.965	166.713	143.387	129.262	131.943	138.468	137.965	138.547	143.062	141.061	139.748	123.026	137.009	129.252	142.771	125.665	135.215	127.572	139.269
ENSG00000185164_NOMO2	33.6535	34.4061	35.5704	136.242	147.762	135.508	142.39	129.387	139.894	140.109	137.225	145.445	138.557	134.549	140.577	137.773	129.286	135.608	138.274	130.297	134.811	142.658	136.419	129.707	143.677	141.869	133.492	133.712	136.848	141.958	145.36	162.198	132.461	137.476	144.058	156.579	140.077	141.521	137.25	136.574	135.853	126.062	130.951	144.622	150.577	131.911	141.331
ENSG00000179950_PUF60	30.3469	33.7001	37.2629	131.086	164.03	138.557	122.354	142.274	171.158	132.784	116.533	124.725	108.541	153.346	110.329	127.679	130.587	147.589	160.279	128.973	152.358	154.698	137.339	140.421	120.996	151.489	123.712	120.781	170.642	139.009	136.816	148.85	156.801	120.655	108.123	104.984	128.565	141.74	114.461	123.831	111.453	149.119	122.643	161.522	140.55	121.065	148.799
ENSG00000184216_IRAK1	31.3732	34.6052	37.8164	150.88	178.047	128.842	120.498	136.883	159.546	140.922	136.737	119.471	112.57	144.969	126.934	149.924	125.467	161.278	151.532	145.246	165.461	151.394	145.744	121.582	127.627	140.607	117.235	125.572	171.954	118.917	129.153	156.042	174.057	119.835	124.787	115.158	132.486	151.797	128.315	145.179	127.425	147.088	131.225	162.78	142.148	113.059	139.958
ENSG00000044115_CTNNA1	33.0715	33.9954	34.9853	135.112	131.371	137.825	137.762	131.419	121.559	137.977	142.019	142.19	135.641	131.387	145.328	153.479	131.024	136.658	130.914	129.775	136.323	138.209	132.667	140.145	134.613	139.133	137.898	131.881	132.186	137.13	141.751	133.268	124.717	149.593	135.257	145.219	132.586	134.813	144.111	140.667	139.71	130.636	135.063	137.58	132.92	135.124	140.018
ENSG00000049541_RFC2	33.0357	34.0583	36.9403	151.391	149.16	134.105	149.803	133.137	125.19	130.382	132.425	138.821	136.486	137.154	144.68	132.456	151.977	139.185	134.76	134.695	136.135	132.11	128.757	132.24	123.197	136.331	153.474	118.984	148.788	159.421	140.869	135.182	137.532	154.257	120.82	132.487	144.106	127.327	160.928	131.896	149.114	131.551	137.473	135.472	141.092	128.416	150.683
ENSG00000011052_NME1-NME2	26.2901	33.7012	39.915	188.49	145.788	155.947	149.607	156.467	143.425	167.852	101.84	105.104	84.2602	152.409	120.912	94.176	117.978	166.69	177.966	136.438	195.979	133.304	160.724	126.247	100.397	89.9433	111.328	122.762	146.266	227.194	155.062	133.432	136.177	181.144	105.329	115.846	120.488	82.7134	120.752	180.139	92.7919	151.654	373.76	162.765	78.4968	94.1539	101.093
ENSG00000050426_LETMD1	32.3356	34.0172	37.6734	133.132	145.479	167.652	155.681	105.224	116.14	150.739	137.808	157.268	147.061	120.384	165.398	144.884	125.979	136.158	119.465	151.012	97.2461	127.767	138.522	129.226	162.313	132.347	124.063	159.632	130.869	118.463	135.979	130.959	142.704	151.381	142.566	147.307	147.657	134.492	150.556	151.704	169.825	132.958	133.394	130.847	123.163	129.72	129.69
ENSG00000181789_COPG1	32.9303	34.013	35.0073	135.837	154.516	132.937	166.206	134.003	122.219	136.386	130.817	140.608	139.441	135.783	142.069	143.168	139.671	131.839	127.147	136.095	138.683	132.54	134.396	140.772	128.147	135.027	131.682	127.206	131.021	139.756	138.324	133.842	138.255	148.693	141.274	136.078	137.089	124.817	141.033	140.12	136.261	136.026	130.109	142.232	129.267	132.53	125.613
ENSG00000171848_RRM2	32.2703	34.0029	36.1565	139.697	137.129	133.208	125.828	136.16	132.106	138.776	146.559	142.021	146.897	144.537	151.454	147.692	126.779	135.059	133.643	134.379	132.586	134.76	141.229	148.872	143.932	152.301	131.835	136.118	115.231	144.93	128.183	135.906	128.376	128.996	144.655	145.909	119.174	125.812	143.988	146.14	146.581	131.707	129.337	124.219	143.246	127.541	121.68
ENSG00000114784_EIF1B	32.5428	33.9894	35.5551	137.98	135.773	140.082	143.43	119.136	119.169	138.612	131.796	151.465	148.957	131.164	141.335	129.861	145.364	132.185	114.052	139.793	134.398	127.116	131.101	137.098	136.143	132.732	154.772	136.724	131.185	135.676	148.479	118.677	135.65	152.909	142.515	134.398	148.429	129.539	140.834	146.414	136.381	128.89	152.767	111.531	124.362	128.8	140.98
ENSG00000132716_DCAF8	32.5261	34.1115	37.0502	148.636	154.662	138.594	131.388	136.246	121.223	153.398	135.031	157.356	151.336	135.864	145.624	159.532	111.31	158.214	130.03	139.456	125.835	130.718	145.096	136.646	137.376	135.883	130.328	145.197	127.927	133.959	130.791	138.32	128.798	137.847	146.896	146.632	125.587	134.088	154.744	151.855	149.145	133.942	125.068	152.095	129.82	129.486	126.175
ENSG00000105258_POLR2I	32.491	33.6706	36.5675	149.414	148.749	141.67	132.118	132.598	130.325	146.946	125.69	125.865	126.692	144.243	131.684	140.738	148.06	137.551	131.851	141.465	133.151	132.631	140.188	129.844	142.143	134.24	134.547	143.349	169.698	124.062	139.509	128.551	155.987	132.402	124.392	123.766	151.316	153.275	134.597	127.925	141.829	128.037	147.795	150.122	126.676	157.206	134.768
ENSG00000180957_PITPNB	32.4766	34.0173	35.2092	122.796	135.548	137.221	136.707	122.805	125.216	129.733	168.408	140.431	145.565	138.456	149.621	133.861	146.482	130.605	123.415	128.958	125.962	135.653	137.331	144.98	141.517	140.972	132.062	131.127	136.486	131.894	139.254	121.229	123.974	137.123	151.111	152.893	125.652	131.491	138.731	156.336	143.229	137.278	130.425	126.094	133.551	138.959	134.421
ENSG00000127540_UQCR11	32.2567	33.8708	35.5034	136.483	128.763	133.703	139.611	154.188	143.281	130.861	135.11	126.839	145.003	141.054	123.715	125.064	145.457	127.213	144.554	132.243	140.776	141.643	121.516	147.827	117.085	132.152	137.557	132.066	147.379	138.73	139.055	125.331	146.949	139.808	123.664	121.757	131.129	130.969	130.886	142.137	135.856	129.819	153.514	153.277	122.868	138.414	133.77
ENSG00000112312_GMNN	31.6872	33.6624	35.0207	126.919	126.692	137.284	114.446	142.557	129.395	135.046	150.653	134.253	136.084	137.964	125.223	127.779	133.148	135.268	125.564	135.899	145.022	140.405	122.248	145.284	132.063	150.704	127.622	132.419	123.053	158.392	146.826	120.119	123.502	140.711	135.481	142.143	137.343	136.18	121.759	122.298	125.989	132.454	136.808	129.979	139.114	129.983	145.696
ENSG00000177556_ATOX1	31.4419	33.774	35.2763	141.151	113.683	139.028	127.958	155.821	140.966	150.767	125.673	118.656	135.238	135.493	127.292	123.181	135.357	131.622	129.596	142.434	135.897	146.367	114.426	140.659	119.148	132.63	142.542	139.291	126.053	149.525	125.266	129.087	149.417	134.087	126.756	144.006	118.355	110.918	143.033	136.178	115.45	132.565	134.954	141.461	138.018	139.39	119.75
ENSG00000169750_RAC3	31.0741	33.4091	36.6582	135.081	161.841	119.617	128.412	154.336	170.12	138.918	123.396	116.404	125.681	155.554	123.835	146.821	130.04	142.466	156.172	127.46	152.042	152.172	127.423	140.305	126.857	133.545	128.397	141.052	161.717	141.614	127.925	146.066	161.794	120.021	108.655	106.664	117.698	142.395	118.25	118.224	133.181	143.913	133.728	155.747	120.785	130.543	142.268
ENSG00000123349_PFDN5	27.5182	33.6997	38.7088	137.807	163.491	111.959	112.236	200.739	98.0725	132.769	106.686	161.226	156.111	151.009	156.741	109.864	137.101	165.121	74.3546	83.2663	102.465	83.7213	122.274	147.275	60.5696	183.285	127.804	144.766	164.841	119.516	158.567	113.6	181.673	144.289	143.415	110.699	138.104	144.266	83.1834	107.9	102.72	141.498	190.318	135.407	128.16	119.577	134.19
[truncated: 67,638 more rows]
