# Supplementary material
Source: HighWire-hosted journal article supplement (doi:10.1101/rna.080566.125)
Supplement: SupplementalTable8.xlsx [file SupplementalTable8.xlsx]

## Sheet: Table S8
miRNAs per 10 pg total RNA	8 brain regions	colon, illeum, jejunum	sk.muscle and heart	kidney	liver	lung	spleen
mir.124.UAAGGCACGCGGUGAAUGCCA _min	45320	39.2444	12.5902	87.8189	8.54767	8.02585	1.67874
mir.124.UAAGGCACGCGGUGAAUGCCA _max	137057	91.8236	229.203	148.332	35.4094	59.578	43.8865
mir.124.UUAAGGCACGCGGUGAAUGCC _min	12711.8	11.8522	0	13.9749	1.98956	0	0
mir.124.UUAAGGCACGCGGUGAAUGCC _max	33824.5	22.0915	52.8025	37.7677	8.48567	16.2875	11.7816
mir.127.UCGGAUCCGUCUGAGCUUGGC _min	1939.35	112.485	78.6172	25.4223	10.0214	51.058	7.51078
mir.127.UCGGAUCCGUCUGAGCUUGGC _max	10339.9	270.861	175.939	81.4969	13.1999	69.222	10.7295
mir.138.AGCUGGUGUUGUGAAUCAGGC _min	1981.76	133.376	29.1862	36.5725	4.92379	38.5924	52.1336
mir.138.AGCUGGUGUUGUGAAUCAGGC _max	33032.2	261.204	124.894	76.1119	6.55816	70.9796	81.4094
mir.9.AUAAAGCUAGAUAACCGAAAG _min	4384.05	3.71541	0	18.435	0	0	0
mir.9.AUAAAGCUAGAUAACCGAAAG _max	11393.9	7.40607	33.8328	34.8847	4.39999	17.7877	8.5417
mir.9.CUUUGGUUAUCUAGCUGUAUG _min	2654.86	3.91809	0	24.233	0	0	0
mir.9.CUUUGGUUAUCUAGCUGUAUG _max	7591.19	9.73303	21.3166	36.969	1.78095	7.28651	3.38722
mir.9.UAAAGCUAGAUAACCGAAAGU _min	2979.13	9.90771	12.5902	51.2908	0	0	0
mir.9.UAAAGCUAGAUAACCGAAAGU _max	7824.58	22.0915	24.5932	67.8912	1.83955	12.2156	4.1972
mir.215.AUGACCUAUGAUUUGACAGAC _min	0	3105.11	2.85026	0	0.778271	1.70762	0
mir.215.AUGACCUAUGAUUUGACAGAC _max	0	44310.3	205.948	0	2.57904	97.9564	8.81335
mir.133a.UGGUCCCCUUCAACCAGCUGU _min	0	6.7993	3331.73	1.93269	3.68435	29.5419	0
mir.133a.UGGUCCCCUUCAACCAGCUGU _max	8.12912	21.6231	7779.11	2.59474	8.79998	75.4369	3.82662
mir.1a.GGAAUGUAAAGAAGUAUGUAU _min	1.61726	35.0006	9644.94	5.77213	10.1688	90.675	2.06178
mir.1a.GGAAUGUAAAGAAGUAUGUAU _max	27.335	95.0261	31956	9.66347	23.3481	224.596	12.6053
mir.122.GGAGUGUGACAAUGGUGUUUG _min	0	0	0	1.04068	3199.19	0	0
mir.122.GGAGUGUGACAAUGGUGUUUG _max	10.4139	0	25.1921	2.88302	4374.42	23.4388	4.53259
