# Supplementary material
Source: HighWire-hosted journal article supplement (doi:10.1101/rna.080566.125)
Supplement: SupplementalTable9.xlsx [file SupplementalTable9.xlsx]

## Sheet: Table S9A
median miRNAs per 10 pg total RNA	brain_amygdala	brain_caudate_putamen	brain_cerebellum	brain_cortex	brain_hipocampus	brain_hypothalamus	brain_nucleus_acumbens	brain_thalamus	colon	ileum	jejunum	heart	sk_muscle	lung	spleen	kidney	liver
mir.122.GGAGUGUGACAAUGGUGUUUG	2.0755	0	0	1.14056	0	0	0	0	0	1.94362	0	0	1.37431	4006.73	0	5.09771	0.973136	>1,700 copies / 10 pg total RNA (marked in green)	<340 copies / 10 pg total RNA in at least 13 tissues (marked in yellow)
mir.122.UGGAGUGUGACAAUGGUGUUU	69.1021	8.97739	15.5492	37.4959	5.54575	4.7265	10.6455	6.06922	0.727382	85.6487	1.2244	0.82787	33.0045	140126	15.8658	216.396	33.4887
mir.133a.AGCUGGUAAAAUGGAACCAAA	0	3.09438	0	2.13618	0	0	1.88343	1.78506	11.6869	1529.81	8.05236	5.09319	0	7.07521	26.5351	2618.68	0.545589
mir.133a.UGGUCCCCUUCAACCAGCUGU	2.80803	6.76074	0	5.98793	0	2.20969	6.42135	4.53555	21.2591	3817.34	15.3821	7.69303	2.06146	8.27799	54.3382	5427.76	1.4689
mir.133a.UUGGUCCCCUUCAACCAGCUG	39.5567	78.3582	11.0718	78.9051	18.6289	44.0096	72.1458	71.2395	433.082	62743.6	321.062	178.354	33.9456	137.342	827.559	117985	29.5021
mir.133a.UUUGGUCCCCUUCAACCAGCU	30.8884	53.9013	89.7135	54.6951	14.1733	44.8074	41.676	58.2844	271.269	27633.8	213.112	127.332	21.5746	80.911	365.258	67468.9	14.7371
mir.133b.UUUGGUCCCCUUCAACCAGCU	2.68594	9.34208	52.9218	3.78282	1.35676	4.47022	5.91772	7.32466	19.9011	924.193	12.5052	7.51302	1.28847	4.99362	14.419	3297.02	0.391705
mir.194.GUAACAGCAACUCCAUGUGGA	1.99099	1.67612	6.6133	1.63955	2.94367	1.47806	2.36079	1.96929	415.403	3.91158	694.419	1728.71	131.11	158.279	3.26309	0	0.818714
mir.1a.GGAAUGUAAAGAAGUAUGUAU	9.03459	16.5139	2.12608	20.5529	4.11288	9.5753	15.109	17.5166	77.734	10162.2	71.5421	41.5678	7.35172	20.9523	150.897	21820.8	5.21417
mir.206.UGGAAUGUAAGGAAGUGUGUG	1.83133	73.149	585.722	2.13617	4.53625	2.70073	42.1166	14.2805	0.99189	2.50935	0	0	0	15.6095	1.0685	2328.39	0
mir.208a.AUAAGACGAGCAAAAAGCUUG	0	0	0	0	0	0	0	0	0	4264.71	0	0	2.88607	0	58.8358	2.03907	1.13315
mir.215.AUGACCUAUGAUUUGACAGAC	0	0	0	0	0	0	0	0	3539.89	9.14152	10453.2	41963.7	0	1.3619	3.31753	20.1431	1.40664
mir.215.UCUGUCAUUCUGUAGGCCAAU	0	0	0	0	0	0	0	0	219.123	0	582.831	2165.79	0	0	0	0	0
mir.34b.AGGCAGUGUAAUUAGCUGAUU	322.558	99.5507	84.5533	122.296	166.999	141.028	95.249	311.207	23.7564	44.0418	27.7694	23.2213	84.4729	6.70554	4149.44	20.1359	5.72563
mir.34c.AGGCAGUGUAGUUAGCUGAUU	388.73	118.382	99.2721	132.176	200.362	176.069	111.833	348.947	26.1896	57.0948	30.2182	24.8033	105.519	6.11601	5588.87	19.8811	6.60848
mir.375.UUUGUUCGUUCGGCUCGCGUG	27.6324	5.74671	2.41393	8.12912	11.3104	9.63669	5.94921	16.1872	2985.75	0.970781	1753.61	1113.65	124.547	3.16854	235.716	12.6966	75.4576
mir.486a.UCCUGUACUGAGCUGCCCCGA	69.3828	57.688	239.853	53.805	48.7713	79.2673	75.7508	66.1749	38.6669	2542.19	36.184	28.7346	332.447	173.496	573.386	1298.26	190.514
mir.486b.UCCUGUACUGAGCUGCCCCGA	69.1414	57.4663	239.584	53.538	48.7713	79.005	75.5267	66.1238	38.7336	2542.12	36.184	28.7987	331.485	172.98	572.086	1294.18	190.024
mir.499.UUAAGACUUGCAGUGAUGUUU	5.73816	6.71923	4.38694	9.81629	5.37856	9.51719	5.60287	8.05828	0	3138.99	0	0	3.02719	1.48579	2.14005	88.6999	1.7848
mir.802.UCAGUAACAAAGAUUCAUCCU	1.95342	2.4755	0	9.8163	0	0.656455	2.6441	1.64218	5.87683	0.777451	920.292	1985.07	280.231	718.298	0.768435	8.01817	90.3108

## Sheet: Table S9B
median miRNAs per 10 pg total RNA	brain_amygdala	brain_caudate_putamen	brain_cerebellum	brain_cortex	brain_hipocampus	brain_hypothalamus	brain_nucleus_acumbens	brain_thalamus	colon	ileum	jejunum	heart	sk_muscle	lung	spleen	kidney	liver
mir.10a.ACCCUGUAGAUCCGAAUUUGU	3.70482	2.03345	5.07441	2.30069	2.11692	2.88401	1.34469	2.39709	456.99	154.526	1683.98	895.89	5340.39	304.106	1411.04	217.162	130.611	>1,700 copies / 10 pg total RNA (marked in green)	<340 copies / 10 pg total RNA in at least 11 tissues (marked in yellow)
mir.10b.UACCCUGUAGAACCGAAUUUG	5.03857	0	26.5267	5.82842	0	2.52351	0	2.6521	811.004	314.689	1008.12	670.732	12276.3	26.6747	144.554	2537.63	42.0739
mir.141.UAACACUGUCUGGUAAAGAUG	2.22289	0	0	0	0	1.22761	0	0	5534.64	16.4628	5602.27	5297.39	903.542	22.3272	1585.23	98.6404	45.171
mir.142a.CAUAAAGUAGAAAGCACUACU	24.7482	37.663	7.69257	28.9887	31.3909	21.9906	34.1775	30.5759	227.639	277.732	754.679	809.713	269.366	200.281	989.487	802.475	4742.31
mir.182.UUUGGCAAUGGUAGAACUCAC	10.8181	7.09325	19.0528	4.27236	3.63416	3.08535	6.38727	3.16211	1856.35	4.91532	1432.07	877.811	348.991	73.5426	350.766	71.6226	12.6058
mir.187.UCGUGUCUUGUGUUGCAGCCG	92.6712	2025.46	121.485	42.7709	364.472	210.963	1940.05	770.434	54.5538	51.9259	32.4159	29.311	783.085	45.3911	200.728	20.6457	27.2461
mir.192.CUGACCUAUGAAUUGACAGCC	29.6385	37.0178	60.7108	29.6023	35.5643	29.3448	36.9229	38.5064	8574.87	80.8155	9041.02	9230.65	3659.53	4147.12	74.2586	90.69	19.1498
mir.192.UGACCUAUGAAUUGACAGCCA	4.51727	4.0669	6.19644	4.60139	4.05239	3.10031	5.49082	5.52578	1712.79	17.0522	2139.22	2238.91	949.104	1244.06	11.7705	24.0977	4.70303
mir.194.GUAACAGCAACUCCAUGUGGA	1.99099	1.67612	6.6133	1.63955	2.94367	1.47806	2.36079	1.96929	415.403	3.91158	694.419	1728.71	131.11	158.279	3.26309	0	0.818714
mir.199b.CCCAGUGUUUAGACUACCUGU	7.70603	9.7252	9.2231	7.55619	8.35859	10.5267	10.1972	14.0255	615.331	820.41	400.575	341.219	332.558	34.1522	1725.31	648.174	66.6376
mir.200a.UAACACUGUCUGGUAACGAUG	36.441	9.30988	1.99025	8.14418	18.5684	4.66085	7.84402	5.99606	28860.2	53.7406	16764.2	14395.6	15263.6	211.334	5335.84	244.69	80.368
mir.200b.UAAUACUGCCUGGUAAUGAUG	14.4799	3.98994	0.718779	4.13884	6.83462	2.16631	2.1291	2.76289	18499.9	23.3242	10044.5	8669.86	8482.02	114.067	2893.3	121.07	39.0128
mir.200c.UAAUACUGCCGGGUAAUGAUG	3.26024	0	0.405374	0.997985	1.11809	2.10066	0	1.12204	4736.92	21.2374	3371.82	3459.06	1010.21	18.6428	1881.58	98.1308	45.3849
mir.21a.AGCUUAUCAGACUGAUGUUGA	64.4627	146.409	42.7896	71.9625	69.6163	84.6457	103.653	162.033	1316.65	129.66	1819.53	1022.91	409.959	818.883	496.853	224.135	240.531
mir.429.UAAUACUGUCUGGUAAUGCCG	13.3939	4.43327	1.07923	3.07075	7.3185	2.03501	3.69789	3.17438	9682.78	14.1362	5221.39	4211.78	5375.12	48.9281	1588.57	81.818	17.5764
mir.451a.AACCGUUACCAUUACUGAGUU	30.0457	43.4461	23.4125	44.3266	32.6036	30.21	42.0221	43.4025	22.988	2184.89	31.5591	46.4284	758.897	594.73	1401.74	353.691	621.049
