# Supplementary material
Source: HighWire-hosted journal article supplement (doi:10.1101/rna.080566.125)
Supplement: SupplementalTable10.xlsx [file SupplementalTable10.xlsx]

## Sheet: Table S10
Pair#	Tissue	miRNAs per 10 pg total RNA	brain_amygdala	brain_caudate_putamen	brain_cerebellum	brain_cortex	brain_hipocampus	brain_hypothalamus	brain_nucleus_acumbens	brain_thalamus	colon	heart	ileum	jejunum	kidney	liver	lung	sk_muscle	spleen
1	brain_cerebellum	mir.124.AAGGCACGCGGUGAAUGCCAA	645.238	1475.58	888.868	950.867	890.497	482.568	1456.86	743.674	0	0	0	0	0	0	0	0	0
1	brain_cerebellum	mir.206.UGGAAUGUAAGGAAGUGUGUG	1.83133	73.149	585.722	2.13617	4.53625	2.70073	42.1166	14.2805	0.99189	2.50935	0	0	0	15.6095	1.0685	2328.39	0
2	brain_cerebellum	mir.124.UUAAGGCACGCGGUGAAUGCC	16782.6	31640.8	18815	25132.9	23442	13255.3	30890	16604.3	17.163	7.26847	13.5239	12.519	22.9511	5.23565	3.86961	43.013	3.89299
2	brain_cerebellum	mir.206.UGGAAUGUAAGGAAGUGUGUG	1.83133	73.149	585.722	2.13617	4.53625	2.70073	42.1166	14.2805	0.99189	2.50935	0	0	0	15.6095	1.0685	2328.39	0
3	kidney	mir.10b.ACCCUGUAGAACCGAAUUUGU	1.03736	0	3.77677	0	0	0	0	0	106.528	40.1	135.664	86.1937	1691.04	3.61066	24.2022	374.171	5.49521
3	kidney	mir.187.UCGUGUCUUGUGUUGCAGCCG	92.6712	2025.46	121.485	42.7709	364.472	210.963	1940.05	770.434	54.5538	51.9259	32.4159	29.311	783.085	45.3911	200.728	20.6457	27.2461
4	sk_muscle	mir.10a.UACCCUGUAGAUCCGAAUUUG	10.3735	6.42825	21.5581	8.74264	7.13703	8.29152	6.05111	7.49726	1590.69	598.649	5164.61	3088.45	18279.9	935.896	4723.63	742.225	450.902
4	sk_muscle	mir.206.UGGAAUGUAAGGAAGUGUGUG	1.83133	73.149	585.722	2.13617	4.53625	2.70073	42.1166	14.2805	0.99189	2.50935	0	0	0	15.6095	1.0685	2328.39	0
5	sk_muscle	mir.10b.UACCCUGUAGAACCGAAUUUG	5.03857	0	26.5267	5.82842	0	2.52351	0	2.6521	811.004	314.689	1008.12	670.732	12276.3	26.6747	144.554	2537.63	42.0739
5	sk_muscle	mir.206.UGGAAUGUAAGGAAGUGUGUG	1.83133	73.149	585.722	2.13617	4.53625	2.70073	42.1166	14.2805	0.99189	2.50935	0	0	0	15.6095	1.0685	2328.39	0
