# Supplementary material
Source: HighWire-hosted journal article supplement (doi:10.1101/rna.080566.125)
Supplement: SupplementalTable11.xlsx [file SupplementalTable11.xlsx]

## Sheet: Table S11
Cell line	Source	Origin	Media	Media supplement	Incubation temperature and atmosphere
K562	ATCC CCL-243	Chronic Myelogenous Leukemia	RPMI-1640, Fisher 11875093	10% FBS, Fisher A5256701	37C, 5% CO2
HEK293T	ATCC CRL-3216	Embryonic Kidney	DMEM, Fisher 11965092	10% FBS, Fisher A5256701	37C, 5% CO2
A549	ATCC CCL-185	Lung Carcinoma	Ham's F-12K Medium, Fisher 21127022	10% FBS, Fisher A5256701	37C, 5% CO2
HCC_38	ATCC CRL-2314	Mammary Gland Carcinoma	RPMI-1640 Medium, Fisher 11875093	10% FBS, Fisher A5256701	37C, 5% CO2
HepG_2	ATCC HB-8065	Hepatocellular Carcinoma	DMEM, Fisher 11965092	10% FBS, Fisher A5256701	37C, 5% CO2
HepG_2_2_15	EMD Millipore SCC249	Hepatoblastoma	DMEM, Fisher 11965092	10% FBS, Fisher A5256701	37C, 5% CO2
Huh7.5	Rice Lab; Blight et al., J. Virol., 2002	Hepatocellular Carcinoma	DMEM, Fisher 11965092	10% FBS, Fisher A5256701, no antibiotics	37C, 5% CO2
Huh7.5_mir122_KO	Evans Lab; Hopcraft et al., mSphere, 2015	Hepatocellular Carcinoma	DMEM, Fisher 11965092	10% FBS, Fisher A5256701, no antibiotics	37C, 5% CO2
MCF_7	ATCC HTB-22	Breast Adenocarcinoma	DMEM, Fisher 11965092	10% FBS, Fisher A5256701	37C, 5% CO2
MDA_MB_231	ATCC HTB-26	Breast Adenocarcinoma	DMEM, Fisher 11965092	10% FBS, Fisher A5256701	37C, 5% CO2
MDA_MB_468	ATCC HTB-132	Breast Adenocarcinoma	DMEM, Fisher 11965092	10% FBS, Fisher A5256701	37C, 5% CO2
SkBr3	ATCC HTB-30	Breast Adenocarcinoma	McCoy's 5a Medium, Fisher 16600082	10% FBS, Fisher A5256701	37C, 5% CO2
C2C12	ATCC CRL-1772	Mouse Myoblasts	DMEM, Fisher 11965092	15% FBS, Fisher A5256701	37C, 5% CO2
C2C12 differentiation for 7 days	ATCC CRL-1772	Mouse Myoblasts	DMEM-HEPES, Fisher 12430054	2% Horse serum, Fisher 26050088 for 7 days	37C, 5% CO2
